# Supplementary material for: Translational control of methionine and serine metabolic pathways underpin the paralog-specific phenotypes of Rpl22 ribosomal protein mutants in cell division and replicative longevity
Source: bioRxiv preprint, doi:10.1101/2020.02.05.935726, version 1 (2020-02-06)
Supplement: File3 [file 935726_file04.xlsx]

## Sheet: description
These are the 'expected_counts' from RSEM, after they were rounded
babel was run with nreps=1e+07, min.rna=20
test.groups were defined as test.group<-c("wt","wt","wt", "rpl22a","rpl22a","rpl22a", "rpl22b","rpl22b","rpl22b","rpl34a","rpl34a","rpl34a","rpl34b","rpl34b","rpl34b")

## Sheet: tp40
ORF	Sample1_groupwt	Sample2_groupwt	Sample3_groupwt	Sample1_grouprpl22a	Sample2_grouprpl22a	Sample3_grouprpl22a	Sample1_grouprpl22b	Sample2_grouprpl22b	Sample3_grouprpl22b	Sample1_grouprpl34a	Sample2_grouprpl34a	Sample3_grouprpl34a	Sample1_grouprpl34b	Sample2_grouprpl34b	Sample3_grouprpl34b
Q0010	6	1	2	26	13	7	6	3	15	4	7	8	13	4	17
Q0017	0	0	0	2	0	0	0	0	0	0	2	2	2	0	3
Q0032	0	0	0	0	0	0	0	0	0	0	0	0	0	0	0
Q0045	174	20	58	484	294	169	378	140	266	3222	2203	2381	7070	7975	11081
Q0050	626	102	302	4755	3215	1513	2080	795	1540	14308	13415	11598	27420	22593	41350
Q0055	465	64	152	2687	1789	815	1646	541	1108	14609	12675	11488	27475	23538	40762
Q0060	39	1	20	334	174	56	71	25	45	933	718	868	1152	1908	2538
Q0065	45	15	23	278	253	66	56	19	33	790	737	795	1007	2167	2061
Q0070	23	19	23	582	359	158	182	31	114	933	794	837	701	1348	1742
Q0075	18	2	9	136	77	26	14	4	9	294	222	232	370	656	933
Q0080	0	0	0	1	0	0	0	0	0	4	1	2	13	9	17
Q0085	46	7	20	270	212	57	122	42	79	1239	864	1037	2883	2941	4522
Q0092	0	0	0	0	0	0	0	0	0	0	0	0	0	0	0
Q0105	199	15	54	872	747	246	492	187	337	4981	3782	3920	8709	8438	12917
Q0110	32	2	45	275	252	54	69	18	59	562	370	414	505	768	1289
Q0115	6	2	14	127	70	13	29	7	9	218	144	191	218	374	568
Q0120	57	3	17	485	377	138	139	64	113	587	497	512	509	761	1250
Q0130	54	8	10	127	84	30	81	22	74	244	165	164	699	584	885
Q0140	2	0	5	24	25	6	9	0	4	22	22	16	64	81	172
Q0142	5	1	0	4	4	0	3	0	0	3	3	4	7	11	9
Q0143	0	0	0	0	1	0	1	0	0	1	0	1	0	0	1
Q0144	0	0	0	0	0	0	0	0	0	0	0	0	0	0	0
Q0160	42	2	5	33	58	7	6	1	6	182	123	128	255	510	536
Q0182	1	0	0	11	8	1	0	0	0	18	8	9	3	18	35
Q0250	136	7	14	483	392	111	330	95	285	2669	1654	1776	4575	5140	6833
Q0255	20	1	1	115	121	19	26	14	24	311	219	224	431	599	969
Q0275	46	4	10	237	167	64	116	45	64	1260	895	968	3237	3168	4551
Q0297	0	0	0	1	0	0	0	0	2	3	0	1	9	6	19
YAL001C	234	12	23	751	356	159	335	95	203	1371	1277	1318	895	805	1311
YAL002W	151	4	20	553	310	156	232	71	108	1325	996	1024	960	859	1316
YAL003W	760	71	110	8059	5320	2524	4309	1672	2646	3827	3630	3256	2479	2662	2578
YAL004W	0	1	0	133	99	67	140	28	55	43	239	178	56	87	92
YAL005C	268	12	36	2147	692	586	735	176	417	3215	1550	1438	1627	1520	2889
YAL007C	105	4	19	558	288	128	212	80	116	504	523	489	355	332	416
YAL008W	352	19	46	121	95	22	50	9	31	275	198	211	147	162	216
YAL009W	186	10	34	210	161	41	90	24	65	275	219	264	276	215	320
YAL010C	163	12	27	328	165	66	165	45	88	256	311	295	314	269	401
YAL011W	108	8	24	624	352	166	297	93	155	902	925	969	829	653	755
YAL012W	161	9	14	648	514	234	335	112	142	792	829	700	1258	869	1223
YAL013W	145	13	21	589	365	207	363	95	186	529	565	577	535	341	395
YAL014C	54	1	6	172	123	47	80	12	34	239	187	201	251	213	303
YAL015C	106	9	23	240	133	31	92	20	49	271	216	216	307	115	299
YAL016C-A	35	0	1	204	153	94	108	43	85	132	130	111	137	98	109
YAL016C-B	3	0	1	0	0	0	1	0	0	0	3	2	0	2	4
YAL016W	580	34	93	890	633	267	377	130	266	1162	908	883	963	1001	1281
YAL017W	269	9	34	1242	961	366	656	161	409	1846	1538	1427	1354	1267	2049
YAL018C	11	0	0	9	7	1	4	0	2	6	14	7	8	10	10
YAL019W-A	30	2	0	45	33	13	32	9	24	78	110	80	48	31	27
YAL019W	422	32	51	1982	1102	601	805	295	509	3072	3577	3396	3347	2868	2935
YAL020C	62	5	13	119	70	21	68	17	26	317	209	227	278	205	225
YAL021C	145	6	12	752	373	197	321	82	181	1879	1848	1776	2030	1603	2024
YAL022C	71	2	6	350	193	72	153	50	96	618	518	551	892	693	835
YAL023C	187	11	17	674	262	188	299	95	236	2187	2083	2064	2163	1964	2229
YAL024C	76	5	12	2083	574	387	724	268	311	1469	1725	1705	925	982	862
YAL025C	1973	169	565	1566	944	557	806	368	612	1340	1558	1757	1279	1200	992
YAL026C-A	93	15	45	207	140	63	117	44	60	111	124	115	96	120	145
YAL026C	251	18	49	944	617	240	327	111	221	1975	1782	1844	1920	1938	2241
YAL027W	214	12	50	496	364	175	292	85	168	243	272	256	253	200	254
YAL028W	77	4	15	274	172	57	138	27	77	343	255	236	193	134	286
YAL029C	323	13	56	2080	977	535	675	258	409	2412	2389	2400	1662	1584	2261
YAL030W	63	4	8	279	142	88	124	39	122	117	81	87	79	77	127
YAL031C	52	5	6	235	165	45	105	24	50	558	456	419	483	390	635
YAL031W-A	12	1	3	24	8	6	4	8	8	25	20	20	20	15	40
YAL032C	125	8	12	678	510	203	453	123	226	676	759	719	727	573	614
YAL033W	213	31	51	268	208	81	154	61	100	216	279	284	301	443	337
YAL034C-B	13	1	0	57	17	20	32	10	14	46	57	50	57	28	35
YAL034C	81	5	14	210	193	62	141	28	53	487	419	358	431	386	543
YAL034W-A	127	8	21	399	151	71	176	67	114	227	282	310	242	184	214
YAL035W	1129	156	400	5281	3663	2009	2470	1040	1754	5008	5029	5003	4071	3800	3785
YAL036C	119	4	13	296	147	48	89	30	40	634	585	607	734	611	690
YAL037C-A	0	0	0	0	0	0	0	0	0	0	0	0	0	0	0
YAL037C-B	242	39	24	50	51	91	74	21	0	672	312	387	116	288	349
YAL037W	48	4	13	80	50	12	28	10	17	132	131	106	250	167	281
YAL038W	403	22	26	2213	1018	629	1043	327	1134	4984	3100	3103	3823	3513	4458
YAL039C	88	6	8	161	194	64	123	40	74	653	416	463	879	489	640
YAL040C	64	5	18	242	175	66	119	30	48	532	458	450	686	488	623
YAL041W	232	19	44	1154	746	336	491	176	304	1439	1309	1401	1497	1209	1563
YAL042C-A	30	1	1	75	62	33	55	28	50	128	175	176	164	110	116
YAL042W	385	22	32	726	511	211	452	115	259	1905	1729	1702	1807	1524	1765
YAL043C	133	7	8	669	457	204	389	92	163	1448	1400	1459	1489	1145	1379
YAL044C	146	11	30	229	131	64	159	56	95	433	363	285	371	290	472
YAL044W-A	29	1	8	41	18	2	9	0	12	95	58	63	99	91	126
YAL045C	6	0	3	240	75	76	109	33	64	28	25	22	13	8	25
YAL046C	12	0	2	60	23	13	21	5	12	53	35	37	53	60	67
YAL047C	81	5	22	537	298	118	190	77	106	293	344	295	277	294	387
YAL047W-A	3	1	1	3	3	0	2	0	0	10	10	8	20	8	11
YAL048C	69	0	5	296	151	48	126	28	60	447	419	430	525	411	562
YAL049C	192	9	29	585	368	174	296	102	197	424	382	375	232	220	320
YAL051W	158	11	19	711	444	175	326	83	154	1306	1289	1197	1267	1260	1462
YAL053W	151	13	21	517	244	104	226	61	147	2025	1200	1361	2742	1997	3046
YAL054C	49	6	3	119	109	24	182	26	89	1250	787	771	588	727	956
YAL055W	120	8	18	360	243	104	216	66	184	179	172	145	83	49	69
YAL056C-A	13	1	6	37	28	13	15	15	13	48	51	51	84	55	70
YAL056W	657	49	151	989	666	259	518	143	332	1723	1539	1573	1712	1380	1820
YAL058W	68	3	3	418	219	85	145	44	84	580	589	672	709	504	632
YAL059C-A	7	0	0	79	34	63	66	26	30	7	73	70	10	14	6
YAL059W	713	159	287	583	431	167	154	109	147	649	529	543	783	832	708
YAL060W	126	11	13	263	200	93	154	42	77	437	265	240	393	284	589
YAL061W	364	17	76	743	1316	396	638	100	334	1550	1029	697	802	520	834
YAL062W	168	16	14	193	207	61	182	30	71	838	529	632	931	706	962
YAL063C-A	10	1	1	7	2	0	2	2	1	9	6	8	4	12	6
YAL063C	136	11	27	369	293	106	245	56	82	701	634	689	745	509	620
YAL064C-A	4	0	2	33	27	7	12	2	2	59	64	48	70	43	75
YAL064W-B	16	0	0	57	49	19	41	3	16	76	60	69	67	48	65
YAL064W	8	0	2	8	2	2	3	0	0	4	5	2	5	1	6
YAL065C	2	0	0	13	9	0	4	1	4	20	14	19	28	11	34
YAL066W	0	0	0	0	3	0	1	0	0	1	2	5	1	1	1
YAL067C	39	4	1	114	40	20	84	21	43	104	122	96	57	84	65
YAL067W-A	0	0	0	4	2	0	2	0	0	2	3	0	2	4	0
YAL068C	7	0	0	7	21	0	3	0	3	38	10	10	3	2	9
YAL068W-A	1	1	2	1	3	0	0	0	0	1	2	0	0	2	0
YAL069W	32	1	3	51	32	10	28	8	13	1	24	2	3	3	1
YAR002C-A	234	14	47	1277	706	471	550	266	481	628	577	595	543	541	626
YAR002W	305	15	37	2428	1501	715	983	361	581	1154	1279	1289	1284	1117	1109
YAR003W	441	31	51	420	224	91	165	62	108	414	371	392	331	283	321
YAR007C	202	5	17	684	217	146	235	73	158	800	778	731	600	640	833
YAR008W	188	16	31	341	76	78	148	52	71	283	378	356	190	216	183
YAR014C	374	16	56	943	496	244	458	154	284	1767	1825	1931	1911	1443	1681
YAR015W	164	5	17	442	197	125	360	153	208	845	880	658	787	846	1021
YAR018C	15	0	3	84	47	20	62	18	22	128	172	112	197	150	131
YAR019C	83	5	12	314	241	73	138	28	57	615	535	560	714	508	780
YAR019W-A	18	1	2	8	9	2	9	1	1	33	47	32	43	22	31
YAR020C	1	0	0	2	0	0	0	0	0	4	5	7	8	7	3
YAR023C	42	3	5	46	31	9	37	5	11	47	47	37	50	58	55
YAR027W	208	11	52	293	188	60	108	38	86	255	190	171	232	247	322
YAR028W	64	5	15	204	60	43	56	18	22	212	205	182	144	197	239
YAR029W	12	2	6	69	23	13	18	8	12	42	56	48	33	39	43
YAR030C	34	2	14	154	93	47	65	30	43	51	75	57	32	53	67
YAR031W	22	0	7	307	161	77	89	32	44	145	203	175	147	154	179
YAR033W	82	5	23	259	146	63	106	30	69	184	182	173	212	186	222
YAR035C-A	0	0	0	0	0	0	0	0	0	0	0	0	0	0	0
YAR035W	23	3	6	254	125	49	361	67	203	1091	802	775	1010	775	1214
YAR042W	138	14	23	1043	432	253	398	102	239	2088	1821	1882	1965	1430	2085
YAR047C	10	0	0	39	18	9	10	3	4	62	61	49	43	43	65
YAR050W	66	0	12	302	174	57	155	26	62	720	806	870	636	497	611
YAR053W	15	4	1	48	21	10	27	6	10	39	43	48	30	29	25
YAR060C	4	0	1	13	4	2	4	1	0	29	26	32	34	24	31
YAR064W	2	0	2	13	8	4	11	1	5	17	28	20	25	13	20
YAR066W	21	0	2	78	29	17	17	6	23	141	130	117	165	119	88
YAR068W	19	1	0	50	30	0	25	2	5	122	126	143	136	59	77
YAR069C	2	1	3	5	5	2	3	1	0	4	4	5	6	3	4
YAR070C	3	1	0	2	2	1	2	0	0	3	7	0	6	4	4
YAR071W	105	5	9	103	36	24	16	10	24	118	96	104	289	222	306
YAR073W	6	0	3	22	28	8	24	1	7	22	41	9	61	31	27
YAR075W	21	1	2	27	18	7	10	2	1	0	9	0	8	3	3
YBL001C	718	115	251	1336	928	500	817	333	639	474	468	400	330	281	344
YBL002W	34	3	5	228	88	62	161	82	120	238	322	270	135	204	171
YBL003C	35	5	9	113	49	43	115	66	135	161	273	193	142	215	184
YBL004W	1563	117	238	3304	2045	906	1076	480	976	6407	6281	6750	8285	8243	8679
YBL005W	209	7	23	423	325	95	178	58	97	813	656	733	1082	858	1064
YBL006C	144	10	18	660	409	192	251	114	140	475	504	504	771	683	783
YBL006W-A	0	0	0	0	0	0	2	0	0	0	0	0	0	0	0
YBL007C	207	16	28	1344	633	353	570	163	356	3152	2766	2740	2911	2272	3357
YBL008W-A	2	0	0	4	3	2	1	0	1	6	7	13	11	5	7
YBL008W	82	1	3	437	257	114	223	59	95	773	767	783	605	596	638
YBL009W	62	1	10	406	173	83	185	64	87	592	589	609	541	481	486
YBL010C	126	3	10	496	210	128	194	89	108	454	518	462	266	281	274
YBL011W	710	98	96	525	308	129	225	67	124	1398	1092	1220	1718	1349	1735
YBL012C	6	0	0	64	43	26	38	7	21	155	171	156	243	133	211
YBL013W	12	0	1	133	59	22	55	14	32	287	256	269	369	185	366
YBL014C	124	7	11	897	429	217	249	92	178	1451	1506	1580	1704	1380	1528
YBL015W	62	2	11	103	79	34	151	23	79	612	463	353	573	634	866
YBL016W	38	2	4	55	48	12	35	11	14	168	141	127	204	203	189
YBL017C	339	15	54	1791	881	501	758	237	542	3605	3399	3281	2893	2698	3675
YBL018C	53	15	8	58	22	4	21	7	7	121	114	112	159	156	168
YBL019W	170	5	31	174	133	41	81	26	57	278	242	239	220	189	269
YBL020W	188	4	13	665	443	177	295	108	200	944	876	935	699	846	815
YBL021C	226	6	20	289	163	73	177	63	92	281	220	253	267	279	224
YBL022C	339	17	15	1953	1461	643	854	238	598	2633	2333	2194	1902	1776	2589
YBL023C	230	9	33	1215	564	288	499	165	291	1549	1531	1542	1895	1455	1626
YBL024W	220	31	53	1993	1469	686	887	369	568	2205	2028	2103	2141	2202	2091
YBL025W	58	3	4	301	175	80	173	73	145	235	264	288	286	257	201
YBL026W	207	76	101	184	109	61	84	39	73	129	135	140	248	281	287
YBL027W	1813	132	357	5660	3150	1765	2988	1306	2462	3915	3977	3151	2642	3417	2852
YBL028C	673	223	425	1738	1229	730	742	439	630	420	573	496	569	653	473
YBL029C-A	61	3	5	113	50	30	43	13	13	68	61	40	65	58	80
YBL029W	298	20	56	544	222	132	278	76	179	449	475	438	390	393	426
YBL030C	218	15	18	321	268	103	142	36	108	924	444	471	661	625	638
YBL031W	56	6	7	1196	472	303	609	252	286	322	508	395	182	188	200
YBL032W	97	4	9	1078	613	327	602	226	350	879	896	896	709	724	705
YBL033C	123	8	14	448	261	131	196	65	129	893	681	703	1397	849	1153
YBL034C	120	6	19	1423	474	259	451	150	240	1221	1370	1439	1194	1123	1337
YBL035C	113	5	12	594	118	123	211	61	125	628	749	711	586	651	695
YBL036C	952	138	259	576	306	159	302	114	251	547	561	581	544	504	530
YBL037W	105	7	15	365	232	73	201	56	96	739	677	667	469	547	563
YBL038W	277	26	75	435	289	106	155	56	122	553	538	519	526	515	582
YBL039C-A	0	0	0	0	0	0	0	0	0	0	0	0	0	0	0
YBL039C	528	58	93	858	563	247	308	150	263	2137	1958	2034	2368	2415	2195
YBL039W-B	11	3	2	23	9	2	9	1	3	16	6	4	7	7	15
YBL040C	503	79	104	456	313	137	194	77	150	443	378	412	326	415	453
YBL041W	452	13	52	630	423	207	293	96	199	742	583	607	607	580	697
YBL042C	242	21	49	283	185	64	174	55	102	1321	967	1109	2361	1649	2310
YBL043W	138	9	11	592	179	100	201	52	90	439	321	316	587	382	780
YBL044W	3	0	0	5	4	2	3	0	4	0	3	0	6	5	8
YBL045C	164	10	10	341	295	88	167	47	90	669	381	416	453	453	662
YBL046W	142	9	19	672	303	193	391	153	293	594	663	692	378	338	315
YBL047C	450	22	65	2887	2053	930	1406	385	834	4398	4197	4100	3873	3150	4856
YBL048W	21	0	4	153	73	51	31	7	24	82	89	90	31	37	44
YBL049W	159	9	20	74	36	16	38	10	27	153	100	113	62	93	108
YBL050W	577	34	98	753	575	249	434	152	333	686	613	608	582	594	737
YBL051C	135	15	31	938	547	261	345	108	163	975	1007	931	944	771	1078
YBL052C	113	10	23	640	279	138	244	88	129	545	685	651	335	363	401
YBL053W	54	16	38	328	160	96	211	96	149	79	131	111	26	27	22
YBL054W	338	23	54	2073	1071	605	693	386	429	1574	1776	1811	2032	1941	1550
YBL055C	322	19	83	339	187	79	118	39	78	643	596	661	845	754	870
YBL056W	559	22	108	677	480	188	270	94	221	975	721	737	1129	1060	1384
YBL057C	354	16	52	716	416	253	347	155	336	389	398	399	500	436	474
YBL058W	426	14	42	794	674	277	407	114	305	1394	1134	1092	1106	958	1265
YBL059C-A	132	24	69	558	342	192	275	98	215	140	166	143	149	156	180
YBL059W	47	4	7	538	326	195	310	103	212	228	282	262	275	206	221
YBL060W	326	18	52	649	344	173	289	107	164	637	640	738	489	546	562
YBL061C	206	8	47	436	289	137	189	67	107	1030	1054	1101	1237	1115	1258
YBL062W	70	18	29	96	41	14	34	17	33	75	81	68	104	93	92
YBL063W	146	8	23	565	276	128	248	72	131	481	593	532	450	485	550
YBL064C	151	4	13	214	161	53	125	24	47	333	191	207	210	234	385
YBL065W	4	0	0	33	7	9	16	3	1	35	35	48	55	39	49
YBL066C	123	4	17	733	462	185	418	97	193	1163	1180	1158	1073	1071	1258
YBL067C	462	19	61	1180	735	308	551	187	357	1501	1423	1469	1221	1227	1402
YBL068W-A	0	2	0	4	0	1	0	0	0	0	0	0	0	4	8
YBL068W	220	19	34	519	384	132	171	85	105	585	498	533	609	762	578
YBL069W	100	0	7	229	103	71	88	33	73	593	512	559	483	672	486
YBL070C	4	0	0	58	29	11	13	5	10	125	107	129	94	102	81
YBL071C-B	0	0	0	0	0	0	0	0	0	0	0	0	0	0	0
YBL071C	39	3	2	84	48	27	34	16	25	167	116	125	234	249	181
YBL071W-A	27	0	2	298	192	90	200	107	129	264	204	217	217	273	214
YBL072C	1050	73	195	3047	1860	1002	1736	855	1795	2088	1808	1618	1697	1878	1651
YBL073W	7	0	0	29	14	10	9	3	3	96	80	77	84	82	82
YBL074C	46	0	6	324	216	105	184	62	123	467	501	490	397	431	483
YBL075C	181	5	19	483	270	96	476	93	204	1666	1639	1350	746	1379	988
YBL076C	949	64	135	2987	1800	995	1225	489	956	4031	3648	3713	3463	3906	3817
YBL077W	182	43	39	64	32	11	21	6	26	97	100	93	125	152	172
YBL078C	271	14	75	341	329	90	199	45	110	220	143	135	163	151	235
YBL079W	378	39	55	1584	824	398	585	195	354	3133	3110	3299	3085	2971	3245
YBL080C	42	1	4	282	158	61	187	48	94	323	302	284	233	177	263
YBL081W	160	13	29	492	288	150	187	72	89	585	822	726	747	676	492
YBL082C	32	0	1	122	87	29	66	21	33	272	138	158	282	333	250
YBL083C	9	0	0	31	18	4	23	5	3	37	30	30	42	64	61
YBL084C	195	6	20	652	440	174	245	74	135	732	614	665	793	652	812
YBL085W	135	6	14	1252	737	388	836	302	473	1328	1413	1218	1349	937	1565
YBL086C	198	6	24	1327	1095	509	539	174	344	540	594	464	548	415	664
YBL087C	516	25	62	836	405	234	402	132	308	830	653	628	814	1058	953
YBL088C	227	11	29	1180	537	219	446	106	240	1936	1895	1912	1534	2046	2335
YBL089W	145	4	25	331	200	62	158	44	89	353	343	364	351	405	404
YBL090W	317	42	70	326	212	110	174	62	93	274	277	238	252	244	284
YBL091C-A	178	3	11	531	318	179	383	92	237	264	217	215	233	243	325
YBL091C	222	19	45	1148	715	416	603	218	426	1181	1138	1111	797	693	848
YBL092W	934	80	189	2331	1689	1027	2128	931	2119	1588	1578	1235	1752	2099	1624
YBL093C	886	70	184	1569	1063	531	818	399	623	940	1098	1117	1474	1013	1264
YBL094C	22	1	4	21	13	4	11	3	16	18	29	18	14	18	13
YBL095W	59	4	6	123	64	32	95	21	39	399	262	313	301	284	356
YBL096C	4	2	1	25	14	8	13	3	8	42	38	63	25	21	22
YBL097W	76	5	12	427	106	77	218	69	112	583	693	729	414	347	329
YBL098W	130	4	17	858	345	216	395	153	212	383	417	424	215	383	287
YBL099W	214	9	22	1453	1242	528	719	223	394	1841	1405	1359	925	1047	1337
YBL100C	2	0	0	30	40	10	2	4	11	97	44	46	36	43	59
YBL100W-C	1	0	0	2	3	1	2	0	1	5	10	3	3	3	4
YBL101C	278	8	36	1049	922	336	730	179	399	2069	1552	1509	1727	1261	2268
YBL102W	98	5	13	100	51	21	36	8	28	181	132	120	217	179	268
YBL103C	197	5	21	1204	694	334	603	218	363	950	1016	980	989	649	909
YBL104C	132	7	27	617	291	119	210	62	115	1047	1010	987	968	875	1081
YBL105C	211	9	23	1252	645	334	521	148	308	2467	2476	2437	2482	1968	2522
YBL106C	92	6	8	405	231	106	172	47	82	636	591	521	533	525	671
YBL107C	974	85	127	860	610	311	399	173	305	308	320	341	334	339	301
YBL107W-A	4	0	0	0	1	0	0	0	0	0	1	3	3	3	3
YBL108C-A	3	0	2	15	12	5	11	2	2	9	5	4	0	2	3
YBL108W	1	0	0	2	1	0	3	0	0	1	1	1	2	0	1
YBL109W	35	2	3	99	78	26	52	8	22	6	26	10	2	4	2
YBL111C	22	0	0	0	0	0	6	0	0	0	0	0	0	0	215
YBL112C	11	2	0	4	5	0	0	0	0	0	5	3	3	0	3
YBL113C	144	8	25	311	133	46	139	48	63	479	494	423	391	312	460
YBL113W-A	15	0	0	114	30	29	40	42	25	101	118	176	47	51	55
YBR001C	207	5	12	564	455	166	268	75	172	1149	1027	925	1109	949	1225
YBR002C	219	12	27	749	457	195	367	127	243	918	849	870	830	805	773
YBR003W	113	3	9	417	306	133	197	50	86	525	457	429	350	292	574
YBR004C	218	14	31	115	68	20	47	27	28	301	199	234	442	432	567
YBR005W	67	4	5	102	64	18	56	21	41	335	185	201	678	390	818
YBR006W	245	21	53	570	455	177	242	67	196	603	426	413	732	869	909
YBR007C	132	4	16	895	365	200	496	142	148	1142	1627	1409	1128	1114	1170
YBR008C	51	0	7	105	58	23	56	17	29	281	241	253	270	263	302
YBR009C	154	17	32	98	92	36	116	53	137	167	213	155	125	215	177
YBR010W	285	21	29	391	304	163	289	100	284	541	629	455	580	808	623
YBR011C	258	15	37	2153	1229	774	1136	429	731	1378	1423	1209	853	885	1198
YBR012C	33	2	2	18	20	7	7	1	2	44	41	38	48	85	74
YBR013C	65	7	15	46	15	10	18	4	3	79	51	66	77	73	82
YBR014C	556	34	93	832	805	332	385	121	252	617	571	552	512	516	495
YBR015C	232	15	31	784	489	213	338	108	221	1548	1544	1477	1717	1644	1761
YBR016W	121	12	41	624	401	230	363	131	252	446	381	364	718	457	577
YBR017C	470	19	66	1513	936	395	601	242	358	2178	2194	2262	2203	2061	2236
YBR018C	18	1	2	55	21	12	21	7	12	17	22	13	19	30	40
YBR019C	21	1	2	76	38	17	56	5	15	176	119	163	253	159	255
YBR020W	34	1	5	125	54	20	42	6	17	184	154	169	240	145	242
YBR021W	206	15	27	320	224	85	219	57	106	717	627	668	931	804	889
YBR022W	119	14	23	183	96	39	70	23	23	168	187	160	239	220	252
YBR023C	357	26	47	973	532	268	443	146	302	2636	2076	2371	2356	2302	2557
YBR024W	167	7	43	112	79	21	47	6	26	201	146	153	122	93	210
YBR025C	721	29	95	2588	1578	776	1134	536	887	2266	2086	1983	1381	1923	1506
YBR026C	134	5	27	245	141	55	106	18	61	386	282	219	184	232	335
YBR027C	6	2	1	19	8	4	14	2	3	1	3	2	1	3	2
YBR028C	190	10	17	959	800	305	324	125	189	861	866	916	1042	834	1128
YBR029C	296	19	34	305	287	86	95	41	64	508	396	422	1284	914	1213
YBR030W	117	3	12	744	511	213	262	106	140	794	756	746	1176	844	1087
YBR031W	508	46	41	1034	535	331	430	167	363	1897	1148	1169	1439	1746	1429
YBR032W	12	1	1	5	11	1	1	3	3	31	39	28	40	44	34
YBR033W	120	5	10	297	268	65	246	47	99	688	641	604	998	1107	1146
YBR034C	492	44	67	1395	811	386	472	247	334	1342	1270	1264	2103	1773	1723
YBR035C	206	8	33	282	137	68	98	34	77	353	263	246	406	317	471
YBR036C	255	14	25	214	148	60	116	30	74	688	468	482	764	682	787
YBR037C	103	0	7	401	257	123	226	71	123	332	325	316	258	177	282
YBR038W	54	2	9	132	98	48	156	35	86	118	170	109	124	264	147
YBR039W	229	10	25	1113	1037	403	684	262	434	1170	895	870	648	710	865
YBR040W	10	1	0	4	9	1	5	0	4	10	10	6	4	15	9
YBR041W	201	15	19	799	552	230	273	106	175	845	732	806	622	680	854
YBR042C	322	35	40	332	170	80	134	33	72	399	353	371	455	426	489
YBR043C	179	11	22	693	343	179	348	124	229	1306	1305	1277	1545	1096	1478
YBR044C	102	5	15	387	248	96	178	38	91	431	402	389	334	268	393
YBR045C	111	6	7	253	320	77	135	29	69	475	327	229	1024	647	1201
YBR046C	130	5	4	162	141	39	81	14	44	514	243	196	1014	571	1032
YBR047W	199	20	21	165	198	63	112	51	73	171	124	76	450	343	510
YBR048W	343	28	45	1495	1212	696	1269	462	627	1175	1210	1050	764	1038	917
YBR049C	169	3	19	2356	1396	680	962	365	626	1704	1769	1705	1115	1162	1293
YBR050C	68	1	12	189	202	61	278	67	165	313	287	282	278	214	314
YBR051W	21	0	2	41	56	12	117	20	68	57	56	51	50	24	49
YBR052C	310	14	66	246	170	60	95	34	68	318	204	163	265	215	366
YBR053C	161	3	17	394	184	84	167	41	78	357	244	230	134	150	259
YBR054W	703	10	73	1744	313	413	560	159	390	1853	1216	1305	536	1405	950
YBR055C	288	9	35	1481	856	413	592	261	393	1484	1642	1577	1532	1478	1521
YBR056C-B	7	1	2	2	4	0	3	1	5	41	19	27	62	52	72
YBR056W-A	11	1	3	16	8	1	12	5	13	56	32	31	121	75	90
YBR056W	411	28	113	263	149	69	165	27	90	632	354	296	318	256	582
YBR057C	211	29	57	1095	780	306	477	182	265	723	767	795	777	661	738
YBR058C-A	186	82	106	281	169	102	162	69	141	65	47	63	107	125	104
YBR058C	199	4	15	810	527	191	297	85	159	1102	991	1014	1154	1110	1219
YBR059C	191	7	22	1458	1093	444	735	193	403	1870	1618	1540	1223	1005	1752
YBR060C	106	1	3	773	465	230	341	123	183	674	815	740	655	566	611
YBR061C	203	6	14	327	195	74	98	40	66	496	398	433	608	646	659
YBR062C	379	51	109	250	148	69	125	39	106	218	199	215	325	294	313
YBR063C	120	6	14	166	74	28	33	12	27	413	372	375	433	454	442
YBR064W	4	0	0	49	31	13	16	6	14	33	54	48	50	20	24
YBR065C	45	3	8	492	286	124	198	59	130	734	593	699	666	641	757
YBR066C	490	52	139	1042	377	248	665	242	401	743	851	947	685	553	733
YBR067C	512	57	83	325	342	106	187	59	120	633	396	438	972	951	959
YBR068C	588	32	82	2010	1360	679	989	366	819	3454	2769	3040	4533	3003	4270
YBR069C	251	22	62	539	269	93	146	45	118	1220	853	1058	1848	1438	1603
YBR070C	21	0	1	98	42	9	42	12	17	129	149	134	160	92	166
YBR071W	25	3	5	481	100	138	289	89	153	321	506	418	359	355	402
YBR072C-A	0	0	0	0	1	0	0	0	0	7	4	3	0	1	0
YBR072W	54	1	12	441	170	110	1895	339	437	1398	932	645	470	875	901
YBR073W	140	8	13	389	129	68	151	43	82	585	584	543	368	462	450
YBR074W	475	24	72	1020	568	279	367	105	289	1868	1748	1802	1807	1856	1984
YBR076C-A	39	3	8	32	24	12	30	10	22	29	29	25	91	58	70
YBR076W	42	1	1	18	9	3	8	3	6	97	50	49	150	114	161
YBR077C	72	4	20	164	84	37	63	16	39	228	185	195	216	235	280
YBR078W	185	15	12	1056	315	238	483	167	362	1571	1326	1314	1959	2063	1928
YBR079C	703	30	50	4135	3060	1447	1765	741	1122	4830	4704	4608	4845	4811	4726
YBR080C	235	6	24	794	617	233	398	106	262	1319	1110	1213	1417	1300	1573
YBR081C	304	9	56	2106	1017	533	840	301	525	1656	1809	1881	1215	1141	1370
YBR082C	486	47	117	1410	975	526	689	302	548	781	677	647	918	815	760
YBR083W	80	7	12	615	881	262	381	107	180	535	480	539	687	407	554
YBR084C-A	1216	108	248	7064	4164	2374	4265	1831	3480	3171	3582	3003	2110	2663	2240
YBR084W	881	30	55	1138	609	304	361	117	276	3043	2953	3101	2968	3397	2881
YBR085C-A	317	65	129	327	327	114	138	48	90	254	155	178	340	225	326
YBR085W	27	0	3	72	48	21	28	5	15	76	79	68	112	62	126
YBR086C	288	11	21	1444	873	457	764	235	514	1755	1649	1481	1065	1122	1774
YBR087W	85	1	5	255	57	41	72	19	26	149	174	135	95	153	149
YBR088C	29	0	0	259	24	19	46	19	12	138	177	138	66	102	116
YBR089C-A	582	40	146	571	629	288	427	173	412	273	231	211	356	290	347
YBR089W	15	1	1	37	13	23	22	16	26	24	24	18	17	21	18
YBR090C	106	12	49	428	481	221	305	110	270	112	172	155	220	150	163
YBR091C	34	5	11	60	41	15	20	6	20	64	48	64	154	109	132
YBR092C	145	13	7	185	145	32	72	12	40	420	304	345	887	937	685
YBR093C	386	21	63	176	121	29	75	20	72	267	224	197	1273	597	1359
YBR094W	139	5	19	470	229	114	199	52	91	708	644	538	413	474	543
YBR095C	221	17	59	1285	673	383	554	263	393	814	881	798	800	699	848
YBR096W	149	10	20	110	72	16	37	11	23	174	108	124	177	225	267
YBR097W	244	7	33	591	313	132	239	60	124	813	712	648	380	431	736
YBR098W	152	7	15	1009	426	241	500	157	300	621	739	688	451	445	523
YBR099C	0	0	0	0	0	0	0	0	0	0	0	0	0	0	0
YBR101C	347	25	56	537	288	131	190	81	116	752	629	627	741	839	858
YBR102C	120	1	16	710	367	139	249	67	116	990	997	1024	890	784	995
YBR103C-A	1	0	0	0	0	0	1	0	0	2	0	1	6	2	5
YBR103W	189	2	25	435	267	110	168	59	107	563	522	538	450	383	461
YBR104W	187	34	53	297	178	62	99	33	42	309	360	355	517	432	559
YBR105C	201	20	25	1808	1139	601	804	420	548	2458	2103	2016	3854	2437	2843
YBR106W	528	62	94	691	409	217	328	125	236	997	768	793	1700	1374	1463
YBR107C	42	1	2	241	90	57	100	31	61	276	246	261	296	218	331
YBR108W	115	4	9	457	252	113	262	38	102	1101	977	1026	1155	736	1255
YBR109C	224	19	27	486	249	110	165	72	149	370	278	249	318	356	364
YBR109W-A	1	0	1	36	33	10	10	3	3	17	37	40	24	21	24
YBR110W	203	14	23	546	362	176	272	103	184	613	513	462	404	452	588
YBR111C	502	32	103	843	527	243	329	100	229	516	444	395	341	328	466
YBR111W-A	137	24	37	265	153	81	110	45	67	114	121	110	112	129	140
YBR112C	224	19	43	1930	870	531	902	268	525	2558	3010	2819	2304	1974	2313
YBR113W	9	0	1	230	87	78	70	14	16	190	268	233	204	153	210
YBR114W	109	8	12	798	683	264	319	78	158	1694	1540	1559	2056	1186	1592
YBR115C	71	2	6	421	170	84	149	38	104	1653	1148	1267	1544	1228	1660
YBR116C	11	1	5	72	59	17	38	15	17	55	59	82	94	73	74
YBR117C	29	0	1	122	81	31	139	13	36	477	285	240	215	389	258
YBR118W	1679	126	128	3320	1793	1173	1605	689	2237	5813	3787	3522	4279	4739	5064
YBR119W	157	9	29	844	503	230	374	157	284	397	429	384	455	472	519
YBR120C	207	37	76	418	376	149	227	92	175	227	265	256	314	320	382
YBR121C-A	0	0	0	0	0	0	0	0	0	0	0	0	0	0	0
YBR121C	1105	94	190	2204	1461	655	952	424	779	3187	2562	2565	2206	2603	2413
YBR122C	229	25	55	928	673	311	485	188	322	360	441	393	372	345	379
YBR123C	126	8	12	624	395	173	353	124	218	657	661	642	444	415	477
YBR124W	13	0	3	89	48	22	49	20	25	45	69	61	46	32	29
YBR125C	126	6	18	327	237	68	123	47	76	414	477	449	308	362	321
YBR126C	350	10	27	1063	778	337	584	137	352	1754	1121	886	1149	905	1571
YBR126W-A	32	3	7	104	54	29	45	19	62	60	42	47	40	37	59
YBR126W-B	9	1	2	14	3	1	6	0	7	31	14	11	12	16	20
YBR127C	484	36	73	3657	2264	1249	1739	674	1206	2761	2453	2344	1829	1810	2481
YBR128C	134	5	32	200	117	51	110	15	48	187	128	95	92	86	127
YBR129C	373	20	52	290	188	58	117	42	79	427	343	327	443	453	534
YBR130C	64	5	9	1298	813	359	455	183	276	590	676	609	624	561	658
YBR131C-A	0	0	0	0	0	0	0	0	0	0	0	0	0	0	0
YBR131W	86	4	15	468	274	140	194	89	139	517	466	483	431	439	480
YBR132C	150	12	22	260	250	69	184	24	94	832	590	587	825	733	972
YBR133C	101	6	17	568	277	130	194	63	115	1019	826	871	1266	1035	1315
YBR134W	5	1	0	14	5	1	1	2	2	49	41	37	84	56	71
YBR135W	52	7	2	271	155	75	144	60	81	222	262	228	305	282	274
YBR136W	123	6	15	964	376	224	347	82	161	1353	1388	1454	1175	1208	1530
YBR137W	125	8	28	139	85	28	51	10	26	133	101	89	83	107	151
YBR138C	23	1	1	43	34	9	39	14	18	45	54	47	44	78	71
YBR139W	152	4	16	643	379	173	342	74	208	803	499	483	454	446	781
YBR140C	493	40	71	1969	1122	486	776	200	451	4564	3886	4248	4285	3756	5518
YBR141C	45	2	8	359	166	62	104	42	47	428	430	457	853	655	748
YBR141W-A	0	0	0	0	0	0	0	0	0	0	0	0	0	0	0
YBR142W	815	66	211	1462	878	407	433	224	291	1537	1548	1631	2023	1860	1956
YBR143C	1232	98	203	1571	1168	476	683	277	498	1684	1402	1450	1590	1843	1759
YBR144C	6	0	2	16	9	3	5	4	0	8	12	11	20	20	18
YBR145W	96	8	13	142	75	30	74	24	47	165	122	142	329	191	384
YBR146W	149	7	16	1070	782	371	487	181	316	509	550	526	542	479	602
YBR147W	245	19	75	296	318	124	249	66	210	295	185	205	378	209	455
YBR148W	77	5	20	128	146	46	52	13	29	177	153	153	143	137	171
YBR149W	218	4	23	910	635	313	356	93	240	839	568	545	598	451	884
YBR150C	264	16	42	729	573	183	396	109	221	1232	871	1005	1657	1130	1996
YBR151W	390	16	62	508	326	150	248	79	217	642	547	493	644	500	737
YBR152W	72	1	7	915	593	312	382	172	214	662	828	833	860	566	684
YBR153W	94	3	16	225	141	58	106	29	32	303	340	319	279	283	326
YBR154C	940	105	239	774	511	240	273	134	225	634	691	683	659	738	671
YBR155W	160	14	44	760	411	178	219	104	103	775	835	836	942	716	826
YBR156C	27	2	7	660	143	156	276	95	102	399	597	507	409	362	375
YBR157C	80	3	25	554	175	152	741	236	344	736	849	740	309	332	362
YBR158W	34	1	3	451	190	101	139	38	79	926	880	866	471	886	922
YBR159W	239	21	32	306	135	54	105	28	47	413	389	352	281	349	347
YBR160W	133	3	13	389	190	106	199	66	131	363	342	368	400	361	362
YBR161W	62	3	8	241	108	54	97	35	35	245	242	235	103	132	185
YBR162C	63	5	19	329	166	75	157	41	87	801	602	651	608	534	682
YBR162W-A	185	85	193	533	326	213	313	169	258	247	248	240	320	269	267
YBR163W	111	5	11	627	406	180	273	96	139	669	628	708	795	637	885
YBR164C	387	63	87	181	101	45	56	29	49	289	238	259	274	309	302
YBR165W	423	37	78	646	537	270	379	182	268	472	454	495	659	545	629
YBR166C	483	38	74	307	151	58	101	26	41	449	447	444	534	583	576
YBR167C	134	14	34	182	72	45	56	25	53	103	81	85	148	160	168
YBR168W	120	5	21	146	130	38	65	7	35	220	170	161	122	143	192
YBR169C	283	9	31	1479	610	387	888	184	464	2167	1703	1468	977	1173	1529
YBR170C	139	3	14	409	292	101	160	46	82	982	751	755	738	647	856
YBR171W	230	25	41	790	555	268	324	127	209	536	602	556	590	534	569
YBR172C	475	32	100	2166	1211	633	977	370	580	1871	2088	2080	1810	1671	1545
YBR173C	247	18	69	998	548	309	357	125	298	324	364	307	419	471	440
YBR174C	6	0	0	34	16	4	8	1	3	27	41	32	20	21	26
YBR175W	157	10	20	154	77	33	59	16	21	252	232	231	256	285	245
YBR176W	102	3	5	146	99	25	33	19	26	186	133	143	165	145	261
YBR177C	215	6	16	631	481	203	226	65	101	655	573	545	1267	814	1363
YBR178W	5	0	1	37	41	8	2	0	2	28	42	40	68	40	80
YBR179C	142	7	13	809	417	175	309	99	158	952	875	935	988	931	1211
YBR180W	36	2	6	154	67	22	90	31	41	143	164	192	116	136	107
YBR181C	2410	173	511	2187	1266	718	1280	565	1244	2050	1983	1649	1121	1703	1308
YBR182C-A	4	0	0	2	1	0	0	0	0	3	7	2	8	5	4
YBR182C	26	1	7	185	57	30	97	31	46	456	310	376	517	396	466
YBR183W	306	22	54	289	167	80	137	42	109	330	218	225	248	271	344
YBR184W	33	1	6	154	65	31	118	42	41	110	176	128	54	91	77
YBR185C	104	6	15	225	126	40	73	22	29	152	140	123	206	237	224
YBR186W	51	1	7	75	32	8	35	17	16	101	112	100	71	107	92
YBR187W	157	8	16	255	134	54	102	32	72	627	552	589	483	619	483
YBR188C	201	7	30	344	214	91	173	65	109	204	233	221	154	181	186
YBR189W	1066	70	110	3113	1464	869	1397	565	1239	2610	2112	1935	1807	2386	1938
YBR190W	9	0	0	26	8	2	9	5	5	27	45	43	26	36	30
YBR191W-A	0	0	0	0	0	0	0	0	0	0	0	0	0	0	0
YBR191W	713	47	80	953	519	267	475	157	348	1387	1115	952	1220	1717	1322
YBR192W	369	24	99	350	219	102	163	52	97	537	546	536	525	498	511
YBR193C	100	2	11	764	438	215	341	140	290	318	409	405	298	291	326
YBR194W	56	4	15	303	247	125	216	79	155	142	155	153	157	121	149
YBR195C	118	4	9	484	242	139	368	112	174	676	620	573	568	660	624
YBR196C-A	3	1	1	0	2	0	1	0	0	4	1	1	1	4	4
YBR196C-B	0	0	0	3	3	1	3	2	1	1	3	6	4	3	2
YBR196C	1094	60	108	1290	609	319	723	203	559	2796	1536	1777	1992	1747	2603
YBR197C	53	1	5	292	123	55	126	30	71	446	464	440	495	427	477
YBR198C	265	9	36	881	426	204	413	104	210	1943	1812	1864	1682	1435	1667
YBR199W	525	11	76	1407	982	441	720	251	550	1459	1364	1337	1284	1122	1533
YBR200W-A	4	0	2	4	2	1	5	0	3	7	5	10	2	3	7
YBR200W	170	9	16	435	319	109	172	44	67	891	826	805	983	835	1045
YBR201C-A	124	10	31	78	58	18	48	8	34	70	57	60	77	61	94
YBR201W	230	18	51	499	334	139	279	124	170	246	183	185	176	140	229
YBR202W	139	1	9	1082	335	254	322	132	177	1302	1241	1131	1150	949	1289
YBR203W	270	18	54	693	743	242	483	137	263	861	880	757	1158	737	1115
YBR204C	58	2	8	123	86	30	45	14	30	216	166	155	170	140	266
YBR205W	53	2	7	318	266	81	153	41	76	484	548	542	453	401	515
YBR206W	14	0	1	51	42	16	25	3	15	87	100	114	70	76	76
YBR207W	211	9	32	255	211	75	115	29	102	612	430	464	694	674	748
YBR208C	211	13	21	383	211	72	305	64	147	2722	2244	1979	4671	4691	5557
YBR209W	1	0	0	8	2	1	1	2	1	1	1	4	2	1	3
YBR210W	168	27	31	179	94	36	51	20	33	155	161	143	162	218	192
YBR211C	316	45	112	594	510	200	286	115	196	302	306	306	323	324	370
YBR212W	139	3	13	497	396	160	369	98	200	1130	921	924	793	673	927
YBR213W	34	1	5	140	62	37	56	16	25	254	283	283	293	218	269
YBR214W	125	9	18	257	198	80	169	26	68	722	365	328	549	440	772
YBR215W	216	7	25	1335	585	347	484	172	253	825	988	855	748	650	687
YBR216C	134	3	15	462	292	112	169	58	109	635	534	537	512	478	681
YBR217W	127	16	27	347	172	75	100	42	56	153	157	134	146	136	182
YBR218C	267	11	31	1418	734	396	549	156	393	2759	2369	2291	2657	2100	3181
YBR219C	13	1	1	10	6	4	5	2	4	18	21	22	53	35	52
YBR220C	47	2	2	83	29	7	31	9	15	339	258	270	613	408	551
YBR221C	134	1	11	1036	752	388	507	168	275	901	846	807	633	570	861
YBR221W-A	0	0	0	0	0	0	0	0	0	0	0	0	0	0	1
YBR222C	205	12	20	236	124	63	175	55	130	1237	769	646	2622	2263	2880
YBR223C	23	1	4	285	200	67	147	34	63	390	341	344	477	267	514
YBR223W-A	0	0	0	0	0	0	1	0	0	2	0	2	4	1	8
YBR224W	10	2	4	113	99	34	81	18	43	63	101	84	102	69	96
YBR225W	125	9	45	572	426	157	283	66	151	1072	998	962	1013	805	1227
YBR226C	25	1	2	31	20	6	13	2	5	27	16	18	33	41	53
YBR227C	333	10	40	437	324	119	197	58	111	611	572	564	490	381	525
YBR228W	166	9	32	224	172	76	116	38	70	391	366	403	387	303	363
YBR229C	138	7	38	1187	715	352	519	160	299	1259	1123	1030	670	631	1045
YBR230C	399	38	106	1023	1459	689	576	188	645	451	310	275	636	382	574
YBR230W-A	12	3	5	54	18	6	37	6	14	37	32	24	30	12	19
YBR231C	130	9	27	146	97	45	91	20	51	372	341	380	346	285	298
YBR232C	3	0	3	59	32	23	32	18	20	45	66	54	36	31	33
YBR233W-A	86	18	49	113	77	28	59	19	40	94	113	97	148	106	134
YBR233W	40	1	13	409	251	96	147	39	75	327	299	308	222	237	227
YBR234C	134	7	22	507	284	135	171	57	113	754	562	575	494	404	724
YBR235W	150	7	40	321	167	53	93	25	65	947	747	791	929	914	1124
YBR236C	286	21	69	590	335	185	293	111	220	523	464	493	556	503	708
YBR237W	199	14	72	703	380	191	285	91	201	869	903	918	982	792	1057
YBR238C	127	16	30	1009	720	319	225	92	108	1260	1139	1255	1752	1381	1344
YBR239C	89	7	21	674	444	171	304	97	142	627	756	797	788	591	652
YBR240C	24	9	2	114	54	23	73	22	39	191	225	194	698	387	530
YBR241C	36	1	8	160	97	30	118	18	43	348	248	216	240	243	358
YBR242W	485	47	103	493	218	141	204	80	151	430	482	474	535	534	470
YBR243C	98	7	12	224	114	57	92	30	50	536	492	532	597	517	551
YBR244W	173	6	8	53	40	15	19	3	14	110	63	68	149	216	227
YBR245C	461	57	82	2249	1079	602	942	333	585	2081	2390	2223	1508	1455	1607
YBR246W	84	5	8	508	326	149	236	74	124	462	435	446	517	473	498
YBR247C	435	38	87	2690	1776	989	1107	592	682	1740	1863	1928	1938	2031	1622
YBR248C	133	6	16	810	452	242	379	156	228	1131	1271	1116	787	769	853
YBR249C	256	15	28	903	480	249	348	148	260	852	741	693	829	1076	851
YBR250W	46	1	13	128	73	13	61	20	19	66	85	80	50	95	56
YBR251W	162	5	24	229	158	69	100	42	70	350	307	320	348	338	354
YBR252W	97	12	22	364	151	73	140	54	64	242	280	276	282	262	252
YBR253W	247	51	99	445	305	155	241	93	167	279	243	267	273	295	325
YBR254C	128	16	35	196	80	34	73	19	37	148	174	164	165	153	155
YBR255C-A	148	5	16	115	82	20	62	17	38	123	92	111	129	112	122
YBR255W	224	19	43	618	298	140	279	93	196	742	755	760	512	412	594
YBR256C	433	45	127	643	458	233	300	112	211	543	492	550	811	443	833
YBR257W	465	66	141	714	363	217	249	133	181	415	497	492	651	640	602
YBR258C	100	13	35	76	39	13	32	10	16	97	81	92	88	90	89
YBR259W	175	6	15	461	208	86	138	52	90	417	376	373	397	360	472
YBR260C	111	4	7	735	508	227	317	90	149	781	712	721	790	649	910
YBR261C	56	4	6	315	252	91	139	35	60	439	402	461	617	468	588
YBR262C	334	44	71	181	149	71	122	53	96	212	223	191	302	257	263
YBR263W	188	4	16	490	280	133	177	65	138	996	818	872	896	858	882
YBR264C	61	4	15	100	40	15	43	11	30	172	133	145	167	160	170
YBR265W	141	3	12	232	156	54	93	31	62	538	446	438	558	560	614
YBR266C	108	0	8	368	296	170	228	136	203	94	152	80	0	7	0
YBR267W	317	10	28	1397	782	458	588	316	416	1376	1488	1462	1756	1701	1470
YBR268W	182	31	55	252	170	82	129	42	98	153	134	134	218	185	177
YBR269C	169	13	18	891	690	315	678	207	477	351	376	285	280	246	328
YBR270C	102	7	16	127	73	32	65	18	21	390	291	300	282	280	343
YBR271W	128	11	12	235	136	72	102	48	66	476	453	482	572	478	472
YBR272C	118	4	8	364	218	101	163	46	97	369	310	303	259	266	334
YBR273C	231	7	28	872	620	301	515	172	362	796	722	741	733	657	785
YBR274W	154	7	42	259	158	54	87	28	70	321	303	269	320	328	405
YBR275C	140	8	13	1574	367	297	574	169	241	1703	2206	2051	1078	1153	1360
YBR276C	222	6	18	287	152	68	136	31	92	705	684	665	485	438	685
YBR277C	6	0	2	219	130	47	79	24	39	55	85	87	73	74	45
YBR278W	359	35	78	933	546	294	467	192	349	306	380	340	358	339	361
YBR279W	343	61	143	2239	1402	629	909	370	624	1054	1251	1188	953	790	926
YBR280C	83	10	11	127	117	25	91	21	31	424	299	295	272	266	410
YBR281C	115	10	14	360	135	79	152	52	64	493	533	530	421	399	486
YBR282W	170	19	50	206	134	70	130	55	94	187	183	171	260	193	215
YBR283C	304	11	30	823	552	226	291	101	192	1403	1190	1119	1163	1315	1262
YBR284W	68	3	5	154	136	33	79	14	37	223	173	177	229	189	364
YBR285W	132	20	49	202	376	103	96	21	65	84	54	28	61	49	107
YBR286W	947	78	125	2721	1829	948	974	300	718	3683	3096	2663	2903	2442	3315
YBR287W	508	17	70	515	443	174	298	114	223	1135	744	767	1372	948	1449
YBR288C	221	13	25	838	605	210	309	129	197	543	506	505	508	548	603
YBR289W	304	11	29	1427	735	367	665	174	357	1498	1978	1789	1592	1264	1492
YBR290W	1052	182	377	1293	905	518	872	390	772	794	996	949	1051	861	943
YBR291C	43	2	1	57	32	9	29	8	27	354	169	251	349	346	303
YBR292C	4	4	2	23	12	5	12	2	5	13	12	13	35	36	32
YBR293W	21	0	5	49	45	9	29	3	7	94	71	52	91	110	113
YBR294W	50	0	10	487	311	107	237	72	89	686	573	683	835	594	844
YBR295W	120	3	18	227	115	41	131	31	55	1067	738	800	1408	959	1389
YBR296C-A	0	0	0	1	0	0	0	0	0	0	0	0	2	0	1
YBR296C	114	6	17	85	59	17	83	33	78	410	315	288	1524	749	1730
YBR297W	48	3	10	62	262	43	69	16	28	166	103	127	270	144	315
YBR298C-A	0	0	0	1	1	0	0	0	0	1	2	1	0	0	1
YBR298C	133	6	24	113	133	31	110	22	46	242	178	181	189	172	256
YBR299W	7	1	5	36	20	0	25	0	13	30	51	12	14	7	25
YBR300C	3	0	3	0	8	0	9	0	1	15	8	5	14	6	19
YBR301W	0	0	0	8	7	0	3	3	5	10	12	6	3	0	9
YBR302C	355	47	88	276	184	92	137	54	150	300	241	232	305	285	385
YCL001W-A	7	1	1	30	25	12	7	4	4	18	13	14	18	13	22
YCL001W-B	13	1	1	11	10	1	9	4	2	7	10	9	23	19	12
YCL001W	417	52	144	517	346	162	224	76	132	416	378	397	366	407	389
YCL002C	166	25	44	266	163	69	84	37	43	286	312	318	268	260	299
YCL004W	77	2	3	269	192	65	112	22	40	348	303	315	353	283	390
YCL005W-A	40	1	4	172	99	54	66	25	32	127	128	101	135	133	146
YCL005W	55	3	7	275	174	68	137	48	56	201	192	210	268	219	233
YCL007C	20	0	4	83	56	11	22	12	16	87	97	106	140	93	109
YCL008C	60	1	6	280	158	62	117	42	66	443	405	465	438	266	417
YCL009C	42	8	11	307	112	87	67	22	57	810	605	609	894	652	940
YCL010C	70	3	7	246	140	65	132	34	54	642	576	632	550	414	495
YCL011C	532	27	73	437	270	130	246	74	129	1594	1422	1441	1096	1006	956
YCL012C	56	3	24	144	144	38	60	18	31	147	126	119	95	94	118
YCL014W	114	9	15	730	246	137	333	106	179	1424	1546	1484	1509	1376	1425
YCL016C	244	6	36	666	364	155	281	96	173	480	463	460	475	450	418
YCL017C	166	13	23	571	455	187	236	97	159	1126	945	1063	1050	928	1071
YCL018W	0	0	0	0	0	0	0	0	0	0	0	0	0	0	0
YCL021W-A	7	0	2	39	9	6	19	10	8	28	16	20	22	24	43
YCL022C	22	0	0	116	36	28	46	17	31	55	67	62	32	13	19
YCL023C	0	0	0	23	4	7	6	0	3	30	42	38	34	25	40
YCL024W	150	5	16	915	101	171	230	78	97	786	1061	871	470	559	845
YCL025C	446	67	112	789	440	232	552	230	404	2437	1837	1814	4426	3225	3916
YCL026C-A	9	0	0	7	5	3	4	1	3	50	33	38	160	142	156
YCL026C-B	2	0	3	19	12	1	7	3	2	34	26	21	40	30	47
YCL027W	28	3	5	41	37	15	28	9	12	69	101	74	72	61	82
YCL028W	214	12	18	767	441	256	377	103	242	951	884	930	906	761	921
YCL029C	127	4	28	1085	529	281	429	175	254	697	896	836	789	620	734
YCL030C	139	9	31	1035	430	283	505	197	316	1560	1485	1244	1679	1114	2311
YCL031C	1383	133	311	1591	1060	538	679	292	502	1075	1118	1110	1253	1369	1350
YCL032W	273	12	27	526	289	137	238	68	139	434	360	355	340	275	356
YCL033C	75	9	19	163	79	36	70	16	46	107	67	71	61	51	95
YCL034W	135	5	19	301	243	92	188	50	114	632	504	505	475	432	607
YCL035C	452	44	157	755	382	276	496	193	361	420	380	303	276	284	399
YCL036W	244	9	62	354	171	57	113	57	74	943	835	796	951	816	762
YCL037C	108	10	31	1620	714	505	645	264	415	1826	2141	1802	1883	1852	1481
YCL038C	313	27	66	74	58	10	50	10	20	388	245	264	575	578	774
YCL039W	207	26	62	282	236	79	159	35	79	712	513	501	468	349	677
YCL040W	383	18	35	1188	798	341	756	156	502	1798	1114	827	1712	1070	2389
YCL041C	7	1	2	126	130	46	91	20	30	305	234	289	338	241	204
YCL042W	50	7	20	297	181	107	147	49	122	206	126	115	263	163	292
YCL043C	426	49	46	2074	1511	765	1231	328	778	3192	2409	2775	2868	2944	3079
YCL044C	63	6	27	311	232	89	155	44	70	447	396	381	426	359	431
YCL045C	186	18	31	805	553	221	310	86	181	1426	1359	1411	1536	1434	1683
YCL046W	10	1	3	75	59	34	29	14	24	108	132	126	152	103	115
YCL047C	89	4	20	281	166	62	125	40	71	140	135	129	96	94	149
YCL048W-A	12	0	3	11	4	2	11	2	3	23	9	19	17	13	13
YCL048W	31	2	14	37	45	5	33	7	5	29	27	11	17	26	21
YCL049C	154	9	22	807	620	263	438	131	231	820	601	643	529	469	767
YCL050C	268	18	36	2018	1266	701	882	350	514	746	711	786	697	728	687
YCL051W	271	19	67	1104	858	360	544	178	351	906	966	922	853	671	1017
YCL052C	259	9	38	385	342	105	200	55	125	506	359	336	389	334	510
YCL054W-A	0	0	0	0	0	0	0	0	0	0	0	0	0	0	0
YCL054W	1379	167	387	2657	1372	771	950	411	707	2993	3263	3216	3109	2732	2654
YCL055W	268	28	62	471	312	157	208	87	156	250	263	232	290	298	305
YCL056C	336	51	99	98	46	26	46	10	26	133	141	169	140	151	129
YCL057C-A	47	1	3	94	44	18	29	8	31	132	75	93	182	171	172
YCL057W	145	4	15	500	331	139	219	54	139	1089	835	809	524	548	870
YCL058C	699	50	154	968	527	331	439	207	353	373	450	501	358	436	327
YCL058W-A	0	0	0	0	0	0	0	0	0	2	0	0	0	0	0
YCL059C	2304	127	368	2561	2130	977	1068	566	1073	1144	1254	1255	1410	1439	1333
YCL061C	100	6	39	1879	378	359	554	181	315	1135	1638	1470	1103	944	1297
YCL063W	34	5	8	394	129	84	237	108	161	436	471	475	326	323	271
YCL064C	605	32	95	793	335	177	565	226	321	1234	1103	907	1448	1890	1523
YCL065W	0	0	4	1	4	0	2	0	0	0	2	2	5	3	4
YCL066W	11	0	1	7	5	0	3	1	0	13	9	13	13	34	16
YCL067C	236	28	68	253	140	59	91	37	41	180	196	176	229	310	244
YCL068C	2	0	0	3	5	0	6	2	4	0	11	0	4	3	0
YCL069W	7	0	6	39	28	0	29	0	2	0	10	2	0	6	4
YCL073C	20	3	17	88	95	10	50	9	16	2	33	7	2	9	6
YCL076W	3	0	2	2	7	4	6	2	1	0	9	1	1	0	0
YCR001W	21	2	5	38	9	7	5	1	6	17	25	23	27	33	30
YCR002C	148	10	27	807	496	244	377	192	294	459	534	494	433	518	512
YCR003W	317	52	117	869	559	283	439	193	290	296	338	269	272	348	376
YCR004C	172	4	28	521	409	169	219	77	143	611	450	390	379	309	569
YCR005C	899	179	253	663	1018	345	419	159	342	1250	949	931	2046	3093	2312
YCR006C	13	0	1	44	31	8	34	4	11	105	78	94	133	118	141
YCR007C	142	6	27	316	273	114	162	60	115	301	257	235	309	289	333
YCR008W	328	23	60	993	717	286	426	150	274	1573	1497	1543	1411	1345	1399
YCR009C	478	73	189	781	412	194	284	91	224	642	562	491	651	591	799
YCR010C	46	2	10	83	34	19	116	26	69	784	544	543	327	409	501
YCR011C	647	20	70	1083	847	371	528	187	409	2002	1573	1488	1255	1129	1642
YCR012W	180	6	10	1043	312	258	412	100	298	1933	1036	1005	1098	766	1718
YCR013C	242	14	15	730	160	152	302	96	211	338	238	232	107	116	257
YCR014C	661	49	96	489	319	103	220	68	127	760	750	773	556	476	592
YCR015C	146	23	36	241	101	55	94	34	63	231	243	243	357	253	340
YCR016W	1225	144	347	2173	1309	676	698	414	554	863	1061	1010	1007	1103	940
YCR017C	423	44	46	532	290	132	234	60	177	1476	1202	1362	1214	1341	1569
YCR018C-A	101	40	53	121	74	18	53	13	24	138	132	106	202	189	272
YCR018C	137	6	21	55	37	12	59	17	32	137	117	112	139	201	174
YCR019W	144	2	17	208	153	44	115	25	71	353	302	288	297	301	317
YCR020C-A	85	17	15	83	39	18	19	8	8	54	62	62	74	73	75
YCR020C	193	10	18	176	130	48	108	39	111	247	174	208	628	639	597
YCR020W-B	265	53	108	517	390	216	284	145	222	143	161	155	146	237	201
YCR021C	470	14	47	384	91	59	185	41	103	481	391	372	452	662	819
YCR022C	4	1	3	15	21	4	13	0	1	14	19	14	24	22	18
YCR023C	236	10	28	662	356	155	292	83	172	677	730	679	650	595	797
YCR024C-A	64	8	14	61	29	19	22	10	18	51	43	38	61	72	56
YCR024C-B	271	25	62	70	34	14	37	13	25	179	103	113	168	227	185
YCR024C	83	2	14	467	254	120	218	65	101	422	464	449	352	354	485
YCR025C	8	0	1	26	7	0	7	0	2	43	50	48	54	56	50
YCR026C	250	12	36	603	244	122	268	75	205	1547	1574	1617	1852	1517	1892
YCR027C	130	7	14	164	83	38	61	18	31	299	216	240	352	342	367
YCR028C-A	323	49	131	266	173	59	136	35	94	284	261	240	312	308	341
YCR028C	150	8	20	266	191	62	114	37	87	798	624	698	796	757	755
YCR030C	155	5	18	742	521	217	409	92	174	1146	1026	875	696	620	1003
YCR031C	694	58	84	1900	1069	667	1151	434	1178	1793	1474	1214	1545	1906	1555
YCR032W	459	22	91	1154	598	238	411	114	275	2316	2106	2164	1989	2071	2789
YCR033W	324	13	36	2250	1192	603	1081	349	677	2993	3302	3178	3287	2625	3256
YCR034W	70	8	4	194	111	36	77	32	53	286	304	355	457	460	457
YCR035C	990	41	109	1668	1152	575	704	349	509	1340	1264	1250	1377	1230	1205
YCR036W	367	27	72	720	438	232	380	116	213	595	498	520	554	421	600
YCR037C	157	6	26	602	392	170	272	97	169	846	829	785	1197	1062	1151
YCR038C	77	9	23	435	376	123	220	57	97	355	458	407	478	361	454
YCR038W-A	1	0	0	0	1	0	0	0	0	1	1	0	5	1	1
YCR039C	236	28	68	253	140	59	91	37	41	180	196	176	229	310	244
YCR040W	11	0	1	7	5	0	3	1	0	13	9	13	13	34	16
YCR041W	73	8	8	73	51	18	33	19	14	67	64	61	67	75	66
YCR042C	483	22	67	1072	559	245	430	116	226	1793	1771	1892	1465	1441	1522
YCR043C	237	12	40	383	193	106	142	81	111	267	264	284	374	321	325
YCR044C	409	18	74	486	374	182	252	98	183	434	416	426	533	477	517
YCR045C	28	2	9	72	37	14	38	7	19	160	149	137	247	212	223
YCR045W-A	0	0	2	3	0	0	0	0	1	7	0	4	4	8	5
YCR046C	25	0	3	169	89	34	50	9	26	224	141	171	218	154	202
YCR047C	260	13	30	220	123	73	119	39	82	1103	944	1008	977	767	664
YCR047W-A	0	0	0	0	2	0	4	0	0	3	0	0	0	0	0
YCR048W	42	1	4	204	109	47	87	21	38	744	488	553	688	596	831
YCR049C	6	0	0	75	39	19	28	7	12	151	141	164	159	96	135
YCR050C	2	0	0	0	0	0	0	0	1	0	0	0	3	0	8
YCR051W	144	6	16	343	222	106	161	38	104	719	561	591	704	544	558
YCR052W	148	10	18	743	417	228	351	99	174	1162	1301	1239	1315	1038	1198
YCR053W	485	36	58	1119	720	328	394	133	226	1417	1194	1207	1353	1539	1490
YCR054C	280	11	35	529	286	124	184	62	97	501	521	498	494	581	553
YCR057C	301	24	45	1357	789	425	475	213	371	2497	2346	2470	2968	2841	2764
YCR059C	40	2	5	231	157	70	100	30	59	310	245	252	337	276	296
YCR060W	202	24	39	211	110	50	98	35	66	181	182	176	228	201	190
YCR061W	51	1	11	196	77	44	88	12	35	527	325	307	322	295	406
YCR063W	17	2	0	113	73	35	63	11	34	315	326	333	442	363	375
YCR064C	0	0	1	95	30	26	23	7	18	35	62	67	66	76	46
YCR065W	102	2	16	395	119	82	159	47	90	713	771	690	794	711	838
YCR066W	104	8	23	496	289	113	198	54	110	351	390	365	349	333	392
YCR067C	80	3	6	421	207	103	174	33	79	757	694	662	647	565	782
YCR068W	45	0	2	270	197	69	229	49	95	882	675	719	775	659	834
YCR069W	58	2	6	441	240	113	222	74	113	620	499	505	326	342	496
YCR071C	163	12	30	472	336	188	304	128	226	196	222	209	280	208	250
YCR072C	149	12	19	425	284	123	170	55	86	1239	1071	1110	1593	1477	1328
YCR073C	100	3	22	561	235	125	215	67	104	1050	932	1019	979	782	1202
YCR073W-A	103	3	3	146	96	33	85	12	40	340	223	231	265	215	306
YCR075C	17	0	1	32	16	8	15	3	8	57	49	48	42	45	63
YCR075W-A	49	5	5	43	23	9	11	4	11	16	12	13	17	14	14
YCR076C	129	22	31	188	101	35	97	26	58	281	262	279	217	178	235
YCR077C	368	23	69	584	283	143	214	56	123	1625	1313	1419	1364	1189	1489
YCR079W	230	6	23	183	138	45	117	23	58	425	312	305	325	257	397
YCR081C-A	3	0	1	12	8	0	0	3	0	6	5	14	9	9	14
YCR081W	144	6	13	920	587	263	398	143	243	1000	956	996	918	893	1088
YCR082W	427	77	195	462	373	172	204	69	202	334	277	277	347	346	412
YCR083W	118	9	22	872	545	311	518	141	337	255	214	227	195	184	237
YCR084C	322	11	32	1150	668	391	532	180	336	2360	2473	2375	2103	1857	1937
YCR085W	6	1	0	13	5	0	1	1	2	7	7	7	13	17	10
YCR086W	86	2	7	134	70	19	52	14	35	140	105	102	152	137	147
YCR087C-A	0	0	0	0	0	0	0	0	0	0	0	0	0	0	0
YCR087W	1214	91	278	979	642	312	396	186	339	773	934	905	1154	1018	956
YCR088W	142	6	10	944	338	295	342	97	184	1488	1368	1223	1086	730	1494
YCR089W	132	8	12	381	240	71	205	31	70	457	432	479	528	445	542
YCR090C	167	23	34	161	87	35	45	18	34	149	135	130	145	200	161
YCR091W	111	3	11	466	374	132	338	68	159	529	502	471	554	475	721
YCR092C	299	12	34	767	389	161	336	97	203	1122	1097	1243	940	984	992
YCR093W	253	19	26	2013	1034	513	629	177	368	3970	3745	3665	3583	3264	4364
YCR094W	114	5	10	459	324	133	194	66	97	470	526	512	536	515	603
YCR095C	516	62	151	802	497	214	289	128	208	527	579	558	579	599	667
YCR095W-A	2	0	0	36	36	15	25	7	13	32	39	28	35	30	42
YCR096C	59	21	51	68	80	30	66	19	44	172	123	96	114	229	234
YCR097W-A	0	0	0	1	1	0	0	0	0	0	0	0	0	0	1
YCR097W	365	114	171	448	261	139	165	84	118	213	221	226	286	361	358
YCR098C	195	6	19	106	86	23	64	8	30	127	150	98	218	161	300
YCR099C	25	0	4	87	57	24	43	9	18	68	58	53	33	36	51
YCR100C	40	0	3	62	57	14	24	6	7	89	69	77	52	50	90
YCR101C	33	1	3	107	113	55	80	14	39	114	88	78	60	72	86
YCR102C	71	1	4	12	14	2	7	6	1	28	26	16	36	26	57
YCR102W-A	2	0	0	0	1	0	0	0	0	3	0	0	1	1	2
YCR104W	0	0	0	11	3	2	7	0	2	2	6	0	3	1	0
YCR105W	24	1	5	128	90	37	87	14	26	103	104	88	107	87	93
YCR106W	48	1	7	236	150	47	95	20	29	352	304	271	455	412	532
YCR107W	74	8	9	181	92	37	74	23	38	216	213	194	247	230	271
YCR108C	12	1	2	54	37	11	36	7	9	1	15	3	2	2	2
YDL001W	243	17	46	474	262	147	235	101	158	484	472	480	455	407	458
YDL002C	826	57	210	1684	989	529	796	343	556	590	748	610	526	469	482
YDL003W	55	3	4	1278	314	269	540	194	253	535	1045	700	484	507	719
YDL004W	203	7	21	389	250	108	168	56	111	419	353	301	209	221	301
YDL005C	178	22	88	1961	1585	761	874	327	588	694	851	810	809	582	753
YDL006W	281	18	51	344	253	93	167	72	138	325	288	310	317	273	330
YDL007C-A	2	0	0	1	0	1	2	0	1	1	0	0	0	0	0
YDL007W	2787	193	455	1305	878	495	647	220	547	1626	1396	1379	1235	1317	1447
YDL008W	129	12	25	232	141	49	87	36	53	211	207	212	308	227	283
YDL009C	72	8	32	52	36	13	25	11	17	64	78	58	83	58	89
YDL010W	373	28	92	793	486	257	429	173	307	592	606	555	752	526	674
YDL011C	40	0	0	34	22	13	24	4	18	40	47	45	67	49	59
YDL012C	63	4	16	351	170	116	134	44	106	212	157	166	323	252	289
YDL013W	167	6	15	678	393	199	412	128	213	1325	1342	1398	1352	1110	1180
YDL014W	684	53	87	807	536	230	245	80	189	2020	1665	1590	1983	2168	1778
YDL015C	313	13	41	382	244	104	133	50	69	619	498	453	605	678	699
YDL016C	22	0	0	14	3	1	3	1	0	24	24	29	26	32	29
YDL017W	69	2	3	204	84	46	116	46	64	325	362	355	324	266	272
YDL018C	176	10	37	669	291	176	252	82	155	339	408	371	219	238	347
YDL019C	212	5	38	1323	805	387	557	124	399	1703	1455	1304	1035	934	1686
YDL020C	480	29	64	1363	1436	491	733	212	369	1557	1398	1434	2526	1827	2535
YDL021W	192	9	25	339	236	106	319	76	159	343	262	232	166	131	284
YDL022C-A	1	0	0	5	9	1	7	0	2	6	5	6	4	5	3
YDL022W	210	15	11	526	620	232	389	108	245	1750	983	935	538	686	811
YDL023C	11	0	1	52	107	33	74	30	19	343	325	235	155	119	149
YDL024C	32	2	7	141	122	26	77	10	30	253	160	158	197	125	238
YDL025C	178	11	32	496	408	140	319	84	193	855	758	739	979	758	1180
YDL025W-A	0	0	0	0	0	0	0	0	0	5	1	1	3	2	3
YDL026W	10	1	1	39	34	10	21	6	6	35	21	27	48	32	37
YDL027C	246	16	57	249	230	60	134	36	58	289	215	214	167	217	338
YDL028C	149	9	20	544	277	128	231	88	151	851	922	838	817	748	866
YDL029W	219	7	24	889	457	200	293	90	227	751	563	514	554	470	901
YDL030W	178	9	21	538	344	159	219	107	153	550	536	534	541	575	538
YDL031W	593	56	112	2198	1392	603	651	282	466	3016	2985	3196	3383	3108	3313
YDL032W	8	0	1	23	18	11	14	5	6	53	55	54	65	47	54
YDL033C	46	0	8	298	165	78	149	35	56	544	461	538	734	616	747
YDL034W	4	0	0	2	2	1	2	0	0	34	23	10	29	19	38
YDL035C	253	10	40	1300	640	309	555	184	326	1762	1757	1747	1667	1559	1923
YDL036C	147	6	24	574	345	141	229	103	153	582	592	662	657	604	658
YDL037C	31	3	6	197	117	49	53	11	23	282	253	271	556	433	408
YDL039C	83	4	12	904	355	206	138	59	72	851	905	871	1329	1066	1035
YDL040C	266	10	31	2528	1708	804	974	350	617	1964	2034	2016	1745	1650	2052
YDL041W	8	1	3	180	111	85	132	54	101	41	118	115	86	59	53
YDL042C	141	11	20	354	192	72	155	48	71	743	629	707	798	852	729
YDL043C	228	12	46	317	153	70	124	34	80	322	307	314	313	343	337
YDL044C	268	17	51	893	547	240	381	141	248	613	658	641	576	579	600
YDL045C	280	15	61	394	275	124	157	61	112	338	364	382	393	375	447
YDL045W-A	97	10	19	257	201	84	143	52	95	157	171	175	250	224	267
YDL046W	191	4	33	320	308	110	133	42	96	445	292	257	504	390	497
YDL047W	73	3	9	346	188	77	111	26	51	673	576	577	621	636	695
YDL048C	550	50	46	1133	454	299	548	109	248	2280	2585	2257	1621	1304	1272
YDL049C	255	11	47	404	247	108	213	71	124	588	512	703	1068	575	948
YDL050C	117	14	54	111	56	36	46	18	41	77	41	70	112	122	152
YDL051W	758	89	170	1406	981	470	547	268	388	1077	1105	1079	1083	1167	981
YDL052C	84	5	13	223	147	48	87	19	44	400	344	368	462	468	529
YDL053C	230	15	49	1413	926	471	670	289	436	674	861	770	661	701	695
YDL054C	102	3	17	176	101	35	66	11	26	313	265	273	484	374	495
YDL055C	380	30	75	1192	551	339	582	228	485	2162	1697	1798	1596	1977	2210
YDL056W	230	25	60	1363	807	390	618	224	353	1338	1374	1309	1238	1080	1343
YDL057W	44	3	11	178	57	20	89	20	50	233	230	202	153	182	178
YDL058W	641	46	121	4572	1974	1082	1727	646	1094	2765	3085	2846	1902	1875	2538
YDL059C	67	6	17	310	148	54	107	50	79	163	178	175	157	119	154
YDL060W	432	18	53	1629	1149	544	705	333	465	2124	2408	2378	2030	2062	1738
YDL061C	334	34	66	943	685	424	1001	400	668	513	537	411	502	556	445
YDL062W	47	2	7	432	247	144	152	83	117	127	129	138	130	119	104
YDL063C	464	26	65	748	420	159	209	101	162	1147	1146	1236	1425	1539	1560
YDL064W	127	19	20	245	173	85	108	37	80	297	290	285	396	326	412
YDL065C	891	104	271	1263	566	374	652	238	478	651	783	731	544	463	490
YDL066W	138	9	15	579	317	157	204	64	134	770	681	607	658	646	947
YDL067C	220	30	51	61	40	21	31	13	29	127	73	65	125	104	119
YDL068W	49	7	8	191	118	41	95	49	60	73	72	67	64	48	86
YDL069C	60	6	31	142	103	50	89	27	68	47	51	48	125	120	114
YDL070W	605	94	122	1414	995	441	506	191	299	1738	1495	1524	1870	1676	2205
YDL071C	15	0	2	107	107	46	64	11	28	123	133	130	130	92	87
YDL072C	357	19	76	954	584	287	399	118	283	640	434	438	348	346	558
YDL073W	278	14	27	884	427	200	308	138	235	881	814	891	611	757	788
YDL074C	933	86	220	3375	2070	1099	1469	682	1048	2144	2351	2290	2052	2095	2173
YDL075W	1600	151	435	1926	1171	640	1116	633	1119	1203	1090	926	1027	1444	1104
YDL076C	370	24	61	413	345	130	247	80	154	452	474	416	329	430	406
YDL077C	79	4	13	530	254	125	250	82	147	614	709	587	261	394	436
YDL078C	580	46	124	902	585	311	528	156	383	1045	854	860	623	609	785
YDL079C	435	56	248	366	558	185	295	91	173	481	408	409	486	431	540
YDL080C	127	9	5	293	168	66	176	44	85	750	697	782	765	873	804
YDL081C	681	65	154	760	485	309	491	201	497	1174	810	700	796	981	873
YDL082W	724	48	66	1858	1167	575	841	415	705	1878	1634	1408	1289	2060	1448
YDL083C	366	35	45	406	197	101	181	67	143	380	296	284	408	612	511
YDL084W	905	69	184	1917	1162	507	658	257	477	1640	1422	1446	1310	1541	1606
YDL085C-A	61	34	61	677	373	222	462	196	268	144	186	175	83	95	150
YDL085W	37	2	5	176	92	31	255	48	125	861	519	537	260	346	524
YDL086C-A	0	0	0	0	0	0	0	0	0	0	0	0	0	0	0
YDL086W	56	3	11	423	210	83	161	50	65	460	439	367	319	259	343
YDL087C	38	1	8	222	93	42	88	22	55	440	432	431	459	376	447
YDL088C	195	16	13	1178	772	383	566	220	379	761	891	894	828	796	862
YDL089W	102	10	14	307	189	67	114	28	61	280	291	245	244	268	353
YDL090C	141	5	20	394	149	78	156	40	71	293	256	282	181	183	262
YDL091C	261	13	55	943	618	309	549	175	386	552	557	502	288	336	487
YDL092W	903	81	189	728	479	238	308	140	252	435	384	398	446	434	437
YDL093W	61	3	6	207	59	31	66	21	32	500	450	507	364	337	450
YDL094C	4	1	1	17	4	1	2	0	2	20	12	26	32	18	36
YDL095W	239	19	26	869	305	203	403	156	308	1924	1571	1818	1332	1286	1543
YDL096C	2	0	0	179	47	49	59	27	67	26	36	29	33	18	31
YDL097C	426	32	40	794	604	251	308	80	185	951	719	735	824	892	1041
YDL098C	135	40	32	322	147	79	103	37	68	243	277	275	258	296	263
YDL099W	765	63	229	1662	935	568	738	259	588	549	731	734	426	462	417
YDL100C	621	45	102	3337	1758	921	1237	486	916	1017	1008	1025	884	1088	1019
YDL101C	69	1	4	346	66	69	137	42	45	237	340	252	288	267	347
YDL102W	221	11	28	1069	381	242	365	133	217	1077	1128	1137	980	955	1089
YDL103C	111	3	8	405	180	90	136	21	73	471	452	426	363	416	456
YDL104C	86	5	21	196	88	31	101	18	48	159	177	168	120	135	163
YDL105W	46	2	6	625	125	107	202	69	125	295	329	315	265	295	340
YDL106C	190	13	38	1413	856	391	649	217	364	754	851	843	794	723	825
YDL107W	152	7	35	240	196	75	105	36	56	194	225	206	176	155	201
YDL108W	144	6	18	300	192	85	152	47	90	345	319	350	460	379	406
YDL109C	38	2	6	205	87	52	91	25	51	404	414	421	327	315	348
YDL110C	253	14	74	703	882	327	509	108	368	535	386	360	359	247	415
YDL111C	138	3	12	517	316	124	143	62	105	477	377	377	628	592	577
YDL112W	764	55	106	1108	724	275	456	167	282	2227	2277	2439	2495	2537	2416
YDL113C	183	23	41	743	625	222	369	107	247	920	741	699	767	618	1061
YDL114W-A	4	0	0	4	1	0	0	1	1	3	3	4	6	2	5
YDL114W	15	0	0	24	20	5	20	4	9	40	35	38	7	25	18
YDL115C	839	73	204	369	240	102	185	68	145	648	532	561	458	449	474
YDL116W	353	26	57	616	371	148	234	83	131	951	845	892	946	988	1065
YDL117W	119	3	13	1284	826	362	537	224	265	1140	1082	1178	1080	992	1019
YDL118W	46	1	8	71	74	32	67	19	35	60	48	51	54	36	35
YDL119C	40	4	9	66	47	19	24	5	14	66	80	53	119	85	117
YDL120W	24	2	4	93	60	25	37	17	44	85	71	75	115	137	164
YDL121C	617	90	164	1591	998	429	694	345	449	382	480	500	440	460	532
YDL122W	760	45	120	3399	2083	1023	1412	642	1102	3129	3228	3229	3356	3124	3114
YDL123W	23	1	2	134	83	43	79	17	30	273	161	189	221	184	225
YDL124W	403	37	58	1766	882	593	704	221	610	1275	672	640	824	527	1016
YDL125C	191	12	21	171	100	35	57	23	51	193	118	109	224	191	259
YDL126C	1306	72	182	3502	2053	1166	1431	448	1217	4982	3641	3569	2917	2934	3828
YDL127W	31	1	2	541	94	105	178	46	58	351	384	370	256	329	295
YDL128W	227	11	26	523	324	152	209	53	133	886	744	780	966	1098	1058
YDL129W	246	11	28	287	168	84	142	53	69	565	627	533	529	598	564
YDL130W-A	91	6	32	574	295	148	281	99	198	173	156	121	75	83	122
YDL130W	418	16	30	663	344	226	321	151	274	873	690	533	713	1003	721
YDL131W	160	15	42	1383	974	493	1002	427	675	1608	1399	1476	1224	1285	1244
YDL132W	565	20	84	1713	1052	463	701	192	429	1421	1394	1271	719	841	1160
YDL133C-A	0	0	0	0	0	0	0	0	0	0	0	0	0	0	0
YDL133W	477	17	96	589	581	172	299	115	218	962	825	876	780	690	893
YDL134C	665	26	80	1203	771	353	589	226	429	1052	846	899	1032	1275	1175
YDL135C	178	11	30	174	53	20	54	17	38	285	210	235	162	177	215
YDL136W	853	177	505	1389	739	415	662	322	577	922	708	593	813	1171	884
YDL137W	414	66	148	435	283	100	172	53	132	530	480	546	507	616	623
YDL138W	98	9	10	390	226	89	226	36	86	1128	914	1024	1431	1133	1282
YDL139C	68	3	7	596	253	147	287	83	168	312	360	295	302	237	261
YDL140C	600	28	66	1827	924	469	693	217	500	5564	4349	4767	5466	4828	5928
YDL141W	48	0	5	356	254	92	161	49	79	681	606	621	591	575	687
YDL142C	165	12	21	157	106	60	97	29	51	178	154	131	115	112	160
YDL143W	674	30	58	1346	1035	450	556	222	459	1905	1685	1721	1596	1595	1645
YDL144C	117	2	11	279	176	100	183	41	130	588	492	511	346	286	295
YDL145C	357	27	40	1602	805	460	713	226	547	3464	3174	3090	2648	2703	3143
YDL146W	89	1	8	217	181	52	100	26	46	266	226	256	269	257	350
YDL147W	1803	194	443	3112	2547	1144	1399	542	1190	1774	1695	1521	1429	1698	1870
YDL148C	2571	184	553	4202	2830	1446	1554	868	1466	2950	3394	3480	3197	3035	2934
YDL149W	145	7	16	825	458	215	542	112	287	1061	865	825	837	763	1116
YDL150W	408	33	55	941	640	335	344	165	280	1219	1321	1275	1255	1213	1056
YDL151C	14	0	0	188	157	86	127	71	54	215	243	214	137	111	90
YDL152W	59	4	13	50	26	9	14	6	13	65	84	97	40	39	25
YDL153C	3114	383	913	1106	538	274	383	150	303	1263	1215	1473	1025	1045	920
YDL154W	144	12	27	383	168	89	217	50	97	393	513	427	304	336	315
YDL155W	135	5	19	1113	645	334	639	270	450	933	1025	1035	911	830	848
YDL156W	28	2	7	362	96	86	150	40	58	657	746	725	429	396	505
YDL157C	111	22	23	143	56	31	45	10	27	118	106	117	154	167	189
YDL158C	27	3	19	92	63	45	38	16	47	45	44	47	50	34	54
YDL159C-B	0	0	0	0	0	0	0	0	0	0	0	0	0	0	0
YDL159W-A	0	0	0	0	0	0	0	0	0	0	0	0	1	0	0
YDL159W	93	3	13	441	353	128	205	63	101	451	413	439	509	399	548
YDL160C-A	13	4	0	17	7	1	10	2	1	19	12	8	26	31	35
YDL160C	304	13	48	973	585	266	420	137	313	1358	1007	1067	1036	1202	1303
YDL161W	901	17	140	1250	696	387	703	216	496	918	1090	1189	757	618	753
YDL162C	4	0	2	10	6	0	2	1	2	15	18	14	11	6	10
YDL163W	6	0	3	0	0	0	0	0	0	3	2	2	0	0	0
YDL164C	93	2	12	311	73	42	87	26	50	676	679	718	383	390	579
YDL165W	196	12	33	228	129	55	91	39	74	265	208	229	246	340	312
YDL166C	363	46	126	286	172	70	127	58	96	325	265	263	440	434	357
YDL167C	426	29	80	1343	773	364	448	193	304	1493	1807	1933	1839	1737	1615
YDL168W	201	10	31	198	124	43	98	26	42	529	358	412	312	324	362
YDL169C	51	0	11	177	186	65	158	20	84	157	136	110	109	71	137
YDL170W	21	1	7	227	85	46	61	18	37	308	280	267	478	369	544
YDL171C	528	23	52	2251	1343	584	869	282	630	4363	3984	3747	5054	5230	6218
YDL172C	84	15	50	267	239	105	139	64	102	155	161	175	118	104	141
YDL173W	128	15	15	498	348	154	226	81	146	537	533	482	713	506	695
YDL174C	707	44	72	1209	881	387	771	195	594	1835	1558	1722	2266	1773	2327
YDL175C	112	10	29	334	304	106	198	58	102	423	429	423	485	420	477
YDL176W	379	33	38	702	461	196	297	111	177	761	802	842	785	833	893
YDL177C	147	11	32	375	289	127	233	104	148	155	177	159	159	162	146
YDL178W	637	43	102	765	526	206	382	144	235	831	857	825	710	698	775
YDL179W	54	4	13	140	104	29	85	32	39	210	173	185	170	128	243
YDL180W	201	6	22	213	176	68	128	48	76	536	480	466	619	503	657
YDL181W	228	20	52	371	251	152	212	67	217	213	143	131	101	92	135
YDL182W	129	1	3	928	614	286	878	335	729	2132	1082	1382	1584	1136	1435
YDL183C	41	0	8	160	137	37	79	18	33	255	184	222	337	251	304
YDL184C	0	0	0	0	0	0	0	0	0	0	0	0	0	0	0
YDL185C-A	27	2	6	273	133	103	119	37	73	248	290	256	225	184	220
YDL185W	988	66	118	2464	1319	667	890	289	666	4928	3893	3838	3694	3583	4985
YDL186W	24	0	5	64	46	17	44	12	15	45	56	45	46	45	56
YDL187C	2	0	0	11	10	0	4	0	0	12	12	9	8	11	8
YDL188C	308	12	44	673	374	219	364	115	256	640	579	552	370	365	507
YDL189W	193	13	28	487	223	107	168	51	108	730	850	809	803	699	821
YDL190C	590	25	43	1397	804	369	609	213	397	1503	1475	1408	1122	1235	1498
YDL191W	1092	206	428	1898	901	581	914	354	790	1063	908	817	1028	1253	1095
YDL192W	554	87	124	939	505	253	366	155	268	901	977	905	1036	1304	1119
YDL193W	104	8	7	543	410	179	272	90	197	504	434	429	489	521	540
YDL194W	101	2	13	236	182	55	166	27	81	587	494	501	550	518	661
YDL195W	285	15	26	1269	589	292	506	124	323	3120	2597	2491	2391	2215	2868
YDL196W	32	0	4	66	48	20	42	3	18	43	56	45	22	32	30
YDL197C	72	2	11	665	423	182	374	81	129	804	940	789	447	412	582
YDL198C	42	0	5	80	46	14	45	10	24	205	135	141	263	181	273
YDL199C	44	2	10	182	125	38	98	15	28	305	252	208	332	335	384
YDL200C	230	41	87	346	178	98	189	50	103	188	179	204	156	187	174
YDL201W	124	10	25	640	433	199	261	92	204	739	688	624	700	706	707
YDL202W	84	6	8	413	257	150	198	73	112	428	456	444	441	377	428
YDL203C	89	8	12	307	168	87	140	43	55	738	710	751	803	687	869
YDL204W	204	10	33	1815	1413	594	1048	192	429	1084	712	502	377	553	658
YDL205C	299	14	53	428	258	113	184	69	124	819	752	710	827	595	734
YDL206W	249	15	35	414	371	105	219	54	120	602	528	497	430	392	604
YDL207W	170	11	19	996	572	307	516	187	342	713	801	765	620	546	601
YDL208W	391	37	111	1078	642	342	395	185	268	746	713	735	909	1038	845
YDL209C	183	8	23	351	214	67	126	42	54	657	675	690	589	477	507
YDL210W	37	1	7	82	68	23	50	7	17	160	110	106	526	517	619
YDL211C	51	4	7	411	116	80	134	62	64	259	308	341	382	262	250
YDL212W	676	149	208	474	424	169	206	75	145	855	641	665	964	1045	946
YDL213C	445	73	217	1069	650	294	348	184	361	721	834	815	842	760	689
YDL214C	52	1	2	180	156	43	96	18	43	325	315	277	422	398	418
YDL215C	554	20	64	511	435	129	303	57	151	1188	853	912	1263	1461	1656
YDL216C	128	4	29	437	236	86	250	45	137	288	288	279	233	162	261
YDL217C	41	1	6	32	24	9	13	4	4	175	119	108	190	153	175
YDL218W	17	5	4	103	64	11	81	12	25	138	126	122	91	119	89
YDL219W	139	24	28	375	144	76	86	44	52	136	147	151	79	112	137
YDL220C	50	1	2	282	103	40	115	33	77	783	675	787	554	504	659
YDL221W	19	2	2	66	36	11	34	14	14	126	118	108	70	62	81
YDL222C	20	3	3	49	47	18	54	10	27	244	122	90	100	85	150
YDL223C	101	2	9	1623	882	455	1189	219	423	3248	2499	2011	765	1155	1158
YDL224C	36	3	8	252	127	46	92	25	36	601	586	533	625	551	742
YDL225W	409	23	88	801	390	194	285	116	239	1037	1030	1021	997	970	998
YDL226C	81	6	12	529	281	129	219	74	126	584	668	653	527	545	645
YDL227C	18	1	3	30	32	4	21	2	5	65	77	62	98	117	90
YDL228C	482	30	61	586	355	185	233	95	255	862	506	500	596	656	607
YDL229W	298	17	5	1052	736	291	400	153	272	2730	1794	1776	2315	2826	2279
YDL230W	81	2	9	206	129	51	102	30	78	241	225	191	188	176	217
YDL231C	172	13	25	581	266	97	164	62	112	1508	1154	1230	1784	1428	1968
YDL232W	2	1	1	9	3	1	4	1	2	8	3	6	13	9	12
YDL233W	39	5	13	314	249	83	154	31	81	420	402	398	613	459	665
YDL234C	262	18	44	547	414	169	312	115	219	1208	866	824	1412	1016	1985
YDL235C	197	16	37	257	112	68	87	43	70	259	185	196	276	280	294
YDL236W	367	30	51	280	156	61	84	23	65	505	421	411	567	576	590
YDL237W	69	1	8	298	143	50	78	18	53	451	395	365	447	392	590
YDL238C	33	3	4	128	84	33	54	10	38	288	224	200	230	163	362
YDL239C	95	5	21	399	268	104	162	28	105	420	346	310	246	218	419
YDL240C-A	5	0	1	3	1	0	3	0	1	2	3	1	2	1	1
YDL240W	57	1	14	634	345	148	230	61	110	646	695	670	672	598	742
YDL241W	3	0	0	33	17	4	4	2	5	16	17	20	17	11	26
YDL242W	6	0	1	10	6	4	4	1	5	8	11	18	9	15	12
YDL243C	88	5	8	82	63	30	53	15	29	136	117	116	87	79	110
YDL244W	16	0	3	33	17	3	23	9	13	12	16	16	5	15	13
YDL245C	56	1	4	167	114	25	111	21	39	187	214	206	138	124	118
YDL246C	13	0	3	46	0	0	0	4	5	22	20	10	29	12	12
YDL247W-A	0	0	0	0	0	0	0	0	0	0	0	0	0	0	0
YDL247W	54	0	8	116	72	0	133	0	0	218	257	244	221	173	156
YDL248W	199	6	20	302	184	60	98	36	80	288	231	214	401	263	498
YDR001C	338	9	32	960	586	271	518	129	312	2204	1546	1569	2225	1620	2576
YDR002W	1564	335	554	2078	1550	832	1021	468	862	1145	1190	1143	1723	1762	1532
YDR003W-A	7	0	0	7	3	1	4	0	1	30	14	19	22	16	30
YDR003W	161	12	12	397	345	122	235	70	150	584	424	471	472	408	515
YDR004W	383	21	61	521	276	123	258	83	118	527	533	550	464	426	499
YDR005C	446	48	115	272	185	61	118	39	74	436	331	347	562	503	673
YDR006C	298	29	48	1005	566	264	337	92	175	1960	1965	2002	2537	2120	2500
YDR007W	145	11	16	529	403	162	213	64	105	443	375	429	487	305	393
YDR008C	175	11	57	157	141	60	69	12	69	117	74	58	187	76	118
YDR009W	49	2	4	103	79	20	55	13	30	232	163	192	357	255	337
YDR010C	4	0	0	15	12	2	13	2	6	21	19	16	24	16	19
YDR011W	473	29	41	1785	1789	605	763	209	458	5082	3515	3781	5983	4996	5800
YDR012W	466	24	27	641	359	154	364	117	266	1685	1093	1096	1055	1546	1188
YDR013W	107	8	14	129	50	12	37	12	23	219	186	166	229	331	276
YDR014W-A	11	0	0	85	40	6	48	12	21	26	35	26	31	30	30
YDR014W	194	12	27	771	309	159	271	102	158	472	584	534	580	539	664
YDR015C	1	0	0	0	0	6	0	0	0	0	3	0	0	0	0
YDR016C	48	7	13	60	35	11	32	11	30	28	23	19	40	31	49
YDR017C	437	40	88	1858	1318	567	788	269	455	2366	2436	2625	2962	2226	2983
YDR018C	55	0	9	101	65	22	69	16	21	137	94	75	127	90	142
YDR019C	120	6	25	476	264	135	400	153	183	637	874	577	591	553	842
YDR020C	194	13	49	387	208	106	158	69	110	307	342	376	354	319	363
YDR021W	504	26	77	1053	543	301	384	185	261	657	805	779	1037	1014	930
YDR022C	60	4	19	679	326	241	447	197	339	191	210	189	160	201	144
YDR023W	1185	94	227	1834	957	521	668	300	543	1565	1480	1362	1220	1567	1479
YDR024W	9	0	0	17	14	8	13	7	5	32	28	28	22	34	30
YDR025W	419	33	71	1917	2015	1060	1847	633	951	1341	1354	1114	839	1277	1044
YDR026C	385	17	66	1388	796	394	624	227	410	1219	1463	1464	1171	1041	1111
YDR027C	366	21	45	832	450	225	361	120	257	1162	1236	1116	939	828	1066
YDR028C	375	13	64	2607	1273	776	1190	395	768	3255	3401	3339	3767	3018	4150
YDR029W	19	1	4	229	113	59	85	27	53	154	186	169	248	168	255
YDR030C	182	3	27	138	64	28	63	14	29	300	305	287	243	256	339
YDR031W	141	19	72	150	91	39	64	17	45	85	52	43	52	57	92
YDR032C	73	1	9	107	41	25	28	5	12	167	75	65	88	69	146
YDR033W	866	37	160	2792	1108	738	1162	452	811	2080	1964	1968	1106	2339	1595
YDR034C-A	90	23	39	86	52	38	56	27	59	107	91	65	133	136	179
YDR034C	285	15	34	1522	796	402	650	271	375	1310	1470	1427	1583	1425	1708
YDR034W-B	7	3	3	55	40	13	17	2	4	33	10	7	50	16	51
YDR035W	313	18	44	1036	763	355	343	120	245	1104	876	923	1842	1209	1862
YDR036C	55	5	7	440	217	87	140	44	96	495	471	443	907	615	911
YDR037W	1043	93	140	1828	1176	559	763	308	596	3299	2575	2537	3748	2989	3512
YDR038C	200	0	26	480	390	108	224	76	158	1543	1281	1190	2426	1802	2365
YDR039C	447	60	133	702	335	183	409	110	270	1816	1765	1810	1490	1338	1422
YDR040C	420	15	31	523	1348	398	409	93	252	2194	1435	1424	2806	2790	3164
YDR041W	240	28	77	362	261	103	187	61	120	345	340	341	438	354	451
YDR042C	72	7	8	271	174	75	96	33	59	120	128	141	101	165	98
YDR043C	341	25	124	1411	834	463	749	375	589	652	757	719	1062	1010	1048
YDR044W	135	11	17	846	274	200	408	131	218	876	895	967	647	455	840
YDR045C	275	53	63	436	271	137	211	90	144	271	267	311	256	341	284
YDR046C	281	19	43	583	323	195	227	94	170	1023	862	864	926	911	1072
YDR047W	104	10	14	201	73	37	62	13	36	490	383	352	322	288	338
YDR048C	4	0	1	30	11	6	12	5	7	48	63	56	66	35	41
YDR049W	214	20	30	997	552	284	404	169	253	1170	1175	1204	1069	875	966
YDR050C	745	41	83	1405	570	377	455	180	431	1614	957	1073	1134	1066	1536
YDR051C	922	143	283	857	533	256	451	146	291	744	734	782	633	631	591
YDR052C	214	12	52	2981	1376	844	1179	557	743	1750	2015	1880	1553	1201	1349
YDR053W	0	0	0	9	7	0	0	0	0	26	10	26	26	12	10
YDR054C	180	12	41	1458	1022	465	561	248	414	1156	1096	1081	1441	1333	1432
YDR055W	104	4	12	281	94	46	184	34	77	1243	570	724	1774	1636	2243
YDR056C	1180	90	356	1558	1268	608	894	369	896	862	865	875	1092	1047	1183
YDR057W	393	31	69	740	397	174	291	93	183	791	814	849	697	571	762
YDR058C	299	25	76	196	103	45	101	30	67	302	236	204	278	285	320
YDR059C	53	1	4	51	37	14	23	5	7	115	47	72	124	138	153
YDR060W	1120	163	369	5157	2748	1440	1627	831	1232	4060	4454	4544	4237	4071	3960
YDR061W	279	10	37	678	422	179	350	151	233	949	903	909	988	823	1051
YDR062W	302	24	32	1026	653	263	403	170	305	1722	1466	1468	1226	1477	1440
YDR063W	253	14	58	521	300	170	319	154	233	130	141	89	83	90	105
YDR064W	1387	108	281	1481	812	438	739	327	743	2007	1377	1161	1690	2584	1716
YDR065W	65	2	18	324	182	72	120	44	68	408	508	448	377	472	464
YDR066C	66	5	15	61	31	11	33	5	20	79	71	70	80	121	128
YDR067C	302	19	93	548	422	205	388	191	333	264	258	220	260	278	323
YDR068W	499	88	251	796	391	163	347	106	270	399	509	459	241	283	311
YDR069C	168	6	35	460	279	116	192	60	135	588	512	493	573	506	806
YDR070C	59	4	27	984	354	317	853	255	501	348	243	218	89	134	137
YDR071C	303	38	105	948	759	342	502	209	380	492	529	442	385	507	512
YDR072C	337	19	39	547	466	130	268	92	145	1509	1052	1264	2312	1365	2130
YDR073W	133	22	49	466	455	221	247	106	199	308	282	266	487	327	445
YDR074W	680	23	71	1723	1931	718	1083	359	697	2787	1929	1548	2141	1431	2849
YDR075W	293	21	63	239	153	69	80	28	46	393	370	444	618	466	503
YDR076W	75	5	9	252	124	59	91	23	35	236	269	292	303	250	323
YDR077W	3437	488	778	5220	4024	2359	4655	1558	2497	12743	12245	10356	11523	10306	9177
YDR078C	158	19	40	240	208	65	104	33	66	162	175	155	197	183	215
YDR079C-A	112	22	20	119	75	34	48	14	35	56	73	68	66	78	75
YDR079W	211	31	79	236	168	73	76	28	51	153	121	106	165	167	210
YDR080W	336	10	74	646	375	140	244	86	151	740	736	690	508	554	629
YDR081C	260	15	31	820	406	197	252	92	176	975	1022	988	1141	1066	1158
YDR082W	206	6	22	275	126	49	111	34	56	365	362	358	418	408	456
YDR083W	651	72	173	1804	1193	557	623	317	529	1318	1369	1400	1261	1332	1177
YDR084C	114	3	17	306	199	106	193	50	128	190	155	140	163	182	205
YDR085C	98	4	16	426	360	125	395	76	132	565	398	360	395	392	547
YDR086C	206	51	91	601	337	185	264	129	161	303	321	287	317	393	335
YDR087C	977	114	287	1660	1103	541	687	438	523	959	1175	1182	1062	1141	966
YDR088C	616	69	171	787	491	214	370	127	236	694	721	743	778	627	664
YDR089W	81	5	14	359	211	82	215	69	119	605	555	524	553	572	662
YDR090C	123	4	10	275	188	62	112	26	62	430	383	383	564	515	605
YDR091C	494	18	25	1129	641	286	361	162	227	1503	1225	1301	1396	1827	1472
YDR092W	121	10	9	463	287	191	258	103	210	218	182	209	344	293	343
YDR093W	163	7	13	1406	701	336	581	165	379	3748	3250	3827	4580	3622	4100
YDR094W	20	2	1	60	25	24	47	19	27	39	35	21	59	65	66
YDR095C	4	0	0	7	4	1	5	0	1	18	11	18	34	16	28
YDR096W	186	15	27	618	864	267	353	70	150	907	641	587	992	714	1120
YDR097C	214	8	11	1399	282	255	457	141	236	1497	1760	1659	999	1083	1423
YDR098C	280	25	64	461	279	115	139	51	137	368	344	311	357	394	404
YDR099W	451	24	107	1805	1204	627	847	329	622	1168	1120	991	863	780	1057
YDR100W	80	3	8	98	79	30	48	12	21	117	82	99	93	81	138
YDR101C	439	40	87	758	447	197	240	90	174	1519	1368	1362	2003	2106	1782
YDR102C	8	0	2	27	22	7	8	7	3	27	28	37	24	34	35
YDR103W	132	5	19	306	194	76	110	20	32	466	424	421	326	397	415
YDR104C	267	8	31	868	476	205	386	109	197	1335	1275	1233	1293	1031	1347
YDR105C	92	3	6	263	185	62	76	21	61	424	359	321	439	425	553
YDR106W	29	0	12	71	67	11	39	6	13	46	50	44	84	66	89
YDR107C	77	7	13	484	225	95	226	56	93	423	370	391	303	272	418
YDR108W	275	15	29	805	522	256	382	162	270	484	539	500	451	427	494
YDR109C	154	4	8	354	169	71	193	74	121	611	523	502	310	342	372
YDR110W	373	53	67	534	210	124	202	93	141	740	845	892	820	830	805
YDR111C	85	6	3	237	103	42	63	26	31	509	385	448	571	488	617
YDR112W	13	5	4	92	58	26	47	13	23	107	121	123	121	89	101
YDR113C	70	4	8	1045	281	307	589	203	258	538	738	661	538	563	477
YDR114C	6	3	2	95	66	17	35	28	25	14	25	21	18	26	10
YDR115W	170	34	51	291	177	80	122	48	109	183	192	179	240	251	255
YDR116C	148	10	27	1147	946	419	694	244	432	575	644	599	617	507	649
YDR117C	243	14	32	587	380	137	249	73	148	641	587	590	631	630	662
YDR118W-A	2	0	0	0	3	1	2	1	0	3	5	12	9	2	5
YDR118W	158	7	28	314	172	66	153	46	78	426	367	395	312	347	376
YDR119W-A	686	47	127	380	496	206	245	81	234	147	88	88	167	130	181
YDR119W	495	17	63	873	550	264	393	163	271	1757	1627	1651	1248	1577	1389
YDR120C	354	23	51	570	285	130	175	78	113	1145	1210	1246	1232	1223	1099
YDR121W	231	7	40	1054	646	363	525	217	421	521	628	607	649	618	580
YDR122W	228	10	30	1123	817	325	637	100	375	2365	1906	1907	2118	1515	2800
YDR123C	122	2	13	793	500	222	397	176	243	634	663	719	1663	727	1260
YDR124W	64	3	5	112	127	24	42	10	25	191	165	190	392	174	384
YDR125C	101	7	18	219	123	42	87	17	42	223	186	193	281	218	297
YDR126W	117	6	10	405	227	105	141	53	60	316	319	336	495	456	505
YDR127W	280	8	20	1432	651	324	456	92	232	2703	2324	2145	2845	2304	3586
YDR128W	267	17	34	678	446	173	287	72	162	1450	1432	1481	1415	1267	1615
YDR129C	599	41	100	984	696	288	388	124	294	1924	1503	1481	2098	1940	2731
YDR130C	92	3	18	387	147	93	178	66	123	390	372	377	467	384	466
YDR131C	131	6	14	240	108	36	68	25	45	233	206	192	169	194	245
YDR132C	170	2	29	324	185	67	112	30	50	329	286	299	558	392	604
YDR133C	236	19	109	581	502	205	133	65	162	140	85	83	276	273	340
YDR135C	430	18	47	1283	768	326	439	127	255	3400	2832	2863	3035	2812	3903
YDR136C	23	0	1	71	49	25	28	16	23	44	50	42	53	45	52
YDR137W	357	13	45	584	278	112	197	58	102	599	613	608	488	468	654
YDR138W	190	8	32	1366	803	400	578	217	358	1218	1279	1246	905	812	954
YDR139C	261	75	169	187	150	72	95	37	69	117	116	116	146	128	185
YDR140W	94	4	10	442	240	113	155	69	118	345	339	351	346	365	380
YDR141C	229	15	25	1447	745	333	555	153	294	2075	1943	1971	1826	1644	2308
YDR142C	96	3	12	219	142	47	88	28	40	366	293	308	411	354	440
YDR143C	94	4	9	857	665	292	489	185	215	1259	1377	1399	1541	1234	1290
YDR144C	75	2	4	315	117	55	119	36	77	454	441	495	318	311	384
YDR145W	367	20	56	2155	1187	643	872	358	565	1304	1685	1499	1374	1215	1291
YDR146C	32	0	6	104	112	37	148	54	91	101	189	135	288	233	240
YDR147W	131	7	19	394	193	79	122	66	91	522	501	531	718	657	793
YDR148C	154	5	21	524	481	159	256	67	133	773	550	524	418	475	652
YDR149C	19	2	9	546	354	168	247	72	159	310	419	405	452	229	363
YDR150W	366	20	46	2904	1853	773	1309	364	790	4676	4129	4049	4068	3656	5500
YDR151C	144	3	17	636	556	202	362	144	217	492	447	465	515	496	502
YDR152W	1037	97	317	1645	1295	638	888	397	688	1122	1256	1279	1073	1063	925
YDR153C	296	21	47	1854	1265	617	817	326	496	1419	1511	1523	1325	1306	1279
YDR154C	81	7	6	233	70	65	84	17	31	134	72	84	95	76	149
YDR155C	324	16	28	882	329	274	312	111	228	785	503	426	466	389	616
YDR156W	31	1	8	202	128	61	76	23	37	279	197	209	330	313	309
YDR157W	3	0	3	8	5	0	1	1	2	30	20	25	20	14	27
YDR158W	131	9	19	1616	865	522	608	204	380	541	472	437	461	325	511
YDR159W	264	21	40	1659	913	442	614	220	383	1717	1703	1764	1542	1253	1803
YDR160W	193	11	52	533	312	142	266	90	191	1064	952	1004	969	892	1104
YDR161W	369	17	33	415	310	123	137	57	107	798	719	800	810	865	724
YDR162C	501	31	120	1182	840	485	688	262	486	456	546	520	374	342	354
YDR163W	455	88	255	468	283	160	255	93	217	223	285	288	246	199	203
YDR164C	118	6	15	440	272	113	172	51	80	566	535	519	457	422	637
YDR165W	468	22	69	1007	566	281	333	168	229	954	1042	1008	1121	1240	1169
YDR166C	140	4	23	639	343	142	230	60	129	918	875	852	944	1040	1273
YDR167W	527	94	163	644	292	151	224	72	145	356	429	423	378	431	387
YDR168W	557	94	184	1269	770	399	550	240	507	847	837	755	650	657	823
YDR169C-A	2	0	0	2	5	1	3	0	0	5	3	3	6	5	8
YDR169C	169	14	27	788	732	274	483	121	281	1185	1219	996	1161	886	1292
YDR170C	792	50	122	3331	1729	922	1453	525	977	4131	4003	4044	4126	3482	4674
YDR171W	236	8	29	1202	934	416	988	198	541	1318	948	959	737	1148	1096
YDR172W	1115	63	120	2770	2133	1023	1166	522	773	3247	3399	3298	3195	3361	3155
YDR173C	148	10	15	256	273	83	172	49	91	307	298	276	201	159	268
YDR174W	191	14	37	960	654	290	413	177	243	1102	949	886	968	1209	1049
YDR175C	223	5	38	606	434	182	320	131	249	552	534	543	477	473	506
YDR176W	262	23	49	1233	620	353	624	213	373	1142	1274	1217	773	766	882
YDR177W	1143	157	283	1060	763	331	441	164	328	615	541	515	447	577	516
YDR178W	72	1	7	74	29	21	42	11	27	101	54	43	68	73	95
YDR179C	69	22	29	380	137	63	105	62	59	133	178	161	108	209	144
YDR179W-A	103	14	21	149	44	28	58	18	33	198	168	185	290	319	360
YDR180W	242	14	31	1193	296	227	310	107	148	1080	1135	1225	1234	1265	1353
YDR181C	160	10	23	732	418	188	312	132	161	470	531	487	391	299	385
YDR182W-A	9	0	1	6	3	0	3	0	0	5	17	7	11	16	12
YDR182W	161	8	27	601	380	181	297	105	197	795	811	698	779	700	851
YDR183C-A	72	12	23	36	17	5	13	10	8	36	28	30	59	68	76
YDR183W	236	14	50	400	237	119	195	84	125	223	231	192	218	186	199
YDR184C	664	76	201	1681	979	508	665	391	493	777	978	989	1189	1121	1045
YDR185C	182	13	23	180	139	46	112	32	62	271	203	198	309	289	299
YDR186C	392	35	63	2022	809	525	1085	378	711	3348	3554	3710	3304	2439	3410
YDR187C	21	5	6	37	11	4	15	5	7	94	99	109	84	55	45
YDR188W	299	18	29	532	345	144	249	76	167	1934	1443	1561	1724	1716	1650
YDR189W	248	27	33	1031	508	283	416	135	285	997	1047	1013	896	798	1019
YDR190C	808	84	220	1946	1054	567	783	380	594	2155	2249	2243	2097	2178	1916
YDR191W	99	4	5	189	55	27	55	14	24	264	231	206	321	334	345
YDR192C	41	1	4	269	155	69	103	32	75	367	374	381	396	334	399
YDR193W	4	2	0	39	32	14	18	3	5	49	44	57	76	41	50
YDR194C	1168	133	212	2966	2341	1010	1046	450	768	2245	2202	2234	2441	2247	2528
YDR194W-A	1	0	0	2	2	0	0	0	0	3	1	0	0	0	0
YDR195W	147	5	27	500	274	113	177	51	81	495	429	443	535	597	528
YDR196C	388	44	145	304	194	97	155	40	113	275	245	250	203	161	246
YDR197W	178	7	37	316	237	61	115	40	70	301	251	237	285	222	318
YDR198C	183	15	24	438	229	97	138	61	95	472	518	521	447	512	433
YDR199W	34	19	19	158	90	48	90	39	76	71	67	55	50	49	67
YDR200C	119	10	16	671	382	157	239	73	159	460	531	524	495	377	546
YDR201W	237	34	71	427	257	112	230	100	163	178	185	189	150	134	165
YDR202C	187	4	35	265	152	52	114	21	67	233	209	164	165	153	245
YDR203W	22	0	0	36	27	19	26	7	12	33	33	32	43	23	36
YDR204W	95	0	11	578	326	158	270	79	152	451	386	313	298	234	450
YDR205W	88	7	10	374	243	96	171	49	76	533	455	507	557	478	553
YDR206W	194	8	14	578	249	140	200	71	130	1400	1135	1223	1132	1299	1271
YDR207C	143	16	31	1147	563	279	474	137	246	1156	1055	1206	1327	1008	1125
YDR208W	331	15	42	1409	948	448	667	244	394	1510	1434	1434	1564	1493	1762
YDR209C	89	15	16	123	64	29	39	4	32	89	91	88	206	212	224
YDR210W	5	2	24	28	19	6	11	2	20	16	4	4	27	4	9
YDR211W	712	33	96	1574	909	397	559	239	405	1828	1931	1880	1774	1891	1770
YDR212W	701	33	77	1758	1408	544	631	234	366	1743	1535	1625	1442	1684	1586
YDR213W	132	9	27	1348	490	303	645	210	395	1737	1898	2044	2355	1605	2353
YDR214W	77	7	16	1080	464	325	536	137	250	766	613	573	552	451	731
YDR215C	2	0	0	4	1	6	3	1	3	56	34	32	57	38	68
YDR216W	162	8	34	295	460	88	274	55	138	1384	969	953	1828	1269	1931
YDR217C	267	13	33	1508	584	319	532	160	287	1704	1919	1945	1982	1499	1739
YDR218C	12	4	10	37	25	4	24	10	13	48	68	65	37	48	41
YDR219C	120	5	26	571	319	160	205	67	119	465	509	524	563	601	629
YDR220C	0	0	0	11	5	0	7	1	1	1	8	6	5	7	5
YDR221W	125	8	11	911	417	229	390	133	213	1057	1185	1089	828	770	920
YDR222W	55	2	6	687	124	156	204	81	111	535	469	467	289	451	289
YDR223W	133	3	19	299	128	77	306	48	127	413	369	419	521	459	508
YDR224C	184	7	22	179	110	49	156	47	147	211	221	162	326	419	303
YDR225W	852	43	112	1304	1006	512	1150	541	763	975	1215	895	1086	1328	1276
YDR226W	189	10	28	1427	686	414	658	276	524	806	661	643	576	546	681
YDR227W	219	15	32	1536	822	382	565	206	316	1612	1679	1683	1535	1614	1810
YDR228C	331	17	41	1457	942	426	519	192	277	750	893	835	515	574	568
YDR229W	191	2	20	573	456	196	397	126	203	741	739	638	439	341	505
YDR230W	53	1	6	52	30	14	36	10	19	61	52	38	56	49	91
YDR231C	55	3	3	89	61	25	36	19	20	192	134	167	143	105	173
YDR232W	247	22	29	1019	787	339	494	149	320	2020	1589	1819	2343	1923	2023
YDR233C	380	35	52	1503	820	506	741	281	379	1715	1493	1468	1583	1685	1566
YDR234W	142	6	21	362	218	79	226	71	135	1460	1080	1200	1085	1214	958
YDR235W	330	30	75	446	278	104	184	67	114	487	444	440	553	546	610
YDR236C	194	12	53	321	180	90	155	48	94	295	270	281	221	215	218
YDR237W	133	9	28	184	130	45	64	23	51	332	262	230	340	275	374
YDR238C	244	16	26	1542	920	419	585	223	412	2307	2033	1972	1906	1960	2364
YDR239C	119	6	14	711	356	162	270	76	134	893	937	898	1120	944	1209
YDR240C	283	10	31	1019	555	291	443	172	250	595	622	608	822	665	747
YDR241W	17	6	6	87	55	33	57	23	41	38	46	57	47	50	49
YDR242W	67	1	12	152	70	27	51	14	38	415	376	375	626	562	685
YDR243C	137	13	42	515	320	154	183	82	108	590	662	672	700	486	579
YDR244W	157	6	25	1007	839	372	439	155	338	744	806	831	956	666	958
YDR245W	493	31	78	970	706	268	422	191	270	1190	1277	1213	1308	1229	1186
YDR246W-A	15	0	0	36	31	7	26	9	14	26	27	19	20	9	13
YDR246W	85	4	18	851	656	293	443	152	242	403	456	449	413	383	408
YDR247W	77	5	9	267	154	48	120	24	61	373	342	289	341	325	383
YDR248C	124	15	24	177	83	36	70	25	38	129	114	97	119	117	172
YDR249C	127	3	16	150	75	33	55	21	26	181	162	158	293	291	317
YDR250C	1	0	0	8	0	2	2	0	0	6	5	12	5	5	4
YDR251W	201	7	24	1078	769	291	479	139	255	1172	1022	997	1015	816	1333
YDR252W	17	0	3	147	64	30	59	13	23	79	80	82	63	64	81
YDR253C	22	0	6	113	71	25	67	16	20	47	43	38	62	42	52
YDR254W	113	8	21	117	76	22	53	10	37	208	181	183	168	159	308
YDR255C	127	4	48	523	403	148	353	69	231	381	347	341	351	288	544
YDR256C	91	2	15	98	49	20	64	14	36	471	319	342	314	348	431
YDR257C	318	14	58	588	377	147	175	74	91	793	681	798	611	733	689
YDR258C	200	10	20	1476	697	371	974	192	559	1820	1190	1166	916	1285	1598
YDR259C	42	3	9	297	188	68	98	32	44	128	135	141	141	141	131
YDR260C	148	1	18	231	132	78	122	42	68	301	281	288	364	272	288
YDR261C	45	3	3	386	194	99	174	60	91	483	495	482	376	288	505
YDR262W	157	4	17	268	285	79	131	34	63	717	533	532	660	733	850
YDR263C	26	0	1	71	43	12	27	9	12	230	175	180	164	275	229
YDR264C	202	7	11	580	446	140	318	103	174	1431	1244	1229	1250	1336	1415
YDR265W	87	6	8	231	127	50	105	24	62	364	305	307	339	374	393
YDR266C	208	17	28	667	311	149	210	68	168	1135	986	970	1219	1338	1383
YDR267C	489	14	79	364	175	80	161	55	92	427	365	398	429	380	357
YDR268W	46	4	5	135	66	21	40	8	15	151	161	163	173	178	181
YDR269C	0	0	0	19	24	3	13	3	1	37	41	49	40	32	38
YDR270W	109	4	12	285	213	69	202	47	127	1094	727	774	930	939	1050
YDR271C	25	1	2	30	22	12	25	7	3	30	13	25	23	48	50
YDR272W	547	80	167	576	289	151	274	96	210	701	554	589	509	503	649
YDR273W	67	4	13	179	148	52	105	18	58	266	257	223	189	162	171
YDR274C	93	16	50	127	53	29	87	27	37	259	234	278	309	187	207
YDR275W	510	71	199	1082	329	227	314	128	173	770	771	802	816	706	865
YDR276C	252	30	74	105	87	38	64	21	53	249	129	112	311	215	357
YDR277C	135	8	23	561	859	280	598	184	278	629	542	362	959	620	1297
YDR278C	206	76	209	6155	3087	3771	7253	3079	12504	316	461	362	261	278	349
YDR279W	86	7	17	144	45	26	38	12	27	207	191	164	232	208	256
YDR280W	771	47	185	1076	748	324	492	201	281	735	754	740	706	697	691
YDR281C	294	70	165	271	59	49	145	102	113	65	73	69	171	128	165
YDR282C	189	11	30	211	126	46	92	27	43	289	207	242	266	212	288
YDR283C	396	21	49	1096	604	241	381	123	228	1961	1845	1894	1952	1878	2272
YDR284C	310	16	41	260	158	66	127	27	70	347	258	242	237	234	319
YDR285W	265	32	93	1183	711	277	344	129	219	457	499	523	329	394	394
YDR286C	72	8	15	73	44	18	24	11	18	50	42	34	51	55	68
YDR287W	58	2	7	187	118	44	87	22	54	299	228	237	187	176	210
YDR288W	498	66	143	428	332	116	205	58	134	365	374	370	432	449	497
YDR289C	426	51	112	777	445	218	322	105	233	682	722	762	628	559	598
YDR290W	8	0	2	34	14	6	14	5	2	41	45	44	34	33	36
YDR291W	274	14	40	1208	563	261	460	138	288	1603	1532	1668	1718	1500	1822
YDR292C	385	15	53	598	286	137	205	71	133	870	964	914	1053	891	1060
YDR293C	473	18	38	1561	1074	465	776	218	489	3197	2454	2206	3696	2624	4789
YDR294C	337	17	33	1043	726	330	527	183	402	1340	1344	1276	1512	1342	1687
YDR295C	74	7	9	835	458	197	229	92	97	566	639	588	565	689	587
YDR296W	74	2	7	256	141	49	114	34	65	427	370	370	499	421	453
YDR297W	202	16	44	657	403	175	216	98	134	769	786	888	1457	1047	1427
YDR298C	123	4	8	212	153	54	116	37	77	426	263	300	268	282	344
YDR299W	1477	67	185	1987	1106	587	764	366	532	1460	1623	1785	1437	1607	1319
YDR300C	247	7	28	498	302	116	205	72	155	719	677	727	904	958	900
YDR301W	226	12	34	1135	694	302	456	136	291	1771	1704	1808	1477	1346	1754
YDR302W	242	38	58	147	106	49	69	31	40	189	192	201	252	237	252
YDR303C	304	36	52	883	720	281	338	141	190	926	913	946	1024	1052	1218
YDR304C	479	41	108	876	480	293	369	131	296	696	676	646	614	572	721
YDR305C	148	6	13	149	117	26	83	19	31	180	136	145	140	132	144
YDR306C	362	18	115	318	285	95	157	37	70	462	389	342	490	407	625
YDR307W	147	12	21	375	162	76	141	51	97	439	459	434	322	324	459
YDR308C	187	25	72	658	374	210	311	139	190	199	269	241	241	204	287
YDR309C	34	3	15	314	57	49	91	35	29	213	300	258	444	512	416
YDR310C	205	14	18	1195	594	311	521	127	260	1770	2018	1956	1734	1442	1601
YDR311W	428	44	118	1207	720	344	612	264	435	795	907	856	742	811	887
YDR312W	575	58	159	1249	679	357	481	257	339	878	990	1036	1080	960	939
YDR313C	192	7	35	582	376	157	295	108	204	483	433	414	400	338	480
YDR314C	52	5	15	463	275	121	191	46	101	571	599	605	647	604	793
YDR315C	81	16	30	147	76	27	49	19	18	115	108	111	86	82	142
YDR316W	392	33	101	522	319	138	237	65	149	431	432	424	287	217	288
YDR317W	75	6	11	236	110	52	89	28	37	206	223	232	194	211	184
YDR318W	188	20	50	531	374	164	291	101	163	294	339	314	227	179	265
YDR319C	97	4	19	45	41	11	21	4	12	106	75	78	107	109	143
YDR320C-A	58	15	22	50	32	19	25	9	21	45	42	43	66	66	74
YDR320C	96	6	13	508	323	142	228	68	113	765	745	729	616	530	674
YDR320W-B	1	0	0	3	1	0	2	0	0	0	0	0	0	0	2
YDR321W	168	11	19	600	461	182	220	95	142	689	648	671	687	781	743
YDR322C-A	494	132	272	272	169	77	114	34	89	182	97	130	177	179	186
YDR322W	81	1	17	214	150	43	94	24	63	277	219	235	404	354	423
YDR323C	159	11	22	755	341	161	284	104	169	372	398	410	350	359	402
YDR324C	698	50	130	1910	1186	569	761	392	564	2118	2143	2254	2335	2495	2282
YDR325W	230	11	38	987	423	210	408	176	276	1174	1298	1387	1343	1313	1184
YDR326C	381	23	32	1524	952	406	552	208	349	2376	2495	2401	3188	2961	3860
YDR327W	150	23	29	101	55	29	35	13	25	104	61	71	145	138	165
YDR328C	663	151	253	728	421	261	314	129	307	703	618	593	937	823	872
YDR329C	479	19	96	897	688	280	487	157	353	724	648	629	565	549	745
YDR330W	196	9	15	779	732	264	427	101	257	791	581	571	477	409	648
YDR331W	143	9	14	331	148	72	100	38	69	415	402	393	577	519	601
YDR332W	141	8	20	716	394	162	275	80	143	678	673	667	766	640	768
YDR333C	340	15	33	993	614	285	472	162	237	1336	1107	1178	1321	1236	1348
YDR334W	596	30	102	2740	1837	829	1095	306	813	3344	3186	3446	3827	2598	3916
YDR335W	329	24	84	1023	578	240	388	128	292	1522	1243	1370	1147	1117	1630
YDR336W	462	76	129	288	195	71	143	49	96	339	312	353	416	375	394
YDR337W	231	19	43	777	439	194	297	92	193	494	477	481	441	418	520
YDR338C	285	16	37	589	308	152	348	102	177	1029	991	1011	1149	1027	1185
YDR339C	256	39	96	573	441	222	322	178	306	260	249	239	422	524	415
YDR340W	47	2	10	44	34	11	34	9	21	40	36	57	57	46	53
YDR341C	592	13	46	848	665	228	263	123	233	1573	1315	1298	1338	1535	1509
YDR342C	3577	148	648	1556	2222	963	972	606	1139	812	329	643	1487	853	1452
YDR343C	301	33	88	404	0	0	589	0	244	487	394	0	415	261	788
YDR344C	4	0	1	47	25	8	23	4	10	101	140	121	227	199	199
YDR345C	219	57	19	522	365	150	279	99	277	2329	1427	1236	2969	2592	2234
YDR346C	1705	102	298	1504	1305	533	723	332	528	1683	1695	1791	1875	1786	1585
YDR347W	74	7	6	207	145	46	77	17	36	356	343	357	613	376	574
YDR348C	228	8	24	1063	474	275	493	180	245	1061	1197	1153	1055	831	906
YDR349C	189	8	15	460	273	128	206	78	118	1011	981	1042	1318	1171	1295
YDR350C	299	18	43	976	652	265	484	152	298	983	941	944	931	811	1088
YDR351W	305	25	61	1664	938	444	641	265	463	1720	1741	1754	1862	1626	1940
YDR352W	129	4	13	209	88	31	88	27	59	325	289	306	392	385	456
YDR353W	340	19	43	1076	708	327	465	152	300	1053	956	900	1358	1099	1378
YDR354C-A	0	0	0	0	0	0	0	0	0	0	0	0	0	0	0
YDR354W	136	11	17	512	463	175	234	78	147	472	420	390	514	389	563
YDR355C	3	0	1	135	42	30	61	23	27	61	73	76	50	49	57
YDR356W	311	14	45	3348	975	724	1254	495	703	1335	1776	1497	844	954	1031
YDR357C	125	22	39	154	108	47	59	25	38	111	120	118	102	147	148
YDR358W	327	9	62	1158	920	333	633	143	459	746	532	453	467	397	690
YDR359C	106	6	11	1046	594	275	496	142	273	1564	1772	1584	1361	1377	1420
YDR360W	5	0	0	46	32	11	9	2	4	73	90	93	90	89	97
YDR361C	487	47	101	1241	822	428	446	259	364	722	774	754	891	936	816
YDR362C	320	14	21	449	251	102	236	52	108	797	708	716	806	720	820
YDR363W-A	330	104	228	1013	716	324	616	238	443	342	382	316	260	339	329
YDR363W	120	3	13	905	507	210	330	105	165	592	611	549	510	496	569
YDR364C	325	6	42	356	202	95	162	50	94	562	529	535	675	506	643
YDR365C	1493	67	233	3250	2219	1161	1412	655	1238	2795	3046	3112	2805	2469	2428
YDR366C	120	20	31	100	77	28	79	18	53	185	169	134	353	251	378
YDR367W	56	7	9	124	61	24	35	10	16	150	128	127	173	179	221
YDR368W	138	5	18	348	199	109	181	42	105	413	314	325	222	222	404
YDR369C	104	2	20	521	249	96	190	50	110	456	484	486	339	297	455
YDR370C	392	48	78	339	177	61	103	35	56	393	366	359	485	468	431
YDR371C-A	0	0	0	0	0	0	0	0	0	0	0	0	0	0	0
YDR371W	183	10	43	209	193	80	97	44	72	255	233	207	187	206	212
YDR372C	806	91	227	1024	867	350	539	240	443	812	792	809	815	869	931
YDR373W	322	50	75	164	89	36	55	22	48	260	183	182	231	299	287
YDR374C	22	0	2	20	8	6	10	1	6	13	19	14	16	29	21
YDR374W-A	125	29	34	103	53	30	75	23	55	46	30	48	95	59	105
YDR375C	126	3	7	399	257	97	182	45	83	434	428	385	421	336	455
YDR376W	149	4	15	226	157	54	104	26	62	426	323	291	233	243	374
YDR377W	273	37	80	573	428	206	354	128	199	379	368	334	332	381	436
YDR378C	306	39	93	242	177	96	208	79	143	181	225	213	276	315	302
YDR379C-A	72	5	21	108	79	48	80	29	58	90	64	64	51	56	72
YDR379W	256	11	50	1896	1065	460	841	245	442	1509	1443	1407	1521	1208	1718
YDR380W	114	4	1	860	719	274	385	172	263	1013	658	679	1060	1233	1517
YDR381C-A	175	23	49	123	70	19	59	8	31	165	121	117	128	127	196
YDR381W	741	98	160	1449	928	452	563	232	383	1309	1212	1095	1536	1422	1636
YDR382W	621	37	57	978	558	308	596	221	580	1244	793	703	969	1198	988
YDR383C	298	33	77	724	410	222	382	136	191	291	311	267	258	254	290
YDR384C	50	9	11	95	85	27	51	16	19	486	332	357	481	353	301
YDR385W	1132	49	121	2704	1370	741	1259	554	1358	4310	2981	2962	3151	3864	3583
YDR386W	267	11	38	632	386	164	292	93	162	472	509	468	400	459	460
YDR387C	113	1	12	376	197	80	188	57	94	563	424	414	322	397	452
YDR388W	183	11	41	1217	564	350	484	185	348	1119	1143	1052	743	689	991
YDR389W	196	9	17	1246	619	357	462	185	268	1299	1348	1216	1680	1296	1680
YDR390C	178	29	40	520	251	105	201	63	98	548	512	597	501	496	497
YDR391C	189	8	32	978	655	302	420	140	316	336	299	278	382	305	386
YDR392W	225	13	44	306	156	69	141	43	72	480	481	450	399	347	416
YDR393W	323	4	35	1075	498	262	424	169	296	703	742	692	581	531	662
YDR394W	508	37	48	1634	1411	601	815	295	642	1360	1144	1114	990	1110	1238
YDR395W	477	34	67	1290	760	343	573	246	442	2183	2029	2147	2402	2645	2493
YDR396W	269	16	37	521	255	143	183	74	121	344	379	346	391	337	408
YDR397C	52	3	0	119	50	17	30	9	14	80	90	76	80	85	81
YDR398W	784	74	143	1440	768	390	488	219	272	1852	1891	1963	2189	2008	1961
YDR399W	815	113	208	618	315	136	321	157	241	804	746	646	877	1020	897
YDR400W	115	11	12	103	26	12	45	10	30	268	253	254	350	317	407
YDR401W	4	0	1	8	3	4	23	4	1	17	6	0	8	1	19
YDR402C	18	0	5	40	45	12	35	15	17	94	88	80	141	130	140
YDR403W	46	5	5	68	30	12	44	7	10	112	119	91	132	154	183
YDR404C	128	4	17	201	167	61	83	43	71	229	186	203	312	279	333
YDR405W	75	12	23	509	425	173	320	97	134	664	695	696	727	525	630
YDR406W-A	1	0	1	0	0	0	0	0	0	0	2	2	3	2	1
YDR406W	269	14	28	684	1442	389	411	81	225	1548	1111	959	1459	1076	1820
YDR407C	181	13	22	962	473	202	412	143	208	1047	1040	956	800	803	1060
YDR408C	168	8	31	689	435	211	414	178	289	563	587	586	541	500	614
YDR409W	108	9	16	289	167	63	131	30	56	640	653	689	570	538	614
YDR410C	108	18	19	51	49	10	28	13	16	134	111	106	194	218	204
YDR411C	47	5	1	143	85	34	103	15	49	269	192	147	356	316	376
YDR412W	483	21	52	721	460	216	335	129	233	455	529	594	496	394	462
YDR413C	61	22	77	257	126	92	50	32	76	240	244	222	295	275	245
YDR414C	139	10	15	337	165	77	146	50	80	374	354	387	307	386	358
YDR415C	266	11	38	207	117	37	85	17	58	485	408	415	486	497	552
YDR416W	374	14	57	675	436	196	330	117	255	1017	1079	1087	971	1016	1025
YDR417C	88	6	4	436	288	136	233	92	141	688	589	535	649	718	465
YDR418W	274	18	35	426	305	141	277	96	247	482	336	324	415	580	545
YDR419W	207	9	27	664	375	166	302	104	206	689	614	629	585	612	668
YDR420W	354	18	45	1283	664	330	558	127	271	2738	2834	2735	3758	3237	3890
YDR421W	116	4	8	857	441	205	396	116	232	894	886	898	637	610	839
YDR422C	138	5	13	1480	867	407	656	227	439	1604	1546	1671	1849	1558	2009
YDR423C	110	8	13	872	526	311	457	151	301	755	790	796	985	744	992
YDR424C	269	35	83	271	145	86	142	51	118	114	128	122	120	104	138
YDR425W	108	4	6	450	305	114	174	45	86	332	350	286	302	233	410
YDR426C	18	4	9	25	23	1	11	1	6	27	15	12	11	29	41
YDR427W	667	88	131	789	560	214	284	69	186	622	456	484	516	703	703
YDR428C	191	11	38	257	219	60	113	35	67	310	257	254	331	327	380
YDR429C	1425	144	371	1351	933	425	596	298	506	1273	1206	1198	1637	1657	1502
YDR430C	121	4	19	469	376	143	221	50	137	1267	998	939	1047	840	1324
YDR431W	5	0	0	31	28	7	12	4	3	63	48	44	62	50	56
YDR432W	403	40	68	491	301	150	205	41	125	2240	1501	1598	2458	1989	2264
YDR433W	49	7	7	85	29	10	17	5	0	332	275	344	382	349	438
YDR434W	355	26	71	968	432	222	401	165	290	893	904	946	874	905	1080
YDR435C	63	3	9	189	185	46	74	15	41	183	95	104	182	136	249
YDR436W	112	9	14	241	207	75	185	34	83	531	380	371	451	374	567
YDR437W	12	1	2	72	29	14	29	13	14	140	127	122	180	122	157
YDR438W	95	1	10	223	111	61	124	30	68	289	248	269	288	267	301
YDR439W	59	1	6	236	108	40	85	19	40	160	193	216	219	226	279
YDR440W	172	6	20	746	264	136	250	104	121	409	534	467	281	252	379
YDR441C	47	4	2	96	63	18	51	20	38	148	129	151	232	233	217
YDR442W	0	1	1	16	7	3	6	1	0	14	14	25	8	7	8
YDR443C	99	4	16	787	478	171	365	93	185	971	1005	1009	686	640	851
YDR444W	152	6	14	474	249	114	254	78	118	717	760	824	636	525	675
YDR445C	29	4	11	99	59	37	87	37	136	44	59	55	41	57	35
YDR446W	11	0	0	40	19	4	20	6	5	29	54	41	18	45	19
YDR447C	467	84	144	355	223	87	158	60	114	472	316	302	310	684	456
YDR448W	111	5	21	497	240	139	246	81	139	754	826	851	580	716	614
YDR449C	378	13	45	891	544	259	333	177	205	924	1109	1096	1151	1373	1194
YDR450W	1170	198	405	3306	1726	1055	1991	720	1271	1828	1932	1625	1155	1753	1321
YDR451C	34	2	8	384	115	70	205	59	100	224	368	240	214	383	266
YDR452W	458	27	118	1235	582	323	519	149	352	1633	1549	1535	932	1009	1262
YDR453C	11	0	2	53	24	8	25	6	12	80	42	31	70	47	107
YDR454C	319	15	45	692	384	195	235	84	174	543	516	489	680	579	666
YDR455C	2	0	0	10	6	3	4	0	0	16	20	15	18	18	23
YDR456W	126	4	11	253	176	53	111	36	57	519	366	402	404	460	496
YDR457W	511	25	79	3081	1420	750	1127	319	690	6004	5690	5881	6162	5486	7472
YDR458C	307	28	62	1141	710	343	487	167	309	999	940	931	686	715	796
YDR459C	72	2	8	128	101	22	62	16	23	284	233	260	315	325	313
YDR460W	202	8	48	962	691	304	521	200	339	454	483	522	351	332	333
YDR461C-A	63	4	11	144	91	49	96	26	78	71	55	48	66	63	87
YDR461W	0	0	0	2	2	1	2	0	0	1	0	0	1	1	1
YDR462W	47	1	9	352	259	144	242	94	173	202	189	168	216	237	235
YDR463W	288	30	55	1197	768	385	700	264	475	1586	1745	1681	1582	1715	1688
YDR464C-A	0	0	0	0	0	0	0	0	0	18	0	16	9	2	0
YDR464W	345	45	92	2167	912	534	819	300	477	2988	3570	3571	3325	2676	3036
YDR465C	825	57	134	843	658	253	380	149	318	1330	1309	1472	1460	1335	1215
YDR466W	149	6	16	1230	824	336	545	180	282	1434	1544	1439	1262	999	1369
YDR467C	38	2	9	58	34	12	15	3	11	76	66	65	66	71	103
YDR468C	263	34	61	322	151	87	225	82	140	254	304	279	229	231	264
YDR469W	238	46	85	817	405	235	472	197	311	265	425	399	331	313	364
YDR470C	49	3	3	325	215	78	160	42	82	420	381	335	228	237	285
YDR471W	979	136	302	1444	888	542	864	315	673	844	772	607	665	1197	774
YDR472W	77	4	13	178	93	45	68	25	48	281	190	236	324	388	367
YDR473C	666	42	132	748	324	178	329	135	263	486	511	598	336	358	362
YDR475C	204	15	20	859	447	219	451	114	218	1481	1374	1297	1139	1129	1457
YDR476C	29	1	3	80	58	27	39	8	23	209	137	143	272	232	244
YDR477W	230	11	23	766	475	228	355	83	178	1478	1337	1317	1204	1202	1342
YDR478W	181	21	48	519	256	132	254	104	140	412	427	421	419	429	365
YDR479C	260	16	54	449	291	126	245	71	150	735	558	583	531	545	590
YDR480W	44	3	3	331	106	73	160	44	85	216	263	247	172	168	197
YDR481C	413	40	81	403	214	105	204	59	123	1395	1118	1234	2231	1911	2538
YDR482C	541	19	64	543	394	191	326	119	267	380	390	342	633	281	429
YDR483W	429	29	32	879	557	239	368	134	270	1408	1176	1133	2173	1686	2058
YDR484W	149	7	20	797	486	185	299	94	161	481	518	495	517	470	613
YDR485C	318	13	39	1547	945	437	677	255	399	1458	1520	1531	1405	981	1205
YDR486C	315	34	116	1309	736	460	601	214	474	475	574	561	539	427	536
YDR487C	88	6	4	586	311	142	195	62	122	436	389	386	545	452	588
YDR488C	23	1	1	158	68	34	70	11	26	284	316	289	199	166	214
YDR489W	51	1	7	201	98	45	52	21	28	225	206	234	384	281	335
YDR490C	151	14	15	736	527	191	388	114	206	960	847	874	926	651	980
YDR491C	70	8	7	168	91	58	101	32	60	242	270	304	510	294	417
YDR492W	232	30	29	102	42	22	62	13	38	367	257	312	867	613	795
YDR493W	64	4	11	143	87	33	71	23	41	122	96	109	206	165	182
YDR494W	651	47	193	634	487	211	389	149	240	467	541	498	506	417	506
YDR495C	343	16	70	1404	842	326	570	226	395	1099	1156	1105	1172	1031	1365
YDR496C	2046	150	336	1924	1342	627	639	382	517	2259	2179	2280	2947	3243	2867
YDR497C	1404	101	193	1210	1703	547	549	214	459	2145	1777	1974	7033	4048	6959
YDR498C	94	2	6	510	287	105	166	38	100	439	351	339	520	395	592
YDR499W	273	20	34	770	381	188	336	102	197	752	778	784	686	630	850
YDR500C	1163	108	285	1967	1337	788	1349	584	1314	470	426	377	416	549	478
YDR501W	34	3	10	229	64	41	130	42	56	146	249	186	176	149	190
YDR502C	110	3	6	136	88	39	77	28	57	264	229	170	1645	628	1650
YDR503C	55	2	13	200	102	47	74	27	70	183	169	164	285	244	284
YDR504C	17	4	2	75	11	5	17	1	4	19	28	28	19	29	32
YDR505C	270	14	43	774	696	263	381	88	187	1334	1158	1112	1109	1030	1378
YDR506C	44	2	2	276	175	53	122	22	45	349	365	364	345	274	367
YDR507C	88	3	3	2750	427	561	877	334	373	1130	1730	1354	738	1022	1075
YDR508C	439	45	74	1024	955	382	516	170	314	2484	1823	2080	2308	2090	1770
YDR509W	15	1	3	178	162	66	63	27	19	193	344	314	275	182	147
YDR510C-A	1	0	0	16	4	0	3	0	4	1	0	5	1	5	5
YDR510W	70	3	12	399	238	132	252	89	139	375	315	334	348	348	384
YDR511W	66	4	23	154	116	48	72	24	34	110	98	86	136	134	173
YDR512C	230	19	66	520	339	162	265	97	188	178	181	171	122	117	139
YDR513W	253	26	58	455	307	150	203	65	145	168	127	103	118	122	163
YDR514C	210	13	44	203	95	41	96	28	42	461	444	555	479	400	398
YDR515W	306	24	75	651	365	164	181	61	119	394	375	403	391	375	442
YDR516C	78	2	10	172	127	43	125	21	67	269	142	96	280	221	381
YDR517W	103	4	7	376	216	104	236	61	108	514	467	470	379	310	481
YDR518W	133	10	11	1201	606	317	550	220	317	537	592	636	480	472	609
YDR519W	160	16	32	249	121	62	88	31	62	170	137	150	172	169	206
YDR520C	209	5	20	528	231	110	183	69	113	692	680	684	586	635	632
YDR521W	29	0	0	206	127	75	133	46	72	74	79	100	74	61	54
YDR522C	74	5	10	60	43	11	25	3	8	71	52	55	120	113	142
YDR523C	123	16	11	125	139	45	42	22	26	329	286	337	612	554	592
YDR524C-A	1	0	1	4	1	0	0	0	0	1	1	2	1	0	0
YDR524C-B	227	20	57	437	338	128	182	115	189	799	575	543	999	1098	913
YDR524C	174	5	34	928	522	245	310	117	184	799	879	861	1299	981	1326
YDR524W-C	0	0	0	0	0	0	0	0	0	0	0	0	0	0	0
YDR525W-A	37	4	3	42	20	11	17	6	5	55	25	33	106	110	108
YDR525W	4	1	0	13	8	5	10	2	2	8	13	8	7	10	17
YDR526C	3	1	0	123	53	16	15	13	9	107	111	115	197	86	178
YDR527W	254	19	37	1666	986	528	720	357	526	1249	1402	1417	1804	1239	1509
YDR528W	43	6	1	1436	278	366	363	123	183	641	798	790	796	754	918
YDR529C	416	81	189	861	628	309	359	132	272	520	509	403	283	305	384
YDR530C	139	7	5	356	227	105	164	44	93	376	321	316	511	403	539
YDR531W	113	8	25	190	97	36	55	13	25	218	174	169	190	163	259
YDR532C	414	55	137	765	401	182	291	113	221	373	447	444	372	346	381
YDR533C	214	9	22	315	151	62	118	25	46	464	272	267	267	309	381
YDR534C	31	0	3	64	59	16	45	13	20	79	100	83	38	48	39
YDR535C	1	0	0	5	5	0	4	0	0	9	7	6	5	7	16
YDR536W	20	1	1	99	78	24	55	10	27	230	189	155	208	246	328
YDR537C	4	0	1	9	2	4	0	0	5	22	30	19	33	30	33
YDR538W	25	2	0	72	40	12	47	12	13	186	130	148	112	129	137
YDR539W	160	8	22	364	227	91	195	72	113	618	504	504	404	412	481
YDR540C	91	10	32	117	54	31	52	20	45	65	90	73	46	53	62
YDR541C	37	2	7	239	89	39	108	18	38	217	196	163	130	116	174
YDR542W	6	0	0	8	0	0	3	4	0	0	8	10	0	5	15
YDR543C	8	1	1	5	7	2	8	0	0	1	5	0	1	1	1
YDR544C	115	3	24	261	118	59	105	17	42	10	64	25	7	11	9
YDR545C-A	18	0	0	0	5	18	0	9	6	32	20	33	0	46	14
YDR545W	143	15	44	717	319	167	304	77	135	1215	1164	1202	1172	937	1297
YEL001C	330	36	52	489	336	134	200	61	162	595	521	528	892	885	921
YEL002C	384	13	49	667	425	189	247	91	180	932	764	738	1504	1399	1571
YEL003W	274	87	148	1046	593	368	453	213	414	300	464	376	609	785	695
YEL004W	111	4	9	246	126	55	83	22	47	216	203	204	306	271	405
YEL005C	108	4	18	357	235	92	152	43	89	204	186	171	189	175	284
YEL006W	276	5	18	270	204	70	167	51	81	476	463	463	798	783	845
YEL007W	306	16	32	966	568	236	482	173	320	1528	1419	1509	1057	1088	1302
YEL008C-A	0	0	0	0	0	0	0	0	0	0	0	0	0	0	0
YEL008W	6	0	0	33	21	5	26	2	10	37	43	33	108	84	88
YEL009C-A	1	0	0	23	18	3	13	7	5	7	14	11	14	16	8
YEL009C	633	29	58	975	461	252	381	123	317	1426	797	798	1721	2322	2211
YEL010W	5	0	0	2	1	1	0	0	0	0	1	0	5	3	4
YEL011W	432	17	84	457	649	229	554	105	316	1008	733	622	1920	1345	2785
YEL012W	672	60	212	347	256	112	347	73	262	384	311	335	412	322	495
YEL013W	248	11	44	730	503	196	254	80	178	1012	891	820	1141	1355	1663
YEL014C	16	1	1	18	8	4	5	0	1	9	10	10	32	18	30
YEL015W	264	5	27	1427	863	456	685	308	500	1372	1623	1461	2163	1812	2048
YEL016C	103	7	28	408	163	69	184	66	110	628	611	648	787	834	964
YEL017C-A	52	1	2	21	6	3	3	1	10	32	22	17	70	79	74
YEL017W	30	2	1	157	72	33	48	11	19	147	136	113	261	266	314
YEL018C-A	46	0	9	133	75	46	75	26	58	61	75	74	108	60	76
YEL018W	161	8	25	721	372	165	261	99	191	405	494	487	667	662	656
YEL019C	50	0	4	384	135	80	154	56	99	367	407	424	816	555	749
YEL020C-B	12	1	4	47	34	12	22	6	3	27	22	26	83	90	76
YEL020C	191	12	7	207	104	51	113	38	72	752	513	496	3019	2348	3331
YEL020W-A	15	0	0	20	7	0	13	2	4	22	15	19	51	70	75
YEL021W	0	0	0	3	0	0	1	0	0	0	0	2	5	1	2
YEL022W	491	38	67	1955	1181	526	722	292	496	2137	2369	2344	3691	3267	3914
YEL023C	159	9	33	339	174	85	140	44	76	451	420	399	412	441	475
YEL024W	100	4	15	137	92	18	54	13	38	202	138	138	191	266	288
YEL025C	143	5	11	490	302	113	201	54	87	624	617	567	1475	1206	1768
YEL026W	146	14	14	340	216	100	147	64	102	545	376	414	1364	1169	1126
YEL027W	461	35	52	360	198	74	138	64	118	656	459	502	1233	1314	1171
YEL028W	25	1	3	88	35	10	35	10	15	79	99	84	134	127	165
YEL029C	143	14	44	204	101	42	49	20	38	304	333	312	566	626	681
YEL030C-A	0	0	0	0	0	0	0	0	0	1	1	1	3	9	7
YEL030W	22	1	4	408	263	106	122	33	68	268	233	242	228	277	345
YEL031W	374	37	56	1699	1121	558	671	243	498	3757	3205	3487	5557	5388	6214
YEL032C-A	0	0	0	13	6	0	5	0	6	0	0	0	0	0	0
YEL032W	197	10	19	901	421	189	344	88	173	2475	2070	2242	4937	3497	4743
YEL033W	133	11	17	27	23	17	9	5	29	19	18	13	37	40	42
YEL034C-A	1035	119	209	3565	2167	1453	1445	682	1347	1732	1255	1486	2665	2245	2131
YEL034W	0	0	0	0	0	0	0	0	0	0	0	0	0	0	0
YEL035C	4	1	2	29	17	0	16	2	8	42	30	42	153	76	150
YEL036C	331	27	65	785	534	254	445	161	272	1797	1883	1903	3549	2546	2686
YEL037C	318	27	40	741	548	202	291	109	189	1594	1327	1362	1947	1905	1717
YEL038W	43	2	3	159	104	43	56	12	27	172	124	109	246	207	261
YEL039C	370	61	152	227	256	97	118	24	102	124	106	92	125	160	174
YEL040W	536	22	44	777	381	181	184	63	110	766	786	700	3564	3013	3189
YEL041W	50	9	13	268	182	69	133	19	74	209	186	160	308	206	384
YEL042W	143	11	10	339	209	82	140	46	105	1286	1030	1055	2387	2079	2101
YEL043W	139	11	23	920	609	252	369	108	195	1501	1401	1555	2601	2235	2704
YEL044W	105	22	30	173	93	45	84	31	50	191	199	183	437	351	392
YEL045C	11	3	2	22	21	10	11	9	8	23	26	31	65	54	53
YEL046C	149	5	11	422	204	99	151	43	80	1362	988	982	2394	2187	2218
YEL047C	89	3	7	395	186	81	155	57	84	627	671	613	881	882	1083
YEL048C	59	2	12	83	28	15	30	8	13	107	99	79	157	205	191
YEL049W	16	0	3	36	22	4	19	2	6	123	82	88	162	138	110
YEL050C	145	11	25	409	253	127	221	55	123	575	565	582	808	819	951
YEL050W-A	8	0	6	2	0	0	3	3	0	5	4	3	14	5	10
YEL051W	626	107	242	2999	1987	1033	1453	591	1034	1019	1236	1133	1503	1514	1712
YEL052W	173	6	16	355	253	68	143	62	111	744	651	626	865	884	930
YEL053C	86	5	13	405	177	67	114	43	63	600	504	544	708	836	925
YEL053W-A	10	1	0	228	180	54	92	27	49	386	323	265	578	538	380
YEL054C	312	21	41	602	349	176	301	146	315	712	402	419	1033	1286	1189
YEL055C	709	24	86	1889	1046	521	761	367	653	2606	2464	2553	3576	3893	3634
YEL056W	114	5	17	349	223	101	167	61	102	399	456	379	442	493	600
YEL057C	24	0	3	46	42	14	40	5	8	47	54	44	62	73	56
YEL058W	214	9	28	351	185	77	192	64	112	1143	805	819	1228	1057	1447
YEL059C-A	36	0	6	76	70	30	71	26	47	100	80	79	126	106	118
YEL059W	8	0	0	35	19	7	43	7	16	45	75	59	53	60	62
YEL060C	453	38	57	911	601	318	758	217	512	3305	2408	2131	5836	4281	6149
YEL061C	71	5	15	1646	478	314	651	256	312	1012	1504	1259	1254	1479	1590
YEL062W	87	7	22	572	306	149	202	68	93	434	466	439	867	675	984
YEL063C	190	11	41	608	421	179	235	72	145	1240	1004	979	3758	2563	3494
YEL064C	71	1	16	153	62	25	66	16	28	254	251	220	536	447	682
YEL065W	299	18	51	260	566	137	306	86	185	1359	757	805	1746	2709	1745
YEL066W	20	1	4	180	47	46	65	18	22	83	71	53	156	86	165
YEL067C	17	0	4	169	56	40	49	21	21	85	104	104	133	131	156
YEL068C	31	2	5	81	27	19	27	5	13	62	68	62	83	73	108
YEL069C	32	0	7	117	85	26	82	15	26	212	256	267	517	306	444
YEL070W	28	3	0	56	76	13	67	10	35	35	65	31	59	133	92
YEL071W	441	45	45	587	1157	320	280	114	185	1113	985	1026	2628	3734	3033
YEL072W	69	9	21	85	33	9	21	10	10	79	86	83	205	196	251
YEL073C	27	0	1	18	21	2	6	0	4	59	33	29	187	141	208
YEL074W	47	3	7	98	88	26	54	11	11	62	85	69	119	77	101
YEL075C	14	0	9	11	10	3	0	0	0	16	5	24	79	62	68
YEL075W-A	0	0	0	62	19	0	0	1	0	71	109	159	293	234	251
YEL076C-A	10	0	1	0	0	0	0	0	15	0	0	0	1	0	26
YEL076C	0	0	0	242	95	50	72	24	6	240	265	304	456	337	412
YEL077C	117	12	16	538	190	121	185	38	108	897	965	901	1206	900	1370
YEL077W-A	0	2	0	0	0	0	0	0	0	0	0	0	0	0	0
YER001W	1045	40	126	2148	763	571	626	249	414	2338	2247	2409	4377	4173	5093
YER002W	1436	145	377	855	427	261	381	167	268	669	720	763	888	818	728
YER003C	57	3	6	645	195	169	269	80	148	675	706	700	962	894	1162
YER004W	133	2	12	268	142	80	157	43	80	438	317	343	779	655	741
YER005W	213	5	32	375	190	53	166	59	105	981	758	923	1773	1519	1804
YER006C-A	13	0	0	10	6	4	11	1	2	11	23	24	21	22	30
YER006W	831	53	116	2807	2308	1079	1146	609	865	2803	2736	2845	4621	4456	4076
YER007C-A	130	12	25	223	145	44	52	23	42	220	179	161	449	419	416
YER007W	175	4	18	117	57	16	50	12	22	178	166	187	317	358	381
YER008C	334	23	39	2329	1422	660	1095	305	593	2147	2245	2269	3473	2999	3863
YER009W	137	23	21	122	70	30	36	17	16	198	157	137	434	497	485
YER010C	97	8	11	170	85	41	67	17	40	210	141	150	410	366	432
YER011W	46	3	3	182	56	52	131	14	61	526	254	228	489	270	708
YER012W	735	80	149	456	344	150	166	67	142	491	361	333	662	864	857
YER013W	229	15	34	1448	835	349	609	171	360	1620	1734	1751	2606	2421	2832
YER014C-A	26	0	2	0	5	0	0	0	0	20	5	18	18	30	57
YER014W	193	7	27	353	135	71	143	49	105	639	676	601	648	571	941
YER015W	43	1	5	181	162	37	103	26	37	294	252	214	246	367	459
YER016W	121	6	15	303	103	42	126	33	71	326	391	407	346	347	413
YER017C	147	3	9	398	248	87	169	59	80	1418	1073	1183	2143	1890	2539
YER018C	19	4	7	129	61	24	63	20	42	154	162	191	409	348	378
YER019C-A	431	54	101	349	176	105	182	56	176	171	104	140	442	401	485
YER019W	97	2	11	349	176	73	149	38	71	743	581	626	1320	1064	1293
YER020W	215	20	31	853	584	277	645	200	450	1382	1245	1117	2972	1976	3018
YER021W	494	29	74	697	537	176	248	77	193	1134	785	788	1247	1591	1676
YER022W	473	23	105	1356	770	317	540	186	319	832	888	837	1192	1232	1362
YER023C-A	0	1	0	0	1	0	0	1	0	11	17	7	8	8	14
YER023W	125	6	17	472	276	117	181	50	111	628	556	488	965	717	1067
YER024W	200	11	50	548	423	151	442	138	296	1166	1154	958	1701	2414	2216
YER025W	430	21	62	1597	1114	510	630	253	487	1921	1775	1791	2690	2885	2630
YER026C	908	66	166	452	698	237	191	55	144	589	437	439	2683	1648	2583
YER027C	73	5	4	474	389	153	270	54	147	711	601	589	1046	837	1066
YER028C	17	2	4	252	153	58	148	63	75	324	331	237	454	526	397
YER029C	293	42	113	661	396	216	304	143	242	392	401	371	589	544	505
YER030W	756	231	496	1941	1093	679	973	350	725	475	564	535	467	465	558
YER031C	188	9	20	339	159	81	138	43	102	425	357	385	560	529	586
YER032W	81	8	20	386	181	61	185	47	70	521	623	583	719	743	789
YER033C	140	6	30	614	301	123	276	60	155	1348	1241	1269	2246	1734	2605
YER034W	22	3	8	597	308	171	205	82	105	355	328	302	455	368	455
YER035W	93	3	13	396	268	117	210	55	141	562	414	361	948	654	977
YER036C	802	40	112	2371	1987	779	834	390	592	3286	2474	2535	5148	5065	4773
YER037W	502	62	81	1124	375	293	416	172	293	991	822	882	1433	1592	1755
YER038C	217	19	41	425	225	113	176	58	109	317	290	313	603	587	746
YER038W-A	6	0	2	82	40	23	36	16	15	4	17	8	4	17	14
YER039C-A	5	0	1	15	10	4	8	3	7	31	24	24	35	26	39
YER039C	23	0	4	47	34	9	12	0	10	62	73	75	211	174	208
YER040W	104	5	21	932	559	280	422	124	167	826	908	859	1379	1176	1537
YER041W	129	7	22	556	312	143	217	53	124	634	597	600	930	793	1074
YER042W	184	24	53	40	36	9	21	9	22	84	75	64	195	173	249
YER043C	396	21	31	771	664	247	282	95	242	1850	1311	1393	4877	4117	4636
YER044C-A	26	0	2	101	29	15	13	6	6	131	131	142	215	181	241
YER044C	69	13	11	34	15	7	12	3	4	48	43	38	143	90	178
YER045C	156	16	47	606	250	125	223	81	90	708	750	789	1143	957	1142
YER046W-A	14	1	8	18	9	7	9	2	8	28	27	25	47	60	73
YER046W	119	12	44	33	22	11	25	4	11	90	62	68	126	130	129
YER047C	180	21	37	1098	517	259	550	182	289	1343	1334	1354	1908	1493	1722
YER048C	501	39	113	1610	1266	598	836	317	680	1069	1024	991	1216	1141	1305
YER048W-A	152	24	52	322	240	106	160	61	107	254	224	229	457	430	517
YER049W	1466	99	201	1204	777	361	454	233	355	2047	1894	1922	2947	3091	2868
YER050C	288	76	125	305	245	90	133	56	111	270	242	251	617	605	667
YER051W	273	9	55	433	383	167	259	94	164	473	429	444	695	642	816
YER052C	77	4	12	282	125	59	87	22	64	527	345	337	1084	885	1146
YER053C-A	17	1	1	9	1	3	8	2	4	7	5	3	6	11	6
YER053C	300	7	33	479	266	113	133	27	50	515	373	248	431	372	690
YER054C	164	2	24	486	1081	298	567	97	320	547	468	395	698	594	917
YER055C	561	77	125	1678	862	547	797	369	547	1246	1344	1206	2481	1786	2528
YER056C-A	499	55	114	1311	789	497	763	298	727	11	19	11	1380	1821	1387
YER056C	519	27	69	664	210	129	226	75	208	1720	1431	1486	3454	3025	3153
YER057C	112	6	22	625	350	200	403	132	201	446	408	387	553	537	603
YER058W	36	4	13	144	72	30	65	20	34	68	58	46	42	45	55
YER059W	152	8	18	570	413	206	378	134	243	492	589	477	541	515	730
YER060W-A	54	1	5	266	108	49	148	27	51	514	709	623	1322	774	1421
YER060W	41	1	7	239	95	46	110	19	48	469	542	490	909	697	1063
YER061C	65	6	8	232	112	47	149	42	85	437	517	488	1185	655	1393
YER062C	102	5	13	936	336	191	306	121	204	1121	805	786	2646	1888	2680
YER063W	81	7	10	306	173	77	115	29	67	379	279	238	595	466	690
YER064C	134	9	17	975	599	316	527	175	299	1404	1196	1256	2316	1484	1983
YER065C	77	3	16	150	107	30	268	62	130	936	763	594	931	915	1461
YER066C-A	354	56	209	298	389	152	409	85	218	143	165	137	189	131	274
YER066W	71	7	1	38	40	13	25	8	10	60	56	44	77	78	107
YER067C-A	201	54	181	113	94	43	86	30	113	37	17	17	46	38	98
YER067W	257	45	151	327	417	173	432	55	128	318	317	280	335	265	557
YER068C-A	10	0	0	82	22	35	22	11	13	52	69	81	158	78	124
YER068W	125	13	19	1201	816	384	583	240	305	1259	1422	1410	2444	2033	2231
YER069W	83	7	14	396	171	80	155	40	96	997	824	877	1790	1078	1896
YER070W	47	2	5	762	90	129	232	47	193	1208	1734	1366	1817	2557	2533
YER071C	125	14	21	97	50	20	31	7	13	101	67	68	220	243	258
YER072W	711	71	146	464	282	160	306	120	328	643	571	545	1405	1263	1402
YER073W	278	21	40	576	350	156	310	111	205	2427	1534	1951	3857	1944	3716
YER074W-A	151	29	41	81	29	16	30	7	24	89	71	61	178	181	227
YER074W	493	67	136	1798	801	598	762	341	615	1111	1127	834	1511	2106	1674
YER075C	284	35	53	1277	761	347	571	185	294	1384	1404	1610	2380	1989	2316
YER076C	38	2	4	62	25	11	17	6	10	95	75	83	112	139	202
YER076W-A	11	1	2	39	24	8	12	3	5	32	34	31	51	46	56
YER077C	306	24	56	772	354	184	305	109	200	869	857	903	1283	985	1236
YER078C	117	11	16	364	347	115	144	38	88	504	461	434	751	778	848
YER078W-A	3	0	0	8	9	0	7	1	0	2	4	1	6	2	2
YER079C-A	0	0	0	71	34	23	25	6	15	99	94	85	156	92	156
YER079W	192	14	40	481	340	128	247	65	137	320	282	222	419	406	511
YER080W	331	17	46	1792	935	546	742	276	557	1336	1345	1229	1580	1408	2202
YER081W	294	15	34	334	218	65	153	57	120	979	642	733	1977	1632	2103
YER082C	345	17	68	1242	790	381	446	187	330	1817	1947	1938	3443	3085	2960
YER083C	97	5	11	194	153	51	79	18	56	433	346	371	1032	761	905
YER084W-A	0	0	3	12	15	3	16	3	3	19	14	10	18	16	10
YER084W	29	2	5	39	55	12	38	6	15	97	91	104	162	109	127
YER085C	4	1	0	0	0	0	0	0	0	0	9	12	0	0	0
YER086W	126	0	10	577	396	151	191	63	100	740	616	601	1333	1239	1305
YER087C-A	33	0	8	119	70	29	66	18	36	82	90	76	104	89	127
YER087C-B	56	1	6	166	73	34	56	19	49	133	116	118	211	225	237
YER087W	28	0	1	152	91	35	72	12	28	185	218	210	337	214	395
YER088C-A	69	8	16	271	147	93	104	40	57	182	183	158	229	203	235
YER088C	278	37	71	861	355	236	452	131	258	2459	1947	2106	3231	3142	3221
YER088W-B	6	0	1	49	23	16	24	9	10	51	45	44	57	48	67
YER089C	65	2	6	480	311	142	228	62	95	1161	1071	1035	1790	1685	1849
YER090C-A	0	0	0	0	0	0	0	0	0	0	0	0	0	0	0
YER090W	88	2	5	321	131	53	89	32	58	570	496	496	958	797	1064
YER091C-A	3	0	0	3	3	0	5	0	0	2	8	2	2	7	3
YER091C	113	0	22	247	187	65	178	47	167	944	744	542	1998	1563	2443
YER092W	177	18	61	534	303	180	299	116	217	239	246	243	434	389	458
YER093C-A	28	1	1	157	81	38	80	20	42	119	102	101	228	192	239
YER093C	225	10	27	813	439	184	329	95	207	1347	1414	1405	2370	2159	2622
YER094C	634	32	62	851	627	286	377	141	301	748	578	572	727	929	1035
YER095W	98	1	10	494	257	142	261	61	140	834	576	575	1241	1044	1236
YER096W	149	5	27	115	102	24	62	11	23	358	186	207	240	337	350
YER097W	9	0	0	45	21	14	16	5	12	59	74	66	105	89	115
YER098W	148	10	26	305	208	70	205	41	81	665	616	584	928	946	1179
YER099C	348	18	45	169	100	45	65	19	42	456	314	359	783	857	777
YER100W	388	33	92	906	516	253	397	183	323	569	567	615	846	959	920
YER101C	58	2	1	197	128	52	114	25	48	306	263	251	228	314	311
YER102W	1527	200	306	1941	1045	607	954	443	782	1949	1899	1659	2193	2957	2176
YER103W	133	7	10	662	279	157	804	108	234	2239	1670	1771	1653	2638	2317
YER104W	36	2	9	505	188	135	254	108	166	196	224	193	263	323	302
YER105C	343	18	39	1221	696	333	474	164	274	2438	2434	2548	4383	4004	4738
YER106W	15	3	2	81	15	14	28	13	13	41	60	56	75	128	58
YER107C	170	11	21	297	172	74	91	38	66	353	332	334	590	645	641
YER107W-A	50	4	5	62	55	14	31	11	11	78	71	63	129	116	119
YER110C	714	76	123	2430	2180	828	1048	458	761	4229	3576	3960	5559	6348	5531
YER111C	190	5	22	3697	1411	910	1165	485	599	1121	1610	1278	956	1117	1573
YER112W	363	91	241	800	488	258	332	144	241	473	542	481	723	783	683
YER113C	164	6	14	361	160	57	113	27	66	870	816	891	1155	1357	1298
YER114C	350	13	46	1294	584	331	647	206	405	2501	2448	2437	4114	3689	4052
YER115C	49	0	9	115	71	32	66	12	29	226	165	163	169	292	258
YER116C	64	0	8	449	236	127	237	81	170	450	451	432	631	593	684
YER117W	1257	194	424	1049	583	329	569	231	504	1175	984	877	1330	2234	1551
YER118C	264	13	32	1004	529	306	508	222	325	837	1019	1030	1276	1374	1204
YER119C-A	19	2	3	125	85	44	42	8	22	100	132	117	173	168	166
YER119C	44	1	8	183	92	33	76	23	31	414	318	325	445	463	613
YER120W	167	9	26	748	612	297	360	126	204	899	785	738	1029	1079	1187
YER121W	107	10	43	221	721	272	171	35	146	115	80	86	103	91	139
YER122C	1053	48	170	2525	1465	863	1219	514	877	1606	1836	1793	2165	2149	2127
YER123W	613	26	93	1355	729	390	540	225	361	1102	1154	1177	1495	1472	1601
YER124C	49	2	4	1528	774	386	405	140	203	2181	2195	2029	1709	3428	3657
YER125W	617	22	69	2256	1493	747	1049	334	739	2961	2584	2643	3145	3195	3610
YER126C	1573	413	734	1390	966	515	683	368	644	1135	1167	1101	2180	2361	1964
YER127W	839	68	182	1819	961	575	785	408	591	1653	2031	1925	2826	2743	2389
YER128W	64	6	8	286	95	49	68	28	39	163	172	133	256	203	256
YER129W	347	27	49	1977	1194	553	851	310	563	2340	2400	2460	3428	3311	3731
YER130C	398	17	18	1295	511	285	361	108	232	1182	1143	1128	1496	1928	1712
YER131W	2108	144	459	3044	1904	1156	1979	827	1538	1504	1434	1343	1936	2912	1979
YER132C	308	16	41	2024	979	519	792	242	444	3317	3366	3558	6520	6335	6511
YER133W-A	78	7	24	157	100	44	77	14	47	89	78	74	131	99	155
YER133W	1507	261	500	1470	1029	471	659	265	495	1337	1173	1122	1684	2001	1982
YER134C	99	3	10	375	273	102	150	62	96	216	192	190	273	225	338
YER135C	7	0	0	10	14	2	2	2	1	17	17	20	39	40	52
YER136W	916	42	170	1244	1114	448	615	249	480	1561	1357	1249	2111	1747	2487
YER137C	331	27	75	426	234	125	212	104	153	205	272	269	339	424	302
YER137W-A	9	2	4	79	52	22	35	12	15	35	54	48	69	45	62
YER138W-A	0	0	0	0	0	0	0	0	0	0	1	0	0	0	0
YER139C	133	8	22	242	122	64	87	37	69	190	185	183	254	258	326
YER140W	297	15	48	637	373	166	254	122	170	656	644	669	1436	1178	1261
YER141W	207	3	22	471	322	147	257	79	167	793	595	610	1305	1088	1609
YER142C	477	39	105	283	351	102	145	36	89	283	187	185	251	282	395
YER143W	136	4	17	311	292	99	143	29	74	530	379	333	585	621	757
YER144C	108	5	18	214	125	49	136	25	43	881	597	651	1472	929	1594
YER145C-A	88	10	13	332	180	133	137	61	86	208	231	213	383	332	306
YER145C	805	23	57	768	733	321	752	285	506	2885	2548	2948	2624	5419	2637
YER146W	211	13	28	238	179	69	125	39	94	146	121	132	287	326	296
YER147C-A	144	5	20	271	238	127	215	93	179	274	320	303	427	391	439
YER147C	133	6	19	247	157	62	148	44	77	784	661	696	1221	1007	1217
YER148W-A	13	0	3	70	74	23	42	10	24	69	70	60	118	65	87
YER148W	380	18	60	293	177	69	93	40	62	545	476	470	1005	1066	1075
YER149C	62	2	6	383	317	116	107	35	41	303	319	310	540	518	658
YER150W	431	35	67	802	1036	384	421	103	242	630	497	406	1459	946	1525
YER151C	367	37	52	1362	655	330	537	173	347	2026	2115	2209	3293	2575	3159
YER152C	59	4	9	149	59	17	75	14	39	620	451	461	664	484	1025
YER152W-A	3	0	1	19	19	5	10	3	5	183	125	146	230	153	234
YER153C	13	0	1	153	71	34	133	15	46	478	434	424	618	475	776
YER154W	101	18	29	445	283	145	244	84	162	839	809	797	1384	1251	1390
YER155C	446	24	60	2355	1273	559	905	266	648	3537	3623	3792	7064	6278	7535
YER156C	235	14	16	582	491	193	279	93	166	1106	865	974	1924	1889	1821
YER157W	165	12	28	839	474	186	365	126	182	693	681	634	975	1041	1118
YER158C	344	16	24	1178	521	360	816	213	371	1417	1470	1451	2285	2149	2325
YER158W-A	162	72	159	251	134	102	209	61	144	152	196	163	201	219	207
YER159C	914	120	272	933	414	298	655	280	614	640	640	666	769	829	770
YER161C	249	21	51	1368	888	445	606	248	410	822	880	899	1268	927	1105
YER162C	325	15	67	695	458	145	340	87	211	1143	1027	1085	1621	1116	1564
YER163C	160	6	15	190	98	35	93	17	55	283	218	222	581	402	580
YER164W	352	17	32	2158	1053	524	822	280	497	3360	3284	3584	4441	3726	4350
YER165C-A	5	0	0	106	63	27	58	16	28	112	117	138	189	147	204
YER165W	325	34	44	2022	1588	799	1083	397	770	4478	3827	3741	5697	5606	5637
YER166W	339	9	29	2062	1178	554	966	302	610	3784	3447	3644	4529	4303	5351
YER167W	196	4	25	1542	973	466	839	316	485	2018	2120	2039	2632	2297	2629
YER168C	311	26	51	605	395	164	244	94	150	843	772	833	1566	1592	1595
YER169W	236	13	26	851	496	217	276	103	180	1552	1255	1298	2434	1596	2319
YER170W	86	2	12	194	92	36	83	39	51	116	129	133	166	157	175
YER171W	534	41	97	1102	761	307	492	175	303	1320	1276	1278	2622	2280	2414
YER172C-A	1	0	0	17	10	0	8	0	2	27	24	29	52	39	34
YER172C	535	15	61	1940	1115	445	678	200	457	3810	3679	3923	6999	6335	7203
YER173W	144	7	13	650	353	137	210	72	113	527	554	548	633	650	740
YER174C	273	34	52	339	185	82	127	49	67	293	312	272	497	367	524
YER175C	132	4	15	607	314	169	301	91	175	476	483	449	658	496	739
YER175W-A	0	1	2	2	1	0	2	0	0	8	2	5	7	4	10
YER176W	214	20	30	1150	520	242	458	112	259	2041	2076	2126	2583	2236	2731
YER177W	542	25	68	2162	1230	706	1111	343	703	2115	1717	1705	1493	1186	1945
YER178W	113	9	11	505	350	161	180	44	108	720	570	456	961	700	1358
YER179W	44	3	13	51	37	11	36	2	11	56	44	31	75	75	120
YER180C-A	13	0	2	91	55	33	47	18	19	61	66	60	129	100	153
YER180C	121	5	15	151	85	37	47	25	24	313	207	205	329	314	342
YER181C	7	0	1	2	14	1	4	2	1	6	7	1	13	16	22
YER182W	156	9	16	161	117	50	60	18	39	140	110	103	280	258	369
YER183C	96	1	10	345	177	79	119	44	83	287	213	249	438	485	445
YER184C	72	2	9	152	91	38	78	20	44	653	477	519	1265	968	1484
YER185W	32	1	4	45	25	12	30	8	10	71	63	76	105	109	118
YER186C	312	20	56	186	103	41	64	29	44	406	325	304	545	497	634
YER187W	123	5	20	72	64	31	17	10	22	82	64	73	398	263	346
YER188C-A	11	1	6	24	20	6	22	6	6	3	18	7	7	9	8
YER188W	162	7	21	56	26	18	29	4	20	156	67	64	232	111	336
YER189W	10	0	0	0	0	0	0	0	0	0	12	0	0	0	0
YER190C-A	0	0	0	0	0	0	0	0	0	0	0	0	0	0	0
YER190C-B	4	0	0	0	0	0	0	0	0	0	0	0	0	0	0
YER190W	0	0	0	276	124	79	153	22	76	707	685	750	1089	875	1292
YFL001W	332	20	47	834	524	213	300	108	190	751	727	764	865	840	873
YFL002C	680	37	74	1254	735	352	526	214	365	1047	1064	1147	1122	1098	1175
YFL003C	89	3	15	261	102	48	104	31	50	178	222	250	183	235	191
YFL004W	412	24	50	1247	845	396	575	209	393	1713	1588	1558	1568	1591	1942
YFL005W	648	93	275	922	695	339	565	189	454	817	731	747	826	819	800
YFL007W	643	33	87	1861	1124	495	697	216	528	4201	3220	3541	3449	2969	3901
YFL008W	283	21	31	3200	828	659	1051	390	568	1982	2389	2315	1546	1608	1773
YFL009W	240	17	33	333	217	95	156	36	84	856	710	795	970	886	1044
YFL010C	80	4	8	320	210	68	103	31	41	497	412	459	405	357	419
YFL010W-A	132	13	22	309	230	120	180	66	102	265	262	276	223	222	258
YFL011W	10	1	13	18	19	1	13	3	3	20	31	18	33	36	39
YFL012W-A	7	2	2	140	62	39	57	24	39	81	123	97	79	57	72
YFL012W	16	2	6	61	38	12	32	14	11	16	33	34	16	30	8
YFL013C	176	7	40	986	504	254	447	162	276	1070	1098	1113	831	705	924
YFL013W-A	193	24	31	518	305	134	258	106	179	215	259	216	189	126	160
YFL014W	421	21	60	2095	832	521	735	202	529	1487	748	545	262	367	465
YFL015C	16	4	7	44	26	9	30	7	17	6	3	3	1	2	2
YFL015W-A	2	0	1	7	6	1	5	1	5	1	0	0	0	0	4
YFL016C	142	12	38	760	468	206	410	129	307	1118	907	909	571	611	723
YFL017C	107	2	17	79	43	15	35	4	24	191	158	179	105	107	127
YFL017W-A	79	13	22	57	22	18	13	6	8	26	25	20	38	37	33
YFL018C	158	15	30	820	546	241	444	123	255	1257	1065	933	779	692	1083
YFL019C	14	1	4	14	7	2	14	3	2	24	25	13	4	12	17
YFL020C	22	0	4	17	23	6	22	3	4	89	64	52	35	33	50
YFL021C-A	23	2	6	96	40	18	41	3	17	136	68	112	184	92	101
YFL021W	56	6	33	249	119	65	154	30	43	753	668	558	1164	718	1102
YFL022C	263	11	30	602	399	184	348	91	194	1652	1307	1383	1513	1446	1498
YFL023W	260	13	40	1061	494	239	368	123	229	1607	1715	1807	1705	1118	1323
YFL024C	292	36	77	1474	880	430	632	226	404	1469	1551	1489	1471	1585	1558
YFL025C	165	12	20	497	312	115	200	52	117	1028	948	999	1063	1137	1246
YFL026W	76	6	10	134	115	21	71	18	28	98	112	109	145	166	143
YFL027C	242	19	40	356	186	113	174	38	102	288	314	287	295	261	294
YFL028C	402	48	82	349	227	86	123	46	83	343	332	293	448	411	499
YFL029C	117	5	10	356	205	88	171	41	108	316	280	244	150	149	194
YFL030W	54	1	4	64	54	16	70	10	25	253	145	146	179	186	253
YFL031C-A	1	1	0	4	0	0	0	1	0	8	6	3	6	7	6
YFL031W	562	61	96	584	328	179	293	92	295	1736	1092	1077	1627	1725	1964
YFL032W	11	0	2	4	5	0	0	3	1	7	5	4	10	8	6
YFL033C	314	16	42	1194	857	325	647	158	376	2272	1989	1982	2006	1531	2359
YFL034C-A	270	11	42	715	392	224	0	0	0	369	393	336	242	743	364
YFL034C-B	38	3	4	289	172	91	144	57	70	427	439	440	622	427	500
YFL034W	258	12	44	950	574	245	578	179	406	1502	1538	1440	1240	1080	1330
YFL036W	459	61	94	1862	1638	668	1029	356	640	2189	1972	2126	2565	1882	2622
YFL037W	104	15	13	496	148	127	217	69	174	841	713	665	678	613	698
YFL038C	614	31	107	1376	922	429	718	262	549	1082	1060	998	997	1016	1081
YFL039C	246	10	14	2407	1144	663	899	366	692	1935	1405	1371	1442	1569	1988
YFL040W	36	3	2	57	39	10	35	6	8	128	124	115	145	113	188
YFL041W-A	3	0	0	0	2	0	2	1	0	8	3	1	5	2	8
YFL041W	149	8	11	412	296	118	238	68	125	999	737	791	828	836	889
YFL042C	138	8	26	432	272	100	282	60	137	596	532	528	533	360	714
YFL044C	101	5	14	247	212	78	135	28	89	276	216	181	224	223	309
YFL045C	459	43	68	362	178	88	161	67	159	559	396	393	482	617	563
YFL046W	305	35	44	473	168	95	151	51	95	229	246	250	183	153	204
YFL047W	139	8	17	477	274	120	209	58	117	857	859	833	804	739	884
YFL048C	336	25	71	612	398	153	233	73	166	801	684	718	774	831	1009
[truncated: 4,601 more rows]

## Sheet: tp45
ORF	Sample1_groupwt	Sample2_groupwt	Sample3_groupwt	Sample1_grouprpl22a	Sample2_grouprpl22a	Sample3_grouprpl22a	Sample1_grouprpl22b	Sample2_grouprpl22b	Sample3_grouprpl22b	Sample1_grouprpl34a	Sample2_grouprpl34a	Sample3_grouprpl34a	Sample1_grouprpl34b	Sample2_grouprpl34b	Sample3_grouprpl34b
Q0010	9	8	7	45	12	6	11	11	14	20	12	14	3	6	6
Q0017	0	1	2	1	0	0	2	2	0	2	1	3	1	1	5
Q0032	0	0	0	0	0	0	0	0	0	0	0	0	0	0	0
Q0045	147	92	255	668	170	111	278	253	321	3849	2359	4837	9896	7681	4349
Q0050	763	425	1221	6602	1561	1024	2082	1328	1884	20120	15576	19128	31685	22368	15288
Q0055	474	268	599	3934	923	565	1476	1073	1359	19196	14375	19769	36055	24039	16204
Q0060	27	17	39	348	79	54	98	55	76	1490	841	1488	1615	1293	1100
Q0065	48	15	58	337	66	48	50	32	51	1657	813	1608	1540	1376	1170
Q0070	50	23	73	564	218	135	119	113	100	1421	778	1128	1103	928	743
Q0075	30	9	22	131	21	32	18	12	13	504	291	507	495	424	364
Q0080	1	2	1	1	0	0	0	0	0	1	2	5	16	14	5
Q0085	39	13	60	419	101	61	133	73	100	1598	1104	1943	3880	3028	1857
Q0092	0	0	0	0	0	0	0	0	0	0	0	0	0	0	0
Q0105	189	53	265	1181	257	192	395	254	370	6503	4267	6562	12870	9177	5014
Q0110	43	17	59	350	93	60	62	64	79	804	427	666	743	565	481
Q0115	22	7	22	126	15	12	23	16	19	338	162	307	322	286	204
Q0120	43	21	52	488	150	113	104	107	126	879	623	874	794	752	555
Q0130	81	28	93	189	60	28	47	63	87	218	155	293	985	644	350
Q0140	4	4	7	37	10	4	6	8	10	28	19	27	98	70	48
Q0142	4	1	0	9	0	1	0	0	0	6	5	4	9	6	6
Q0143	1	0	1	0	0	0	1	0	0	2	1	2	3	0	0
Q0144	0	0	0	0	0	0	0	0	0	0	0	0	0	0	0
Q0160	47	15	52	59	10	3	6	6	6	209	96	222	534	392	334
Q0182	2	1	2	6	1	4	1	2	2	21	6	29	14	13	11
Q0250	116	55	180	730	208	73	248	202	301	2807	1770	3255	6788	4687	2578
Q0255	20	7	9	150	44	31	25	28	36	408	271	481	554	490	382
Q0275	35	11	77	330	69	36	95	44	89	1565	1044	1938	4519	3553	1886
Q0297	0	0	0	4	0	0	0	0	0	1	0	6	9	2	0
YAL001C	163	61	120	640	240	126	202	222	226	1632	1549	1145	983	878	810
YAL002W	93	51	125	595	141	99	176	121	118	1236	1179	978	1037	905	882
YAL003W	663	528	967	6709	4668	2594	3453	2678	2225	3902	4076	2993	3329	2744	2293
YAL004W	0	0	0	34	0	56	68	45	29	131	159	63	128	149	39
YAL005C	452	103	238	1502	968	445	256	562	476	1485	1394	1305	1733	1653	1240
YAL007C	147	64	134	474	229	135	156	170	161	602	629	559	487	387	334
YAL008W	264	103	339	124	31	14	21	42	42	261	248	178	169	165	138
YAL009W	179	96	198	207	71	36	74	56	79	237	300	238	266	225	199
YAL010C	117	68	133	319	112	72	98	83	86	334	434	297	338	324	263
YAL011W	110	85	149	866	289	122	234	186	146	993	1111	699	746	624	671
YAL012W	110	87	125	657	397	248	203	170	140	776	929	740	1303	1112	867
YAL013W	104	160	116	712	387	157	250	272	192	604	607	342	455	362	452
YAL014C	50	21	51	139	63	15	42	28	24	243	243	199	296	228	200
YAL015C	158	93	210	234	93	56	68	71	62	283	332	183	240	192	169
YAL016C-A	26	10	31	258	121	51	79	100	83	133	149	113	147	122	114
YAL016C-B	3	1	8	0	1	0	0	0	0	1	1	1	5	0	1
YAL016W	529	161	511	874	412	243	263	278	294	1060	987	998	1140	1003	840
YAL017W	257	114	236	1174	704	361	313	412	410	1878	1730	1330	1669	1351	1095
YAL018C	3	2	7	14	1	0	7	2	1	13	57	11	20	26	18
YAL019W-A	11	43	8	62	25	11	34	31	20	98	143	35	47	32	68
YAL019W	432	274	623	2879	884	452	818	520	577	3586	3977	2767	3477	2853	2763
YAL020C	71	32	86	144	54	25	51	40	49	278	252	172	229	220	218
YAL021C	111	61	105	999	343	160	226	156	156	1918	2062	1611	2044	1656	1534
YAL022C	93	42	89	396	168	75	116	110	90	679	696	639	967	848	699
YAL023C	200	135	197	870	308	134	271	213	262	2521	2545	2299	2566	2201	1862
YAL024C	32	30	34	1563	739	335	523	590	397	2094	2243	1610	1235	1087	1054
YAL025C	1628	1430	3075	2465	1056	531	798	650	676	1747	1904	951	1284	1021	1299
YAL026C-A	144	104	243	290	160	69	76	112	79	138	127	113	133	121	90
YAL026C	218	104	259	1219	326	152	239	204	219	2206	2159	1867	2223	1884	1674
YAL027W	215	76	241	537	296	151	208	231	233	274	317	199	288	217	193
YAL028W	99	32	83	230	133	54	61	73	66	266	355	192	272	272	192
YAL029C	363	125	385	2302	794	456	437	505	417	2706	2723	2266	1927	1825	1506
YAL030W	91	39	47	183	199	93	67	114	95	115	82	83	106	78	61
YAL031C	36	26	33	216	70	35	72	57	56	553	526	433	588	502	402
YAL031W-A	10	1	13	23	7	3	7	4	9	22	26	11	33	24	16
YAL032C	59	40	95	807	332	146	352	248	236	823	874	566	755	655	568
YAL033W	223	214	466	333	116	75	131	126	128	268	339	290	418	413	264
YAL034C-B	6	6	7	70	22	18	15	24	18	62	85	35	34	30	37
YAL034C	104	39	81	246	87	33	77	73	63	489	468	367	489	406	359
YAL034W-A	130	78	162	355	257	97	116	199	146	308	388	213	220	155	168
YAL035W	862	827	1249	7013	2826	1536	2199	1792	1660	5235	5549	3640	4498	3713	3844
YAL036C	110	54	143	348	79	48	77	53	60	724	693	565	667	594	597
YAL037C-A	0	0	0	0	0	0	0	0	0	0	0	0	0	0	0
YAL037C-B	269	127	344	136	36	43	0	19	0	405	332	314	108	182	238
YAL037W	60	31	68	164	29	15	24	23	26	161	146	125	254	185	175
YAL038W	409	205	316	2778	1211	524	753	659	1046	3758	3282	3459	4273	3945	2609
YAL039C	77	55	91	397	104	43	112	60	60	541	514	362	735	583	551
YAL040C	93	60	92	398	77	41	106	33	43	579	544	492	700	580	467
YAL041W	285	159	397	1167	412	218	406	305	309	1475	1576	1306	1585	1321	1197
YAL042C-A	55	35	44	103	91	36	38	57	51	159	229	149	151	125	125
YAL042W	358	210	336	760	371	202	308	270	258	1830	1970	1517	2050	1719	1479
YAL043C	112	65	75	751	238	148	262	133	131	1494	1682	1213	1487	1290	1165
YAL044C	82	47	117	179	162	64	93	110	136	405	408	336	383	341	239
YAL044W-A	20	7	34	25	18	4	11	3	6	89	74	82	120	99	82
YAL045C	18	16	13	191	136	83	80	101	78	27	34	29	24	15	7
YAL046C	17	3	8	46	31	10	15	15	9	58	62	55	74	74	46
YAL047C	133	68	159	520	217	123	152	148	118	381	472	346	359	315	292
YAL047W-A	3	2	1	5	0	0	6	0	0	10	29	11	10	16	17
YAL048C	36	19	35	354	111	63	84	71	69	426	589	378	554	440	416
YAL049C	183	90	278	384	260	162	138	225	203	366	409	262	241	235	196
YAL051W	131	67	120	803	229	118	276	169	183	1470	1530	1195	1646	1352	1191
YAL053W	110	82	136	684	198	89	170	114	145	1719	1446	1494	2692	2077	1699
YAL054C	43	15	48	214	76	31	102	52	99	1604	722	1031	507	515	349
YAL055W	102	65	78	253	248	105	112	229	199	209	200	88	77	43	46
YAL056C-A	17	8	24	59	21	7	15	18	14	60	90	56	81	52	69
YAL056W	519	331	887	1288	488	216	349	329	395	1805	1717	1350	1605	1360	1217
YAL058W	43	47	57	368	153	78	98	95	95	699	794	579	660	550	476
YAL059C-A	0	0	7	185	0	41	85	1	23	59	122	19	27	4	10
YAL059W	923	765	1891	1171	286	145	226	149	164	665	587	614	924	762	613
YAL060W	143	33	89	345	203	114	74	128	107	294	321	264	413	401	293
YAL061W	459	100	144	1019	576	232	211	362	292	678	861	400	671	533	538
YAL062W	78	65	145	389	108	46	118	70	89	780	692	479	809	659	649
YAL063C-A	11	6	12	7	1	2	0	2	0	10	18	12	9	7	5
YAL063C	59	74	103	606	165	74	152	130	95	776	976	474	578	520	594
YAL064C-A	1	1	3	46	10	4	10	2	4	80	71	50	49	49	43
YAL064W-B	4	4	3	69	27	16	18	19	17	71	92	41	57	49	52
YAL064W	6	2	3	7	1	1	5	1	1	5	20	5	1	1	1
YAL065C	2	0	0	10	3	1	1	0	1	29	29	25	26	23	12
YAL066W	0	0	1	2	1	0	0	0	0	5	23	2	1	2	0
YAL067C	14	6	21	126	41	19	55	51	50	167	201	107	76	72	51
YAL067W-A	0	1	0	5	0	0	1	0	0	3	16	0	2	1	1
YAL068C	4	2	3	24	0	1	12	0	3	7	73	27	3	9	8
YAL068W-A	3	0	1	1	0	0	0	0	0	2	18	1	1	1	0
YAL069W	2	6	1	76	15	9	17	8	11	6	107	2	1	5	4
YAR002C-A	283	112	240	1199	1029	494	428	678	516	645	719	643	660	562	470
YAR002W	217	172	324	2698	1216	677	751	734	592	1397	1531	1122	1319	1114	974
YAR003W	507	245	540	454	202	84	143	140	130	487	525	355	325	279	279
YAR007C	237	63	168	348	247	124	164	194	152	949	954	818	718	674	558
YAR008W	445	173	299	227	176	65	119	162	100	441	517	319	236	235	196
YAR014C	272	233	408	1452	472	199	440	306	283	2069	2210	1460	1777	1436	1445
YAR015W	68	53	65	319	222	89	297	226	239	947	1015	907	958	747	644
YAR018C	14	14	23	88	84	12	42	56	28	192	255	152	282	254	241
YAR019C	63	31	75	352	90	47	107	59	68	660	741	490	680	579	541
YAR019W-A	3	0	4	35	4	1	8	9	0	39	85	26	45	39	35
YAR020C	1	0	0	1	0	0	1	0	0	10	9	6	5	5	7
YAR023C	27	8	27	52	13	6	17	23	18	53	85	44	51	53	43
YAR027W	486	93	435	289	183	67	49	114	101	235	257	220	343	278	183
YAR028W	160	27	104	202	56	27	33	50	32	236	254	246	267	253	218
YAR029W	21	4	26	67	15	5	7	19	12	56	67	51	53	43	35
YAR030C	78	31	78	146	140	56	35	93	55	64	80	62	64	41	40
YAR031W	23	10	13	275	107	42	47	90	51	213	268	190	195	178	140
YAR033W	90	20	95	223	109	49	56	86	79	180	274	192	247	179	138
YAR035C-A	0	0	0	0	0	0	0	0	0	0	0	0	0	0	0
YAR035W	15	13	20	530	248	116	215	142	238	1333	773	823	787	709	555
YAR042W	119	56	106	1321	454	211	262	246	237	2145	2207	1616	1998	1564	1474
YAR047C	3	1	4	66	5	5	9	7	12	69	79	73	59	50	48
YAR050W	38	27	34	359	76	33	101	41	62	943	1024	608	637	519	542
YAR053W	34	26	41	47	24	7	22	22	23	49	64	37	39	32	20
YAR060C	3	1	4	18	4	2	3	1	1	46	43	28	21	21	19
YAR064W	3	6	0	14	3	3	0	0	0	27	32	25	24	19	9
YAR066W	5	8	0	70	33	15	17	27	19	207	186	88	148	120	112
YAR068W	5	4	7	66	19	10	0	8	15	164	158	74	80	109	113
YAR069C	1	5	3	7	2	1	1	1	0	5	12	2	3	4	2
YAR070C	2	1	9	12	1	1	2	1	0	2	10	1	3	8	0
YAR071W	113	40	159	127	53	18	39	20	22	125	230	282	438	323	305
YAR073W	4	5	5	96	9	8	11	2	3	30	157	32	59	44	43
YAR075W	0	2	2	30	4	3	7	2	10	6	35	1	3	3	3
YBL001C	1012	555	1048	872	986	594	437	866	724	445	458	325	382	309	232
YBL002W	42	15	27	163	181	106	122	199	162	438	505	381	232	271	286
YBL003C	95	17	66	83	153	50	65	177	152	357	391	373	405	389	345
YBL004W	1162	1048	2199	6251	1307	749	1261	753	965	7250	7490	6773	8876	7623	7211
YBL005W	112	92	184	564	113	63	117	89	100	842	866	724	1011	901	926
YBL006C	126	72	149	619	194	125	230	136	164	508	576	471	867	664	579
YBL006W-A	1	0	0	0	0	0	0	0	0	0	0	0	0	0	0
YBL007C	247	145	211	1326	634	275	403	355	359	3149	3043	2452	3359	2695	2364
YBL008W-A	1	0	0	11	0	0	4	0	1	13	24	11	6	4	8
YBL008W	55	34	61	533	193	90	167	151	104	897	1051	658	710	642	598
YBL009W	43	29	41	450	128	66	131	111	90	746	857	609	578	540	491
YBL010C	103	29	81	343	203	119	149	159	125	612	623	428	321	277	247
YBL011W	262	634	282	909	224	112	186	142	164	1401	1269	1095	1775	1316	1173
YBL012C	12	10	14	151	30	15	32	23	28	142	167	143	199	161	161
YBL013W	9	3	5	159	54	23	30	17	17	319	258	233	322	257	245
YBL014C	113	76	138	1470	264	161	245	178	161	1726	1803	1414	1671	1395	1365
YBL015W	87	29	87	201	64	27	75	56	91	537	454	425	617	611	493
YBL016W	19	10	16	102	19	8	24	17	19	135	166	101	271	202	182
YBL017C	363	167	391	1972	845	424	481	574	494	3852	3924	3011	3326	2843	2621
YBL018C	69	47	133	47	14	6	22	10	9	140	99	130	196	170	114
YBL019W	118	33	117	188	67	32	70	71	53	300	341	225	252	229	185
YBL020W	150	79	141	730	286	144	232	200	210	1084	1224	870	918	857	737
YBL021C	136	60	152	326	142	68	141	108	117	291	303	205	313	237	216
YBL022C	298	163	352	2203	930	493	609	514	545	2335	2496	1756	2205	1743	1599
YBL023C	213	125	251	1500	660	268	413	412	383	1796	1817	1368	1722	1399	1416
YBL024W	236	183	306	2827	1019	547	813	572	479	2292	2444	1955	2435	2083	1900
YBL025W	41	32	49	318	196	102	173	199	184	312	338	223	271	235	223
YBL026W	307	221	665	207	99	48	70	90	78	178	146	179	370	266	195
YBL027W	1952	995	2255	5243	3043	1527	2497	2232	2685	4108	4444	3328	4700	3793	2914
YBL028C	1120	1356	2344	2710	979	732	958	607	757	570	624	463	772	548	452
YBL029C-A	72	12	54	52	19	21	18	31	24	62	55	44	87	59	47
YBL029W	216	149	344	368	175	108	176	238	207	398	429	352	377	271	278
YBL030C	213	84	225	403	177	80	112	88	120	741	502	433	646	604	491
YBL031W	59	19	32	667	805	359	314	649	364	464	574	412	287	291	237
YBL032W	100	74	143	941	600	273	372	449	303	975	1013	752	901	857	669
YBL033C	77	63	93	621	197	87	188	115	127	883	760	566	1207	896	835
YBL034C	148	81	165	1115	502	206	323	366	272	1659	1805	1477	1354	1216	1098
YBL035C	180	74	95	291	229	118	158	194	131	936	966	832	701	683	579
YBL036C	1305	964	1970	732	296	180	268	242	313	598	647	489	539	461	484
YBL037W	61	61	71	418	148	68	142	123	140	868	885	667	659	650	538
YBL038W	330	100	419	429	158	86	140	159	140	554	593	531	534	489	414
YBL039C-A	0	0	0	0	0	0	0	0	0	0	0	0	0	0	0
YBL039C	407	311	716	1707	381	188	361	177	255	2419	2335	2062	2826	2417	2198
YBL039W-B	32	3	25	8	3	2	1	4	4	11	6	10	13	12	8
YBL040C	656	427	811	369	220	119	144	160	165	441	511	426	428	449	333
YBL041W	382	175	479	638	269	148	210	204	242	693	681	497	621	578	511
YBL042C	81	111	245	565	125	45	105	112	112	1320	1275	1203	2196	1740	1459
YBL043W	41	44	153	521	300	176	93	104	125	412	273	237	373	292	231
YBL044W	0	2	0	5	0	1	3	3	1	6	16	1	5	3	1
YBL045C	192	55	184	363	140	66	87	80	92	595	463	429	477	443	372
YBL046W	145	90	110	747	461	171	266	382	315	744	828	410	435	329	406
YBL047C	607	229	445	2868	1414	711	909	832	863	4512	4310	3389	4432	3657	2988
YBL048W	30	9	38	111	55	30	31	38	30	111	104	92	51	48	46
YBL049W	134	32	168	72	27	14	29	27	32	167	104	103	106	86	80
YBL050W	703	231	755	658	354	235	301	362	361	658	707	526	699	545	517
YBL051C	178	99	156	1029	336	165	253	190	186	1079	1142	916	1002	859	777
YBL052C	139	69	149	546	307	129	149	256	154	834	827	605	422	390	386
YBL053W	188	159	249	270	375	117	146	281	162	107	145	43	29	11	29
YBL054W	239	253	469	3175	821	525	926	364	415	2010	2153	1504	2163	1755	1733
YBL055C	257	148	366	524	110	54	107	54	73	753	752	670	928	778	687
YBL056W	408	145	498	665	321	154	200	193	205	851	777	759	1254	1036	865
YBL057C	324	172	350	739	551	235	288	373	387	412	470	391	605	479	395
YBL058W	371	145	367	836	454	191	255	311	290	1193	1154	915	1220	981	920
YBL059C-A	186	123	248	427	433	189	180	274	227	175	190	161	181	164	96
YBL059W	74	39	82	486	425	182	230	300	245	300	347	237	276	212	215
YBL060W	228	141	273	805	289	149	220	229	213	802	894	541	622	557	542
YBL061C	160	95	236	669	167	78	221	124	137	1306	1300	979	1304	1124	1075
YBL062W	114	116	258	136	42	18	35	36	30	72	78	82	109	102	63
YBL063W	157	60	152	459	231	111	121	200	171	688	847	575	611	564	534
YBL064C	133	15	105	171	108	42	48	85	69	318	217	250	252	249	155
YBL065W	1	1	5	49	10	4	8	4	3	40	63	36	60	45	51
YBL066C	76	57	82	942	342	158	266	223	238	1430	1381	1097	1206	975	1068
YBL067C	388	270	576	1450	391	218	444	318	362	1688	1598	1316	1335	1139	1130
YBL068W-A	4	0	10	12	3	0	0	0	2	0	0	0	4	4	1
YBL068W	178	94	305	695	159	72	192	86	113	626	643	559	825	710	612
YBL069W	96	50	113	320	85	48	118	55	54	710	683	569	761	623	598
YBL070C	10	6	4	117	20	11	28	7	13	159	140	119	150	119	125
YBL071C-B	0	0	0	0	0	0	0	0	0	0	0	0	0	0	0
YBL071C	32	16	64	145	19	13	53	23	24	173	143	131	284	265	198
YBL071W-A	21	6	19	308	190	107	218	143	135	258	230	191	328	266	209
YBL072C	1074	448	1074	3210	2508	937	1473	1603	1705	2204	2130	1887	2749	2213	1781
YBL073W	3	2	7	30	10	2	15	5	6	107	95	71	94	73	81
YBL074C	42	13	25	358	220	92	159	149	126	563	550	428	502	418	449
YBL075C	107	67	163	556	153	70	240	279	254	1831	1354	1009	920	923	845
YBL076C	921	512	1131	3692	1419	757	1192	858	987	4203	4153	3657	4476	4065	3324
YBL077W	259	188	437	135	27	8	19	10	21	83	104	116	245	177	104
YBL078C	251	83	270	307	176	96	85	142	148	167	157	115	159	119	104
YBL079W	363	191	521	2163	571	301	493	379	417	3639	3622	2993	3314	2846	2683
YBL080C	42	17	34	224	153	68	95	189	126	343	451	255	244	221	191
YBL081W	189	174	208	768	253	113	227	87	76	805	963	648	776	684	630
YBL082C	25	20	15	162	35	25	48	27	36	215	257	200	322	361	256
YBL083C	9	3	7	19	3	0	11	1	7	40	52	37	79	64	45
YBL084C	136	62	126	819	227	115	205	136	161	824	750	683	845	675	645
YBL085W	155	69	117	1325	906	391	454	725	531	1580	1698	1207	1445	1173	1086
YBL086C	299	82	163	924	835	401	277	507	396	596	737	436	636	474	435
YBL087C	498	148	411	742	332	185	330	240	374	816	765	814	1167	1044	812
YBL088C	176	81	157	1155	354	185	312	255	244	2369	2492	1963	1982	1817	1697
YBL089W	98	34	90	302	144	63	130	142	137	490	542	378	453	426	351
YBL090W	418	226	604	360	132	75	139	121	129	259	303	234	326	269	222
YBL091C-A	85	29	47	336	336	153	167	264	236	228	263	198	274	257	195
YBL091C	227	145	234	1224	648	349	453	451	430	1142	1266	905	846	722	702
YBL092W	1051	493	1296	2595	1909	936	1686	1615	1943	1648	1870	1661	3105	2350	1659
YBL093C	712	529	992	2467	751	460	807	621	777	1128	1190	851	1405	1001	919
YBL094C	36	24	52	26	8	3	17	11	20	33	24	29	21	24	24
YBL095W	44	18	59	115	60	26	51	60	48	349	304	231	314	288	242
YBL096C	8	7	11	29	8	3	11	6	7	59	62	49	31	24	22
YBL097W	56	40	32	436	206	74	130	228	133	860	1003	508	399	396	562
YBL098W	142	74	164	646	397	187	252	334	271	492	514	345	403	377	304
YBL099W	237	75	198	1040	552	366	429	335	381	1795	1332	1188	1082	1064	895
YBL100C	4	2	6	24	6	0	9	2	9	79	48	64	54	54	53
YBL100W-C	1	2	0	2	0	1	1	0	0	4	6	1	4	1	5
YBL101C	153	115	151	1118	458	245	481	296	368	1754	1838	1244	1625	1313	1241
YBL102W	137	30	113	84	38	13	24	25	31	182	166	182	246	235	158
YBL103C	148	84	162	1179	606	324	459	494	398	1063	1231	788	980	815	788
YBL104C	127	53	117	675	176	102	168	125	109	1190	1232	965	1096	979	863
YBL105C	148	104	175	1580	468	231	390	329	325	2696	2803	2071	2617	2126	2026
YBL106C	107	44	98	481	168	80	134	103	91	657	832	615	595	540	546
YBL107C	1057	586	958	1045	507	298	313	421	385	358	387	279	338	293	260
YBL107W-A	1	0	0	0	0	0	0	0	0	1	3	5	0	1	0
YBL108C-A	2	1	5	16	2	4	5	2	10	2	21	8	3	3	4
YBL108W	0	1	1	0	1	0	4	0	0	1	10	0	2	1	8
YBL109W	2	6	3	135	22	14	40	18	15	6	97	4	0	1	3
YBL111C	6	0	0	0	0	0	5	0	0	0	0	0	0	0	0
YBL112C	8	7	11	10	0	0	0	0	1	5	9	0	0	0	2
YBL113C	113	64	105	278	125	60	97	78	89	602	787	427	352	331	368
YBL113W-A	48	16	13	97	66	22	57	73	13	127	163	100	39	79	57
YBR001C	147	71	145	662	230	139	162	189	172	1234	1185	832	1233	930	951
YBR002C	166	106	271	928	365	184	361	295	250	981	981	718	860	686	670
YBR003W	114	37	101	380	190	103	102	138	94	494	553	346	365	374	350
YBR004C	218	77	306	168	42	25	38	24	32	291	297	367	473	478	329
YBR005W	47	23	52	135	59	15	43	20	46	233	236	211	688	467	409
YBR006W	284	109	465	487	280	159	121	203	167	480	474	439	954	763	661
YBR007C	92	70	121	889	218	122	320	230	162	1373	1471	1101	1104	985	958
YBR008C	28	12	30	163	22	19	48	26	26	314	341	258	286	247	238
YBR009C	168	56	243	110	137	39	71	130	167	265	241	214	330	309	239
YBR010W	275	115	317	397	289	143	222	298	284	725	784	683	981	844	637
YBR011C	278	136	266	2058	1105	671	658	745	629	1385	1359	1241	1169	1023	766
YBR012C	45	11	59	60	8	0	7	1	4	54	60	51	81	62	54
YBR013C	61	28	60	45	13	10	11	14	18	66	74	71	85	77	43
YBR014C	603	231	652	920	488	266	286	320	318	625	644	504	625	528	409
YBR015C	275	116	336	915	292	150	265	219	208	1918	1934	1724	1980	1707	1385
YBR016W	174	129	143	662	452	205	297	209	221	421	411	328	629	412	382
YBR017C	381	213	424	1971	688	361	518	383	391	2425	2501	1985	2478	2094	1975
YBR018C	18	7	8	37	14	11	14	16	14	29	80	16	38	31	33
YBR019C	7	8	6	94	13	9	23	22	10	175	257	156	227	193	194
YBR020W	10	7	26	144	38	18	32	28	17	185	244	128	169	164	156
YBR021W	81	95	200	492	149	65	140	142	110	776	892	674	842	749	640
YBR022W	183	113	256	199	53	32	44	49	54	214	196	191	263	224	200
YBR023C	346	273	424	1366	393	208	387	276	305	2746	2702	2268	2562	2220	1992
YBR024W	143	28	193	112	32	7	18	27	33	163	157	137	151	107	86
YBR025C	548	228	558	2850	1062	602	1089	894	888	2330	2489	1984	1951	1777	1611
YBR026C	189	49	158	120	100	46	27	89	70	338	269	242	184	214	135
YBR027C	17	10	20	18	3	4	6	6	6	6	29	2	7	3	2
YBR028C	110	71	219	1076	412	233	285	264	209	1038	1085	839	1012	873	833
YBR029C	160	124	319	691	155	70	114	71	76	607	567	605	1210	1054	780
YBR030W	98	60	134	946	339	157	240	150	131	763	782	645	1114	954	865
YBR031W	378	200	427	962	422	243	382	228	295	1650	1394	1518	2033	1942	1500
YBR032W	6	3	22	30	1	0	4	2	3	39	35	34	45	46	34
YBR033W	71	32	91	837	108	57	141	146	113	869	788	699	938	839	834
YBR034C	387	247	722	2473	545	341	525	264	380	1468	1418	1287	2293	1751	1525
YBR035C	204	45	206	286	134	57	81	76	92	321	312	260	427	358	279
YBR036C	172	92	208	285	98	42	70	61	88	642	587	576	829	737	577
YBR037C	101	36	76	351	228	105	122	163	110	351	483	264	247	240	215
YBR038W	13	22	17	179	73	30	100	78	88	206	504	150	431	417	412
YBR039W	211	74	203	918	594	358	415	543	479	1147	850	809	766	694	512
YBR040W	2	4	6	12	0	1	8	0	2	17	51	11	16	15	9
YBR041W	213	99	273	755	248	169	231	191	189	953	957	801	849	716	656
YBR042C	307	192	389	388	128	58	94	81	86	439	488	451	538	441	374
YBR043C	216	102	250	717	274	130	260	205	242	1472	1620	1258	1157	1061	973
YBR044C	117	43	147	333	168	74	107	105	103	449	484	383	404	348	300
YBR045C	107	94	138	287	123	62	99	67	81	497	439	306	688	516	518
YBR046C	110	80	156	131	59	18	77	36	44	356	310	192	748	483	564
YBR047W	380	215	591	145	84	42	129	92	109	118	190	114	342	245	219
YBR048W	427	242	441	1213	773	480	978	636	549	1404	1566	1222	1397	1315	1031
YBR049C	155	79	124	1868	1009	534	724	635	611	2030	2104	1510	1474	1373	1228
YBR050C	68	24	72	444	111	61	98	137	170	495	305	306	250	205	169
YBR051W	7	7	14	129	28	14	38	50	78	105	62	57	41	31	26
YBR052C	353	72	282	226	102	55	52	100	100	210	200	176	262	229	188
YBR053C	200	30	87	221	152	80	59	120	104	298	317	206	145	164	122
YBR054W	1069	201	711	811	529	278	257	493	335	1700	951	1159	973	1007	790
YBR055C	198	101	224	1981	512	295	601	378	453	1800	1858	1387	1666	1396	1412
YBR056C-B	5	0	15	13	4	1	3	2	1	29	25	17	56	62	46
YBR056W-A	16	18	23	33	5	5	8	2	9	31	41	43	117	86	57
YBR056W	785	162	576	175	100	57	49	86	99	396	359	287	349	369	236
YBR057C	297	197	449	1293	479	223	397	305	292	895	871	686	805	640	601
YBR058C-A	676	585	772	308	358	110	128	214	160	67	64	72	116	93	73
YBR058C	122	74	168	973	259	134	244	154	170	1245	1166	1068	1289	1183	985
YBR059C	179	63	157	1271	681	326	430	392	388	1709	1802	1299	1368	1186	1098
YBR060C	95	60	87	861	312	154	282	215	188	846	906	757	724	603	607
YBR061C	125	54	196	419	80	54	110	55	69	491	509	512	717	630	547
YBR062C	559	232	512	322	133	63	97	133	124	242	247	193	312	274	249
YBR063C	90	53	150	288	47	21	42	23	37	475	415	399	469	419	346
YBR064W	10	6	5	67	16	4	15	9	12	45	59	46	39	34	34
YBR065C	28	21	48	677	209	110	164	130	110	772	691	571	753	577	564
YBR066C	317	238	505	907	298	173	420	560	443	659	794	632	610	460	387
YBR067C	343	168	510	611	130	38	147	75	109	394	421	375	942	854	592
YBR068C	473	306	520	3242	1249	688	954	598	794	3104	3329	2687	4149	3293	3075
YBR069C	180	98	365	1104	163	78	212	62	126	1297	1046	1209	1659	1523	1269
YBR070C	17	5	7	134	44	17	31	34	30	249	219	194	181	159	139
YBR071W	72	28	18	203	356	172	143	263	165	581	506	342	428	411	338
YBR072C-A	0	2	1	2	0	0	0	0	0	2	10	1	0	0	2
YBR072W	37	14	20	457	247	101	438	1415	376	603	563	516	449	569	353
YBR073W	200	74	192	238	146	52	108	105	77	702	776	571	515	469	418
YBR074W	406	190	470	1402	418	214	321	242	301	2063	2232	1943	2326	1930	1605
YBR076C-A	32	9	25	42	27	9	20	38	23	49	36	33	97	76	56
YBR076W	19	11	30	23	7	4	3	10	3	85	93	62	155	136	105
YBR077C	86	34	91	144	53	34	47	45	53	254	232	211	291	234	173
YBR078W	196	110	147	990	353	200	436	266	317	1668	1424	1573	2162	2065	1690
YBR079C	584	422	622	5388	1707	1015	1642	1066	1062	4956	5880	4172	5474	4573	4447
YBR080C	166	93	166	1075	396	183	286	252	250	1315	1386	1103	1508	1285	1172
YBR081C	238	143	250	2015	995	411	580	721	599	2011	2153	1483	1329	1133	1179
YBR082C	537	308	596	1656	882	477	606	555	546	793	804	640	1064	848	636
YBR083W	46	30	58	812	289	130	248	172	169	598	647	426	592	486	461
YBR084C-A	1329	979	1795	6173	3959	2108	3433	3602	3791	3555	4097	2800	3650	3017	2335
YBR084W	480	171	547	1931	416	226	396	230	293	3558	3393	3113	3423	3274	2855
YBR085C-A	459	250	799	366	104	86	85	99	118	210	209	160	335	262	219
YBR085W	26	9	18	106	27	14	30	17	17	88	182	86	112	99	115
YBR086C	350	140	269	987	718	374	482	553	520	2103	1925	1612	1460	1408	1089
YBR087W	99	32	81	156	94	41	49	33	47	216	221	213	224	211	160
YBR088C	71	8	18	56	65	41	36	40	28	274	238	252	169	220	139
YBR089C-A	612	294	745	738	560	250	327	437	477	282	263	208	381	276	246
YBR089W	5	0	0	23	54	8	0	34	27	18	18	29	40	20	27
YBR090C	180	107	229	632	248	173	260	237	298	194	213	142	199	131	121
YBR091C	49	22	71	74	37	11	14	18	15	88	56	63	164	121	74
YBR092C	74	45	95	173	67	30	57	35	31	443	496	462	706	692	550
YBR093C	216	107	346	308	56	22	46	53	87	254	446	469	1350	930	778
YBR094W	134	44	186	493	167	92	116	105	109	751	767	614	523	529	435
YBR095C	244	153	345	1411	485	310	531	430	433	956	909	711	918	753	727
YBR096W	238	60	265	94	33	14	19	27	23	161	128	142	247	245	190
YBR097W	183	71	247	484	233	127	127	176	144	811	857	658	559	521	416
YBR098W	72	37	89	740	551	239	342	548	345	824	885	665	529	496	470
YBR099C	3	0	20	0	0	0	0	0	0	0	0	0	0	2	0
YBR101C	316	140	334	761	219	140	169	121	119	709	641	646	881	715	645
YBR102C	68	38	92	659	214	111	175	146	114	1175	1159	850	937	754	770
YBR103C-A	0	0	2	1	0	0	1	0	0	4	1	1	2	3	4
YBR103W	130	53	189	423	184	84	141	134	114	651	650	434	497	365	429
YBR104W	209	118	544	343	156	66	51	69	54	424	440	384	513	446	434
YBR105C	213	140	281	2906	637	418	981	482	566	2449	2272	1896	3547	2581	2253
YBR106W	548	274	702	780	412	180	275	219	250	1026	997	985	1903	1413	1033
YBR107C	59	14	32	201	115	38	61	83	62	331	354	241	284	264	225
YBR108W	84	31	53	543	227	79	141	92	125	1177	1264	702	1044	829	813
YBR109C	212	67	270	373	315	135	125	165	139	349	292	298	405	366	300
YBR109W-A	3	1	4	19	6	5	13	6	0	48	62	42	19	21	26
YBR110W	183	65	201	367	248	175	192	226	194	584	604	521	513	531	416
YBR111C	751	151	632	624	361	223	169	257	262	455	437	381	420	341	275
YBR111W-A	269	156	396	226	102	76	78	94	97	125	128	126	155	127	94
YBR112C	256	171	292	2264	1071	435	561	648	472	2886	3262	2411	2503	2161	1987
YBR113W	10	6	5	271	97	52	55	27	26	223	255	231	232	145	171
YBR114W	99	77	147	1691	418	177	252	146	177	1720	1765	1068	1726	1304	1360
YBR115C	38	12	68	554	118	54	238	53	99	1633	1553	1314	1357	1244	1142
YBR116C	14	13	39	130	31	13	48	20	18	83	101	60	96	75	68
YBR117C	17	1	7	147	34	18	50	57	42	439	418	265	275	338	265
YBR118W	1456	558	1312	4099	1932	949	1267	1383	2123	4421	3585	4051	6352	5589	3937
YBR119W	256	107	263	717	406	196	241	348	336	435	470	366	573	458	433
YBR120C	298	165	439	402	168	110	166	190	197	263	307	271	387	286	249
YBR121C-A	0	0	0	0	0	0	0	0	0	0	0	0	0	0	0
YBR121C	965	434	1118	3039	916	543	953	583	816	3004	3053	2489	2758	2492	2286
YBR122C	261	97	268	893	629	342	384	492	405	404	455	340	400	327	282
YBR123C	157	81	165	588	384	167	261	290	200	732	819	555	534	438	401
YBR124W	4	5	1	96	39	23	26	30	33	61	90	51	44	47	51
YBR125C	85	30	109	362	93	69	103	76	84	530	547	382	370	337	298
YBR126C	432	126	269	724	600	249	241	457	342	1134	1085	921	1362	1168	920
YBR126W-A	44	10	46	69	66	27	28	39	55	54	42	47	59	50	36
YBR126W-B	13	3	10	10	8	2	6	5	6	16	9	15	30	23	15
YBR127C	544	231	477	3558	1833	1022	1082	1205	1054	2479	2665	2330	2160	1989	1662
YBR128C	166	44	113	90	88	49	40	102	60	164	184	112	112	103	73
YBR129C	324	165	440	297	78	35	107	53	95	408	388	431	537	443	317
YBR130C	77	39	74	1249	618	361	358	399	284	763	776	677	725	627	510
YBR131C-A	0	0	0	0	0	0	0	0	0	0	0	0	0	0	0
YBR131W	102	51	127	558	231	116	156	174	164	590	648	435	504	443	418
YBR132C	109	62	101	385	116	50	104	65	100	731	722	517	838	754	606
YBR133C	89	49	93	701	223	118	142	152	120	1098	1077	894	1114	1069	925
YBR134W	3	1	1	21	0	1	3	0	3	60	62	47	66	52	51
YBR135W	69	35	62	287	177	71	122	98	85	262	278	222	351	282	213
YBR136W	76	31	72	1095	282	144	204	184	171	1747	1787	1443	1463	1300	1204
YBR137W	154	41	179	92	38	26	37	41	36	144	128	120	141	136	90
YBR138C	14	12	13	44	46	10	25	47	22	91	131	69	110	100	98
YBR139W	152	38	87	468	355	181	129	263	226	711	497	436	557	520	404
YBR140C	437	225	566	2652	546	323	492	409	482	4813	4009	3760	4151	3695	3353
YBR141C	39	29	61	521	112	47	116	50	45	540	499	429	871	656	616
YBR141W-A	0	0	0	0	0	0	0	0	0	0	0	0	0	0	0
YBR142W	524	336	932	2336	532	317	525	292	321	1793	1684	1557	2057	1718	1604
YBR143C	999	419	1470	1801	737	495	564	480	528	1804	1693	1506	2068	1746	1472
YBR144C	9	2	14	37	3	0	9	3	3	15	39	14	23	18	17
YBR145W	74	21	83	138	40	18	28	51	39	162	213	141	268	229	196
YBR146W	86	45	107	1054	596	303	378	387	334	597	620	453	575	490	434
YBR147W	250	80	290	310	231	113	191	234	256	246	243	210	249	180	133
YBR148W	64	28	52	162	57	23	26	35	39	247	262	120	152	126	114
YBR149W	202	53	142	616	429	226	184	220	279	675	656	526	712	607	467
YBR150C	190	146	318	1062	282	135	267	192	225	1107	1145	942	1634	1202	1161
YBR151W	468	150	435	533	249	131	195	195	249	547	605	499	639	535	496
YBR152W	69	65	88	1109	359	217	374	244	206	866	968	588	791	629	649
YBR153W	70	27	89	258	78	37	70	50	39	338	388	294	332	278	257
YBR154C	1507	711	1721	1027	313	205	323	219	256	801	836	781	801	688	672
YBR155W	195	154	430	1142	272	147	225	138	120	957	939	572	811	678	676
YBR156C	21	16	11	439	298	142	176	245	124	675	765	509	481	435	408
YBR157C	68	27	66	255	171	95	365	591	330	596	528	459	301	276	225
YBR158W	18	19	33	479	249	107	82	68	87	1325	759	944	703	763	674
YBR159W	383	117	428	253	115	57	53	60	56	480	471	484	485	434	329
YBR160W	99	41	73	354	229	109	153	164	161	475	482	377	470	423	333
YBR161W	88	18	71	142	118	42	59	93	63	294	316	255	143	182	143
YBR162C	32	35	50	384	173	84	118	110	111	1040	795	690	686	629	553
YBR162W-A	469	459	842	617	512	187	276	400	340	296	321	235	365	291	188
YBR163W	92	47	113	804	204	127	206	183	172	755	760	630	799	742	583
YBR164C	475	257	732	201	54	25	47	41	63	340	291	277	367	298	285
YBR165W	328	165	553	882	363	204	291	314	337	492	533	453	773	604	491
YBR166C	510	176	715	325	84	44	80	49	60	557	563	486	594	555	515
YBR167C	184	65	230	184	88	38	57	55	43	117	122	103	205	172	138
YBR168W	90	26	102	112	69	29	29	47	34	230	235	193	158	148	144
YBR169C	376	132	288	948	407	258	317	551	411	1460	1342	1036	1183	1027	879
YBR170C	112	49	116	428	146	81	137	87	73	824	934	593	700	638	598
YBR171W	256	200	364	798	369	235	260	244	231	643	710	550	672	542	451
YBR172C	338	305	450	2373	881	462	828	675	633	2279	2435	1796	2004	1648	1566
YBR173C	317	154	398	945	751	271	310	344	352	332	370	333	504	447	363
YBR174C	11	5	8	38	20	5	12	3	4	32	58	27	35	36	30
YBR175W	138	64	256	147	58	23	33	34	36	273	333	247	282	259	229
YBR176W	73	32	97	109	39	24	23	19	22	181	182	148	198	184	171
YBR177C	210	93	191	592	276	182	146	120	113	626	676	496	1238	965	906
YBR178W	2	4	6	36	5	6	4	1	1	49	68	41	58	39	53
YBR179C	124	64	124	689	252	144	237	204	184	1152	1006	891	1095	915	855
YBR180W	10	6	10	134	41	25	79	38	45	188	299	154	142	153	145
YBR181C	3333	1115	3061	2065	1103	630	1121	1104	1421	2126	2172	2018	2194	1960	1427
YBR182C-A	0	0	0	5	0	0	1	0	0	10	9	5	7	5	6
YBR182C	9	5	17	154	69	29	83	49	59	442	430	332	556	475	452
YBR183W	386	130	459	227	128	65	89	111	114	271	309	222	369	279	230
YBR184W	23	12	28	113	155	40	58	170	75	211	318	177	118	136	127
YBR185C	75	23	113	252	94	36	54	70	45	172	176	173	237	208	173
YBR186W	25	7	34	78	16	11	31	37	26	152	187	104	125	118	132
YBR187W	247	104	284	275	81	41	107	71	84	724	642	617	639	587	558
YBR188C	131	46	111	239	178	66	125	131	120	268	272	217	213	186	152
YBR189W	1058	423	1056	2862	1433	692	1350	915	1222	2657	2538	2319	3352	2728	2157
YBR190W	2	0	2	33	12	5	15	7	7	51	57	35	45	37	38
YBR191W-A	0	0	0	0	0	0	0	0	0	0	0	0	0	0	0
YBR191W	721	172	755	853	408	202	397	278	369	1303	1173	1289	2216	1911	1354
YBR192W	373	170	510	393	151	77	148	103	146	580	629	482	555	488	467
YBR193C	100	35	99	575	360	195	262	302	279	373	473	309	301	301	246
YBR194W	61	35	76	293	210	122	153	191	175	166	170	129	189	163	122
YBR195C	84	36	132	554	233	107	250	216	172	561	635	518	700	638	564
YBR196C-A	0	0	1	3	1	0	1	0	1	0	4	1	4	3	3
YBR196C-B	0	0	0	4	0	1	1	1	0	3	6	5	2	4	1
YBR196C	806	223	851	1378	482	250	417	430	579	1909	1720	1903	2317	2149	1576
YBR197C	39	18	35	306	106	40	78	55	72	472	509	379	532	407	407
YBR198C	219	145	295	1197	312	148	313	181	206	2052	2133	1521	1761	1458	1452
YBR199W	502	222	548	1188	635	376	501	645	610	1393	1504	1058	1419	1088	1057
YBR200W-A	5	4	11	11	0	0	3	3	8	4	8	6	10	6	3
YBR200W	183	75	215	593	111	69	131	80	85	844	954	716	967	797	745
YBR201C-A	93	52	180	97	30	12	22	47	45	78	80	68	73	66	50
YBR201W	280	143	364	306	374	169	129	343	182	207	229	193	186	161	123
YBR202W	141	76	105	641	325	165	281	237	225	1581	1553	1315	1139	1033	921
YBR203W	170	90	250	646	327	183	255	248	268	952	808	604	826	676	599
YBR204C	39	9	40	110	29	21	28	24	37	235	208	153	195	157	136
YBR205W	64	35	53	362	99	60	106	77	85	654	739	593	548	505	462
YBR206W	16	3	18	60	13	12	27	11	19	123	121	81	97	82	68
YBR207W	165	72	195	370	116	53	117	77	98	566	523	460	780	650	611
YBR208C	94	56	120	819	143	78	207	148	202	2279	2889	2254	5597	4778	4512
YBR209W	0	1	1	5	0	1	1	1	1	7	13	3	4	3	9
YBR210W	311	103	452	148	54	32	46	43	43	161	142	171	222	195	143
YBR211C	370	235	636	662	414	158	194	264	240	321	381	334	423	359	275
YBR212W	84	57	77	639	326	140	195	228	202	1243	1100	898	773	730	647
YBR213W	17	11	18	170	35	27	54	33	23	295	368	221	319	258	236
YBR214W	185	54	107	234	125	61	78	45	68	433	390	289	629	518	414
YBR215W	182	99	180	1155	476	286	336	319	287	1000	1185	811	750	636	645
YBR216C	118	44	117	384	167	97	109	123	121	644	653	522	540	495	430
YBR217W	207	95	275	300	122	62	99	82	75	184	171	166	162	142	123
YBR218C	224	83	193	1640	671	356	382	349	369	2577	2672	2249	2651	2321	1983
YBR219C	8	7	7	16	2	4	5	3	2	30	31	24	44	39	45
YBR220C	37	17	35	130	24	10	17	14	16	376	387	306	555	449	405
YBR221C	135	46	87	924	508	370	307	368	286	899	864	757	660	646	567
YBR221W-A	0	0	0	0	0	0	0	0	0	0	0	0	0	0	0
YBR222C	164	163	296	323	75	34	232	80	109	904	957	805	2133	1818	1551
YBR223C	22	17	22	303	126	60	82	75	52	393	438	282	418	321	291
YBR223W-A	0	0	0	0	0	0	0	0	0	3	0	1	3	5	3
YBR224W	6	4	5	140	88	37	46	61	39	113	135	102	116	95	78
YBR225W	124	85	130	718	216	116	179	149	126	1072	1117	794	1124	888	811
YBR226C	20	14	41	29	5	3	3	2	4	23	25	21	55	42	28
YBR227C	264	91	309	595	160	92	150	120	128	647	685	442	466	428	390
YBR228W	164	77	232	294	79	31	90	75	80	452	499	313	384	320	319
YBR229C	155	76	149	785	582	368	242	357	307	1275	1163	1004	821	826	548
YBR230C	363	225	490	1298	978	441	396	615	706	401	355	317	429	391	267
YBR230W-A	45	7	29	28	23	7	9	23	20	29	26	19	31	15	13
YBR231C	126	135	157	192	62	30	77	42	43	404	434	226	299	233	324
YBR232C	3	6	3	46	48	12	18	30	19	48	75	43	34	30	23
YBR233W-A	130	110	304	125	65	28	40	48	47	145	132	99	150	115	79
YBR233W	48	30	46	338	175	82	94	104	92	371	468	278	264	257	231
YBR234C	127	42	140	403	178	104	119	119	129	633	605	493	499	525	396
YBR235W	89	57	115	439	92	40	83	33	55	1011	981	861	968	803	781
YBR236C	211	126	264	624	325	176	210	266	249	536	601	515	670	503	450
YBR237W	161	133	268	969	274	132	227	199	231	1063	1064	715	957	765	779
YBR238C	131	98	248	1732	339	152	194	124	89	1341	1399	1399	1724	1449	1193
YBR239C	82	62	101	799	238	146	268	153	139	849	932	660	751	648	588
YBR240C	11	23	17	193	38	13	28	42	44	247	267	181	460	370	316
YBR241C	27	11	20	155	57	29	55	46	41	302	244	242	269	238	163
YBR242W	652	295	732	575	251	122	204	179	200	530	538	461	600	543	414
YBR243C	66	64	78	330	70	28	75	51	45	649	659	519	617	558	521
YBR244W	151	74	218	105	52	49	29	10	13	104	118	116	214	152	133
YBR245C	494	360	556	2530	900	503	733	664	593	2524	2721	1868	1765	1555	1451
YBR246W	80	46	90	538	231	158	172	152	85	512	492	460	558	481	418
YBR247C	371	318	673	3931	1423	847	1324	711	642	2007	2242	1689	2010	1754	1704
YBR248C	91	71	101	812	407	206	295	322	208	1231	1445	952	912	758	739
YBR249C	228	83	252	1066	403	195	303	231	267	918	913	873	1185	1086	890
YBR250W	23	11	37	162	30	9	30	28	23	112	194	90	81	104	85
YBR251W	107	40	163	282	102	44	77	76	85	364	367	277	415	329	243
YBR252W	152	59	202	412	134	69	114	100	92	368	334	289	356	318	228
YBR253W	392	261	712	422	332	157	156	199	195	299	274	253	382	258	217
YBR254C	168	66	247	156	71	40	46	41	45	205	239	191	212	180	144
YBR255C-A	142	67	148	144	27	20	31	44	37	121	110	88	128	103	79
YBR255W	179	112	176	547	338	113	167	196	228	805	858	517	501	400	432
YBR256C	605	306	796	624	441	242	169	314	251	525	554	492	684	554	395
YBR257W	557	412	985	876	258	185	267	214	238	555	555	508	793	605	535
YBR258C	177	82	208	70	19	9	19	22	24	112	98	88	106	71	90
YBR259W	129	71	192	449	143	97	119	121	97	470	465	473	410	368	316
YBR260C	73	42	68	729	237	144	227	160	133	814	863	657	871	753	611
YBR261C	38	22	46	394	109	46	125	57	46	476	482	405	654	517	462
YBR262C	265	140	342	290	111	53	117	113	124	216	263	188	325	224	201
YBR263W	127	54	125	566	180	109	179	118	126	1027	960	844	916	969	807
YBR264C	54	21	56	97	28	9	26	23	28	194	195	132	166	149	125
YBR265W	66	31	102	328	97	40	91	59	64	486	480	406	636	545	471
YBR266C	1	46	0	443	450	228	198	320	212	95	136	34	0	0	0
YBR267W	238	204	344	2184	572	339	688	318	348	1586	1690	1221	1947	1646	1532
YBR268W	243	125	330	296	148	68	116	99	121	175	170	120	224	170	151
YBR269C	162	57	122	734	597	298	392	547	543	363	349	244	336	244	217
YBR270C	91	45	105	169	39	14	51	17	19	361	406	262	320	288	246
YBR271W	95	83	159	461	125	55	89	79	67	570	612	424	556	424	444
YBR272C	75	37	98	343	161	76	95	98	88	370	384	258	293	271	288
YBR273C	175	93	209	972	540	254	332	388	378	736	814	546	772	639	585
YBR274W	133	74	182	297	101	49	71	68	73	389	399	292	366	314	269
YBR275C	171	114	133	1144	555	224	356	489	259	2535	2958	2042	1357	1319	1279
YBR276C	160	74	166	352	79	43	97	58	83	852	864	669	591	528	439
YBR277C	19	3	21	200	43	31	65	36	53	94	115	88	50	36	51
YBR278W	550	267	403	892	717	301	370	525	430	376	445	324	476	357	280
YBR279W	488	428	846	2084	1309	617	609	771	693	1235	1267	971	1017	837	776
YBR280C	80	23	75	158	36	15	40	43	42	434	385	255	275	278	210
YBR281C	85	37	90	357	135	62	96	112	70	600	777	475	429	411	368
YBR282W	243	118	263	250	183	81	125	131	118	192	217	163	257	202	175
YBR283C	323	140	411	934	258	192	219	183	224	1384	1345	1401	1491	1374	1136
YBR284W	44	28	31	218	47	34	43	32	41	250	333	156	223	200	163
YBR285W	218	44	254	153	147	48	23	88	79	64	74	40	63	54	46
YBR286W	1076	506	830	2247	1245	727	567	644	627	3382	3256	2838	3462	2931	2335
YBR287W	370	131	445	723	269	136	228	207	255	841	893	729	1385	1038	911
YBR288C	237	105	297	798	432	196	241	270	245	574	657	561	592	532	498
YBR289W	186	102	146	1438	699	302	419	428	402	1872	2227	1420	1648	1361	1293
YBR290W	1466	1153	1969	1534	965	498	640	914	960	988	1113	817	1090	800	778
YBR291C	28	16	27	82	18	5	67	11	25	365	342	385	338	346	286
YBR292C	7	4	9	29	16	2	6	7	6	22	24	15	36	22	26
YBR293W	16	6	30	75	13	5	19	7	5	93	164	70	121	83	90
YBR294W	47	27	34	557	137	96	124	94	91	666	833	531	768	620	577
YBR295W	60	42	86	338	72	33	79	51	59	919	1030	704	1306	1091	1073
YBR296C-A	0	0	0	0	0	0	0	1	0	1	3	0	3	3	0
YBR296C	41	46	117	227	42	18	62	56	55	441	579	619	1617	1118	1004
YBR297W	40	12	45	233	48	19	31	20	44	258	193	154	251	239	184
YBR298C-A	0	0	0	2	0	0	0	0	3	4	9	5	0	0	0
YBR298C	91	38	87	252	64	29	60	62	48	265	311	175	186	154	138
YBR299W	10	6	2	46	7	0	8	18	9	57	127	24	17	7	10
YBR300C	5	0	0	18	0	0	3	0	5	9	58	12	11	9	17
YBR301W	1	2	0	10	2	2	2	3	2	10	37	14	5	11	7
YBR302C	520	209	630	306	130	82	121	144	143	289	305	272	387	281	214
YCL001W-A	6	1	8	57	20	7	11	16	9	27	30	15	25	23	19
YCL001W-B	4	4	10	43	10	3	6	5	6	14	16	12	12	26	21
YCL001W	615	299	872	522	247	142	162	211	186	466	509	466	459	412	291
YCL002C	213	116	287	282	97	58	80	55	79	428	401	386	296	275	245
YCL004W	40	22	38	274	72	49	66	47	45	357	376	324	330	328	277
YCL005W-A	31	9	51	158	59	36	53	40	30	128	132	104	162	141	102
YCL005W	42	29	42	298	177	78	98	65	76	252	300	230	286	231	217
YCL007C	17	13	25	199	38	9	32	18	29	115	151	106	131	104	111
YCL008C	55	36	60	324	130	56	81	67	69	486	533	379	392	356	283
YCL009C	61	27	76	341	199	79	52	60	60	741	693	633	844	839	678
YCL010C	52	39	62	279	134	61	83	76	75	673	700	477	516	429	441
YCL011C	536	333	616	628	138	85	234	132	142	1682	1662	1193	1138	982	1049
YCL012C	72	18	84	116	49	33	27	37	46	153	125	94	111	103	70
YCL014W	52	43	64	920	283	136	207	280	200	1802	2165	1369	1750	1534	1407
YCL016C	131	74	192	653	336	171	241	225	225	485	595	417	525	467	406
YCL017C	111	72	129	716	266	152	228	153	167	1104	1088	752	1068	928	879
YCL018W	2	0	0	0	0	0	0	0	0	0	0	0	0	0	0
YCL021W-A	8	5	5	40	20	6	13	18	12	24	20	27	30	34	25
YCL022C	49	17	8	41	109	37	25	59	42	69	98	57	15	14	19
YCL023C	0	3	2	13	5	2	3	3	4	50	68	43	30	36	21
YCL024W	188	78	83	316	261	141	150	196	161	1350	1501	1005	616	618	420
YCL025C	299	161	539	1701	434	212	490	409	415	2170	2065	1575	4465	3349	3154
YCL026C-A	3	0	4	20	3	0	3	2	3	57	65	40	146	114	114
YCL026C-B	2	0	0	17	5	1	6	1	4	31	40	16	44	55	43
YCL027W	11	9	11	62	18	8	20	11	16	103	206	67	63	66	62
YCL028W	187	110	139	844	414	176	327	232	248	968	1091	669	941	813	775
YCL029C	107	64	127	1149	517	259	366	271	297	874	1084	763	856	713	626
YCL030C	117	72	143	959	622	279	296	400	290	1475	1776	1474	1531	1449	1103
YCL031C	1202	786	1978	1945	665	438	695	481	600	1314	1387	1215	1610	1282	1080
YCL032W	148	63	138	475	201	107	144	151	157	417	505	343	360	277	286
YCL033C	152	23	122	92	114	40	40	42	58	104	82	59	61	91	56
YCL034W	148	61	135	300	188	68	104	104	109	611	577	429	588	488	394
YCL035C	750	187	594	484	426	241	261	521	400	365	362	325	400	312	246
YCL036W	154	110	311	551	126	58	146	65	57	1027	876	688	909	783	797
YCL037C	142	82	109	1529	791	402	659	333	361	2178	2402	1663	2268	1901	1652
YCL038C	256	103	394	145	32	15	24	34	26	317	384	296	616	533	394
YCL039W	188	106	194	334	92	48	91	56	84	597	644	416	531	412	443
YCL040W	442	157	276	1038	634	305	326	550	424	914	1112	907	1831	1536	1224
YCL041C	23	14	14	146	37	24	67	20	21	239	295	212	355	267	228
YCL042W	170	72	85	298	221	86	80	110	125	113	126	138	324	215	186
YCL043C	487	344	508	2230	1064	595	779	619	617	2586	2850	2274	3453	2882	2316
YCL044C	66	81	77	393	134	90	116	89	65	428	527	339	400	341	351
YCL045C	206	113	221	875	322	158	234	161	171	1680	1709	1615	1920	1570	1244
YCL046W	15	11	5	79	12	14	28	14	22	149	188	158	183	146	110
YCL047C	77	52	101	201	161	68	72	118	82	160	151	120	145	127	92
YCL048W-A	10	7	27	9	5	1	2	5	4	19	19	10	20	16	6
YCL048W	24	29	40	73	5	6	19	10	13	35	157	21	28	17	16
YCL049C	167	84	151	711	500	297	249	279	235	609	682	506	601	550	455
YCL050C	282	168	383	2020	1030	645	701	632	566	746	899	716	842	705	613
YCL051W	314	200	335	1124	553	252	400	392	357	918	1083	771	912	782	695
YCL052C	213	72	193	400	151	76	119	113	142	429	429	332	461	362	280
YCL054W-A	0	0	0	0	0	0	0	0	0	0	0	0	0	0	0
YCL054W	1115	1215	2592	4551	1196	600	974	728	749	3472	3664	2396	2950	2313	2520
YCL055W	382	217	535	494	250	123	178	207	195	294	339	292	350	296	242
YCL056C	342	189	604	132	39	19	41	27	30	174	203	117	165	118	121
YCL057C-A	34	22	43	62	27	11	20	25	26	145	112	105	167	174	104
YCL057W	153	51	90	467	239	127	103	122	116	844	932	698	607	668	462
YCL058C	700	585	975	1276	568	298	481	335	388	493	596	336	471	344	353
YCL058W-A	0	0	0	0	0	0	0	0	0	10	0	0	0	0	0
YCL059C	1456	1011	1550	4369	1764	953	1365	853	1148	1370	1532	1193	1668	1303	1186
YCL061C	215	80	111	925	650	292	338	536	303	1836	2003	1333	1114	1021	926
YCL063W	24	27	34	414	242	92	198	231	168	628	656	530	512	443	402
YCL064C	171	185	482	514	425	183	388	388	307	1161	1374	1020	1986	1520	1561
YCL065W	0	4	0	6	0	0	2	0	0	0	18	0	2	3	7
YCL066W	6	4	15	10	1	1	4	1	1	15	25	10	23	28	28
YCL067C	353	151	421	239	64	36	88	40	61	216	262	203	319	237	201
YCL068C	0	1	0	5	0	0	4	0	0	0	55	0	0	0	0
YCL069W	2	2	5	30	7	3	22	3	8	0	56	0	2	3	6
YCL073C	9	10	0	107	15	6	40	17	24	0	221	2	8	2	5
YCL076W	0	0	2	10	1	0	1	0	0	1	39	0	0	0	0
YCR001W	23	12	60	34	8	3	8	4	4	19	38	36	33	40	50
YCR002C	180	114	234	720	510	237	312	385	327	590	577	491	602	538	436
YCR003W	495	328	802	795	487	263	310	438	341	296	369	283	377	333	240
YCR004C	153	42	101	387	227	134	116	146	130	468	519	405	403	377	330
YCR005C	810	214	1488	1502	483	186	336	336	448	1416	975	976	3496	2772	2375
YCR006C	6	2	6	57	11	6	14	7	11	114	117	74	158	127	116
YCR007C	101	38	145	460	170	88	131	111	116	277	339	232	391	312	294
YCR008W	447	209	523	1379	361	208	396	252	295	1749	1630	1270	1486	1291	1289
YCR009C	702	257	828	798	392	178	175	240	246	555	566	535	763	597	525
YCR010C	21	12	34	165	57	28	54	41	63	1033	484	638	227	250	181
YCR011C	477	228	416	1155	573	320	363	484	461	1828	1952	1448	1294	1112	975
YCR012W	148	54	100	802	398	151	212	253	306	1173	1236	1256	1168	1408	867
YCR013C	176	44	80	531	218	149	173	212	211	267	253	207	97	149	142
YCR014C	455	361	844	662	186	85	138	192	173	781	931	596	556	473	482
YCR015C	159	68	263	309	91	42	75	64	73	273	313	252	338	272	233
YCR016W	1373	1025	1943	3086	1330	671	816	598	738	1147	1174	949	1194	955	892
YCR017C	378	266	497	722	199	114	182	173	178	1490	1496	1338	1516	1378	1131
YCR018C-A	223	201	435	245	53	20	62	48	35	151	211	170	273	193	142
YCR018C	79	47	170	108	17	7	38	46	36	136	144	130	189	196	134
YCR019W	94	29	89	247	79	40	88	68	70	340	425	244	366	333	295
YCR020C-A	98	63	163	65	7	10	19	8	14	90	91	69	106	80	62
YCR020C	100	102	205	216	78	34	96	72	97	207	251	184	460	400	390
YCR020W-B	404	475	840	659	466	221	257	281	271	144	171	163	267	214	171
YCR021C	350	74	455	428	167	63	89	156	133	459	335	394	570	540	349
YCR022C	5	8	4	37	6	1	14	3	7	26	38	18	19	22	27
YCR023C	209	57	180	590	265	145	194	192	202	806	944	748	719	632	595
YCR024C-A	38	18	81	43	28	13	24	26	22	53	54	56	72	57	49
YCR024C-B	186	87	452	61	30	10	30	18	39	145	107	129	236	218	128
YCR024C	67	27	62	423	174	116	150	162	138	511	499	378	394	324	347
YCR025C	7	3	11	32	1	2	5	1	2	57	49	37	62	39	40
YCR026C	256	108	202	751	247	140	217	197	217	1878	1816	1352	1945	1469	1462
YCR027C	71	26	87	197	51	24	49	40	43	310	268	228	408	333	298
YCR028C-A	411	185	657	258	122	67	61	101	103	288	269	263	354	304	248
YCR028C	105	61	128	367	93	68	111	82	72	892	867	692	748	712	700
YCR030C	178	62	91	685	371	170	210	191	168	1022	1094	781	784	731	671
YCR031C	595	339	686	1806	1376	657	894	913	1147	1736	1689	1511	2540	2081	1519
YCR032W	501	184	515	1357	374	200	335	272	265	2617	2449	2057	2286	1989	1847
YCR033W	236	180	238	2943	965	473	765	759	701	3420	3701	2596	3171	2536	2642
YCR034W	60	30	88	234	70	32	59	36	54	450	512	543	524	533	453
YCR035C	617	314	883	2268	875	514	639	557	574	1494	1522	1151	1467	1214	1168
YCR036W	473	178	599	551	381	209	204	309	256	529	529	393	559	452	413
YCR037C	111	56	127	839	257	143	223	185	170	1009	1088	763	1225	1048	957
YCR038C	77	58	99	446	187	82	132	153	97	466	597	414	501	461	366
YCR038W-A	0	0	0	0	1	0	1	0	0	4	0	0	2	1	1
YCR039C	353	151	421	239	64	36	88	40	61	216	262	203	319	237	201
YCR040W	6	4	15	10	1	1	4	1	1	15	25	10	23	28	28
YCR041W	112	80	166	124	31	24	26	42	28	69	70	68	75	58	50
YCR042C	491	196	557	1339	480	215	301	281	247	2145	2170	1524	1503	1330	1445
YCR043C	161	82	198	450	184	100	140	138	125	341	364	291	395	333	280
YCR044C	526	173	619	523	316	189	166	239	193	476	569	434	563	461	403
YCR045C	21	8	14	85	16	15	15	16	34	200	214	155	236	228	182
YCR045W-A	3	1	2	2	1	0	0	0	0	0	3	0	5	8	6
YCR046C	17	16	13	121	46	29	39	19	25	195	174	156	236	175	171
YCR047C	118	172	223	451	93	43	132	64	75	1095	1050	613	827	651	861
YCR047W-A	0	0	0	0	0	0	1	1	0	0	0	0	0	0	0
YCR048W	35	17	26	288	98	37	42	37	33	541	633	570	730	695	563
YCR049C	3	8	7	112	48	22	31	13	16	155	188	139	173	131	109
YCR050C	2	1	2	0	0	0	0	0	0	0	3	0	0	0	2
YCR051W	134	93	160	527	177	72	151	84	93	598	620	439	716	576	577
YCR052W	145	104	142	752	375	212	283	197	178	1317	1531	1078	1365	1137	990
YCR053W	464	238	528	1192	340	189	345	164	196	1433	1388	1269	1662	1461	1402
YCR054C	189	83	296	554	202	108	140	147	116	584	608	547	662	548	500
YCR057C	216	189	357	2241	700	394	519	328	367	2811	2723	2230	3171	2704	2550
YCR059C	46	33	35	302	93	51	99	51	49	280	288	237	376	334	297
YCR060W	277	140	319	222	133	46	89	82	84	234	218	188	277	253	189
YCR061W	72	27	40	214	113	39	48	22	44	481	378	273	374	390	305
YCR063W	10	6	9	157	44	29	63	21	30	343	355	284	441	345	339
YCR064C	4	8	3	145	25	25	37	15	14	65	105	46	77	48	71
YCR065W	75	52	59	334	146	71	88	130	105	1016	969	780	810	796	766
YCR066W	139	56	151	465	177	83	170	140	116	483	505	374	410	339	323
YCR067C	55	22	36	362	153	68	93	75	96	815	908	748	762	706	550
YCR068W	33	30	25	301	194	78	158	112	111	739	760	527	939	723	593
YCR069W	77	34	58	292	153	99	97	129	117	600	554	480	430	396	332
YCR071C	185	85	205	528	390	159	231	297	241	227	252	194	266	218	175
YCR072C	108	135	259	722	128	77	185	57	103	1340	1217	1082	1673	1372	1381
YCR073C	62	51	106	757	194	109	172	117	102	1307	1151	959	929	904	802
YCR073W-A	59	25	42	156	66	32	64	30	44	288	270	165	267	242	219
YCR075C	16	1	14	29	18	8	11	10	6	74	81	55	50	49	41
YCR075W-A	50	17	36	40	11	5	5	10	16	11	20	9	19	18	9
YCR076C	165	72	216	174	94	49	68	64	75	275	272	189	231	193	168
YCR077C	386	228	551	750	297	142	150	107	129	1511	1580	1331	1410	1269	1163
YCR079W	133	42	138	218	71	43	76	47	61	387	378	268	346	291	256
YCR081C-A	2	2	3	16	1	0	3	0	0	16	29	20	5	4	1
YCR081W	84	40	110	970	427	224	306	268	247	1105	1130	965	1072	938	827
YCR082W	593	485	1054	510	269	138	180	175	216	320	321	282	458	333	277
YCR083W	154	84	243	628	524	314	275	341	356	231	235	174	213	186	143
YCR084C	254	179	219	1562	831	395	400	405	346	2459	2778	2063	2307	1950	1844
YCR085W	5	4	6	20	0	1	4	2	4	8	25	8	17	9	8
YCR086W	38	16	43	154	49	23	46	39	37	136	153	105	183	155	135
YCR087C-A	0	0	0	0	0	0	0	0	0	0	0	0	0	0	0
YCR087W	1085	538	1156	1597	587	229	520	206	372	901	1016	848	1322	985	856
YCR088W	167	89	100	818	537	249	209	206	193	1320	1340	1002	1176	1061	848
YCR089W	47	47	51	556	110	55	144	44	79	534	1068	420	493	506	467
YCR090C	223	90	315	139	65	25	38	36	33	153	148	176	240	212	161
YCR091W	98	32	78	449	247	118	118	185	134	646	671	459	509	447	391
YCR092C	234	129	277	826	319	144	262	236	217	1353	1475	1026	1094	1026	910
YCR093W	247	106	218	2552	644	287	472	289	392	4229	4341	3628	4035	3575	3176
YCR094W	78	48	94	448	164	109	138	125	122	607	633	529	654	537	487
YCR095C	687	357	1065	874	301	214	248	218	283	651	662	569	668	503	460
YCR095W-A	2	1	4	41	14	14	19	17	12	25	32	31	44	34	34
YCR096C	136	68	215	120	48	23	48	50	52	150	106	130	230	179	144
YCR097W-A	0	0	0	1	0	0	0	0	0	0	1	2	0	2	0
YCR097W	705	514	1097	503	184	106	140	147	168	245	243	242	375	305	220
YCR098C	84	55	152	153	33	19	41	32	26	125	257	103	219	172	160
YCR099C	30	9	16	96	39	19	25	23	18	97	99	53	44	54	39
YCR100C	18	6	11	68	27	13	19	11	14	96	118	68	75	69	61
YCR101C	22	2	12	114	76	65	36	41	39	114	117	73	108	82	87
YCR102C	48	22	52	19	8	0	5	1	4	22	67	21	39	32	29
YCR102W-A	1	0	1	1	0	0	1	0	0	0	3	0	2	0	2
YCR104W	0	0	0	13	0	0	4	0	0	0	17	5	2	2	4
YCR105W	26	9	21	149	37	32	43	41	31	99	208	96	130	145	80
YCR106W	11	11	23	273	57	32	54	34	41	344	565	319	555	461	431
YCR107W	58	28	71	213	59	34	43	36	38	235	347	204	287	244	245
YCR108C	0	2	6	51	10	11	21	7	12	4	101	0	4	3	4
YDL001W	215	118	345	670	252	114	190	227	214	557	606	395	490	409	390
YDL002C	825	399	996	1898	835	470	636	743	693	633	748	550	616	481	451
YDL003W	116	30	50	429	1024	336	248	775	299	1277	1297	963	780	752	621
YDL004W	262	47	210	243	169	94	107	126	108	399	359	307	253	244	176
YDL005C	287	199	364	2176	1303	683	613	679	675	884	966	694	766	590	578
YDL006W	280	97	288	375	253	82	119	169	130	371	393	291	344	310	246
YDL007C-A	0	1	0	1	0	0	0	1	2	1	3	0	0	0	0
YDL007W	2649	1370	3065	1545	734	418	455	540	646	1512	1536	976	1345	1127	1060
YDL008W	169	75	196	252	92	50	72	62	68	261	290	209	348	267	227
YDL009C	92	53	110	74	20	13	22	20	21	72	74	56	77	56	62
YDL010W	357	193	415	811	530	277	316	459	411	762	811	511	695	497	510
YDL011C	11	3	11	63	21	18	26	14	25	46	54	36	64	57	60
YDL012C	74	51	84	328	199	99	118	96	84	210	202	173	363	296	244
YDL013W	111	77	116	865	307	149	366	273	218	1494	1658	1016	1345	1115	1208
YDL014W	591	396	864	1239	302	157	292	123	204	2041	1909	1675	2214	1803	1903
YDL015C	321	99	350	379	96	73	102	81	84	633	579	682	707	666	527
YDL016C	24	12	35	15	0	1	3	4	3	27	29	32	53	43	36
YDL017W	75	27	40	255	99	51	97	90	75	455	501	370	342	291	290
YDL018C	364	104	201	304	380	164	161	264	212	511	505	454	305	359	237
YDL019C	296	89	186	1191	776	342	253	409	374	1754	1616	1118	1287	1167	990
YDL020C	313	224	478	2486	516	284	537	402	459	1512	1614	1273	2380	1664	1551
YDL021W	207	37	117	219	140	74	86	268	174	222	283	201	157	173	127
YDL022C-A	0	0	1	14	3	6	0	3	4	7	9	3	6	5	5
YDL022W	202	55	134	602	205	107	249	186	198	1190	1189	880	792	706	622
YDL023C	31	10	20	78	14	11	66	31	15	338	396	263	196	149	132
YDL024C	28	12	18	197	34	19	40	26	19	234	312	167	252	203	177
YDL025C	157	98	202	534	213	102	198	190	190	870	865	746	1021	816	691
YDL025W-A	0	0	1	1	0	0	0	0	0	3	1	0	2	0	3
YDL026W	27	7	18	33	9	8	12	4	8	39	33	28	40	29	25
YDL027C	305	82	340	192	93	48	73	103	94	287	208	214	252	211	148
YDL028C	122	86	197	665	174	94	197	153	168	1017	1077	814	882	773	778
YDL029W	175	40	134	542	350	156	160	233	237	671	640	522	647	617	460
YDL030W	156	88	210	763	271	136	192	206	177	652	643	481	592	504	499
YDL031W	512	381	810	4014	904	416	822	430	535	3376	3595	2916	3573	2951	2767
YDL032W	3	0	0	56	4	7	15	6	9	56	60	43	59	43	46
YDL033C	22	21	23	412	125	55	97	96	70	606	600	490	813	622	538
YDL034W	1	0	1	16	2	1	1	1	1	26	35	18	49	36	26
YDL035C	264	147	254	1463	512	291	415	349	375	2107	2028	1679	1841	1474	1350
YDL036C	99	54	147	889	233	127	211	147	162	706	756	585	725	619	562
YDL037C	47	19	62	389	46	20	54	16	25	399	326	322	667	554	449
YDL039C	92	42	150	1725	213	143	214	76	100	1277	1088	978	1505	1275	1087
YDL040C	222	120	239	2936	1072	633	797	701	539	2193	2269	1972	1994	1717	1624
YDL041W	12	23	6	262	105	64	148	91	104	103	119	97	80	52	68
YDL042C	161	89	190	516	104	54	113	62	85	835	814	760	869	843	729
YDL043C	257	107	359	351	132	63	115	79	88	369	363	303	367	319	276
YDL044C	271	114	375	800	396	206	284	307	286	679	750	569	649	554	497
YDL045C	259	87	321	353	178	76	122	129	141	423	432	308	448	330	336
YDL045W-A	76	59	133	291	182	78	107	118	115	179	174	173	287	246	204
YDL046W	139	92	141	391	173	82	107	76	104	353	309	286	528	463	342
YDL047W	62	31	67	346	55	46	86	46	37	753	687	570	672	618	549
YDL048C	507	255	475	1882	316	174	398	216	225	2211	2139	1874	2237	1676	1392
YDL049C	111	66	236	674	140	49	150	115	121	491	419	353	1074	680	594
YDL050C	185	142	379	193	46	17	61	41	52	70	68	99	187	173	111
YDL051W	868	404	1225	1965	634	318	669	342	409	1165	1263	1096	1423	1155	1014
YDL052C	72	34	58	247	88	34	70	39	47	440	502	364	533	468	399
YDL053C	246	174	363	1195	797	430	519	488	434	810	898	685	765	668	600
YDL054C	53	28	59	190	56	18	42	31	35	388	347	335	447	384	316
YDL055C	348	131	473	1044	540	275	401	430	475	2579	1657	1829	1948	1963	1399
YDL056W	313	257	427	1389	554	319	388	440	401	1454	1523	1213	1318	1135	1038
YDL057W	42	23	36	128	52	22	37	54	49	247	279	161	187	172	155
YDL058W	695	427	832	4269	1884	961	1063	1489	1194	3344	3543	2503	2083	1865	1819
YDL059C	69	51	68	192	117	63	73	113	86	189	217	121	166	111	110
YDL060W	389	245	490	2278	783	405	874	419	471	2544	2681	1978	2269	1979	1958
YDL061C	290	247	478	897	514	365	707	578	615	538	600	400	782	544	442
YDL062W	38	22	34	705	257	123	203	144	144	115	163	123	174	122	101
YDL063C	388	272	685	1076	260	143	289	129	165	1363	1324	1327	1740	1463	1208
YDL064W	188	95	227	299	107	58	122	66	74	325	343	281	419	355	309
YDL065C	1373	669	1531	1106	657	331	427	576	572	865	892	484	476	370	457
YDL066W	175	44	202	406	228	127	122	117	123	774	757	635	746	819	604
YDL067C	212	156	253	59	38	26	35	30	46	100	87	73	137	104	87
YDL068W	43	21	62	134	52	61	70	111	94	83	74	55	78	55	59
YDL069C	91	59	205	172	199	57	75	135	91	62	73	65	149	117	87
YDL070W	797	650	1161	2051	551	322	386	406	302	1710	1589	1436	1964	1472	1408
YDL071C	17	8	9	169	37	19	45	27	28	128	190	98	116	96	91
YDL072C	453	117	445	532	444	271	190	265	282	446	461	388	461	377	327
YDL073W	253	151	367	906	317	173	285	252	296	1030	1078	856	787	726	736
YDL074C	1047	656	1687	3655	1493	885	1340	1240	1235	2534	2555	2069	2422	1966	1847
YDL075W	2106	852	1994	1950	1387	571	958	1352	1140	1186	1093	1054	1777	1446	1099
YDL076C	360	140	404	436	208	105	207	180	229	484	569	398	505	398	360
YDL077C	95	20	69	350	204	81	189	192	161	809	864	693	534	580	461
YDL078C	672	298	941	810	500	290	321	421	475	1035	870	770	701	631	487
YDL079C	378	175	505	651	233	91	130	173	186	589	540	408	505	399	361
YDL080C	93	37	62	400	114	44	139	89	92	852	847	629	826	704	711
YDL081C	847	420	942	841	433	232	417	327	449	958	808	799	1227	1023	801
YDL082W	642	320	752	1821	765	503	854	522	674	1939	1951	1878	2176	2077	1599
YDL083C	451	153	403	404	230	95	165	110	171	404	337	423	724	713	507
YDL084W	1011	521	1438	1785	762	418	552	446	534	1561	1581	1568	1684	1577	1206
YDL085C-A	222	157	311	467	488	239	221	442	301	183	203	169	161	136	84
YDL085W	15	18	15	192	66	29	107	116	124	1116	551	561	224	231	166
YDL086C-A	0	0	0	0	0	0	0	0	0	0	0	0	0	0	0
YDL086W	79	31	74	245	99	80	87	88	84	429	446	380	331	326	261
YDL087C	36	22	33	213	60	24	67	47	49	457	498	324	550	395	381
YDL088C	172	99	217	1313	668	315	472	420	356	938	1011	893	1001	850	777
YDL089W	117	51	100	233	96	45	69	69	81	395	372	322	356	296	248
YDL090C	112	29	102	218	134	51	95	84	73	363	373	273	266	232	191
YDL091C	298	77	305	732	573	299	267	495	425	570	620	415	370	335	276
YDL092W	818	459	878	897	372	188	307	289	315	439	428	343	534	439	382
YDL093W	62	18	45	198	31	16	46	36	37	693	748	605	483	420	345
YDL094C	1	2	8	15	2	1	2	1	2	26	40	32	32	21	24
YDL095W	305	171	250	922	396	200	314	366	306	2224	2246	1819	1737	1535	1330
YDL096C	6	6	0	257	149	50	54	73	61	31	43	31	27	29	27
YDL097C	513	217	632	846	359	163	230	134	185	791	784	649	919	817	737
YDL098C	181	137	372	331	79	57	110	88	94	312	303	265	319	239	228
YDL099W	801	524	944	1890	986	454	501	676	676	735	786	524	430	353	391
YDL100C	743	384	730	2980	2079	1095	989	1051	989	1033	1191	973	1160	1031	761
YDL101C	83	28	55	178	198	72	64	131	77	429	471	385	383	332	259
YDL102W	157	87	198	1159	335	209	273	293	255	1401	1451	1108	1113	967	941
YDL103C	167	62	158	323	130	64	84	77	68	564	549	475	472	477	384
YDL104C	73	54	88	154	65	35	49	54	45	229	281	133	146	163	138
YDL105W	54	31	34	297	262	118	140	177	142	410	445	343	357	279	266
YDL106C	202	102	172	922	589	311	428	422	364	859	980	732	884	736	658
YDL107W	198	72	197	204	91	48	70	101	80	246	268	168	167	174	133
YDL108W	84	52	128	342	128	80	118	96	97	362	400	300	512	379	336
YDL109C	33	29	19	226	78	37	73	57	54	477	603	365	392	341	350
YDL110C	282	85	260	525	524	232	204	379	315	403	389	234	358	260	269
YDL111C	93	47	157	687	220	119	149	86	104	493	475	466	752	634	559
YDL112W	607	443	866	2042	456	265	395	296	280	2535	2721	2223	2636	2292	2153
YDL113C	227	131	335	733	319	185	208	283	311	907	808	634	883	629	598
YDL114W-A	3	0	3	3	1	0	1	2	1	3	2	2	4	3	3
YDL114W	3	1	7	42	6	3	10	8	13	49	93	22	25	28	22
YDL115C	920	423	929	391	152	95	142	145	165	631	591	412	490	362	417
YDL116W	315	137	495	803	205	121	176	146	186	1019	961	972	1102	996	830
YDL117W	90	49	98	1585	707	323	405	380	292	1460	1352	1222	1219	1043	957
YDL118W	38	11	37	84	40	26	39	54	37	41	66	37	58	42	38
YDL119C	55	3	45	71	31	7	5	12	25	101	102	84	117	92	104
YDL120W	39	12	29	111	47	28	47	43	39	104	85	91	182	141	130
YDL121C	616	580	888	1380	1744	611	547	771	484	581	554	499	663	515	366
YDL122W	549	527	839	4444	1657	796	1350	1207	1236	3552	3689	2742	3638	2890	2664
YDL123W	33	14	37	125	53	27	54	25	21	190	210	156	243	200	207
YDL124W	698	170	450	908	884	524	369	592	496	703	727	635	1015	813	605
YDL125C	192	49	201	160	72	26	39	27	54	141	126	141	331	254	168
YDL126C	1579	754	1470	3131	1776	988	906	1055	1144	3746	3872	2817	3435	2947	2519
YDL127W	34	11	20	208	131	73	113	119	71	563	490	389	383	356	314
YDL128W	235	94	286	563	239	128	143	97	135	938	849	859	1193	1097	918
YDL129W	155	79	213	497	137	66	152	74	76	599	593	481	686	538	538
YDL130W-A	172	58	104	263	326	153	111	266	228	151	137	102	100	73	64
YDL130W	265	107	276	572	316	174	316	210	281	852	696	678	1235	1157	808
YDL131W	179	137	284	1552	728	371	1108	587	645	1775	1774	1326	1461	1271	1116
YDL132W	623	230	663	1167	798	388	379	455	454	1522	1509	1089	1049	912	784
YDL133C-A	0	0	0	0	0	0	0	0	0	0	0	0	0	0	0
YDL133W	529	199	564	498	263	124	264	229	253	1019	1004	726	871	733	638
YDL134C	603	243	685	1173	497	247	462	391	453	1012	941	883	1363	1171	964
YDL135C	280	71	244	112	42	27	54	49	26	354	276	270	214	200	156
YDL136W	1710	837	2820	1254	756	344	591	515	579	801	730	814	1503	1161	796
YDL137W	546	228	735	288	176	85	110	142	150	586	562	552	695	597	520
YDL138W	83	47	72	522	142	74	164	86	121	1065	1232	932	1525	1265	1227
YDL139C	75	32	80	505	336	116	182	214	172	332	342	215	326	233	216
YDL140C	511	351	438	2462	763	340	543	406	464	4975	4866	4104	5291	4652	4537
YDL141W	43	16	52	410	100	56	117	66	76	748	766	616	690	644	607
YDL142C	144	49	122	126	68	50	38	67	68	145	184	130	144	112	107
YDL143W	566	267	545	1709	560	345	568	349	400	1881	1979	1479	1701	1492	1499
YDL144C	81	69	83	261	143	68	124	105	103	492	593	319	358	314	281
YDL145C	382	167	330	1898	723	323	534	492	541	3444	3579	2953	3077	2930	2539
YDL146W	79	18	84	214	77	32	64	60	60	297	354	242	343	273	240
YDL147W	2531	1278	3265	3316	1688	1082	1062	1271	1426	1677	1791	1305	1666	1469	1219
YDL148C	1967	1422	2745	6546	2211	1234	1877	1211	1614	3535	3711	2622	3232	2638	2679
YDL149W	112	63	111	714	557	217	245	365	334	1028	972	635	736	642	598
YDL150W	362	281	433	1439	453	250	427	231	243	1495	1520	1065	1379	1119	1078
YDL151C	11	0	6	225	76	72	124	88	71	221	286	149	163	135	109
YDL152W	49	42	77	84	4	1	19	7	13	109	104	31	38	34	42
YDL153C	3003	2243	4883	2201	525	229	370	283	291	1529	1459	862	961	801	1078
YDL154W	98	50	117	375	129	71	135	150	118	568	692	380	323	354	319
YDL155W	124	67	117	1480	667	261	498	531	454	1165	1209	940	1072	920	793
YDL156W	39	23	12	194	109	46	99	72	59	830	940	645	472	426	419
YDL157C	212	98	262	156	66	27	42	29	37	150	140	171	187	159	112
YDL158C	65	37	108	134	44	31	41	61	48	52	32	35	56	44	37
YDL159C-B	0	0	0	0	0	0	0	0	0	0	0	0	0	0	0
YDL159W-A	0	0	0	0	0	0	0	0	0	0	1	0	0	0	2
YDL159W	38	29	49	458	179	103	132	109	129	503	542	387	553	453	405
YDL160C-A	21	11	26	12	6	3	5	3	3	22	13	14	41	38	22
YDL160C	263	117	254	1142	414	222	340	256	278	1203	1144	1075	1270	1141	1015
YDL161W	596	282	483	1126	894	360	480	600	634	1118	1273	694	874	683	660
YDL162C	2	5	1	10	3	0	4	6	2	21	43	10	11	7	9
YDL163W	0	2	1	1	0	0	0	0	0	1	2	4	3	0	3
YDL164C	120	44	59	203	100	44	55	82	73	982	941	750	457	492	381
YDL165W	201	65	216	268	123	56	87	71	85	267	247	241	363	326	238
YDL166C	424	239	695	446	152	60	114	98	81	317	311	239	483	407	372
YDL167C	405	399	793	1835	553	300	453	296	299	1992	2237	1663	1973	1687	1610
YDL168W	138	52	163	327	133	32	59	57	51	462	491	315	347	350	335
YDL169C	54	14	49	199	95	54	45	105	105	164	148	67	85	67	56
YDL170W	22	12	26	278	86	39	39	35	38	390	412	297	509	435	385
YDL171C	442	198	417	3356	1082	475	655	600	636	4805	5201	4218	6082	5630	5004
YDL172C	154	169	231	318	141	71	139	131	112	190	139	128	159	109	48
YDL173W	103	48	104	519	161	99	170	104	116	583	630	470	712	549	530
YDL174C	564	245	544	1609	429	217	480	403	472	1699	1569	1267	2289	1755	1757
YDL175C	102	54	190	511	190	77	151	129	112	485	521	390	598	436	430
YDL176W	334	223	510	786	237	129	243	215	206	922	929	709	891	758	734
YDL177C	130	59	237	473	256	128	164	208	184	187	186	137	200	183	140
YDL178W	468	301	692	855	322	168	342	260	275	920	958	786	856	715	582
YDL179W	42	24	67	212	149	47	58	86	85	330	218	235	191	155	156
YDL180W	153	85	169	317	101	43	101	83	99	601	675	551	651	536	512
YDL181W	451	166	410	198	323	147	132	214	242	176	143	125	98	87	65
YDL182W	73	67	92	1191	524	280	1534	228	595	1773	1749	1523	1392	1189	1045
YDL183C	40	16	26	265	52	25	90	48	54	288	281	227	295	222	239
YDL184C	0	0	0	0	0	0	0	0	0	0	0	0	0	0	0
YDL185C-A	48	25	26	382	103	71	100	65	70	299	308	234	232	193	183
YDL185W	955	475	1107	3014	1118	572	574	627	646	4113	4214	3658	4135	3797	3051
YDL186W	13	8	4	89	28	9	25	23	19	62	121	39	66	57	52
YDL187C	1	2	1	13	4	4	3	3	1	11	28	8	18	15	11
YDL188C	354	135	321	608	389	186	201	320	281	674	631	539	491	436	350
YDL189W	261	139	328	552	208	85	118	125	115	869	994	766	860	718	677
YDL190C	447	179	381	1217	523	270	375	450	399	1533	1604	1343	1471	1210	1147
YDL191W	1911	801	2522	1782	1109	540	770	700	743	1232	1074	1105	1882	1498	1012
YDL192W	863	370	1139	970	334	189	376	247	289	1209	1166	1203	1588	1272	962
YDL193W	120	48	99	499	226	126	209	199	155	501	546	419	628	510	467
YDL194W	68	33	45	405	119	57	101	75	82	698	669	425	509	431	427
YDL195W	323	172	219	1473	481	236	338	245	286	2906	3215	2479	2649	2381	2107
YDL196W	6	2	2	65	18	14	19	19	17	50	83	26	33	32	25
YDL197C	102	40	58	429	274	133	190	222	137	1003	1112	744	547	491	415
YDL198C	32	14	36	89	37	15	34	40	25	205	188	148	241	201	157
YDL199C	41	26	46	267	57	20	50	34	33	330	370	234	243	263	223
YDL200C	321	237	545	265	181	93	128	152	146	228	167	159	184	180	121
YDL201W	162	119	225	1034	293	115	257	141	217	754	747	610	803	691	619
YDL202W	48	40	87	376	157	88	156	130	111	442	497	386	452	352	354
YDL203C	74	59	104	441	89	62	123	74	77	891	902	719	827	703	644
YDL204W	330	84	121	601	863	437	230	775	503	723	609	485	413	403	273
YDL205C	287	146	388	701	184	96	171	132	155	877	870	697	795	677	617
YDL206W	186	120	282	436	113	75	120	127	135	581	646	498	507	425	349
YDL207W	130	96	149	1160	678	279	377	423	366	789	891	597	647	518	475
YDL208W	339	228	511	1544	495	253	425	246	314	798	860	813	1156	976	775
YDL209C	117	80	160	426	112	57	125	71	71	782	789	475	518	389	477
YDL210W	12	16	5	112	21	19	27	13	25	120	292	119	616	461	400
YDL211C	47	32	87	407	169	77	107	137	94	399	477	314	296	270	235
YDL212W	889	575	1731	623	238	146	204	154	177	830	833	768	1193	992	764
YDL213C	696	455	826	1898	517	284	470	262	420	913	939	663	904	661	653
YDL214C	15	19	38	337	59	34	45	50	47	382	433	223	328	330	305
YDL215C	312	117	387	757	169	86	169	121	166	1340	975	1046	1357	1198	1004
YDL216C	157	53	134	272	226	85	97	196	133	280	346	233	273	197	189
YDL217C	16	7	26	58	10	4	15	6	14	174	137	125	168	135	167
YDL218W	14	14	17	122	43	17	33	37	22	147	186	106	110	112	102
YDL219W	196	95	257	247	137	78	67	92	79	195	182	185	123	121	80
YDL220C	41	21	15	327	93	36	79	46	52	1017	943	712	588	552	493
YDL221W	21	17	30	49	31	4	17	21	20	157	111	99	68	63	66
YDL222C	36	6	17	42	23	12	13	21	15	168	119	75	100	59	76
YDL223C	154	57	82	718	604	383	352	652	428	3087	2007	1785	808	787	686
YDL224C	39	34	39	263	64	35	51	25	34	606	655	532	671	614	556
YDL225W	401	210	555	1126	300	156	264	261	272	1204	1184	943	1057	949	841
YDL226C	101	72	97	500	238	127	164	128	118	697	749	546	636	577	486
YDL227C	9	6	16	102	4	5	17	6	4	83	193	58	99	91	97
YDL228C	488	175	513	737	254	119	197	159	211	557	573	540	749	672	562
YDL229W	164	88	132	1215	340	182	423	175	259	2420	2093	2255	3005	2899	2434
YDL230W	85	40	77	186	135	51	64	96	81	206	257	152	207	144	132
YDL231C	150	84	232	885	158	93	162	88	94	1496	1402	1213	1698	1486	1347
YDL232W	4	3	10	12	1	2	3	1	2	4	9	7	19	7	7
YDL233W	53	25	48	367	134	57	81	67	77	493	451	368	605	450	460
YDL234C	277	135	374	671	282	142	210	188	225	1044	982	781	1463	1085	999
YDL235C	181	69	228	288	129	71	97	74	71	255	219	207	279	256	249
YDL236W	367	136	475	400	104	46	53	63	62	476	461	422	750	616	556
YDL237W	65	24	66	250	112	52	60	60	60	537	456	478	540	459	364
YDL238C	17	6	13	140	65	21	37	27	36	311	281	210	321	263	218
YDL239C	144	53	202	389	135	89	79	91	112	441	419	318	292	237	234
YDL240C-A	1	0	2	3	1	0	1	1	1	0	8	1	2	3	3
YDL240W	36	9	49	714	256	113	185	192	152	841	894	683	714	633	570
YDL241W	7	1	6	24	13	2	7	2	5	21	50	37	37	29	27
YDL242W	0	0	3	16	2	1	0	2	2	15	35	16	9	10	8
YDL243C	49	24	77	113	55	21	34	40	40	150	231	99	126	117	87
YDL244W	3	5	3	24	12	4	12	18	12	20	67	15	12	14	6
YDL245C	12	20	21	198	17	23	69	46	42	252	409	187	108	112	99
YDL246C	4	8	2	30	3	5	39	5	0	12	116	25	0	13	0
YDL247W-A	0	0	0	0	0	0	0	0	0	0	0	0	0	0	0
YDL247W	0	20	23	197	0	0	0	0	0	261	360	210	294	198	98
YDL248W	179	67	135	260	81	60	70	76	70	282	315	260	436	343	280
YDR001C	392	150	303	1004	433	228	312	315	266	1684	1602	1224	2161	1665	1549
YDR002W	2397	1885	3752	3282	1552	758	1066	832	1028	1299	1342	1185	2100	1605	1236
YDR003W-A	7	2	17	12	0	0	2	1	1	19	14	19	37	21	19
YDR003W	113	47	105	415	189	83	145	165	136	520	514	371	540	414	345
YDR004W	337	173	404	578	214	109	165	171	155	621	738	468	482	447	437
YDR005C	600	244	836	324	105	45	83	88	83	412	389	433	603	496	405
YDR006C	214	134	375	1505	304	180	303	141	185	2294	2259	1869	2721	2229	2024
YDR007W	118	56	140	640	251	165	176	128	151	476	497	351	413	363	315
YDR008C	160	101	219	254	136	60	50	76	65	99	103	68	140	115	71
YDR009W	20	7	15	166	33	17	37	21	28	324	256	198	460	350	343
YDR010C	4	3	1	27	7	4	6	3	3	23	26	15	22	18	18
YDR011W	562	351	480	3805	697	367	621	353	427	4671	4989	4066	6997	5627	5252
YDR012W	438	182	363	731	271	128	313	189	266	1288	1259	1258	1852	1717	1405
YDR013W	122	54	159	131	38	13	32	28	26	256	191	247	327	295	269
YDR014W-A	1	2	3	75	42	16	27	41	26	38	91	23	25	25	23
YDR014W	256	85	197	682	263	141	204	224	210	686	764	601	618	572	506
YDR015C	0	1	0	0	1	1	0	0	0	0	0	0	0	0	0
YDR016C	93	23	90	44	39	11	16	28	21	23	31	23	40	37	17
YDR017C	380	290	560	3027	691	341	655	508	509	2806	3005	2327	2959	2378	2232
YDR018C	53	19	44	149	27	22	25	43	29	162	155	110	154	96	99
YDR019C	41	39	111	558	378	142	177	354	218	631	809	689	692	640	495
YDR020C	198	94	296	492	166	108	157	144	123	381	401	338	410	328	291
YDR021W	309	191	659	1550	454	285	522	229	273	928	932	760	1086	924	831
YDR022C	76	30	69	488	621	248	309	625	408	227	238	153	238	212	212
YDR023W	1458	481	1430	2087	748	424	599	566	643	1802	1669	1641	1852	1627	1320
YDR024W	2	0	2	17	4	7	14	7	7	48	67	42	42	33	43
YDR025W	506	325	564	1715	1221	794	1532	877	768	1454	1630	1221	1598	1565	1236
YDR026C	298	207	386	1811	597	321	544	543	563	1516	1692	1186	1256	1079	1151
YDR027C	346	141	353	864	349	205	240	323	258	1270	1346	937	979	844	856
YDR028C	327	167	330	2829	1196	618	855	841	754	3685	3662	2803	3724	2919	2737
YDR029W	36	14	27	326	102	50	77	64	56	208	203	183	228	166	177
YDR030C	135	37	163	139	45	20	36	25	39	364	312	185	265	203	221
YDR031W	270	111	372	118	105	42	29	60	50	72	45	52	63	50	28
YDR032C	82	6	40	73	41	20	16	19	28	111	78	78	90	114	67
YDR033W	1033	274	1031	2068	951	596	852	759	788	2078	2189	2055	2023	2089	1685
YDR034C-A	156	129	285	172	60	31	49	51	60	75	109	105	159	140	95
YDR034C	222	142	332	1562	515	287	562	380	428	1529	1639	1418	1794	1475	1340
YDR034W-B	10	4	13	26	8	6	3	5	13	17	28	13	42	25	22
YDR035W	231	188	303	1256	474	274	327	167	260	1027	1020	839	1528	1127	1056
YDR036C	55	36	77	431	152	74	114	69	87	553	533	461	722	629	555
YDR037W	766	566	1315	2412	754	395	739	417	578	3229	2980	2860	3961	3170	2549
YDR038C	71	55	88	792	247	102	197	101	213	1630	1475	1241	2367	1999	1735
YDR039C	281	184	410	981	228	209	316	161	219	2140	2356	1916	1700	1151	1111
YDR040C	337	283	570	1354	428	164	244	241	216	1871	2337	1575	3609	3021	2675
YDR041W	288	109	418	403	158	78	105	123	147	374	398	324	524	390	336
YDR042C	105	70	187	352	89	49	91	85	81	151	192	161	177	148	132
YDR043C	513	207	392	1086	833	428	511	872	682	725	944	725	1170	919	809
YDR044W	71	36	79	1210	193	63	178	242	205	713	1329	1157	900	819	661
YDR045C	362	319	683	454	220	144	174	181	157	288	340	292	350	308	254
YDR046C	269	124	377	809	447	212	151	240	172	1018	868	780	1122	990	876
YDR047W	104	33	111	236	71	39	54	40	52	435	483	319	352	319	283
YDR048C	12	5	11	62	6	6	10	2	5	71	73	69	47	37	50
YDR049W	213	199	342	1274	467	262	366	350	294	1369	1452	952	1096	848	922
YDR050C	524	164	572	1295	445	262	332	336	443	1308	1115	1312	1282	1156	814
YDR051C	1236	787	1822	1009	327	193	355	284	330	819	884	539	681	578	515
YDR052C	330	231	382	2882	1401	756	957	1078	807	2091	2352	1689	1637	1301	1238
YDR053W	0	0	0	15	4	2	7	5	0	29	29	32	20	19	12
YDR054C	154	125	216	1691	703	344	475	439	481	1223	1186	1011	1597	1263	1072
YDR055W	69	30	50	202	81	56	85	91	97	659	616	537	1744	1304	1074
YDR056C	921	596	1476	2284	1032	511	742	853	1003	909	1035	750	1200	906	808
YDR057W	351	177	514	922	321	141	212	219	223	860	933	666	755	599	583
YDR058C	368	160	415	166	74	36	65	77	87	263	258	213	275	247	204
YDR059C	37	13	78	48	11	7	13	12	14	86	70	83	141	111	74
YDR060W	1108	1101	2034	7726	2073	1137	1841	1147	1210	4815	4970	3941	4539	3827	3659
YDR061W	143	72	268	809	319	155	290	334	271	1006	987	757	1105	906	776
YDR062W	326	154	328	1002	331	173	402	247	311	1845	1655	1704	1624	1548	1250
YDR063W	522	99	295	331	373	162	170	388	264	136	144	103	109	106	83
YDR064W	1668	467	1794	1374	739	374	628	582	745	1749	1324	1663	3368	2937	1758
YDR065W	113	35	113	327	115	58	119	99	97	517	559	411	452	401	393
YDR066C	71	28	77	56	24	10	18	19	23	99	102	101	133	119	96
YDR067C	278	114	359	524	408	235	269	456	345	300	293	310	346	266	251
YDR068W	835	472	990	703	374	186	240	309	330	541	575	377	340	281	262
YDR069C	120	49	145	432	212	89	117	116	132	578	594	529	686	534	440
YDR070C	155	40	103	331	574	273	188	1001	609	226	181	129	101	79	75
YDR071C	543	227	763	1005	558	330	367	479	452	496	594	512	549	471	396
YDR072C	216	154	305	997	194	94	205	115	160	1437	1299	1304	2198	1732	1487
YDR073W	161	93	163	595	367	185	176	177	190	347	354	304	482	364	300
YDR074W	823	247	396	1179	860	449	597	664	622	1840	2036	1386	2668	1859	1725
YDR075W	192	110	415	480	79	49	88	71	67	488	483	413	543	463	431
YDR076W	50	21	87	278	80	47	52	55	42	355	366	240	319	256	254
YDR077W	4413	3109	3318	4860	3118	2005	3072	2044	2018	11695	11045	7423	13155	9217	7129
YDR078C	229	130	388	425	144	51	102	80	86	190	210	178	257	209	180
YDR079C-A	126	88	210	128	72	35	45	39	50	82	79	68	85	85	51
YDR079W	343	164	339	332	111	50	82	74	60	174	131	146	180	151	132
YDR080W	392	183	474	656	254	119	152	173	174	806	896	653	594	534	542
YDR081C	179	119	267	1056	255	141	223	160	192	1126	1222	1034	1206	1038	956
YDR082W	157	68	242	326	90	36	99	65	79	453	494	357	476	429	377
YDR083W	867	634	1240	2876	794	478	846	397	603	1579	1682	1184	1349	1113	1140
YDR084C	101	29	98	258	180	104	97	162	129	190	205	155	234	196	159
YDR085C	77	35	59	401	219	92	113	271	167	469	453	356	378	386	312
YDR086C	338	231	629	523	186	134	221	208	188	388	385	353	464	396	287
YDR087C	1075	772	1778	2376	1105	605	739	596	537	1140	1281	922	1266	1146	983
YDR088C	579	334	794	1036	352	175	321	313	316	809	883	655	723	564	549
YDR089W	42	23	60	422	180	60	124	150	126	597	679	574	616	514	475
YDR090C	58	60	94	336	94	38	76	59	56	492	484	410	601	493	428
YDR091C	196	83	287	1612	349	203	374	214	239	1503	1483	1592	1952	1720	1501
YDR092W	119	61	113	442	297	187	213	220	208	187	242	190	387	301	252
YDR093W	191	129	151	2077	608	248	524	348	371	4556	4561	3350	4613	3759	3904
YDR094W	42	21	22	97	32	14	45	23	29	44	46	39	97	67	52
YDR095C	2	0	2	16	2	0	1	2	0	30	28	11	27	19	29
YDR096W	218	122	199	822	302	113	178	142	169	885	782	631	867	808	648
YDR097C	326	104	212	941	488	261	301	394	268	2247	2232	1597	1206	1186	1061
YDR098C	353	138	365	476	354	129	126	171	146	351	326	316	483	423	344
YDR099W	501	244	567	1276	989	601	562	636	567	1186	1172	896	941	885	679
YDR100W	77	15	49	47	31	16	18	28	26	101	114	106	97	93	67
YDR101C	359	300	610	1348	272	141	284	142	167	1646	1539	1532	2225	1965	1650
YDR102C	9	4	10	27	3	6	4	4	6	40	46	26	39	35	27
YDR103W	71	40	106	358	58	26	94	37	41	462	627	372	386	396	343
YDR104C	199	111	240	914	331	158	254	242	228	1466	1507	1052	1280	1071	1006
YDR105C	88	31	84	266	76	42	50	51	65	454	459	361	508	464	328
YDR106W	18	12	24	114	32	13	32	13	17	83	98	61	94	52	33
YDR107C	66	38	111	340	254	99	127	180	87	466	525	382	363	351	272
YDR108W	161	86	226	957	439	209	303	312	291	514	654	420	557	458	389
YDR109C	96	52	77	362	150	77	132	125	119	611	694	434	386	367	351
YDR110W	388	278	601	638	239	105	173	166	153	985	1005	781	929	811	740
YDR111C	113	33	88	290	57	32	67	39	49	626	566	558	628	513	503
YDR112W	18	13	15	135	35	24	26	33	18	152	157	144	105	100	98
YDR113C	75	37	52	611	653	274	361	537	286	792	906	619	602	562	549
YDR114C	26	20	35	141	121	19	35	81	47	27	43	25	24	36	22
YDR115W	229	95	380	292	174	74	101	133	107	230	212	191	305	253	202
YDR116C	128	72	166	1372	885	397	472	584	514	615	708	517	664	521	451
YDR117C	189	116	276	666	239	106	181	145	186	704	751	587	678	628	533
YDR118W-A	5	0	2	5	2	0	3	1	1	6	9	14	6	4	4
YDR118W	134	64	179	332	135	65	103	119	95	502	507	427	375	375	314
YDR119W-A	541	163	247	544	419	199	156	268	240	143	88	77	162	132	71
YDR119W	449	176	521	1066	480	234	297	308	299	1950	2117	1838	1669	1582	1398
YDR120C	190	189	270	993	173	103	227	93	116	1432	1436	1145	1270	1128	1124
YDR121W	178	151	215	1233	693	312	496	422	479	651	691	479	742	537	554
YDR122W	222	129	236	1205	565	238	362	323	325	2041	1987	1444	2258	1720	1593
YDR123C	40	68	83	1330	505	224	320	265	273	649	834	632	1413	997	867
YDR124W	30	19	55	381	25	11	43	11	39	178	268	192	259	218	203
YDR125C	95	33	128	272	64	30	41	47	49	259	257	203	276	216	192
YDR126W	105	59	130	497	148	87	119	82	73	356	441	368	517	431	406
YDR127W	212	95	204	1645	591	254	277	219	233	2628	2944	2543	2707	2706	2221
YDR128W	239	120	274	979	214	117	218	150	177	1615	1732	1185	1459	1223	1306
YDR129C	596	226	685	1189	581	269	253	255	285	1721	1727	1470	2338	1861	1657
YDR130C	83	45	97	385	263	93	121	168	114	454	462	351	512	409	386
YDR131C	79	17	105	179	72	35	40	66	54	254	284	218	259	249	183
YDR132C	68	33	120	475	106	46	94	75	63	395	397	337	504	389	358
YDR133C	231	91	303	605	360	163	91	134	144	133	109	97	341	299	229
YDR135C	354	160	326	1562	490	234	305	298	312	3645	3338	2953	3702	3071	2704
YDR136C	19	3	16	80	28	20	38	40	26	55	84	42	58	42	41
YDR137W	430	105	398	520	202	99	138	158	131	780	839	634	592	549	548
YDR138W	196	95	207	1362	619	348	423	508	407	1365	1477	1070	996	950	871
YDR139C	481	356	677	198	90	58	79	82	69	123	126	102	202	150	104
YDR140W	83	40	95	388	190	100	148	125	134	383	440	368	430	349	312
YDR141C	169	93	188	1354	530	277	317	360	310	2267	2409	2039	2011	1806	1620
YDR142C	66	52	112	276	58	31	59	59	41	382	347	296	425	355	288
YDR143C	95	100	133	1373	416	230	438	276	222	1459	1647	1194	1532	1304	1140
YDR144C	57	32	52	294	123	66	97	70	88	679	685	697	468	505	391
YDR145W	400	212	385	2140	966	560	719	601	607	1693	1902	1381	1585	1264	1191
YDR146C	15	19	23	203	261	38	95	163	110	205	513	182	569	464	447
YDR147W	105	102	241	469	134	64	89	107	90	601	613	544	785	634	565
YDR148C	142	53	133	434	231	112	150	151	136	703	503	458	443	465	317
YDR149C	11	0	5	564	257	177	136	140	120	535	460	255	409	271	324
YDR150W	275	185	345	3685	1358	626	781	741	802	5813	4704	3897	4142	3601	3392
YDR151C	115	69	151	976	386	189	300	284	255	482	525	447	533	510	405
YDR152W	1140	597	1674	2104	1342	579	849	655	761	1268	1384	951	1197	935	863
YDR153C	274	159	303	2196	820	476	710	560	494	1600	1704	1236	1512	1284	1248
YDR154C	64	19	63	124	128	42	38	36	45	87	58	83	149	87	66
YDR155C	326	64	213	468	379	204	208	226	234	471	419	402	536	508	333
YDR156W	40	26	79	187	70	47	88	20	20	218	229	195	397	342	235
YDR157W	4	2	14	13	3	1	3	1	0	50	17	27	20	19	16
YDR158W	146	69	164	1267	787	482	470	426	362	503	609	442	410	403	414
YDR159W	247	124	313	1878	692	321	485	428	434	2024	1957	1629	1700	1401	1281
YDR160W	179	130	220	733	234	105	206	194	202	1107	1159	878	1024	826	765
YDR161W	266	150	279	648	167	84	204	77	127	923	907	731	965	788	777
YDR162C	431	232	560	1027	946	453	486	652	551	514	651	361	416	348	345
YDR163W	716	576	955	529	322	144	185	277	271	310	317	180	219	178	169
YDR164C	80	30	61	399	134	69	123	71	71	638	658	519	549	485	474
YDR165W	434	207	591	1292	382	248	418	219	267	1119	1201	1038	1362	1189	1034
YDR166C	94	42	109	680	227	139	134	149	144	1098	999	933	1213	1073	850
YDR167W	756	584	939	696	326	116	194	145	186	410	518	357	464	430	311
YDR168W	1070	560	1382	1162	704	362	440	622	596	878	886	719	842	720	605
YDR169C-A	0	0	0	3	0	0	1	0	0	8	8	2	11	9	4
YDR169C	187	97	205	956	417	216	285	243	236	1024	1091	868	1122	932	876
YDR170C	784	348	820	3958	1970	825	930	1218	989	4274	4457	3700	4301	3664	3226
YDR171W	445	149	212	1282	890	315	296	693	599	902	917	676	880	795	697
YDR172W	855	563	1063	3531	1224	773	1205	713	759	3778	3861	3210	3781	3209	2935
YDR173C	145	70	159	282	148	64	113	110	132	357	336	234	226	173	179
YDR174W	217	106	249	915	357	200	371	218	222	1062	1007	1020	1339	1133	993
YDR175C	222	65	229	605	310	151	206	282	260	620	599	481	551	457	430
YDR176W	382	160	411	1219	613	262	391	517	405	1403	1422	1024	985	800	852
YDR177W	1237	771	1626	1139	606	292	286	373	348	580	624	511	593	504	416
YDR178W	66	17	45	65	27	13	27	27	28	96	71	57	63	70	63
YDR179C	132	122	266	266	201	75	84	142	76	211	220	179	196	193	123
YDR179W-A	137	43	233	173	64	25	50	53	33	235	215	259	346	320	234
YDR180W	215	83	257	1115	361	181	223	238	173	1509	1471	1303	1289	1198	1056
YDR181C	201	75	236	595	367	154	206	269	224	607	602	479	397	341	281
YDR182W-A	4	2	15	8	0	2	2	1	3	14	18	9	8	16	7
YDR182W	175	82	178	667	396	184	221	269	242	856	913	706	884	682	655
YDR183C-A	67	54	191	80	11	5	15	10	14	35	33	45	74	67	43
YDR183W	368	129	405	384	204	106	153	165	162	261	269	171	219	212	215
YDR184C	655	454	1256	2734	917	543	827	553	560	1124	1127	1015	1348	1058	879
YDR185C	148	59	168	270	108	47	82	76	81	264	247	216	398	334	266
YDR186C	252	256	356	2664	746	336	738	733	678	3146	3583	2890	3517	2686	2529
YDR187C	28	25	34	78	20	6	12	19	8	99	129	72	69	68	97
YDR188W	284	149	311	814	193	107	198	116	172	1723	1683	1408	1900	1725	1624
YDR189W	338	153	366	1062	411	227	310	279	284	1044	1190	1001	997	898	762
YDR190C	803	610	1407	2333	983	510	749	583	711	2407	2545	1832	2369	1987	1748
YDR191W	128	34	139	161	34	17	46	19	22	327	318	262	378	307	255
YDR192C	48	11	37	265	94	37	96	55	65	423	451	349	450	420	329
YDR193W	2	2	1	43	5	9	18	10	9	47	76	38	70	57	45
YDR194C	1401	728	2155	4081	1388	791	1114	776	967	2397	2322	2041	2550	2120	1909
YDR194W-A	0	0	0	0	1	0	0	0	0	0	5	1	0	1	0
YDR195W	99	73	150	708	141	94	156	120	95	567	644	510	565	492	494
YDR196C	783	233	791	302	170	79	81	112	131	290	245	243	216	185	156
YDR197W	121	63	156	326	100	69	78	74	72	313	285	248	272	231	215
YDR198C	182	89	261	516	134	89	163	85	96	600	621	524	534	488	410
YDR199W	101	74	145	208	102	51	76	112	83	66	69	55	61	38	48
YDR200C	175	119	254	618	267	151	172	230	188	608	663	487	507	412	385
YDR201W	262	206	369	389	353	115	197	264	242	192	228	147	195	146	119
YDR202C	192	45	183	223	121	50	71	76	64	221	232	167	215	179	146
YDR203W	10	2	10	40	14	13	17	13	20	32	52	41	49	32	30
YDR204W	88	25	52	406	339	126	118	207	175	434	391	309	315	281	195
YDR205W	66	31	70	416	94	61	113	85	67	579	637	489	603	569	460
YDR206W	146	84	175	676	197	112	186	126	145	1433	1405	1196	1310	1175	1120
YDR207C	143	113	188	1162	442	233	344	306	264	1147	1370	926	1226	1030	924
YDR208W	280	134	339	1458	568	330	478	396	390	1588	1728	1406	1899	1550	1408
YDR209C	123	42	139	151	85	23	25	32	45	123	121	111	314	228	146
YDR210W	32	5	19	11	9	5	5	2	11	17	5	17	25	12	20
YDR211W	616	340	894	1982	544	303	622	332	473	2223	2222	1832	2003	1803	1654
YDR212W	572	246	727	1945	897	423	507	439	391	1681	1790	1448	1872	1600	1353
YDR213W	88	74	96	1972	527	205	463	431	453	1739	2422	1816	2346	1804	1577
YDR214W	87	52	63	713	622	342	232	348	274	682	692	526	587	537	434
YDR215C	6	1	2	16	2	0	0	2	2	37	41	25	47	42	39
YDR216W	107	58	162	885	148	71	125	106	155	1536	1032	1032	2064	1590	1436
YDR217C	203	133	343	2049	551	238	432	423	347	2190	2447	1730	1908	1548	1539
YDR218C	18	12	11	69	21	6	17	39	18	102	124	48	60	75	44
YDR219C	109	58	126	566	198	101	147	153	139	677	632	515	676	555	497
YDR220C	1	2	1	5	1	2	2	4	4	4	26	6	7	4	8
YDR221W	111	44	62	727	406	188	228	285	216	1290	1396	1054	1010	894	802
YDR222W	63	25	94	361	249	122	126	196	130	750	626	625	603	525	467
YDR223W	46	38	96	552	142	44	145	181	148	438	409	318	535	362	338
YDR224C	176	65	235	154	216	65	100	171	139	298	283	268	530	446	348
YDR225W	741	281	912	1242	1246	601	717	1389	827	1210	1502	1107	1637	1403	1107
YDR226W	192	64	204	1235	815	374	465	620	521	784	791	737	736	640	540
YDR227W	186	115	265	1515	522	283	435	346	315	1988	2023	1617	1775	1487	1476
YDR228C	331	160	368	1369	543	313	435	334	311	999	1118	806	656	616	545
YDR229W	139	66	146	568	358	178	221	289	223	676	816	488	485	379	392
YDR230W	39	9	28	73	43	12	17	18	26	56	56	40	75	57	27
YDR231C	44	10	33	98	22	16	21	17	25	167	156	112	157	130	119
YDR232W	217	173	370	1766	415	210	427	244	268	1751	1618	1401	2215	1893	1659
YDR233C	352	233	364	1776	438	331	590	358	380	1754	1765	1624	2022	1792	1473
YDR234W	101	68	134	675	200	87	316	106	131	1540	1482	1164	1178	1098	1051
YDR235W	388	149	619	567	181	99	137	115	119	529	532	473	654	566	458
YDR236C	294	99	360	283	225	96	90	170	146	270	327	224	244	223	175
YDR237W	166	57	207	209	87	37	63	60	68	313	307	287	364	331	270
YDR238C	256	86	243	1692	574	269	433	366	397	2348	2225	2066	2371	2105	1756
YDR239C	84	70	105	927	262	116	202	117	149	1055	1185	833	1105	918	856
YDR240C	148	64	258	1381	489	263	431	301	288	653	756	586	834	650	610
YDR241W	31	28	56	112	29	27	48	47	44	42	76	57	67	58	44
YDR242W	60	19	52	200	37	19	35	32	33	458	421	411	678	555	515
YDR243C	155	79	230	661	278	131	165	171	137	760	811	565	689	543	551
YDR244W	145	86	165	1164	483	264	343	337	378	983	1019	690	874	732	712
YDR245W	498	265	629	1436	503	206	401	345	329	1479	1618	1273	1473	1243	1139
YDR246W-A	7	10	11	42	26	9	19	14	11	19	36	19	23	10	11
YDR246W	76	58	56	562	435	267	293	241	209	417	527	382	400	346	303
YDR247W	91	35	74	284	73	31	42	60	49	353	386	366	474	326	304
YDR248C	164	69	192	120	68	25	37	57	54	105	97	84	152	142	102
YDR249C	73	35	106	153	49	30	40	34	40	209	238	245	355	282	247
YDR250C	0	1	0	4	2	2	2	2	0	12	17	2	6	8	4
YDR251W	205	97	179	911	391	237	300	238	253	1126	1232	930	1138	955	857
YDR252W	14	6	16	104	47	25	33	33	24	107	104	80	88	76	64
YDR253C	31	11	33	100	121	42	30	75	37	44	96	31	49	46	38
YDR254W	108	38	105	93	43	25	23	44	37	247	243	179	198	177	155
YDR255C	113	43	116	496	299	142	156	281	244	429	368	278	377	255	229
YDR256C	64	45	117	185	31	13	30	28	40	595	380	368	331	341	266
YDR257C	267	106	390	786	220	103	148	92	107	811	822	741	768	642	613
YDR258C	255	86	149	1222	663	402	329	679	545	1061	1112	770	973	934	756
YDR259C	35	49	93	281	154	91	54	80	46	157	198	148	145	105	119
YDR260C	89	68	111	257	142	50	113	92	70	290	354	294	307	276	287
YDR261C	42	23	43	370	175	102	104	155	102	576	759	586	472	448	359
YDR262W	123	63	142	344	82	39	87	52	56	665	569	537	753	659	550
YDR263C	17	10	19	82	24	8	26	24	12	268	291	219	192	210	180
YDR264C	151	71	147	698	248	111	235	187	195	1539	1507	1282	1536	1363	1281
YDR265W	58	24	93	205	63	35	59	65	69	378	332	279	381	321	292
YDR266C	184	152	213	837	207	106	206	118	151	1177	1193	1002	1435	1244	1102
YDR267C	303	139	430	419	150	76	111	108	91	443	500	310	392	309	373
YDR268W	20	6	30	98	25	15	35	30	20	205	190	159	194	180	172
YDR269C	0	1	0	27	0	0	9	0	8	36	45	20	49	26	28
YDR270W	48	31	56	485	164	90	119	109	106	937	976	681	1206	952	971
YDR271C	18	7	23	42	20	11	18	12	14	21	23	19	35	32	33
YDR272W	653	297	791	492	219	134	153	201	229	681	608	468	580	479	452
YDR273W	69	42	59	249	88	44	54	88	48	269	301	143	146	153	161
YDR274C	36	69	187	303	51	9	81	46	44	190	262	109	266	167	266
YDR275W	453	401	894	944	396	258	229	288	226	811	858	693	877	665	702
YDR276C	271	89	331	88	45	27	36	56	65	168	137	179	339	259	151
YDR277C	182	87	175	616	274	161	288	238	285	497	503	333	683	586	507
YDR278C	310	178	267	5938	4191	4322	5506	5287	8903	484	307	231	402	225	213
YDR279W	72	26	92	124	25	17	21	26	20	275	220	221	279	229	193
YDR280W	658	384	1175	1236	661	367	407	418	340	781	806	669	846	647	644
YDR281C	708	449	1108	340	145	48	132	237	144	96	92	102	179	138	115
YDR282C	161	75	222	226	65	35	64	65	70	315	324	201	245	212	180
YDR283C	252	110	279	1571	308	173	306	226	250	2235	2231	1815	2081	1764	1690
YDR284C	342	66	251	224	129	62	74	88	81	299	296	268	309	289	225
YDR285W	297	257	621	1271	521	276	264	365	270	581	652	388	468	393	384
YDR286C	64	31	82	48	33	10	11	19	28	57	44	42	73	68	48
YDR287W	42	13	28	135	73	31	45	57	57	277	282	194	211	150	154
YDR288W	736	488	879	579	221	104	177	186	168	430	403	389	496	407	318
YDR289C	525	305	685	880	364	165	271	270	294	807	824	579	610	520	487
YDR290W	10	5	10	51	7	2	8	7	12	36	57	33	33	34	34
YDR291W	197	91	265	1579	437	245	336	334	313	1687	1754	1408	1735	1445	1334
YDR292C	311	115	366	827	253	106	179	164	151	1105	1173	1012	1152	951	829
YDR293C	368	187	321	1818	693	379	555	438	506	2769	2704	2369	3773	2944	2519
YDR294C	361	172	385	1178	683	303	363	438	420	1360	1432	1250	1801	1429	1259
YDR295C	105	40	87	868	251	131	200	160	122	787	831	670	737	658	622
YDR296W	85	33	97	285	139	39	68	83	87	410	427	356	516	443	370
YDR297W	165	96	262	1155	237	107	180	155	166	1050	1057	1001	1574	1234	1032
YDR298C	123	21	96	187	94	58	70	82	78	399	285	280	322	272	240
YDR299W	867	653	1481	2475	1027	514	899	519	655	1872	1935	1299	1575	1382	1445
YDR300C	233	92	283	677	212	82	201	130	164	871	874	772	1079	896	819
YDR301W	204	146	307	1379	390	210	340	272	276	2009	1980	1427	1663	1447	1346
YDR302W	287	149	506	195	80	38	44	74	56	228	234	224	274	252	206
YDR303C	293	248	561	1055	280	177	306	199	195	1148	1044	1086	1173	1090	952
YDR304C	698	205	725	773	549	243	232	361	298	814	736	706	784	692	528
YDR305C	144	63	170	132	81	25	47	60	48	226	206	142	152	139	104
YDR306C	261	67	293	371	132	72	85	97	120	464	443	359	528	449	334
YDR307W	272	76	199	271	160	75	92	103	91	555	558	538	396	383	317
YDR308C	272	168	412	548	413	205	210	267	242	216	294	265	310	241	176
YDR309C	37	20	16	119	90	49	70	60	47	401	448	358	583	559	460
YDR310C	185	149	189	1370	476	209	386	355	291	2147	2412	1651	1765	1518	1513
YDR311W	632	311	929	1278	649	304	422	582	486	939	966	766	890	781	713
YDR312W	513	479	1036	1699	588	323	503	401	480	1137	1114	878	1173	920	806
YDR313C	114	66	198	604	342	154	206	208	212	458	454	376	472	361	323
YDR314C	41	21	45	443	178	78	114	104	100	647	768	544	775	588	593
YDR315C	110	47	139	92	37	28	22	30	43	126	141	113	102	99	83
YDR316W	514	229	716	608	214	107	170	180	180	496	535	278	282	253	256
YDR317W	54	30	68	270	69	37	77	70	51	304	265	204	231	187	190
YDR318W	316	92	374	421	357	188	156	316	232	372	424	322	265	221	207
YDR319C	66	18	74	61	14	9	7	10	13	103	122	97	146	128	106
YDR320C-A	89	52	179	68	26	11	19	28	20	66	56	57	87	86	48
YDR320C	64	62	73	564	149	105	140	120	101	842	938	645	722	559	596
YDR320W-B	1	0	2	0	0	1	1	1	1	1	1	0	1	1	0
YDR321W	179	103	200	908	219	139	237	104	135	788	799	731	849	759	693
YDR322C-A	890	586	1354	302	229	91	80	98	96	152	119	117	200	180	98
YDR322W	40	25	64	319	78	33	58	52	54	323	284	282	445	334	278
YDR323C	189	43	198	620	391	174	201	294	200	480	537	392	417	360	317
YDR324C	807	549	1300	2622	938	483	758	576	620	2561	2515	2105	2664	2335	2224
YDR325W	143	117	251	1227	501	218	363	425	321	1587	1605	1284	1444	1349	1149
YDR326C	299	241	456	2123	631	266	437	421	384	2917	3051	2785	3909	3124	2715
YDR327W	147	73	184	111	68	22	32	28	25	94	81	88	151	139	95
YDR328C	1007	653	1540	752	488	233	268	267	311	640	635	595	1038	843	620
YDR329C	403	133	384	892	546	255	288	432	403	742	738	604	653	561	496
YDR330W	216	79	184	649	346	148	190	225	225	582	638	376	541	442	388
YDR331W	131	55	179	391	115	39	98	75	76	542	515	515	705	576	476
YDR332W	93	42	136	763	223	111	199	163	145	781	843	601	739	663	626
YDR333C	254	115	366	1191	358	180	353	252	244	1401	1385	1168	1450	1286	1106
YDR334W	531	318	644	4039	1241	563	844	752	891	3531	3745	2559	3438	2548	2631
YDR335W	369	230	525	1098	451	209	260	327	295	1569	1442	1229	1305	1144	1054
YDR336W	505	313	856	390	131	58	99	90	107	382	382	360	453	406	320
YDR337W	202	121	366	742	351	149	246	222	224	505	531	441	454	399	348
YDR338C	208	132	278	877	266	131	232	196	213	1130	1179	895	1221	999	923
YDR339C	424	184	524	1000	447	188	349	313	374	263	258	272	593	491	388
YDR340W	43	26	59	61	9	5	30	13	26	44	75	43	70	61	40
YDR341C	361	139	420	1359	343	174	324	224	239	1627	1588	1467	1684	1525	1355
YDR342C	1619	560	1643	2516	1735	754	653	1274	1098	491	478	220	1158	942	685
YDR343C	218	49	185	377	120	108	130	140	206	127	477	330	266	268	380
YDR344C	5	2	1	117	13	9	17	12	14	194	174	121	186	175	193
YDR345C	414	160	647	1173	233	114	212	194	280	2206	1619	1811	3079	2601	2220
YDR346C	1098	721	1540	2885	1013	403	710	667	605	1819	2062	1481	1993	1646	1583
YDR347W	49	26	99	291	84	42	72	53	54	400	395	306	560	452	378
YDR348C	225	159	246	1040	420	224	365	357	294	1331	1452	1087	1094	916	820
YDR349C	134	79	195	695	165	89	165	122	113	1186	1231	1030	1409	1188	1051
YDR350C	268	150	379	973	414	252	330	373	333	1005	1086	800	1051	823	760
YDR351W	279	202	417	1827	688	398	500	459	474	1999	1986	1630	1924	1554	1540
YDR352W	73	27	74	251	79	48	72	68	69	473	371	364	495	431	339
YDR353W	345	145	423	1213	548	308	399	298	291	1077	1177	871	1408	1140	1030
YDR354C-A	0	0	0	0	0	0	0	0	0	0	0	0	0	0	0
YDR354W	116	89	161	604	301	121	143	138	113	498	536	395	514	468	374
YDR355C	5	0	2	87	53	39	28	50	26	94	86	66	67	46	46
YDR356W	474	163	376	2155	1583	738	707	1388	785	1754	2035	1424	994	935	898
YDR357C	257	105	281	128	59	24	38	51	48	150	129	157	153	146	93
YDR358W	356	81	237	636	642	356	220	583	505	552	543	382	454	413	320
YDR359C	141	67	84	966	409	219	414	265	256	1921	2202	1397	1606	1348	1366
YDR360W	2	1	3	44	8	9	8	2	1	106	132	82	118	91	93
YDR361C	443	290	567	1918	702	350	490	374	374	848	911	783	1036	843	756
YDR362C	157	94	192	571	159	64	164	112	126	828	853	571	844	727	679
YDR363W-A	721	473	1101	788	793	384	389	503	552	323	377	262	326	305	249
YDR363W	100	51	97	1086	336	204	244	204	161	683	680	431	582	534	545
YDR364C	164	56	253	421	127	69	168	100	109	624	639	549	658	497	518
YDR365C	1053	830	1218	5209	1678	925	1592	956	1209	3219	3486	2527	2793	2241	2336
YDR366C	126	79	245	238	32	13	58	37	69	197	319	214	366	318	242
YDR367W	57	21	66	127	48	22	20	12	22	173	151	199	253	234	162
YDR368W	176	41	146	250	172	112	69	131	88	337	313	267	259	305	203
YDR369C	119	43	110	485	208	97	125	151	105	560	593	403	394	329	341
YDR370C	461	187	730	463	123	47	105	80	81	449	476	470	531	502	449
YDR371C-A	1	1	0	0	0	0	0	0	0	0	0	0	0	0	0
YDR371W	231	90	264	234	99	74	65	94	84	306	326	231	253	205	203
YDR372C	1379	706	1482	1271	651	295	473	483	514	870	897	787	976	785	700
YDR373W	531	248	756	154	88	22	45	46	56	250	198	196	306	239	214
YDR374C	20	18	28	27	5	2	11	16	6	19	69	13	44	48	28
YDR374W-A	222	140	288	106	77	38	42	75	61	53	52	53	107	79	59
YDR375C	75	33	76	366	157	92	125	99	112	478	507	390	448	396	291
YDR376W	110	28	101	213	95	48	83	82	78	391	390	303	281	282	214
YDR377W	322	211	642	440	227	216	206	288	243	366	362	324	419	363	256
YDR378C	397	244	685	276	186	85	134	151	149	288	257	259	365	292	220
YDR379C-A	96	62	160	96	40	34	41	87	71	91	61	64	78	61	38
YDR379W	252	188	383	1726	596	311	567	474	470	1659	1733	1247	1612	1236	1282
YDR380W	129	131	283	982	517	199	262	382	264	1038	810	874	1812	1392	1257
YDR381C-A	244	123	271	97	68	20	34	45	37	155	134	106	152	133	99
YDR381W	1019	500	1071	1868	826	370	523	486	451	1423	1288	1084	1902	1423	1166
YDR382W	535	268	510	1082	477	273	471	368	539	940	945	890	1582	1267	833
YDR383C	543	175	420	601	473	210	210	378	300	353	375	283	308	264	258
YDR384C	41	22	48	179	17	14	42	19	17	535	645	523	571	564	513
YDR385W	680	315	782	3205	1331	755	1086	912	1266	3736	3427	3495	4535	4590	3268
YDR386W	208	77	240	626	402	143	221	261	226	561	646	451	536	446	472
YDR387C	87	26	104	311	135	61	124	101	81	510	534	407	471	394	357
YDR388W	252	101	147	1108	734	402	325	396	338	1111	1100	808	916	779	706
YDR389W	199	89	189	1187	414	210	367	283	280	1411	1510	1150	1750	1444	1326
YDR390C	197	132	314	674	193	91	163	108	112	694	657	594	635	489	470
YDR391C	198	69	199	904	490	314	285	329	376	276	338	273	413	354	304
YDR392W	245	103	242	357	144	48	82	75	106	546	536	394	416	372	328
YDR393W	290	82	320	988	453	211	330	425	347	768	858	645	681	579	540
YDR394W	503	301	513	1671	903	502	557	581	617	1104	1259	910	1150	1006	843
YDR395W	391	267	477	1675	534	251	547	378	444	2433	2390	2255	2927	2520	2183
YDR396W	262	102	268	493	154	112	170	135	134	398	380	333	455	342	299
YDR397C	62	14	53	77	21	10	23	11	15	93	96	86	98	70	54
YDR398W	672	691	1131	2092	482	296	515	239	274	2328	2200	1633	2194	1902	1857
YDR399W	1010	671	1649	780	304	130	301	278	308	921	842	961	1125	969	777
YDR400W	105	37	148	102	34	16	43	37	27	327	326	319	382	322	306
YDR401W	5	0	3	17	0	0	5	5	1	0	29	0	8	20	18
YDR402C	4	8	4	86	12	14	25	13	11	139	173	99	98	104	98
YDR403W	40	25	41	85	10	8	20	13	16	137	171	99	159	178	137
YDR404C	110	37	111	219	133	56	97	71	91	230	241	208	397	299	232
YDR405W	94	75	121	615	285	143	214	144	131	737	719	495	707	555	537
YDR406W-A	3	5	3	1	0	1	0	0	0	1	3	0	0	0	3
YDR406W	186	74	151	1163	450	192	215	249	216	1160	1412	795	1338	1138	1127
YDR407C	214	86	207	716	343	198	254	244	238	1210	1338	974	940	921	776
YDR408C	190	144	220	693	393	177	390	311	370	614	717	578	604	560	457
YDR409W	80	43	134	382	94	51	113	73	63	801	853	617	596	557	522
YDR410C	137	65	205	91	16	5	22	10	16	154	155	147	246	218	168
YDR411C	53	11	23	139	52	24	61	35	36	231	297	243	418	338	239
YDR412W	254	192	383	1078	497	245	322	300	337	595	615	315	428	359	371
YDR413C	242	148	420	608	96	0	112	15	44	280	236	211	319	214	295
YDR414C	124	91	207	318	163	75	115	115	79	463	441	456	419	369	313
YDR415C	224	105	307	225	80	27	88	45	69	465	514	444	593	496	458
YDR416W	298	153	535	869	301	166	303	252	271	1240	1297	1034	1166	1078	987
YDR417C	91	30	108	428	118	86	252	99	158	777	785	725	1050	859	705
YDR418W	218	76	279	462	273	131	221	202	285	425	347	430	681	736	418
YDR419W	143	48	157	707	245	138	279	215	230	751	837	563	654	523	531
YDR420W	372	241	355	1989	461	220	416	256	295	2958	3159	2693	3591	2976	2745
YDR421W	115	41	98	635	359	190	250	281	232	1079	1155	719	712	690	653
YDR422C	120	68	132	1585	665	357	484	408	412	1879	1990	1588	2064	1687	1408
YDR423C	101	51	86	812	364	224	330	339	269	842	956	703	1033	738	760
YDR424C	449	254	474	248	158	76	89	144	141	139	137	112	147	133	88
YDR425W	73	23	67	337	144	87	97	71	81	398	388	303	336	320	259
YDR426C	37	11	56	34	14	2	3	1	3	11	18	13	34	23	13
YDR427W	975	436	1166	796	355	156	200	177	245	515	540	527	666	590	519
YDR428C	158	50	213	352	109	38	119	105	84	291	305	274	389	310	290
YDR429C	1625	844	1824	1969	692	369	610	412	501	1397	1375	1277	2050	1563	1343
YDR430C	113	46	137	648	207	84	180	111	121	1085	1133	899	1045	936	891
YDR431W	4	4	2	54	4	3	6	5	3	49	79	48	69	41	50
YDR432W	427	333	483	705	254	130	218	77	134	1773	1530	1340	2437	2004	1740
YDR433W	33	21	30	92	11	4	10	7	8	377	332	319	402	300	380
YDR434W	371	208	458	832	467	226	323	348	332	1058	1108	1055	1115	952	813
YDR435C	57	12	50	149	80	36	38	33	44	167	171	130	204	173	116
YDR436W	109	35	66	290	106	49	95	67	84	527	493	293	536	454	384
YDR437W	7	5	6	109	11	9	18	10	14	139	160	137	179	141	140
YDR438W	39	44	62	215	104	49	81	72	76	301	342	240	285	274	235
YDR439W	54	23	63	324	106	28	58	46	49	233	298	199	281	218	270
YDR440W	194	82	146	485	284	139	194	198	161	620	695	438	338	304	289
YDR441C	36	19	48	195	52	18	54	32	44	186	143	152	284	203	201
YDR442W	2	2	0	7	1	1	0	0	0	26	25	13	7	9	0
YDR443C	72	41	58	881	283	114	237	203	171	1257	1268	871	911	715	703
YDR444W	73	50	102	638	161	76	197	121	128	931	1042	698	656	579	578
YDR445C	46	33	77	165	66	36	85	82	134	63	91	47	88	68	49
YDR446W	6	8	4	41	13	2	14	9	8	55	93	33	48	49	71
YDR447C	722	276	1086	374	157	58	141	119	128	384	344	471	749	724	462
YDR448W	165	77	186	417	163	97	217	180	181	941	991	724	735	664	593
YDR449C	297	220	574	1122	325	201	446	182	242	1228	1280	1021	1393	1250	1140
YDR450W	1814	998	3017	2492	1867	993	1361	1357	1344	2038	2151	1800	2142	1945	1345
YDR451C	25	16	21	199	386	115	99	253	132	420	595	381	571	606	523
YDR452W	527	206	550	811	576	254	301	401	383	1695	1551	1303	1236	1081	987
YDR453C	13	7	12	31	8	5	17	15	8	45	89	73	61	70	49
YDR454C	262	95	208	764	281	156	234	170	197	588	593	623	773	676	494
YDR455C	1	0	1	6	1	0	3	0	0	24	26	9	32	26	23
YDR456W	101	31	88	290	74	37	83	70	70	516	573	447	491	445	382
YDR457W	366	157	431	3985	1083	594	745	690	709	6614	6699	5210	6456	5411	5295
YDR458C	338	152	404	1303	476	284	329	333	329	1059	1099	811	783	679	647
YDR459C	39	24	91	167	23	14	43	27	23	324	317	306	411	337	297
YDR460W	162	81	206	1073	553	256	369	459	406	513	607	339	397	288	322
YDR461C-A	125	34	68	110	96	28	46	67	74	62	62	43	70	58	48
YDR461W	0	0	0	1	0	1	1	1	0	0	5	2	0	1	1
YDR462W	48	19	41	345	262	122	156	196	171	200	211	162	295	223	189
YDR463W	336	258	415	1363	574	325	567	507	463	1818	1905	1426	1937	1638	1426
YDR464C-A	0	0	0	0	0	0	0	0	0	17	7	7	0	7	11
YDR464W	283	289	445	3470	911	368	641	662	523	3585	4027	2746	3227	2587	2561
YDR465C	731	523	1015	1530	422	251	500	197	299	1414	1573	1129	1441	1191	1209
YDR466W	140	62	139	1131	508	255	351	337	299	1573	1667	1188	1301	1094	1093
YDR467C	48	23	59	44	12	8	11	8	17	85	79	77	93	82	63
YDR468C	488	249	481	301	268	87	131	207	178	327	335	257	277	243	234
YDR469W	322	298	569	693	567	227	337	469	393	400	472	373	453	334	276
YDR470C	62	12	46	244	115	68	103	96	97	442	445	312	261	239	214
YDR471W	1575	709	2177	1404	1053	449	747	537	707	735	778	765	1454	1166	762
YDR472W	67	21	70	207	76	24	66	48	47	329	260	255	463	408	334
YDR473C	732	367	654	827	431	175	234	347	279	643	673	379	384	334	372
YDR475C	186	91	146	925	324	182	275	243	219	1366	1495	1082	1347	1182	1097
YDR476C	38	17	24	96	32	16	46	23	21	170	172	133	287	255	210
YDR477W	227	131	281	969	326	155	249	174	182	1416	1422	1136	1366	1110	1006
YDR478W	126	91	216	561	261	141	217	161	160	460	481	371	490	402	374
YDR479C	297	189	305	469	244	90	141	182	163	679	640	465	602	569	553
YDR480W	43	14	23	203	224	86	107	143	101	333	313	249	206	228	178
YDR481C	454	231	773	642	175	71	129	127	126	1426	1193	1184	2674	2011	1708
YDR482C	258	206	269	744	448	205	310	258	305	404	487	275	458	343	378
YDR483W	377	229	466	1038	296	189	324	197	268	1578	1458	1533	2256	1812	1518
YDR484W	179	70	236	689	314	161	222	204	174	598	630	512	573	477	424
YDR485C	252	184	331	1837	628	316	527	444	452	1664	1760	1061	1244	1014	1084
YDR486C	505	187	496	1147	797	419	466	453	535	560	565	472	561	465	408
YDR487C	93	31	106	556	253	119	135	98	116	453	439	411	577	491	411
YDR488C	12	3	2	138	56	21	49	49	31	335	421	234	198	196	197
YDR489W	27	21	54	265	67	39	47	47	39	302	278	228	362	327	294
YDR490C	94	75	107	878	352	193	281	238	227	953	1038	675	899	730	624
YDR491C	33	53	94	489	37	15	96	46	68	257	328	239	439	291	296
YDR492W	77	84	252	321	14	13	43	28	42	258	294	297	725	585	430
YDR493W	69	20	109	180	59	24	52	48	44	122	122	117	227	169	127
YDR494W	674	330	803	819	379	174	274	295	316	523	591	411	501	402	370
YDR495C	230	144	392	1540	569	302	456	468	433	1281	1289	1036	1178	938	938
YDR496C	1286	943	2425	3528	874	441	850	451	630	2512	2404	2426	3487	2904	2459
YDR497C	921	920	1575	2545	703	421	464	399	477	2318	2272	2053	6334	4367	3731
YDR498C	58	22	49	491	202	87	115	101	86	400	462	373	585	444	421
YDR499W	235	159	328	718	324	152	242	305	262	863	930	737	730	669	593
YDR500C	1956	862	1493	1989	2579	1062	1057	1486	1317	387	495	433	717	589	421
YDR501W	25	8	26	104	158	73	62	136	86	395	391	265	263	217	234
YDR502C	61	42	99	212	79	42	58	53	64	213	265	237	1507	1022	909
YDR503C	56	24	45	151	124	50	65	90	73	209	222	210	327	260	199
YDR504C	34	25	61	80	18	2	5	21	8	49	49	51	33	41	12
YDR505C	273	120	359	827	326	160	258	187	209	1487	1195	1049	1295	1054	910
YDR506C	30	16	30	256	104	49	45	58	62	414	412	284	380	283	263
YDR507C	115	39	24	852	1372	545	463	984	486	2268	2306	1631	1253	1327	1080
YDR508C	382	281	564	2091	528	255	430	310	328	2741	2257	1987	2586	2311	2115
YDR509W	16	20	27	349	28	31	85	17	19	395	408	257	253	221	226
YDR510C-A	1	0	1	4	8	1	2	1	1	1	2	2	1	3	1
YDR510W	73	37	73	344	152	91	178	146	116	352	369	295	424	341	269
YDR511W	83	46	122	125	80	34	55	50	47	110	110	113	171	138	101
YDR512C	426	195	380	324	316	196	133	279	237	180	221	118	127	113	98
YDR513W	424	105	395	288	282	157	108	208	176	133	114	127	161	149	107
YDR514C	237	193	443	431	92	35	84	62	81	569	577	384	506	354	415
YDR515W	462	244	679	666	241	112	122	150	162	440	484	385	400	342	266
YDR516C	97	16	55	196	91	43	41	68	69	141	260	146	257	273	182
YDR517W	59	36	35	384	160	85	169	120	101	537	597	404	394	411	356
YDR518W	156	86	144	923	763	300	317	560	309	694	828	655	659	539	440
YDR519W	202	94	193	208	129	58	68	79	59	182	165	164	217	188	137
YDR520C	129	36	148	566	141	77	172	127	117	797	791	606	646	595	604
YDR521W	10	9	9	222	174	76	80	105	80	84	95	70	98	67	67
YDR522C	57	20	90	103	15	4	19	14	13	87	148	83	113	98	110
YDR523C	86	58	170	423	29	10	81	18	39	402	356	316	527	451	430
YDR524C-A	0	0	0	3	0	0	2	0	0	3	1	2	1	3	0
YDR524C-B	228	114	512	489	165	95	190	129	170	832	742	658	1006	816	674
YDR524C	149	68	152	1100	326	184	316	196	203	1059	1028	888	1118	957	924
YDR524W-C	0	0	0	0	0	0	0	0	0	0	0	0	0	0	0
YDR525W-A	22	10	46	45	17	14	14	10	9	40	33	42	135	108	56
YDR525W	2	2	1	25	6	3	12	4	4	13	13	7	10	14	10
YDR526C	3	0	1	182	4	17	39	4	20	182	152	120	132	110	121
YDR527W	202	212	345	2435	996	536	739	573	614	1581	1589	1128	1656	1216	1237
YDR528W	138	77	99	428	373	242	316	254	204	904	913	710	770	730	630
YDR529C	780	326	1074	649	357	257	259	280	310	609	434	410	364	322	227
YDR530C	77	33	79	442	131	59	109	96	106	350	383	323	567	431	342
YDR531W	157	45	169	178	55	31	29	48	37	228	252	234	213	194	165
YDR532C	664	330	961	770	266	161	203	270	300	505	526	341	378	308	307
YDR533C	231	70	147	171	109	65	38	85	73	307	263	261	356	314	247
YDR534C	19	7	10	101	14	6	35	8	27	123	215	66	38	60	53
YDR535C	1	0	2	3	1	0	1	1	0	8	14	10	10	12	13
YDR536W	9	11	19	141	39	15	28	44	29	315	270	226	215	222	176
YDR537C	2	0	1	4	7	0	2	3	3	29	31	38	34	26	29
YDR538W	10	7	9	76	11	10	17	18	21	192	181	155	156	140	118
YDR539W	150	83	192	367	93	56	122	122	120	575	693	510	515	474	427
YDR540C	59	35	68	123	45	29	41	40	49	73	104	85	63	65	43
YDR541C	26	9	20	145	79	37	45	76	40	214	232	185	154	168	150
YDR542W	0	0	0	0	2	0	7	3	6	16	0	0	9	8	11
YDR543C	3	0	2	21	1	0	4	0	1	1	47	0	1	2	1
YDR544C	23	20	18	279	93	27	84	26	49	15	181	11	10	6	9
YDR545C-A	0	0	0	0	0	0	0	0	0	145	85	64	10	4	0
YDR545W	73	73	57	651	254	116	216	121	139	1477	1693	1199	1242	1052	1039
YEL001C	366	139	420	528	261	114	158	136	185	615	647	619	1173	992	725
YEL002C	289	121	324	710	243	148	176	161	212	988	895	971	1748	1496	1181
YEL003W	606	755	1159	1285	618	292	455	427	426	415	428	468	996	780	551
YEL004W	83	33	105	200	74	47	49	59	52	226	266	239	333	302	262
YEL005C	91	22	86	225	196	99	88	138	92	214	214	177	227	208	163
YEL006W	201	71	185	304	102	47	110	101	102	540	579	486	914	760	677
YEL007W	236	139	194	978	334	187	429	241	303	1685	1707	1302	1635	1214	1140
YEL008C-A	0	0	0	0	0	0	0	0	0	0	0	0	0	0	0
YEL008W	7	0	4	49	14	5	13	10	5	45	67	34	135	91	122
YEL009C-A	0	1	1	26	21	4	9	19	12	15	22	11	20	16	19
YEL009C	384	145	518	1081	364	174	272	236	340	1044	859	1006	2488	2186	1535
YEL010W	2	0	2	8	2	0	0	0	0	5	2	2	4	7	2
YEL011W	468	161	410	575	338	141	179	296	270	1029	713	650	1862	1481	1255
YEL012W	648	234	631	417	209	105	132	253	290	429	300	176	352	264	242
YEL013W	293	130	402	707	307	152	182	186	163	1046	983	878	1615	1457	1134
YEL014C	12	11	18	21	5	3	4	1	1	23	23	12	23	29	24
YEL015W	240	109	207	1624	861	461	558	620	520	1629	1834	1212	2262	1842	1800
YEL016C	95	55	101	296	129	56	133	154	124	740	754	620	940	852	779
YEL017C-A	39	4	41	26	10	5	4	5	7	36	21	27	71	68	56
YEL017W	24	12	15	123	67	29	38	36	29	198	182	143	360	331	271
YEL018C-A	35	27	35	178	127	48	67	77	77	69	99	40	94	67	69
YEL018W	108	64	175	756	309	129	197	209	213	534	574	386	783	578	630
YEL019C	18	20	25	408	159	105	123	128	97	442	541	377	732	605	553
YEL020C-B	21	8	28	44	21	11	14	8	6	34	35	38	107	106	63
YEL020C	158	177	277	233	76	44	100	80	83	606	740	527	2334	1777	1620
YEL020W-A	24	6	39	25	11	3	4	3	6	22	18	22	93	98	41
YEL021W	8	0	0	0	0	0	1	0	0	0	1	1	5	8	2
YEL022W	492	336	765	2563	762	406	651	569	553	2596	2780	2282	3808	3297	2953
YEL023C	129	70	185	294	115	62	86	97	87	439	575	333	503	444	421
YEL024W	121	22	97	96	67	32	33	32	48	228	137	158	246	232	186
YEL025C	104	43	131	549	186	86	85	119	83	785	736	659	1535	1337	1234
YEL026W	160	75	251	501	141	70	151	78	98	487	434	458	1516	1243	777
YEL027W	389	124	514	415	114	61	129	91	144	706	523	631	1488	1399	969
YEL028W	9	5	21	99	12	8	21	15	15	94	137	91	166	135	138
YEL029C	166	85	283	255	48	27	55	47	42	330	366	317	699	604	495
YEL030C-A	0	1	0	0	1	0	0	1	0	9	10	3	3	2	6
YEL030W	15	7	20	382	223	114	77	90	72	307	347	222	292	306	256
YEL031W	485	291	525	2258	836	451	566	465	456	3930	4005	3458	6800	5653	4649
YEL032C-A	0	0	0	21	34	1	4	7	4	0	0	0	0	0	0
YEL032W	186	115	166	1050	267	133	308	169	169	2465	2406	1826	4250	3419	3097
YEL033W	108	79	139	55	14	10	11	11	23	23	22	18	38	40	24
YEL034C-A	1127	728	1203	5508	2139	1263	1613	1358	1537	1651	1563	1576	2967	2321	1739
YEL034W	0	0	0	0	0	0	0	0	0	0	0	0	0	0	0
YEL035C	3	3	0	48	11	3	14	6	8	50	53	31	121	87	93
YEL036C	299	301	374	1405	463	209	393	306	293	1923	2045	1576	3446	2591	2261
YEL037C	278	171	334	938	297	137	292	165	217	1485	1448	1040	2089	1753	1721
YEL038W	41	7	20	163	50	36	33	27	28	133	176	105	275	253	182
YEL039C	864	331	838	154	87	40	49	106	125	74	92	50	151	147	108
YEL040W	388	142	455	698	252	151	184	108	115	1063	1092	1161	4464	3380	2711
YEL041W	84	23	46	194	118	52	53	120	81	214	203	121	266	236	205
YEL042W	117	85	181	533	115	59	130	102	101	1312	1336	1299	2624	2077	1767
YEL043W	157	110	133	1124	355	158	298	182	202	1753	1836	1512	2888	2321	1997
YEL044W	232	124	306	318	86	36	77	61	62	228	255	206	512	377	345
YEL045C	6	5	9	51	24	7	13	10	10	37	40	19	53	52	57
YEL046C	154	53	174	732	150	75	134	87	108	1220	1037	1127	2708	2322	1943
YEL047C	102	40	99	438	148	69	88	111	90	786	834	701	1088	1046	846
YEL048C	71	31	102	71	26	10	25	21	16	128	127	150	226	195	182
YEL049W	6	4	11	62	5	4	15	3	8	102	155	112	168	163	152
YEL050C	158	103	201	488	226	99	140	162	134	599	667	522	875	732	733
YEL050W-A	11	2	17	7	0	0	0	3	1	3	9	7	13	9	10
YEL051W	1158	757	1527	2922	1811	1000	1009	1323	1227	1084	1291	1051	1771	1504	1279
YEL052W	152	49	139	450	148	62	120	99	120	794	768	612	1098	988	843
YEL053C	97	31	87	385	108	56	109	60	72	610	689	623	1010	868	858
YEL053W-A	22	7	25	280	52	42	94	32	43	459	413	347	773	706	519
YEL054C	299	100	371	586	308	134	259	219	313	535	410	569	1590	1432	993
YEL055C	470	273	645	2804	832	413	800	579	721	2937	2849	2443	4035	3565	3276
YEL056W	107	34	71	273	152	83	109	113	108	487	503	390	577	569	482
YEL057C	27	15	35	73	19	6	19	17	17	72	71	55	72	83	63
YEL058W	207	63	233	358	171	84	127	134	119	976	852	763	1232	1106	988
YEL059C-A	18	13	33	70	60	23	39	53	47	91	73	65	127	105	80
YEL059W	2	0	2	39	19	6	16	27	18	68	41	37	60	51	67
YEL060C	417	389	395	1684	898	355	494	483	532	2973	2363	1902	6304	4407	3964
YEL061C	125	52	122	904	784	367	409	666	364	1692	1783	1435	1982	1735	1658
YEL062W	89	39	122	511	239	106	140	152	147	553	558	482	886	725	661
YEL063C	122	56	216	868	264	113	187	124	135	1221	1127	1064	3501	2773	2309
YEL064C	57	18	50	140	42	24	45	29	22	326	325	273	531	460	452
YEL065W	195	132	524	483	158	84	414	115	197	1024	1316	1156	3351	3122	2612
YEL066W	8	6	7	83	107	52	20	52	30	82	93	73	176	161	132
YEL067C	8	2	12	116	54	31	28	41	31	110	158	94	157	160	119
YEL068C	18	4	31	70	24	11	13	12	8	76	79	59	107	84	81
YEL069C	9	17	15	227	64	30	36	24	23	321	344	232	449	368	373
YEL070W	8	14	11	99	21	7	40	26	14	28	185	27	160	172	145
YEL071W	329	176	551	1001	314	133	256	174	224	1266	1157	1001	4461	3764	3157
YEL072W	100	48	123	78	15	14	15	19	15	133	159	119	260	236	167
YEL073C	16	2	20	20	7	3	4	6	0	53	43	52	234	173	161
YEL074W	21	19	22	148	32	27	45	23	22	86	180	70	112	73	87
YEL075C	3	0	0	15	0	0	7	0	0	0	30	30	85	75	31
YEL075W-A	0	0	0	29	0	0	0	0	0	152	213	231	303	232	218
YEL076C-A	3	0	0	0	10	0	0	0	3	0	0	6	2	0	0
YEL076C	0	7	0	204	53	31	63	28	38	334	495	319	444	355	330
YEL077C	131	71	132	480	187	92	149	141	125	1061	1292	654	1012	973	881
YEL077W-A	0	0	0	0	0	0	0	0	45	0	0	0	0	0	0
YER001W	798	452	1041	1570	796	468	443	499	410	2726	2513	2048	5053	3841	3400
YER002W	1489	1122	2101	1451	518	244	360	248	330	846	744	448	821	595	946
YER003C	66	28	48	481	216	120	157	190	141	844	796	788	1191	1142	885
YER004W	138	46	85	302	121	76	111	66	77	427	360	326	756	595	538
YER005W	126	71	204	600	134	60	132	106	101	1016	990	783	1772	1447	1381
YER006C-A	8	8	28	23	0	1	9	6	4	18	33	12	27	20	31
YER006W	675	486	1035	4670	1273	851	1477	682	862	3021	3307	2232	5186	4225	3775
YER007C-A	158	44	158	262	89	35	65	39	48	217	225	230	514	449	330
YER007W	106	39	162	153	23	14	37	23	30	227	273	209	423	365	366
YER008C	288	208	371	2352	985	499	684	703	592	2467	2557	1894	3752	2988	2864
YER009W	190	60	263	151	42	27	43	10	30	224	160	227	637	594	369
YER010C	99	32	99	155	62	31	51	39	43	195	201	175	498	406	307
YER011W	112	32	33	124	33	10	59	58	66	197	387	385	434	601	371
YER012W	1093	378	1370	471	233	109	129	162	171	393	389	367	866	704	609
YER013W	188	106	250	1765	573	283	450	405	317	1912	2067	1465	2828	2418	2388
YER014C-A	6	6	21	0	0	0	0	0	0	12	19	27	34	50	11
YER014W	222	50	212	386	183	62	66	137	108	671	717	521	688	608	539
YER015W	31	14	28	153	52	29	50	55	45	398	348	262	333	353	281
YER016W	118	41	78	236	151	56	71	89	95	480	567	305	411	378	391
YER017C	89	53	112	555	118	69	145	84	97	1357	1210	968	2286	1928	1781
YER018C	31	11	31	154	92	24	43	47	39	178	198	158	434	343	276
YER019C-A	765	306	593	390	148	91	190	169	183	155	130	156	482	448	340
YER019W	73	33	76	501	149	69	116	80	95	748	720	574	1250	1148	1034
YER020W	275	157	238	1061	519	232	373	388	442	1065	1134	874	3159	2095	1894
YER021W	583	251	779	777	293	115	170	135	189	883	832	810	1480	1425	1134
YER022W	666	238	830	1426	560	303	344	425	411	998	962	821	1403	1223	1078
YER023C-A	0	0	0	0	0	0	0	0	0	9	23	0	0	7	7
YER023W	122	48	124	432	215	97	120	132	112	591	643	482	986	850	719
YER024W	170	59	238	988	343	174	241	289	355	1693	1069	1135	2549	2248	1903
YER025W	372	275	520	1995	646	442	664	391	556	2027	2035	1690	3228	2815	2554
YER026C	700	355	1047	694	323	169	147	156	171	556	529	500	2698	2004	1506
YER027C	90	40	65	428	270	129	179	182	149	611	714	493	1054	937	786
YER028C	18	12	45	333	94	40	120	83	71	393	464	319	556	587	516
YER029C	270	157	431	783	396	186	232	266	265	429	473	310	627	476	456
YER030W	1267	988	1924	1423	1423	687	537	925	820	619	522	397	608	486	383
YER031C	123	56	129	364	147	71	99	88	117	400	440	319	668	569	491
YER032W	43	35	37	358	132	61	112	116	86	731	882	575	867	836	801
YER033C	87	75	95	561	194	101	157	112	137	1396	1422	988	2001	1540	1482
YER034W	37	23	39	469	185	106	142	127	79	296	310	228	515	401	367
YER035W	117	52	83	464	245	102	137	155	133	425	387	312	1003	664	552
YER036C	564	298	685	3632	1006	574	892	506	533	3065	2815	2744	5830	4805	4020
YER037W	1103	500	1553	1105	381	284	299	364	394	959	770	714	1882	1377	1250
YER038C	335	155	445	538	208	129	132	111	122	329	370	327	777	566	552
YER038W-A	0	0	8	99	70	24	28	28	19	0	7	0	17	6	0
YER039C-A	4	1	4	11	2	7	2	5	6	24	35	18	36	39	35
YER039C	13	7	11	94	7	8	12	10	16	110	114	72	222	184	171
YER040W	93	72	138	755	397	209	252	184	182	937	1036	701	1503	1216	1087
YER041W	69	46	65	537	179	90	144	95	121	653	763	520	913	790	768
YER042W	125	73	254	51	40	14	20	17	18	111	95	84	218	175	157
YER043C	267	141	360	1301	275	155	333	177	264	1674	1490	1562	4994	4033	3413
YER044C-A	10	7	12	137	23	9	20	19	22	144	184	156	234	199	195
YER044C	93	29	124	41	6	2	6	8	13	37	44	53	160	128	77
YER045C	94	89	154	890	175	75	150	92	82	683	675	583	1113	866	799
YER046W-A	22	24	42	37	8	0	7	4	14	41	38	38	64	60	44
YER046W	118	49	176	83	20	7	14	18	15	88	62	66	157	112	101
YER047C	184	135	196	1429	550	261	361	410	349	1507	1643	1088	1941	1568	1774
YER048C	601	322	788	1805	833	506	620	768	752	1046	1102	791	1391	1138	1107
YER048W-A	212	112	369	319	126	84	131	111	131	266	248	242	589	448	330
YER049W	1018	576	1606	2037	464	268	503	298	411	2198	2223	1858	3409	2937	2674
YER050C	422	302	758	428	187	92	126	109	128	296	287	291	786	575	482
YER051W	217	93	323	486	255	134	155	202	198	490	566	382	729	623	588
YER052C	62	40	119	306	93	47	71	43	65	475	458	443	1072	971	785
YER053C-A	39	3	47	2	2	0	1	6	2	3	5	4	10	9	9
YER053C	317	76	285	331	117	72	54	85	62	342	391	341	658	465	435
YER054C	127	44	92	599	386	180	163	356	286	522	575	370	681	569	518
YER055C	662	442	1091	1242	959	515	689	600	602	1482	1686	1397	2509	1993	1724
YER056C-A	670	360	839	1311	870	440	701	582	701	14	17	20	2521	1981	1506
YER056C	209	148	370	980	198	105	185	165	218	1922	1737	1747	3648	3054	2622
YER057C	175	83	234	371	278	157	248	251	246	436	481	436	728	628	507
YER058W	93	10	55	74	100	25	31	67	59	50	73	31	71	53	50
YER059W	148	40	115	458	344	156	184	378	289	539	606	447	652	567	468
YER060W-A	21	16	16	321	120	50	67	62	54	755	843	569	956	717	802
YER060W	24	33	18	278	91	44	66	39	55	613	668	517	726	696	637
YER061C	42	30	29	259	128	56	95	98	90	571	667	459	1060	755	721
YER062C	151	70	141	671	258	199	252	170	171	1051	776	729	2555	1819	1451
YER063W	64	40	81	274	131	68	72	56	55	307	304	258	558	501	405
YER064C	129	97	148	1153	359	226	471	242	242	1489	1579	1243	2330	1918	1742
YER065C	57	20	64	280	75	30	144	109	173	1344	661	894	912	864	620
YER066C-A	579	171	885	560	409	161	117	313	251	236	177	160	153	149	123
YER066W	50	14	35	55	12	6	8	9	17	62	92	45	87	79	75
YER067C-A	513	105	626	258	202	70	38	101	81	17	6	22	42	53	33
YER067W	410	143	776	529	171	100	78	239	193	489	275	338	312	318	186
YER068C-A	2	0	0	136	47	29	16	14	14	75	130	62	125	94	84
YER068W	124	83	152	1389	419	236	490	333	304	1496	1623	1215	2603	2068	1887
YER069W	30	40	70	513	136	75	108	92	73	994	966	752	1446	1206	1062
YER070W	135	35	36	405	235	110	122	188	207	2463	2156	2123	2849	3038	2228
YER071C	133	76	226	110	31	8	22	19	24	107	105	117	287	247	198
YER072W	904	337	897	671	279	145	292	234	299	685	755	659	1854	1357	1073
YER073W	211	138	282	827	225	138	399	169	214	1936	1746	1617	3190	2395	2063
YER074W-A	162	89	279	91	22	11	24	29	29	104	74	81	242	195	142
YER074W	661	311	780	1465	837	483	675	645	705	1273	1160	1153	2774	2240	1630
YER075C	147	154	316	1918	351	207	456	246	265	1588	1629	1265	2378	1938	1811
YER076C	28	7	28	54	16	9	10	10	12	99	113	91	176	162	145
YER076W-A	15	7	16	42	12	3	8	6	11	32	36	38	58	58	47
YER077C	275	158	502	1098	339	137	260	253	256	1034	1031	689	1314	1027	1098
YER078C	112	69	154	495	109	62	86	60	76	517	504	429	878	789	683
YER078W-A	0	0	1	15	9	1	3	6	6	4	17	3	3	5	2
YER079C-A	2	4	0	73	14	14	9	13	14	136	118	78	143	114	127
YER079W	169	96	196	395	152	96	147	124	139	304	306	203	477	333	311
YER080W	330	167	311	1484	707	429	577	569	514	1432	1428	1045	1699	1485	1272
YER081W	232	115	314	898	97	46	191	98	128	919	823	822	1962	1607	1378
YER082C	327	228	589	2073	475	275	564	277	337	2013	2116	1682	3428	2850	2739
YER083C	109	43	90	281	84	42	56	47	36	480	445	416	1033	873	712
YER084W-A	7	2	7	22	3	2	12	9	6	31	44	6	26	9	29
YER084W	20	18	13	67	15	9	25	11	12	122	119	79	148	118	90
YER085C	0	0	0	0	0	0	0	0	0	10	8	5	0	11	5
YER086W	72	39	77	693	171	79	163	93	96	712	746	547	1272	1175	1090
YER087C-A	46	32	68	116	59	25	39	63	57	96	86	53	93	99	68
YER087C-B	47	24	72	162	56	41	53	45	55	129	120	141	259	240	188
YER087W	25	8	24	162	27	16	34	40	30	264	289	178	267	264	239
YER088C-A	148	163	163	314	353	122	88	81	59	176	204	152	231	205	236
YER088C	311	218	347	1073	404	180	345	224	256	2239	2047	1715	3526	2974	2660
YER088W-B	9	5	9	51	31	16	15	16	7	48	67	34	57	61	56
YER089C	81	58	81	575	214	123	155	112	94	1144	1271	976	2051	1903	1632
YER090C-A	0	0	0	0	0	0	0	0	0	0	0	0	0	0	0
YER090W	79	24	57	359	107	43	80	44	54	619	583	486	974	865	822
YER091C-A	0	0	0	5	0	0	2	2	1	5	12	7	5	2	5
YER091C	30	13	126	341	192	65	95	143	168	690	634	692	2205	1847	1479
YER092W	315	133	249	465	325	175	242	270	254	247	311	226	551	369	292
YER093C-A	15	14	24	134	65	39	48	42	45	103	127	102	259	190	169
YER093C	150	82	187	1034	248	135	222	207	217	1640	1748	1443	2623	2181	1943
YER094C	524	197	579	666	443	224	264	291	340	641	744	518	977	813	694
YER095W	89	33	51	513	330	151	183	221	163	716	653	431	1160	997	908
YER096W	97	23	130	84	48	27	24	24	24	285	284	158	298	281	267
YER097W	11	7	6	54	12	8	15	20	11	81	79	58	127	91	92
YER098W	151	81	186	410	140	58	107	100	112	735	665	546	1008	882	851
YER099C	243	115	274	219	54	25	54	34	43	437	422	378	906	835	699
YER100W	431	303	579	920	400	196	394	332	349	591	632	532	1026	878	729
YER101C	72	22	48	148	69	24	75	45	51	354	373	218	342	335	303
YER102W	2655	1018	2421	1933	668	511	988	610	954	2055	2320	1778	3883	3209	2459
YER103W	160	67	99	937	325	143	240	484	248	1611	1361	1040	2017	1886	1632
YER104W	31	4	22	313	372	133	131	266	175	241	255	201	334	306	275
YER105C	253	121	302	1656	386	242	353	306	285	2949	2877	2518	4752	4042	3597
YER106W	25	9	34	53	34	9	25	42	25	78	73	73	129	127	101
YER107C	163	57	243	314	102	65	89	68	77	422	417	371	736	649	533
YER107W-A	62	35	59	88	33	15	24	22	17	86	95	63	144	128	100
YER110C	735	562	1074	4306	977	569	1153	540	662	4315	4394	4066	6975	6435	5273
YER111C	456	143	166	1114	1911	902	651	1230	749	1868	1961	1558	1331	1436	1056
YER112W	945	475	1393	867	431	203	283	278	300	586	531	474	828	707	598
YER113C	149	58	147	352	95	33	84	77	73	1175	1089	1033	1486	1329	1226
YER114C	278	163	295	1632	599	277	510	418	405	2659	2733	2080	4209	3548	3340
YER115C	69	16	90	90	32	12	42	28	31	201	223	178	266	273	241
YER116C	67	21	44	435	221	82	194	161	171	512	545	390	787	625	644
YER117W	2132	965	2948	913	459	257	497	370	539	1166	1099	1176	2602	2288	1591
YER118C	313	199	325	1022	624	329	426	405	406	1153	1188	962	1645	1392	1247
YER119C-A	12	7	11	115	23	17	36	17	22	159	166	137	224	180	168
YER119C	38	20	32	154	59	31	52	30	30	443	430	335	528	537	465
YER120W	142	71	159	666	295	223	297	175	162	813	841	676	1348	1178	924
YER121W	70	30	75	241	206	107	60	156	185	132	95	78	112	120	93
YER122C	923	508	1166	2506	1423	763	973	1001	879	1893	2095	1486	2572	2127	1992
YER123W	505	187	661	1382	550	264	439	375	418	1143	1238	1003	1758	1500	1323
YER124C	15	12	34	1447	757	434	205	186	255	3070	1695	2259	2557	2688	2224
YER125W	565	273	546	2387	1272	648	756	716	735	2839	2962	2301	3678	3201	2744
YER126C	2535	2144	4950	2309	808	419	785	542	691	1242	1306	1110	2618	1991	1752
YER127W	802	599	1317	2279	897	518	848	495	647	2101	2221	1455	3130	2494	2412
YER128W	41	20	41	194	125	57	67	60	46	187	188	124	278	200	172
YER129W	384	283	520	2442	892	436	683	618	580	2554	2876	2170	3677	3008	2925
YER130C	352	130	372	1394	313	207	331	235	217	1226	1183	1190	2539	2034	1768
YER131W	2758	1088	2510	3372	1762	1034	1709	1279	1551	1696	1799	1617	3659	3064	2271
YER132C	201	152	250	2883	630	359	669	500	482	3915	4007	3249	7330	6133	5803
YER133W-A	74	34	64	142	76	38	50	45	48	76	66	60	149	114	90
YER133W	2611	1459	3688	1505	717	450	508	540	567	1360	1353	1194	1910	1658	1445
YER134C	70	18	60	305	179	94	97	104	98	195	261	161	298	255	230
YER135C	10	4	5	20	6	5	4	1	4	24	38	16	64	42	29
YER136W	727	292	911	1575	503	332	519	468	552	1466	1460	1232	2297	1859	1519
YER137C	301	179	349	486	199	112	257	125	205	304	287	212	453	390	356
YER137W-A	13	10	24	107	13	12	55	16	26	58	64	36	71	67	63
YER138W-A	0	0	0	0	0	0	0	0	0	0	0	0	0	0	0
YER139C	140	33	134	170	80	41	63	55	83	224	236	211	301	294	256
YER140W	211	107	257	870	255	151	211	198	202	754	818	687	1580	1183	1122
YER141W	138	66	144	513	236	112	154	195	164	805	636	515	1314	1107	976
YER142C	558	257	727	319	104	49	75	81	117	226	263	158	305	246	227
YER143W	110	41	111	386	147	72	69	88	80	441	451	299	663	571	484
YER144C	74	38	87	341	93	40	76	48	70	839	826	580	1333	1036	1103
YER145C-A	171	45	122	390	132	80	145	116	100	251	262	210	471	353	307
YER145C	341	338	463	1275	458	254	860	499	562	2523	2821	2164	4430	4050	3658
YER146W	211	101	187	252	203	61	103	81	86	134	128	162	395	297	213
YER147C-A	134	78	166	407	211	107	191	195	157	279	327	232	498	388	350
YER147C	129	78	146	340	99	53	103	66	76	819	801	575	1269	1141	1044
YER148W-A	22	16	54	121	48	0	16	29	13	81	82	52	161	97	89
YER148W	326	165	518	386	95	52	111	55	88	670	583	590	1122	928	843
YER149C	37	13	25	417	111	76	78	67	59	351	421	330	550	536	473
YER150W	407	148	452	965	420	219	231	216	204	359	446	350	1287	1008	788
YER151C	324	236	451	2011	640	277	450	330	318	2395	2513	1743	3070	2468	2427
YER152C	42	21	48	210	87	31	55	35	43	736	447	492	605	689	437
YER152W-A	6	2	2	37	9	7	8	6	8	222	108	156	165	173	191
YER153C	15	6	9	195	69	38	61	34	54	475	417	319	561	485	455
YER154W	109	129	138	707	306	137	203	160	167	939	935	715	1291	1146	1036
YER155C	415	235	469	3088	892	441	685	609	633	4547	4301	3779	7239	6008	5704
YER156C	165	100	187	955	226	118	266	133	146	1093	1129	892	2135	1784	1575
YER157W	230	76	267	769	308	177	210	284	230	740	837	751	1257	1135	903
YER158C	181	131	211	1057	376	239	503	411	294	1170	1374	951	2488	1783	1822
YER158W-A	392	412	672	258	148	89	135	157	167	162	171	106	222	159	170
YER159C	937	662	1253	795	614	348	474	660	590	660	692	414	848	635	640
YER161C	281	245	364	1475	660	294	516	454	412	885	1012	612	1308	942	1057
YER162C	225	157	337	1043	317	125	223	228	208	1143	1119	642	1331	1048	1101
YER163C	103	39	81	201	81	24	58	53	67	280	267	219	596	491	385
YER164W	234	238	283	3241	1045	415	656	626	485	3647	3887	2941	4594	3804	3784
YER165C-A	0	3	3	96	34	23	38	36	28	124	140	110	216	164	125
YER165W	347	262	457	2560	981	526	942	600	653	4253	4299	3527	6657	5744	4724
YER166W	260	151	254	2292	861	430	686	583	622	4039	4105	3093	4906	4183	3794
YER167W	220	115	250	1736	602	334	739	509	556	2432	2432	1920	2938	2479	2296
YER168C	266	175	479	849	201	141	212	136	180	991	959	860	1671	1445	1303
YER169W	189	120	243	1230	267	168	262	148	161	1428	1377	1062	2161	1647	1560
YER170W	108	42	61	121	96	45	64	98	73	196	222	135	199	151	169
YER171W	370	254	590	1664	601	260	390	379	311	1484	1607	1118	2462	2109	1982
YER172C-A	1	1	1	19	0	4	3	0	4	37	46	35	73	51	48
YER172C	383	211	467	2962	675	378	629	436	451	4286	4466	3458	7006	5788	5780
YER173W	118	50	147	542	207	98	200	136	145	607	682	487	763	700	585
YER174C	241	110	332	288	110	47	74	76	85	309	356	286	503	439	348
YER175C	89	55	99	579	265	142	165	274	194	475	525	393	654	535	521
YER175W-A	1	0	4	4	0	0	0	1	1	6	5	4	7	4	8
YER176W	147	125	160	1319	398	214	355	258	260	2322	2423	1517	2641	2238	2417
YER177W	492	205	486	1411	864	508	710	642	658	1664	1757	1321	1562	1317	1060
YER178W	111	43	127	457	222	108	101	96	108	661	567	551	1010	968	724
YER179W	23	12	14	60	5	3	17	11	14	54	121	43	91	75	71
YER180C-A	13	11	18	131	54	13	37	28	27	65	66	67	163	119	88
YER180C	93	66	175	185	40	24	58	25	27	293	241	195	367	348	337
YER181C	1	2	4	9	5	1	1	2	1	6	17	5	20	19	10
YER182W	141	36	105	161	77	37	52	40	51	125	128	109	308	244	191
YER183C	63	20	78	307	156	70	106	120	88	331	289	254	570	482	402
YER184C	38	26	37	238	41	35	64	41	41	646	652	493	1382	1099	983
YER185W	11	4	13	57	7	12	20	17	15	129	92	60	115	109	102
YER186C	272	91	396	252	58	42	57	44	47	397	381	342	564	452	432
YER187W	119	54	158	169	21	18	14	23	23	70	90	65	346	266	241
YER188C-A	8	7	12	43	3	3	15	0	1	8	100	4	8	9	7
YER188W	119	11	113	111	21	7	22	16	19	76	161	96	201	229	149
YER189W	0	3	0	5	0	0	0	0	0	13	0	0	0	0	0
YER190C-A	0	0	0	0	0	0	0	0	0	0	0	0	0	0	0
YER190C-B	0	0	0	0	0	0	0	5	0	0	0	0	0	0	0
YER190W	14	0	0	479	150	0	279	83	46	614	792	456	1028	724	820
YFL001W	263	197	408	1110	298	206	284	169	203	847	898	748	1042	892	731
YFL002C	442	360	623	1969	528	323	461	391	411	1238	1289	844	1167	963	1007
YFL003C	48	26	83	276	82	43	70	74	72	275	347	231	235	196	208
YFL004W	399	185	434	1947	542	301	499	363	413	1834	1959	1639	1833	1603	1535
YFL005W	954	612	1571	1029	647	307	437	449	468	792	829	693	964	819	624
YFL007W	463	232	557	2783	788	423	474	452	498	3934	3723	3015	3262	2857	2551
YFL008W	452	186	319	2163	1216	591	738	975	711	2820	2937	2137	1703	1550	1451
YFL009W	158	81	155	502	117	63	121	95	94	967	892	765	944	829	787
YFL010C	64	27	65	270	102	53	88	38	43	475	490	347	455	414	369
YFL010W-A	140	104	176	330	148	100	122	106	104	298	277	176	299	226	182
YFL011W	8	3	2	28	3	1	5	3	2	36	143	23	25	27	30
YFL012W-A	5	8	9	156	53	30	43	39	30	122	168	87	74	68	55
YFL012W	23	12	34	84	38	12	26	39	12	48	78	21	29	26	25
YFL013C	133	90	131	938	437	212	286	306	228	1170	1248	765	893	693	756
YFL013W-A	190	186	308	592	304	123	224	209	220	209	291	192	162	158	116
YFL014W	494	77	253	509	962	428	235	645	541	828	544	450	330	341	244
YFL015C	31	19	22	43	42	12	14	17	21	7	24	3	5	2	4
YFL015W-A	1	1	0	8	4	0	2	1	2	0	4	0	0	0	0
YFL016C	213	110	174	680	455	212	226	384	357	925	907	603	616	579	498
YFL017C	109	33	126	57	33	14	22	16	26	201	187	144	133	103	104
YFL017W-A	92	28	132	47	37	13	17	15	13	21	24	27	46	44	25
YFL018C	153	53	156	741	366	205	268	281	269	1179	1117	835	833	832	673
YFL019C	11	1	4	9	8	2	3	7	3	13	36	23	11	6	12
YFL020C	9	7	3	44	6	0	17	3	6	50	125	80	39	36	39
YFL021C-A	6	7	5	104	26	14	38	16	21	112	131	118	137	118	109
YFL021W	49	36	59	365	121	55	88	42	41	826	639	563	998	784	716
YFL022C	218	124	194	835	260	128	281	144	176	1523	1571	1283	1679	1499	1276
YFL023W	168	187	263	1871	480	223	359	299	231	1832	1957	979	1283	998	1371
YFL024C	365	198	424	1606	633	377	548	414	454	1811	1911	1521	1877	1601	1512
YFL025C	124	92	228	671	178	73	165	117	134	1123	1257	1076	1234	1084	913
YFL026W	34	30	98	210	50	18	38	13	28	153	203	121	172	158	140
YFL027C	263	92	345	433	158	76	105	117	117	335	420	275	334	273	253
YFL028C	510	192	595	423	161	82	113	85	92	361	396	357	496	406	326
YFL029C	96	37	92	232	166	75	94	125	124	280	380	234	266	231	186
YFL030W	30	11	33	83	20	9	49	16	29	257	166	139	185	195	160
YFL031C-A	2	0	8	4	0	0	1	0	1	3	3	5	10	7	4
YFL031W	537	342	573	806	371	162	231	201	273	1328	1057	1146	2206	1794	1335
YFL032W	6	4	2	11	2	1	4	1	0	4	13	5	8	9	3
YFL033C	230	142	262	1628	512	285	403	379	406	2076	2323	1568	2008	1699	1522
YFL034C-A	360	161	560	581	278	173	0	0	0	470	430	463	744	719	497
YFL034C-B	61	35	66	261	104	55	109	65	59	514	542	449	617	498	441
YFL034W	242	147	262	1061	439	200	538	363	465	1646	1770	1126	1403	1120	1098
YFL036W	402	348	751	2744	1027	535	762	859	756	2298	2179	1688	2351	1978	1736
YFL037W	115	66	92	468	196	90	144	148	161	893	876	796	771	769	581
YFL038C	398	194	618	1349	847	418	530	647	603	1051	1070	811	1164	939	810
YFL039C	224	58	197	1770	918	561	646	565	614	1710	1575	1585	1774	1790	1445
YFL040W	26	12	24	101	12	6	22	14	13	175	200	111	152	114	125
YFL041W-A	0	5	4	7	1	2	0	0	1	3	18	3	4	4	3
YFL041W	101	72	116	473	240	119	167	128	125	961	970	842	1027	834	688
YFL042C	120	74	108	492	227	85	147	168	138	503	727	402	531	436	363
YFL044C	91	25	84	239	152	58	72	78	87	203	265	197	260	228	198
YFL045C	462	144	511	390	176	61	144	149	171	536	434	610	711	688	477
YFL046W	402	161	382	309	156	94	114	151	129	280	320	200	208	161	150
YFL047W	94	74	143	516	127	79	162	101	118	923	994	748	953	766	724
YFL048C	424	163	503	565	244	98	187	157	180	914	868	821	1058	907	706
[truncated: 4,601 more rows]

## Sheet: tp50
ORF	Sample1_groupwt	Sample2_groupwt	Sample3_groupwt	Sample1_grouprpl22a	Sample2_grouprpl22a	Sample3_grouprpl22a	Sample1_grouprpl22b	Sample2_grouprpl22b	Sample3_grouprpl22b	Sample1_grouprpl34a	Sample2_grouprpl34a	Sample3_grouprpl34a	Sample1_grouprpl34b	Sample2_grouprpl34b	Sample3_grouprpl34b
Q0010	19	10	18	10	8	9	8	5	13	30	6	3	7	19	6
Q0017	0	0	1	0	0	0	1	0	1	4	1	1	2	2	1
Q0032	0	0	0	0	0	0	0	0	0	0	0	0	0	0	0
Q0045	106	108	156	168	230	137	454	194	295	3131	3131	1751	5594	11790	5249
Q0050	839	652	773	1607	1930	1065	2399	1039	1400	18130	13252	10266	21133	40228	17744
Q0055	442	336	441	1045	1358	652	1904	770	1133	17234	13021	9682	20773	41406	17949
Q0060	43	21	24	68	106	35	115	42	63	1306	947	562	1527	2639	1532
Q0065	31	32	22	60	81	38	71	32	27	1526	1188	487	1901	2671	1816
Q0070	44	31	27	163	303	102	319	115	124	1166	728	682	1160	1810	1234
Q0075	16	23	20	22	17	14	33	12	15	443	284	154	610	1023	585
Q0080	0	1	0	1	0	0	0	0	0	3	2	4	5	11	9
Q0085	33	29	26	104	135	47	160	59	88	1405	1334	731	2409	4786	2135
Q0092	0	0	0	0	0	0	0	0	0	0	0	0	0	0	0
Q0105	179	144	133	266	308	215	557	203	392	5709	5587	2905	6740	14345	6066
Q0110	40	29	14	62	109	55	131	38	80	678	476	355	776	1384	941
Q0115	26	18	10	18	19	10	31	5	12	286	224	121	380	636	547
Q0120	51	47	31	132	197	100	176	99	101	885	623	402	889	1535	922
Q0130	67	56	36	49	70	62	132	49	114	179	219	160	442	755	519
Q0140	7	9	6	10	10	7	9	8	5	30	18	19	77	121	82
Q0142	2	0	1	2	0	0	0	0	0	6	6	1	16	14	9
Q0143	0	0	0	0	0	0	1	0	0	2	1	1	4	1	1
Q0144	1	0	0	0	0	0	0	0	0	0	0	0	0	0	1
Q0160	22	23	24	6	9	3	17	3	16	188	169	79	380	530	378
Q0182	3	5	3	2	0	3	1	1	0	30	10	2	24	46	20
Q0250	123	109	71	203	275	99	450	154	367	2519	2192	1256	3957	6958	3829
Q0255	13	10	10	33	43	16	44	25	21	369	263	164	527	970	517
Q0275	31	39	26	59	73	34	138	41	91	1306	1268	685	2503	5194	2574
Q0297	0	0	0	0	0	0	0	0	0	3	2	0	4	10	5
YAL001C	215	111	115	186	288	113	388	212	209	1541	1206	1302	1018	1232	1154
YAL002W	130	88	118	113	129	87	238	133	112	1191	891	785	985	1282	846
YAL003W	663	576	843	3441	7610	2325	5960	2866	1894	3326	2423	3498	3637	2618	2387
YAL004W	0	0	0	8	5	37	105	54	46	140	149	183	114	51	171
YAL005C	716	448	209	630	596	423	792	490	632	1621	1471	807	1122	3841	1894
YAL007C	222	142	89	222	316	104	335	169	140	555	569	523	459	447	512
YAL008W	271	232	158	19	22	14	45	15	36	267	153	168	129	237	130
YAL009W	166	117	136	56	83	29	95	55	63	273	189	234	236	268	162
YAL010C	165	128	137	74	144	65	160	67	92	297	277	261	271	397	250
YAL011W	139	112	155	252	324	112	347	181	99	907	621	929	751	591	426
YAL012W	116	126	112	234	327	227	482	234	216	713	913	781	980	1119	808
YAL013W	197	133	227	235	383	157	421	319	130	505	353	542	409	303	287
YAL014C	47	34	33	33	76	33	57	37	43	200	151	177	251	259	186
YAL015C	231	170	196	84	102	38	123	74	51	262	157	271	182	244	130
YAL016C-A	26	18	19	86	108	69	132	94	86	135	121	104	129	155	105
YAL016C-B	3	3	4	0	0	0	0	0	0	3	0	0	4	2	3
YAL016W	474	314	258	285	457	212	457	238	321	1029	885	750	980	1234	953
YAL017W	417	234	180	361	556	284	644	382	328	1895	1521	1247	1168	2081	1397
YAL018C	1	2	4	1	4	1	3	0	2	10	11	16	22	15	17
YAL019W-A	41	28	41	22	28	17	44	25	16	87	64	106	65	38	34
YAL019W	353	360	490	850	972	456	1098	678	498	3209	2203	3210	3373	2538	1949
YAL020C	98	82	87	34	42	30	42	24	27	240	174	236	209	224	183
YAL021C	128	103	96	224	251	156	380	203	218	1612	1539	1536	1862	1900	1280
YAL022C	94	60	81	131	159	103	223	131	134	607	568	599	909	856	706
YAL023C	252	181	204	287	318	177	510	277	327	2333	2342	1991	2507	2643	2145
YAL024C	80	35	75	786	1283	351	1104	726	373	1840	1683	1922	1374	1210	1367
YAL025C	954	929	2550	895	1237	503	1375	952	476	1435	753	1713	1188	683	669
YAL026C-A	155	160	195	134	210	64	195	128	59	98	107	131	86	128	104
YAL026C	200	166	194	249	325	158	501	261	230	1978	1643	1652	2042	2168	1591
YAL027W	219	122	137	221	308	120	314	147	143	266	204	273	226	230	170
YAL028W	151	77	55	66	99	58	123	58	70	257	261	215	166	361	229
YAL029C	406	251	225	680	824	399	1008	604	463	2497	2058	2095	1985	2596	1675
YAL030W	148	63	54	98	231	85	150	72	81	97	68	74	103	106	59
YAL031C	60	35	33	45	87	41	107	43	45	492	414	333	411	607	400
YAL031W-A	18	16	4	10	2	8	16	5	11	24	16	13	16	32	22
YAL032C	79	69	98	264	397	165	443	232	163	705	500	713	612	555	432
YAL033W	186	262	301	142	181	63	177	81	65	260	184	296	299	343	245
YAL034C-B	6	10	10	21	41	15	57	25	14	33	43	60	40	33	37
YAL034C	176	89	67	54	71	40	103	37	61	462	409	324	384	457	325
YAL034W-A	185	131	164	229	425	113	369	191	124	297	179	318	221	164	179
YAL035W	860	733	1492	2150	3223	1603	3477	2529	1519	4524	3298	4442	4596	3285	2667
YAL036C	75	86	109	68	70	37	95	52	54	556	383	550	684	503	438
YAL037C-A	0	0	0	0	0	0	0	0	0	0	0	0	0	0	0
YAL037C-B	239	255	204	18	16	123	22	34	0	198	387	371	229	182	146
YAL037W	77	54	49	41	47	18	42	22	39	103	114	104	154	161	143
YAL038W	428	371	274	848	911	624	1752	697	1791	3239	3220	2315	3485	5566	3348
YAL039C	102	86	78	55	76	60	119	49	64	463	289	398	510	428	258
YAL040C	108	101	79	71	62	49	120	33	68	526	379	387	718	618	419
YAL041W	342	230	308	351	442	251	522	276	290	1375	1107	1193	1375	1385	1095
YAL042C-A	47	28	47	40	54	65	67	61	60	201	149	130	145	132	119
YAL042W	363	305	359	270	356	201	493	312	236	1605	1471	1861	1840	1675	1380
YAL043C	140	96	98	210	222	157	334	142	180	1313	1107	1324	1380	1308	973
YAL044C	137	104	99	83	123	50	174	90	146	343	446	375	277	421	416
YAL044W-A	28	25	21	13	20	7	14	2	8	81	35	55	99	106	71
YAL045C	27	5	16	100	101	126	115	54	60	35	31	6	23	13	18
YAL046C	20	4	5	20	26	16	35	11	25	50	44	38	56	66	56
YAL047C	177	114	139	202	330	107	262	158	93	394	257	316	334	356	276
YAL047W-A	1	4	5	2	0	2	0	0	1	13	11	9	12	14	12
YAL048C	56	33	35	81	116	59	161	112	79	426	337	331	491	519	386
YAL049C	194	165	111	198	263	107	306	180	142	361	257	342	227	316	215
YAL051W	173	110	120	228	258	120	323	150	163	1369	994	1084	1521	1427	1215
YAL053W	140	124	142	159	196	84	248	97	174	1458	1087	1072	1682	2080	1138
YAL054C	42	32	25	37	38	26	100	35	62	1512	1444	728	328	620	474
YAL055W	170	66	83	142	270	104	253	146	120	174	115	148	66	67	49
YAL056C-A	17	10	19	16	8	6	17	14	16	55	46	47	53	55	33
YAL056W	595	439	471	363	513	211	608	325	310	1609	1166	1351	1420	1574	1007
YAL058W	50	41	65	121	177	65	158	101	59	607	469	561	606	618	426
YAL059C-A	0	3	8	32	37	18	53	25	11	82	30	60	9	7	0
YAL059W	433	778	1037	319	348	168	301	184	158	578	385	523	722	569	383
YAL060W	208	91	58	100	147	125	178	97	91	298	283	229	277	690	314
YAL061W	683	285	176	203	352	249	351	191	217	695	572	482	375	640	567
YAL062W	80	81	87	51	65	67	129	53	69	685	572	512	502	730	329
YAL063C-A	8	6	6	1	2	0	2	0	1	14	8	8	9	8	7
YAL063C	111	65	144	117	186	78	249	126	92	733	509	711	515	527	450
YAL064C-A	2	0	5	7	7	3	7	2	6	51	47	49	46	57	42
YAL064W-B	5	2	9	20	24	17	23	20	15	71	54	58	39	34	32
YAL064W	5	2	8	1	0	1	5	1	2	6	4	0	5	3	7
YAL065C	1	0	0	1	1	0	4	1	3	23	23	15	20	23	12
YAL066W	1	0	0	0	1	1	0	0	0	3	1	4	1	0	0
YAL067C	21	16	30	53	80	19	73	58	27	128	104	123	81	58	74
YAL067W-A	0	0	1	1	0	1	0	0	1	1	0	1	0	4	1
YAL068C	3	3	0	0	4	11	17	0	3	5	6	9	2	12	0
YAL068W-A	1	0	1	1	0	0	2	0	1	0	0	0	0	0	0
YAL069W	7	0	21	8	9	10	20	7	5	2	4	13	5	4	0
YAR002C-A	304	162	193	790	1481	648	1058	601	495	594	600	675	655	619	676
YAR002W	251	187	226	972	1549	578	1402	827	485	1282	1003	1213	1203	1033	909
YAR003W	556	359	420	190	250	94	246	139	105	454	313	426	358	331	283
YAR007C	220	150	100	281	368	117	334	204	199	874	709	861	843	967	787
YAR008W	511	463	324	206	297	65	305	210	90	398	319	515	264	267	253
YAR014C	265	208	370	377	498	192	590	400	272	1821	1266	1924	1726	1295	1072
YAR015W	60	70	106	110	247	89	452	207	283	843	762	831	1047	862	907
YAR018C	36	33	34	37	106	25	95	44	47	186	256	186	291	233	127
YAR019C	81	48	59	76	96	43	142	52	77	589	445	468	603	696	451
YAR019W-A	3	1	1	6	14	6	13	4	3	33	24	41	28	29	38
YAR020C	0	0	2	0	0	0	0	0	2	7	3	4	7	8	9
YAR023C	33	25	20	21	29	11	29	13	12	54	27	31	51	54	50
YAR027W	560	363	251	103	162	59	147	83	90	205	181	163	247	333	276
YAR028W	270	126	86	55	72	31	92	31	47	203	240	201	236	282	375
YAR029W	40	26	14	13	17	6	36	23	13	51	39	52	37	59	59
YAR030C	134	79	86	128	255	56	176	123	38	56	47	68	34	64	82
YAR031W	27	17	14	85	141	43	153	83	28	206	192	176	193	252	202
YAR033W	99	92	72	85	123	42	134	72	44	179	150	172	145	223	185
YAR035C-A	0	0	0	0	0	0	0	0	0	0	0	0	0	0	0
YAR035W	17	13	41	90	126	84	213	78	149	1167	1194	807	402	666	384
YAR042W	199	102	137	346	411	211	555	270	238	1998	1651	1637	1791	1984	1394
YAR047C	2	4	2	10	7	4	12	8	5	67	54	49	57	66	41
YAR050W	49	30	78	81	65	44	185	74	72	814	649	785	537	566	558
YAR053W	45	36	53	13	33	4	39	25	7	51	32	36	28	26	20
YAR060C	3	1	2	4	3	1	4	1	2	40	24	26	28	36	28
YAR064W	4	2	8	2	7	4	6	9	8	26	14	19	24	25	24
YAR066W	7	8	12	37	17	17	38	21	19	154	102	130	89	113	190
YAR068W	0	4	0	24	18	21	22	9	21	137	107	158	142	87	142
YAR069C	2	2	5	1	1	0	3	1	1	6	5	4	3	2	3
YAR070C	4	0	3	1	0	0	0	1	4	0	2	0	2	0	0
YAR071W	72	98	47	53	35	15	73	47	43	170	80	151	268	339	126
YAR073W	7	3	12	5	7	12	15	1	9	21	17	37	37	37	29
YAR075W	2	0	16	12	8	4	8	2	4	0	2	4	6	2	0
YBL001C	1977	1053	1144	688	1042	498	964	579	554	429	310	410	262	351	285
YBL002W	87	80	48	181	366	169	394	190	241	446	543	325	368	284	529
YBL003C	403	362	142	138	273	119	333	188	263	334	517	321	372	359	755
YBL004W	602	872	1689	1371	1394	780	1810	1060	960	6815	4614	5659	9177	7130	5480
YBL005W	111	110	145	100	150	58	193	106	127	777	612	585	892	997	589
YBL006C	154	154	144	168	262	97	245	116	98	481	380	417	680	651	400
YBL006W-A	0	0	0	0	0	1	0	0	0	0	0	0	0	0	0
YBL007C	374	210	202	440	503	270	734	377	432	2918	2724	2438	2804	3590	2466
YBL008W-A	3	1	4	1	1	0	2	3	0	10	13	11	9	14	2
YBL008W	45	48	69	156	223	92	303	215	95	787	591	825	636	629	523
YBL009W	64	55	51	157	223	77	278	165	133	648	669	723	624	531	585
YBL010C	142	66	66	187	300	106	277	144	92	589	357	501	401	307	317
YBL011W	546	228	862	217	224	105	296	178	152	1207	1122	999	1255	1502	972
YBL012C	12	7	9	17	23	11	39	22	13	142	142	116	134	160	114
YBL013W	15	3	8	32	40	27	53	29	36	278	220	172	268	316	224
YBL014C	105	99	152	333	293	193	423	263	206	1525	1165	1330	1675	1458	988
YBL015W	176	88	41	35	47	24	117	50	90	441	445	335	371	813	408
YBL016W	13	9	22	13	29	5	36	13	12	87	64	80	112	125	74
YBL017C	431	326	338	628	745	346	1060	636	509	3395	3195	3055	2697	3688	2501
YBL018C	44	85	52	17	19	4	38	11	10	133	97	101	134	155	122
YBL019W	162	85	63	43	63	27	113	50	42	290	204	235	186	248	199
YBL020W	139	121	113	227	330	145	405	222	202	971	828	929	927	947	836
YBL021C	146	73	95	152	206	61	207	93	73	287	169	251	242	203	216
YBL022C	281	230	210	676	825	439	932	546	511	2336	1834	1724	1890	2202	1311
YBL023C	229	208	236	647	763	281	826	508	282	1587	1105	1519	1653	1480	887
YBL024W	180	194	358	821	1232	561	1214	816	453	2008	1471	1885	2422	1943	1441
YBL025W	58	27	70	159	274	113	288	189	114	270	213	284	232	211	185
YBL026W	261	326	268	87	141	69	119	71	78	183	143	120	219	256	201
YBL027W	1965	1280	1671	2749	4147	1838	4260	1809	2687	3445	2900	3402	4752	3573	3785
YBL028C	756	902	1941	879	1421	619	1188	668	458	523	315	530	540	415	310
YBL029C-A	76	63	29	19	25	14	31	9	16	56	37	28	51	66	57
YBL029W	380	261	264	145	173	90	234	137	156	371	315	299	314	320	443
YBL030C	279	235	102	95	120	102	207	99	168	592	486	440	539	565	537
YBL031W	107	65	69	740	1539	462	1025	563	364	375	494	518	287	302	382
YBL032W	192	144	138	424	744	365	787	486	358	823	938	936	844	830	851
YBL033C	108	82	105	129	190	85	226	128	105	691	533	570	763	769	503
YBL034C	211	168	141	524	718	205	727	466	257	1580	1429	1343	1368	1399	1281
YBL035C	280	193	160	287	362	120	406	246	163	863	702	862	915	924	760
YBL036C	997	916	1260	258	309	138	431	237	216	589	371	569	527	487	358
YBL037W	104	73	74	125	163	71	289	151	154	787	733	673	670	766	724
YBL038W	365	232	208	115	184	62	215	122	93	584	407	466	422	507	360
YBL039C-A	0	0	0	0	0	0	0	0	0	0	0	0	0	0	0
YBL039C	192	300	455	361	378	200	492	271	285	2044	1393	1818	2718	1967	1530
YBL039W-B	49	32	8	2	1	0	6	1	3	12	13	6	4	10	5
YBL040C	744	624	599	163	301	137	249	152	124	434	384	438	386	483	370
YBL041W	362	263	234	213	288	136	271	148	173	554	472	515	553	618	366
YBL042C	67	106	164	101	109	53	279	178	122	1096	1088	868	1620	1704	995
YBL043W	49	58	99	148	217	96	183	98	107	358	308	238	163	212	106
YBL044W	2	0	0	0	1	4	3	0	2	10	7	5	3	4	1
YBL045C	353	248	99	101	133	68	154	54	104	579	417	363	384	651	474
YBL046W	216	118	150	404	630	197	604	419	239	660	445	859	419	291	359
YBL047C	690	385	340	964	1248	711	1634	860	828	4703	3736	3388	3457	4608	3032
YBL048W	31	23	12	34	75	30	50	28	15	102	73	71	47	53	46
YBL049W	171	85	58	26	29	16	34	23	20	126	101	102	82	96	75
YBL050W	710	405	363	273	445	180	505	254	236	613	432	508	531	670	470
YBL051C	208	129	137	261	387	173	424	184	200	985	1012	719	871	1226	680
YBL052C	225	116	136	284	465	91	492	365	139	715	549	669	450	478	453
YBL053W	329	231	305	267	491	153	386	299	127	103	63	130	42	10	23
YBL054W	159	237	459	847	1020	601	966	575	411	1676	1150	1612	2122	1356	1014
YBL055C	138	167	197	105	115	55	161	65	77	625	464	517	745	840	504
YBL056W	316	276	235	245	315	142	355	160	222	780	681	602	1015	1199	832
YBL057C	315	208	284	432	623	324	509	340	338	383	370	365	480	442	389
YBL058W	348	225	193	305	406	202	426	217	240	1105	892	923	1002	1078	746
YBL059C-A	303	257	208	333	605	189	374	232	160	164	131	155	107	181	141
YBL059W	111	57	67	318	433	221	370	224	184	283	207	306	244	227	238
YBL060W	315	236	281	255	320	165	401	260	166	687	474	750	478	500	397
YBL061C	137	125	169	160	183	91	231	139	107	1078	759	999	1198	1039	679
YBL062W	108	145	194	52	47	28	56	40	41	83	63	94	64	69	66
YBL063W	198	142	106	246	414	98	379	173	193	659	669	602	631	658	716
YBL064C	140	95	37	43	58	32	79	36	46	285	274	161	158	415	213
YBL065W	2	2	5	13	9	4	10	3	4	54	41	37	41	50	32
YBL066C	101	77	86	272	295	157	438	246	185	1380	1065	1055	1077	1186	912
YBL067C	365	324	348	387	435	231	589	288	309	1547	1123	1216	1264	1271	969
YBL068W-A	2	1	4	3	0	9	2	2	0	0	0	0	0	4	1
YBL068W	96	160	136	147	222	87	238	118	105	548	402	459	785	600	492
YBL069W	162	86	77	73	87	45	129	88	59	656	371	633	612	513	548
YBL070C	26	14	21	22	13	7	30	8	23	192	98	108	117	91	100
YBL071C-B	0	0	0	0	0	0	0	0	0	0	0	0	0	0	0
YBL071C	25	33	28	27	21	15	48	15	28	158	86	113	224	212	134
YBL071W-A	20	26	27	193	295	82	243	143	109	229	129	242	278	194	192
YBL072C	1124	627	815	1997	3355	1439	2758	1418	2063	1956	1590	1577	2861	2117	2196
YBL073W	10	7	5	3	8	6	17	4	7	91	67	60	77	98	57
YBL074C	55	30	25	149	237	77	285	194	103	472	397	424	454	489	301
YBL075C	160	98	111	130	167	62	513	247	156	1659	1282	1375	825	839	884
YBL076C	805	660	787	1229	1797	894	2066	1040	1038	3684	3223	3262	4517	4311	3453
YBL077W	227	285	253	19	24	4	45	9	44	87	80	79	126	181	147
YBL078C	261	134	153	85	126	91	146	74	108	193	125	94	96	163	90
YBL079W	356	280	352	508	577	343	880	471	471	3189	2500	2755	3310	2997	2249
YBL080C	75	49	37	126	224	59	250	137	104	329	271	325	236	333	217
YBL081W	197	188	293	225	248	155	269	109	110	791	590	719	765	492	393
YBL082C	12	24	34	25	38	37	62	35	49	160	156	160	357	311	289
YBL083C	5	11	4	7	5	2	15	2	4	23	21	33	45	41	44
YBL084C	147	70	119	205	283	112	260	120	136	729	500	522	676	680	479
YBL085W	284	124	169	657	1216	363	1155	760	503	1385	1468	1420	1208	1520	1094
YBL086C	391	186	142	520	906	376	661	416	295	575	483	630	516	584	453
YBL087C	436	264	247	342	390	243	592	235	421	723	632	670	1275	1006	1033
YBL088C	251	138	152	294	368	208	506	278	270	2279	1685	1710	1893	2422	1873
YBL089W	135	96	86	107	217	74	243	139	101	475	327	373	436	485	379
YBL090W	470	398	297	129	187	65	197	90	107	238	196	217	235	288	186
YBL091C-A	141	37	52	244	340	166	383	160	180	216	211	225	233	337	214
YBL091C	288	171	224	439	596	377	760	492	394	1106	845	1089	814	904	621
YBL092W	1007	635	997	1589	2585	1376	3015	1391	2148	1584	1258	1478	2653	1730	1980
YBL093C	744	480	935	776	1019	404	1013	533	515	954	653	951	928	890	472
YBL094C	35	25	26	7	7	8	17	9	17	29	23	15	31	39	22
YBL095W	44	57	39	41	66	12	77	42	48	271	250	256	226	256	262
YBL096C	14	13	19	7	16	1	21	12	7	70	48	44	41	28	30
YBL097W	119	40	95	195	256	71	453	342	150	724	566	921	462	406	409
YBL098W	167	101	91	412	662	174	586	271	246	481	387	486	383	360	408
YBL099W	363	251	113	319	489	394	700	330	531	1535	1280	1277	996	1429	1101
YBL100C	8	4	2	6	11	1	14	1	10	101	58	25	59	67	63
YBL100W-C	1	2	0	1	1	1	5	1	1	9	4	4	8	7	5
YBL101C	235	113	175	236	357	238	501	237	299	1747	1230	1103	1197	1467	1043
YBL102W	86	81	52	27	41	18	47	19	25	157	137	104	241	285	207
YBL103C	205	104	137	493	744	269	768	520	348	918	752	1003	818	773	649
YBL104C	118	76	122	155	189	77	272	172	123	1012	835	871	1033	1059	808
YBL105C	223	142	215	417	388	246	701	356	327	2476	2045	2246	2139	2397	1720
YBL106C	127	79	110	157	191	77	262	141	74	569	494	530	547	672	504
YBL107C	1025	538	714	405	643	253	572	361	245	332	244	322	311	239	196
YBL107W-A	4	1	0	0	0	0	0	0	0	2	3	0	1	5	3
YBL108C-A	2	1	11	4	5	9	6	1	12	3	0	5	3	2	5
YBL108W	0	0	1	0	2	0	1	0	1	1	0	3	0	2	0
YBL109W	8	6	32	22	14	14	34	16	22	10	7	21	2	5	2
YBL111C	4	0	0	0	0	0	0	0	0	0	0	0	0	2	0
YBL112C	23	16	9	0	0	0	0	0	0	0	4	0	2	4	1
YBL113C	216	165	121	93	147	73	191	90	76	528	412	567	447	485	468
YBL113W-A	81	0	26	69	72	17	99	100	16	145	73	191	105	59	57
YBR001C	224	134	134	148	224	109	287	173	141	1046	720	824	973	1013	831
YBR002C	146	147	209	281	375	193	517	325	194	811	518	836	795	713	572
YBR003W	142	88	63	126	149	76	200	129	104	456	375	402	322	647	361
YBR004C	148	115	117	27	39	14	45	21	23	286	165	163	424	449	304
YBR005W	33	38	52	26	53	18	59	19	42	150	89	134	365	412	181
YBR006W	326	256	179	217	330	108	294	175	123	502	290	345	701	654	420
YBR007C	135	105	127	228	329	128	505	265	190	1075	1224	1045	1194	1259	1199
YBR008C	47	34	43	31	33	21	52	26	29	253	245	239	277	303	239
YBR009C	295	194	140	132	308	73	280	150	283	201	320	252	270	225	505
YBR010W	324	268	187	303	502	220	595	280	421	678	894	615	820	741	994
YBR011C	361	243	184	779	1423	703	1377	724	845	1186	1308	1159	933	1358	1014
YBR012C	28	37	35	6	11	2	9	3	3	43	32	30	58	90	37
YBR013C	116	102	38	12	21	7	18	9	8	65	47	59	59	89	66
YBR014C	799	415	356	354	515	295	412	220	254	654	498	535	464	514	454
YBR015C	227	227	216	276	317	155	430	255	234	1659	1544	1483	1866	1875	1573
YBR016W	230	112	188	276	490	267	285	209	170	404	256	331	328	373	189
YBR017C	337	266	318	568	779	350	783	487	359	2175	1537	1912	2408	2096	1606
YBR018C	25	11	12	17	31	9	22	10	16	12	17	30	23	46	52
YBR019C	6	5	21	12	20	12	26	14	10	152	134	103	134	218	178
YBR020W	13	10	22	24	34	25	47	26	17	140	115	116	140	169	125
YBR021W	95	104	133	103	138	68	239	143	94	709	578	573	660	804	412
YBR022W	236	218	134	54	69	18	74	44	35	197	136	154	176	240	174
YBR023C	346	348	473	408	440	244	616	378	289	2417	1855	2305	2472	2311	1873
YBR024W	163	75	61	23	20	11	53	14	19	165	123	104	93	218	102
YBR025C	418	285	372	889	1414	658	1656	850	877	2156	1799	1926	2209	1880	1728
YBR026C	389	195	122	58	83	38	100	60	62	319	279	192	128	405	240
YBR027C	18	14	17	5	1	1	11	2	5	5	6	3	3	3	6
YBR028C	130	135	155	318	680	196	491	291	162	897	682	764	896	848	654
YBR029C	121	174	187	103	153	72	143	56	70	498	442	372	864	915	601
YBR030W	65	88	103	262	341	189	343	209	150	637	512	681	916	760	625
YBR031W	489	355	287	354	379	294	623	277	494	1333	1315	1110	2384	1762	1864
YBR032W	5	8	10	5	3	1	1	0	2	29	30	18	40	35	24
YBR033W	91	63	97	89	95	39	214	97	101	624	672	537	723	1067	431
YBR034C	296	305	424	582	643	374	739	323	403	1338	952	1051	1884	1528	869
YBR035C	194	128	84	100	97	57	132	48	94	276	218	266	302	453	275
YBR036C	167	129	127	57	92	49	118	75	94	522	481	414	707	763	595
YBR037C	183	84	69	120	202	109	268	180	88	311	236	352	227	329	252
YBR038W	24	19	46	39	70	66	227	67	148	359	547	333	533	406	356
YBR039W	378	175	147	352	620	295	829	389	420	1082	834	737	656	846	679
YBR040W	5	6	11	2	3	0	9	1	1	7	14	17	13	10	8
YBR041W	259	161	171	198	324	107	357	159	155	912	727	721	866	983	835
YBR042C	248	214	274	129	158	69	164	71	84	402	393	344	419	509	358
YBR043C	231	207	212	231	292	124	417	250	180	1394	984	1261	1071	1172	887
YBR044C	152	87	68	100	201	56	189	88	72	429	347	359	329	422	280
YBR045C	150	78	210	73	145	52	138	76	53	470	333	273	327	492	246
YBR046C	115	107	156	27	40	30	65	33	38	356	211	231	434	510	266
YBR047W	352	211	359	62	89	38	105	47	65	158	91	102	157	208	110
YBR048W	464	335	415	582	928	686	1233	696	567	1143	1029	1319	1537	1245	1261
YBR049C	278	123	120	737	1160	502	1122	606	573	1790	1671	1767	1485	1426	1517
YBR050C	58	48	54	70	93	32	153	74	106	472	371	288	164	204	146
YBR051W	12	10	9	21	26	4	62	20	26	92	81	43	21	27	25
YBR052C	285	176	116	89	87	37	83	51	58	198	156	140	174	339	192
YBR053C	359	151	85	82	109	58	137	71	83	284	220	168	102	350	158
YBR054W	1173	436	326	534	524	294	628	372	320	1723	927	818	992	1154	1465
YBR055C	181	154	193	499	578	281	687	403	336	1638	1049	1332	1708	1420	1148
YBR056C-B	8	9	15	0	4	0	6	3	1	15	11	27	35	43	17
YBR056W-A	6	24	35	5	10	4	8	1	9	20	18	24	58	75	28
YBR056W	953	518	327	49	68	43	116	68	78	399	289	217	178	691	258
YBR057C	368	281	370	431	622	248	499	280	214	803	583	722	642	666	518
YBR058C-A	761	583	787	251	433	214	294	175	146	65	49	55	93	112	75
YBR058C	127	121	118	215	299	104	318	178	147	1121	826	897	1164	1143	766
YBR059C	241	119	128	420	560	286	703	334	373	1683	1352	1313	1067	1916	1083
YBR060C	103	83	94	256	330	186	401	280	168	801	622	663	757	671	622
YBR061C	63	65	91	94	108	50	142	54	69	476	297	378	683	535	442
YBR062C	466	317	339	104	134	80	135	67	86	226	126	192	232	283	161
YBR063C	87	90	91	50	53	14	61	24	16	443	265	286	440	434	250
YBR064W	10	0	0	18	13	9	15	9	13	38	36	51	28	29	31
YBR065C	34	31	42	189	230	91	246	138	71	624	423	605	643	590	400
YBR066C	221	248	351	404	590	143	917	508	277	498	418	526	350	568	247
YBR067C	82	263	286	121	179	72	259	84	174	280	313	319	600	726	547
YBR068C	639	413	540	861	1255	686	1126	582	657	2792	1720	2353	3405	3344	1875
YBR069C	136	143	203	179	168	96	248	98	175	1114	811	739	1718	1617	1012
YBR070C	17	24	13	42	57	17	61	30	36	184	180	162	201	206	191
YBR071W	161	112	59	312	528	232	430	244	221	500	462	598	469	444	427
YBR072C-A	2	1	0	0	1	0	0	0	0	2	4	3	0	1	1
YBR072W	324	193	108	192	290	117	1381	692	325	558	763	536	287	1048	755
YBR073W	155	134	86	148	235	71	250	124	74	657	471	688	623	516	522
YBR074W	344	247	275	366	426	205	534	279	312	2114	1474	1689	2134	1962	1563
YBR076C-A	22	19	18	28	45	15	31	23	33	39	34	38	59	55	48
YBR076W	20	21	18	8	11	3	27	10	16	58	62	52	79	97	68
YBR077C	99	71	54	52	75	18	79	53	39	238	151	185	222	216	197
YBR078W	193	169	137	356	485	276	637	224	494	1444	1712	1030	2493	2180	2004
YBR079C	495	498	590	1519	1860	1042	2284	1359	1143	4639	3393	4388	5321	4074	3482
YBR080C	134	145	114	263	388	178	495	298	268	1174	924	1094	1265	1491	1022
YBR081C	328	176	272	857	1223	364	1278	867	499	1814	1346	1791	1371	1395	1158
YBR082C	470	337	591	736	1359	563	916	427	498	715	603	607	859	804	498
YBR083W	84	46	76	230	350	146	315	148	143	556	446	458	449	471	301
YBR084C-A	1756	1229	1854	3527	5850	2236	6016	2866	3133	3000	2536	3222	3744	2693	2732
YBR084W	316	268	349	448	451	255	603	320	397	3124	2552	2823	3650	3129	2556
YBR085C-A	652	502	465	92	121	51	107	51	57	218	150	180	182	247	167
YBR085W	13	13	17	21	26	12	63	28	26	71	101	92	76	146	123
YBR086C	505	299	192	497	864	393	885	517	447	1947	2129	1583	1505	2431	1849
YBR087W	99	76	49	79	158	29	93	36	42	218	193	160	243	233	253
YBR088C	65	55	26	70	108	26	86	40	58	226	230	174	262	258	308
YBR089C-A	358	285	521	370	685	326	538	336	324	242	215	277	272	239	234
YBR089W	23	8	2	77	112	36	44	30	41	12	15	28	25	32	68
YBR090C	111	100	205	188	293	176	314	176	154	194	113	150	139	142	88
YBR091C	30	38	49	24	41	22	29	18	29	67	47	47	101	101	65
YBR092C	36	70	47	40	56	33	148	38	71	382	376	300	644	518	499
YBR093C	82	240	141	50	54	23	154	58	137	274	198	233	626	853	314
YBR094W	115	129	70	122	174	83	237	132	124	644	569	574	531	587	500
YBR095C	297	207	278	499	638	304	677	367	318	857	598	761	831	728	631
YBR096W	211	175	83	32	45	18	51	26	38	159	121	92	211	296	232
YBR097W	211	151	112	162	276	95	287	174	147	793	685	583	497	870	634
YBR098W	119	60	99	525	1039	247	780	532	263	733	582	699	560	555	515
YBR099C	0	14	0	0	0	0	0	0	0	0	0	0	0	9	0
YBR101C	277	224	242	185	267	109	268	119	114	663	492	506	747	794	610
YBR102C	117	56	64	164	222	101	310	178	106	996	828	908	835	950	678
YBR103C-A	2	1	2	0	0	0	0	0	0	1	0	1	4	2	0
YBR103W	151	115	90	141	236	87	243	168	117	598	483	530	423	421	368
YBR104W	164	252	223	128	203	52	205	117	54	378	309	410	376	421	306
YBR105C	481	271	317	617	658	474	764	350	533	2349	1192	1703	2438	2114	1349
YBR106W	374	402	399	383	596	203	470	194	274	922	854	742	1275	1351	926
YBR107C	83	24	36	86	134	36	118	65	49	273	232	262	212	267	171
YBR108W	156	65	81	111	136	91	180	90	102	1102	866	896	816	1112	772
YBR109C	127	133	86	247	455	117	309	167	130	322	234	238	389	362	294
YBR109W-A	6	2	1	7	12	1	8	3	3	50	37	29	25	44	20
YBR110W	241	166	117	201	360	146	329	208	163	547	472	493	556	540	486
YBR111C	714	364	256	266	369	169	360	181	179	511	309	342	298	463	330
YBR111W-A	314	266	188	85	132	65	111	56	60	115	85	84	104	156	95
YBR112C	358	257	338	945	1301	497	1338	753	672	2418	2705	2660	2486	2429	2338
YBR113W	9	11	14	83	120	61	95	43	27	230	223	187	196	203	141
YBR114W	142	130	148	312	319	193	318	154	145	1340	877	1203	1218	1256	717
YBR115C	49	45	39	101	109	55	186	83	115	1529	948	1209	1185	1458	998
YBR116C	21	24	32	19	34	10	39	14	12	78	72	61	67	93	54
YBR117C	92	54	27	24	24	25	77	38	28	358	329	286	254	307	357
YBR118W	1254	953	819	1300	1452	1164	3034	1727	3227	3554	3808	3250	6376	5864	5703
YBR119W	249	160	163	357	655	169	518	332	200	390	287	386	468	442	393
YBR120C	302	258	287	146	216	92	227	104	132	281	197	225	237	264	230
YBR121C-A	0	0	0	0	0	0	0	0	0	0	0	0	0	0	0
YBR121C	722	534	683	840	1121	585	1373	647	868	2578	2159	2284	3100	2476	2222
YBR122C	243	156	238	466	893	255	702	434	220	424	280	396	294	325	244
YBR123C	205	123	119	264	479	165	498	295	228	699	588	669	489	449	465
YBR124W	8	7	6	31	43	15	65	41	39	74	68	64	50	47	42
YBR125C	114	80	45	77	106	75	149	79	83	498	370	400	340	385	285
YBR126C	735	395	230	256	399	220	496	306	307	1093	893	864	874	1795	1129
YBR126W-A	47	23	23	36	60	46	60	32	76	57	42	35	41	49	51
YBR126W-B	4	7	0	4	4	4	13	5	11	14	14	9	21	23	16
YBR127C	685	393	417	1371	2247	1003	2259	1268	1192	2274	2246	1989	2118	2964	1953
YBR128C	290	115	89	49	91	36	92	55	53	135	128	108	75	135	92
YBR129C	234	233	180	77	98	44	140	43	84	348	281	264	366	465	380
YBR130C	124	61	82	519	974	324	636	385	241	709	660	594	671	752	611
YBR131C-A	0	0	0	0	0	0	0	0	0	0	0	0	0	0	0
YBR131W	109	76	100	205	290	119	318	202	146	547	356	445	454	470	342
YBR132C	111	80	90	45	66	47	116	44	68	588	498	392	580	792	406
YBR133C	84	75	94	155	245	109	316	186	163	935	879	797	1109	1248	831
YBR134W	3	2	3	1	2	1	3	1	5	53	59	34	59	81	47
YBR135W	67	52	71	129	201	110	188	95	93	234	184	216	271	256	177
YBR136W	101	38	69	278	307	124	409	235	178	1568	1323	1215	1398	1716	1169
YBR137W	199	143	68	31	53	16	55	18	29	104	102	77	108	162	132
YBR138C	26	28	12	24	65	19	86	40	52	109	134	75	103	117	120
YBR139W	231	108	55	173	247	156	345	176	195	704	632	458	381	899	400
YBR140C	432	379	409	516	516	301	887	416	520	4406	3600	2885	3803	4859	3048
YBR141C	51	47	57	110	126	51	151	77	52	435	341	352	603	597	383
YBR141W-A	0	0	0	0	0	0	0	0	0	0	0	0	0	0	0
YBR142W	239	354	628	542	681	297	661	396	263	1645	981	1331	2066	1510	1069
YBR143C	535	595	746	593	1014	371	1147	553	433	1542	1057	1305	1944	1599	1298
YBR144C	7	13	12	2	2	0	11	2	2	22	13	22	21	27	15
YBR145W	51	65	53	39	50	34	74	38	46	148	133	124	196	298	147
YBR146W	104	61	75	469	698	298	569	306	255	534	452	505	467	548	355
YBR147W	355	265	152	118	180	85	207	151	141	295	179	189	106	193	111
YBR148W	71	39	55	32	60	23	61	31	30	202	182	159	145	116	138
YBR149W	295	156	89	252	381	195	323	132	192	615	487	417	496	946	520
YBR150C	239	142	214	216	301	123	311	150	155	984	780	775	991	1267	653
YBR151W	490	313	273	183	250	132	266	170	168	583	434	466	524	679	395
YBR152W	96	76	128	340	465	201	434	314	165	739	546	761	680	555	486
YBR153W	96	68	48	44	86	40	106	52	28	312	218	289	330	283	232
YBR154C	1115	825	1232	331	328	220	404	209	248	766	511	578	869	651	542
YBR155W	113	206	260	272	350	129	322	191	99	761	500	776	742	521	425
YBR156C	58	30	29	331	590	184	465	331	154	570	571	622	538	490	519
YBR157C	155	112	108	91	186	80	634	363	234	415	346	322	200	402	276
YBR158W	57	49	44	91	200	109	186	66	111	1189	1109	556	571	1143	375
YBR159W	403	307	193	109	143	48	152	68	83	462	481	389	443	574	579
YBR160W	122	77	85	220	339	141	270	158	181	458	372	417	524	371	404
YBR161W	93	67	46	89	197	54	126	75	50	268	257	247	167	281	252
YBR162C	62	68	67	107	173	91	236	133	134	890	928	660	687	774	641
YBR162W-A	621	480	1007	419	701	319	543	364	246	290	196	255	251	300	174
YBR163W	80	93	78	223	310	131	345	175	136	675	580	588	697	724	487
YBR164C	379	425	332	49	55	33	94	45	60	269	171	241	293	289	245
YBR165W	380	291	353	289	414	219	441	256	296	490	366	430	498	535	424
YBR166C	397	350	268	87	113	50	125	38	61	526	332	376	539	580	437
YBR167C	174	128	118	83	101	52	85	42	58	125	67	83	136	140	132
YBR168W	116	65	52	34	64	28	83	33	45	212	150	132	180	213	182
YBR169C	978	377	275	333	408	246	637	395	334	1558	1075	1000	966	1586	1434
YBR170C	116	89	79	107	132	66	148	79	64	798	531	593	642	699	479
YBR171W	226	244	295	277	482	192	459	258	141	577	451	597	634	564	435
YBR172C	512	299	498	770	1062	499	1326	821	558	2095	1468	1877	2012	1518	1308
YBR173C	251	195	243	566	849	391	434	199	306	337	257	272	431	373	299
YBR174C	6	7	7	11	22	4	12	3	4	34	28	27	24	34	32
YBR175W	132	135	113	36	56	26	61	28	30	277	176	192	241	270	208
YBR176W	59	54	56	30	47	14	46	19	22	139	105	122	147	210	133
YBR177C	266	152	134	174	249	143	239	138	116	651	429	576	806	1016	644
YBR178W	5	7	3	5	10	6	5	2	0	68	34	24	58	66	33
YBR179C	164	123	105	186	287	134	371	181	206	1087	766	780	918	949	778
YBR180W	19	10	28	29	49	19	90	50	33	164	119	163	177	140	148
YBR181C	3000	1272	1786	1032	1326	761	2119	885	1459	1843	1607	1863	2175	1720	1860
YBR182C-A	1	1	0	0	1	0	1	0	1	8	5	6	6	6	6
YBR182C	30	11	14	54	88	17	118	80	54	293	245	319	343	388	264
YBR183W	443	271	229	99	118	76	154	70	110	308	200	209	235	347	318
YBR184W	104	69	51	157	338	49	250	142	79	176	225	237	116	128	278
YBR185C	90	55	51	89	164	28	101	45	37	162	116	124	197	212	160
YBR186W	35	30	27	31	40	11	71	43	29	107	109	108	104	113	185
YBR187W	222	217	176	89	109	52	158	78	95	573	573	503	758	609	595
YBR188C	190	94	93	157	240	78	211	119	83	258	156	211	173	178	164
YBR189W	1163	649	800	1342	2175	849	2233	865	1538	2291	1989	1897	3860	2629	2764
YBR190W	1	2	7	12	21	4	16	8	1	44	25	37	49	28	40
YBR191W-A	0	0	0	0	0	0	0	0	0	0	0	0	0	0	0
YBR191W	581	381	275	396	582	298	733	246	466	1191	981	914	2055	1571	1774
YBR192W	436	249	351	113	186	74	209	98	104	605	350	486	496	485	380
YBR193C	148	87	89	256	402	175	408	239	195	379	260	305	280	334	261
YBR194W	85	46	58	172	313	111	250	152	90	157	98	157	155	145	119
YBR195C	76	66	76	211	326	129	419	218	171	494	420	420	701	595	564
YBR196C-A	1	0	0	0	0	0	0	1	1	1	2	3	3	2	3
YBR196C-B	0	0	0	2	5	0	2	1	1	3	3	2	2	4	8
YBR196C	739	458	369	396	473	291	1054	400	944	1511	1699	1227	2107	3249	2281
YBR197C	59	32	37	79	88	63	124	43	78	450	354	367	475	404	375
YBR198C	235	162	214	267	266	151	438	209	230	1809	1225	1624	1702	1492	1169
YBR199W	599	338	343	442	755	316	893	519	439	1385	977	1051	1100	1341	995
YBR200W-A	5	4	4	2	3	0	8	7	7	6	7	7	4	4	6
YBR200W	143	107	138	115	142	74	161	85	72	812	574	628	877	842	545
YBR201C-A	70	89	87	34	36	20	53	29	52	59	63	48	38	64	56
YBR201W	249	211	213	251	598	128	391	229	157	209	187	183	141	198	142
YBR202W	126	133	119	279	370	176	520	297	263	1373	1095	1237	1511	1217	1239
YBR203W	249	129	185	183	307	149	341	164	196	890	642	519	511	690	410
YBR204C	57	31	13	24	27	12	39	20	24	227	144	116	138	267	145
YBR205W	56	46	54	93	108	74	147	84	72	595	541	553	580	584	479
YBR206W	13	14	8	11	19	14	28	11	6	96	89	126	91	90	79
YBR207W	153	131	147	90	113	57	167	86	77	484	413	416	587	573	370
YBR208C	111	109	130	115	94	72	426	147	256	1744	2312	1890	4644	4543	6484
YBR209W	1	1	1	1	1	0	3	0	1	7	2	5	6	6	6
YBR210W	212	237	149	56	74	34	64	30	31	157	139	126	179	217	147
YBR211C	398	395	344	297	477	168	403	241	174	319	239	282	285	349	260
YBR212W	141	90	83	181	242	126	332	200	186	1172	980	854	652	826	509
YBR213W	20	17	23	37	44	26	74	37	24	255	194	249	221	231	174
YBR214W	248	137	90	56	78	60	121	43	72	364	342	279	371	634	425
YBR215W	256	153	201	413	631	264	559	349	222	942	734	806	803	713	624
YBR216C	158	90	78	134	207	75	225	113	125	636	511	477	520	641	539
YBR217W	180	167	175	108	157	52	153	58	60	181	110	127	125	156	116
YBR218C	239	152	156	471	535	311	780	444	454	2280	2411	2047	2219	2996	2287
YBR219C	7	8	6	3	0	5	10	7	5	26	22	14	49	45	28
YBR220C	25	22	23	21	17	10	41	18	19	316	268	214	464	489	324
YBR221C	162	91	82	356	523	311	632	394	277	850	780	808	673	945	603
YBR221W-A	1	0	0	0	0	0	0	0	0	0	0	0	0	0	1
YBR222C	190	148	246	59	50	39	162	76	122	1066	575	657	1424	1655	836
YBR223C	20	26	29	47	104	34	153	83	51	331	297	298	305	382	227
YBR223W-A	1	0	1	0	0	0	0	0	0	3	1	0	3	2	1
YBR224W	13	6	16	66	70	34	78	66	19	111	85	74	80	82	55
YBR225W	133	89	157	143	182	110	249	131	119	1048	764	765	853	987	633
YBR226C	19	19	12	1	5	0	12	7	4	23	13	14	30	42	32
YBR227C	238	147	151	140	215	79	227	140	110	556	399	613	481	432	360
YBR228W	182	160	141	66	86	45	125	59	50	454	254	418	325	301	228
YBR229C	192	132	120	379	593	282	592	359	310	1168	1131	885	697	1323	822
YBR230C	614	260	318	446	661	678	437	255	496	406	320	228	256	301	217
YBR230W-A	76	46	36	8	9	6	38	16	20	30	29	21	14	23	6
YBR231C	160	122	156	47	50	34	73	43	43	346	185	339	302	243	199
YBR232C	5	0	15	38	54	15	35	32	16	52	50	75	43	37	36
YBR233W-A	156	179	200	65	93	32	103	45	43	126	97	110	96	106	106
YBR233W	69	59	66	141	240	107	192	109	80	334	273	400	257	263	275
YBR234C	181	110	90	124	197	85	192	102	154	555	491	475	482	745	460
YBR235W	75	58	99	67	65	55	113	53	51	894	636	629	914	1032	690
YBR236C	279	142	190	265	464	145	397	258	177	504	403	438	514	578	391
YBR237W	221	150	240	220	274	123	360	233	155	949	607	799	781	786	638
YBR238C	137	164	219	354	355	224	355	190	179	1136	1029	963	1528	1319	957
YBR239C	92	64	102	194	272	166	341	156	110	721	594	669	692	614	478
YBR240C	17	12	40	39	34	23	62	35	39	199	207	179	190	315	183
YBR241C	70	32	30	34	32	43	67	25	49	313	268	186	152	344	204
YBR242W	505	368	472	248	351	154	292	158	183	467	328	487	487	415	335
YBR243C	108	81	85	77	103	34	128	52	71	607	531	497	662	574	538
YBR244W	128	110	99	16	48	31	22	6	12	138	58	70	121	137	80
YBR245C	645	469	608	947	1115	595	1389	839	652	2256	1776	2344	1908	1659	1592
YBR246W	59	75	64	164	313	142	260	192	74	455	322	436	560	508	358
YBR247C	284	268	567	1216	1888	875	1687	1074	579	1770	1228	1817	2108	1340	1067
YBR248C	123	84	102	295	488	206	533	394	240	1175	956	1297	816	760	637
YBR249C	178	149	171	355	498	260	490	238	346	797	769	671	1130	966	892
YBR250W	18	19	32	27	44	13	53	32	25	101	87	84	72	78	76
YBR251W	172	79	92	73	116	49	118	56	82	312	252	273	325	304	274
YBR252W	127	125	114	162	218	94	233	100	87	269	252	342	312	278	222
YBR253W	401	411	391	267	424	167	318	187	164	272	190	277	270	269	230
YBR254C	201	173	108	64	114	25	77	29	42	186	154	153	192	200	167
YBR255C-A	131	95	101	39	54	18	56	29	24	115	76	90	81	115	77
YBR255W	288	130	163	228	291	112	351	196	161	782	530	669	402	554	358
YBR256C	859	597	614	347	588	206	395	258	189	502	413	498	384	635	414
YBR257W	628	538	637	294	384	150	389	176	177	563	353	473	570	513	412
YBR258C	219	164	156	30	34	18	42	20	18	101	54	96	78	81	69
YBR259W	180	132	126	126	182	83	209	109	87	440	315	300	386	446	325
YBR260C	73	63	60	208	271	149	319	172	138	766	568	570	699	790	511
YBR261C	29	25	34	86	117	54	119	51	54	387	272	402	582	484	345
YBR262C	261	179	192	86	111	71	171	71	90	225	131	194	208	187	137
YBR263W	110	86	91	147	216	106	248	135	141	776	770	769	1065	908	802
YBR264C	75	39	42	19	36	13	61	32	29	154	100	149	160	154	130
YBR265W	70	64	60	69	102	41	147	60	73	426	376	357	573	505	482
YBR266C	38	4	39	275	788	181	533	480	104	90	58	30	40	0	0
YBR267W	177	225	371	564	658	409	783	481	364	1457	894	1489	1715	1145	977
YBR268W	232	188	194	134	175	61	142	84	92	125	84	130	167	146	115
YBR269C	292	126	93	342	477	271	515	272	335	376	248	315	207	257	214
YBR270C	76	75	53	31	36	15	64	21	29	331	215	228	323	296	217
YBR271W	59	82	131	116	166	61	162	99	80	478	306	405	563	401	309
YBR272C	106	67	48	121	156	79	170	87	72	358	250	321	255	361	279
YBR273C	212	160	180	359	603	206	544	337	232	697	474	668	592	687	412
YBR274W	118	103	104	82	86	40	123	50	44	337	200	242	356	423	278
YBR275C	368	184	207	690	889	247	1132	793	306	2370	1967	2632	1686	1729	1823
YBR276C	181	121	120	87	97	53	185	91	85	727	573	628	630	763	521
YBR277C	33	10	19	41	44	26	73	19	15	105	62	92	58	67	41
YBR278W	582	338	431	658	1195	327	761	472	340	384	282	395	333	322	313
YBR279W	736	521	702	920	1535	559	1208	763	542	1154	797	1073	897	891	685
YBR280C	132	68	48	19	32	19	72	35	35	355	300	229	165	411	199
YBR281C	101	57	94	129	161	60	254	149	98	566	432	602	461	509	469
YBR282W	288	149	207	134	247	92	186	119	94	183	135	176	189	168	147
YBR283C	275	242	184	228	272	181	407	209	250	1216	1099	1096	1471	1434	1161
YBR284W	48	29	42	37	48	26	63	25	22	214	154	148	132	364	146
YBR285W	259	183	97	64	113	55	54	25	52	61	41	38	37	68	41
YBR286W	1342	879	595	772	1044	718	1004	627	688	3040	2922	2434	3013	3604	2370
YBR287W	276	202	248	177	236	149	271	166	209	800	533	616	949	1119	654
YBR288C	180	165	175	320	679	174	519	311	180	503	362	459	560	535	454
YBR289W	300	137	246	521	847	356	842	478	419	1711	1660	1776	1535	1368	1360
YBR290W	1894	1039	2013	721	1079	587	1024	605	591	956	582	894	791	749	506
YBR291C	27	29	32	16	21	9	32	8	15	390	130	250	388	267	238
YBR292C	5	6	10	13	24	2	20	7	3	28	7	8	17	21	19
YBR293W	20	12	25	9	8	10	18	5	11	66	48	62	92	115	87
YBR294W	43	31	42	128	165	60	203	134	76	686	413	507	605	594	433
YBR295W	77	52	80	55	70	37	117	59	70	856	685	632	910	933	617
YBR296C-A	0	0	0	0	0	0	1	0	0	4	1	0	0	2	0
YBR296C	9	60	69	26	24	15	91	53	64	497	360	389	717	1036	214
YBR297W	28	25	30	18	61	22	49	12	23	238	205	143	118	234	103
YBR298C-A	0	1	0	0	0	1	0	0	0	4	5	0	1	2	1
YBR298C	113	82	118	40	52	20	79	50	30	230	169	203	145	216	192
YBR299W	2	3	8	0	0	12	28	0	5	50	39	37	34	28	0
YBR300C	0	0	2	0	7	0	0	0	7	8	4	12	3	8	5
YBR301W	0	1	3	4	0	4	3	0	0	2	5	8	5	2	3
YBR302C	532	353	317	134	159	78	162	86	95	270	210	187	277	393	230
YCL001W-A	4	7	2	14	40	9	28	15	4	18	16	23	27	27	25
YCL001W-B	11	12	12	11	25	5	15	4	3	12	16	9	21	13	22
YCL001W	604	520	516	235	323	169	289	168	149	433	424	479	393	432	405
YCL002C	206	227	185	93	117	39	109	47	73	416	275	293	328	352	230
YCL004W	47	37	40	67	97	48	108	55	32	349	274	265	344	365	238
YCL005W-A	19	17	22	44	55	19	67	21	34	108	98	108	138	152	133
YCL005W	54	41	38	111	227	58	163	70	64	239	208	197	256	253	179
YCL007C	21	18	20	49	47	16	57	37	19	118	84	97	111	125	70
YCL008C	73	50	59	75	89	60	123	58	80	392	392	406	292	447	270
YCL009C	98	73	67	115	140	83	128	74	88	579	656	569	835	914	730
YCL010C	77	48	42	101	125	55	171	91	62	566	446	651	481	532	421
YCL011C	568	404	527	150	138	117	279	131	155	1404	991	1435	1189	978	889
YCL012C	36	60	27	30	47	32	51	19	32	143	98	105	84	107	79
YCL014W	114	65	133	296	369	155	606	326	285	1694	1724	1745	1714	1487	1645
YCL016C	146	95	118	283	435	110	397	233	145	448	305	504	462	376	343
YCL017C	98	93	120	153	235	150	277	193	144	980	767	937	919	1011	720
YCL018W	0	0	0	0	0	0	0	0	0	1	0	0	0	0	0
YCL021W-A	13	8	3	19	17	10	18	11	14	27	17	13	30	37	22
YCL022C	88	41	10	96	179	38	122	59	17	86	67	115	20	15	44
YCL023C	1	1	1	9	5	2	11	4	5	58	45	57	40	68	32
YCL024W	268	193	153	305	326	142	392	236	143	1207	847	1293	974	1146	896
YCL025C	431	347	354	327	432	222	655	346	402	1708	1618	1439	2997	3082	2235
YCL026C-A	1	1	6	2	5	0	6	2	4	23	26	26	75	99	41
YCL026C-B	0	0	0	2	7	0	8	3	2	23	35	11	22	69	39
YCL027W	12	1	26	13	23	6	16	4	8	96	64	69	62	73	59
YCL028W	243	130	161	282	428	213	491	259	267	830	674	942	865	872	589
YCL029C	102	81	107	488	650	248	542	331	237	814	643	866	745	641	541
YCL030C	197	125	153	350	585	275	766	440	430	1362	1546	1285	1045	2475	1412
YCL031C	1007	868	1148	581	775	397	871	485	453	1209	794	981	1264	1128	820
YCL032W	181	74	109	164	236	86	218	135	136	378	288	344	322	298	290
YCL033C	165	115	59	64	78	34	79	26	42	80	51	52	61	103	59
YCL034W	213	139	88	107	147	77	185	108	118	517	436	467	489	501	443
YCL035C	1026	501	442	327	558	252	552	301	326	332	284	316	265	409	307
YCL036W	140	164	221	84	120	54	169	99	79	867	530	776	908	626	495
YCL037C	115	85	171	627	916	496	824	393	483	1936	1595	1820	2391	1550	1263
YCL038C	162	195	193	25	46	21	78	28	37	298	256	182	426	646	293
YCL039W	239	144	176	71	85	54	134	63	86	529	520	443	368	634	383
YCL040W	649	341	231	367	407	298	609	404	422	967	866	730	1098	2443	1379
YCL041C	16	16	21	30	53	16	64	27	15	341	265	175	323	342	159
YCL042W	204	122	139	117	141	114	160	70	159	159	119	80	191	294	188
YCL043C	438	404	455	807	1049	632	1153	655	650	2616	2483	2068	3099	3139	2097
YCL044C	73	51	87	91	158	107	180	111	66	410	328	344	407	384	226
YCL045C	208	159	203	238	321	173	372	172	233	1562	1376	1306	1665	1835	1302
YCL046W	7	7	16	16	24	26	29	14	30	180	126	91	151	159	84
YCL047C	70	89	89	111	194	59	173	86	60	133	104	137	118	146	116
YCL048W-A	44	59	15	1	1	5	4	0	0	17	9	7	9	6	8
YCL048W	23	24	48	11	13	10	21	2	11	31	16	39	15	10	21
YCL049C	163	125	108	325	481	218	450	235	170	604	427	445	562	797	465
YCL050C	270	223	236	875	1410	596	1341	566	473	738	605	690	743	768	604
YCL051W	279	225	254	399	597	277	593	357	310	833	714	850	814	845	651
YCL052C	241	124	105	112	176	78	178	73	124	398	311	307	319	476	293
YCL054W-A	0	0	0	0	0	0	0	0	0	0	0	0	0	0	0
YCL054W	724	1124	1995	1254	1441	608	1688	1127	633	3003	1793	3109	2899	2023	1618
YCL055W	358	346	323	207	350	119	293	131	131	293	174	264	261	295	225
YCL056C	359	319	275	35	25	21	65	28	30	171	91	176	119	109	101
YCL057C-A	43	43	29	14	16	13	30	12	33	139	76	82	146	186	114
YCL057W	208	108	82	158	181	111	244	129	143	856	708	605	581	1144	574
YCL058C	453	410	1037	518	564	331	597	417	245	442	218	540	361	251	203
YCL058W-A	0	0	0	0	0	0	0	0	0	0	0	0	0	0	0
YCL059C	631	597	1588	1548	2671	963	1923	1046	770	1326	749	1153	1481	1083	779
YCL061C	493	237	224	789	1069	269	1088	709	347	1553	1469	1792	1355	1468	1271
YCL063W	66	53	77	260	434	156	441	280	232	586	676	607	458	424	431
YCL064C	103	153	201	321	569	152	828	521	386	1270	1169	1175	1102	1131	1021
YCL065W	0	0	7	0	0	0	4	0	0	0	0	0	3	2	3
YCL066W	5	6	6	1	2	2	3	1	1	14	7	7	19	16	7
YCL067C	337	242	235	61	76	33	74	29	42	264	140	132	214	223	160
YCL068C	0	0	2	0	4	0	0	0	0	0	0	10	0	0	0
YCL069W	0	0	14	3	5	7	12	2	4	0	3	16	0	0	7
YCL073C	6	0	34	19	7	24	40	6	27	2	2	46	2	13	7
YCL076W	1	3	8	1	0	0	0	0	3	1	0	9	1	1	4
YCR001W	28	22	13	9	15	5	12	6	3	38	26	22	35	32	28
YCR002C	243	214	194	397	664	221	596	372	282	544	451	524	521	509	474
YCR003W	575	491	520	347	620	231	562	350	253	283	223	265	254	339	261
YCR004C	179	122	62	121	185	110	190	99	83	472	392	322	337	525	311
YCR005C	566	489	433	337	509	243	630	297	432	1018	800	792	2405	2071	1189
YCR006C	8	6	5	8	12	9	16	9	16	96	81	82	109	111	85
YCR007C	99	87	92	129	197	90	195	92	92	259	200	233	268	226	185
YCR008W	431	296	348	335	407	171	509	294	235	1569	1044	1327	1558	1292	1056
YCR009C	844	509	505	307	451	176	370	163	226	573	458	424	605	772	513
YCR010C	13	15	24	36	31	14	68	19	46	1040	936	539	147	294	240
YCR011C	669	342	379	410	663	286	723	498	387	1755	1354	1392	1117	1637	1162
YCR012W	203	158	55	317	404	191	652	244	503	1066	1318	760	758	2852	1401
YCR013C	210	187	63	210	213	187	508	220	360	182	237	213	158	266	195
YCR014C	611	389	516	150	259	83	304	206	114	770	548	749	494	506	446
YCR015C	183	151	117	84	102	38	137	66	65	265	196	220	253	284	201
YCR016W	793	811	1569	1187	1955	738	1308	673	490	1025	622	904	1015	760	522
YCR017C	386	346	401	192	190	111	333	174	220	1374	1259	1243	1428	1684	1220
YCR018C-A	279	285	333	32	62	21	71	21	60	114	111	92	148	317	145
YCR018C	52	66	56	31	40	16	92	36	37	115	110	104	192	220	92
YCR019W	99	61	71	63	94	41	109	49	74	306	215	278	326	284	283
YCR020C-A	64	92	75	17	16	13	23	11	13	76	46	51	70	79	53
YCR020C	101	98	118	66	86	38	97	49	64	210	141	139	340	310	168
YCR020W-B	381	411	714	385	655	220	374	239	196	150	110	167	162	172	161
YCR021C	290	285	142	181	218	78	246	156	152	402	400	363	418	806	970
YCR022C	2	2	6	3	7	12	8	7	2	19	30	17	27	18	16
YCR023C	226	137	125	225	326	157	336	182	203	726	675	698	715	847	693
YCR024C-A	31	43	32	31	41	24	47	18	21	59	48	41	72	80	56
YCR024C-B	192	209	164	36	43	18	68	23	36	122	125	85	222	182	171
YCR024C	85	45	75	150	216	87	228	142	98	447	362	403	400	376	238
YCR025C	11	5	9	2	4	3	8	2	2	50	34	47	50	49	31
YCR026C	300	178	217	228	256	129	401	232	207	1689	1347	1571	1754	1686	1296
YCR027C	80	49	70	68	53	19	72	36	38	239	155	216	319	281	225
YCR028C-A	323	360	270	109	157	62	211	76	134	249	254	235	264	327	291
YCR028C	67	100	104	84	111	71	134	95	70	783	540	635	806	707	494
YCR030C	238	142	109	177	293	146	363	160	193	928	863	729	657	1144	709
YCR031C	684	502	514	1107	1548	920	1942	788	1504	1523	1351	1321	2537	1879	2031
YCR032W	566	346	323	312	355	135	511	302	255	2552	1815	1771	2070	2676	1868
YCR033W	359	233	283	793	1016	478	1449	976	665	3128	2616	2823	3035	2743	2194
YCR034W	57	86	62	62	81	31	115	49	66	423	441	321	526	586	487
YCR035C	500	337	647	815	1146	491	989	525	422	1309	825	1271	1276	1019	768
YCR036W	533	352	339	288	446	142	428	265	132	545	330	465	390	484	311
YCR037C	147	88	123	232	282	140	343	214	170	922	703	799	899	1050	778
YCR038C	134	82	129	134	217	95	234	121	90	430	404	376	470	503	383
YCR038W-A	0	0	0	1	0	1	0	1	0	2	1	0	0	0	0
YCR039C	337	242	235	61	76	33	74	29	42	264	140	132	214	223	160
YCR040W	5	6	6	1	2	2	3	1	1	14	7	7	19	16	7
YCR041W	131	94	137	35	40	21	56	49	14	58	53	81	61	54	64
YCR042C	554	311	398	359	410	214	571	375	213	1957	1274	1715	1580	1537	1235
YCR043C	119	95	155	177	291	80	286	148	115	273	235	314	339	266	276
YCR044C	440	309	267	224	441	163	368	211	143	443	423	467	467	553	431
YCR045C	26	19	17	19	15	22	56	33	34	160	188	162	232	275	239
YCR045W-A	7	0	1	0	4	3	0	0	1	0	11	0	4	6	15
YCR046C	25	6	11	38	44	27	48	19	15	172	141	150	179	201	142
YCR047C	116	134	232	87	97	47	166	101	62	866	578	961	879	511	456
YCR047W-A	0	0	0	0	2	3	3	0	0	0	0	0	0	0	0
YCR048W	37	29	24	60	93	46	103	42	43	466	538	432	618	916	568
YCR049C	6	8	7	26	22	17	43	18	19	149	126	159	106	186	98
YCR050C	0	1	3	0	0	0	0	0	4	0	0	0	0	4	4
YCR051W	52	96	142	141	186	98	189	106	82	505	391	593	678	441	431
YCR052W	183	147	157	265	426	243	438	209	193	1156	992	1171	1193	1071	916
YCR053W	488	325	384	321	314	214	429	203	268	1175	1038	904	1774	1515	1326
YCR054C	139	143	120	172	239	101	269	171	115	542	364	453	608	566	485
YCR057C	149	221	322	653	807	441	840	526	371	2317	1683	2181	3197	2308	1779
YCR059C	35	34	31	90	121	63	115	56	51	268	192	222	332	313	252
YCR060W	267	231	225	106	159	57	113	69	72	219	151	181	228	195	179
YCR061W	112	58	47	51	50	38	58	30	44	462	327	263	334	533	283
YCR063W	13	17	16	35	40	27	80	31	29	341	214	302	380	305	243
YCR064C	6	4	6	30	23	27	22	20	16	68	42	49	66	61	49
YCR065W	151	109	79	152	189	111	264	148	174	841	801	766	1043	867	789
YCR066W	150	98	106	167	229	79	204	115	99	404	285	377	384	337	310
YCR067C	69	58	55	108	127	70	221	104	121	686	714	625	730	953	683
YCR068W	67	48	49	98	160	67	217	141	92	790	513	667	628	701	530
YCR069W	127	75	43	143	200	85	221	132	130	548	514	448	329	538	430
YCR071C	205	125	154	294	487	159	449	273	146	209	146	216	211	228	171
YCR072C	79	144	208	131	113	77	207	93	76	1142	713	965	1594	1142	779
YCR073C	55	72	105	165	223	92	295	138	127	1167	999	867	903	1168	635
YCR073W-A	66	55	40	34	39	31	65	24	39	196	166	189	224	256	188
YCR075C	21	16	7	7	21	6	25	2	4	50	73	44	74	96	82
YCR075W-A	38	27	14	5	14	6	18	4	18	13	11	14	20	22	15
YCR076C	286	192	154	73	89	35	95	68	45	277	190	215	199	259	180
YCR077C	461	357	340	216	237	130	292	136	177	1314	1240	1277	1446	1422	1107
YCR079W	183	73	69	47	57	44	83	37	72	334	312	261	283	351	248
YCR081C-A	2	3	4	4	1	0	3	0	1	38	14	7	11	10	5
YCR081W	105	58	75	329	502	182	532	317	211	1083	775	844	923	1096	765
YCR082W	444	499	535	188	293	142	240	136	147	326	205	276	309	370	216
YCR083W	139	130	125	370	453	236	425	191	209	257	144	217	173	200	117
YCR084C	292	236	300	505	719	440	776	429	477	2175	2167	2182	2379	2002	1756
YCR085W	4	3	8	3	3	2	5	3	0	9	14	11	8	11	5
YCR086W	26	19	20	45	78	21	69	39	38	127	125	104	145	156	140
YCR087C-A	0	0	0	0	0	0	0	0	0	0	0	0	0	0	0
YCR087W	414	452	869	573	856	258	497	250	258	839	487	875	1060	718	580
YCR088W	283	153	133	313	412	222	436	212	259	1254	1300	1091	919	1714	999
YCR089W	69	31	92	93	78	62	171	50	73	484	473	446	507	534	464
YCR090C	191	183	114	45	76	22	78	37	45	136	109	119	185	222	181
YCR091W	153	82	72	115	189	87	254	132	108	627	516	444	390	671	459
YCR092C	268	191	229	267	355	150	490	349	182	1247	836	1271	1131	1073	866
YCR093W	241	165	196	602	595	362	812	362	528	3991	3399	2926	4135	4207	3010
YCR094W	101	79	82	126	183	101	218	111	79	541	425	431	588	634	530
YCR095C	677	585	597	239	392	141	415	216	163	618	365	509	518	563	430
YCR095W-A	6	2	0	14	13	6	24	21	9	18	18	29	36	34	22
YCR096C	168	100	117	53	79	17	72	30	21	68	95	108	172	157	119
YCR097W-A	0	0	0	0	1	0	0	0	0	0	0	1	0	0	0
YCR097W	858	758	908	172	201	114	190	95	95	245	184	178	226	307	232
YCR098C	178	229	122	24	27	15	54	24	24	117	109	141	82	136	100
YCR099C	28	11	14	27	38	23	32	12	23	87	58	64	46	77	33
YCR100C	17	5	9	17	15	11	19	9	9	96	72	75	71	115	57
YCR101C	22	9	15	40	80	45	78	30	30	131	92	105	76	112	62
YCR102C	18	20	39	1	3	3	8	1	6	15	14	15	33	40	20
YCR102W-A	0	0	1	0	0	0	0	0	0	0	0	0	1	3	4
YCR104W	4	1	0	0	0	4	0	0	2	0	0	4	0	4	0
YCR105W	43	19	22	34	39	24	59	32	31	90	60	91	118	112	90
YCR106W	19	14	42	62	68	39	88	55	42	300	202	309	509	482	393
YCR107W	56	42	56	54	59	45	74	40	30	188	163	225	265	261	220
YCR108C	4	2	15	9	14	14	24	6	13	0	3	14	3	3	1
YDL001W	251	162	215	208	281	102	341	188	163	490	332	485	449	393	354
YDL002C	916	519	696	758	1181	471	1017	588	467	620	446	623	529	465	413
YDL003W	430	256	160	1125	2359	479	1423	892	477	1035	1091	1443	884	1092	1092
YDL004W	367	186	108	124	167	84	219	103	110	390	292	301	207	372	265
YDL005C	334	234	376	916	1671	739	1116	577	440	800	584	726	619	600	484
YDL006W	223	124	177	178	311	95	242	174	126	341	206	310	300	301	256
YDL007C-A	1	0	1	0	1	1	1	0	0	0	0	0	0	1	1
YDL007W	1814	1277	1914	525	735	398	831	444	442	1356	953	1166	1213	1161	778
YDL008W	170	150	92	74	139	48	130	56	55	229	212	230	248	271	201
YDL009C	101	69	88	18	29	4	38	9	19	53	40	62	60	60	50
YDL010W	462	237	429	445	812	230	755	442	270	626	439	645	550	526	451
YDL011C	18	0	11	21	33	16	26	11	20	43	17	50	51	60	41
YDL012C	79	66	81	150	250	121	170	81	119	197	149	159	244	237	197
YDL013W	173	114	136	246	323	132	490	304	204	1427	904	1389	1260	1065	767
YDL014W	331	452	567	296	325	214	397	168	296	1675	1271	1359	2399	1561	1310
YDL015C	229	246	150	106	137	65	159	73	83	636	510	410	664	805	543
YDL016C	22	21	15	2	5	0	5	3	2	17	27	20	31	34	28
YDL017W	98	57	63	85	138	63	173	135	73	422	270	434	385	329	290
YDL018C	601	408	215	338	609	166	361	207	196	491	399	499	322	463	492
YDL019C	406	182	156	404	605	288	692	355	326	1643	1400	1233	975	2085	1149
YDL020C	378	282	424	451	558	279	592	252	356	1435	1098	1090	1367	1668	933
YDL021W	371	158	87	103	144	73	233	132	130	212	203	168	99	362	218
YDL022C-A	0	0	1	5	4	4	3	5	2	5	8	4	10	7	9
YDL022W	375	218	116	134	190	130	387	122	263	1118	888	752	661	876	810
YDL023C	45	24	8	15	27	17	45	10	14	415	241	190	203	196	164
YDL024C	28	23	28	23	33	24	45	14	24	238	126	116	181	198	125
YDL025C	210	146	142	127	204	93	275	147	114	837	625	649	738	891	607
YDL025W-A	0	1	0	0	0	0	0	0	0	1	1	0	0	1	3
YDL026W	28	7	9	5	7	3	11	4	3	49	38	22	19	62	28
YDL027C	229	176	112	67	112	46	101	42	77	248	195	136	164	337	186
YDL028C	167	121	131	179	251	103	294	153	164	922	825	818	889	836	749
YDL029W	201	140	85	239	354	130	344	229	231	596	543	451	601	1016	612
YDL030W	154	142	188	219	376	123	346	261	128	587	414	501	571	464	418
YDL031W	262	365	705	985	1043	476	982	547	458	3148	1939	2669	3545	2636	1677
YDL032W	3	2	1	11	10	5	14	5	1	70	48	37	58	61	37
YDL033C	37	25	28	104	123	67	155	99	57	547	435	483	697	635	576
YDL034W	2	3	1	0	2	0	1	0	0	21	14	8	45	36	36
YDL035C	364	206	266	415	532	248	675	336	318	1875	1408	1542	1695	1816	1417
YDL036C	71	79	90	240	263	139	339	179	132	613	399	561	683	670	505
YDL037C	43	30	37	56	32	23	73	20	50	317	321	172	511	550	317
YDL039C	143	124	118	298	223	144	241	104	125	971	805	688	1190	1208	748
YDL040C	219	180	169	871	1227	655	1289	860	573	2022	1612	1806	1894	2105	1536
YDL041W	28	21	34	101	96	64	141	96	84	82	80	107	79	50	44
YDL042C	124	127	116	112	117	58	148	84	80	778	522	550	850	722	566
YDL043C	220	148	155	118	170	59	173	68	63	340	207	268	306	272	255
YDL044C	289	168	203	328	575	159	560	295	208	641	449	617	546	542	503
YDL045C	218	141	138	120	183	71	170	103	87	411	283	309	331	373	289
YDL045W-A	125	81	104	170	228	85	165	75	82	194	127	183	186	203	146
YDL046W	184	107	120	102	141	81	124	59	93	311	275	249	439	380	307
YDL047W	65	60	50	65	64	28	96	44	33	645	528	454	685	682	531
YDL048C	740	425	397	412	310	205	517	178	299	2458	1724	1562	1909	1747	1865
YDL049C	100	83	149	161	183	55	227	70	91	383	418	272	409	653	231
YDL050C	90	162	254	65	66	28	51	53	35	78	44	75	117	109	77
YDL051W	414	430	647	659	832	361	738	324	336	1084	784	1032	1197	1012	863
YDL052C	51	51	58	49	74	41	105	30	56	372	431	304	441	584	436
YDL053C	277	249	377	625	1460	378	912	568	263	793	614	701	717	674	520
YDL054C	58	40	58	54	61	26	75	27	39	362	293	203	368	432	268
YDL055C	437	549	295	481	699	342	927	389	762	2123	2188	1335	2016	2746	1835
YDL056W	464	351	432	478	755	283	815	484	327	1347	1135	1205	1151	1213	1005
YDL057W	77	70	44	40	64	23	73	51	54	213	157	197	167	203	189
YDL058W	1171	549	732	1789	2609	827	2878	1852	1028	2955	2465	3024	2016	2717	2007
YDL059C	127	88	90	87	142	50	162	102	58	167	101	170	120	127	124
YDL060W	261	299	399	650	898	463	972	621	430	2444	1475	2158	2450	1579	1334
YDL061C	330	261	457	481	815	451	1071	483	561	487	356	452	665	473	435
YDL062W	25	18	42	274	335	189	286	198	117	126	89	140	115	110	97
YDL063C	159	265	400	256	358	135	357	182	168	1436	843	931	1571	1334	961
YDL064W	161	155	159	84	137	48	130	71	68	292	232	316	392	340	280
YDL065C	1719	876	1237	574	887	287	976	576	452	805	504	819	437	374	376
YDL066W	275	172	109	132	243	113	246	120	148	687	645	595	712	1122	537
YDL067C	283	181	187	28	39	23	47	20	34	108	56	71	98	83	75
YDL068W	50	39	35	47	100	34	146	76	34	70	57	74	38	61	50
YDL069C	140	111	105	157	260	89	130	128	87	66	47	56	98	96	73
YDL070W	718	700	960	489	609	298	756	458	288	1715	1251	1191	1661	1660	1325
YDL071C	17	16	19	34	26	31	60	31	19	132	104	135	128	92	79
YDL072C	428	308	184	305	513	200	356	170	183	418	373	328	360	579	357
YDL073W	305	197	237	291	435	168	457	252	236	998	602	806	867	831	667
YDL074C	1017	738	1196	1330	2189	773	1952	1128	880	2299	1653	1992	2290	1973	1654
YDL075W	2264	996	1536	1020	1993	693	2180	1321	1230	914	892	935	1786	1230	1487
YDL076C	359	188	257	139	223	101	231	149	150	474	345	409	381	419	330
YDL077C	117	78	63	161	252	106	341	197	158	792	605	609	586	681	568
YDL078C	870	602	489	338	453	256	571	335	272	998	799	780	538	861	570
YDL079C	451	389	358	138	219	115	270	117	149	475	444	373	361	442	361
YDL080C	75	54	62	96	130	35	212	122	87	751	654	645	769	768	621
YDL081C	892	600	605	329	413	345	717	286	667	788	725	756	1188	956	1022
YDL082W	770	492	539	648	984	513	1163	546	775	1831	1374	1245	2553	1878	1787
YDL083C	446	322	204	217	274	132	321	105	233	327	310	295	731	591	661
YDL084W	914	759	768	609	997	370	1061	409	545	1592	1305	1238	1576	1662	1376
YDL085C-A	393	329	320	407	1127	224	755	400	197	143	122	183	92	172	108
YDL085W	75	26	38	38	42	25	146	50	95	983	888	520	101	393	276
YDL086C-A	0	0	0	0	0	0	0	0	0	0	0	0	0	0	0
YDL086W	121	85	58	74	94	58	156	61	64	412	315	349	316	426	283
YDL087C	42	28	34	62	56	37	91	47	41	420	268	372	436	403	290
YDL088C	202	153	163	467	786	352	650	384	331	907	702	730	916	843	657
YDL089W	154	91	51	87	103	37	109	43	56	347	237	229	324	363	286
YDL090C	137	72	61	115	169	72	174	99	84	324	268	290	239	308	231
YDL091C	354	208	155	371	676	227	623	338	319	574	460	464	312	522	369
YDL092W	736	412	668	315	543	203	427	246	203	370	290	381	475	365	350
YDL093W	75	58	33	38	44	29	70	47	55	540	569	470	445	626	586
YDL094C	5	5	2	2	4	2	6	3	6	35	28	24	30	23	26
YDL095W	434	286	315	360	369	211	623	431	346	1999	1975	1740	1790	1996	1735
YDL096C	14	6	13	120	87	106	134	86	105	30	27	31	30	29	34
YDL097C	422	386	249	261	330	157	278	109	171	735	625	500	790	864	594
YDL098C	222	225	220	75	135	40	150	62	53	295	203	237	253	254	174
YDL099W	866	483	973	810	1191	479	1018	614	469	676	475	670	377	401	317
YDL100C	581	408	604	1510	3370	966	2184	1052	762	992	910	913	990	1072	804
YDL101C	188	87	59	213	368	81	256	111	115	399	403	412	375	439	428
YDL102W	187	167	166	394	513	170	592	341	245	1257	859	1262	1189	1071	886
YDL103C	224	142	85	100	180	68	156	75	76	507	396	444	516	578	483
YDL104C	102	63	50	60	76	32	106	35	50	188	145	189	171	207	174
YDL105W	86	60	57	290	424	143	334	185	117	375	290	337	367	330	317
YDL106C	229	148	167	454	745	305	683	408	316	827	695	815	673	721	569
YDL107W	202	123	99	67	123	45	141	67	65	240	140	188	149	205	144
YDL108W	109	65	71	130	166	82	169	89	89	340	274	355	397	339	316
YDL109C	55	20	36	58	64	42	114	63	56	447	360	396	379	382	327
YDL110C	444	213	185	256	429	231	344	189	213	404	266	309	234	339	230
YDL111C	88	83	84	187	220	122	171	99	117	439	335	356	610	574	456
YDL112W	271	431	617	450	565	264	636	415	314	2232	1618	2127	2557	2252	1541
YDL113C	311	253	223	200	342	138	358	228	189	853	608	513	599	902	502
YDL114W-A	2	0	1	3	2	0	0	2	1	5	3	3	3	2	1
YDL114W	10	1	8	10	14	2	20	8	7	27	22	36	30	23	18
YDL115C	913	487	630	109	191	94	205	115	123	591	375	546	441	443	343
YDL116W	301	229	244	193	272	93	283	136	175	927	700	748	1016	1079	792
YDL117W	75	72	108	454	789	334	762	460	315	1436	1116	1190	1157	1057	773
YDL118W	55	15	23	33	28	19	55	27	41	52	37	57	31	36	34
YDL119C	50	27	20	14	34	8	33	18	13	89	62	52	93	134	56
YDL120W	38	32	30	42	64	31	66	32	36	76	70	62	138	163	146
YDL121C	416	546	725	1246	3341	510	1696	924	369	519	378	543	477	500	368
YDL122W	589	417	867	1564	2125	826	2057	1302	960	3180	2104	2843	3377	2633	2092
YDL123W	32	18	22	23	32	23	45	34	11	199	146	142	173	155	121
YDL124W	1017	516	260	575	739	587	551	391	468	918	503	449	734	1166	713
YDL125C	138	115	52	54	65	35	83	19	47	126	112	100	205	284	205
YDL126C	1566	989	919	1207	1486	1011	1665	1062	1217	3608	2864	2858	3145	3673	2240
YDL127W	101	54	36	143	180	90	242	145	85	440	435	445	494	436	351
YDL128W	208	212	155	142	202	141	228	102	165	849	766	681	1045	1211	844
YDL129W	92	91	121	100	148	67	157	81	75	530	386	486	660	553	471
YDL130W-A	432	200	186	191	227	130	222	132	167	170	108	92	64	144	98
YDL130W	265	218	168	248	414	232	513	186	359	638	590	553	1339	909	1106
YDL131W	293	207	277	557	993	415	1069	640	522	1615	1070	1506	1229	1128	1011
YDL132W	757	441	317	533	829	304	762	457	326	1570	1150	1118	807	1255	847
YDL133C-A	0	0	0	0	0	0	0	0	0	0	0	0	0	0	0
YDL133W	538	304	342	195	325	118	326	207	176	869	665	749	692	720	569
YDL134C	612	336	480	435	594	291	640	316	437	858	706	734	1092	1016	768
YDL135C	409	215	141	47	73	19	83	33	49	326	241	216	201	261	202
YDL136W	1695	1222	1633	638	1061	422	1092	444	704	670	537	622	1345	961	1006
YDL137W	735	549	341	132	153	85	232	115	129	626	489	402	602	684	543
YDL138W	80	54	107	125	128	65	229	99	129	1062	805	858	1151	1314	835
YDL139C	96	53	69	264	450	128	280	172	138	261	214	321	220	202	199
YDL140C	510	381	508	612	599	381	960	508	700	4381	3892	3882	5174	5115	3838
YDL141W	51	48	38	91	105	64	170	89	100	603	618	548	623	745	612
YDL142C	226	109	89	65	85	50	81	66	42	155	125	102	106	178	109
YDL143W	323	305	384	438	592	362	692	416	385	1659	1199	1549	1863	1400	1128
YDL144C	150	81	84	80	115	86	163	98	89	520	359	497	305	329	263
YDL145C	444	254	289	562	667	386	1074	601	798	3102	2860	2834	3169	3440	2800
YDL146W	55	59	62	48	82	41	94	36	39	284	202	180	282	392	238
YDL147W	1811	1360	1760	1287	2088	883	1789	945	895	1649	1138	1308	1414	1425	991
YDL148C	941	1014	2269	2087	2896	1196	2607	1628	1175	3215	1821	3165	3035	2183	1603
YDL149W	128	75	123	271	431	167	460	308	241	940	759	641	485	878	427
YDL150W	320	303	450	391	498	267	470	336	230	1233	776	1155	1359	901	777
YDL151C	12	3	9	63	117	55	151	100	13	208	131	298	161	105	78
YDL152W	28	36	55	15	8	3	39	20	2	75	37	78	34	23	20
YDL153C	1305	1726	3522	494	572	228	658	437	273	1277	600	1377	885	643	518
YDL154W	153	72	114	118	174	59	258	160	100	462	371	545	362	356	349
YDL155W	168	124	134	622	1036	335	890	591	432	1029	853	1114	1015	863	828
YDL156W	47	28	33	132	167	46	217	137	79	776	583	906	594	554	509
YDL157C	152	180	125	48	105	37	96	36	52	154	104	95	126	195	129
YDL158C	65	58	88	49	69	19	70	44	31	44	24	32	44	41	26
YDL159C-B	0	0	0	0	0	0	0	0	0	0	0	0	0	0	0
YDL159W-A	0	0	0	0	0	0	0	0	0	1	0	0	0	0	0
YDL159W	40	26	58	98	188	65	210	128	61	455	316	388	420	460	281
YDL160C-A	16	21	16	5	5	3	11	6	6	17	10	4	30	32	23
YDL160C	259	157	179	308	421	202	474	220	390	1159	838	828	1135	1158	821
YDL161W	693	294	525	719	1120	393	980	515	443	1033	747	1171	736	683	560
YDL162C	6	1	5	2	5	0	3	6	1	19	9	20	11	14	12
YDL163W	0	0	0	0	0	1	0	0	0	7	3	0	2	7	4
YDL164C	206	142	76	126	127	34	185	112	89	824	675	936	594	854	679
YDL165W	163	112	116	95	144	58	122	54	85	241	192	199	260	317	254
YDL166C	272	296	413	148	165	72	208	103	105	296	200	273	382	290	280
YDL167C	285	476	677	550	670	311	811	466	319	1813	1229	1737	1874	1469	1093
YDL168W	69	77	77	66	87	34	110	55	57	408	205	314	354	341	232
YDL169C	58	42	35	53	56	44	94	44	47	133	110	94	49	82	32
YDL170W	42	29	41	77	112	41	91	37	45	327	312	241	312	382	276
YDL171C	521	296	339	835	945	514	1419	733	931	4070	3947	3941	5027	6593	4997
YDL172C	201	178	219	97	140	62	155	88	90	88	75	205	139	110	102
YDL173W	113	92	76	135	159	111	207	96	111	562	457	391	527	599	338
YDL174C	606	410	424	389	368	228	651	298	421	1644	1217	1281	2182	1754	1197
YDL175C	101	89	114	139	215	67	219	150	94	419	319	427	460	426	346
YDL176W	428	291	348	236	284	137	396	245	174	823	622	726	760	803	633
YDL177C	132	113	153	184	332	124	310	162	118	134	116	150	145	140	89
YDL178W	508	433	505	269	320	162	469	241	231	913	605	842	741	744	589
YDL179W	26	34	41	74	179	52	155	85	85	285	287	173	141	210	92
YDL180W	252	124	151	83	102	50	133	69	99	627	442	434	542	553	420
YDL181W	837	344	238	189	234	149	234	117	194	179	106	130	67	88	94
YDL182W	111	71	104	325	434	244	714	249	400	2115	695	1480	1208	958	601
YDL183C	50	18	30	45	45	14	79	44	40	289	158	197	186	190	153
YDL184C	0	0	0	0	0	0	0	0	0	0	0	0	0	0	0
YDL185C-A	67	40	42	91	106	71	162	101	75	303	256	181	270	287	191
YDL185W	1093	848	697	760	879	595	1439	803	984	3603	3612	3165	3877	5599	3557
YDL186W	16	13	21	30	70	18	57	30	23	47	51	56	61	58	68
YDL187C	6	5	2	9	11	3	7	7	3	10	17	12	16	13	15
YDL188C	435	225	169	248	361	206	367	213	232	650	480	480	388	673	404
YDL189W	244	203	244	183	211	83	278	178	121	848	662	803	784	792	598
YDL190C	575	273	293	459	685	248	768	401	383	1499	1258	1167	1389	1624	1179
YDL191W	1898	1220	1283	944	1571	618	1338	633	852	994	901	810	1695	1295	1316
YDL192W	675	573	596	344	466	192	549	212	299	1074	876	821	1406	1245	1063
YDL193W	126	106	63	166	289	169	305	171	141	512	427	359	495	567	442
YDL194W	74	41	69	69	102	45	163	74	81	589	563	442	428	562	429
YDL195W	448	261	225	379	387	239	723	312	432	2584	2529	2309	2427	3261	2297
YDL196W	11	4	8	17	18	17	34	20	19	35	41	55	37	33	38
YDL197C	181	94	90	288	401	144	369	207	159	970	845	1013	602	687	647
YDL198C	21	23	17	16	32	16	50	28	24	157	138	138	173	214	170
YDL199C	66	28	51	27	37	28	60	21	28	282	278	199	207	400	176
YDL200C	540	417	355	136	137	76	178	83	84	238	151	151	115	171	107
YDL201W	93	116	208	260	303	142	316	187	205	640	479	588	796	546	457
YDL202W	90	67	62	116	174	84	218	124	94	409	310	383	378	362	265
YDL203C	70	55	69	81	101	59	131	77	64	775	483	619	798	783	477
YDL204W	861	378	184	431	577	369	529	253	341	806	716	438	280	710	686
YDL205C	283	177	239	174	224	87	241	108	114	742	523	729	676	684	501
YDL206W	206	156	179	92	137	67	189	87	87	541	348	387	366	597	353
YDL207W	171	125	135	503	859	268	717	554	257	746	527	657	614	563	474
YDL208W	149	173	362	483	745	248	620	284	256	725	567	710	1029	746	590
YDL209C	93	83	135	95	138	44	147	78	44	710	407	638	518	389	283
YDL210W	23	15	33	16	17	18	38	12	13	123	81	114	352	369	93
YDL211C	89	72	83	180	266	94	263	130	121	367	299	384	325	298	220
YDL212W	567	813	794	214	327	136	249	130	166	744	612	606	945	885	697
YDL213C	239	320	741	508	587	329	551	319	261	776	434	703	762	530	361
YDL214C	27	29	39	47	54	30	74	35	33	279	239	242	293	317	224
YDL215C	206	185	192	140	175	73	241	112	148	1159	1005	684	972	1457	792
YDL216C	250	128	91	149	248	72	259	139	90	274	203	274	190	245	196
YDL217C	22	16	19	13	10	6	20	8	6	161	100	107	191	153	117
YDL218W	13	8	11	17	21	20	53	22	22	122	108	105	94	112	84
YDL219W	235	186	130	124	190	64	137	69	56	178	105	159	136	178	133
YDL220C	35	23	43	78	74	52	149	72	77	918	742	739	625	679	540
YDL221W	33	19	18	11	34	5	41	20	8	121	98	120	82	80	76
YDL222C	204	101	29	14	12	12	39	14	21	158	130	73	58	96	96
YDL223C	868	310	176	307	308	244	757	502	352	2933	2588	1725	716	933	1022
YDL224C	57	52	47	75	58	39	97	48	53	558	517	378	628	643	512
YDL225W	358	271	418	299	390	149	463	279	232	1122	745	1006	959	917	683
YDL226C	152	100	123	187	254	106	287	164	117	555	526	684	581	672	486
YDL227C	4	6	26	6	11	9	21	5	4	73	42	55	81	62	44
YDL228C	329	221	267	196	248	160	399	234	333	489	381	402	892	556	612
YDL229W	155	144	114	307	343	239	560	210	470	2060	1824	1538	3690	2486	2388
YDL230W	120	70	63	88	120	56	136	84	72	204	126	173	137	206	140
YDL231C	147	117	154	163	150	86	213	107	116	1308	929	952	1586	1709	1031
YDL232W	5	7	6	1	1	1	3	3	1	4	6	8	16	8	5
YDL233W	64	49	41	107	140	57	136	68	65	413	293	330	456	514	357
YDL234C	328	242	239	171	248	128	335	166	197	880	669	691	883	1217	623
YDL235C	130	107	109	102	168	62	135	67	46	216	144	158	265	260	196
YDL236W	339	299	222	91	111	62	121	82	76	433	323	382	528	577	471
YDL237W	98	76	37	76	110	47	109	36	53	488	362	295	472	620	435
YDL238C	38	17	19	25	48	21	57	27	31	294	229	184	217	355	201
YDL239C	291	167	117	106	145	62	142	79	75	463	289	274	192	498	226
YDL240C-A	1	0	1	1	1	1	1	0	0	2	1	3	2	1	1
YDL240W	40	25	36	221	352	103	340	193	126	775	749	622	688	795	661
YDL241W	1	1	2	9	9	5	19	8	6	36	26	21	37	46	33
YDL242W	4	2	0	3	7	4	10	1	2	20	15	17	6	24	17
YDL243C	44	30	37	38	73	33	74	53	24	132	94	144	114	113	114
YDL244W	3	3	11	5	14	13	19	8	12	33	13	24	5	10	15
YDL245C	57	20	65	49	46	17	96	30	46	264	183	216	143	130	131
YDL246C	3	5	0	3	5	0	20	3	9	0	0	14	27	0	0
YDL247W-A	0	0	0	0	0	0	0	0	0	0	0	0	0	0	0
YDL247W	0	30	31	0	0	0	129	71	0	292	153	271	215	255	204
YDL248W	138	103	106	74	84	39	100	56	69	276	183	193	317	442	238
YDR001C	589	297	231	275	299	209	471	238	253	1787	1046	1096	1452	1997	1214
YDR002W	1863	1599	2667	1421	2200	989	1629	739	927	1262	882	1101	1467	1313	931
YDR003W-A	10	9	13	2	1	2	2	1	0	22	13	17	23	30	21
YDR003W	149	99	68	115	182	96	185	113	114	502	370	412	404	394	352
YDR004W	370	251	304	170	296	108	334	176	107	568	411	513	420	510	344
YDR005C	564	450	374	100	141	32	142	60	82	400	301	265	446	502	356
YDR006C	307	208	273	331	323	176	372	155	200	2029	1481	1523	2428	2126	1268
YDR007W	146	105	100	193	292	101	252	126	93	411	306	373	347	398	237
YDR008C	190	129	153	89	108	92	112	58	70	76	52	87	70	93	52
YDR009W	34	15	20	25	33	18	48	15	21	245	195	175	290	339	189
YDR010C	1	1	5	6	2	4	6	5	4	18	14	16	10	15	16
YDR011W	498	343	573	659	695	445	831	432	467	4498	2928	3401	5757	5262	3533
YDR012W	476	319	238	246	313	140	491	179	366	1049	987	893	1910	1592	1555
YDR013W	146	136	71	44	65	11	51	21	44	215	173	141	261	313	243
YDR014W-A	6	1	8	25	43	15	38	24	13	19	25	33	17	22	15
YDR014W	341	183	174	325	421	109	394	217	143	592	520	560	578	725	444
YDR015C	0	0	0	0	11	0	2	3	1	0	0	0	0	0	0
YDR016C	97	64	33	31	49	22	51	31	49	22	35	19	20	37	47
YDR017C	370	333	477	704	804	422	1046	590	539	2516	2137	2271	2594	2446	1715
YDR018C	94	53	36	18	39	21	56	26	28	166	131	112	100	133	92
YDR019C	55	48	82	157	361	124	473	300	256	671	893	872	521	822	863
YDR020C	117	127	154	162	246	84	238	141	94	365	253	332	347	290	241
YDR021W	151	200	325	479	689	303	548	301	231	839	461	715	1018	737	550
YDR022C	153	68	91	483	861	319	664	448	299	218	157	177	187	167	181
YDR023W	985	620	729	722	974	438	1010	534	597	1629	1247	1229	1896	1734	1409
YDR024W	8	4	7	1	6	7	19	8	4	55	32	37	44	36	27
YDR025W	654	371	523	709	1573	1104	1712	885	868	1239	1049	1437	1786	1350	1492
YDR026C	326	181	384	622	866	288	914	572	345	1423	929	1362	1280	1051	858
YDR027C	403	230	259	249	395	163	476	269	235	1184	1003	1030	873	1009	841
YDR028C	485	273	283	943	1266	577	1453	942	739	3482	2704	2849	3180	3422	2481
YDR029W	50	32	24	86	91	43	95	62	52	232	163	133	220	202	150
YDR030C	175	105	72	35	41	19	67	31	27	328	225	242	207	217	188
YDR031W	284	285	159	52	84	34	76	32	43	73	47	38	31	86	57
YDR032C	141	76	34	19	23	12	55	15	31	112	100	60	63	205	76
YDR033W	642	473	502	897	1131	647	1722	732	934	2073	1808	1604	2732	2072	2047
YDR034C-A	219	253	255	57	57	40	95	49	77	87	64	61	101	174	126
YDR034C	302	232	269	509	661	290	680	379	303	1498	1077	1241	1649	1445	1218
YDR034W-B	54	36	11	7	10	3	5	1	3	27	11	8	10	25	12
YDR035W	204	219	250	419	594	343	396	179	241	990	701	821	1152	1252	669
YDR036C	74	43	69	102	136	66	143	66	111	536	377	368	513	675	388
YDR037W	735	650	903	685	847	447	1094	518	815	2939	2193	2427	3289	3003	2271
YDR038C	72	65	111	139	234	69	302	160	201	1184	1200	1217	1683	1976	1018
YDR039C	136	217	408	283	183	248	466	283	298	1937	1444	1555	2347	1512	1543
YDR040C	357	269	275	263	387	207	383	155	221	1718	1316	1500	2115	2325	1308
YDR041W	297	251	190	129	167	75	194	100	129	392	240	289	335	364	301
YDR042C	73	97	127	109	134	52	138	69	39	165	91	155	156	101	102
YDR043C	812	422	518	620	1234	378	1095	773	417	673	480	532	720	735	617
YDR044W	43	46	71	343	436	152	613	282	339	604	994	708	568	1327	1134
YDR045C	252	326	423	229	327	118	288	157	116	289	164	302	285	257	204
YDR046C	456	275	286	286	402	187	437	246	176	896	787	753	1119	1255	1158
YDR047W	140	99	60	62	80	41	121	58	50	373	289	351	411	419	343
YDR048C	12	5	6	4	6	4	12	4	5	71	44	45	54	51	26
YDR049W	274	198	314	408	634	202	639	436	238	1256	832	1133	1084	903	738
YDR050C	414	422	348	468	459	320	740	256	675	1267	1042	654	1276	1843	1130
YDR051C	1279	997	1158	313	366	195	498	229	256	742	430	788	553	567	472
YDR052C	453	289	419	1396	2194	800	1756	1187	665	1999	1448	1988	1517	1401	1145
YDR053W	1	7	1	2	4	1	4	0	0	33	7	35	17	19	25
YDR054C	213	151	187	636	934	315	664	391	349	1107	775	957	1237	1088	835
YDR055W	181	147	107	53	72	45	185	65	109	648	386	256	844	1518	513
YDR056C	615	520	1064	907	1781	552	1407	670	678	813	724	833	823	983	625
YDR057W	443	278	324	232	340	130	364	211	183	838	648	717	573	706	520
YDR058C	460	310	214	52	89	32	108	47	66	230	157	172	245	270	188
YDR059C	26	31	19	8	16	6	14	8	6	110	62	42	89	95	64
YDR060W	598	952	1799	2214	2594	1239	2669	1639	1125	4331	2947	4118	4473	3316	2545
YDR061W	207	130	161	262	463	117	567	356	228	991	700	849	870	906	645
YDR062W	264	220	234	324	397	197	521	257	323	1691	1354	1412	1787	1575	1494
YDR063W	634	229	249	261	425	172	439	269	220	125	132	134	79	113	127
YDR064W	1222	779	745	703	932	463	1345	570	960	1570	1251	1075	3070	2328	2529
YDR065W	127	76	70	91	145	39	155	74	59	485	381	385	457	528	318
YDR066C	88	81	37	18	32	13	32	14	16	75	68	60	117	131	127
YDR067C	268	187	217	331	603	227	462	335	282	244	191	207	263	261	239
YDR068W	1271	740	865	304	441	157	499	262	255	510	372	427	273	328	279
YDR069C	117	76	76	141	217	78	201	99	95	615	438	360	415	634	352
YDR070C	581	236	203	281	312	214	550	396	350	240	198	160	61	126	138
YDR071C	522	476	429	449	715	273	676	386	333	495	390	469	415	510	419
YDR072C	251	227	265	160	187	95	273	119	162	1249	1031	939	1609	1688	1064
YDR073W	134	111	165	235	401	196	304	143	165	278	241	253	330	354	278
YDR074W	1038	573	350	417	684	438	813	460	561	1869	1458	1221	1708	2610	1761
YDR075W	141	157	188	105	90	61	112	59	47	440	242	374	524	388	276
YDR076W	79	69	50	82	103	36	131	67	46	296	280	297	278	335	271
YDR077W	6612	3827	4772	1521	2192	2136	4124	1767	2661	9756	8616	7049	12161	8929	6456
YDR078C	156	170	206	120	193	62	137	76	51	206	137	155	188	208	154
YDR079C-A	118	147	129	44	61	35	47	33	42	92	56	74	75	74	53
YDR079W	392	238	296	80	83	55	86	48	42	173	94	93	146	143	89
YDR080W	422	333	339	182	273	118	286	199	165	794	531	704	556	650	500
YDR081C	191	137	222	266	305	142	371	194	172	1128	831	850	1151	1093	774
YDR082W	183	109	117	89	108	41	136	52	57	418	309	331	365	408	326
YDR083W	395	577	1038	846	1069	412	986	527	368	1450	797	1276	1386	968	732
YDR084C	131	72	63	115	212	99	235	128	120	165	169	151	177	224	169
YDR085C	179	99	73	107	216	89	230	145	93	425	368	308	248	547	285
YDR086C	362	319	326	215	287	130	348	150	139	353	249	317	356	365	312
YDR087C	431	648	1331	886	1531	620	1264	865	452	963	705	1081	1150	854	647
YDR088C	745	340	602	338	418	157	427	220	202	824	481	677	656	563	432
YDR089W	69	44	85	96	194	49	313	170	213	586	633	515	511	621	648
YDR090C	77	38	68	72	106	52	122	42	59	432	331	329	547	527	335
YDR091C	119	139	147	435	478	208	515	223	272	1392	963	1052	1825	1482	1311
YDR092W	118	83	88	219	367	245	314	143	239	192	168	176	309	270	249
YDR093W	224	143	210	577	667	376	952	563	451	3911	3566	3682	4224	3870	3083
YDR094W	51	43	29	21	22	24	50	23	30	30	34	35	68	53	56
YDR095C	3	2	4	0	2	3	6	1	0	11	24	16	19	28	8
YDR096W	245	138	173	162	270	142	267	104	133	878	813	480	614	830	512
YDR097C	421	322	184	659	753	279	847	579	340	1892	1497	2363	1499	1669	1349
YDR098C	255	180	217	218	338	161	258	174	138	335	250	301	429	395	324
YDR099W	644	365	331	643	1272	551	1011	488	504	1123	931	856	937	1079	798
YDR100W	103	66	27	19	30	14	34	14	16	111	125	67	76	158	106
YDR101C	162	294	434	301	312	133	374	220	206	1430	913	1246	2106	1554	1139
YDR102C	8	10	5	3	5	4	6	1	3	37	24	20	29	30	29
YDR103W	84	51	81	74	59	39	95	40	38	380	282	379	421	392	359
YDR104C	197	142	181	265	370	140	459	304	189	1367	949	1147	1148	1062	730
YDR105C	87	66	58	53	72	37	94	55	54	410	333	283	453	616	443
YDR106W	14	13	31	25	59	15	49	15	12	64	50	54	56	60	62
YDR107C	110	76	55	189	345	99	289	149	100	442	404	381	317	435	335
YDR108W	147	106	171	365	564	238	475	263	239	469	426	491	408	445	362
YDR109C	171	71	117	119	153	78	221	141	121	510	385	477	407	458	394
YDR110W	403	385	420	211	273	110	324	207	107	982	590	808	832	797	644
YDR111C	116	73	62	84	73	36	93	53	47	517	347	386	631	511	436
YDR112W	30	13	21	36	52	36	48	28	18	134	95	97	128	112	77
YDR113C	160	96	91	620	1170	328	886	685	327	684	664	855	666	518	670
YDR114C	37	33	31	81	137	35	88	69	28	25	17	26	25	21	25
YDR115W	223	197	240	140	229	69	182	110	103	181	159	180	245	265	203
YDR116C	136	102	127	591	1043	405	870	457	345	608	418	566	472	555	355
YDR117C	220	149	169	199	296	111	285	141	184	688	496	523	677	677	489
YDR118W-A	9	2	3	0	0	1	4	0	1	9	7	5	9	6	1
YDR118W	211	127	136	115	206	53	238	122	79	437	339	354	353	450	345
YDR119W-A	990	360	296	175	337	240	211	143	179	144	126	89	74	132	95
YDR119W	418	314	256	380	456	231	514	295	323	1813	1428	1648	1872	1756	1444
YDR120C	184	179	285	182	194	121	267	143	112	1246	776	1096	1305	966	771
YDR121W	165	108	253	602	997	337	775	431	376	548	378	621	593	443	406
YDR122W	312	188	189	269	405	225	534	259	289	2005	1477	1468	1487	2029	1224
YDR123C	49	47	129	354	535	212	491	323	185	569	476	533	712	805	401
YDR124W	26	15	42	43	31	11	42	13	22	170	137	141	173	234	114
YDR125C	123	86	66	58	58	28	79	28	35	252	170	136	209	265	154
YDR126W	66	76	123	164	198	75	159	62	90	353	291	309	447	441	294
YDR127W	228	147	171	401	410	266	576	250	360	2224	2154	1981	2507	3914	2323
YDR128W	220	184	202	204	172	106	354	160	146	1519	1125	1272	1330	1457	924
YDR129C	519	383	367	303	422	259	518	250	323	1532	1181	1342	1823	2190	1296
YDR130C	146	62	85	187	297	90	245	171	127	412	333	416	416	405	378
YDR131C	124	69	62	58	73	34	93	52	56	240	158	159	255	259	234
YDR132C	78	58	82	104	118	41	138	70	62	360	288	243	412	401	302
YDR133C	222	173	158	171	341	222	237	115	235	103	130	72	204	265	255
YDR135C	340	264	224	351	439	224	604	317	343	3335	2853	2547	3233	3703	2641
YDR136C	16	9	16	27	24	17	34	22	16	56	48	50	42	58	46
YDR137W	465	241	197	155	300	77	307	174	105	736	512	641	601	653	577
YDR138W	224	148	186	507	791	282	811	529	309	1258	869	1153	1076	975	771
YDR139C	500	328	508	79	113	80	113	67	71	114	100	101	120	146	96
YDR140W	93	70	92	157	230	105	217	130	120	380	311	362	387	355	304
YDR141C	276	178	167	400	503	234	715	423	359	2126	1800	1713	1852	2583	1660
YDR142C	95	66	63	57	77	29	86	41	42	320	227	253	340	377	255
YDR143C	115	100	148	368	479	258	575	315	250	1322	1056	1253	1496	1165	990
YDR144C	55	53	51	95	141	62	171	95	106	582	498	540	531	562	587
YDR145W	461	292	400	857	1336	560	1052	522	490	1570	1189	1459	1478	1327	954
YDR146C	17	29	52	154	325	112	403	187	221	336	655	384	514	357	352
YDR147W	132	139	178	133	174	69	198	110	124	527	477	439	605	657	499
YDR148C	229	136	83	120	181	93	239	132	161	672	500	370	373	717	463
YDR149C	12	5	11	177	247	156	307	181	98	526	378	442	274	245	186
YDR150W	425	228	286	961	1175	582	1461	823	810	5454	5095	3701	3576	4567	3529
YDR151C	125	94	116	271	557	164	407	234	220	445	315	395	436	412	302
YDR152W	651	635	1088	978	1609	678	1229	683	568	1159	752	1163	1036	803	691
YDR153C	315	182	307	685	1019	455	914	638	384	1439	1044	1462	1323	1089	827
YDR154C	69	45	27	77	115	39	66	29	32	64	59	47	65	133	58
YDR155C	327	203	95	275	336	237	357	157	289	501	397	294	336	636	334
YDR156W	28	44	46	51	66	52	49	26	27	210	141	183	319	241	208
YDR157W	1	3	9	1	3	1	4	1	0	56	31	18	15	21	10
YDR158W	195	147	118	613	1041	542	790	385	357	543	430	424	315	546	331
YDR159W	263	171	255	578	790	315	801	459	375	1891	1479	1503	1513	1677	1138
YDR160W	185	194	209	186	214	122	332	225	181	989	715	892	871	897	620
YDR161W	95	140	175	150	227	83	227	122	81	774	482	736	962	694	501
YDR162C	511	345	469	682	1334	460	934	620	362	483	362	570	323	294	267
YDR163W	899	539	904	255	429	154	368	251	150	268	150	269	162	139	109
YDR164C	113	62	67	95	135	78	190	84	72	587	402	491	544	657	463
YDR165W	208	243	323	347	447	207	443	221	229	1082	737	853	1377	1076	805
YDR166C	100	82	68	180	276	115	288	163	147	989	844	713	1085	1253	892
YDR167W	690	580	702	283	355	141	306	122	146	422	265	381	344	365	231
YDR168W	1030	772	802	521	879	348	827	567	408	857	609	719	651	796	599
YDR169C-A	0	0	0	0	0	0	0	0	0	4	1	2	6	6	3
YDR169C	262	168	185	289	389	201	413	226	223	931	789	840	870	969	691
YDR170C	792	531	590	1353	2018	942	2290	1450	1078	3963	3606	3563	3741	4446	3050
YDR171W	673	333	262	438	707	330	677	390	401	1040	725	721	641	1059	924
YDR172W	739	592	764	982	1382	824	1481	915	760	3457	2484	3045	3722	2922	2215
YDR173C	202	112	94	72	140	54	161	88	90	313	234	251	148	266	186
YDR174W	201	185	177	324	402	218	418	196	234	1053	808	783	1118	1008	934
YDR175C	239	117	155	250	395	136	416	245	213	554	420	526	480	511	411
YDR176W	498	285	338	562	849	272	875	539	363	1229	1034	1178	922	997	825
YDR177W	1131	763	1000	503	852	254	695	326	287	559	383	508	477	480	399
YDR178W	62	44	24	14	20	14	37	19	37	90	69	42	56	95	70
YDR179C	168	242	249	180	347	48	336	182	45	206	146	180	135	180	161
YDR179W-A	152	158	98	60	93	31	90	57	50	213	181	168	305	305	286
YDR180W	176	156	166	441	568	170	567	348	184	1358	1100	1213	1425	1279	1124
YDR181C	288	163	155	291	496	131	402	216	177	569	426	502	372	392	313
YDR182W-A	3	2	4	0	1	1	1	0	0	15	6	14	16	10	7
YDR182W	230	157	172	250	455	194	389	304	189	791	715	693	777	815	646
YDR183C-A	46	60	87	13	15	7	17	5	13	26	23	29	51	54	32
YDR183W	361	248	287	222	259	114	227	107	111	227	176	229	209	172	188
YDR184C	354	427	881	949	1448	511	1075	599	410	1066	641	943	1064	890	595
YDR185C	119	106	107	65	116	48	121	69	52	244	130	206	296	252	212
YDR186C	493	330	553	782	969	364	1322	753	746	2733	2500	2515	2473	3061	1918
YDR187C	28	16	28	9	12	9	13	13	10	137	65	75	101	73	32
YDR188W	203	197	205	193	205	104	254	132	174	1498	1094	1337	1897	1612	1283
YDR189W	385	247	262	368	487	228	580	277	309	1018	855	940	878	1007	786
YDR190C	657	768	1014	821	1115	497	1037	563	589	2137	1463	2136	2165	1775	1468
YDR191W	91	101	74	33	24	12	65	18	18	277	171	192	349	318	251
YDR192C	63	35	41	64	84	47	104	53	75	360	287	349	420	388	292
YDR193W	8	3	6	18	6	8	17	14	10	45	39	39	53	46	45
YDR194C	958	873	1170	1259	1686	829	1417	662	744	2230	1528	1814	2229	2223	1336
YDR194W-A	0	1	0	0	1	0	3	1	0	4	0	0	0	1	0
YDR195W	111	100	155	143	179	70	215	112	78	537	330	343	630	491	376
YDR196C	892	606	400	118	167	92	165	79	146	267	205	205	170	281	203
YDR197W	116	97	98	68	116	63	118	51	52	296	208	197	287	292	212
YDR198C	120	118	159	131	169	78	207	121	100	542	365	514	514	495	371
YDR199W	169	105	143	124	146	62	124	82	44	67	45	72	43	47	35
YDR200C	255	169	195	234	406	100	409	221	120	573	447	523	421	516	419
YDR201W	373	241	295	268	482	132	378	225	165	191	144	238	128	162	168
YDR202C	185	98	77	64	132	37	112	47	54	226	147	135	141	266	174
YDR203W	9	5	4	11	13	9	23	6	10	51	22	22	32	39	38
YDR204W	159	78	35	188	269	125	239	144	139	405	334	296	212	550	279
YDR205W	63	48	50	80	110	57	159	72	67	540	414	419	563	603	467
YDR206W	158	124	125	181	214	104	292	137	185	1241	934	1046	1410	1299	1021
YDR207C	192	116	186	445	653	176	667	312	218	1048	819	901	1123	1007	738
YDR208W	403	239	236	442	695	356	742	412	381	1476	1290	1209	1645	1584	1320
YDR209C	105	93	41	65	114	36	77	18	34	96	77	76	162	242	171
YDR210W	14	8	18	5	17	7	17	9	39	23	20	7	13	12	6
YDR211W	436	429	620	546	730	299	731	346	375	2049	1352	1710	2061	1778	1382
YDR212W	374	322	382	641	1052	443	852	540	388	1576	1153	1365	1791	1575	1223
YDR213W	95	78	161	668	806	286	1030	575	432	1355	1178	1592	1837	2154	1239
YDR214W	184	94	102	373	610	311	594	305	260	585	564	568	450	820	525
YDR215C	1	3	1	1	8	0	6	2	5	33	30	19	41	59	57
YDR216W	94	116	95	104	113	69	243	103	140	1383	1240	808	1254	1369	816
YDR217C	219	158	248	594	743	249	914	628	315	2070	1478	1929	1857	1587	1238
YDR218C	33	10	19	25	51	11	49	35	12	69	76	76	47	44	52
YDR219C	158	102	95	197	320	98	292	142	118	640	458	458	621	597	511
YDR220C	1	0	4	1	4	2	3	1	0	4	8	9	4	5	5
YDR221W	148	95	95	318	462	197	545	319	213	1233	1046	1137	1014	1087	1002
YDR222W	141	80	63	370	513	164	455	223	213	680	393	585	621	588	478
YDR223W	66	44	85	120	174	45	193	116	99	426	288	254	289	349	226
YDR224C	265	212	151	204	525	136	361	160	236	256	390	229	468	369	544
YDR225W	985	655	632	1124	2447	883	2529	1471	1015	1167	1401	1373	1288	1196	1666
YDR226W	227	117	116	635	988	457	1051	556	616	685	686	622	696	854	714
YDR227W	228	178	219	457	711	271	774	454	306	1776	1458	1503	1728	1573	1372
YDR228C	358	242	262	431	618	309	652	321	237	962	659	722	652	646	561
YDR229W	231	140	101	212	351	149	399	279	167	651	515	633	331	478	397
YDR230W	65	32	13	22	37	8	36	14	15	45	45	41	40	67	49
YDR231C	79	43	25	19	15	22	24	16	17	171	132	93	94	203	128
YDR232W	282	228	302	394	392	252	583	272	329	1443	1174	1382	2018	1800	1347
YDR233C	386	302	346	487	535	383	724	299	447	1605	1500	1112	2019	1886	1478
YDR234W	85	94	128	149	184	93	253	130	142	1361	759	1181	1361	900	941
YDR235W	352	288	289	146	262	91	248	125	101	498	341	374	533	635	429
YDR236C	312	215	206	153	245	84	236	141	88	264	179	271	206	257	182
YDR237W	152	131	115	73	85	35	86	49	63	280	214	243	264	348	254
YDR238C	251	219	169	511	667	297	821	424	517	2151	1936	1781	2097	2528	1883
YDR239C	106	61	105	201	254	109	311	154	163	947	772	807	974	1006	767
YDR240C	155	117	170	461	649	257	521	273	239	639	451	558	665	673	420
YDR241W	31	43	36	32	43	29	61	32	29	53	39	48	39	50	44
YDR242W	84	46	45	51	48	32	66	37	35	423	306	284	584	600	406
YDR243C	168	127	140	235	367	120	329	253	111	693	497	662	630	544	416
YDR244W	202	114	170	364	532	251	545	349	262	869	614	734	716	733	521
YDR245W	290	313	427	427	623	249	650	398	285	1362	1136	1263	1420	1159	1010
YDR246W-A	4	4	2	20	24	17	28	15	14	26	16	23	23	16	19
YDR246W	93	67	81	297	567	213	437	230	118	410	342	416	356	329	315
YDR247W	170	83	62	71	91	33	103	52	67	381	297	237	416	452	599
YDR248C	239	174	123	50	83	33	85	41	28	107	69	77	96	177	105
YDR249C	73	61	58	42	53	29	59	38	31	207	136	118	290	279	230
YDR250C	1	0	1	4	0	1	5	2	0	7	8	10	4	2	10
YDR251W	303	152	172	280	428	200	475	225	247	1031	856	898	896	1265	900
YDR252W	32	15	17	43	69	26	65	23	20	101	85	85	81	87	103
YDR253C	100	66	51	58	162	25	111	52	28	50	39	50	31	34	38
YDR254W	151	95	78	36	73	15	66	32	34	213	180	154	167	275	241
YDR255C	160	82	86	174	295	114	304	175	157	410	290	256	192	406	228
YDR256C	49	62	75	30	29	22	51	32	37	479	428	280	326	313	274
YDR257C	165	142	206	173	205	105	174	92	94	794	418	642	783	626	525
YDR258C	444	261	176	384	610	264	776	377	355	1175	821	766	779	1617	1181
YDR259C	60	58	103	85	189	46	116	85	30	163	94	116	118	119	86
YDR260C	64	66	87	94	158	64	137	92	54	286	176	262	302	239	226
YDR261C	66	52	50	157	237	107	290	143	146	499	689	563	450	666	641
YDR262W	106	114	75	61	73	43	99	46	48	589	451	424	686	718	440
YDR263C	25	20	9	17	26	6	24	29	9	211	167	173	210	221	207
YDR264C	182	126	119	188	280	99	344	197	184	1413	1174	1108	1536	1469	1029
YDR265W	66	68	48	46	74	24	108	44	50	320	277	240	296	373	254
YDR266C	216	147	194	193	186	92	292	164	196	1043	736	863	1294	1248	897
YDR267C	189	188	189	122	169	83	202	109	95	386	261	408	365	290	266
YDR268W	23	18	19	21	40	6	47	22	20	199	136	142	182	244	163
YDR269C	0	0	6	1	1	2	12	0	0	48	25	46	25	22	15
YDR270W	72	43	55	82	122	92	195	109	111	891	688	663	874	820	488
YDR271C	30	19	23	10	19	8	28	12	9	16	22	13	23	15	23
YDR272W	906	700	485	165	175	100	263	123	134	642	440	520	435	628	470
YDR273W	77	42	68	52	85	24	110	75	32	220	142	199	147	140	114
YDR274C	10	54	135	67	86	11	115	56	42	158	142	203	154	153	61
YDR275W	666	537	847	395	425	201	452	286	178	755	474	655	638	709	505
YDR276C	217	152	143	48	62	38	71	38	62	179	137	130	218	239	189
YDR277C	203	168	148	144	279	146	327	148	215	508	457	431	520	573	594
YDR278C	185	114	385	2242	3527	6188	13525	4744	14768	271	287	414	330	146	216
YDR279W	89	68	59	35	60	24	49	33	26	228	172	175	262	265	223
YDR280W	451	435	635	466	980	267	772	510	206	739	468	667	751	604	473
YDR281C	837	739	722	171	194	92	398	298	177	90	61	76	138	104	69
YDR282C	243	129	107	58	79	25	90	59	50	301	161	220	215	234	180
YDR283C	191	135	249	335	387	169	511	311	244	2011	1499	1591	2003	2010	1421
YDR284C	303	154	110	99	150	80	153	63	92	272	294	231	253	375	289
YDR285W	372	313	467	452	789	194	590	374	183	541	374	450	373	393	305
YDR286C	96	70	40	22	45	11	36	18	16	43	39	45	49	63	69
YDR287W	71	38	36	35	62	38	91	38	48	272	216	232	189	203	181
YDR288W	678	508	598	185	259	100	252	149	123	448	241	323	414	418	290
YDR289C	650	403	530	291	432	165	423	234	197	773	492	688	517	525	438
YDR290W	17	11	12	10	8	2	15	4	4	55	23	32	34	36	27
YDR291W	189	129	193	400	523	209	602	409	248	1635	1107	1320	1552	1558	1132
YDR292C	219	171	212	225	301	125	332	194	164	1014	837	855	1042	1066	783
YDR293C	419	254	300	454	580	334	779	457	458	2710	2072	1866	2678	3505	2086
YDR294C	368	235	320	444	693	344	716	465	354	1398	1088	1180	1461	1598	1355
YDR295C	121	72	69	225	386	109	282	160	107	644	518	550	731	729	614
YDR296W	110	66	58	91	154	42	133	82	64	401	306	346	433	402	356
YDR297W	145	176	235	314	364	168	413	197	197	796	1068	783	1171	1205	1143
YDR298C	154	89	43	76	92	44	146	75	79	322	278	230	264	310	262
YDR299W	575	487	1032	959	1526	483	1320	715	460	1625	951	1547	1588	1128	828
YDR300C	134	134	156	200	266	84	318	150	165	785	536	668	943	854	702
YDR301W	222	191	242	338	422	201	553	330	286	1800	1364	1669	1514	1651	1148
YDR302W	280	292	282	66	88	55	115	52	61	222	198	186	221	253	194
YDR303C	362	349	360	239	324	162	392	217	195	1079	828	730	1126	1224	997
YDR304C	697	458	335	422	647	299	527	285	280	766	673	639	706	798	621
YDR305C	160	129	109	49	88	23	96	47	43	187	146	131	142	146	118
YDR306C	266	153	139	85	154	63	140	64	80	395	297	307	385	494	315
YDR307W	335	176	119	127	249	60	212	118	91	569	462	461	439	593	448
YDR308C	383	303	297	359	529	225	448	235	187	247	191	275	238	228	218
YDR309C	90	43	49	94	161	62	150	61	75	330	360	375	651	544	503
YDR310C	216	172	244	426	508	212	676	387	297	1960	1589	1888	1888	1606	1372
YDR311W	649	450	578	527	936	316	903	552	355	810	567	795	837	758	687
YDR312W	309	466	806	579	812	276	688	423	303	1050	585	923	1022	786	583
YDR313C	131	103	145	225	331	160	354	163	212	414	308	334	317	343	261
YDR314C	53	31	45	145	188	67	215	121	82	613	450	486	639	746	649
YDR315C	163	137	64	34	49	22	47	19	14	144	112	83	92	146	68
YDR316W	621	320	444	190	221	88	293	174	123	477	313	452	272	257	171
YDR317W	74	51	58	64	90	28	103	45	42	240	171	229	205	187	132
YDR318W	412	289	214	269	633	132	486	319	145	341	295	351	256	257	264
YDR319C	80	47	36	11	20	5	29	10	16	87	73	62	122	136	119
YDR320C-A	93	142	92	21	33	17	31	16	31	57	61	29	59	75	75
YDR320C	98	79	83	152	162	91	257	134	99	811	606	694	637	747	532
YDR320W-B	0	0	0	2	0	0	1	0	1	1	0	0	0	0	1
YDR321W	106	115	154	208	299	153	276	133	146	658	498	608	963	804	633
YDR322C-A	1141	872	812	116	157	81	145	68	90	152	80	97	123	134	96
YDR322W	63	47	46	75	76	38	101	60	75	250	182	196	364	341	250
YDR323C	328	154	149	338	592	135	438	257	142	413	305	371	324	417	346
YDR324C	487	624	935	838	1112	516	1233	791	462	2267	1440	1993	2554	2001	1632
YDR325W	203	168	267	479	759	225	879	506	273	1506	1009	1415	1350	1151	1082
YDR326C	250	247	324	594	754	301	890	498	393	2631	2730	2269	3203	3640	2737
YDR327W	113	126	75	47	71	19	54	22	31	85	50	79	104	128	83
YDR328C	948	926	870	331	491	298	455	193	306	614	479	490	672	762	536
YDR329C	432	221	224	381	599	216	519	266	280	675	569	563	473	618	448
YDR330W	209	125	102	180	278	150	308	138	195	578	487	442	385	500	318
YDR331W	85	90	78	153	174	61	154	72	80	510	409	324	662	589	501
YDR332W	127	89	84	184	293	102	293	137	130	720	547	602	684	711	524
YDR333C	272	175	187	288	395	181	459	282	216	1233	848	1011	1313	1247	890
YDR334W	471	300	492	1133	1261	584	1383	772	686	3377	2323	2786	3015	2792	1915
YDR335W	538	331	390	341	417	195	509	324	296	1467	1148	1052	1154	1498	1097
YDR336W	475	441	458	102	148	59	153	73	92	408	227	291	304	342	301
YDR337W	217	185	228	277	419	140	365	189	160	524	370	438	377	455	296
YDR338C	172	156	210	227	321	131	378	206	195	1029	795	879	992	1042	793
YDR339C	236	224	357	378	627	273	435	252	266	245	178	224	392	357	264
YDR340W	43	40	71	15	26	5	42	21	23	49	41	33	49	64	46
YDR341C	209	162	233	349	452	169	461	200	296	1523	998	1178	1839	1446	1316
YDR342C	2189	784	1066	698	1534	787	1453	803	844	502	803	461	671	952	962
YDR343C	70	186	122	233	0	112	368	268	162	251	161	92	168	543	193
YDR344C	4	0	8	17	19	7	8	12	9	104	103	133	131	153	111
YDR345C	621	481	408	228	241	154	493	164	505	1753	1848	1416	2713	2498	2683
YDR346C	516	498	1274	823	1305	464	1344	890	532	1664	1294	1685	1755	1449	1093
YDR347W	69	38	67	58	81	48	82	40	41	318	295	303	393	424	274
YDR348C	316	205	263	394	558	219	668	461	272	1176	1013	1188	932	958	793
YDR349C	104	132	150	148	205	99	220	143	130	1045	791	867	1328	1285	895
YDR350C	311	244	247	342	496	210	544	310	241	958	669	780	755	848	610
YDR351W	303	240	305	551	754	314	819	476	400	1806	1209	1476	1705	1545	1147
YDR352W	71	44	68	71	107	45	128	63	66	391	326	250	426	458	369
YDR353W	309	242	262	413	623	277	577	253	295	1082	773	903	1060	1164	737
YDR354C-A	0	0	0	0	0	0	0	0	0	0	0	0	0	0	0
YDR354W	140	108	136	209	324	153	264	130	128	416	409	412	377	491	389
YDR355C	4	1	1	64	91	28	104	49	29	69	55	83	61	52	57
YDR356W	849	456	420	1561	2957	630	2454	1597	702	1679	1566	1900	1069	1163	1366
YDR357C	344	268	177	42	60	24	77	30	46	142	121	94	109	177	128
YDR358W	482	200	182	320	586	238	530	331	326	561	479	395	263	734	364
YDR359C	245	101	125	324	402	190	548	253	198	1719	1392	1579	1574	1373	1296
YDR360W	3	1	2	11	7	4	8	6	6	95	91	81	95	96	73
YDR361C	205	233	466	632	1001	373	744	430	308	834	571	761	853	745	537
YDR362C	211	123	141	120	203	63	218	98	110	745	525	676	811	688	569
YDR363W-A	784	566	786	545	1164	300	890	462	297	362	222	327	244	269	181
YDR363W	109	74	90	273	375	147	398	236	144	629	430	529	585	502	399
YDR364C	161	102	139	106	142	76	186	96	103	586	337	445	585	528	315
YDR365C	553	627	1311	1652	2246	1004	2074	1402	951	2952	1890	2967	2829	1942	1451
YDR366C	115	131	163	48	49	24	92	33	65	187	185	114	265	490	199
YDR367W	63	53	29	37	50	19	38	22	27	142	171	111	221	244	224
YDR368W	245	125	70	100	152	94	149	84	109	289	272	259	225	491	243
YDR369C	219	114	72	149	224	68	252	160	83	558	380	442	360	443	346
YDR370C	366	290	302	96	153	51	142	87	96	445	276	317	506	479	357
YDR371C-A	0	0	0	0	0	0	0	0	0	0	0	0	0	0	0
YDR371W	264	161	136	69	148	45	175	97	67	251	187	216	216	283	177
YDR372C	1012	814	1015	520	892	287	690	422	422	838	575	723	866	823	603
YDR373W	469	465	330	41	77	34	81	43	52	204	110	149	243	262	190
YDR374C	26	25	21	19	26	12	23	12	10	25	13	21	24	24	29
YDR374W-A	316	261	211	58	64	49	78	50	60	54	43	36	54	110	62
YDR375C	105	50	53	94	179	71	219	104	67	428	308	363	355	446	273
YDR376W	146	80	61	65	82	34	115	68	85	402	289	278	264	394	228
YDR377W	479	404	361	209	322	148	458	193	162	382	271	348	276	389	274
YDR378C	389	389	382	140	284	134	225	130	152	269	202	213	246	296	219
YDR379C-A	211	152	124	32	43	21	87	53	38	96	65	70	35	93	45
YDR379W	390	234	304	519	672	306	806	388	420	1495	1115	1294	1254	1433	914
YDR380W	332	213	348	288	514	219	766	497	412	1027	712	752	913	1315	716
YDR381C-A	373	295	213	49	63	21	67	28	25	134	84	105	114	156	126
YDR381W	743	581	727	721	1112	419	821	389	400	1062	963	1049	1390	1381	962
YDR382W	632	436	379	409	465	412	918	355	822	771	688	742	1489	1064	1206
YDR383C	737	397	347	408	793	185	558	309	186	312	284	335	269	313	292
YDR384C	22	31	41	24	31	14	50	22	23	488	328	413	714	449	367
YDR385W	681	473	426	1047	1209	863	2252	934	2170	3077	2829	2669	5334	4533	4182
YDR386W	226	155	161	341	645	158	411	282	175	545	383	427	505	434	388
YDR387C	130	84	68	106	126	66	207	103	85	478	355	372	417	506	424
YDR388W	342	172	191	456	701	345	723	487	321	1035	821	887	783	1003	739
YDR389W	228	175	135	444	556	261	593	356	304	1289	1111	1092	1666	1480	1115
YDR390C	159	175	218	202	296	106	239	131	113	607	436	493	564	513	434
YDR391C	220	120	117	355	518	261	442	233	232	304	154	233	265	394	198
YDR392W	274	164	158	89	159	46	154	71	67	487	286	406	372	368	322
YDR393W	371	188	185	418	616	232	564	324	255	752	565	654	578	668	533
YDR394W	408	352	361	608	1009	486	908	469	504	1076	861	965	981	1047	736
YDR395W	376	311	387	499	537	291	780	473	512	2292	1741	1953	2702	2332	2022
YDR396W	198	123	184	154	241	89	250	97	101	355	264	313	376	326	279
YDR397C	45	23	22	16	13	8	24	9	12	110	49	56	74	87	58
YDR398W	472	532	1118	490	508	360	670	358	294	1827	1328	1779	2295	1653	1239
YDR399W	659	941	946	323	464	166	509	219	352	794	709	738	1188	953	920
YDR400W	77	95	69	39	53	14	83	19	39	296	264	269	363	397	267
YDR401W	2	2	2	4	2	2	11	1	0	0	15	13	5	18	13
YDR402C	8	3	7	10	14	27	30	15	15	98	63	74	106	125	56
YDR403W	51	37	36	13	24	16	27	15	13	140	77	94	153	160	109
YDR404C	74	57	61	98	167	70	135	71	72	248	158	194	278	266	229
YDR405W	171	123	133	180	279	116	306	158	105	634	495	652	550	535	405
YDR406W-A	2	1	2	0	0	0	0	0	0	0	1	0	3	3	1
YDR406W	292	146	103	203	370	183	434	233	183	1124	1012	891	907	1396	846
YDR407C	378	216	170	292	506	145	532	261	207	1083	934	892	980	1196	905
YDR408C	193	132	201	287	440	214	491	248	278	577	483	645	569	521	485
YDR409W	104	88	92	81	89	58	159	73	60	683	588	526	616	729	434
YDR410C	82	116	110	16	18	7	35	16	6	159	95	78	221	201	170
YDR411C	56	45	38	31	55	34	77	28	46	242	216	162	294	426	269
YDR412W	139	129	336	409	657	182	624	382	169	470	228	566	399	238	223
YDR413C	146	198	358	114	33	65	36	17	82	236	161	210	280	234	160
YDR414C	184	139	139	128	229	65	209	111	87	408	345	347	391	439	328
YDR415C	225	126	146	59	63	24	92	56	58	521	346	362	552	494	421
YDR416W	368	258	293	249	348	161	435	296	199	1213	827	993	1145	1043	870
YDR417C	71	55	50	113	164	114	263	84	174	814	647	395	1254	900	916
YDR418W	215	159	147	246	353	144	438	168	333	266	310	363	689	558	672
YDR419W	158	96	143	229	302	131	306	183	186	689	424	575	590	546	423
YDR420W	310	253	326	431	424	225	642	316	359	2789	2374	2140	3378	3256	2463
YDR421W	220	91	108	257	379	181	476	313	243	1018	739	876	634	822	665
YDR422C	152	86	124	530	718	340	777	476	379	1800	1432	1476	1806	1887	1312
YDR423C	135	113	71	297	442	211	458	287	234	784	641	694	803	887	577
YDR424C	517	390	323	134	155	105	217	102	160	121	107	125	89	117	125
YDR425W	106	49	40	98	132	64	133	48	67	396	321	232	261	384	237
YDR426C	21	24	13	9	21	4	14	4	7	14	16	11	15	33	13
YDR427W	663	589	552	277	352	194	303	135	201	555	425	355	614	670	405
YDR428C	96	85	81	89	140	51	176	70	76	291	196	270	289	347	216
YDR429C	897	779	1333	627	1005	422	835	419	516	1395	895	1049	1709	1272	1020
YDR430C	111	107	101	145	184	74	263	115	143	1054	858	783	915	1211	661
YDR431W	3	1	0	8	5	0	5	3	2	67	53	31	48	86	30
YDR432W	365	355	433	163	189	158	229	81	185	1692	1287	1323	2274	1679	1309
YDR433W	36	28	20	7	9	3	24	0	9	309	189	289	348	263	225
YDR434W	443	310	342	396	634	199	680	345	305	1064	886	959	984	1054	803
YDR435C	57	31	27	44	66	26	56	21	23	154	124	110	134	271	118
YDR436W	162	62	65	65	66	59	146	37	76	506	385	291	387	525	367
YDR437W	11	6	9	13	25	6	33	15	8	135	90	97	160	142	147
YDR438W	69	50	60	59	101	54	130	82	59	261	201	253	288	244	255
YDR439W	59	35	55	84	108	32	109	48	53	212	146	188	215	242	207
YDR440W	207	134	161	251	439	151	382	228	154	527	452	570	365	381	373
YDR441C	16	40	34	38	60	34	74	40	49	149	119	128	216	198	189
YDR442W	2	8	4	2	0	0	0	0	0	32	17	0	8	11	7
YDR443C	118	52	87	236	315	119	408	241	173	1194	969	951	854	901	751
YDR444W	117	61	99	146	209	99	280	173	116	797	738	779	702	606	626
YDR445C	64	51	82	47	78	56	224	78	204	63	46	63	52	66	56
YDR446W	9	5	26	16	27	12	27	15	4	45	40	39	49	25	44
YDR447C	630	589	475	164	189	72	251	117	176	347	294	298	563	607	618
YDR448W	199	136	127	177	213	90	301	145	133	932	645	788	712	658	613
YDR449C	224	282	345	336	474	172	455	243	188	1120	712	982	1356	1045	868
YDR450W	2029	1548	1762	1553	3121	849	3298	1312	1074	1815	1416	1784	2124	1795	1740
YDR451C	119	61	64	354	753	196	473	209	238	423	596	508	625	511	693
YDR452W	738	424	429	417	639	215	660	421	334	1678	1316	1344	1190	1502	1108
YDR453C	31	21	17	8	7	8	24	7	9	23	38	33	45	145	67
YDR454C	220	158	160	257	456	167	360	211	186	577	467	496	760	682	595
YDR455C	2	2	0	0	4	0	3	0	0	25	13	14	20	27	31
YDR456W	94	79	71	61	81	35	148	65	74	518	406	309	449	616	386
YDR457W	427	228	326	1006	992	513	1492	853	814	5965	5167	5242	6076	6812	5352
YDR458C	432	274	333	356	539	263	556	335	244	951	710	833	794	760	631
YDR459C	58	61	49	29	36	20	53	20	26	303	220	222	336	328	239
YDR460W	227	116	183	413	687	220	619	403	263	477	289	490	301	276	248
YDR461C-A	148	65	47	56	74	44	80	33	58	64	41	46	31	62	43
YDR461W	1	0	0	0	0	0	0	0	0	0	0	1	0	0	2
YDR462W	75	44	37	169	268	135	260	166	159	180	143	173	209	211	181
YDR463W	424	285	477	405	589	322	791	551	452	1665	1297	1516	1435	1437	1061
YDR464C-A	0	0	0	0	0	0	0	0	0	8	4	4	9	11	4
YDR464W	356	283	548	981	1059	385	1323	856	513	3314	2594	3165	2974	2408	1935
YDR465C	278	464	772	373	463	201	561	284	242	1311	675	1375	1376	938	726
YDR466W	184	126	100	347	512	238	586	329	268	1528	1277	1294	1169	1280	928
YDR467C	59	31	25	10	21	1	23	5	14	84	53	42	69	89	76
YDR468C	765	467	439	196	411	109	348	205	137	294	227	309	207	222	206
YDR469W	509	458	529	498	1027	268	788	435	304	415	332	429	302	314	295
YDR470C	64	42	25	80	134	48	159	87	61	353	330	333	227	316	253
YDR471W	1344	1116	1211	930	1385	630	1076	443	794	677	603	699	1118	900	998
YDR472W	54	45	36	55	95	39	92	42	58	248	210	197	414	340	295
YDR473C	998	466	725	354	508	178	544	374	224	567	324	560	313	303	286
YDR475C	262	143	135	230	317	168	493	260	228	1368	1100	1138	1174	1454	1349
YDR476C	38	26	10	13	35	25	40	18	28	128	126	119	226	230	161
YDR477W	242	223	182	193	274	190	358	189	182	1293	1032	1131	1201	1185	981
YDR478W	168	166	139	212	297	131	311	162	107	415	296	423	391	358	300
YDR479C	368	241	275	169	171	124	226	164	135	618	464	488	576	599	439
YDR480W	74	46	49	190	422	97	287	136	102	268	257	319	228	218	239
YDR481C	312	449	304	149	174	75	249	124	160	1286	1021	964	1749	1934	923
YDR482C	351	166	352	333	462	186	455	256	210	342	193	403	320	263	196
YDR483W	340	281	266	300	347	178	386	169	224	1362	1027	931	1935	1958	1213
YDR484W	205	166	112	254	416	155	317	170	151	557	440	420	466	595	472
YDR485C	378	235	312	539	695	338	812	571	331	1464	1046	1287	1188	957	757
YDR486C	466	298	373	624	904	446	674	316	406	567	396	498	440	447	338
YDR487C	77	92	68	224	273	159	191	84	127	370	342	339	454	547	415
YDR488C	25	18	14	61	76	35	114	42	38	271	377	411	227	257	293
YDR489W	48	27	30	82	87	36	102	48	45	236	192	204	312	304	243
YDR490C	155	87	116	212	321	162	389	209	164	884	677	736	606	889	465
YDR491C	16	39	92	73	61	30	118	43	63	261	243	210	284	312	170
YDR492W	38	104	135	34	30	11	75	26	46	229	272	179	383	507	227
YDR493W	61	50	47	59	58	25	69	31	48	107	74	86	128	156	120
YDR494W	740	368	589	301	441	171	394	240	224	511	325	447	430	421	332
YDR495C	285	189	251	491	798	198	738	418	303	1185	836	931	957	1121	841
YDR496C	709	942	1558	914	1097	508	1021	560	557	2417	1614	1842	3120	2355	1705
YDR497C	560	813	1324	497	616	404	764	452	541	1980	1734	1985	3236	4033	2202
YDR498C	91	48	49	136	203	98	188	97	115	368	340	334	441	469	383
YDR499W	353	262	239	280	399	133	543	283	185	806	642	786	694	776	593
YDR500C	1738	735	1375	1901	3258	1457	2582	1424	1398	325	332	479	642	487	593
YDR501W	78	54	40	179	385	104	238	177	125	300	299	383	266	240	380
YDR502C	45	54	73	36	57	43	124	45	89	261	432	217	595	779	452
YDR503C	52	39	35	104	156	57	122	66	66	224	163	163	242	275	205
YDR504C	38	54	44	23	59	8	36	17	4	45	23	37	32	42	44
YDR505C	344	191	185	191	307	165	360	131	228	1389	1072	880	1005	1309	844
YDR506C	25	21	21	49	92	39	119	65	48	403	334	282	264	375	231
YDR507C	347	173	137	1604	2720	598	2003	1465	577	1900	1814	2371	1796	1620	1684
YDR508C	362	354	487	445	582	309	787	401	398	2045	1526	1966	2541	2243	1621
YDR509W	17	22	22	51	37	19	65	27	11	379	208	258	288	236	107
YDR510C-A	5	2	0	5	8	1	5	1	1	1	4	1	0	2	3
YDR510W	86	74	70	136	163	108	226	116	120	319	284	299	333	348	328
YDR511W	89	66	64	65	82	32	80	36	35	128	80	90	112	167	100
YDR512C	717	414	322	190	363	113	293	197	121	208	116	209	93	134	88
YDR513W	513	269	163	185	268	153	202	96	128	157	107	79	107	166	133
YDR514C	170	189	269	92	103	25	168	97	67	532	287	528	408	294	258
YDR515W	359	307	360	216	275	103	222	97	115	451	300	289	360	333	248
YDR516C	114	59	35	50	62	36	96	49	94	150	188	104	112	467	220
YDR517W	77	42	52	103	125	122	226	125	127	477	505	476	374	543	409
YDR518W	196	155	165	729	1786	322	1038	534	298	647	673	623	541	766	633
YDR519W	176	136	116	102	190	42	109	50	51	192	130	136	178	191	156
YDR520C	167	103	97	140	151	68	234	100	112	778	487	627	692	613	530
YDR521W	8	6	7	125	210	70	181	133	67	93	45	84	79	54	51
YDR522C	26	37	49	13	18	4	26	18	10	74	49	60	68	94	70
YDR523C	23	57	91	39	29	13	60	14	30	274	235	216	345	471	144
YDR524C-A	1	0	0	0	0	0	1	0	1	2	2	0	2	3	1
YDR524C-B	160	197	244	147	158	156	259	114	210	730	580	399	1236	978	671
YDR524C	131	108	117	314	396	134	446	184	179	932	708	672	1063	1144	676
YDR524W-C	0	0	0	0	0	0	0	0	0	0	0	0	0	0	0
YDR525W-A	24	36	11	9	12	13	16	8	14	44	27	22	60	91	52
YDR525W	3	4	1	8	9	5	9	6	6	15	13	10	10	12	10
YDR526C	0	3	0	17	7	4	30	4	8	165	89	78	125	126	60
YDR527W	275	217	382	859	1367	506	1206	739	498	1319	1025	1396	1379	1068	819
YDR528W	102	144	116	467	652	288	531	263	196	816	598	731	1175	850	682
YDR529C	1139	793	622	280	438	206	392	177	250	606	386	418	246	359	304
YDR530C	86	56	63	101	127	63	173	52	105	323	253	274	330	427	300
YDR531W	110	98	77	47	64	21	74	38	28	212	161	146	209	280	163
YDR532C	769	573	673	289	384	129	396	265	175	463	267	429	337	312	305
YDR533C	336	205	115	56	84	49	98	53	43	325	193	189	247	330	265
YDR534C	18	2	32	15	13	15	33	4	14	108	118	100	41	64	55
YDR535C	0	0	1	1	0	0	0	1	0	15	9	6	6	13	5
YDR536W	21	9	18	25	33	14	52	36	20	275	203	182	158	298	180
YDR537C	3	3	6	3	5	0	14	0	5	28	19	15	35	32	41
YDR538W	16	13	8	17	29	11	41	23	16	155	143	134	150	151	126
YDR539W	175	144	135	103	104	78	214	139	118	520	405	473	454	552	416
YDR540C	55	24	62	53	66	26	64	39	29	81	47	72	79	73	55
YDR541C	48	20	25	71	100	30	106	50	32	182	144	165	162	210	179
YDR542W	2	0	3	0	3	7	5	0	4	3	10	2	3	1	19
YDR543C	0	0	6	1	3	2	7	0	0	2	3	8	1	2	0
YDR544C	33	10	96	68	74	48	69	24	21	14	19	24	9	9	11
YDR545C-A	0	0	77	0	0	0	55	0	0	69	33	141	135	73	38
YDR545W	155	101	144	256	265	169	366	153	200	1310	1026	1327	1391	1392	1214
YEL001C	249	243	180	212	291	140	288	132	172	560	507	522	1137	1009	924
YEL002C	235	198	177	201	293	174	292	142	253	924	864	655	1697	1780	1358
YEL003W	561	675	1115	621	789	424	670	369	387	406	293	338	579	657	720
YEL004W	90	62	36	74	91	35	89	29	35	239	186	169	342	440	319
YEL005C	137	70	66	87	168	78	149	72	90	178	140	134	196	301	236
YEL006W	196	149	114	62	109	48	162	85	81	497	362	378	790	813	659
YEL007W	301	171	238	268	344	209	451	236	296	1460	982	1036	1328	1339	1117
YEL008C-A	0	0	0	0	0	0	0	0	0	0	0	0	0	0	0
YEL008W	4	1	6	7	19	7	13	13	6	59	31	44	87	88	94
YEL009C-A	1	1	3	8	36	6	25	10	4	12	9	13	15	22	18
YEL009C	387	275	230	353	396	216	560	233	507	849	766	598	2115	2160	1990
YEL010W	1	0	0	0	1	1	0	0	0	5	1	0	9	7	6
YEL011W	431	303	229	144	280	139	409	232	232	914	868	586	1146	2020	1392
YEL012W	683	347	448	116	136	58	250	127	172	355	269	286	219	313	195
YEL013W	334	253	195	218	304	123	326	188	186	1035	822	738	1445	1799	1387
YEL014C	18	12	12	2	6	2	5	2	3	7	11	7	24	29	14
YEL015W	285	176	178	596	1092	508	1064	716	514	1472	1169	1433	2184	1877	1646
YEL016C	142	128	87	154	209	64	252	166	91	738	537	651	951	982	914
YEL017C-A	26	28	7	12	9	3	17	2	11	31	24	16	77	87	56
YEL017W	31	25	16	52	84	35	84	45	32	172	172	134	337	363	374
YEL018C-A	42	16	62	88	127	41	132	73	57	94	51	72	96	64	46
YEL018W	142	101	137	267	390	121	414	222	146	489	316	489	632	570	505
YEL019C	30	30	51	141	194	83	256	180	114	428	305	391	657	522	467
YEL020C-B	25	22	20	23	19	11	14	5	1	43	30	18	71	97	58
YEL020C	161	136	284	58	76	36	143	75	104	668	389	528	1460	1644	831
YEL020W-A	27	27	14	8	13	4	9	0	7	21	8	10	32	62	63
YEL021W	0	0	0	0	0	0	2	0	1	3	1	2	1	2	5
YEL022W	503	437	519	678	957	375	1186	747	534	2472	1874	2204	3558	3794	2738
YEL023C	197	127	120	91	138	66	151	129	63	433	308	371	522	510	574
YEL024W	144	91	38	35	44	25	60	17	34	230	146	106	191	348	212
YEL025C	144	83	85	135	253	84	248	155	84	651	707	516	1316	1797	976
YEL026W	73	132	99	140	168	93	214	78	145	384	347	319	1236	955	706
YEL027W	300	289	202	103	148	85	256	89	167	632	566	402	1396	1386	1073
YEL028W	26	11	17	18	39	10	32	12	9	89	67	80	140	162	119
YEL029C	142	143	138	61	75	21	90	44	32	363	254	272	535	592	430
YEL030C-A	0	1	1	0	0	0	1	0	0	6	4	1	10	6	4
YEL030W	52	23	27	161	265	107	182	96	58	331	284	251	335	303	334
YEL031W	344	419	424	688	802	421	1015	646	537	3538	3282	3223	6536	6551	4603
YEL032C-A	0	0	1	10	19	8	12	10	6	0	0	0	0	0	0
YEL032W	227	161	168	234	222	172	420	208	220	2012	1486	1796	4123	3481	2689
YEL033W	96	86	110	4	15	12	24	7	28	17	19	11	32	39	17
YEL034C-A	878	665	1237	1795	2000	2029	2222	1064	1613	1494	1255	1150	2292	2182	1637
YEL034W	0	0	0	0	0	0	0	0	0	0	0	0	0	0	0
YEL035C	5	1	3	7	10	6	12	8	9	40	30	20	67	99	49
YEL036C	310	259	502	397	530	290	599	304	307	1716	1610	1652	2795	2314	1763
YEL037C	227	189	290	214	240	159	295	138	170	1251	941	1131	2112	1595	1353
YEL038W	47	29	27	43	50	41	53	15	36	98	82	88	197	264	166
YEL039C	1130	706	537	65	95	37	66	39	71	115	70	67	76	176	136
YEL040W	186	224	204	221	292	175	293	134	184	914	942	752	4240	3240	2357
YEL041W	167	78	51	94	130	33	123	79	49	182	126	127	151	403	211
YEL042W	106	119	162	100	102	76	218	108	138	1163	1118	1044	2186	2067	1795
YEL043W	148	106	161	266	373	178	400	193	236	1595	1342	1209	2526	2580	1936
YEL044W	145	191	169	92	121	32	104	37	41	205	173	178	349	375	295
YEL045C	11	4	13	14	40	7	31	19	11	35	25	35	40	29	24
YEL046C	109	105	111	157	131	101	234	102	151	1013	786	834	2481	2115	1512
YEL047C	130	135	77	147	170	106	260	135	126	553	648	594	1027	1567	1096
YEL048C	55	66	45	27	31	18	33	16	25	125	86	84	229	257	167
YEL049W	1	7	13	10	10	3	22	9	7	83	61	91	131	121	95
YEL050C	189	132	176	159	238	100	302	187	99	607	385	561	716	806	547
YEL050W-A	16	19	16	0	0	0	2	2	0	3	4	3	4	10	10
YEL051W	1049	904	1194	1438	2955	993	2239	1148	969	1092	905	1039	1534	1815	1440
YEL052W	166	102	103	83	137	60	224	101	142	679	589	603	994	1066	925
YEL053C	75	53	54	102	125	47	156	69	86	610	493	489	984	1011	823
YEL053W-A	17	21	20	51	69	37	90	27	34	433	347	183	1011	847	700
YEL054C	214	197	143	269	381	200	574	181	494	384	428	420	1634	1302	1378
YEL055C	309	311	481	826	950	510	1232	793	725	2627	1870	2308	4501	3490	2797
YEL056W	134	84	48	114	157	83	218	115	126	451	383	370	530	705	630
YEL057C	24	15	19	11	20	9	31	19	13	60	46	51	70	72	78
YEL058W	170	113	121	98	144	74	237	124	132	810	766	742	1096	1331	1107
YEL059C-A	34	19	22	33	43	28	59	24	35	72	65	83	99	89	78
YEL059W	0	2	8	24	34	6	32	15	8	45	45	41	49	42	38
YEL060C	653	370	520	423	631	330	737	367	455	2524	2169	1811	3765	4655	2220
YEL061C	221	191	175	754	1530	343	1375	867	362	1554	1686	1619	2095	2027	2399
YEL062W	145	116	76	176	307	102	229	99	115	519	416	399	721	933	604
YEL063C	109	137	159	210	242	113	296	139	170	1013	894	792	2559	2840	1636
YEL064C	64	38	38	40	37	23	75	42	27	291	253	215	515	574	389
YEL065W	58	173	161	79	158	92	260	125	120	1199	730	837	3145	2151	949
YEL066W	23	8	17	75	101	50	80	43	36	79	66	63	149	182	177
YEL067C	17	11	12	50	65	34	59	29	26	95	92	85	102	175	119
YEL068C	17	17	17	21	28	12	29	7	11	55	54	43	68	136	92
YEL069C	29	11	40	38	49	26	58	24	24	302	231	188	373	419	320
YEL070W	16	4	28	27	19	23	56	24	23	39	32	61	84	98	140
YEL071W	222	254	269	195	365	183	386	161	245	1033	780	881	3611	3304	1678
YEL072W	97	92	86	16	22	8	26	14	11	106	65	76	177	216	168
YEL073C	10	11	6	3	7	1	7	2	3	37	32	33	95	143	83
YEL074W	18	17	43	30	33	25	50	18	16	84	58	93	77	85	60
YEL075C	0	0	2	3	3	11	5	2	0	25	14	12	80	53	38
YEL075W-A	0	0	0	1	4	9	0	0	0	186	128	173	320	307	249
YEL076C-A	0	0	0	43	0	0	0	0	0	0	0	0	0	16	0
YEL076C	5	4	14	0	68	51	98	30	37	307	231	292	477	414	353
YEL077C	248	137	204	193	180	101	289	137	128	896	670	1036	1262	1326	1112
YEL077W-A	0	0	0	0	0	0	0	0	0	0	0	0	0	0	0
YER001W	824	747	727	815	1239	494	915	661	434	2229	1946	2191	4304	4182	3747
YER002W	886	787	1818	402	528	270	630	338	239	710	361	805	765	478	431
YER003C	117	99	66	228	390	156	386	208	222	774	747	762	1251	1375	1361
YER004W	106	75	78	86	161	75	175	88	90	387	330	328	605	611	445
YER005W	155	140	139	139	154	74	243	122	121	868	696	751	1510	1584	1076
YER006C-A	10	8	13	3	2	4	3	2	4	26	6	14	27	27	20
YER006W	254	485	752	1290	1644	890	1598	965	740	2639	1690	2655	4884	3262	2415
YER007C-A	74	77	67	78	94	37	77	33	46	208	159	154	484	400	304
YER007W	102	75	67	27	27	11	56	20	29	208	96	173	351	394	292
YER008C	414	217	314	771	1138	471	1166	795	522	2290	1866	1939	3312	3729	2802
YER009W	111	151	61	48	61	30	53	24	40	176	148	107	583	551	415
YER010C	104	64	67	65	71	37	92	26	33	147	151	116	359	460	290
YER011W	29	31	24	29	45	37	175	58	120	183	374	166	210	1365	452
YER012W	621	536	398	189	270	110	243	130	165	400	346	259	712	724	481
YER013W	216	167	220	471	633	314	754	518	281	1737	1187	1618	2681	2497	1747
YER014C-A	6	4	13	0	0	0	0	0	0	5	27	12	14	39	34
YER014W	218	144	103	129	172	57	269	157	113	605	547	564	556	1132	671
YER015W	35	24	26	39	62	27	89	41	48	343	318	235	278	454	346
YER016W	189	100	109	123	199	52	193	92	100	407	335	517	432	498	508
YER017C	96	73	108	96	117	66	190	75	102	1219	878	849	1980	2119	1412
YER018C	34	35	32	69	109	41	80	55	46	137	151	178	297	364	312
YER019C-A	620	352	374	152	152	156	267	117	223	139	116	105	353	371	355
YER019W	94	61	71	101	133	72	207	93	109	602	608	510	1048	1385	857
YER020W	293	244	256	343	471	238	555	323	338	898	821	905	1719	1998	1376
YER021W	373	370	318	211	253	141	258	133	195	900	671	586	1427	1533	1149
YER022W	724	426	445	516	775	273	678	334	310	871	665	760	1246	1337	1071
YER023C-A	0	0	0	0	0	0	0	0	0	11	4	9	9	0	1
YER023W	143	97	70	120	190	96	259	146	169	493	571	525	793	1019	712
YER024W	144	123	105	222	257	147	396	201	260	1457	1372	923	1434	1762	1167
YER025W	312	304	392	558	767	374	960	487	445	1967	1281	1593	3227	2479	2026
YER026C	449	408	434	162	253	176	210	99	210	534	418	435	1290	1701	954
YER027C	120	57	62	134	297	144	283	173	123	612	492	560	862	983	793
YER028C	72	37	44	96	92	53	131	67	75	324	211	343	567	452	534
YER029C	214	158	354	289	528	167	431	260	174	380	241	354	558	389	389
YER030W	1624	1255	1608	912	1768	642	1332	799	644	546	459	581	401	514	432
YER031C	117	86	62	112	154	97	219	83	168	384	297	356	577	578	503
YER032W	66	28	74	127	206	79	267	116	151	682	759	665	1021	971	1013
YER033C	161	84	130	135	148	105	207	115	117	1335	994	969	1563	1793	1398
YER034W	56	45	54	154	187	177	184	125	87	290	197	249	406	372	278
YER035W	154	97	89	148	184	88	182	90	94	380	254	271	568	644	454
YER036C	431	395	516	913	1167	597	1102	601	601	2582	1868	2139	5529	4012	3024
YER037W	1640	1275	1021	375	454	182	488	305	207	967	375	610	1042	1415	917
YER038C	451	296	322	180	223	95	189	116	79	339	202	293	584	562	417
YER038W-A	0	0	7	30	84	20	55	35	6	7	8	21	12	5	0
YER039C-A	5	4	3	3	3	2	9	2	6	26	22	20	31	31	28
YER039C	17	11	5	11	5	12	20	11	21	80	83	57	207	179	154
YER040W	130	106	148	270	438	189	395	179	147	850	729	710	1109	1180	830
YER041W	96	64	92	125	169	89	230	137	109	605	409	492	792	914	614
YER042W	137	171	101	25	38	10	35	14	35	97	100	61	135	151	175
YER043C	152	211	203	292	263	192	443	187	419	1322	1261	1055	3927	3684	2173
YER044C-A	9	7	20	28	38	10	34	20	11	125	75	86	218	271	160
YER044C	54	55	25	8	16	3	14	3	11	32	39	26	55	161	95
YER045C	101	85	167	150	195	73	183	77	92	520	465	398	779	948	610
YER046W-A	35	20	29	0	9	5	14	15	10	27	17	15	44	51	42
YER046W	93	67	78	14	16	6	43	12	18	65	59	51	77	128	91
YER047C	263	170	238	500	619	218	757	478	296	1349	978	1303	1718	1586	1433
YER048C	605	395	570	661	1074	466	1044	701	439	980	736	966	1326	1304	1037
YER048W-A	215	210	177	118	153	86	156	91	95	242	182	231	349	443	307
YER049W	609	586	946	532	547	284	698	362	429	1950	1411	1765	3487	2481	2151
YER050C	468	380	447	151	213	91	158	91	114	287	208	214	479	511	338
YER051W	208	134	208	191	347	92	333	231	130	474	292	427	613	631	515
YER052C	59	60	72	95	109	49	124	48	92	363	343	283	898	930	754
YER053C-A	21	28	17	3	2	3	7	2	4	4	1	3	7	10	21
YER053C	380	231	119	97	120	63	134	63	57	339	303	272	468	772	857
YER054C	238	78	116	177	391	161	363	195	189	483	424	368	377	870	569
YER055C	730	676	743	767	1414	642	1056	600	660	1424	1215	1390	2034	2052	1807
YER056C-A	749	501	567	721	1196	664	1126	462	897	21	8	25	2481	1685	1763
YER056C	264	240	329	218	192	116	433	194	331	1535	1358	1280	3357	3010	2032
YER057C	286	201	146	240	319	175	421	194	228	440	351	366	559	646	470
YER058W	92	34	36	49	67	21	56	30	40	59	47	46	28	52	46
YER059W	217	123	103	224	369	144	412	308	231	493	461	429	522	758	697
YER060W-A	30	18	45	64	78	44	135	64	57	673	616	634	985	970	788
YER060W	44	25	39	61	76	51	144	45	76	591	534	495	910	884	783
YER061C	62	31	46	72	124	46	163	77	97	548	474	525	847	963	666
YER062C	366	174	132	194	226	152	293	120	215	845	490	542	1460	1849	1034
YER063W	104	67	44	81	136	52	92	71	50	269	250	203	449	625	385
YER064C	219	157	163	279	412	226	527	283	293	1275	970	1062	2127	1853	1267
YER065C	62	49	50	42	65	28	172	55	117	1198	1115	653	550	1018	772
YER066C-A	432	387	385	168	292	140	347	207	182	253	199	133	100	315	119
YER066W	49	26	16	14	13	7	28	14	13	49	36	39	61	125	68
YER067C-A	325	281	242	65	148	65	118	82	87	22	36	31	5	75	39
YER067W	336	440	311	120	163	75	258	111	77	457	364	302	142	623	219
YER068C-A	11	4	2	47	42	29	44	24	6	83	73	65	68	91	46
YER068W	158	122	172	362	523	284	552	340	283	1380	1077	1258	2172	1821	1421
YER069W	85	59	74	136	164	72	180	110	105	829	808	783	1023	1241	908
YER070W	242	225	70	333	380	137	465	237	388	1844	2037	2139	4209	4030	3946
YER071C	111	146	99	32	45	13	68	19	23	87	85	70	224	240	227
YER072W	594	526	494	259	320	205	509	237	447	635	422	633	1510	1195	789
YER073W	173	184	252	207	269	149	324	189	176	1637	1121	1286	2415	2512	1705
YER074W-A	191	180	127	31	25	20	54	21	38	81	73	49	155	186	143
YER074W	825	467	591	782	1355	559	1324	565	769	1030	894	933	2636	1907	1836
YER075C	158	153	273	407	477	228	634	278	296	1442	1101	1078	2108	2112	1357
YER076C	30	19	14	15	12	12	27	7	17	94	86	78	137	183	170
YER076W-A	17	17	6	13	14	4	17	3	9	35	26	28	48	74	58
YER077C	289	204	346	295	386	155	462	244	224	876	638	816	1018	1135	798
YER078C	76	91	98	97	121	56	186	61	68	458	382	383	716	819	612
YER078W-A	0	2	5	5	5	2	8	6	3	1	4	4	2	4	2
YER079C-A	5	4	2	21	15	12	28	8	8	135	91	77	136	169	120
YER079W	257	106	153	94	155	84	183	70	114	317	219	182	313	404	268
YER080W	426	240	259	531	867	376	925	523	454	1332	1120	1041	1443	2227	1281
YER081W	255	187	214	120	101	47	185	66	146	722	675	584	1661	1677	1165
YER082C	203	260	434	472	528	260	610	359	274	1688	1160	1650	3271	2296	1810
YER083C	88	65	77	54	82	53	97	41	65	391	356	323	901	899	619
YER084W-A	5	3	9	4	9	5	14	12	2	32	18	29	11	0	17
YER084W	15	18	25	10	9	13	24	7	6	116	116	98	108	89	78
YER085C	7	0	0	0	0	0	0	0	0	0	0	19	14	16	0
YER086W	65	53	52	177	206	110	231	110	161	588	556	545	1158	1235	1007
YER087C-A	77	54	53	55	68	45	75	39	31	74	62	86	70	137	80
YER087C-B	60	48	39	54	69	41	85	44	61	154	128	101	250	242	230
YER087W	71	21	18	31	40	12	59	30	22	220	161	188	217	434	282
YER088C-A	176	131	273	154	266	138	181	114	60	159	141	146	288	242	190
YER088C	454	287	332	279	321	192	520	218	327	1949	1611	1655	3545	2859	2706
YER088W-B	9	5	12	20	31	11	38	22	11	34	38	46	62	54	57
YER089C	90	87	63	168	204	109	278	118	100	1048	915	1001	1942	1940	1538
YER090C-A	0	0	0	0	0	0	0	0	0	0	0	0	0	0	0
YER090W	72	55	42	81	119	47	129	62	98	523	457	417	858	892	717
YER091C-A	1	1	1	1	2	1	4	2	4	5	1	1	4	4	1
YER091C	94	100	28	73	153	57	321	123	303	680	1275	537	1329	1650	1134
YER092W	368	165	249	252	316	221	349	187	183	279	170	235	340	355	313
YER093C-A	30	15	19	68	89	22	81	24	28	106	78	97	185	183	191
YER093C	173	112	133	263	320	144	434	266	180	1477	1126	1245	2371	2339	1821
YER094C	311	255	277	319	466	228	437	231	228	622	468	502	843	974	652
YER095W	149	92	79	284	339	193	313	216	160	663	428	659	1078	877	777
YER096W	69	67	42	24	25	20	23	15	20	273	167	154	255	238	169
YER097W	5	3	5	9	14	8	22	7	9	87	58	58	112	117	95
YER098W	217	155	137	96	153	49	173	94	83	682	473	516	878	1179	873
YER099C	176	147	178	57	81	20	95	33	49	358	253	288	835	702	606
YER100W	371	310	471	342	552	223	517	285	263	577	453	498	810	828	650
YER101C	82	51	38	38	73	34	96	42	36	335	229	280	298	357	299
YER102W	2321	1116	1310	714	834	589	1342	479	850	1844	1554	1751	4324	2872	2694
YER103W	360	199	149	251	314	134	631	366	212	1783	1026	1308	1675	2235	2095
YER104W	64	33	32	355	629	152	405	270	176	241	187	257	300	302	343
YER105C	253	208	200	370	413	246	652	339	371	2735	2067	2220	4414	4401	3218
YER106W	36	23	15	30	77	21	58	39	18	78	53	51	117	81	115
YER107C	132	136	108	93	133	54	153	76	55	346	257	306	644	699	506
YER107W-A	54	36	43	26	41	16	41	17	26	76	74	64	114	117	76
YER110C	427	528	864	981	1092	647	1485	768	819	4025	2832	3683	7485	5385	4550
YER111C	644	361	248	1676	3268	846	1913	1208	658	1772	1395	1829	1886	2371	1951
YER112W	861	666	766	384	558	217	508	203	295	508	422	449	678	679	557
YER113C	157	128	124	79	95	45	149	82	84	1009	796	856	1670	1619	1387
YER114C	260	166	270	503	538	276	868	472	445	2444	1879	2166	3992	3443	2800
YER115C	86	81	54	33	30	16	59	36	28	206	158	154	282	269	297
YER116C	91	43	72	165	204	92	245	138	150	490	345	414	633	599	585
YER117W	2099	1825	1507	349	447	307	806	343	668	1068	930	856	2549	2173	1900
YER118C	308	233	299	551	1147	301	866	465	300	1003	901	1093	1575	1387	1212
YER119C-A	15	11	10	34	30	38	52	20	26	153	136	100	228	196	164
YER119C	68	34	40	29	48	27	82	30	36	412	355	308	473	797	511
YER120W	156	119	124	192	368	220	359	180	200	759	698	691	1296	1134	1057
YER121W	193	111	63	78	207	120	113	64	91	134	86	87	64	126	89
YER122C	937	672	867	1173	2137	824	1789	1082	813	1822	1351	1623	2345	2186	1667
YER123W	428	230	383	490	640	268	645	338	360	1131	737	983	1570	1442	1245
YER124C	98	70	55	293	517	358	462	162	313	2741	2466	1280	3026	4409	1322
YER125W	628	341	397	840	1219	583	1312	810	777	2707	2027	2394	3569	3807	2632
YER126C	1389	1963	3150	724	1054	523	1111	728	563	1179	725	1115	2051	1566	1117
YER127W	723	536	1048	822	1050	500	1088	610	474	1774	1148	1965	2796	1996	1491
YER128W	55	37	41	89	146	47	119	54	38	165	132	116	205	216	164
YER129W	376	287	469	795	1090	421	1168	718	533	2387	1784	2111	3638	3283	2497
YER130C	538	238	207	407	419	184	485	297	252	1368	766	936	2155	2087	2138
YER131W	2142	1011	1913	1484	2765	1511	2801	1191	1704	1532	1185	1551	3491	2469	2267
YER132C	292	159	339	689	680	385	1006	557	507	3678	2734	2966	6782	6057	4656
YER133W-A	99	55	48	54	85	38	89	31	45	60	50	77	123	120	108
YER133W	2333	1944	2091	537	894	426	876	478	475	1351	1004	1022	1913	1970	1449
YER134C	68	41	35	142	227	87	154	104	79	200	144	179	248	335	249
YER135C	7	4	4	3	3	2	3	1	0	25	18	10	36	44	46
YER136W	692	413	485	408	608	333	703	355	435	1306	1057	1047	1823	2265	1418
YER137C	206	167	333	169	260	113	282	156	124	269	124	264	431	276	280
YER137W-A	11	7	9	17	14	5	30	15	15	55	22	43	73	52	54
YER138W-A	0	0	0	0	0	0	0	0	0	0	0	0	0	0	0
YER139C	129	105	58	58	103	39	91	50	59	225	159	153	272	314	270
YER140W	200	104	167	239	347	139	348	240	150	761	525	625	1378	1167	834
YER141W	156	110	106	161	252	107	261	160	173	697	554	576	1010	1443	889
YER142C	435	333	264	68	105	49	88	33	63	238	168	142	220	275	192
YER143W	79	74	61	95	148	70	134	63	85	403	339	285	529	633	475
YER144C	93	79	88	55	73	50	114	52	63	721	619	479	936	1237	607
YER145C-A	155	67	81	155	189	83	175	84	88	279	169	162	405	359	305
YER145C	247	306	419	371	529	262	963	538	409	2079	2000	2158	4730	2667	2211
YER146W	263	123	138	183	242	87	161	62	129	117	113	123	295	276	244
YER147C-A	68	61	106	135	207	102	319	195	143	261	175	305	349	328	227
YER147C	108	102	117	76	101	58	160	86	91	703	486	669	1146	1016	853
YER148W-A	39	41	39	45	63	26	40	24	23	66	52	47	88	101	111
YER148W	202	239	320	76	85	44	117	64	79	633	357	408	1118	996	746
YER149C	52	14	25	112	175	54	135	54	51	325	303	272	590	542	497
YER150W	499	338	211	246	390	288	278	135	191	352	237	274	805	1090	1049
YER151C	360	258	433	496	592	272	728	424	354	2079	1547	1936	2839	2715	1784
YER152C	72	49	28	35	28	33	86	25	55	610	628	416	438	1153	470
YER152W-A	2	2	5	0	5	3	11	6	8	248	205	107	158	302	110
YER153C	14	11	18	28	49	22	87	29	40	446	403	359	444	699	388
YER154W	116	103	196	219	299	140	332	178	118	849	646	616	1268	1306	725
YER155C	539	367	425	808	885	453	1299	764	676	4270	3649	3097	6490	7568	5049
YER156C	80	117	155	187	219	154	319	189	167	932	678	848	2003	1549	1171
YER157W	233	197	168	297	441	155	514	254	184	718	585	575	1175	1361	1176
YER158C	298	171	166	313	469	238	711	410	281	1008	736	883	1997	1767	1539
YER158W-A	399	326	677	113	120	89	213	119	130	151	86	170	155	147	134
YER159C	950	665	1118	447	825	269	964	666	417	623	368	613	742	572	502
YER161C	386	247	393	539	802	301	660	372	321	823	555	840	1138	900	787
YER162C	326	208	290	189	254	101	342	213	156	999	566	855	1053	1025	791
YER163C	196	90	71	53	69	29	77	33	78	256	216	193	441	542	394
YER164W	287	195	350	950	947	456	1372	821	541	3268	2534	3076	4396	3986	3106
YER165C-A	3	2	1	38	28	16	62	42	18	116	103	114	147	166	107
YER165W	340	343	340	724	925	588	1432	756	842	3585	3031	3370	7343	5504	4561
YER166W	286	171	253	705	902	415	1254	631	690	3874	3236	3221	4463	4828	4081
YER167W	287	168	240	513	669	313	933	554	439	2402	1702	1920	2833	2506	2038
YER168C	211	264	261	195	211	136	283	107	151	860	548	699	1529	1490	996
YER169W	210	162	170	221	224	140	292	130	147	1402	848	994	1659	1664	837
YER170W	178	88	48	87	133	50	147	94	86	175	155	224	175	239	219
YER171W	289	293	397	505	757	225	734	424	273	1260	884	1244	2248	2010	1366
YER172C-A	2	1	0	5	3	0	5	1	0	40	24	30	53	61	33
YER172C	277	241	353	631	707	367	971	552	439	3758	2689	3231	7006	6036	4390
YER173W	179	84	99	175	253	98	269	140	109	590	416	503	787	716	675
YER174C	214	194	179	101	126	55	148	66	62	283	212	250	425	491	475
YER175C	139	72	91	210	298	150	293	208	160	446	369	448	550	598	467
YER175W-A	5	3	2	2	0	1	1	1	0	9	1	2	7	16	4
YER176W	205	130	224	334	352	190	602	364	254	2149	1578	1846	2714	2530	1851
YER177W	795	477	448	617	877	563	980	501	695	1716	1351	1330	1360	2241	1442
YER178W	157	108	60	145	172	127	255	106	196	594	547	398	826	1578	868
YER179W	26	13	20	10	8	5	23	7	10	33	34	40	58	129	83
YER180C-A	20	12	15	45	64	13	58	33	18	64	37	55	104	111	89
YER180C	108	93	106	39	54	19	67	31	21	229	137	193	348	314	279
YER181C	4	1	1	1	6	0	8	2	1	3	3	8	14	22	10
YER182W	107	68	58	45	68	43	72	34	37	139	82	94	187	289	149
YER183C	69	57	53	129	170	62	197	96	74	267	169	269	454	478	357
YER184C	37	29	49	41	52	30	77	46	40	555	383	429	967	1080	621
YER185W	12	11	14	12	21	10	22	10	8	76	79	60	92	88	76
YER186C	214	193	178	53	61	26	93	48	52	402	290	298	551	585	398
YER187W	42	59	74	33	36	15	40	18	16	67	36	79	244	190	143
YER188C-A	13	5	9	1	3	4	12	0	4	8	1	16	8	10	6
YER188W	43	50	37	18	14	4	45	16	28	53	58	50	115	506	156
YER189W	0	0	0	1	0	0	0	0	0	0	0	0	0	0	0
YER190C-A	0	0	0	0	0	0	0	0	0	0	0	0	0	0	0
YER190C-B	0	0	0	0	7	0	15	22	0	0	0	0	0	0	0
YER190W	0	15	28	28	113	52	233	202	25	587	434	834	972	895	934
YFL001W	213	203	341	282	398	168	411	245	167	761	503	650	914	747	639
YFL002C	346	312	643	554	710	275	792	519	342	1002	693	1039	1122	858	705
YFL003C	54	44	63	61	82	27	124	55	44	268	157	212	284	214	198
YFL004W	246	286	272	446	639	276	829	580	384	1591	1339	1447	1779	1970	1253
YFL005W	801	760	885	475	799	367	781	397	426	783	594	712	738	719	594
YFL007W	314	279	371	656	718	383	841	497	442	3673	2537	2629	3108	3080	1910
YFL008W	679	359	384	1342	1993	553	1916	1325	573	2475	1733	2623	1973	1910	1696
YFL009W	142	99	155	93	117	64	198	92	111	842	585	633	823	875	593
YFL010C	66	68	42	55	90	50	88	42	48	433	375	405	404	415	308
YFL010W-A	166	124	136	104	197	104	209	118	81	217	194	286	225	226	175
YFL011W	6	3	21	3	8	0	12	2	3	25	23	35	9	25	14
YFL012W-A	9	8	11	44	54	24	64	37	26	108	93	90	67	64	53
YFL012W	18	26	32	27	61	16	46	37	16	23	29	33	23	12	15
YFL013C	220	130	156	304	485	194	595	418	227	990	801	1032	802	831	637
YFL013W-A	257	221	292	259	350	128	333	193	150	255	183	206	132	125	106
YFL014W	1547	601	420	494	563	381	590	357	652	865	555	342	242	578	585
YFL015C	23	16	20	30	42	15	41	26	11	5	2	5	3	5	1
YFL015W-A	0	0	2	1	1	1	2	1	6	1	0	0	0	0	0
YFL016C	328	180	239	319	485	178	495	322	221	857	615	716	565	692	550
YFL017C	86	68	55	26	48	12	46	19	23	182	163	177	125	126	154
YFL017W-A	62	63	39	17	37	16	32	7	21	31	11	17	35	34	38
YFL018C	311	169	90	242	358	167	494	266	292	1037	914	950	775	1111	835
YFL019C	18	16	10	3	6	3	10	6	1	26	21	13	13	15	8
YFL020C	12	7	15	4	8	7	23	5	13	40	30	50	28	29	28
YFL021C-A	11	6	10	21	19	10	38	6	13	160	75	57	123	113	93
YFL021W	104	60	85	58	85	57	88	41	58	739	718	422	531	904	460
YFL022C	179	154	171	178	231	122	365	167	238	1328	1043	1127	1653	1396	1056
YFL023W	177	162	280	420	490	215	636	412	199	1614	971	1687	1320	937	643
YFL024C	410	256	376	556	699	374	732	379	415	1759	1217	1418	1882	1545	1301
YFL025C	138	143	138	164	223	66	264	126	129	1135	941	929	1002	1266	875
YFL026W	50	43	49	43	38	20	56	23	31	114	107	78	157	162	140
YFL027C	286	167	145	120	169	61	193	105	101	307	259	278	263	326	220
YFL028C	377	325	330	127	250	84	170	71	85	346	266	311	337	368	279
YFL029C	148	85	66	137	194	70	176	120	101	307	222	274	196	221	184
YFL030W	81	33	17	10	11	11	35	12	28	201	174	124	115	253	131
YFL031C-A	4	6	5	1	0	0	0	1	0	4	4	4	7	8	6
YFL031W	775	533	585	241	393	247	416	257	366	1027	975	939	1680	1963	1462
YFL032W	10	4	5	5	2	3	6	0	2	9	7	6	7	7	7
YFL033C	284	166	231	359	495	251	717	372	345	2057	1852	1511	1629	2166	1413
YFL034C-A	400	291	334	266	368	163	0	0	0	380	265	338	656	589	548
YFL034C-B	70	71	54	98	119	85	143	68	61	444	415	422	520	520	368
YFL034W	310	192	241	346	424	192	725	433	376	1592	1034	1376	1215	1179	899
YFL036W	496	388	562	756	1117	494	1306	781	554	2049	1608	1692	1849	2099	1270
YFL037W	259	162	112	181	253	126	361	176	318	737	872	752	791	905	862
YFL038C	420	316	405	633	1085	374	1055	567	436	884	776	975	947	903	665
YFL039C	276	173	120	650	933	568	1300	572	888	1530	1514	1135	1977	2468	1683
YFL040W	30	23	16	12	12	6	37	12	10	103	99	90	111	141	90
YFL041W-A	0	1	6	0	0	0	1	0	1	4	3	5	2	7	2
YFL041W	114	87	82	173	242	102	278	158	108	1038	630	759	832	857	596
YFL042C	212	101	133	152	186	62	278	136	99	458	452	424	278	621	265
YFL044C	54	31	39	84	135	62	119	50	70	214	153	159	200	280	138
YFL045C	375	315	194	201	240	86	284	146	248	478	405	379	675	701	675
YFL046W	573	330	252	158	245	61	298	154	77	282	168	275	160	180	147
YFL047W	127	128	99	140	158	71	232	107	92	846	631	752	804	846	599
YFL048C	329	234	227	174	280	93	296	120	140	891	616	620	881	936	673
[truncated: 4,601 more rows]

## Sheet: tp55
ORF	Sample1_groupwt	Sample2_groupwt	Sample3_groupwt	Sample1_grouprpl22a	Sample2_grouprpl22a	Sample3_grouprpl22a	Sample1_grouprpl22b	Sample2_grouprpl22b	Sample3_grouprpl22b	Sample1_grouprpl34a	Sample2_grouprpl34a	Sample3_grouprpl34a	Sample1_grouprpl34b	Sample2_grouprpl34b	Sample3_grouprpl34b
Q0010	21	12	15	6	3	8	17	12	9	15	15	9	7	10	8
Q0017	1	3	0	0	0	0	0	0	0	1	0	2	2	1	4
Q0032	0	0	0	0	0	0	0	0	0	0	0	0	0	0	1
Q0045	104	124	116	128	136	90	380	270	317	2009	1852	2220	7950	7105	6389
Q0050	735	793	893	1356	1215	1124	2338	1753	1371	14255	13593	14534	37921	26708	24761
Q0055	403	480	509	782	748	670	1878	1389	1124	13264	12124	13432	34733	24865	23879
Q0060	35	25	32	56	51	44	120	69	68	841	842	931	1842	1593	1182
Q0065	41	55	55	59	47	33	110	74	36	836	782	940	2036	1885	1213
Q0070	43	41	36	132	172	158	324	227	112	872	994	1036	1343	1244	1095
Q0075	20	26	17	21	15	18	44	24	12	279	312	330	661	593	388
Q0080	1	2	3	0	0	0	0	0	0	0	1	2	9	10	16
Q0085	39	41	37	85	96	50	155	121	100	848	922	1036	3297	3032	2261
Q0092	0	0	0	0	0	0	0	0	0	0	0	0	0	0	0
Q0105	151	123	170	243	234	221	501	307	404	3826	3602	3731	9836	8503	7438
Q0110	56	62	60	72	76	59	100	80	92	343	422	474	969	841	713
Q0115	22	21	24	11	11	11	30	25	8	121	167	170	538	465	319
Q0120	57	55	45	123	129	103	168	165	79	550	552	651	1043	973	882
Q0130	80	59	50	34	42	65	97	85	123	121	131	157	752	649	798
Q0140	18	8	9	5	7	5	8	6	4	11	15	14	76	90	91
Q0142	2	0	0	1	0	0	0	0	0	2	3	8	12	11	8
Q0143	0	0	0	0	0	0	0	0	0	1	3	1	1	3	2
Q0144	0	0	0	0	0	0	0	0	0	0	0	0	1	0	0
Q0160	15	41	47	5	13	6	12	10	11	103	97	123	343	543	404
Q0182	1	3	1	1	1	1	5	0	1	20	13	16	21	18	7
Q0250	94	112	107	107	157	107	362	264	389	1366	1463	1601	5224	4797	4475
Q0255	15	12	14	20	33	13	67	49	22	206	237	276	697	602	401
Q0275	29	58	39	49	51	49	108	66	76	801	735	886	3513	3290	2934
Q0297	0	0	0	0	0	1	0	0	0	1	0	2	4	9	8
YAL001C	215	140	87	113	139	121	351	312	191	1434	1534	1499	1302	1063	973
YAL002W	77	88	57	68	96	112	243	167	122	1009	961	978	1048	859	764
YAL003W	462	621	690	2342	3959	2740	4862	4003	2126	3981	4229	3862	3660	2862	3146
YAL004W	0	0	0	57	5	54	79	85	41	170	199	166	59	102	78
YAL005C	709	341	294	303	372	440	780	675	621	978	1080	1094	1383	1145	1250
YAL007C	193	168	140	127	176	121	310	254	131	584	728	635	576	495	470
YAL008W	186	148	145	19	15	11	42	38	37	257	202	184	161	147	128
YAL009W	155	118	101	37	45	44	93	70	51	286	256	261	255	214	210
YAL010C	187	84	90	63	75	65	162	104	64	251	320	306	308	277	271
YAL011W	102	91	73	154	202	133	330	257	122	1024	1009	955	708	508	547
YAL012W	73	85	109	141	235	241	377	343	217	833	834	872	816	827	878
YAL013W	166	156	115	158	219	174	340	290	115	561	558	500	387	325	338
YAL014C	33	50	33	33	41	22	57	44	33	179	198	196	226	200	220
YAL015C	180	135	117	44	58	51	100	78	56	273	271	254	224	172	188
YAL016C-A	25	19	22	65	78	67	105	133	114	124	108	105	142	114	114
YAL016C-B	6	2	3	0	0	0	0	0	0	0	2	1	4	2	3
YAL016W	343	326	276	195	281	225	386	340	297	851	910	962	1043	979	990
YAL017W	294	170	146	232	407	289	746	609	352	1607	1429	1546	1448	1148	1198
YAL018C	4	3	0	1	3	1	2	2	2	14	11	10	19	22	13
YAL019W-A	34	49	44	10	16	8	26	21	8	115	102	87	52	45	38
YAL019W	227	265	262	529	631	514	885	734	461	3586	3930	3553	3279	2533	2590
YAL020C	75	87	61	22	21	40	49	36	42	218	235	202	228	182	207
YAL021C	125	74	87	147	167	151	316	228	202	1666	1793	1730	1877	1471	1564
YAL022C	76	95	59	59	107	107	139	141	135	654	603	587	920	861	942
YAL023C	180	313	264	128	210	189	353	329	311	2365	2514	2550	2929	2318	2525
YAL024C	91	78	46	422	619	359	974	818	365	1943	2462	2342	1755	1398	1412
YAL025C	723	823	808	626	900	488	1108	988	451	1717	1718	1508	974	895	1028
YAL026C-A	129	137	169	74	122	74	172	152	58	126	138	149	112	117	142
YAL026C	187	171	139	176	217	187	449	360	232	1905	2033	1996	2129	1840	1771
YAL027W	144	114	82	139	176	148	291	276	137	309	307	298	208	195	229
YAL028W	95	70	66	39	56	51	94	65	66	160	185	220	198	152	157
YAL029C	317	226	179	440	547	424	833	764	438	2092	2417	2491	2320	1842	1948
YAL030W	90	74	55	52	122	97	119	121	76	72	91	74	88	69	94
YAL031C	57	36	26	32	54	29	89	64	52	425	441	437	496	405	381
YAL031W-A	7	9	8	4	3	8	13	5	10	22	18	19	24	22	32
YAL032C	74	48	38	176	251	143	414	290	136	772	793	748	604	541	578
YAL033W	181	223	222	77	119	56	173	147	72	300	314	321	303	384	352
YAL034C-B	7	12	5	10	13	20	58	30	17	68	68	56	60	32	39
YAL034C	118	78	78	37	44	37	109	79	49	361	349	346	415	341	328
YAL034W-A	190	153	123	119	199	106	293	256	113	336	386	348	278	196	224
YAL035W	726	866	682	1680	2199	1750	2766	2781	1489	5030	5110	4753	4000	3412	3535
YAL036C	60	87	74	53	49	43	96	68	47	582	590	647	647	545	550
YAL037C-A	0	0	0	0	0	0	0	0	0	0	0	0	0	0	0
YAL037C-B	334	295	337	20	0	72	24	22	0	212	518	342	258	140	135
YAL037W	65	49	51	31	21	11	23	22	25	115	132	124	191	127	143
YAL038W	361	459	403	572	607	732	1207	1012	1794	2549	3275	2941	4725	2729	3578
YAL039C	56	46	41	45	67	56	89	70	50	553	421	384	471	392	420
YAL040C	65	77	84	45	43	56	96	41	58	533	508	521	746	578	669
YAL041W	246	207	189	248	297	253	469	393	291	1364	1379	1429	1526	1174	1363
YAL042C-A	47	51	29	27	40	67	54	71	66	215	151	141	166	143	138
YAL042W	300	403	331	169	259	217	438	347	250	1914	2016	1899	1985	1735	1897
YAL043C	84	93	72	137	151	165	250	168	159	1438	1553	1443	1378	1148	1238
YAL044C	89	55	51	56	89	75	177	151	125	299	348	342	390	281	355
YAL044W-A	13	21	13	7	3	8	6	6	10	68	61	66	99	89	91
YAL045C	16	10	9	42	54	156	83	55	51	22	25	23	23	13	17
YAL046C	14	12	11	8	14	14	18	16	17	47	43	46	80	81	73
YAL047C	150	104	106	128	172	90	246	205	88	397	424	424	364	339	347
YAL047W-A	1	2	0	0	0	1	2	1	0	8	4	9	16	17	15
YAL048C	41	35	23	47	71	73	143	115	72	448	415	462	481	409	399
YAL049C	135	88	97	113	197	114	385	306	127	357	408	374	240	209	222
YAL051W	118	96	77	119	158	131	286	219	178	1317	1284	1282	1641	1216	1242
YAL053W	102	114	91	101	143	91	183	143	141	1304	1342	1343	1854	1457	1496
YAL054C	48	27	24	29	32	29	71	44	54	650	357	403	432	397	392
YAL055W	130	66	38	73	169	125	272	228	149	167	166	153	80	41	48
YAL056C-A	12	17	20	9	10	11	12	22	10	53	44	47	69	70	50
YAL056W	472	357	325	262	337	201	550	443	313	1429	1501	1439	1418	1073	1093
YAL058W	39	53	38	63	87	71	159	117	54	681	711	654	655	586	582
YAL059C-A	0	0	3	46	27	23	93	50	0	150	124	79	6	12	15
YAL059W	367	578	518	201	247	193	162	182	173	508	496	491	592	685	565
YAL060W	130	88	67	54	109	111	141	126	112	206	209	245	345	262	331
YAL061W	425	197	174	158	298	251	472	389	244	544	449	472	473	358	425
YAL062W	79	73	69	44	53	62	121	72	62	546	460	435	441	385	379
YAL063C-A	8	6	9	1	2	0	3	1	3	9	11	10	5	16	10
YAL063C	89	77	41	102	114	108	215	152	100	623	662	611	606	442	449
YAL064C-A	1	1	0	4	2	3	10	5	3	52	48	45	56	51	47
YAL064W-B	10	9	2	11	12	15	21	18	13	58	46	63	53	42	50
YAL064W	5	1	0	0	2	2	2	0	1	2	3	4	3	3	3
YAL065C	0	2	1	0	0	1	1	0	1	16	10	13	21	27	20
YAL066W	0	0	2	0	1	0	0	0	0	2	3	1	2	0	0
YAL067C	12	9	6	28	31	18	85	68	39	127	112	121	80	56	55
YAL067W-A	0	0	1	0	0	1	0	0	0	0	2	0	2	1	0
YAL068C	4	6	0	0	3	5	5	0	2	12	8	18	2	8	15
YAL068W-A	2	0	0	1	0	0	0	0	0	1	0	0	0	1	0
YAL069W	7	6	1	8	7	14	20	9	12	12	3	3	1	7	6
YAR002C-A	277	220	209	433	743	736	777	872	509	673	771	725	786	682	715
YAR002W	192	183	166	692	994	577	1264	1069	482	1351	1405	1322	1141	1063	1016
YAR003W	454	416	347	95	131	98	176	153	113	425	471	452	409	308	306
YAR007C	142	148	162	105	154	125	275	230	177	949	1253	1111	1024	855	919
YAR008W	467	514	514	71	134	67	233	235	85	512	576	516	361	279	364
YAR014C	227	199	185	265	320	207	478	456	264	2008	2134	1951	1719	1272	1358
YAR015W	93	41	44	79	133	100	396	289	294	792	943	919	1435	943	1130
YAR018C	82	63	45	27	86	33	96	87	43	198	257	236	353	384	313
YAR019C	55	60	33	55	59	55	103	95	48	509	494	526	641	476	477
YAR019W-A	6	1	1	2	4	3	8	8	6	43	38	29	39	37	30
YAR020C	1	0	1	0	0	1	0	0	0	9	3	8	10	7	5
YAR023C	39	11	14	11	10	12	28	18	12	31	38	40	53	58	39
YAR027W	323	298	241	50	99	67	126	117	99	179	194	200	299	225	212
YAR028W	189	152	108	40	37	31	93	51	54	170	233	259	268	230	225
YAR029W	32	13	22	14	17	6	55	27	4	39	59	65	64	39	33
YAR030C	135	92	82	58	142	54	127	157	45	41	65	81	65	38	60
YAR031W	28	20	16	53	59	39	122	104	26	162	185	200	218	181	156
YAR033W	90	69	61	46	75	43	102	88	49	202	222	212	227	177	189
YAR035C-A	0	0	0	0	0	0	0	0	0	0	0	0	0	0	0
YAR035W	45	16	11	54	73	85	195	113	170	742	564	571	487	379	441
YAR042W	163	131	80	208	264	217	457	401	226	1845	1925	1900	1974	1544	1581
YAR047C	2	1	1	7	3	4	11	9	6	55	60	68	60	48	40
YAR050W	48	28	22	57	53	59	124	91	46	671	710	723	617	492	564
YAR053W	40	37	28	8	17	7	43	34	16	32	42	48	34	33	32
YAR060C	2	1	1	2	2	1	3	2	2	28	32	34	34	29	21
YAR064W	4	0	1	1	2	5	4	4	8	22	30	27	33	19	30
YAR066W	16	24	2	20	20	12	29	19	11	109	147	171	223	90	191
YAR068W	0	10	12	12	11	6	21	19	12	134	205	118	130	124	131
YAR069C	4	3	1	1	0	2	1	1	0	3	2	1	4	4	3
YAR070C	0	4	1	1	0	1	1	0	2	2	2	0	0	2	5
YAR071W	28	81	73	16	26	0	58	50	24	137	101	206	137	277	185
YAR073W	17	7	3	8	6	15	10	3	6	31	16	25	34	48	35
YAR075W	7	10	5	0	3	3	4	8	3	3	0	4	0	3	3
YBL001C	1177	770	764	344	551	569	842	879	590	456	484	406	376	295	368
YBL002W	176	79	86	101	200	186	349	252	253	503	652	699	395	353	297
YBL003C	1025	500	415	68	135	140	226	247	273	340	475	536	473	560	419
YBL004W	501	744	795	1059	1068	840	1349	1143	956	6101	6445	6561	8464	6952	6946
YBL005W	141	82	80	75	90	63	153	119	112	686	706	789	940	782	729
YBL006C	174	172	118	138	156	107	243	175	112	561	529	495	655	600	534
YBL006W-A	0	0	0	0	0	0	0	0	0	0	0	0	0	0	0
YBL007C	259	244	201	264	342	288	665	511	426	2703	2795	2868	3351	2487	2675
YBL008W-A	2	2	0	1	1	1	1	2	0	14	13	11	17	4	4
YBL008W	57	44	32	78	120	92	260	212	88	883	954	870	714	553	602
YBL009W	79	57	47	91	112	88	199	169	136	693	874	826	700	614	643
YBL010C	117	72	70	107	135	109	254	201	90	654	652	584	358	295	344
YBL011W	428	384	293	127	151	130	231	196	152	1090	1157	1138	1316	1023	1068
YBL012C	13	13	9	19	18	13	27	27	18	144	178	145	173	125	125
YBL013W	7	6	3	24	21	25	25	29	33	215	210	245	353	237	215
YBL014C	140	97	88	205	223	197	329	280	197	1425	1490	1442	1630	1343	1330
YBL015W	102	68	56	22	36	26	111	71	73	341	309	310	375	382	353
YBL016W	13	12	4	9	13	13	22	13	12	97	74	81	137	122	112
YBL017C	391	323	265	383	468	410	1021	886	486	3363	3652	3749	3186	2544	2552
YBL018C	50	75	81	11	7	3	28	11	10	120	117	124	146	174	157
YBL019W	107	84	52	36	43	40	76	63	55	272	254	247	257	190	196
YBL020W	135	131	112	144	198	157	308	262	218	1073	1167	1128	973	885	925
YBL021C	81	54	51	111	113	66	168	152	81	297	274	242	268	213	228
YBL022C	159	204	183	453	565	515	851	721	455	2221	2038	1986	1915	1802	1801
YBL023C	185	170	190	321	492	264	635	627	328	1634	1780	1564	1711	1165	1314
YBL024W	171	183	188	575	820	532	931	875	431	2082	2263	2210	2074	1820	1834
YBL025W	55	33	28	100	192	124	242	230	98	329	317	302	255	201	201
YBL026W	278	270	268	62	75	61	86	79	69	132	127	124	211	251	231
YBL027W	1292	1542	1572	1572	2231	2160	3117	2788	3065	3992	4158	3909	5229	4263	4764
YBL028C	590	816	826	651	920	781	995	860	553	672	649	535	492	482	447
YBL029C-A	78	26	43	17	18	16	59	36	17	48	47	48	83	62	55
YBL029W	213	152	136	110	115	107	229	203	154	340	353	372	364	287	288
YBL030C	97	172	161	67	93	110	136	116	169	426	471	425	630	553	639
YBL031W	133	73	87	392	694	485	808	726	391	507	674	609	393	324	382
YBL032W	249	161	120	281	442	375	645	607	359	923	1171	1088	850	794	836
YBL033C	95	67	58	97	129	116	185	174	98	652	669	576	883	546	718
YBL034C	211	157	145	267	383	238	604	540	253	1500	1866	1761	1771	1290	1352
YBL035C	198	234	253	112	132	112	285	257	157	855	1092	994	1147	866	875
YBL036C	754	764	704	193	222	180	338	323	213	607	583	584	527	434	476
YBL037W	129	82	39	75	88	87	191	163	147	681	782	794	797	624	685
YBL038W	275	170	151	78	118	57	250	193	110	601	552	551	466	424	392
YBL039C-A	0	0	0	0	0	0	0	0	0	0	0	0	0	0	0
YBL039C	197	262	227	256	267	229	373	279	278	2011	2101	2014	2280	2294	2244
YBL039W-B	26	18	13	0	3	0	7	1	2	9	3	16	13	7	13
YBL040C	571	637	581	111	173	146	235	214	128	502	492	485	447	434	423
YBL041W	219	234	232	151	189	157	305	215	181	529	522	575	497	533	560
YBL042C	175	61	60	75	73	55	150	150	116	873	976	1008	1399	1533	1288
YBL043W	70	39	32	115	141	90	211	139	112	221	239	246	178	163	152
YBL044W	2	2	0	0	1	1	1	1	1	5	0	1	4	3	4
YBL045C	218	150	140	59	97	53	158	118	119	435	429	388	424	340	409
YBL046W	200	159	99	212	351	204	524	502	214	804	889	778	452	337	356
YBL047C	451	393	363	630	872	731	1470	1235	855	4112	4007	3818	4151	3416	3822
YBL048W	18	19	14	26	39	25	47	53	18	94	106	92	52	53	30
YBL049W	118	63	58	10	15	17	39	29	26	93	77	88	77	94	83
YBL050W	405	301	291	202	251	180	516	453	222	608	587	572	593	545	559
YBL051C	181	148	142	180	253	188	353	236	186	938	967	958	940	721	741
YBL052C	252	134	104	151	272	134	448	415	125	732	797	914	516	412	442
YBL053W	464	237	186	169	291	146	306	353	126	127	155	107	29	11	19
YBL054W	138	136	176	575	726	613	771	607	392	1897	1707	1673	1710	1412	1572
YBL055C	89	152	96	83	69	61	124	83	82	586	589	605	833	649	681
YBL056W	246	269	201	150	211	163	304	207	224	674	730	757	1003	919	901
YBL057C	255	211	194	239	389	361	369	429	342	405	420	397	532	486	527
YBL058W	219	233	193	190	288	225	388	290	243	1061	1039	1009	1021	934	954
YBL059C-A	223	198	160	166	327	198	344	348	166	175	167	153	140	130	163
YBL059W	76	42	45	155	243	242	328	324	175	329	331	300	273	272	273
YBL060W	254	145	138	160	220	152	365	336	154	779	745	720	562	485	577
YBL061C	102	132	97	101	128	91	201	175	105	1106	1145	1131	1168	916	956
YBL062W	81	122	112	30	30	38	29	48	37	72	91	59	72	77	96
YBL063W	279	127	102	114	203	111	313	286	195	603	831	858	724	654	677
YBL064C	82	36	60	32	48	38	115	73	49	199	136	149	189	221	209
YBL065W	6	0	3	7	7	3	4	7	4	37	33	34	46	52	36
YBL066C	82	57	55	174	238	181	390	288	203	1102	1071	1187	1202	1013	964
YBL067C	252	259	252	273	286	224	539	386	309	1361	1447	1456	1203	1031	1050
YBL068W-A	6	3	4	1	2	9	0	1	7	0	0	0	0	0	0
YBL068W	83	136	124	125	135	81	158	135	98	557	538	554	687	710	611
YBL069W	89	74	70	53	56	47	106	84	62	652	595	667	502	447	459
YBL070C	14	17	18	16	11	10	20	19	21	154	136	127	102	106	91
YBL071C-B	0	0	0	0	0	0	0	0	0	0	0	0	0	0	0
YBL071C	22	22	32	26	12	10	29	24	25	150	122	113	192	200	208
YBL071W-A	15	17	19	119	153	95	203	168	111	245	240	228	245	233	284
YBL072C	834	897	800	1027	1834	1627	1960	2050	2293	1880	2009	1930	3232	2315	2784
YBL073W	10	3	1	7	5	7	12	6	5	71	67	71	88	59	62
YBL074C	48	28	22	101	158	83	222	227	103	488	492	501	510	415	409
YBL075C	137	94	79	89	100	62	839	427	190	1484	1275	1228	805	831	811
YBL076C	691	715	588	818	1121	973	1531	1249	1027	3587	3860	3880	4320	3845	3718
YBL077W	192	267	312	13	12	9	36	18	55	38	83	101	191	172	231
YBL078C	190	89	103	50	98	87	151	121	92	147	129	115	111	91	100
YBL079W	293	244	214	334	403	320	675	524	461	3122	3330	3294	3352	2840	2834
YBL080C	61	41	25	62	106	82	203	198	88	312	336	349	275	194	192
YBL081W	175	176	189	124	165	165	164	144	141	905	837	747	661	554	602
YBL082C	22	44	22	21	30	33	48	29	49	149	144	156	309	309	306
YBL083C	6	16	4	6	3	4	8	7	11	24	38	34	63	67	88
YBL084C	100	70	81	140	180	125	233	149	131	649	651	629	705	609	585
YBL085W	244	159	143	364	717	400	956	1017	444	1403	1739	1798	1502	1107	1227
YBL086C	188	246	191	272	572	399	680	534	268	720	700	726	528	466	453
YBL087C	285	371	325	201	222	246	393	333	414	691	768	737	1299	1192	1276
YBL088C	222	153	128	179	220	211	437	364	262	1836	1917	2048	2225	1752	1776
YBL089W	129	80	61	55	109	74	214	152	103	419	432	432	493	456	461
YBL090W	437	267	288	91	122	87	177	145	84	265	258	244	242	246	227
YBL091C-A	149	44	44	119	218	164	360	290	164	203	203	240	271	217	255
YBL091C	227	234	176	277	412	370	636	606	390	1207	1216	1122	842	669	764
YBL092W	622	752	1032	842	1424	1772	2157	2236	2574	1684	1672	1455	3201	2588	3003
YBL093C	852	414	429	559	648	477	844	774	556	1123	1095	986	979	637	731
YBL094C	45	26	31	8	9	9	0	16	17	0	14	18	21	13	17
YBL095W	32	24	27	17	35	20	88	49	41	252	293	269	348	231	239
YBL096C	19	16	11	3	5	4	13	12	6	45	44	50	34	19	35
YBL097W	212	63	51	83	137	95	349	375	149	809	958	992	612	439	542
YBL098W	276	109	97	294	384	212	578	542	220	454	568	529	396	409	400
YBL099W	139	180	136	243	360	391	612	472	536	1484	1490	1491	1155	927	1072
YBL100C	6	2	1	5	4	4	7	7	14	56	41	41	53	44	50
YBL100W-C	2	1	0	1	0	1	1	0	0	13	6	3	5	2	1
YBL101C	108	110	104	186	266	245	460	353	292	1655	1303	1240	1631	1198	1299
YBL102W	67	71	52	18	20	17	41	29	29	120	123	129	207	221	207
YBL103C	163	94	66	310	465	316	697	641	360	1013	1078	1087	890	668	736
YBL104C	105	86	60	97	114	113	198	174	101	919	1060	1057	1126	866	937
YBL105C	199	139	110	250	303	238	619	524	341	2384	2516	2489	2432	1793	2054
YBL106C	103	69	53	91	125	86	173	180	71	538	532	536	590	474	524
YBL107C	751	427	402	291	443	273	537	516	230	346	373	311	299	264	238
YBL107W-A	1	1	0	0	0	0	0	0	0	2	0	1	4	2	4
YBL108C-A	3	0	2	1	2	10	3	7	8	2	6	5	4	0	0
YBL108W	0	0	0	0	0	0	0	0	0	1	1	0	2	1	0
YBL109W	19	10	6	13	14	15	25	13	16	11	6	5	3	5	2
YBL111C	14	5	0	0	0	0	0	0	0	0	0	0	0	0	0
YBL112C	10	12	20	0	1	0	0	0	0	0	3	2	0	1	0
YBL113C	114	183	180	60	77	73	152	94	115	550	604	600	588	434	508
YBL113W-A	51	13	16	28	17	14	67	110	20	174	178	138	106	40	89
YBR001C	162	99	84	112	130	132	256	224	139	962	993	961	1142	784	827
YBR002C	141	121	107	196	237	203	427	368	204	903	856	838	759	637	662
YBR003W	70	58	57	67	105	84	207	178	102	433	508	509	393	295	324
YBR004C	103	91	79	17	28	18	24	25	36	254	226	262	468	411	356
YBR005W	24	39	31	15	26	18	28	32	35	170	205	230	421	289	277
YBR006W	220	163	157	149	204	128	367	289	108	445	317	353	493	790	539
YBR007C	182	86	83	180	188	135	415	330	183	990	1392	1320	1321	877	935
YBR008C	56	37	19	16	25	22	48	30	29	190	239	275	298	249	223
YBR009C	715	243	216	76	157	83	211	207	311	208	344	358	286	343	339
YBR010W	678	295	305	183	268	237	477	378	440	742	941	866	850	912	684
YBR011C	315	245	229	530	774	808	1012	976	860	1079	1375	1260	1074	906	1045
YBR012C	40	28	28	9	8	3	9	5	4	37	34	42	67	52	53
YBR013C	90	37	37	8	5	5	23	15	12	62	59	74	107	91	68
YBR014C	529	270	285	269	340	302	411	329	237	704	608	551	455	508	520
YBR015C	196	253	226	160	209	191	354	307	199	1809	1914	1846	2015	1665	1743
YBR016W	110	116	99	175	289	287	230	239	164	383	388	332	482	317	393
YBR017C	263	235	193	367	538	384	679	547	353	2129	2293	2220	2348	1846	1938
[truncated: 6,312 more rows]

## Sheet: tp60
ORF	Sample1_groupwt	Sample2_groupwt	Sample3_groupwt	Sample1_grouprpl22a	Sample2_grouprpl22a	Sample3_grouprpl22a	Sample1_grouprpl22b	Sample2_grouprpl22b	Sample3_grouprpl22b	Sample1_grouprpl34a	Sample2_grouprpl34a	Sample3_grouprpl34a	Sample1_grouprpl34b	Sample2_grouprpl34b	Sample3_grouprpl34b
[truncated: 6,600 more rows]

[truncated: 11 more sheets: tp65, tp70, tp75, rp40, rp45, rp50, rp55, rp60, rp65, rp70, rp75]
