# Supplementary material for: Translational control of methionine and serine metabolic pathways underpin the paralog-specific phenotypes of Rpl22 ribosomal protein mutants in cell division and replicative longevity
Source: bioRxiv preprint, doi:10.1101/2020.02.05.935726, version 1 (2020-02-06)
Supplement: File4 [file 935726_file05.xlsx]

## Sheet: wt
ORF	Sample1_40_rna	Sample2_40_rna	Sample3_40_rna	Sample1_45_rna	Sample2_45_rna	Sample3_45_rna	Sample1_50_rna	Sample2_50_rna	Sample3_50_rna	Sample1_55_rna	Sample2_55_rna	Sample3_55_rna	Sample1_60_rna	Sample2_60_rna	Sample3_60_rna	Sample1_65_rna	Sample2_65_rna	Sample3_65_rna	Sample1_70_rna	Sample2_70_rna	Sample3_70_rna	Sample1_75_rna	Sample2_75_rna	Sample3_75_rna		ORF	Sample1_40_ribo	Sample2_40_ribo	Sample3_40_ribo	Sample1_45_ribo	Sample2_45_ribo	Sample3_45_ribo	Sample1_50_ribo	Sample2_50_ribo	Sample3_50_ribo	Sample1_55_ribo	Sample2_55_ribo	Sample3_55_ribo	Sample1_60_ribo	Sample2_60_ribo	Sample3_60_ribo	Sample1_65_ribo	Sample2_65_ribo	Sample3_65_ribo	Sample1_70_ribo	Sample2_70_ribo	Sample3_70_ribo	Sample1_75_ribo	Sample2_75_ribo
Q0010	8.08	10.34	8.95	9.72	16.15	5.47	20.43	14.57	20.69	27.8	17.39	19.77	9.14	15.86	3.2	23.29	23.14	4.42	21.59	13.98	0	32.4	8.32	13.03		Q0010	0	0	0	1.6	0	0	0	0	0	0	0	0	0	0	0	0	0	0	0	0	0	0	0
Q0017	0	0	0	0	48.9	37.85	0	0	27.85	32.07	105.31	0	0	0	19.37	0	0	0	47.55	33.87	0	0	0	52.61		Q0017	0	0	0	0	0	0	0	0	0	0	0	0	0	0	0	0	0	0	0	0	0	0	0
Q0032	0	0	0	0	0	0	0	0	0	0	0	0	0	0	0	0	0	0	0	0	0	0	0	0		Q0032	0	0	0	0	0	0	0	0	0	0	0	0	0	0	0	0	0	0	0	0	0	0	0
Q0045	31.3	27.89	34.86	21.2	24.94	26.63	15.21	20.99	23.92	18.46	24.11	20.49	12.58	16.17	25.48	45.81	18.75	23.66	55.11	22.98	42.16	32.39	23.05	21.08		Q0045	3.68	1.5	1.88	4.33	4.72	1.31	2.26	9.62	0	0.59	2.92	3.96	0	1.62	0	1.28	0	0	1.55	3.44	0	1.95	3.96
Q0050	68.77	85.87	110.09	67.13	69.98	77.78	73.57	77.36	72.49	79.32	93.65	95.88	81.44	97.38	88.76	165.52	102.85	105.05	146.09	102.37	261.18	87.4	83.16	116.14		Q0050	3.18	0.82	0.16	0.3	0.15	0	0.41	0	0	0	0.13	0.29	1.02	0.33	0	0.42	0	0	0.47	0.35	0	0.2	0.89
Q0055	49.83	52.54	53.94	40.65	42.97	37.2	37.79	38.86	40.27	42.41	55.31	53.32	44.74	44.64	45.67	91.85	54.27	43.48	90.01	48.71	140.9	56.53	45.86	62.66		Q0055	2.74	0.99	0.03	0.3	0.29	0	0.13	0	0	0	0	0.51	0.5	0	0	0.07	0	0	0.23	0	0	0.06	0.22
Q0060	9.31	1.92	15.64	5.15	6.31	5.39	8.32	5.44	4.97	8.36	6.4	7.58	9.41	6.91	9.96	21.46	4.6	8.61	21.67	6.93	19.64	10.03	8.62	9.47		Q0060	0	0.22	0.06	0	0	0	0	0	0	0	0	0	0	0	0	0	0	0	0	0	0	0	0.26
Q0065	7.67	19.67	13.25	6.57	3.9	5.8	4.2	6.01	3.26	7	10.18	9.21	6.35	8.3	7.51	21.66	6.56	7.58	24.18	7.98	17.68	9.77	7.36	11.7		Q0065	0	0	0	0	0	0	0	0	0	0	0	0	1.2	0	0	0	0	0	0	0	0	0	0
Q0070	3.39	22.01	11.64	5.94	5.11	6.32	5.26	4.97	3.42	6.32	6.56	5.28	7.04	8.24	7.31	9.14	3.3	4.69	13.42	6.97	22.92	8.62	2.44	12.96		Q0070	0	0	0	0	0	0	0	0	0	0	0	0	0	0	0	0	0	0	0	0	0	0	0
Q0075	5.27	4.49	8.74	7.03	3.94	3.73	3.74	7.27	4.99	5.75	8.18	4.86	5.95	2.82	8.33	13.06	6.03	4.99	13.63	6.68	15.82	2.11	4.34	8.01		Q0075	0	0.27	0	0	0	0	0	0	0	0.96	0	0	0	0	0	0	0	0	0	0	0	0	0
Q0080	0	0	0	47.7	178.32	34.51	0	64.34	0	58.48	128.02	174.63	201.94	63.71	0	128.59	204.47	39.03	0	61.75	0	0	0	0		Q0080	0	0	0	0	0	0	0	0	0	0	0	0	0	0	0	0	0	0	0	0	0	0	0
Q0085	20.06	23.43	28.95	13.63	8.49	15.17	11.48	13.67	9.67	16.71	19.22	15.78	18.49	19.13	19.14	37.36	10.48	17.44	46.04	16.74	33.02	22.02	18.85	19.68		Q0085	4.46	0.81	1.12	2.34	1.72	0	3.83	0	0	1.43	1.51	2.06	0	0	0	1.12	0	0	0.94	4.63	0	1.05	3.41
Q0092	0	0	0	0	0	0	0	0	0	0	0	0	0	0	0	0	0	0	0	0	0	0	0	0		Q0092	0	0	0	0	0	0	0	0	0	0	0	0	0	0	0	0	0	0	0	0	0	0	0
Q0105	52.67	29.5	47.78	39.94	21.1	40.58	37.83	41.14	30.08	39.13	34.91	43.97	54.23	41.22	47.96	87.21	38.67	47.93	77.96	41.32	90.44	41.98	49.53	47.89		Q0105	4.05	0.49	0.98	4.61	3.13	0.72	0.33	0	0	0.86	1.53	0.97	0.61	0.79	0	2.04	0	0	0	2.52	0	0.32	4.64
Q0110	7.46	3.42	34.97	8.14	5.96	8.09	7.55	7.45	2.73	13.06	15.74	13.87	7.11	14.39	12.33	32.63	17.55	17.49	22.78	9.04	22.91	11.2	9.5	13.45		Q0110	0	0	0	0	0	0	0	0	0	0	0	0	0	0	0	0	0	0	0	0	0	0	0
Q0115	1.21	2.28	8.4	3.23	2.1	2.42	3.84	3.73	1.6	4.02	4.26	4.31	3	4.03	2.5	7.89	3.59	5.48	8.84	3.15	7.59	2.77	3.79	10.43		Q0115	0	0	0.05	0	0	0	0	0	0	0	0	0	0	0	0	0	0	0	0	0	0	0	0
Q0120	8.34	3.37	8.5	5.05	4.71	4.41	5.98	7.54	3.89	8.27	8.7	6.51	6.19	5.54	7.38	16.78	6.41	8.95	15.39	7.97	15.36	9.22	6.04	12.73		Q0120	0	0	0	0	0	0	0	0	0	0	0	0	0	0	0	0	0	0	0	0	0	0	0
Q0130	331.98	377.58	204.11	399.06	257.84	331.47	328.76	372.14	188.83	483.22	390.04	300.6	583.99	407.94	251.64	765.86	475.14	310.36	693.95	369.93	598.62	547.01	447.98	475.58		Q0130	20.95	0	1.43	0	8.09	0	0	0	0	0	7.12	6.46	0	9.2	0	0	0	0	0	26.11	0	0	6.01
Q0140	0.51	0	4.21	0.81	1.52	1.05	1.42	2.47	1.3	4.49	2.18	2.23	2.15	1.36	0.6	4.2	4.36	1.67	2.96	1.58	6.04	4.88	3.13	4.09		Q0140	0.43	0	0	0	0	0	0	0	0	0	0	0	0	0	0	0	0	0	0	0	0	0	0
Q0142	101.04	155.14	0	64.78	30.27	0	32.26	0	17.24	39.71	0	0	68.56	0	0	29.1	0	0	29.43	0	43.73	145.78	24.96	0		Q0142	0	0	0	0	0	0	0	0	0	0	0	0	0	0	0	0	0	0	0	0	0	0	0
Q0143	0	0	0	36.83	0	26.64	0	0	0	0	0	0	0	0	0	33.09	0	0	33.47	0	0	0	0	0		Q0143	0	41.99	0	0	0	0	0	0	0	0	0	0	0	0	0	0	0	0	0	0	0	0	0
Q0144	0	0	0	0	0	0	1.54	0	0	0	0	0	0	0	0	0	0	3.8	1.41	0	0	0	0	0		Q0144	0	0	0	0	0	0	0	0	0	0	0	0	0	0	0	0	0	0	0	0	0	0	0
Q0160	20.9	7.64	8.26	18.75	11.18	15	8.74	12.37	10.19	7.33	21.94	22.87	11.82	19.18	7.68	23.65	6.84	11.75	24.65	10.84	17.23	15.56	10.45	6.42		Q0160	1.7	0	0	0.67	0.65	0	0	0	0	0	0	0	1.15	0	0	0	0	0	1.07	0	0	0.3	0
Q0182	1.23	0	0	1.97	1.84	1.43	2.94	6.65	3.15	1.21	3.97	1.2	4.17	1.32	0	7.97	2.11	0.81	1.79	1.28	0	8.87	3.04	1.98		Q0182	0	0	0	0	0	0	0	0	0	0	0	0	0	0	0	0	0	0	0	0	0	0	0
Q0250	61.85	24.44	21.14	42.28	37.47	47.46	44.65	53.59	27.55	42	54.77	47.59	47.06	74.96	48.56	105.45	49.21	58.45	142.09	56.15	73.81	66.71	42.13	34.45		Q0250	3.88	0.84	1.8	1.22	2.39	0.82	1.14	24.28	0	4.46	1.58	2.15	1.05	2.04	0	0.59	0	0	1.96	3.86	0	0.82	2.22
Q0255	4.15	1.59	0.69	3.33	2.18	1.08	2.15	2.24	1.77	3.06	2.68	2.82	3.17	2.22	3.45	7.48	2.85	3.4	9.68	4.74	4.94	4.99	4.1	5.02		Q0255	0	0.19	0	0	0	0	0	0	0	0	0	0	0	0	0	0	0	0	0	0	0	0	0
Q0275	19.07	12.73	13.77	11.63	6.83	18.51	10.26	17.48	9.2	11.81	25.86	15.81	10.55	17.31	17.46	41.8	11.39	19.03	61.59	14.62	27.81	27.92	11.78	20.71		Q0275	3.53	1.15	1.25	4.46	2.18	1.13	3.12	0	0	1.36	1.44	3.92	0.96	0	0	2.4	0	0	0.89	4.4	0	0.5	2.84
Q0297	0	0	0	0	0	0	0	0	0	0	0	0	0	0	24.19	29.36	0	0	59.39	0	0	0	0	0		Q0297	2779.9	416.21	132.92	3124.85	858.44	924.58	1175.97	2176.74	0	1200.37	1888.14	685.78	472.76	610.2	0	393.64	0	0	350.72	216.52	1219.68	220.92	318.7
YAL001C	18.05	7.11	5.89	10.08	7.05	5.37	13.24	9.26	7.57	16.29	11.61	6.56	9.03	13.46	12.95	15.89	12.59	15.88	26.96	11.44	10.35	12.98	13.34	6.34		YAL001C	2.37	0.57	0.45	3.63	1.52	0.21	2.9	2.06	0	1.77	1.88	2.19	0.89	2.65	0.8	1.24	0	0	0.17	2.29	0	0.33	2.86
YAL002W	10.55	2.15	4.64	5.21	5.34	5.06	7.25	6.65	7.03	5.29	6.61	3.89	4.86	6.5	5.35	8.7	5.28	5.86	17.15	6.81	4.84	6.38	10.01	2.36		YAL002W	1.07	0.91	0.76	1.69	1.65	2.22	0.88	0	0	2.06	3.88	1.36	0.65	2.3	0	2.65	0	0	0.3	1.26	2.09	1.22	1.64
YAL003W	456.22	327.21	219.23	318.94	474.76	336.53	317.66	373.75	431.75	272.48	400.86	405.05	248.46	382.9	293.43	250.71	288.67	279.08	329.62	307.03	227.31	285.82	458.92	258.31		YAL003W	796.94	500.17	346.45	830.4	898.77	580.37	809.84	560.74	370.6	710.72	1071.46	805.39	226.87	880.27	78.73	590.65	459.77	551.44	197.47	768.77	466.81	327.01	663.24
YAL004W	0	4.77	0	0	0	0	0	0	0	0	0	0	0	0	0	0	0	0	0	0	0	0	0	0		YAL004W	45.76	13.84	8.41	19.92	3.93	0	43.71	15.9	0	32.02	15.53	9.94	0	23.47	0	17.04	0	163.32	1.63	22.11	0	2.47	29.5
YAL005C	39.2	13.73	17.59	53.03	22.54	20.22	83.64	70.84	26.06	102.02	53.76	42.05	24.47	66.67	82.2	45.26	43.88	42.08	89.9	45.41	27.01	31.66	87.71	28.66		YAL005C	273.77	17.97	22.39	269.72	35.61	38.62	239.62	33.73	32.16	226.91	110.46	118.27	211.49	163.22	15.07	289.28	160.69	143.28	31.07	268.25	128.02	25.5	223.58
YAL007C	59.24	17.33	35.59	66.46	54.09	43.83	99.97	86.6	42.84	106.99	101.92	77.24	80.39	126.8	100.41	113.35	99.81	89.53	136.82	109.46	51.27	127.53	94.77	67.29		YAL007C	36.54	9.95	12.87	58.4	25.98	13.3	48.1	0	99.52	27.68	50.29	29.95	10.47	43.06	0	29.05	34.11	39.87	3.64	50.33	0	9.85	41.34
YAL008W	224.04	92.84	97.21	134.66	98.2	125.09	137.67	159.62	85.8	116.32	101.3	90.25	53.98	150.54	103.08	80.67	62.31	89.73	171.04	89.14	45.45	75	87.26	57.44		YAL008W	24.95	18.9	27.71	24.81	32.66	27.13	19.15	16.99	0	14.57	36.84	21.07	11.81	27.62	6.59	43.83	12.83	0	4.11	17.57	38.07	19.54	22.38
YAL009W	81.1	33.47	49.22	62.54	62.68	50.05	57.77	55.14	50.59	66.4	55.15	43.06	43.64	66.73	43.71	51.49	56.16	45.46	57.15	54.28	42.45	58.72	57.56	33.02		YAL009W	1.49	0	1.83	3.52	4.02	2.77	2.73	0	19.23	1.43	5.55	2.29	1.01	2.61	0	1.96	0	0	0	3.24	0	2.1	5.54
YAL010C	32.18	18.19	17.7	18.51	20.11	15.22	26	27.32	23.08	36.28	17.83	17.38	27.46	24.93	21.9	40.52	32.89	33.4	41.27	27.65	19.65	39.88	32.43	23.55		YAL010C	0.67	2.93	1.65	2.65	2.08	1.25	3.47	0	0	0.65	4.11	0.93	0.92	1.77	0	1.91	0	0	0.85	3.15	0	0.95	3.08
YAL011W	16.29	9.27	12.02	13.3	19.21	13.03	16.74	18.27	19.95	15.12	14.76	10.77	12.28	10.17	12.45	14.88	13.73	10.78	20.66	17.06	16.98	17.05	29.81	9		YAL011W	2.83	2.8	2.07	2.23	3.77	1.37	1.14	0	0	0.49	1.92	1.74	0	0.68	0.52	1.26	0	0	0	2.24	9.03	1.73	1.92
YAL012W	41.36	17.75	11.94	22.65	33.48	18.62	23.79	34.99	24.55	18.43	23.48	27.39	19.61	17.6	23.01	31.08	20.3	18.7	54.82	21.86	8.34	19.15	76.47	24.02		YAL012W	156.31	153.04	129.62	141.61	136.9	160.55	140.77	61.71	90.64	73.95	143.94	92.35	19.66	98.42	5.32	55.22	62.14	18.15	19.33	99.31	46.11	84.13	153.1
YAL013W	36.05	24.81	17.33	20.72	59.58	16.72	39.09	35.74	48.15	40.55	41.7	27.96	25.72	18.89	18.88	15.22	36.72	14.51	42	28.11	16.68	33.48	75.53	29.25		YAL013W	6.78	10.38	7	5.35	14.39	5.86	9.97	0	0	5.69	8.35	5.75	1.15	7.81	0	6.08	0	0	0.53	8.18	7.44	5.69	5.34
YAL014C	24.04	3.42	8.87	17.84	14	13.16	16.7	16.36	12.53	14.43	23.94	14.37	7.55	8.58	16.11	10.26	6.88	13.43	33.39	12.01	8.67	6.42	31.89	9.33		YAL014C	8.35	2.89	3.32	10.17	10.54	4.04	8.93	0	0	2.91	11.34	5.85	2.06	9.33	0	6.3	8.97	15.73	0.96	4.73	0	4.82	6.52
YAL015C	26.83	17.49	19.33	32.04	35.25	30.81	46.66	46.5	42.32	44.76	36.74	28.95	51.94	52.27	40.23	37.36	52.16	42.81	51.42	47.78	38.88	46.86	50.63	42.82		YAL015C	1.29	2.82	1.41	4.08	4	3.9	3.49	6.75	0	1.66	4.1	3.59	1.76	4.17	0	2.77	5.1	0	0	2.96	0	1.07	3.21
YAL016C-A	77.11	0	7.25	45.84	33.21	39.73	44.49	43.53	35.84	54.47	45.47	47.07	18.63	42.18	32.61	39.31	33.88	31.53	49.88	48.09	9.53	21.01	79.39	50.43		YAL016C-A	4.21	11.75	12.39	6.56	10.42	0	3.11	0	0	0	6.16	10.32	0	4.12	0	3.26	91.63	0	0	3.01	0	1.48	4.48
YAL016C-B	47.35	0	52.4	37.94	23.64	73.2	37.79	51.18	53.86	93.04	33.94	46.3	53.54	84.45	102.98	79.55	135.53	20.7	160.9	32.75	0	113.86	38.98	25.43		YAL016C-B	0	0	0	0	0	0	0	0	0	0	0	0	0	0	0	0	0	0	0	0	0	0	0
YAL016W	85.93	38.69	45.77	62.82	35.71	43.88	56.13	50.24	32.6	49.9	51.91	40	38.46	53.14	41.75	53.37	48.36	51.8	75.63	52.4	37.84	43.84	62.71	30.5		YAL016W	19.92	10.89	12.58	28.25	20.94	18.01	26.37	3.96	0	16	35.27	25.16	5.84	26.34	1.02	21.53	8.72	5.24	5.1	24.19	4.43	13.91	28.51
YAL017W	17.6	4.52	7.39	13.47	11.17	8.95	21.77	16.55	10.05	18.9	11.96	9.34	9.1	16.17	14.67	15.22	11.8	11.45	30.02	14.32	13.59	13.37	18.67	8.54		YAL017W	3.79	1.21	1.07	5.19	3.27	1.48	4.43	0	0	3.21	4.77	2.51	1.21	4.01	0.23	4.63	1.32	4.62	0.7	5.42	3.91	1.22	4.28
YAL018C	3.58	0	0	0.78	0.97	1.32	0.26	0.7	1.11	1.28	1.05	0	2.21	0.35	0.77	2.34	1.12	0.64	5.92	1.01	8.44	2.35	0.8	0.52		YAL018C	0	0	0	0	0	0	0	0	0	0	0	0	0	0	0	0	0	0	0	0	0	0	0
YAL019W-A	20.78	9.19	0	6.1	43.95	3.09	22.44	20.56	23.92	22.75	35.95	29.48	22.6	14.3	12.37	11.36	29.61	9.2	24.91	26.92	13.12	38.13	36.58	17.89		YAL019W-A	0	0	0.59	0	2.65	0	0	0	0	0	0	0	0	2.11	0	0	0	0	0	0	0	2.06	0.9
YAL019W	33.44	19.47	13.42	27.43	32.52	28.62	22.32	30.83	33.13	17.67	22.58	20.29	18.95	28.32	18.24	23.79	20.41	20.52	28.79	24.91	12.69	21.91	24.37	14.43		YAL019W	3.78	5	3.3	4.58	13.76	7.91	5.27	10.57	0	2.07	10.91	6.91	0.55	5.93	0.55	2.91	1.6	0	1.02	4.71	0	4.86	4.57
YAL020C	19.42	12.71	13.62	17.91	15.14	15.76	24.63	28.01	23.4	23.27	29.53	18.77	13.1	22.43	21.98	17.47	31.83	17.67	31.91	26.51	22.61	27.14	28.68	16.14		YAL020C	4.84	2.93	1.71	3.82	5.42	3.43	3.56	0	0	4.13	8.4	4.47	0	5.16	1.09	3.45	0	0	0.68	4.35	0	2.47	4.82
YAL021C	15.87	5.04	4.36	9.73	10	6.66	11.18	12.18	8.96	13.44	8.71	9.31	6.13	8.32	8.5	9.53	6.2	5.1	20.72	8.63	8.29	6.58	23.79	5.47		YAL021C	11.94	13.9	10.65	15.11	16.53	13.71	15.34	5.84	0	5.01	22.42	11.4	2.28	18.01	1.51	9.29	13.23	7.73	3.76	17.74	3.27	9.06	14.53
YAL022C	13.27	2.87	3.72	13.93	11.76	9.65	14.03	12.13	12.92	13.96	19.1	10.79	10.47	11.6	13.64	11.85	10.6	9.68	28.86	12.8	14.16	7.19	31.4	11.45		YAL022C	12.74	3.3	2.26	9.55	13.28	4.75	16.64	9.98	0	7.95	22.72	10.71	2.6	11.47	1.94	8.66	15.07	13.21	2.81	14.69	5.59	4.61	17.35
YAL023C	22.76	10.28	6.87	19.51	24.62	13.9	24.48	23.82	21.19	21.53	40.97	31.43	13.63	28.92	22.31	20.95	15.68	19.48	50.8	25.76	11.59	20.2	37.14	10.99		YAL023C	53.32	14.68	11.79	57.77	37.96	21.97	60.74	25.99	0	40.61	72.57	46.38	15.24	66.67	1.68	29.14	34.35	25.81	7.07	66.18	43.69	20.22	53.51
YAL024C	4.69	2.37	2.46	1.58	2.77	1.22	3.94	2.33	3.94	5.51	5.17	2.77	3.87	4.29	4.68	7.41	4.55	5.13	15.62	5.5	5.87	6.82	8.38	3.18		YAL024C	1.79	0.29	0.14	1.82	0.41	0.56	1.31	0	0	1.41	1.64	0.78	0	0.92	0	0.91	1.24	2.18	0	2.68	0	0.19	1.75
YAL025C	692.25	455.22	658.17	457.75	751.54	625.49	267.16	352.33	763.34	249.24	310.51	277.23	294.61	232.06	212.3	154.87	275.99	229.14	154.58	263.54	195.11	279.28	325.44	342.67		YAL025C	11.96	29.3	33.33	14.15	77.55	43.91	16.72	18.73	0	12.62	28.43	31.71	4.88	17.33	1.21	4.52	28.29	0	11.32	21.98	0	29.14	16.11
YAL026C-A	98.55	119	157.77	122.73	164.69	149.37	131.54	183.65	176.7	133.83	156.5	174.77	111.28	235.09	119.45	155.22	154.31	143.98	166.87	175.32	161.86	188.23	191.64	125.82		YAL026C-A	3.61	3.72	3.49	4.72	4.18	5.6	4.82	84.7	0	0	7.84	10.18	2.46	4.42	0	3.84	0	0	2.28	4.5	0	1.99	8.08
YAL026C	16.44	9.24	10.69	11.41	10.23	9.83	10.43	11.73	10.81	12.06	12.02	8.92	7.12	12.74	8.93	10.54	8.12	10.38	21.83	11.86	9.27	9.47	14.2	8.58		YAL026C	6.03	3.54	2.63	6.49	7.41	4.29	5.69	1.76	5.77	2.36	9.6	5.94	1.52	5.7	0.45	3.93	3.96	2.31	0.84	6.19	7.83	3.86	6.66
YAL027W	92.35	39.76	71.64	74.36	49.13	60.3	75.43	56.91	50.44	61.06	52.9	34.61	32.21	60.5	58.63	49.1	44.47	63.39	63.17	58.2	42.95	48.78	53.3	57.73		YAL027W	0	0.8	2.71	1.74	2.84	3.13	1.62	0	0	2.8	5	0.68	0	4.52	0	3.61	0	0	0	2.29	0	2.6	5.06
YAL028W	14.05	5.6	9.09	14.48	8.75	8.78	22	15.19	8.56	17.04	13.74	11.78	8.98	21.1	14.4	12.49	16.61	11.49	26.05	18.56	14.22	15.8	21.64	11.47		YAL028W	0.31	0	0.17	0.98	0	0.66	0.46	0	0	1.19	1.06	0.19	0	1.37	0	1.88	0	0	0.39	0.19	0	0.22	0.71
YAL029C	19.4	6	11.17	17.47	11.25	13.41	19.47	16.3	11.53	18.71	14.6	10.52	14.78	15.82	14.86	22.97	18.47	19.54	25.81	20.5	11.05	19.21	22.93	12.59		YAL029C	3.79	2.17	1.4	5.49	5.93	2.45	3.69	1.6	0	3.14	6.47	2.49	0.97	4.31	0.21	3.02	3.63	4.24	0.9	4.98	3.59	1.92	5.87
YAL030W	102.96	50.19	43.41	119.18	95.47	44.53	193.06	111.3	75.3	144.52	130.05	87.9	69.31	94.45	73.68	91.79	70.17	84.66	113.07	83.08	67.19	94.32	211.94	94.82		YAL030W	19.5	34.88	25.87	50.53	30.1	16.31	38.93	87.24	0	16.04	60.54	24.91	11.37	39.13	0	44.17	0	0	0	38.18	48.88	14.76	41.51
YAL031C	6.28	4.67	2.57	3.47	4.73	2.32	5.84	4.66	3.41	6.76	4.75	3.14	2.47	3.69	3.15	5.06	3.58	3.23	11.64	4.82	4.01	4.13	9.78	1.38		YAL031C	2.07	0.68	1.37	3.27	1.44	0.68	1.37	0	0	2.78	2.39	1.42	0.85	2.36	0	3.52	2.45	0	0.52	2.98	3.64	1.76	3.36
YAL031W-A	28.47	17.68	20.21	19.24	3.55	17.47	32.79	38.67	8.08	16.83	21.51	17.04	0	36.1	16.88	38.49	7.29	15.74	39.35	32.96	18.7	26.89	30.83	10.95		YAL031W-A	0	6.39	1.84	3.1	0	1.79	5.77	0	0	0	0	8.12	0	0	0	1.48	0	0	0	9.51	0	1.39	3.87
YAL032C	33.65	16.53	10.73	12.73	16.13	14.83	16.97	20.08	22.51	19.57	13.9	10	14.61	15.27	13.1	18.61	16.64	15.89	26.27	17.6	11.65	15.54	31.92	12.15		YAL032C	2.29	8.74	4.64	4.34	8.15	6.35	4.73	0	0	1.76	4.99	3.82	0.62	3.22	0	2.25	5.43	0	0.58	5.15	0	2.43	5.52
YAL033W	167.05	186.65	132.8	140.16	251.4	211.88	116.43	222.11	201.41	139.47	188.07	170.26	220.84	211.52	201.92	161.52	191.27	174.85	186.19	208.3	198.55	228.21	127.86	176.96		YAL033W	10.69	21.83	15.7	14.76	27.86	18.49	20.65	20.93	0	20.52	27.23	22.67	0	19.95	2.71	11.1	0	0	0	15.82	0	9.91	15.32
YAL034C-B	21.19	12.55	0	7.87	14.72	6.63	7.85	17.67	13.95	11.24	21.09	8	11.11	13.99	11.65	10.6	11.24	7.5	17.88	13.58	10.61	15.72	20.02	5.28		YAL034C-B	2.91	6.25	4.19	0	0	0	4.24	0	0	0	0	0	0	2.6	0	0	0	0	0	3.59	0	1.1	0
YAL034C	19.67	9.32	11.29	20.24	14.19	11.41	34.12	23.37	13.88	28.16	20.37	18.53	11.95	24.17	21.18	18.54	19.19	14.81	34.14	20.16	16.29	18.11	36.3	12.13		YAL034C	2.9	2.03	1.87	3.27	2.24	0.88	0.3	0	0	1.59	5.06	3.45	2.82	6.18	1.68	9.69	0	0	0	2.32	0	1.75	2.37
YAL034W-A	47.96	23.19	26.32	39.33	44.1	35.46	55.74	53.46	52.82	70.48	62.11	45.41	59.55	67.48	60.02	49.48	60.3	47.53	54.98	58.75	40.03	67.18	49.46	40.15		YAL034W-A	3.19	2.06	1.93	1.52	3.48	2.74	3.28	0	0	3.7	6.56	1.79	0	2.22	0	1.46	0	0	0.81	2.78	22.58	0.88	2.21
YAL035W	101.82	107.97	119.72	62.28	111.71	65.26	61.88	71.43	114.79	64.3	83.95	60.14	57.97	64.26	38.83	62.39	70.29	49.83	65.13	57.62	69.06	80.21	110.24	50.71		YAL035W	25.96	56.38	40.72	32.24	70.81	42.52	32.78	26.47	23.85	22.73	74.22	53.79	9.82	60.3	3.73	22.51	25.44	25.48	12.02	40.97	21.57	32.78	43.95
YAL036C	33.09	8.54	12	24.51	22.49	23.05	16.65	25.85	25.86	16.39	26.01	20.12	18.4	24.7	18.64	20.62	15.28	18.6	31.59	26.54	16.85	26.08	28.51	8.07		YAL036C	23.64	23.74	15.21	25.05	45.37	24.46	27.89	7.42	0	22.74	57.94	33.76	3.87	28.29	3.84	13.6	33.63	9.82	5.98	25.1	16.63	17.57	24.72
YAL037C-A	0	0	0	0	0	0	0	0	0	0	0	0	0	0	0	0	0	0	0	0	0	0	0	0		YAL037C-A	0	0	0	0	0	0	0	0	0	0	0	0	0	0	0	0	0	0	0	0	0	0	0
YAL037C-B	79.06	96.82	25.75	70.39	62.2	65.03	62.35	89.99	56.82	107.12	103.66	107.68	62.71	123.31	85.89	96.48	87.6	99.16	137.73	98.37	36.46	73.37	216.02	41.57		YAL037C-B	390.19	104.07	46.08	404.81	203.13	165.44	302.57	188.05	86.41	378.48	293.62	205.51	155.81	237.02	10.76	142.66	182.03	339.73	65.63	203.17	0	66.85	273.89
YAL037W	20.1	12.86	18.07	20.13	19.44	16.51	25.73	24.44	17.5	26.74	22.06	20.88	19.18	20.61	24.09	21.71	17.26	20.04	32.32	18.24	10.87	23.16	12.41	12.82		YAL037W	0	1.17	0.1	0	0	0	0	0	0	0	0	0.44	0	1.25	0	0.81	0	0	0	0.44	0	0.25	0
YAL038W	78.25	33.36	16.93	63.66	59.59	35.63	66.31	77.9	45.41	68.91	95.82	76.5	30.89	60.72	60.32	61.07	40.96	42.77	103.79	67.02	24.54	38.09	151.92	30.36		YAL038W	1384.43	536.68	329.33	1526.12	794.13	473.82	1325.19	655.44	359.78	1026.45	1137.15	1047.06	537.42	1026.35	112.94	620.18	1125.06	1410.81	199.02	1434.74	1876.73	361.77	1415.39
YAL039C	36.49	19.1	11.01	25.58	34.16	21.87	33.75	38.54	27.59	22.81	20.51	16.62	9.85	15.09	15.49	12.54	11.39	10.87	34.72	17.64	12.56	11.96	41.48	12.7		YAL039C	12.01	15	12.36	12.26	30	24.44	10.4	11.07	0	6.78	21.12	8.72	3.85	6.82	2.86	12.01	0	14.65	5.35	11.45	37.2	10.98	5.67
YAL040C	10.5	6.3	9.81	12.23	14.75	8.75	14.14	17.91	11.06	10.48	13.58	13.48	7.51	9.31	9.15	11.22	8.45	5.92	21.75	9.53	7.81	5.92	22.9	8.46		YAL040C	8.11	3.5	2.98	9.48	15.97	11.9	5.14	4.38	28.94	2.68	16.14	5.52	2.28	12.03	0	9.82	6.61	0	2.12	7.67	0	3.95	9.62
YAL041W	24.84	15.62	15.64	24.45	25.5	24.64	29.23	26.62	28.14	25.88	23.83	19.79	27.79	24.41	22.36	30.76	28.69	29.42	37.82	32.21	21.55	36.3	39.67	20.36		YAL041W	5.29	2.68	2.74	4.17	6.62	4.85	5.37	2.86	0	3.5	7.31	3.83	1.99	6.09	1.11	3.65	2.16	0	1.15	5.46	3.2	2.77	6.9
YAL042C-A	41.91	13.08	4.88	62.63	74.38	35.79	53.22	42.73	56.97	65.59	77.88	40.63	16.62	52.53	33.71	33.35	29.56	14.36	63.1	48.06	19.82	52.3	79.92	38.62		YAL042C-A	0	12.89	11.74	15.78	14.9	9.91	0	0	0	0	11.51	20.65	0	14.83	0	6.95	0	0	5.8	10.27	69.8	10.18	15.57
YAL042W	93.07	40.41	25.63	69.24	75.93	47.09	69.94	79.63	73.93	71.14	104.61	78.08	39.77	63.66	59.43	51	62.98	42.52	102.14	65.96	32.67	50.89	117	46.73		YAL042W	32.92	21.78	12.67	45.36	40.67	21.96	42.99	0	10.65	26.85	63.17	32.77	5.6	52.39	0.83	28.65	14.6	17.06	5.24	43.64	31.43	18.76	34.85
YAL043C	15.61	6.31	3.12	10.53	11.42	5.1	13.11	12.18	9.81	9.68	11.73	8.26	7.56	9.54	7.45	8.28	8.26	5.39	19.05	9.62	7.87	8.18	25.07	5.86		YAL043C	5.6	7.4	3.47	9.15	13.28	5.64	7.06	3.13	0	4.61	12.22	5.61	1.36	8.78	0	5.36	0	12.44	1.26	8.97	3.51	6.29	8.71
YAL044C	117.79	68.13	80.36	53.01	56.8	54.72	88.22	90.69	68.14	70.55	47.71	40.24	113.59	52.67	81.36	143.49	115	113.74	326.07	138.1	108.23	195.95	169.39	167.73		YAL044C	92.12	71.86	68.37	150.75	59.44	49.02	79.91	0	0	34.3	37.35	31.37	13.09	21.73	2.78	27.52	16.26	57.01	8.67	65.11	0	26.22	54.38
YAL044W-A	54.05	14.51	51.14	29.66	19	37.28	41.58	50.23	33.39	23.5	43.33	24.14	17.44	58.78	38.67	24.66	24.65	52.2	61.65	30.73	3.16	30.05	52.53	23.93		YAL044W-A	51.55	44.24	39.44	58.45	49.74	42.86	43.58	0	0	24.73	59.08	41.57	6.16	36.77	0	46.23	0	0	0	58.86	0	23.97	28.51
YAL045C	14.75	0	21.81	33.99	56.2	17.34	50.44	13.5	32.02	36.99	23.99	20.14	33.44	7.26	7.54	13.07	9.53	13.42	15.47	34.24	26.05	29.85	29.87	19.1		YAL045C	0	3.8	6.64	0	0	0	10.43	0	0	0	0	2.61	8.52	0	0	0	0	0	0	4.1	0	2.69	3.51
YAL046C	19.24	0	10.65	21.84	7.2	7.44	25.59	6.93	6.84	22.05	20.69	17.25	8.16	15.44	11.41	18.47	11.01	13.67	38.53	13.31	13.88	3.86	19.8	2.58		YAL046C	40.99	32.73	26.5	56.04	27.42	13.09	44.22	0	0	15.73	33.41	15.17	11.15	40.78	5.53	28.89	32.32	113.3	0	32.35	0	11.58	29.76
YAL047C	12.29	5.82	11.08	16.17	15.45	13.98	21.43	18.69	17.99	22.36	16.96	15.72	23.93	19.81	19.71	20.54	22.14	17.8	25.3	19.04	15.43	33.56	17.05	16.13		YAL047C	1.29	0.56	1.17	1.63	1	0.55	1.14	0	0	1.49	1.58	1.2	1.06	2.27	0	0.88	0	0	0.33	1.61	0	0.55	1.63
YAL047W-A	6.75	14.85	5.82	4.63	5.57	1.13	2	8.05	8.1	1.9	3.12	0.83	9.52	8.12	14.42	12.28	6.64	11.63	16.96	3.82	20.01	12.86	16.03	0		YAL047W-A	0.68	0	1.31	0	7.09	1.91	0	0	0	0	0	2.27	0	2.97	0	0	0	0	1.69	2.05	0	1.45	0
YAL048C	9.7	0	2.39	4.08	4.04	2.87	6.29	5.07	4.24	5.7	5.25	3.12	6.99	2.28	5.24	6.44	6.08	4.16	13.91	5.3	5.89	6.21	8.27	5.25		YAL048C	0.92	1.84	0.86	1.9	2.27	0.89	1.24	3.78	0	0.46	1.64	1.69	0.33	1.9	0	2.28	0	5	0.79	2.4	0	1	1.24
YAL049C	89.74	32.29	45	68.54	63.01	75.33	72.37	83.36	44.26	61.99	44.23	44.33	39.64	90.04	62.66	56.88	56.19	67.73	81.69	63.52	32.36	86.54	78.51	61.01		YAL049C	16.73	11.71	10.45	26.39	15.37	19.5	25.78	12.47	20.61	21.4	33.54	20.14	6.5	23.08	1.61	23.16	0	33.03	6.03	19.85	0	11.53	19.18
YAL051W	13.59	7.26	5.43	9.03	8.63	5.98	11.88	10.23	8.81	9.97	8.88	6.48	6.13	8.75	7.76	11.15	7.83	7.45	16.41	9.55	8	7.45	18.7	5.13		YAL051W	2.93	2.08	1.52	3.12	3.39	2.03	2.7	2.3	0	3.38	4.18	1.85	0	2.83	0	3.43	1.73	0	0.55	3.38	2.57	1.61	4.2
YAL053W	17.77	11.74	8.2	10.37	14.45	9.28	13.15	15.77	14.25	11.79	14.42	10.47	6.99	10.58	12.77	11.27	9.3	10.49	22.11	14.4	13.24	10.19	21.07	7.4		YAL053W	13.64	7.97	7.18	8.38	15.17	9.18	14.46	12.56	0	7.31	22.88	10.57	3.27	14.26	0.41	9.39	2.37	12.47	1.01	15.74	3.52	9.21	13.56
YAL054C	6.39	6.01	1.3	4.49	2.93	3.63	4.37	4.51	2.78	6.15	3.79	3.06	3.54	4.6	4.95	5.07	3.58	3.08	8.74	5.41	7.9	5.02	4.51	3.99		YAL054C	0.44	0.24	0.27	0.53	0.86	2.48	0.16	0	0	0.43	2.11	2.6	0	2.73	0	0.08	0	0	0	0.28	0	0.47	0.25
YAL055W	88.37	45.23	44.01	60.19	71.7	33.3	99.92	52.54	52.15	94.06	52.26	27.36	41.22	51.23	35.82	51.44	69.56	46.36	90.09	47.37	49.4	69.06	122.77	49.85		YAL055W	2.51	1.37	5.31	5.94	5.81	0.67	2.77	0	0	4.82	1.7	1.55	0	2.2	0	4.27	0	26.02	0	6.26	0	0.89	2.16
YAL056C-A	21.95	11.22	32.16	22.03	18.77	22.74	22.17	18.25	26.48	20.32	30.05	33.2	21	18.5	27.7	43.73	37.79	31.59	53.41	26.27	31.91	29.91	26.54	14.12		YAL056C-A	2.84	3.03	0.29	10.32	6.03	4.53	5.57	0	0	0	7.41	6.88	0	13.95	0	4.11	0	0	7.17	5.89	0	3.01	7.82
YAL056W	68.1	38.99	51.96	43.11	51.39	53.3	49.22	49.19	41.65	48.07	39.79	32.94	35.87	47.26	41.38	37.17	37.74	47.03	56.23	50.65	35.66	47.61	50.31	41.43		YAL056W	2.3	2.12	2.34	4.88	5.59	3.29	1.95	0	0	0.34	3.84	2.29	0.96	1.86	0.36	3.07	0	0	0.45	3.96	0	2.5	4.35
YAL058W	13.12	4.64	2.05	6.59	13.75	6.44	7.77	8.54	10.79	7.33	11.07	7.12	2.48	5.3	6.08	6.2	3.59	4.2	11.83	10.59	10.52	4.9	14.59	4.59		YAL058W	1.32	1.62	1.59	2.96	5.15	2.98	5.17	0	0	2.53	4.96	2.15	0.45	3.01	0.67	2.88	3.9	0	0	4.25	0	2.33	1.55
YAL059C-A	8.2	0	0	0	0	4.6	0	4.02	7.88	0	0	3.81	0	0	0	0	0	2.1	0	3.02	0	0	0	0		YAL059C-A	0	0	0.9	0	0	0	0	0	0	3.7	0	0	0	0	0	0	0	0	0	0	0	0	0
YAL059W	410.35	702.78	548.6	425.85	659.72	631.17	198.97	483.99	509.3	207.6	357.84	291.39	409.2	245.85	242.15	215.58	243.25	202.03	156.81	317.42	175.65	321.2	203.36	262.59		YAL059W	10.79	33.12	37.74	2.32	65.9	43.86	5.77	61.46	0	0	29.99	22.69	4	18.09	3.97	3.7	0	0	2.48	12.84	17.22	22.53	12.94
YAL060W	33.6	22.52	11.51	30.56	13.18	13.76	44.27	26.23	13.2	34.06	25.23	17.47	10.4	32.25	22.46	22.85	22.44	22.21	60.59	23.79	20.19	9.62	33.92	17.19		YAL060W	15.91	1.73	1.74	30.11	5.61	1.93	13.71	0	0	16.57	10.19	7.85	9.89	13.57	1.84	30.37	0	18.84	3.44	9.34	0	1.61	10.94
YAL061W	87.4	31.34	60.59	88.32	35.97	20.05	130.9	73.97	36.06	100.26	50.87	40.86	17.92	88.4	42.45	66.74	58.97	53.06	76.24	31.14	18.7	20.79	55.46	30.57		YAL061W	12.28	11.36	11.35	25.82	27.17	13.94	13.85	6.41	10.59	20.42	18.9	11.36	9.46	31.98	0	59.18	4.84	0	8.26	6.63	14.36	13.88	9.62
YAL062W	36.22	26.48	10.02	13.48	20.99	18.12	13.77	18.88	16	16.73	16.92	14.55	8.05	9	6.01	8.22	8.89	5.65	19.31	7.16	7	6.22	15.98	5.56		YAL062W	2.2	60.34	44.32	2.04	55.31	51.4	1.36	17.26	0	3.53	47.21	42.57	1.5	37.42	3.72	11.97	13.04	0	7.88	1.61	6.45	33.06	1.27
YAL063C-A	27.5	21.11	9.13	24.24	24.72	19.13	17.56	17.84	14.08	21.62	17.74	24.21	37.32	20.6	34.26	33.67	14.17	32.46	50.07	34.24	11.9	13.23	16.98	4.43		YAL063C-A	0	0	0	0	0	0	0	0	0	0	0	0	0	0	0	0	0	0	0	0	0	0	0
YAL063C	9.14	5.47	6.08	3.16	7.48	4	5.97	4.73	8.27	5.89	5.58	2.72	4.91	3.98	3.39	6.95	6.04	5.42	14.56	8.3	12.98	8.98	7.94	3.66		YAL063C	0.11	0	0.26	0.11	0	0	0	0	0	0	0.26	0.13	0	0.16	0	0.11	0	0	0	0.1	0	0	0
YAL064C-A	5.57	0	9.24	1.12	2.08	2.42	2.22	0	5.44	1.37	1.5	0	0	1.49	3.3	3.54	4.78	2.74	11.05	4.95	12.05	13.39	1.72	4.49		YAL064C-A	0	0	0	0	0	0	0	0	0	0	0	0	0	0	0	0	0	0	0	0	0	0	0
YAL064W-B	22.1	0	0	4.32	8.72	2.21	5.52	2.8	10.64	14	12.73	3.12	0	1.99	1.3	7.51	9.64	12.46	15.1	18.05	23.3	5.21	9.56	0.66		YAL064W-B	0	0	0	5.3	0	0	0	0	0	0	0	0	0	0	0	0.35	0	0	0	0	0	0	0
YAL064W	23.48	0	19.49	14.11	8.79	5.1	11.71	6.34	20.03	14.42	3.16	0	9.96	0	3.48	29.58	15.12	9.62	21.37	18.27	25.4	14.11	0	0		YAL064W	0	0	0	0	0	0	0	0	0	0	0	0	0	0	0	0	0	0	0	0	0	0	0
YAL065C	2.92	0	0	2.4	0	0	1.6	0	0	0	2.9	1.76	3.24	0	0	7.02	0	3.35	4.86	8.4	3.05	10.07	4.79	0		YAL065C	0	0	0	1.7	1.48	0.87	0	0	0	0	1.26	0	0	0	0	0.66	0	0	0	0	0	2.43	0
YAL066W	0	0	0	0	0	1.34	1.84	0	0	0	0	4.5	0	4.93	1.37	3.32	7.91	1.51	16.77	7.17	4.98	0	0	7.42		YAL066W	0	0	0	0	0	0	0	0	0	0	0	0	0	0	0	0	0	0	0	0	0	0	0
YAL067C	6.24	4.91	0.53	1.8	1.44	1.95	2.68	2.77	4.1	1.89	1.55	0.94	1.36	1.88	2.09	3.46	3.85	2.73	9.67	2.82	6.23	4.23	3.16	1.81		YAL067C	0	0.15	0.11	0.22	0	0	0.2	0	0	0	0.19	0.17	0	0	0	0	0	0	0	0	0	0.1	0
YAL067W-A	0	0	0	0	9.88	0	0	0	6.98	0	0	6.33	0	0	0	9.55	0	4.34	13.41	13.76	0	0	0	0		YAL067W-A	0	0	0	0	0	0	0	0	0	0	0	0	0	0	0	0	0	0	0	0	0	0	0
YAL068C	10.13	0	0	4.64	4.64	2.81	3.14	5.27	0	5.45	10.64	0	0	0	0	6.62	6.4	0	11.19	11.5	29	22.46	3.35	3.54		YAL068C	0.01	0	0	0	0	0	0.19	0	0	0	0	0	0	0	0	0	0	0	0	0.15	0	0	0.22
YAL068W-A	4.25	32.67	27	9.67	0	2.47	3.4	0	3.63	7.53	0	0	0	4.55	0	15.33	0	0	38.36	0	9.2	0	0	0		YAL068W-A	0	0	0	0	0	0	0	0	0	0	0	0	0	0	0	0	0	0	0	0	0	0	0
YAL069W	69.16	16.8	21.75	3.51	19.73	1.4	11.56	0	38.86	15.86	14.24	2.19	26.06	0	2.77	39.9	28.57	10.44	52.09	27.79	45.67	62.74	21.98	17.85		YAL069W	0	0	0	0	0	0	0	0	0	0	0	0	0	0	0	0	0	0	0	0	0	0	0
YAR002C-A	128.58	59.06	85.75	124.62	92.19	76.46	133.33	96.22	90.48	149.55	130	112.31	94.14	147.03	111.81	101.69	111.36	119.27	131.66	115.73	71.34	107.04	146.59	85.9		YAR002C-A	69.3	37.73	31.98	104.16	65.79	36.38	101.28	29.33	0	84.47	104.32	60.93	17.84	87.16	7.59	51.27	22.15	58.25	15.36	76.44	16.44	27.12	60.12
YAR002W	54.37	20.53	21.9	31	45.93	33.49	35.71	36.03	34.37	33.63	35.08	28.94	32.36	32.43	25.38	38.9	33.68	30.74	41.93	39.95	27	33.01	60.11	25.28		YAR002W	5.16	15.88	8.09	10.78	16.42	9.7	10.73	14.27	23.58	6.41	13.21	8.06	1.24	7.74	1.85	4.93	3.59	6.3	3.07	10.98	0	7.51	13.06
YAR003W	103.25	55.72	39.64	95.12	85.92	73.3	103.9	90.85	83.9	104.43	104.73	79.45	73.07	102.98	75.14	63.05	73.58	60.79	75.02	75.3	46.61	106.97	69.98	56.98		YAR003W	7.18	2.39	1.69	5.98	8.01	4.03	4.4	0	0	2.3	8.67	6.4	1.09	4.9	0	2.86	9.44	0	0	6.46	0	1.69	4.12
YAR007C	30.7	5.83	8.58	28.86	14.34	14.8	26.68	24.64	12.97	21.2	24.18	24.07	6.96	29.44	22.72	13.68	9.4	14.25	23.57	16.71	8.88	10.23	16.7	7.84		YAR007C	8.29	4.93	3.11	10.21	7.4	4.55	9.91	0	6.7	11.93	30.43	21.32	6.34	30.24	2.62	12.62	21.44	5.37	1.31	10.17	9.09	3.11	11.28
YAR008W	75.71	49.47	41.45	143.62	104.36	69.81	164.26	201.56	111.33	184.79	222.6	202.43	127.07	231.89	186.11	103.82	96.14	90.84	116.14	157.52	61	145.27	99.48	131.76		YAR008W	5.49	1.87	0.56	3.79	3.71	1.46	2.52	0	0	2.63	11.19	4.66	2.8	10.85	1.39	2.85	0	14.23	0	3.42	0	0.73	2.36
YAR014C	49.06	16.11	24.39	28.6	45.79	31.03	27.75	29.5	41.41	29.26	28.07	23.73	26.93	25.27	22.49	25.6	25.69	22.19	36.69	28.99	21.29	38.17	38.72	22.62		YAR014C	3.58	1.83	2.32	3.7	15.19	5.83	4.77	3.5	0	3.43	9.11	5.24	1.83	6.67	0.91	2.87	2.64	0	1.41	5.02	3.92	5.45	3.97
YAR015W	57.54	13.47	19.8	19.12	27.85	13.22	16.8	26.55	31.73	32.06	15.47	15.1	22.02	21.78	24.98	37.39	18.08	22.09	127.24	45.86	25.81	30.37	69.77	28.27		YAR015W	63.38	24.09	25.98	139.62	68.78	20.68	46.19	9.36	0	16.07	22.34	17.33	4.88	33.08	0	11.29	21.22	12.4	3.77	55.89	41.98	28.93	46.27
YAR018C	3.43	0	2.28	2.56	4.79	3.05	6.56	8.15	6.63	18.4	15.47	10.05	26.74	19.56	12.33	28.62	34.52	36.4	44.58	27.73	31.63	32.41	66.3	26.87		YAR018C	3.89	0	0	4.91	0.9	0.41	2.29	0	0	0.75	2.38	0.48	0.53	1.37	0	0	0	0	0.49	2.43	0	0	7.59
YAR019C	7.71	3.57	3.71	4.69	4.32	4.04	6.01	4.82	4.68	4.99	5.99	3	3.78	4.57	2.91	7.09	5.56	4.39	12.09	5.79	8.45	5.81	7.92	3.59		YAR019C	1.11	0.95	0.84	2.12	2.2	1.1	1.28	0	0	0.91	2.15	1.61	0	2.36	0	1.97	1.87	0	0.2	1.77	0	1.17	1.45
YAR019W-A	34.01	14.51	12.39	4.54	0	4.41	4.53	2.12	1.62	11.77	2.05	1.85	3.21	0	4.63	6.82	16.81	3.72	22.44	7.73	20.39	18.18	14.01	0		YAR019W-A	0	0	1.82	0	0	0	0	0	0	0	0	0	0	5.66	0	1.27	0	0	0	2.15	0	0	0
YAR020C	26.63	0	0	21.34	0	0	0	0	46.12	26.17	0	26.04	0	0	15.8	38.33	0	17.44	78.05	0	57.81	0	32.89	42.92		YAR020C	0	0	0	0	0	0	0	0	0	0	0	0	0	0	0	0	0	0	0	0	0	0	0
YAR023C	31.2	17.11	12.33	16.07	8.9	11.63	19.57	20.08	12.68	28.47	8.79	10.17	15.12	19.88	27.76	27.82	21.69	21.92	28.67	26.97	8.04	17.86	14.68	17.96		YAR023C	1.27	0	0.35	0	0	0	0.93	0	0	0	0.86	1.95	0	0	0	0	0	0	0	0	0	0	0
YAR027W	103.52	42.03	85.92	193.78	69.33	125.46	222.34	195.28	106.58	157.94	159.48	117.29	104.68	226.37	186	166.49	187.19	206.57	181.94	183.81	100.15	123.27	127.85	117.1		YAR027W	11.03	4.16	7.59	13.38	9.82	4.97	11.23	13.28	0	8.14	14.4	9.94	2.31	15.77	3.44	19.27	0	0	4.28	14.82	0	5.09	17.8
YAR028W	32.04	19.22	24.93	64.19	20.25	30.24	107.99	68.19	36.73	92.97	81.83	52.87	84.93	110.91	85.53	131.38	146.17	155.93	90.42	111.15	66.08	104.74	73.58	78.26		YAR028W	10.24	1.39	3.41	10.77	0.66	1.36	10.67	0	0	13.1	16.23	6.05	3.48	11.11	0	7.35	0	0	1.08	13.8	44.92	2.41	11.44
YAR029W	81.87	104.75	135.9	114.81	40.88	102.83	217.8	191.73	81.49	214.49	95.37	146.77	208.3	277.45	259.01	186.68	175.75	335.51	208.66	247.72	88.57	229.68	244.35	142.93		YAR029W	0	0	4.76	9.17	8.98	0	0	0	0	0	0	0	0	0	0	0	0	0	0	0	0	0	6.66
YAR030C	60.23	27.2	82.34	110.73	82.26	80.11	189.45	151.27	129.98	234.97	175.25	142.05	225.36	301.43	170.2	276.78	337.71	265.98	162.55	227.89	176.32	383.4	301.93	194.14		YAR030C	0	0	0	0	0	0	0	0	0	0	0	0	0	0	0	0	0	0	0	0	0	0	0
YAR031W	7.87	0	8.88	6.67	5.58	2.73	7.76	6.66	4.35	10.14	7.98	5.68	8.92	6.22	8.34	14.2	9.63	8.42	23.63	9.83	10.06	10.85	18.13	5.39		YAR031W	3.07	1.17	0.38	4.72	0.78	0	3.65	0	0	2.21	2.78	0.55	0	1.47	0	1.67	0	0	1.56	1.58	0	0.52	0
YAR033W	41.12	17.95	38.78	36.09	15.06	27.5	39.44	50.05	30.75	44.25	37.29	29.83	39.96	59.71	50.42	57.47	43.47	59.4	53.82	52.93	34.04	54.81	29.88	29.65		YAR033W	5.12	4.55	4.07	2.69	7.25	1.14	3.14	0	0	1.64	9.27	5.53	0	7.49	0	5.15	0	0	0	5.32	0	2.57	4.08
YAR035C-A	0	0	0	0	0	0	0	0	0	0	0	0	0	0	0	0	0	0	0	0	0	0	0	0		YAR035C-A	0	0	0	0	0	0	0	0	0	0	0	0	0	0	0	0	0	0	0	0	0	0	0
YAR035W	3.12	3.13	2.71	1.63	2.64	1.57	1.84	1.91	4.75	6.01	2.34	1.46	2.3	1.89	2.5	1.76	1.4	0.98	9.89	3.38	9.41	1.96	3.86	2.41		YAR035W	0.69	1.39	1.23	0.55	1.79	2.96	1.36	0	0	0.89	0.16	1	0	0.61	0	0.7	0	0	0.29	0.72	0	1.14	1.33
YAR042W	10.38	8.08	5.74	7.17	6.31	4.62	11.95	8.29	8.79	12.04	10.6	5.88	4.98	6.36	7.94	8.56	8.91	5.97	21.91	12.48	14.97	9.77	19.23	6.06		YAR042W	3.85	2.16	2.52	5.86	2.87	1.71	4.81	0	0	2.71	5.92	2.73	1.4	5.51	0.26	5.47	4.55	5.31	1.29	5.67	2.25	1.77	6.91
YAR047C	20.76	0	0	4.99	3.11	4.82	3.31	8.98	3.54	4.08	2.23	2.03	3.52	2.22	3.7	4.49	3.57	5.45	15.12	4.31	17.97	4.99	12.82	3.35		YAR047C	0	0	0	0	0	0	0	0	0	0	0	0	0	0	0	0	0	0	0	0	0	0	0
YAR050W	3.81	0	2.34	1.73	2.34	1.12	2.23	1.88	3.81	2.73	1.7	1.23	1.56	2.01	1.89	3.19	2.99	1.8	6.73	3.91	6.22	4.45	3.82	2.68		YAR050W	0	0	0.12	0	0.24	0.12	0	0	0	0	0	0.04	0	0.12	0	0.09	0	0	0	0.16	0	0	0
YAR053W	38.77	79.37	8.58	70.42	100.66	61.44	92.83	100.58	116.88	101.58	102.84	70.77	179.76	130.01	92	102.37	88.78	89.83	156.23	99.22	67.11	186.47	63.85	37.49		YAR053W	8.81	0	3.61	0	0	0	3.24	0	0	8.45	0	0	0	7.74	0	1.66	0	0	0	0	0	0	0
YAR060C	6.47	0	3.07	3.7	2.77	4.29	4.43	1	3.16	3.63	1.99	1.81	3.14	2.97	4.94	10.65	3.18	6.06	12.12	5.75	2	6.67	4.57	0		YAR060C	0	0	0	0	0	0	0	0	0	0	0	0	0	0	0	0	0	0	0	0	0	0	0
YAR064W	5.02	0	16.65	6.03	22.54	0	8.01	5.42	17.12	9.86	0	2.45	0	2.68	1.49	14.45	17.23	4.93	19	18.21	16.28	18.09	4.75	4.04		YAR064W	0	0	0	0	0	0	0	0	0	0	0	0	0	0	0	0	0	0	0	0	0	0	0
YAR066W	13.09	0	3.05	2.21	7.35	0	3.43	4.97	6.28	9.64	15.83	1.2	5.2	5.25	6.55	3.83	14.75	6.03	7.59	6.05	7.3	7.38	5.3	1.48		YAR066W	1.05	0	0	0	0	0	0.38	0	0	0	0	0	0.71	0	0	0	0	0	0	1.3	0	0.18	0.81
YAR068W	17.05	4.41	0	3.66	5.44	3.46	0	3.66	0	0	9.78	9.93	0	4.78	9.2	6.26	4.85	6.3	29.56	0	20.79	4.31	0	1.44		YAR068W	0.85	1.86	0.22	1.39	0	0	3.05	0	0	0	0	0	1.06	0	0	0.31	0	0	0	1.11	0	0	0.49
YAR069C	5.33	20.46	22.12	2.14	17.97	4.64	3.19	5.76	11.37	9.17	8.6	2.61	0	14.26	1.58	7.68	6.87	13.98	27.17	30.42	25.95	19.23	9.88	4.3		YAR069C	0	0	0	0	0	0	0	0	0	0	0	0	0	0	0	0	0	0	0	0	0	0	0
YAR070C	7.02	9.63	0	3.01	3.76	13.07	8.01	0	7.13	0	10.79	1.23	17.02	8.05	5.21	10.84	0	10.85	13.15	13.88	5.43	0	0	12.13		YAR070C	0	0	0	0	0	0	0	0	0	0	0	0	0	0	0	0	0	0	0	0	0	0.75	0
YAR071W	22	7.34	6.2	19.01	12.63	19.42	12.12	22.34	8.39	5.84	18.33	15.07	14.11	18.61	9.11	10.77	6.81	10.19	8.78	5.47	5.23	3.51	6.21	3.53		YAR071W	0	8.22	13.16	2.82	19.11	21.48	3.31	22.92	0	6.75	31.53	30.16	1.22	27.89	3.08	0	6.58	7.96	5.75	9.4	3.14	9.6	16.8
YAR073W	1.45	0	2.15	0.89	2.04	0.72	1.48	0.87	2.5	4.2	1.85	0.78	0.66	0.95	0.71	4.04	3.24	1.4	8.48	3.38	5.53	7.19	2.76	0.66		YAR073W	0	0.39	0	0.85	0	0.35	0	6.67	0	0	0	0.56	0.73	0	0	0	0	0	0	0.57	0	0	0.5
YAR075W	19.47	8.8	7.36	0	3.28	1.33	1.27	0	12.58	6.43	9.63	4.39	10.07	0	2.95	7	7.49	1.6	13.26	10.51	13.18	5.59	5.89	1.52		YAR075W	0	1.19	0	0	0	0	0	24.59	0	0	4.64	0	0	0	0	0	0	0	3.01	0	0	0	0
YBL001C	1567.98	1928.03	1819.88	1771.06	1815.46	1326.83	3445.92	2485.67	2131.5	2525.4	1808.21	1631.56	1681.79	2290.46	2720.5	1765.95	2269.13	1768.47	1673.04	2154.59	2235.08	2079.61	1656.05	2498.85		YBL001C	133.98	79.02	59.99	199.63	129.29	63.38	183.45	58.28	0	157.13	194.64	75.74	65.82	166.65	15.07	168.64	88.03	0	28.17	162.33	0	55.21	162.14
YBL002W	43.73	29.64	21.35	43.29	28.9	20.29	89.46	111.23	52.93	222.74	109.25	108.09	212.09	170.69	247.81	260.54	231.11	357.3	307.51	182.79	111.31	179.4	192.21	93.28		YBL002W	360.35	22.01	9.5	412.53	13.71	10.65	388.24	0	56.71	470.76	218.95	96.7	80.48	176.65	4.44	61.8	190.97	227.17	8.99	435.78	115.38	10.63	259.22
YBL003C	44.66	44.46	37.02	96.28	33.12	48.42	407.36	495	153.38	1276.18	680.6	514.59	1473.95	994.88	1225.23	1169.81	1040.95	1324.62	984.84	1158.29	685.73	1012.87	498.59	487.74		YBL003C	340.12	4.13	3.83	369.47	2.09	1.6	344.31	126.77	0	490.97	251.09	155.65	106.46	205.89	12.24	66.84	120.35	149.17	8.47	367.64	206.64	8.96	234.05
YBL004W	54.37	31.24	27.48	32.38	54.6	44.33	16.71	32.77	50.12	17.13	27.83	27.03	24.43	23.71	15.06	31.11	28.2	25.34	21.83	28.25	17.39	32.79	28.2	19.73		YBL004W	4.62	9.62	7.34	4.72	21.05	9.12	6.67	7.43	0	4.21	20.09	16.8	1.29	15.25	0.84	3.07	6.31	0	3.44	6.83	2.08	9.74	8.12
YBL005W	19.38	4.98	7.08	8.32	12.78	9.89	8.21	11.03	11.47	12.85	8.18	7.25	8.18	9.43	8.03	9.95	7.8	7.6	18.77	9.43	8.83	10.26	13.17	4.48		YBL005W	2.05	0.6	0.41	1.12	2.32	0.25	1.28	0	12.27	1.21	1.72	1.27	0.21	0.97	0	1.37	0	0	0.4	1.38	0	0.45	0.91
YBL006C	106.04	56.53	44.01	74.19	79.42	63.61	90.22	122.58	90.47	125.89	136.2	84.98	105.83	76.27	91.3	72.65	84.74	70.98	133.53	87.46	71.7	111.56	85.49	77.14		YBL006C	12.55	25.96	22.08	29.7	30.03	15.96	31.39	0	0	12.36	31.54	17.03	1.71	21.66	5.08	17.06	14.84	26.02	4.75	23.46	0	11.08	19.42
YBL006W-A	0	0	0	53.59	0	0	20.55	0	0	0	0	0	24.98	124.21	0	0	0	0	0	27.98	0	0	0	0		YBL006W-A	0	0	14.71	0	0	99.35	0	0	0	148.24	0	0	0	182.82	0	0	0	0	0	0	4676.53	0	0
YBL007C	14.83	8.8	6.66	14.18	15.56	8.76	21.38	16.26	12.35	18.23	18.8	14.08	10.94	17.71	12.92	18.88	15.75	10.99	31.93	17.99	11.32	16.02	26.63	10.39		YBL007C	20.02	5.38	5.1	23.69	11.22	6.17	20.21	7.65	3.16	10.08	28.69	14.31	5.15	27.34	0.49	17.01	10.11	22.78	1.39	26.17	2.14	4.61	25.61
YBL008W-A	10.62	0	0	4.26	0	0	12.71	5.74	18.12	10.43	11.42	0	9.01	0	0	0	9.12	10.45	19.34	0	11.49	0	0	0		YBL008W-A	0	0	0	0	0	0	0	0	0	0	0	0	0	0	0	0	0	0	0	0	0	0	0
YBL008W	8.94	0.84	1.09	4.8	5.55	3.85	3.92	5.66	6.42	6.1	5.16	3.41	3.7	3.73	4.27	5.73	2.81	2.57	11.27	4.75	6.84	4.19	9.56	3.16		YBL008W	0.93	1.62	1.29	2.2	3.59	0.89	2.73	0	0	0.36	3.41	2.58	0.76	1.63	0.38	1.33	4.39	3.85	0.7	2.2	0	1.44	2.02
YBL009W	8.57	1.06	4.59	4.76	6.01	3.29	7.06	8.22	6.02	10.73	8.48	6.36	7.27	8.44	11.89	12.55	8.55	9.25	16.72	11.91	9.28	9.98	11.78	4.23		YBL009W	3.77	1.92	0.74	4.65	2.91	1.5	3.47	0	0	0.9	5.92	4.14	0.64	4.76	0	1.51	0	0	0.59	7.93	0	1.25	5.94
YBL010C	49.56	9.06	13.06	32.47	17.09	18.47	44.58	28.06	22.15	45.22	30.46	26.93	22.02	22.31	28.47	20.11	28.37	22.96	36.95	23.67	20.43	17.03	36.92	17.75		YBL010C	2.68	4.01	1.83	3.7	2.07	2.14	2.96	0	0	3.86	6.37	3.51	0	4.71	0	2.78	0	13.9	0.85	5.43	0	0.47	4.23
YBL011W	86.37	91.12	38.8	25.58	115.61	19.93	53.09	30.04	89.55	51.14	50.3	34.83	41.99	18.3	10.09	34.25	104.52	12.08	24.91	21.02	62.67	86.31	71.52	52.77		YBL011W	5.39	4.52	3.32	5.31	11.83	5.74	5.95	0	16.1	4.38	11.4	4.74	1.28	4.69	0.66	4.07	0	4.3	1.05	5.17	3.64	3.52	4.61
YBL012C	8.02	0	0	11.8	19.46	9.99	11.5	9.07	9.97	16.48	17.11	11.44	6.35	10.04	5.38	11.02	6.43	5.5	24.51	20.14	2.9	12.44	6.42	0		YBL012C	0	3.41	4	2.65	10.12	0	0	0	0	0	1.54	3.22	1.34	7.96	6.13	0	0	0	0	0	0	0	2.72
YBL013W	3.02	0	0.84	1.81	1.13	0.73	3.01	0.82	1.72	1.73	1.62	0.74	1.28	1.35	0.75	2.17	1.73	0.82	6.96	2.35	4.35	3.63	2.17	2.03		YBL013W	2.14	0.47	1.58	3.38	2.98	1.83	1.89	0	0	2.47	4.37	1.59	0.58	3.76	0	2.91	0	0	0	2.94	0	1.67	2.46
YBL014C	12.64	5.48	3.72	9.23	11.6	8.15	8.54	10.9	13.21	14.02	10.63	8.77	8.47	5.89	6.47	10.13	8.23	7.95	16.85	9.3	7.28	11.76	15.48	7.55		YBL014C	1.22	0.85	0.55	0.68	4.96	2.5	1.15	2.72	0	2	3.42	2.09	0	0.3	0	0.52	0	0	0.44	1.84	0	1.35	1.49
YBL015W	11.36	2.81	6.69	12.78	7.96	9.25	25.75	17.44	6.41	18.37	13.4	10.04	8.4	14.91	12.07	13.6	13.85	12.38	31.9	12.74	11.5	13.66	14.49	11.82		YBL015W	11.87	2.04	3.16	20.95	5.31	5.32	16.55	9.78	0	10.19	19.31	13	8.93	17.83	0	34.21	7.39	6.48	2.36	15.18	5.48	5.41	17.91
YBL016W	11.15	4.51	3.9	4.47	4.4	2.72	3.05	2.86	5.51	3.75	3.79	1.15	2.49	1.26	1.74	5.07	1.51	1.92	9.41	2.74	4.45	7.06	5.08	2.37		YBL016W	0.5	0.54	0.96	0.39	0.77	0.53	0	0	0	0	0	0.46	0	0	0	0	0	0	0	0	0	0.35	0
YBL017C	18.91	6.42	10	16.23	13.95	12.65	19.19	19.66	16.09	21.43	19.38	14.46	12.11	19.76	16.02	18.76	17.15	18.1	32.09	18.87	14.36	18.78	26.23	14.03		YBL017C	7.7	2.89	2.74	11.77	7.18	4.19	9.44	2.98	0	6.75	12.83	8.25	1.81	11.18	0	7.18	3.37	7.88	1.2	11.66	5.01	3.31	13.28
YBL018C	66.14	143.7	33.15	69	87.85	96.22	43.82	114.66	55.36	61.3	100.64	98.85	112.19	120.2	131.77	106.93	85.73	96.55	134.5	137.23	72.91	96.03	78.6	40.22		YBL018C	17	8.1	6.1	16.78	21.34	6.79	17.21	0	0	8.16	17.33	20.33	2.89	22.41	0	4.82	0	0	0	22.53	37.32	9.01	17.07
YBL019W	31.57	7.13	19.12	17.56	9.18	12.6	24.01	17.06	9.98	19.52	16.78	9.44	11.97	16.9	15.42	16.05	11.8	17.29	21.91	11.75	13.26	12.06	13.53	8.08		YBL019W	0.63	1.21	1.77	2.25	2.44	1.35	2.1	0	0	3.04	3.87	1.76	0.86	1.67	0	2.75	0	0	0	1.18	0	1.34	0.73
YBL020W	31.21	5.1	7.16	19.95	19.64	13.57	18.42	21.71	16	22.02	23.38	18.18	14.08	20.61	15.85	14.82	14.26	16	25.87	18.43	16.88	19.96	26.65	8.56		YBL020W	6.79	0.77	1.82	7.59	8.08	2.86	6.87	4.43	0	6.52	15.76	9.51	1.15	8.69	0	4.59	3.35	5.87	1.43	9.52	0	4	6.81
YBL021C	242.59	49.44	71.28	116.99	96.47	94.59	125.08	84.7	87	85.43	62.33	53.53	100.14	71.23	71.32	78.07	90.33	64.05	96.93	71.27	62.71	92.93	87.5	51.9		YBL021C	12.81	18.92	10.25	7.22	9.89	5.84	10.77	0	47.33	0	12.42	2.82	0	6.42	0	10.36	0	0	2.31	15.96	0	9.69	13.63
YBL022C	26.81	10.32	3.94	18.89	19.31	16.14	17.74	19.66	14.17	12.36	17.35	14.15	8.45	16.17	10.13	14.81	9.64	9.28	26.61	12.64	8.56	12.74	19.24	7.01		YBL022C	7.95	3.67	3.57	8.72	13.84	7.39	8.33	4.22	3.49	5.17	17.39	13.18	3.85	17.04	2.18	10.79	3.19	2.79	2.38	8.73	4.73	6.28	10.28
YBL023C	24.2	7.27	11.53	17.96	19.7	15.31	19.23	23.65	21.18	19.12	19.23	19.55	11.78	17.34	11.05	15.15	18.97	14.07	24.29	16.81	14.57	16.44	31.05	12.38		YBL023C	4.48	7.22	7.3	4.81	10.1	6.87	2.51	2.81	0	1.38	10.72	8.4	1.46	9.44	0.73	5.01	0	0	1.36	6.14	6.29	6.02	9.46
YBL024W	30.03	32.48	24.02	25.81	37.41	24.21	19.61	28.62	41.69	22.93	26.86	25.09	18.06	18.55	17.25	17.69	15.47	14.77	28.73	22.94	17.13	18.38	45.35	8.36		YBL024W	23.49	59.65	45.6	23.3	72.37	45.43	29.61	40.07	36.11	16.96	56.4	44.4	5.7	36.97	4.71	12.74	19.26	28.93	5.58	29.42	20.41	33.93	31.33
YBL025W	61.48	24.41	14.08	34.83	50.8	30.11	49.07	30.93	63.3	57.28	37.61	29.02	34.07	32.88	41.5	32.06	50.97	41	53.26	42.87	45.87	43.33	89.02	23.91		YBL025W	10.84	3.93	3.7	5.7	5.58	1.92	5.32	0	0	6.93	9.82	1.11	0	3.17	0	2.05	0	37.45	0	12.38	0	3.19	5.18
YBL026W	587.86	1656.99	952.32	698.69	940.11	1094.88	591.6	1000.74	649.36	775.69	824.54	744.27	1257.32	869.27	1086.62	1106.33	990.13	936.67	1100.25	978.17	780.42	1188.3	683.96	732.3		YBL026W	29.04	79.05	73.39	80.17	67.26	48.94	74.77	75.8	0	37.15	82.18	58.21	13.17	50.99	0	45.69	57.24	0	6.11	72.38	0	54.7	108.2
YBL027W	1237.59	692.42	808.84	1067.93	1017.4	892.81	1070.79	944.83	973.26	867.04	1132.31	1049.6	864.95	1160.08	948.89	1092.64	1073.33	1196.85	922.78	1133.4	749.88	1138.52	1248.11	1028.5		YBL027W	571.17	435.89	297.91	682.24	616.65	406.21	684.24	437.27	361.32	594.02	900.85	533.49	193.26	591.54	67.81	541.12	493.67	466.44	131.82	747.98	221.73	253.91	723.25
YBL028C	1397.43	3554.84	2929.92	1863.67	4217.47	2821.69	1252.9	2024.51	3438.6	1203.66	1821.99	1677.21	2085.13	1104.46	1103.66	971.87	1397.94	803.3	588.22	1382.99	1293.97	1587.86	1107.86	1619.66		YBL028C	28.31	136.79	131	22.33	166.64	86.63	44.26	110.84	0	33.96	74.51	64.38	0	34.18	7.17	28.06	41.85	0	4.46	52.92	62.1	87.49	40.57
YBL029C-A	179.01	67.59	48.72	169.32	52.75	91.87	178.01	199.84	72.61	224.89	82.05	123.4	159.29	219.85	215.86	164.82	156.24	161.64	200.88	137	95.25	112.91	68.86	52.02		YBL029C-A	70.02	8.17	28.69	86.79	30.89	5.32	58.87	78.32	0	38.39	47.56	32.39	40.82	87.82	0	101.98	59.15	0	0	68.56	0	15.9	45.87
YBL029W	81	41.73	50.54	47.05	60.66	54.21	82.44	76.68	61.24	56.88	44.43	36.15	58.09	72.14	64.98	61.85	63.49	62.91	74.82	50.76	44.38	65.36	52.7	37.23		YBL029W	4.17	13.87	11.77	10.23	7.87	5.67	4.77	7.25	0	1.78	5.35	4	1.89	6.1	0	1.57	0	9.6	1.17	7.03	0	8.02	9.03
YBL030C	72.86	38.49	19.97	57.05	42.05	43.59	74.42	84.89	29.08	31.85	61.81	52.62	46.49	60.8	59.48	83.99	56.25	59.17	115.12	63.1	43.39	40.99	103.6	42.55		YBL030C	268.83	89.61	104.96	299.22	205.34	158.83	335.63	98.11	73.69	363.98	252.2	195.3	98.41	243.04	21.92	301.52	161.66	236.16	45.27	255.84	159.93	90.52	233.1
YBL031W	17.34	14.27	7.2	14.64	8.81	5.75	26.45	21.76	18.23	40.47	24.31	26.35	22.06	26.85	30.13	25.64	19.68	23.56	40.14	30.52	24.12	25.32	50.1	11.48		YBL031W	4.22	0.57	0.58	5	0.41	0.56	4.27	0	0	1.01	3.94	2.12	0	2.32	0	0.8	0	0	0.67	4.28	0	0.37	3.63
YBL032W	25.95	8.21	7.99	21.44	29.65	22.18	40.99	41.64	31.5	65.44	46.31	31.39	51.27	48.96	51.73	60.1	61.56	44.38	83.96	73.82	52.67	74.62	108.69	42.68		YBL032W	32.82	9.68	5.23	43.87	13.02	6.07	31.86	14.28	0	30.62	30.03	14.2	6.82	25.62	2.77	10.67	32.35	18.9	1.15	46.02	8	4.83	38.41
YBL033C	37.14	18.54	14.03	18.63	28.49	16.28	26.03	26.76	27.05	28.18	21.75	17.13	15.37	19.71	25.79	17.83	22.82	23.76	40.68	22.24	22.87	18.88	53.33	14.6		YBL033C	9.26	16.25	10.68	10.96	9.14	7.67	12.87	8.06	0	3.95	4.89	3.17	1.4	4.52	3.13	6.8	0	0	0.65	9.94	18.06	5.09	11.21
YBL034C	7	2.69	3.68	6.92	7.08	5.58	9.82	10.59	7.02	12.09	9.85	8.27	11.08	12.17	11.35	12.52	10.12	10.63	16.69	13.13	9.84	12.06	11.53	7.8		YBL034C	2.49	0.65	0.48	1.88	1.07	0.85	2.78	0	0	1.14	3.44	1.9	0.14	1.92	0	0.98	0	0	0.13	2.35	1.74	0.42	1.99
YBL035C	14.92	5.07	5.26	19.04	14.63	7.27	29.5	27.54	18.02	25.68	33.22	32.66	16.35	42.95	24.9	20.91	16.55	16.27	23.55	26.57	12.57	28.89	22.17	18.08		YBL035C	3.37	0.98	0.25	2.48	2.26	0.96	4.3	0	0	1.73	19.25	9.23	0.61	10.27	0	4.93	2.66	0	0.28	7.99	0	0.95	3.74
YBL036C	419.41	466.75	378.84	460.74	636.15	503.16	350.58	436.21	473.61	326.37	361.94	303.3	348.25	342.31	286.7	293.45	388.92	290.33	275.28	380.73	280.27	424.84	347.69	347.2		YBL036C	12.01	32.29	23.28	14.81	39.99	16.38	17.68	0	0	10.09	30.6	22.23	4.09	25.05	3.04	12.47	0	15.57	2.84	15.44	0	18.3	24.53
YBL037W	9.24	4.73	4.38	4.3	8.04	3.62	7.3	6.94	5.56	11.15	7.76	3.36	11.94	6.4	8.66	14.51	11.94	11.31	18.33	15.06	9.9	12.27	11.3	9.08		YBL037W	4.5	0.98	0.57	4.26	1.62	1.12	3.42	0	0	3.17	2.85	2.27	0.82	3.69	0	2.1	0	0	0.38	4.58	0	0.58	5.5
YBL038W	140.34	101.13	126.16	133.98	75.89	123.07	147.6	127.05	89.91	136.89	92.62	74.81	108.29	105.73	134.95	116.74	104.42	129.23	157.18	133.51	98.67	93.81	105.75	123.3		YBL038W	19	7.52	12.86	14.98	16	10.57	12.7	0	0	13.26	13.49	7.46	0	10.61	0	11.09	0	0	4.36	16.14	0	5.79	16.33
YBL039C-A	0	0	0	0	0	0	0	0	0	0	0	0	0	0	0	0	0	0	0	0	0	0	0	0		YBL039C-A	0	0	0	0	0	0	0	0	0	0	0	0	0	0	0	0	0	0	0	0	0	0	0
YBL039C	86.8	73.2	50.76	53.62	76.58	68.24	25.19	53.31	63.82	31.82	46.31	36.49	34.86	30.44	34.03	36.93	27.67	33.31	33.64	47.07	24.9	38.35	46.7	23.05		YBL039C	33.9	102.35	79.22	27.18	161.35	96.61	51.73	35.1	79.74	29.03	111.13	94.67	8	71.33	3.97	17.98	39.76	29.04	28.28	44.16	14.75	70.25	48.02
YBL039W-B	204.11	427.35	123.21	475.83	83.38	268.93	725.68	641.82	126.65	474	359.15	235.89	346.22	814.2	792.52	427.56	223.08	571.84	675.63	404.25	160.6	223.1	320.83	269.14		YBL039W-B	0	34.43	47.52	74.83	0	50.49	139.58	0	0	0	42.95	58.51	43.02	55.53	0	47.76	0	0	0	98.52	0	11.17	18.13
YBL040C	276.4	333.27	189.74	288.88	351.46	258.36	326.31	370.64	280.83	308.28	376.4	312.21	401.74	376.97	359.55	297.95	401.1	282.49	355.75	381.96	416.16	407	275.54	284.28		YBL040C	21.54	19.88	11.26	41.37	20.24	10.96	42.72	29.33	0	23.36	41.98	23.68	8.92	37	0	30.76	22.15	0	3.54	40.85	0	13.56	45.09
YBL041W	217.27	47.97	82.99	147.15	126	133.49	138.88	136.63	95.97	103.43	120.95	109.06	87.25	171.83	100.09	105.92	85.86	113.78	149.12	114.7	74.89	108.66	124.67	77.47		YBL041W	44.24	32.11	32.23	47.17	58.18	34.01	61.47	0	0	33.02	96.26	55.32	12.26	70.49	14.93	51.35	0	16.98	8.27	60.74	0	31.54	66.68
YBL042C	35.62	23.73	23.95	9.55	24.47	20.91	7.87	16.87	20.6	25.31	9.66	8.64	23.47	5.51	13.45	24.7	19.47	20.46	29.69	35.89	22.3	23.01	33.45	12.81		YBL042C	18.56	13.66	9.53	11.68	24.79	13.62	25.47	19.64	25.96	11.55	3.07	4.72	3.07	3.08	0.51	1.14	2.97	10.4	2.22	25.63	13.21	10.1	13.23
YBL043W	60.8	30.44	16.09	14.48	29.04	39.08	17.23	27.62	37.21	30.3	18.48	13.79	8.22	14.15	15.42	16.81	12.86	13	26.95	21.48	15.25	19.07	34.82	5.68		YBL043W	0.75	4.09	8.41	2.37	1.74	2.4	1.1	0	0	0	1.02	0.93	0	0	0	0.85	0	0	0	2.34	0	3.45	2.15
YBL044W	4.47	0	0	0	4.46	0	2.38	0	0	2.93	3.2	0	2.53	0	2.65	2.15	2.56	0	3.26	3.09	0	0	3.68	4.8		YBL044W	0	0	0	0	0	0	0	0	0	0	0	0	0	0	0	0	0	0	0	0	0	0	0
YBL045C	35.36	16.55	7.16	33.17	17.76	23	60.74	57.79	18.21	46.18	34.78	29.52	36.57	37.38	49.49	46.73	41.47	42.83	83.37	46.3	32.66	35.77	67.37	25.71		YBL045C	65.4	18.2	20.78	104.92	22.12	25.81	102.45	17.26	28.52	59.23	57.65	41.35	19	50	2.98	77.83	30.42	76.17	9.73	97.53	51.59	16.35	84.03
YBL046W	31.92	15.53	14.18	26.12	30.3	14.33	38.75	28.67	28.77	44.17	38.43	21.76	28.98	36.81	30.14	29.78	35.13	33.75	50.42	34.98	21.89	29.73	61.35	23.18		YBL046W	4.98	2.29	1.41	4.53	4.14	1.63	3.99	12	9.91	7.35	5.46	4.72	0.52	4.04	0	4.48	0	0	0.48	3.34	6.72	2.03	3.51
YBL047C	28.88	10.84	13.85	31.22	22.02	16.56	35.35	26.71	18.62	28.44	27.12	22.78	14.15	28.78	17.02	26.11	19.95	17.34	40.2	22.77	19.03	23.15	38.05	16.45		YBL047C	14.55	5.78	5.3	19.93	12.16	10.54	17.38	5.14	8.49	8.4	27.19	14.17	4.02	22.76	2.22	15.24	9.06	11.34	3.17	18.33	3.84	7.03	20.25
YBL048W	47.08	0	29.77	53.9	30.22	49.39	55.47	55.73	22.95	39.65	45.8	30.69	19.01	83.97	49.21	37.13	30.8	30.87	68.57	46.52	14.55	32.35	30.46	32.52		YBL048W	0	0	0.52	0	2.95	0	2.81	0	0	0	0	0	0	0	0	0	0	0	0	0	0	1.35	4.38
YBL049W	184.76	80.29	77.16	124.78	55.7	113.18	158.6	106.77	57.5	134.72	78.72	65.91	45.34	111.93	71	57.74	45.9	55.62	63.47	55.46	12.57	53.09	64.58	28.09		YBL049W	3.96	8.63	6.22	6.25	1.53	7.38	2.91	0	0	0	6.73	1.83	5.39	10.43	0	8.97	0	0	0	1.23	0	1.4	4.54
YBL050W	214.95	97.24	121.21	209.87	128.9	163.06	211.11	163.09	115.38	148.24	120.58	106.01	92.89	199.75	127.73	112.94	123.48	151.69	164.95	139.91	92.7	112.88	123.77	132.69		YBL050W	22.86	11.75	14.31	36.06	33.33	13.18	20.55	19.89	0	26.81	31.91	24.47	6.05	31.77	1.29	34.28	22.53	0	8.01	26.5	11.14	15.02	30.57
YBL051C	18.92	16.13	14.42	19.99	20.78	12.67	23.26	19.54	16.38	24.92	22.3	19.46	13.07	18.14	16.79	20.08	16.12	14.79	36.73	20.35	18.19	17.18	36.51	11.06		YBL051C	12.66	6.76	7.01	16.39	9.4	3.18	14.58	0	0	6.87	16.38	8.54	4.55	17.19	0	11.54	11.3	9.9	1.51	21.28	20.95	5.9	15.6
YBL052C	12.45	8.81	8.4	12.25	11.43	9.52	19.84	13.81	12.83	27.33	15.84	11.17	21.62	20.21	20.88	20.42	22.14	20.19	25.35	24.5	21.72	31.13	22.9	12.56		YBL052C	0.94	0.2	0.23	1.59	0.87	0.6	0.83	0	0	1.08	0.89	0.87	0	0.5	0	0.53	2.22	0	0	2.23	0	0.13	2.05
YBL053W	77.83	172.35	181.92	217.3	342.38	207.86	377.44	359.59	374.3	655.8	367.47	262.43	672.46	437.18	390.12	483.83	808.57	434.8	425.93	482.18	604.1	767.05	661.1	529.61		YBL053W	0	0	0	0.5	0	0	0	0	0	0	0	0	0	0	0	0.56	0	0	0	0	0	0	0
YBL054W	62.09	32.44	32.93	35.18	69.61	49.95	23.31	47.06	71.94	24.91	26.87	31.62	32.1	17.89	24.19	21.83	22.72	19.51	21.67	31.83	17.89	30.92	44.92	16.58		YBL054W	1.25	10.74	9.02	1.23	27.79	11	3.45	4.9	32.4	1.8	9.99	9.56	0.85	3.85	1.27	0.83	3.7	6.49	1.18	6.83	10.99	10.62	2.15
YBL055C	77.1	34.93	65.98	49.31	53.08	50.81	26.37	43.22	40.24	20.94	39.14	22.48	36.96	36.9	30.96	42.59	37.83	45.37	35.22	48.19	19.17	33.97	30.16	26.24		YBL055C	3.67	5.78	5.41	2.9	10.71	3.69	3.9	0	0	3.92	8.87	3.4	0.56	3.94	0	1.69	0	8.46	1.03	5.34	0	6.05	2.34
YBL056W	117.22	35.42	75.19	68.57	45.55	60.54	52.89	62.56	42.05	50.69	60.66	41.22	36.28	71.15	62.95	45.75	41.78	58.58	86.59	52.65	38.12	39.84	49.21	35.49		YBL056W	21.09	16.93	17.14	27.35	30.9	17.5	25.77	5.6	36.99	10.29	34.71	23.25	2.92	24.48	0.72	22.94	12.68	7.41	6.31	28.28	6.27	15.02	28.27
YBL057C	209.52	72.7	102.18	153.68	152.49	120.1	148.81	133.07	143.41	148.29	134.29	112.29	107.43	121.62	112	110.39	109.78	110.61	122.84	125.88	87.09	106.75	166.67	123.05		YBL057C	31.27	10.98	15.3	21.48	27.25	11.81	27.46	0	0	17.42	40.42	15.24	2.74	13.28	2.04	14.09	11.93	0	3.82	18.23	0	10.33	21.39
YBL058W	100.57	25.37	32.92	70.19	51.28	50.23	65.57	57.42	38.88	50.8	59.15	44.56	24.43	54.32	42.16	44.03	41.76	41.18	68.94	40.41	20.43	30.09	75.52	28.16		YBL058W	21.73	20.15	18.58	25.71	37.58	19.06	18.06	25.2	31.23	15.44	46.18	29.53	4.38	39.21	0.81	32.36	19.03	25.02	5.58	22.31	21.18	20.18	22.37
YBL059C-A	255.26	356.3	443	288.24	356.27	278.03	467.66	537.2	343.17	423.69	411.73	302.56	541.24	558.79	541.45	490.15	561.28	478.03	522.46	563.74	472.82	520.83	336.75	657.58		YBL059C-A	13.18	14.35	12.61	20.8	15.27	8.77	12.12	0	0	18.97	15.67	10.15	0	23.15	0	17.42	0	0	0	20.53	0	4.66	26.45
YBL059W	31.09	20.31	15.37	39.22	38.64	31.44	58.6	40.75	37.81	49.39	29.87	29.11	37.02	53.09	52.18	44.29	40.89	48.14	67.92	54.9	27.19	33.4	48.2	36.24		YBL059W	4.51	4.3	2.46	3.56	6.09	2.4	3.32	0	0	0	7.66	1.39	0	0.99	0	3.83	0	0	0	5.62	0	2.39	5.17
YBL060W	44.28	18.77	23.45	24.82	28.68	21.5	34.15	34.65	32.56	33.9	21.18	18.33	33.18	26.17	26.83	25.53	29.86	28.77	25.72	26.21	16.75	37.24	37.91	20.14		YBL060W	1.16	0.38	0.28	1.46	1.43	0.12	1.02	0	0	0.44	1.42	0.86	0.31	1.02	0	1.57	0	0	0.29	1.44	0	0.33	0.53
YBL061C	27.58	8	20.69	17.22	19.1	18.33	14.61	18.11	19.31	13.38	18.94	12.73	11.37	15.99	12.48	12.17	12.73	12.03	16.68	13.35	10.27	11.75	23.36	6.71		YBL061C	2.97	3.83	4.09	2.99	10.3	7.72	4.2	0	0	1.75	8.5	4.99	0.62	3.75	0	2.41	0	0	0.95	3.44	0	4.67	2.7
YBL062W	97.46	194.62	136.08	126.66	241.34	208.03	120.31	217.93	230.29	111.2	183.25	152.15	139.17	192.75	143.61	141.12	130.59	119.54	147.92	183.29	122.13	192.53	181.8	109.75		YBL062W	0	2.83	5.12	2.59	0.92	6.88	0	37.15	0	0	3.43	0.79	0	2.66	0	0	0	0	2.1	7.05	0	0	7.26
YBL063W	11.79	4.96	6.17	10.16	7.26	7.12	12.76	12.39	7.3	22.14	11.03	8.05	18.36	15.64	18.06	19.95	18.72	17.05	25.29	19.27	12.06	18.25	10.67	6.25		YBL063W	1.79	0.22	0.19	1.63	0.11	0.37	1.52	0	0	0.53	1.22	0.64	0.75	1.69	0	0.36	3.26	0	0.17	1.97	0	0.1	2.84
YBL064C	65.16	13.25	18.63	46	9.7	26.27	48.22	44.32	13.62	34.77	16.71	25.32	19.03	36.49	33.02	28.59	19.27	35.09	52.48	18.36	19.61	21.79	25.58	22.95		YBL064C	27.95	15.62	21.6	33.07	13.06	15.26	31.92	0	38.06	16.94	25.48	12.02	18.01	43.27	2.98	54.71	8.7	15.25	2.78	19.25	0	15.07	25.72
YBL065W	6.94	0	0	1.4	2.6	5.24	2.77	3.75	7.4	10.21	0	5.09	9.06	7.43	6.18	9.87	14.9	6.83	8.99	4.97	3.75	8.34	2.14	5.59		YBL065W	0	0	0.4	2.33	0	1.57	2.18	0	0	0	0	0	0	0	0	1.12	0	0	0	3.73	0	0	1.69
YBL066C	9.59	2.4	4.4	4.75	6.66	3.7	6.29	6.49	5.72	6.28	4.78	4.19	5.68	4.34	5.32	10.73	7.9	6.44	14.93	8.43	9.28	9.38	11.27	3.9		YBL066C	0.8	0.58	0.67	2.62	1.74	0.92	2.84	2.08	0	1.28	2.62	1.27	0.36	1.17	0.27	1.76	0	0	0.17	1.99	0	0.94	2.06
YBL067C	57.23	18.07	25.09	38.52	50.1	41.37	36.09	43.38	36.78	30.67	34.5	30.53	32.99	47.99	28.29	40.23	34.89	39.23	44.56	42.28	19.83	46.47	46.05	23.56		YBL067C	3.59	1.61	1.27	4.83	9.29	3.37	3.26	0	0	2.43	8.03	4.62	1.72	3.89	0	4.22	2.5	0	1.07	5.13	11.11	4.18	6.05
YBL068W-A	0	85.51	0	19.05	2.42	31.68	10.42	7.88	16.66	30.95	18.53	20.35	51.79	62.71	46.2	32.84	61.35	97.17	21.28	36.86	31.58	37.63	27.54	9.72		YBL068W-A	13.51	33.72	20.93	15.79	31.97	33.26	19.6	148.63	0	0	50.47	23.37	0	2.72	0	22.48	105.3	0	19.66	28.02	0	5.77	26.61
YBL068W	71.27	47.25	36.57	46.21	45.61	57.28	24.82	56.03	37.59	26.42	47.37	39.28	23.08	43.68	39.2	45.02	31.71	39.93	38.22	39.32	18.93	26.49	46.41	22.45		YBL068W	11.59	20.14	19.07	10.45	45.6	18.26	15.84	8.65	114.28	5.3	40.5	28.26	5.26	21.33	1.12	8.75	19.59	0	2.79	17.54	9.69	15.6	14.87
YBL069W	23.14	0	5.4	17.9	17.22	15.18	30.08	21.49	15.18	20.34	18.52	15.81	24.97	19.86	22.06	24.85	26.15	16.45	20.89	22.23	11.13	26.35	34.98	7.81		YBL069W	5.37	8.7	9.4	9.63	8.75	5.75	13.16	0	20.48	13.67	12.84	6.02	1.62	9.59	0	7.43	4.97	0	2.67	7.67	6.94	5.88	9.72
YBL070C	9.04	0	0	15.83	19.32	5.35	43.68	31.62	36.97	28.98	37.38	35.85	39.21	30.09	25.71	18.2	10.7	15.44	41.14	20.1	9.99	19.97	38.54	16.91		YBL070C	3.54	2.14	8.24	2.92	0	4	0	0	0	0	5.79	9.46	0	3.31	14.33	1.38	0	0	0	2.53	0	4.01	6.65
YBL071C-B	0	0	0	0	0	0	0	0	0	0	0	0	0	0	0	0	0	0	0	0	0	0	0	0		YBL071C-B	0	0	0	0	0	0	0	0	0	0	0	0	0	0	0	0	0	0	0	0	0	0	0
YBL071C	89.81	53.04	15.29	59.06	55.19	85.45	45.95	82.15	55.02	49.78	54.48	72.07	70.32	71.48	66.94	97.84	43.51	69.46	73.79	59.73	19.93	66.46	85.33	33.4		YBL071C	7.85	0	1.61	0	0	0	0	0	0	0	0	0	0	3.45	0	0	0	0	4.95	0	0	0	0
YBL071W-A	125.15	0	30.78	78	41.66	51.06	73.99	130.26	106.77	68.31	84.73	86.12	78.62	94.25	96.24	73.43	71.64	72.94	118.14	100.98	30.09	66.88	137.39	44.82		YBL071W-A	71.09	47.31	36.69	37.39	115.87	121.91	75.55	0	0	166.75	96.57	31.67	10.75	55.48	16	47.72	186.84	163.76	9.97	68.91	0	50.22	67.92
YBL072C	658.14	353.59	405.98	539.81	420.62	390.39	562.36	424.92	436.1	513.88	605.03	490.31	398.28	452.75	397.68	332.81	393.11	396.51	378.06	414.1	344.7	397.36	712.33	432.13		YBL072C	709.96	287.71	210.76	781.57	474.3	309.38	776.16	441.81	0	662.77	885.68	564.71	223.95	646.21	75.74	444.5	451.39	719.01	150.14	722.81	932.19	230.47	681.26
YBL073W	15.88	0	0	5.44	6.87	9.1	18.61	17.05	9.57	22.2	7.37	2.19	15.61	7.48	10.77	13.22	19.38	16.29	26.45	20.99	33.96	21.69	11.08	21.68		YBL073W	0	2.48	1.17	0	2.95	0	5.62	0	0	0	5.36	2.36	5.2	0	0	0	0	0	0	0	0	0	2.19
YBL074C	13.39	0	5.81	9.8	5.66	4.23	12.7	9.44	6.22	13.72	8.76	6.27	5.88	11.2	10.19	8.99	8.99	7.25	16.09	8.76	6.31	11.9	12.96	2.35		YBL074C	0.99	2.38	1.61	2.74	3.07	3.7	1.1	0	0	0	6.05	2.76	0.68	4.36	0	2.44	0	10.3	1.88	1.55	0	1.58	2.28
YBL075C	26.19	5.55	9.13	12.41	14.52	13.67	18.48	15.33	13.7	19.47	14.62	11.18	10.31	13.47	13.99	13.54	15.65	16.32	20.12	12.76	6.89	15.66	28.05	5.6		YBL075C	0.49	1.88	1.15	1.17	1.1	0.26	0	0	0	0	0.33	0.76	0.67	0	0	0.19	0	0	0	0.15	0	1.31	0.14
YBL076C	79.6	41.48	37.6	61.92	64.34	55.02	53.88	59.82	56.32	56.97	64.48	48.24	51.79	64.33	44.02	59.06	57.94	56.58	66.94	65.78	35.81	65.63	76.37	43.04		YBL076C	63.36	50.27	38.56	74.05	83.24	46.5	76.48	29.25	3.7	42.86	108.08	75.32	19.78	82.69	6.63	48.75	59.68	44.46	13.19	82.64	47.67	39.92	97.87
YBL077W	197.98	355.45	140.72	225.52	305.99	275.24	197.11	335.23	234.66	204.81	312.31	331.61	274.79	333.24	226.63	377.51	313.34	307.48	368.26	318.15	220.48	409.58	367.69	207.81		YBL077W	21.83	42.41	35.51	57.47	71.21	21.46	58.33	27.14	0	48.97	79.13	42.54	5.85	58.93	7.92	51.66	37.24	0	4.31	82.23	0	34.23	76.15
YBL078C	442.9	175.66	406.96	328.74	203.19	255.83	340.46	236.73	213.34	305.09	156.41	164.62	141.39	243.13	236.56	132.99	162.8	163.96	170.2	154.3	166.21	94.32	169.55	155.4		YBL078C	33.42	30.33	25.11	30.76	17.2	26.68	28.69	0	0	21.38	34.05	18.04	18.95	26.9	0	42.07	0	0	10.54	20.83	0	15.74	17.56
YBL079W	22.22	17.6	10.73	17.1	16.82	17.75	16.7	17.79	17.65	16.92	15.42	12.3	14.36	15.54	14.71	22.39	15.75	18.65	25.98	18.6	12.34	20.92	21.27	9.38		YBL079W	5.51	4.96	4.31	8.14	11.75	5.86	6.26	3.14	5.18	3.27	8.44	6.02	1.09	5.45	0.41	3.52	3.55	2.08	1.64	8.18	0	5.41	8.21
YBL080C	7.46	1.36	2.36	5.97	4.52	3.5	10.63	9.4	5.6	10.64	7.83	4.34	4.82	9.69	8.42	11.63	9.45	9.31	21.07	9.02	7.68	14.09	14.69	4.86		YBL080C	1.51	0.49	0.5	2.15	0.7	0.32	2.45	0	0	1.16	1.85	0.56	0.41	1.59	0	3.43	0	0	0	3.58	0	0.32	2.43
YBL081W	44.64	27.84	26.79	42.26	72.75	33.7	43.8	56.64	69.7	47.91	52.69	51.5	42.12	29.96	35.8	37.72	34.07	22.1	53.2	38.47	32.6	38.24	108.2	35.17		YBL081W	8.81	11.66	14.63	5.73	25.27	17.14	9.98	14.89	0	4.83	27.16	12.95	2.82	15.45	2.89	4.36	0	0	4.88	11.94	0	12.43	10.49
YBL082C	6.9	0	0.71	4.34	6.35	1.88	2.14	5.58	6.21	4.67	10.26	4.59	4.8	3.81	4.86	7.4	4.32	3.06	11.7	6.87	10.75	4.57	9.94	0.78		YBL082C	4.16	3.64	2.9	8.63	10.84	6.56	13.19	5.74	9.48	6.11	12.14	7.47	1.76	9.92	0	4.72	0	7.6	1.53	11.36	0	5.5	8.02
YBL083C	9.94	0	0	7.88	5.5	4.47	4.04	13.24	3.97	6.47	18.77	4.53	5.37	7.68	3.9	7.4	6.35	6.8	8.36	4.85	4.59	3.11	15.95	3.13		YBL083C	16.44	1.84	1.58	13.74	6.86	7.44	11.33	0	0	12.08	28.7	6.37	1.2	5.29	0	1.36	0	0	1.66	16.91	0	5.06	5.25
YBL084C	23.75	5.62	8.09	13.24	11.34	8.91	14.26	9.24	12.37	12.02	9.11	9.61	6.99	10.89	8.97	14.68	12.57	14.02	18.76	13.95	7.41	12.02	15.97	5.89		YBL084C	3.57	3.96	3.02	2.62	5.29	0.66	3.82	3.25	0	1.2	5.5	2.18	1.7	3.65	0	2.82	0	4.31	1.05	4.14	0	2.35	4.48
YBL085W	12.46	4.25	4.29	11.47	9.54	6.26	20.93	12.37	13.31	22.13	15.78	12.91	15.19	21.64	15.72	22.54	21.09	18.4	37.38	25.67	18.58	25.31	36.6	16.66		YBL085W	3.46	0.09	0.3	4.84	0.61	0.67	3.7	0	4.07	2.42	3.21	1.89	0.64	1.8	0	2.02	0	3.26	0.2	5.4	0	0.33	3.61
YBL086C	41.73	9.71	16.79	50.5	25.89	19.92	65.77	42.37	25.53	38.93	55.75	39.36	26.81	65.64	36.38	41.73	41.63	40.9	46.81	36.95	28.27	42.57	60.13	31.93		YBL086C	2.87	2.15	2.16	5.1	2.22	0.38	1.59	0	0	1.38	7.32	4.1	0.98	6.31	0	6.51	0	7.45	0.91	3.36	0	1.14	3.09
YBL087C	607.74	230.48	243.01	470.44	260.47	280.47	410.19	336.79	247.89	329.54	469.63	374.95	332.4	399.87	345.66	345.97	293.98	368.7	390.76	363.95	230.35	296.06	519.67	189.42		YBL087C	713.15	367.14	240.6	631.06	616.79	366.38	629.05	440.25	60.62	468.66	893.3	582.07	166.14	633.09	52.86	446.94	384.61	446.89	96.81	520.01	1069.2	206.62	552.53
YBL088C	7.04	2.62	2.99	4.38	3.76	2.82	6.22	4.63	4.02	6.77	5.1	3.88	5.37	6.14	4.78	8.18	5.33	6.73	12.81	7.08	6.98	7.68	7.97	3.15		YBL088C	0.53	0.09	0.13	0.46	0.2	0.03	0.43	0	0	0.2	0.75	0.33	0.14	0.23	0	0.2	0	0	0.07	0.53	0	0.28	0.3
YBL089W	31.1	6.59	17.8	16.85	10.92	11.19	23.11	22.26	15.74	27.19	18.45	12.8	31.29	23.65	22.78	31.35	19.89	26.44	36.71	24.03	21.81	25.28	25.17	8.64		YBL089W	3.29	1	1.6	4.61	4.52	1.17	4.03	0	0	5.61	5.96	2.48	0.99	6.74	0	1.38	0	0	1.38	5.01	0	1.68	3.56
YBL090W	239.71	243.83	175.74	253.3	255.99	264.79	283.67	325.32	191.61	324.67	217.11	212.97	404.05	238.74	273.19	245.03	275.33	247.43	303.43	292.62	284.7	367.33	223.21	281.52		YBL090W	6.44	13.33	12.5	18.3	5.97	3.43	8.53	0	0	2.47	15.76	5.96	0	6.79	2.61	9.25	15.24	0	3.25	14.45	0	6.83	8.86
YBL091C-A	137.06	17.73	28.12	52.45	33.45	20.98	86.65	30.79	34.16	112.72	36.43	33.13	48.33	46.15	38.37	36.59	38.35	32.31	64.48	48.73	28.32	33.33	71.32	38.47		YBL091C-A	1.31	2.86	3.41	11.39	1.01	4.89	6.76	0	0	5.04	12.48	2.43	5.36	10.37	0	7.93	0	0	0	8.18	23.03	1.39	5.27
YBL091C	52.71	34.63	35.47	43.19	51.57	32.21	54.57	43.88	45.37	52.95	59.74	40.86	34.63	50.06	36.05	37.1	35.07	29.89	62.93	45.07	42.64	42.25	109.96	28.31		YBL091C	30.75	24.67	16.03	34.47	22.8	18.3	30.66	6.34	0	18.64	48.64	21.21	12.66	35.17	3.28	29.03	9.57	16.78	2.55	35.04	0	14.86	38.27
YBL092W	1219.61	801.98	819.38	1099.8	964.27	981.1	1049.5	896.28	1110.73	798	1055.92	1317.79	711.01	922.35	923.34	685.46	818.57	1038.6	725.56	839.91	762.87	772.47	1153.1	961.73		YBL092W	1295.15	898.99	557.24	1355.2	1200.87	650.18	1329.39	940.96	172.75	1093.31	1683.79	1232.45	439	1258.31	157.74	1029.36	1289.61	876.58	320.06	1724.96	1132.59	470.81	1572.84
YBL093C	483.72	293.4	333.52	311.51	432.6	313.98	324.2	283.27	435.52	457.01	243.05	229.04	288.02	178.8	220.23	136.81	179.09	166.11	159.43	221.46	176.02	288.84	278.48	244.6		YBL093C	22.33	42.04	33.56	18.35	58.9	27.73	11.64	0	0	3.57	29.07	14.63	5.06	26.96	0	14.76	33.01	0	14.09	20.87	0	19.72	18.67
YBL094C	41.98	18.62	24.21	54.66	69.12	56.72	52.98	50.67	42.22	84.21	52.98	58.14	88.27	53.02	74.63	75.18	67.89	70.99	53.74	69.53	25.36	68.47	59.72	25.51		YBL094C	0	0	0.51	3.33	1.19	3.18	2.76	0	0	2.22	0	4.89	0	0	0	0	0	0	0	5.21	0	1.58	0
YBL095W	24.34	11.77	8.41	14.66	11.18	14.17	14.52	25.38	13.87	13.15	10.58	10.8	8.48	15.89	16.77	14.51	13.36	17.27	32.41	17.83	17.21	9.11	30.84	9.19		YBL095W	2.81	3.84	7.07	4.82	5.71	6.79	4.05	0	0	3.56	3.56	3.49	0.96	0.62	0	5.58	0	0	0	3.25	0	5.55	5.24
YBL096C	8.75	35.36	7.65	14	22.44	14.72	25.35	33.09	38.15	43.47	39.87	24.27	24.83	21.7	40.92	69.52	52.35	45.16	53.81	90.51	47.45	87.28	45.2	29		YBL096C	0	6.37	1.72	0	0	0	0	0	0	0	4.12	0	0	0	0	0	0	0	0	0	0	1.77	0
YBL097W	9.32	4.71	4.89	5.5	7.35	2.27	11.65	5.3	9.94	25.54	8.31	6.12	17.68	10.37	10.33	17.92	14.53	11.9	27.15	17.55	18.57	16.22	18.17	7.11		YBL097W	2.72	0.68	0.26	3.46	0.81	0.33	2.15	3.27	0	1.2	2.27	1.29	0.85	2.2	0.85	0.95	0	0	0	4.04	0	0.3	2.87
YBL098W	27.81	6.57	12.08	24.35	23.72	20.34	28.52	23.36	16.61	58.02	25.08	20.29	45.37	41.22	35.16	38.98	38.58	36.62	87.1	47.5	40.74	57.63	47.3	31.03		YBL098W	11.3	0.4	0.75	25.02	1.69	1.94	7.78	17.13	9.43	7	5.7	3.71	1.49	6.4	0	3.58	0	0	0.46	15.68	0	2.06	20.48
YBL099W	37.64	12.16	12.86	33.47	19.88	20.25	51	47.85	17.04	23.97	34.05	23.35	21.68	38.53	37.15	41.72	24.43	31.04	68.03	35.79	26.61	24.75	59.33	16.17		YBL099W	191.64	35.46	40.05	213.71	75.27	69.3	262.15	43.7	23.29	154.91	180.72	122.86	80	177.3	18.83	193.75	69.1	118.18	26.02	198.04	89.62	39.76	187.29
YBL100C	4.82	0	0	6.59	5.31	7.05	13.97	8.32	2.92	13.74	5	2.91	5.18	10.46	14.61	9.23	8.25	11.61	29.14	15.88	10.18	13.36	21.93	3.52		YBL100C	30.62	48.46	30.44	61.6	51.82	25.67	39.11	99.05	0	35.29	35.68	44.71	0	65.08	0	52.99	23.13	0	5.95	101.12	129.2	25.95	78.85
YBL100W-C	0	0	0	0	0	0	0	0	0	0	0	0	0	0	0	0	0	0	0	0	0	0	0	0		YBL100W-C	0	0	0	0	0	0	0	0	0	0	0	0	0	0	0	0	0	0	0	0	0	0	0
YBL101C	22.32	4.93	9.6	9.84	13.83	7.03	15.06	9.81	11.99	8.52	9.5	8.17	5.86	6.79	5.76	8.21	7.03	5.69	21.52	8.33	9.73	8.69	14.68	5.95		YBL101C	2.6	1.86	1.72	4.75	8.13	4.22	2.52	4.29	0	1.84	8.18	3.84	0.93	7.09	0.28	5.74	0	2.84	1.21	5.03	2.4	4.2	4.16
YBL102W	55.29	21.66	24.35	61.94	25.35	36.96	38.73	49.4	25.03	37.14	43.08	28.69	22.01	49.51	44.51	31.28	37.79	44.39	65.74	40.97	24.42	12.21	32.75	17.28		YBL102W	38.46	6.28	7.09	44.75	25.98	10.75	30.42	15.06	0	27.68	36.57	21.64	10.47	34.61	5.84	28.32	22.74	19.93	6.07	31.75	0	8.83	29.76
YBL103C	39.54	7.71	14	23.81	25.26	18.85	32.84	22.57	23.46	32.15	20.29	12.96	17.71	18.69	17.98	24.86	21.37	22.38	36.98	29.78	16.94	30.41	51.07	15.2		YBL103C	3.42	1.12	2.01	3.78	3.17	3.09	6.54	0	0	1.97	5.11	2.43	1.4	2.7	0	2.97	8.09	0	0.43	6.18	0	1.93	4.12
YBL104C	11.46	4.67	7.78	8.84	6.89	5.89	8.18	7.13	9.04	8.96	8.03	5.09	8.54	5.95	5.1	11.81	8.35	9.05	16.56	9.37	7.14	9.6	11.26	5.46		YBL104C	1.92	2.17	1.68	2.92	4.8	1.65	1.96	2.32	0	0.85	4.32	2.65	1.61	2.6	0	1.51	0	0	0.56	2.67	0	1.57	2.29
YBL105C	16.41	5.37	5.94	9.22	12.12	7.89	13.84	11.94	14.27	15.21	11.63	8.37	7.52	11.82	9.46	14.17	11.49	9.89	26.56	11.05	8.41	11.6	25.94	7.14		YBL105C	5.43	1.73	1.58	6.06	9.52	3.81	4.58	2.08	0	1.02	6.66	4.21	0.72	6.63	0.27	3.75	0	0	1.17	5.78	6.98	3.14	8.13
YBL106C	8.22	4.12	2.37	7.66	5.89	5.08	9.06	7.63	8.39	9.05	6.63	4.63	4.7	8.99	4.61	7.14	6.45	6.27	13.8	7.51	6.19	8.38	11.04	4.32		YBL106C	0.3	0.58	0.29	0.12	0.35	0.49	0.11	0	0	0	0.52	0.14	0	0.27	0	0	0	0	0.19	0	0	0.32	0.09
YBL107C	629.43	421.7	272.49	547.39	567.24	358.91	528.68	375.81	393.67	476.83	296.73	254.04	406.69	278.03	252.63	241.98	293.01	213.57	242.84	241.36	181.78	433.57	225.87	254.12		YBL107C	5.51	14.99	9.03	7.82	17.85	5.86	8.91	17.25	0	8.45	12.72	10.53	3	3.87	0	9.56	0	0	2.78	4.12	19.33	7.78	7.58
YBL107W-A	0	0	0	0	0	0	0	0	0	0	0	0	0	0	0	0	0	0	0	0	0	0	0	0		YBL107W-A	0	0	0	0	0	0	0	0	0	0	0	0	0	0	0	0	0	0	0	0	0	0	0
YBL108C-A	427.14	0	1070.94	311.92	289.85	462.09	255.22	156.37	1576.07	421.4	80.24	303.26	0	236.98	385.93	855.41	810.44	237.26	1316.38	1462.85	898.54	1280.52	300.66	0		YBL108C-A	553.93	0	0	0	0	0	0	0	0	0	0	0	0	0	0	0	0	0	0	0	0	0	0
YBL108W	2.37	0	0	0	3.55	1.37	0	0	2.08	0	0	0	8.03	0	0	5.11	4.07	0	13.29	2.46	0	0	2.92	0		YBL108W	0	0	0	0	0	0	0	0	0	0	0	0	0	0	0	0	0	0	0	0	0	0	0
YBL109W	65.53	28.39	19.88	3.05	16.7	3.22	11.9	12.07	49.98	34.6	20.67	11	32.17	7.92	4.58	42.18	60.56	12.29	80.19	43.21	124.34	50.35	29.85	26.82		YBL109W	0	0	0	0	0	0	0	0	0	0	0	0	0	0	0	0	0	0	0	0	0	0	0
YBL111C	3.05	0	0	0.72	0	0	0.45	0	0	1.97	0.8	0	1	0.82	0	1.71	0.83	2.18	3.78	2.07	1.59	1.89	0.99	3.35		YBL111C	0	0	0	0	0	0	0	0	0	0	2.26	0	0	0	0	0	0	0	0	0	0	0.02	0
YBL112C	22.35	30.12	0	13.65	23.35	13.48	39.57	36.88	15.49	21.92	26.95	40.67	16.76	20.52	22.39	0	36.08	15.25	19.68	34.93	0	9.22	63.11	0		YBL112C	0	0	0	0	0	1.93	0	0	0	2.3	0	0	0	0	0	2.64	0	0	0	0	0	0	1.12
YBL113C	16.74	7.1	9.77	10.54	11.06	7.07	20	20.74	11.96	13	22.9	20.41	10.89	21.01	11	13.33	13.08	11.3	22.19	15.33	14.6	13.79	22.56	9.61		YBL113C	0	0	0	0	0	0.54	0.65	0	0	0	0.64	0	0	0	0	0	0	0	0	0	0	0	0
YBL113W-A	13.48	0	0	34.64	21.4	6.8	57.72	0	19.8	45.04	12.58	14.05	8.97	27.25	18.75	0	29.83	3.73	20.27	25.23	0	0	74.01	8.96		YBL113W-A	0	0	0	0	0	0	0	0	0	0	0	0	0	0	0	0	0	0	0	1.59	0	0	0
YBR001C	24.46	4.54	4.71	13.92	12.57	9.93	21.12	17.11	13.51	18.81	12.58	9.71	7.82	13.4	17.45	15.23	12.38	14.05	27.71	15.08	10.23	10.8	27.58	5.9		YBR001C	5.84	3.84	2.59	6.67	8.28	3.64	5.33	3.15	0	3.86	5.61	3.54	1.92	6.19	0.41	10.13	7.14	4.17	2.29	7.65	3.53	4.55	6.81
YBR002C	83.8	35.25	34.3	50.91	60.76	60.12	44.59	60.74	68.23	53.01	49.79	40.04	29.86	45.05	37	41.33	38.78	40.15	69.39	46.45	28.98	37.72	90.74	32.69		YBR002C	13.04	20.59	11.4	8.23	26.18	7.29	8.16	0	0	11.26	17.27	7.64	1.77	10.31	0	6.9	0	0	3.29	10.16	11.45	7.37	11.21
YBR003W	23.41	4.77	6.19	18.92	11.48	12.13	23.48	19.7	11.13	14.25	12.92	11.55	11.24	23.05	15.61	21.93	19.21	20.64	37.11	19.34	11.2	16.94	26.09	13.35		YBR003W	6.71	3.65	3.91	9.75	7.9	8.64	8.83	0	0	4.06	8.87	4.79	2.88	9.61	0.71	9.6	0	0	0	6.82	12.39	3.99	10.72
YBR004C	50.07	24.68	23.64	40.12	26.49	40.74	27.13	28.55	22.93	23.24	22.47	17.74	15.19	25.81	31.88	29.6	23.27	41.11	30.27	23.35	11.93	17.12	19.57	8.14		YBR004C	4.31	6.61	5.56	3.71	6.65	5	5.18	0	0	0.75	7.44	3.98	0.53	4.81	3.96	3.32	4.63	0	0	9.51	0	5.67	5.83
YBR005W	38.31	17.56	9.49	21.54	19.7	17.24	15.06	23.49	25.37	13.48	23.98	17.34	7.76	19.58	20.69	14.41	6.87	16.5	29.98	10.68	7.42	12.38	24.72	9.22		YBR005W	6.82	13.26	17.04	9.99	25.58	16.6	10.04	15.26	0	5.61	5.3	12.02	2.65	6.85	1.97	10.3	0	60.61	3.69	9.72	17.1	8.95	9.5
YBR006W	47.92	31.54	34.42	44.52	31.94	52.73	50.9	54.13	29.87	42.28	34.29	30.03	31.52	64.27	44.68	50.85	43.34	50.15	51.71	47.89	40.21	57.86	34.06	39.09		YBR006W	2	4.17	8.2	3.42	3.86	8.87	4.17	0	0	4.48	7.7	5.76	0.91	11.42	0	8.43	3.94	0	0.84	4.78	0	4.71	3.44
YBR007C	16.62	3.87	6.69	9.28	13.2	8.83	13.57	14.29	13.64	22.51	11.64	10.22	15.38	12.13	14.56	17.5	10.38	11.15	25.95	19.59	14.98	18.17	26.75	12.99		YBR007C	2.36	2.22	2.7	5.92	1.99	1.83	3.16	0	0	2.88	4.37	1.79	0	3.01	0	1.3	0	4.45	0	5.35	0	1.97	4.06
YBR008C	8.92	0	4.07	3.93	3.14	3.04	6.56	6.43	6.42	9.63	6.96	3.25	6.53	4.49	6.12	10.58	11.72	7	16.05	8.17	8.71	7.99	12.75	3.67		YBR008C	0.3	0	0.04	0	0	0	0	0	0	0	0	0	0	0.26	0	0.11	0	0	0	0.37	0	0	0
YBR009C	345.5	299.17	241.61	301.55	186.92	315.48	528.43	470.2	268.15	1574.69	586.08	472.72	1833.83	986.82	1563.69	1441.61	1327.12	1875.46	1125.83	1210.35	1046.29	1094.91	724.58	608.21		YBR009C	507.64	71.76	51	654.35	105.15	71.57	498.97	59.83	0	720.55	297.86	233.68	176.7	301.45	54.16	102.79	162.66	95.05	22.49	554.6	348.66	50.6	392.63
YBR010W	340.81	192.38	115.86	263.35	206.11	219.82	309.16	345.71	191	795.45	378.74	356.58	740.84	496.82	715.93	553.34	610.47	689.6	562.32	514.92	388.25	600.44	398.09	300.49		YBR010W	706.56	160.21	151.52	646.56	184.39	137.61	572.06	79.73	0	490.61	391.37	244.72	162.48	350.78	47.43	139.33	365.06	451.21	41.45	534.64	476.52	91.85	302.77
YBR011C	98.28	43.87	46.8	84.87	77.6	58.75	109.76	100.06	59.8	117.9	100.36	85.31	69.14	94.18	90.16	85.86	85.71	67.69	125.95	84.57	58.52	65.96	204.66	59.55		YBR011C	298.63	127.95	100.84	341.58	161.38	112.29	322.87	162.67	50.4	224.26	261.48	209.4	110.4	243.96	15.78	187.29	184.27	215.35	47.5	333.32	353.2	89.88	334.92
YBR012C	37.83	17.6	7.61	41.34	18.89	39.21	25.62	45.84	34.23	45.05	34.51	31.39	15.56	20.86	24.48	27.24	23.62	27.06	49.25	30.92	17.36	44.1	26.9	12.93		YBR012C	0	0	0.27	1.54	1.51	2.08	0	0	0	0	0	0	0	0	0	0.74	0	0	0	0	0	0	0
YBR013C	86.21	71.28	66.05	64.83	55.63	46.13	122.79	146.23	43	117.28	52.77	47.99	94.49	134.85	139.26	121.29	93.39	96.53	148.74	101.82	71.75	102.06	50.78	74.81		YBR013C	6.78	2.46	11.12	16.05	3.49	1.2	8.31	0	0	13.01	13.82	9.76	12.3	13.89	4.58	18.78	26.73	0	0	12.68	0	3.19	11.66
YBR014C	341.04	160.1	189.39	296.4	212.23	231.85	391.16	275.15	186.3	318.8	178.09	170.95	219.54	252.73	240.15	189.04	204.37	186.62	224.23	204.27	118.12	212.4	120.45	113.68		YBR014C	24.04	23.9	19.85	23.91	29.86	21.7	23.07	16.37	0	20.06	31.24	20.63	5.69	28.45	2.12	24.08	0	21.67	6.59	26.71	0	15.51	25.17
YBR015C	36.85	18.29	16.35	35	27.6	30.94	28.78	38.97	29.27	30.58	43.21	35.1	17.24	41.98	33.26	27.33	21	31.24	49.85	34.11	12.03	22.53	29.42	19.2		YBR015C	20.84	10.9	11.02	28.4	31.55	15.41	26.09	0	28.01	15.06	37.5	21.28	10.31	28.99	7.67	21.46	12.8	16.83	4.44	33.39	19	14.72	25.13
YBR016W	163.04	124.14	183.42	187.89	260.36	111.71	247.36	163.13	216.13	145.63	168.08	130.45	91.43	122.58	111.91	74.71	99.51	53.01	129.53	116.03	90.38	110.17	272.93	93.38		YBR016W	71.19	135.03	94.11	77.89	193.24	87.99	91.23	71.93	59.42	22.04	171.57	55.23	12.5	114.93	9.3	94.52	27.16	47.61	37.66	91.58	0	70.56	77.66
YBR017C	46.54	14.45	21.7	30.24	31.59	24.35	26.64	28.47	26.87	25.61	25.03	18.69	17.27	27.45	18.98	26.03	22.62	24.35	35.27	24.35	11.79	24.77	35.35	17.4		YBR017C	11.65	11.39	8.46	13.05	22.28	11.5	16.76	2.64	0	8.1	21.44	13.01	5.05	14.23	0.34	8.86	15.97	10.5	2.98	15.46	5.92	8.48	17.03
YBR018C	5.06	2.16	1.86	4.05	2.94	1.3	5.6	3.34	2.88	5.79	3.02	1.1	4.29	4.51	3	5.46	2.89	5.52	10.43	3.21	4.25	3.38	4.51	2.26		YBR018C	0	0.26	0	0	0	0	0	0	0	0	0	0	0	0	0	0.36	0	0	0	0	0	0	0.27
YBR019C	2.8	1.02	0.88	0.75	1.6	0.46	0.64	0.72	2.39	2.75	1.29	0.78	0.9	0.29	1.66	4.13	2.06	1.66	8.93	2.49	5.19	3.2	1.65	1.07		YBR019C	0.23	0.37	0.19	0.18	0.18	0.12	0.17	0	0	0.44	0	0	0	0	0	0.26	0	0	0	0	0	0.32	0
YBR020W	6.21	1.4	3.03	1.46	1.91	2.75	1.89	1.97	3.43	1.79	1.96	0.18	3.1	1.95	1.08	3.15	0.63	1.91	6.78	2.27	4.34	3.51	4.51	1.76		YBR020W	0	0	0	0	0	0	0	0	0	0	0	0	0	0	0	0	0	0	0	0	0	0	0
YBR021W	30.64	17.13	13.33	9.66	21.17	17.25	11.28	16.72	16.88	19.14	8.96	8.58	15.39	7.8	8.29	18.96	18.14	14.05	17.98	16.51	17.7	19.67	23.33	7.19		YBR021W	4.56	7.04	5.16	2	7.05	4.59	5.78	0	0	2.43	2.07	2.66	0.34	1.11	1.54	0.86	0	5.26	1.28	3.48	4.45	3.13	2.03
YBR022W	89.99	81.28	57.74	110.9	127.99	112.23	142.44	178.19	86.45	156.77	96.76	99.09	148.79	127.87	160.14	121.43	119.48	114.04	134.92	138.07	85.08	130.93	86.86	91.4		YBR022W	6.44	9.82	8.63	15.25	10.94	5.49	9.48	0	0	0	16.63	5.96	3.51	7.92	0	9.25	0	0	3.25	19.27	22.62	5.46	14.77
YBR023C	27.41	15.33	11.98	21.29	31.4	18.88	21.21	28.88	30.99	19.39	32.12	24.48	14.98	27.37	21.04	17.64	20.05	14.95	29.58	20.31	15.45	26.59	27.6	15.72		YBR023C	7.85	2.85	1.82	4.85	12.02	4.88	7.03	10.25	0	4.52	13.07	7.22	0.71	9.54	0.53	5.48	10.83	2.71	1.65	8.97	6.89	4.39	7.5
YBR024W	59.84	19.26	51.15	41.06	15.03	40.09	46.61	29.05	18.65	33.44	18.11	16.12	15.19	40.65	35.28	27.35	26.46	37.59	40.18	31.23	17.83	20.68	18.59	15.59		YBR024W	6.11	5.65	6.34	5.78	4.71	11.05	6.29	9.56	0	4.69	7.47	4.33	1.66	8.04	0	6.23	7.22	0	3.08	5.33	21.43	2.16	6.65
YBR025C	185.24	57.2	81.04	112.83	87.74	83.11	85.71	79.15	81.54	83.55	107.19	92.71	59.71	92.39	69.19	84.55	73.69	99.56	109.27	81.03	48.92	63.64	176.11	64.18		YBR025C	127.85	74.85	55.15	151.63	116.96	55.46	139.8	82.28	45.32	94.95	196.58	120.43	44.68	140.7	6.21	101.68	93.21	154.32	22.65	156.87	130.63	53.2	171.17
YBR026C	35.96	10.3	24.06	40.64	19.7	24.58	83.32	56.56	27.93	54.58	42.42	36.21	31.86	72.95	60.01	51.01	50.24	54.72	81.1	56.79	33.68	60.66	54.35	58.39		YBR026C	23.32	4.73	5.56	31.03	7.41	5.11	22.21	0	0	14.04	18.95	13.54	10.58	22.89	0	42.31	16.23	9.48	2.88	22.8	8.03	4.85	28.57
YBR027C	11.34	29.03	6.28	25.75	28.32	21.92	27.16	28.61	27.42	35.29	22.36	40.67	28.86	22.26	19.06	29.95	16.23	14.88	42.68	27.46	8.18	36.37	23.35	27.42		YBR027C	0	0	0	0	0	0	2.37	0	0	0	0	0	0	0	0	0	0	0	0	0	0	0	0
YBR028C	34.9	14.1	10.37	16.19	19.54	23.32	19.06	26.81	24.29	24.91	21.53	15.45	20.57	16.91	23.76	17.73	16.41	16.98	34.78	18.49	10.33	16.34	29.49	11.25		YBR028C	6.26	6.14	6.2	9.14	14.98	8.66	6.68	4.9	0	1.2	9.57	8.98	1.28	8.25	0	4.26	0	0	2.76	8.19	5.49	7.96	5.92
YBR029C	63.82	31.45	24.34	27.64	40.04	39.87	20.82	40.55	34.4	25.42	28.28	29.31	30.35	25.38	23.92	35.24	28.88	34.35	52.6	34.89	18.66	30.07	29.02	12.86		YBR029C	11.02	23.2	16.51	16.81	28.37	19.16	15.68	28.77	9.51	16.22	14.22	11.9	2	11.61	2.23	9.57	8.69	7.62	6.49	18.77	0	18.17	18.11
YBR030W	20.3	4	6.91	13.63	15.59	13.48	9	16.5	15.25	14.32	13.06	9.5	8.83	9.28	9.47	8.75	8.34	7.51	15.67	15.3	4.88	10.43	17.36	6.99		YBR030W	4.44	6.6	3.35	3.27	11.19	3.93	4.57	4.63	0	2.84	9.44	2.64	0.4	3.63	0.6	2.12	3.5	0	1.87	4.05	0	4.39	5.25
YBR031W	144.47	100.38	38.62	86.21	85.12	70.48	111.1	109.2	69.69	85.34	123.52	122.16	88.77	111.78	95.72	122.24	98.2	108.74	129.68	113.18	53.36	96.1	200.24	71.59		YBR031W	594.49	238.97	142.05	556.75	398.53	236.11	655.15	146.87	150.62	541.8	739.62	511.13	199.51	570.12	56.73	386.76	415.92	803.34	86.56	632.85	574.63	154.21	483.63
YBR032W	29.23	18.7	8.09	11.71	10.95	31.07	9.72	21.06	20.78	16.75	23.57	16.67	8.26	20.86	14.45	14.03	4.18	15.97	19.51	12.64	0	11.72	39.11	23.55		YBR032W	0	0	0	0	0	0	0	0	0	0	0	0	0	0	0	0	0	0	0	0	0	0	0
YBR033W	11.87	3.8	3.28	5.63	4.74	5.22	7.18	6.74	8.19	9.62	4.89	3.97	6.21	5.19	5.34	6.62	5.44	5.38	12.1	9.34	6.64	7.14	9.04	3.51		YBR033W	0.17	0	0.07	0.4	0	0	0.25	0	0	0	0	0	0	0.15	0	0.06	0	0	0	0.21	0	0	0.29
YBR034C	146.98	100.91	66.45	92.65	110.52	125.04	70.58	98.49	108.07	82.18	68.1	65.44	84.12	44.44	65.57	41.09	43.61	45.05	50.91	76.55	51.06	83.33	91.13	60.66		YBR034C	22.4	109.76	79.21	15.26	130.88	78.57	36.33	39.86	0	22.47	60.51	57.46	2.08	40.68	7.22	9.8	18.06	0	25.05	34.26	8.93	60.06	27.14
YBR035C	106.94	31.88	56.88	84.86	34.99	62	80.38	71.82	37.2	81.09	58.61	53.3	51.95	77.22	71.44	70.65	53.49	58.89	75.61	72.17	34.82	49.93	87.19	32.63		YBR035C	55.73	49.13	40.97	68.39	44.39	39.08	67.04	13.85	0	45.84	63.09	41.74	26.48	64.47	7.17	64.47	31.39	128.39	7.81	53.47	15.53	24.68	72.52
YBR036C	62.47	26.33	20.34	33.77	33.76	29.54	32.65	34.16	26.55	29.37	38.73	31.86	30.34	42.21	31.25	37.22	29.87	31.97	60.13	39.65	20.67	34.76	47.51	18.56		YBR036C	30.48	15.68	16.03	30.3	41.58	17.11	41.47	6.54	10.8	32.85	48.21	24.2	7.38	39.96	0	30.27	4.94	0	7.37	40.58	14.66	18.29	37.58
YBR037C	37.87	0	8.54	29.76	19.83	16.2	53.7	33.38	21.64	69.36	32.82	30.56	20.58	39.74	33.15	40.77	39.78	36.4	58.37	41.2	36.6	48.63	64.48	30.22		YBR037C	15.04	4.78	3.94	20.76	9.19	3.67	9.68	0	0	3.61	13.19	7.54	0	9.35	1.27	12.07	14.82	0	0.79	12.49	0	2.66	14.73
YBR038W	5.08	1.44	2.81	0.98	3.1	0.93	1.8	1.93	3.69	9.43	7.28	3.59	7.66	6.54	4.41	13.48	10.82	10.67	29.52	11.61	9.77	10.86	27.07	5.46		YBR038W	9.94	0.17	0.04	12.52	0	0.26	9.2	0	0	4.31	5.99	3.36	1.09	6.62	0	0.24	0	3.32	0.2	11.99	5.63	0.11	20.49
YBR039W	78.71	26.39	28.53	58.12	38.1	40.45	103.7	65.02	43.11	60.79	51.75	42.35	44.89	55.18	59.34	70.29	58.44	57.25	89.11	52.06	31.24	54.55	99.34	48.19		YBR039W	99.58	58.04	64.1	146.02	74.16	53.93	137.47	45.87	75.79	103.42	128.91	76.41	37.46	87.43	8.3	120.99	55.42	85.01	17.74	131.76	215.89	39.93	120.21
YBR040W	3.63	2.79	0	0.58	2.17	1.26	1.45	2.35	3.41	2.14	2.34	1.42	6.77	5.05	5.17	6.01	4.99	2.86	12.42	5.27	7.85	6.11	4.48	1.75		YBR040W	0	0	0.08	0	0	0	0	0	0	0	0	0	0	0	0	0	0	0	0	0.39	0	0	0.35
YBR041W	28.12	16.11	8.82	23.88	20.74	22.14	28.91	24.34	20.39	20.75	28.73	20.66	11.39	30.69	20.83	21.15	18.74	19.81	32.9	18.43	13.92	18.16	23.84	12.62		YBR041W	7.87	5.71	6.12	13.16	13.8	6.98	9.65	7.47	0	8.23	22.51	13.6	2.59	12.98	0.48	15.66	5.64	9.88	1.8	13.07	8.37	5.89	12.3
YBR042C	81.98	68.41	33.81	62.64	73.22	57.42	50.39	58.89	59.52	65.04	64.34	62.99	51.39	68.94	52.11	45.65	45.47	51.92	63.41	47.28	30.3	59.39	44.02	34.88		YBR042C	8.68	7.09	6.58	10.61	16.75	3.92	9.9	6.79	0	4.16	19.75	6.69	2.95	6.86	0	6.39	5.13	9	2.74	10.54	0	7.05	7.71
YBR043C	24.24	11.43	9.89	23.44	20.69	19.62	24.96	30.29	24.49	26.87	25.92	22.11	22.74	24.63	26.1	28.08	27.44	29.21	36.19	32.87	16.7	30.28	31.77	17.67		YBR043C	1.85	0.38	0.25	3.28	2.49	0	1.7	0	0	0.89	2.82	1.99	0	2.03	0	1.31	0	0	0.29	2.01	0	0.73	1.72
YBR044C	17	6.4	8.3	15.63	10.73	14.2	20.22	15.67	9.67	21.29	10.22	10.27	18.94	13.38	20.17	18.72	20.04	23.39	30.34	19.88	18.03	16.03	21.61	18.53		YBR044C	2.56	0.62	0.54	2.46	1.53	1.06	1.88	0	0	0	1.74	0.53	0.39	1	0	1.39	0	0	0	1.24	9.97	0.9	3.42
YBR045C	16.34	6.78	3.42	12.62	20.73	11.78	17.62	12.41	26.37	8.1	7.28	7.48	6.49	11.97	6.37	8.9	7.84	8.11	14.47	7.94	6.05	9.2	9.82	3.08		YBR045C	0	0	0	0	0	0	0	0	0	0	0	0	0.34	0.22	0	0	0	0	0	0	0	0	0.14
YBR046C	40.86	12.06	4.17	27.71	37.66	28.43	28.85	36.35	41.83	39.22	36.16	25.51	8	23.88	28.9	15.39	11.88	16.07	30.44	22.17	6.8	12.09	38.43	9.62		YBR046C	10.71	10.5	7.39	19.01	36.39	11.12	15.37	8.39	0	14.39	19.65	11.89	8.74	16.93	0	31.75	0	0	4.05	13.02	9.4	11.92	15.66
YBR047W	153.23	118.22	53.68	234.48	247.97	263.82	216.32	175.61	235.84	154.33	134.13	137.04	133.22	143.39	154.39	79.84	109.76	138.34	87.47	107.04	76.64	83.32	107.46	117.89		YBR047W	2.62	0.71	1.43	2.07	5.07	0.7	1.93	0	0	0	1.78	2.43	0	4.61	5.31	5.45	0	0	3.31	4.09	0	2.78	3.76
YBR048W	319.77	199.83	138.6	318.47	337.15	238.05	345.11	336.81	329.51	318.69	434.94	402.62	260.83	343.83	333.23	258.62	276.8	281.37	290.85	373.45	206.06	208.54	637.42	294.9		YBR048W	616.86	298.53	192.35	730.1	447.93	206.54	684.57	271.65	0	472.49	770.64	552.54	198.59	599.82	33.61	501.37	600.51	436.89	119.35	875.84	596.61	220.1	728.01
YBR049C	19.16	2.61	7.15	14.09	13.42	8.15	25.16	15.08	11.61	30.64	18.66	10.87	23.47	18.93	18.09	31.11	21.42	21.56	41.29	28.47	13.25	23.45	47.06	16.26		YBR049C	8.12	2	0.95	10.52	4.18	2.06	10.81	0	0	4.82	7.74	4.83	1.31	7.81	0.39	6.93	2.29	8.01	1.22	12.04	3.39	1.98	13.74
YBR050C	21.2	2.38	12.7	16.78	10.97	12.95	14.3	16.14	14.19	22.38	10.49	6.92	6.49	9.85	19.55	7.72	11.45	8.83	22.31	14.87	6.66	8.64	22.12	10.18		YBR050C	0.25	2.49	1.05	0.83	0.41	0.28	0.39	0	0	2.03	0.36	0.33	0	0.46	0	0.6	0	0	1.33	0.33	0	1.12	0.61
YBR051W	34.21	0	9.11	9.87	18.34	13.4	16.15	17.62	13.21	13.85	17	6.77	4.66	9.41	10.47	2.86	15.65	10.39	26.79	16.8	11.01	9.63	29.14	4.04		YBR051W	7.2	2.05	1.71	4.48	0	1.54	0	0	0	0	0	0.88	0	0	0	1.07	0	0	0	0	0	0	0
YBR052C	180.94	62.74	127.9	165.12	62.95	95.43	132.77	111.04	57.77	107.82	91.64	70.21	42.57	138.06	100.07	82.8	62.15	101.81	130.92	75.69	54.31	65.97	96.6	80.9		YBR052C	25.86	19.5	20.52	63.56	39.17	26.47	47.57	0	0	47.73	45.27	32.51	13.53	51.53	0	71.37	23.53	20.62	12.55	36.57	0	15.46	44.48
YBR053C	46.45	6.65	16.28	46.24	12.97	14.55	82.67	47.09	20.92	52.44	32.58	16.36	28.88	47.86	53.4	49.86	43.61	56.19	66.4	43.1	36.21	38.85	43.12	39.99		YBR053C	11.8	1.34	1.68	18.62	3.42	0.78	17	0	0	3.77	8.02	3.79	2.68	5.18	1.99	22.84	0	10.19	1.86	19	0	0.87	12.68
YBR054W	213.02	23.26	73.44	259.59	91.23	124.9	283.69	142.81	84.28	114.62	189.22	141.94	55.51	207.22	93.11	159.72	194.12	202.27	107.69	59.1	59.01	69.23	131.73	69.83		YBR054W	91.05	25.94	43.53	97.77	67.73	39.62	123.54	24.26	13.36	97.09	302.28	163.89	70.96	204.49	14.64	280.02	79.4	74.94	28.67	67.36	145.21	36.3	162.13
YBR055C	29.17	7	11.77	16.07	15.32	13.15	14.63	16.86	16.68	13.63	15.68	11.79	11.51	12.68	11.54	17.87	12.53	17.13	25.6	16.08	12.27	12.67	20.64	10.12		YBR055C	1.9	3.85	2.83	3.27	6.8	2.66	2.41	0	0	0.99	4.69	2.29	0	1.97	0	1.76	0	3.58	1.09	2.69	0	2.38	3.07
YBR056C-B	251.5	207.93	266.28	134.61	14.06	310.9	230.22	341.81	471.45	71.58	110.9	77.14	120.43	133.22	357.27	149.4	72.34	258.28	233.18	353.58	122.92	0	98.66	1.21		YBR056C-B	0	0	17.26	125.7	0	48.67	0	0	0	119.02	42.12	0	0	0	0	0	0	0	0	0	1088.45	11.98	25.83
YBR056W-A	121.96	106.03	102.1	144.41	292.29	148.34	53.32	289.01	326.71	162.07	84.75	116.51	262.11	112.76	231.3	168.68	167.03	145.51	249.91	224.04	34.25	264.49	65.27	88.26		YBR056W-A	0	91.84	56.24	21.15	43.41	55.12	27.58	0	0	0	0	11.56	0	16.46	0	21.23	0	0	0	116.79	0	9.62	24.43
YBR056W	79.66	41.66	72.72	121.93	47.03	64.72	147.43	108.52	54.07	112.35	95.87	63.68	65.1	150.39	119.23	96.72	96.2	111.97	125.2	86.26	61.23	90.42	73.01	90.27		YBR056W	14.86	1.44	3.84	16.68	4.85	2.99	12.15	5.17	8.55	10.14	14.58	8.86	6.29	17.69	2.01	31.43	0	0	2.5	15.23	5.8	3.03	14.58
YBR057C	59.26	62.53	53.15	66.84	82.87	73.11	82.49	85.3	88.66	90.23	67.95	62.89	81.93	80.25	70.97	63.3	83.93	66.48	88.56	83.62	57.73	99.28	88.1	68.8		YBR057C	3.35	6.78	8.3	13.59	14.04	7.64	4.23	14.99	0	10.1	9.1	8.86	1.3	5.46	0	4.34	0	0	2.42	11.03	16.8	7.1	10.15
YBR058C-A	942.86	3191.17	1784	2746.12	4441.91	2268.77	3078.94	3194.5	3403.71	2863.79	3570.42	2538.05	3344.92	2826.53	2153.09	2441.99	3064.55	1681.89	2251.85	3323.7	2424.07	3364.47	2253.85	3521.1		YBR058C-A	120.95	122.29	119.2	143.11	233.43	114.92	152.54	135.29	0	82.9	193.63	103.89	11.75	227.55	17.5	117.44	0	0	65.39	134.57	0	112.9	143.61
YBR058C	23.48	3.62	5.88	11.54	13.08	11.49	11.96	15.43	11.88	13.1	12.31	12	10.01	14.52	9.66	14.36	10.94	11.45	23.97	12.98	8.94	11.92	19.24	7.42		YBR058C	5.83	8.1	5.69	9.2	14.9	7.7	6.95	0	0	4.24	14.07	9.36	1.37	11.3	1.22	7.9	0	0	1.78	8.02	3.53	5.82	10.6
YBR059C	15.47	4.35	5.92	11.62	7.64	7.37	15.58	10.42	8.84	11.3	11.15	9.66	6.04	12.39	8.74	12.54	11.13	9.13	25.77	9.58	8.94	11.69	24.31	5.35		YBR059C	4.97	1.73	0.96	8.49	5.01	4.04	6.7	2.16	0	2.91	12	5.58	1.5	8.6	0	7.66	1.63	2.86	1.22	7.74	9.69	3.66	8.94
YBR060C	16.14	1.17	1.52	11.59	13.68	7.68	12.52	13.66	12.21	13.91	11.29	8.34	10.85	10.92	9.48	17.76	12.03	9.38	24.17	13.74	10.87	15.01	24.44	6.87		YBR060C	3.89	1.41	1.67	4.09	4.41	2.07	2.1	0	0	0	5.11	2.72	0	2.73	0.53	2.06	3.07	0	0.98	4.53	0	2.75	5.21
YBR061C	70.06	15.9	16.04	34.57	27.92	39.22	17.35	24.25	26.8	16.62	21.15	22.27	21.66	25.12	20.27	18.14	13.63	20.14	23.63	23.27	11.2	17.43	28.99	11.12		YBR061C	11.18	33.3	18.24	9.74	44.04	21.91	14.71	0	15.22	5.64	30.36	17.59	0.8	14.98	0	3.78	20.87	0	5.94	9.9	0	18.28	15.51
YBR062C	279.1	288.33	266.5	329.89	255.91	218.59	273.89	252.33	212.99	242.38	212.22	181.47	146.15	204.91	151.59	156.96	184.65	139.55	153.38	151.27	119.51	145.21	151.89	151.91		YBR062C	8.78	15.03	9.94	12.87	10.66	3.34	9.23	19.65	0	7.23	11.08	6.58	3.41	5.51	5.08	18.01	0	0	4.75	10.95	0	7.54	10.07
YBR063C	29.96	11.49	11.59	18.03	19.9	21.61	17.4	24.26	19.36	19.72	12.07	11.7	26.65	16.43	18.93	30.34	25.19	24.52	30.96	23.8	9.15	21.59	20.94	11.65		YBR063C	0	0	0	0	0	0	0	0	0	0	0	0	0	0	0	0	0	0	0	0	0	0	0.24
YBR064W	4.23	0	0	8.6	9.45	2.88	8.39	0	0	4.86	0	0	0	4.05	0	0	6.01	0	3.59	0	4.87	0	9.53	0		YBR064W	0	0	0	0	0	0	0	0	0	0	0	0	0	0	0	0	0	0	0	0	0	0	0
YBR065C	12.72	6.51	7.51	6.34	8.89	7.87	7.67	9.47	10.12	10.56	8.21	4.7	6.23	7.56	7.72	8.75	5.34	7.79	14.41	9.39	7.95	8.84	16.41	10.02		YBR065C	2.89	3.41	3.23	4.18	7.07	4.36	5.32	0	12.47	4.62	4.91	2.38	0.66	2.96	0	2.91	5.7	0	1.82	3.3	0	2.55	3.31
YBR066C	267.52	217.95	251.96	138.69	194.63	159.84	96.3	146.35	163.5	327.21	128.57	121.73	166.7	171.2	116.92	144.28	167.84	168.97	187.26	176.72	153.57	256.01	173.97	184.77		YBR066C	8.37	16.72	17.16	9.54	17.24	6.44	5.48	0	0	3.57	12.01	6.6	3.8	7.35	0	4.57	0	0	1.17	6.96	0	9.2	7.47
YBR067C	298.85	255.42	160.85	160.44	146.88	172.58	38.2	165.94	142.43	130.18	132.44	144.41	35.64	64.97	37.05	45.39	28.07	40.19	110.09	56.32	30.31	81.41	219.15	31.98		YBR067C	240.73	1078.82	846.22	269.93	1371.54	1399.69	100.26	919.12	308.87	95.45	1342.41	983.42	219.24	606.14	94.68	317.02	376.47	185.61	317.51	132.64	296.78	586.74	269.73
YBR068C	91.33	38.16	42.29	58.87	71.16	46.82	79.21	69.34	71.56	69.59	70.82	57.26	43.73	58.84	63.3	55.14	51.75	49.9	60.97	60.1	26.55	49.68	98.6	25.28		YBR068C	24.09	27.24	20.36	22.97	48.84	27.33	29.79	8.29	0	20.32	43.69	25.96	3.96	36.02	4.29	37.18	21.91	10.98	6.34	35.96	4.65	17.02	30.35
YBR069C	38.28	25.76	31.39	22	22.39	32.27	16.55	23.57	26.41	19.93	21.81	19.39	17.33	15.83	22.53	20.21	12.31	21.3	26.43	27.37	9.9	18.7	21.85	15.48		YBR069C	18.45	25.05	17.68	19.68	47.76	31.81	31.55	16.28	6.73	12.47	31.07	20.68	3.54	16.66	2.11	8.83	6.15	10.78	3.61	33.69	0	21.57	23.09
YBR070C	10.33	0	1.63	6.7	3.68	2	6.67	12.76	5.46	16.43	19.04	17.32	9.18	17.37	15.76	17	12.67	8.71	30.09	12.25	12.77	11.83	17.62	6.33		YBR070C	7.54	0.46	0.69	7.27	3.88	0	8.02	0	0	6.44	11.96	6.2	2.28	5.15	0	5.38	0	0	2.12	8.88	0	0.89	3.84
YBR071W	14.49	13.35	9.62	33.45	24.31	6.05	74.49	70.18	29.18	115.05	84.78	87.87	57.03	101.13	103.51	68.46	64.71	81.34	89.5	79.99	52.68	66.91	132.45	83.15		YBR071W	18.77	1.08	0.13	12.47	1.53	0	15.99	0	0	5.69	28.18	16.75	1.34	20.82	0	7.83	0	0	0	21.54	0	0.35	13.59
YBR072C-A	0	0	0	0	97.8	18.93	52.11	35.29	0	32.07	35.1	31.92	0	0	19.37	94.03	56.07	21.41	23.77	67.74	70.64	0	0	0		YBR072C-A	0	0	0	0	0	0	0	0	0	0	0	0	0	0	0	0	0	0	0	0	0	0	0
YBR072W	30.67	4.36	22.63	16.84	11.91	6.59	146.88	118.49	52.34	519.55	29.32	34.44	86.71	41.94	118.94	65.85	127.79	115.08	146.43	58.93	33.18	58.73	94.7	110.76		YBR072W	106.48	10.54	9.39	155.77	8.97	5.15	70.5	0	0	135.61	15.78	56.12	201.49	17	7.84	114.77	45.79	100.34	7.33	59.11	84.94	13.33	61.04
YBR073W	13.24	5.81	4.08	15.16	10.49	10.53	11.7	13.7	6.94	12.83	16.48	12.86	8.5	22.98	14.03	15.26	13.48	14.89	15.09	13.44	8.19	14.79	10.05	9.15		YBR073W	0.32	0	0.37	0.76	1.24	0.43	1.78	0	0	1.24	3.17	1.84	0.44	1.84	0	0.61	3.81	0	0.2	1.1	0	0.23	0.92
YBR074W	44.04	17.08	22.17	30.17	26.39	25.27	25.46	24.76	21.76	22.59	29.21	22.94	18.56	25.31	17.82	26.84	22.61	21.95	30.93	23.86	15.45	20.51	26.11	13.6		YBR074W	5.06	12.39	12.52	6.61	15.01	7.82	9.53	2.47	0	4.25	15.46	9.21	1.07	9.71	1.28	7.1	5.61	0	2.19	11.42	5.55	8.71	9.06
YBR076C-A	141.59	83.61	96.43	93.1	48.94	52.62	63.75	74.56	55.75	135.54	46.85	35.5	153.96	124.33	118.45	122.87	112.23	142.83	137.48	112.99	125.69	113.49	89.68	64.36		YBR076C-A	6.19	0	5.92	9.76	0	3.29	0	0	0	23.75	8.4	0	0	0	0	2.34	0	0	0	7.71	0	0	7.09
YBR076W	12.29	2.25	0.97	4.45	4.82	5.09	4.67	6.64	4.49	11.21	5.35	5.15	12.4	7.51	12.84	10.11	7.03	8.44	14.7	12.75	6.96	9.85	5.06	3.77		YBR076W	0.5	0	0	0.39	0	0	0	0	0	0	0	0	0	0	0	0	0	0	0	0.31	0	0	0
YBR077C	62.89	26.82	58	60.2	44.49	46.08	69.02	67.04	40.25	67.8	48.85	41.86	53.34	67.31	68.92	48.43	43.51	84.77	80.79	54.37	30.24	39.91	50.71	47.85		YBR077C	19.35	12.97	13.63	28.18	13.79	11.88	17.52	0	0	20	25.28	11.48	0	11.76	0	14.05	0	30.86	1.88	24.12	0	8.41	21.33
YBR078W	42.96	26.74	9.25	36.47	38.26	19.79	35.77	42.42	27.14	66.84	77.65	74.02	46.08	55.66	54.13	43.81	37.88	34.71	110.42	52.75	23.61	35.74	88.9	21.7		YBR078W	447.15	78.2	52.27	455.74	148.47	73.28	458.23	92.96	163.83	347.81	374.4	245.39	122.21	319.3	25.64	129.7	210.6	393.78	36.44	443.82	375.01	81.48	387.2
YBR079C	66.06	21.64	15.6	43.97	59.39	33.88	37.12	50.58	47.3	36.28	51.13	42.54	25.18	36.3	26.81	33.56	33.41	26.68	46.39	35.29	19.52	29.83	91.79	23.32		YBR079C	36.35	69.14	45.33	38.91	94.7	49.09	44.89	15.05	20.72	25.51	88.97	62.96	7.41	62	5.19	24.91	26.51	29.88	11.31	48.89	14.05	44.96	53.88
YBR080C	28.65	5.62	9.71	16.22	16.98	11.73	13.04	19.11	11.86	16.53	15.34	12.16	8.06	14.87	13.23	17.56	13.61	13.11	25.3	14.67	9.5	11.14	25.45	5.89		YBR080C	12.05	15.84	12.35	19.67	21.33	12.38	15.9	6.51	0	11.96	23.14	16.85	4.81	18.79	0	14.43	4.91	4.31	4.19	19.16	0	11.74	18.82
YBR081C	20.27	4.61	12.39	12.71	14.28	9.66	17.45	12.68	15.47	20.17	12.33	8.47	14.02	15.48	12.38	22.08	21.87	17.87	24.66	16.74	16.01	18.12	24.86	11.39		YBR081C	3.18	1.92	1.52	3.85	1.93	1.45	3.34	0	0	1.31	3.16	2.59	0.77	3.09	0.23	2.7	0	2.36	0.57	2.83	0	1.16	4.43
YBR082C	496.43	368.57	396.79	439.58	471.25	352.94	383.18	372.09	515.05	387.39	380.05	434.52	353.47	431.82	364.78	417.78	440.34	454.79	432.19	409.05	293.96	420.04	489.49	452.71		YBR082C	224.56	223.67	154.57	249.92	263.41	139.89	256.14	27.26	90.09	136.97	380.72	170.17	28.42	262.89	7.05	155.79	144.12	180.45	39.53	279.85	91.65	125.43	242.48
YBR083W	16.06	10.79	8	7.4	9.02	6.75	13.46	9.98	13.02	11.24	10.15	6.87	5.45	9.45	9.53	11.13	7.93	6.05	21.93	12.29	15.64	12.07	25.78	8.73		YBR083W	0.68	0.93	0.93	0.54	0	1.27	0.76	0	0	0	0.46	0.84	0	0.3	0	0.26	0	0	0	0.85	0	0.36	0.59
YBR084C-A	829.96	565.67	562.7	727.4	1001.55	710.4	957.08	907	1080.27	755.13	1038.85	1107.81	859.68	1092.88	923.68	925.71	1152.46	1168.05	926.99	1041.34	831	1120.87	1306.28	1092.05		YBR084C-A	442.38	282.55	211.42	544.13	461.38	249.61	536.56	328.12	0	393.06	668.04	398.04	151.87	481.25	78.3	405.79	400.88	281.43	113.36	560.79	166.3	181.75	568.79
YBR084W	81.78	21.38	16.95	35.71	23.78	29.44	23.41	26.89	27.64	22.62	28.35	21.6	22.52	29.31	20.21	32.28	18.97	25.38	30.01	23.79	12.45	27.46	34.28	16.46		YBR084W	16.61	24.55	18.89	23.21	43.72	25.51	28.4	14.86	0	13.97	47.28	35.61	4.3	37.09	1.6	15.35	16.84	13.12	5.59	30.46	19.43	16.87	28.84
YBR085C-A	1294.77	2038.2	1749.35	1502.39	1529.51	1891.98	2125.5	2216.33	1620.42	1850	1387.91	1405.95	1323.32	2010.81	2330.88	1429.39	1641.48	2177.4	1124.34	1237.33	1148.93	1031.32	968.55	1105.88		YBR085C-A	125.29	212.23	169.26	170.22	241.82	166.7	128.03	109.01	0	280.53	236.39	118.06	75.76	342.25	14.1	410.03	164.65	0	35.13	130.12	122.16	113.09	183.54
YBR085W	9.43	0	3.48	7.28	4.71	3.65	3.63	4.91	5.07	12.36	6.01	3.42	6.52	8.6	5.6	9.81	10.8	6.87	20.36	11.96	11.34	8.4	16.4	2.82		YBR085W	1.79	0.97	1.38	2.82	0.46	0.95	3.51	0	0	1.14	1.64	2.02	0.81	2.61	0	0.45	7.04	0	0	5.23	0	0.21	6.49
YBR086C	27.61	8.1	6.69	26.89	20.11	14.95	38.65	30.99	15.71	31.46	41.14	33.66	20.01	44.23	31.34	29.48	25.52	23.45	53.35	30.34	17.43	21.9	40.97	17.15		YBR086C	19.61	2.58	3.39	30.29	13.25	4.78	26.57	10.24	4.23	18.19	39.51	22.12	7.11	32.71	0.33	28.44	13.53	13.55	2.47	30.44	17.21	6.23	31.94
YBR087W	24.86	2.25	4.86	23.21	14.02	13.74	23.11	24.03	12.23	19.83	23.28	20.6	22.83	32.56	25.51	25.49	17.58	29.73	33.23	20.03	10.76	19.7	18.79	11.79		YBR087W	10.97	5.97	3.47	15.73	7.31	2.65	11	7.81	0	12.44	22.01	10.61	2.71	15.32	0	6.96	5.9	0	0.63	20.5	0	4.75	14.29
YBR088C	12.92	0	0	24.84	5.25	4.57	22.56	26.28	9.83	18.2	38.94	31.08	13.63	46.16	32.18	12.43	11.85	20.32	22.81	12.11	11.37	8.45	20.03	12.01		YBR088C	67.22	4.47	2.86	48.31	16.72	1.32	58.25	0	0	54.47	144.08	63.02	17.28	130.51	0	53.8	26.5	0	0	74.04	13.11	2.81	38.53
YBR089C-A	1458.67	768.72	1213.15	1229.09	1104.87	1083.22	716.56	772.72	1113.86	628.56	799.12	734.16	471.27	904.53	607.01	537.16	653.39	613.61	564.66	638.46	417.03	529.38	559.52	483.04		YBR089C-A	93.8	143.84	96.7	155.08	220.84	115.88	53.44	0	0	65.41	182.73	148.85	34.84	101.31	0	74.11	0	0	16.18	138.36	0	100.99	83.13
YBR089W	9.17	4.85	2.1	2.66	0	0	11.34	5.14	0.93	7.29	8.41	4.62	6.07	7.83	8.33	13.02	4.61	5.1	15.88	12.04	1.39	7.57	0	0		YBR089W	0	0	0	0	0	1.53	0	33.72	0	0	0	21.04	0	0	4.36	2.53	0	22.32	1.36	3.97	0	1.65	0
YBR090C	158.59	138.17	243.99	214.36	238.63	197.88	132.08	161.05	261.24	143.38	126.12	153.99	68.83	161.12	119.36	76.8	95.51	91.75	104.01	109.2	77.89	97.58	90.87	116.47		YBR090C	15.38	26.53	11.24	4.02	23.68	9.54	3.75	0	0	9.88	12.18	7.1	3.48	8.93	0	7.75	0	0	16.02	6.41	0	8.17	10.29
YBR091C	65.75	74.23	70.62	75.93	63.72	79.6	46.3	79.43	80.84	72.2	62.38	32.15	68.88	37.25	63.09	61.27	76.39	67.2	95.76	80.25	33.47	32.55	54.93	49.86		YBR091C	13.18	35.88	16.66	23.4	35.62	8.77	14.55	51.61	0	25.3	20.15	9.15	13.45	20.25	0	19.91	0	0	12.47	20.53	57.84	9.31	17
YBR092C	30.5	20.58	4.73	12.4	14.22	11.63	6.09	15.87	8.39	5.9	15.61	13.82	10.8	10.88	5.47	11.12	8.24	13.47	33.49	13.23	8.23	7.02	29.25	4.7		YBR092C	57.06	51.37	37.63	65.25	73.22	40.64	60.84	53.11	27.81	37.27	58	46.08	7.04	48.36	3.09	10.65	52.24	34.73	16.61	59.67	30.95	41.13	124.89
YBR093C	81.19	34.29	44.18	36.32	33.64	42.15	13.76	54.57	25.36	10.32	48.19	47.26	18.61	21.58	16.76	27.61	29.82	36.32	24.47	19.56	14.21	11.54	46.45	5.99		YBR093C	49.36	107.99	72.26	19.58	98.13	76.81	68.83	19.36	0	29.69	127.1	89.72	2.71	76	6.71	25.29	57.47	60.77	23.75	48.78	69.65	76.06	110.47
YBR094W	17.07	4.71	7.75	13.19	8.09	13.24	11.27	17.12	7.33	15.08	10.7	7.57	11.46	12.75	13.69	17.07	14.13	18.6	22.53	14.27	11.43	14.76	18.05	7.52		YBR094W	3.35	2.62	2.06	4.29	5.17	3.23	4	0	0	4.42	5.83	3.68	0.57	5.14	0	3.56	2.47	0	0.79	7.17	3.67	2.22	8.4
YBR095C	51.17	30.22	45.36	45.28	53.07	46.31	54.89	51.81	54.92	58.7	45.32	39.85	55.78	42.13	42.03	54.69	61.24	49.8	52.27	43.24	41.58	72.95	63.49	47.02		YBR095C	4.74	4.08	3.67	3.74	4.87	3.15	4.35	12.36	10.21	3.03	5.36	4.74	0.54	3.46	0.8	3.73	0	8.18	0.5	2.7	0	2.09	5.2
YBR096W	76.41	39.37	34.05	97.8	46.09	78.78	86.36	97	36.31	73.06	86.02	62.18	58.28	99.88	81.83	86.78	56.37	81.71	128.84	86.18	41.05	56.73	53.2	52.07		YBR096W	36.7	13.8	11.34	37.92	15.52	15.81	37.93	0	0	26.83	39.18	19.94	4.76	30.69	3.54	31.35	0	18.12	3.31	41.93	0	12.04	43.58
YBR097W	14.84	3.27	6.66	8.92	6.47	8.71	10.24	9.92	5.81	14.76	7.72	4.58	10	11.65	12.19	16.9	9.71	15.27	19.48	14.95	10	13.16	10.66	6.17		YBR097W	1.45	0.96	0.52	1.63	1.28	0.88	1.3	0	0	0.6	1.48	0.96	0.28	0.82	0	1.25	2.45	2.15	0.13	1.68	0	0.7	2.67
YBR098W	20.51	7.25	6.72	7.78	7.48	6.99	12.82	8.79	11.39	11.93	11.46	7.52	7.55	11.65	8.79	10.53	11.06	9.15	14.77	11.76	8.47	9.6	12.32	7.61		YBR098W	0.92	0.75	0.22	1.45	1.07	0	0.85	0	0	1.06	0.86	0.8	0.44	2.42	0	0.78	0	0	0	1.26	0	0.18	1.98
YBR099C	0	0	0	3.39	0	15.63	0	20.36	0.13	0	0	0	0	9.33	7.53	3.58	3.03	8.58	7.66	0	0	7.95	8.59	0		YBR099C	0	0	0	0	0	0	0	0	0	2.67	0.8	6.32	1.91	0	0	0	0	0	2.94	0.3	0	1.43	0
YBR101C	130.42	72.14	69.88	95.18	78.82	72.78	83.1	91	77.6	90.47	75.17	60.64	75.87	80.85	85.39	90.39	89.72	104	78.28	84.61	44.73	77.73	95.16	72.08		YBR101C	10.89	21.27	19.34	14.15	19.78	12.27	15.55	0	0	7.38	12.62	11.65	4.36	11.25	0	8.95	0	0	1.62	12.77	0	13.12	13.59
YBR102C	14.74	0.94	6.52	6.69	6.99	6.55	11.47	7.43	6.7	12.06	8.45	5.04	9.16	6.7	7.72	12.11	10.76	9.1	20.84	12.23	6.64	10.04	16.08	6.33		YBR102C	2.51	1.14	1.23	4.95	1.94	1.56	2.93	0	0	2.41	3.7	1.36	2.56	2.76	0	2.21	0	0	1.06	5.09	0	1.77	4.68
YBR103C-A	68.52	0	0	0	0	79.45	109.38	74.07	116.92	201.97	73.68	134.02	116.23	146.67	162.59	148.03	0	89.86	249.5	0	0	164.78	0	0		YBR103C-A	0	0	0	0	0	0	0	0	0	0	0	0	0	0	0	0	0	0	0	0	0	0	0
YBR103W	33.98	2.76	14.92	18.73	14.27	19.7	21.67	22.35	13.81	35.86	18.37	11.08	18.6	16.93	21.86	24.21	21	19.69	32.34	24.81	10.11	18.16	24.65	11.3		YBR103W	3.98	1.5	1.8	5.32	3.31	2.45	4.73	0	0	1.76	3.54	3.59	0	4.04	0.62	2.2	3.62	12.7	0.39	4.39	10.75	1.73	2.46
YBR104W	59.89	83.59	56.35	53.64	56.61	101	41.92	87.24	60.93	85.27	53.03	45.41	104.3	58.27	96.89	73.56	62.7	67.83	54.81	118.28	55.44	101.66	71.99	62.97		YBR104W	1.64	4.46	4.4	4.74	7.16	7.84	5.22	0	0	3.14	8.9	3.37	0	2.88	0	1.44	0	11.31	0	2.04	0	3.08	4.07
YBR105C	57.21	43.7	23.63	48.58	59.69	46.37	109.27	83.38	76.98	95.36	52.34	56.78	61.32	60.62	70.24	46.12	40.57	43.3	75.45	55.22	37.57	55.44	120.93	39.91		YBR105C	11.16	45.95	28.96	16.45	36.7	23.49	7.85	30.39	37.65	6.52	23.06	14.21	6.6	20.02	0	16.85	17.21	30.17	5.51	18.74	8.51	14.56	10.84
YBR106W	363.46	327.66	214.84	302.3	282.52	280.16	205.48	299.12	234.34	225.22	326.44	298.21	230.03	265.96	237.66	238.43	176.16	220.27	314.82	257.81	147.46	235.06	208.3	159.75		YBR106W	262.78	260.59	185.58	252.64	396.69	232.25	242.53	146.98	30.36	182.37	443.83	240.21	63.84	320.34	21.38	151.5	208.12	267.54	65.12	288.74	82.35	152.48	237.38
YBR107C	19.74	3.61	3.12	22.22	9.86	8.72	31.13	12.19	14.44	30.01	15.16	11.49	15.93	25.15	15.33	20.31	36.32	22.19	27.72	14.14	15.25	18.08	24.38	11.36		YBR107C	0.8	0.87	0.55	1.26	2.47	0.85	1.77	0	0	0	2.72	0.25	1.09	2.11	0	1.21	0	0	0	2.5	0	0.28	0.92
YBR108W	11.01	2.94	2.86	6.45	4.45	2.94	11.93	6.73	6.62	5.46	7.42	4.5	3.25	7.79	4.66	6.97	7.73	4.65	16.95	6.46	7.25	6.91	10.77	2.63		YBR108W	2.48	1.71	1.32	1.81	1.79	2.35	3.36	0	0	2.51	5.64	1.22	0.69	4.91	0	3.24	5.79	3.38	0.86	3.49	0	1	4
YBR109C	231.61	150.82	92.69	175.66	103.77	161.85	104.81	148.65	75.87	97.53	120.08	103.13	84.19	163.78	128.19	113.92	99.45	127.46	176.2	104.05	58.17	84.54	100.88	59.99		YBR109C	142.73	121.84	89.07	144.56	194.53	91.9	116.67	55.19	0	104.83	201.07	126.61	14.38	167.09	21.41	107.13	83.36	292.26	35.57	159.21	61.85	75.93	117.17
YBR109W-A	6.82	0	22.65	16.4	10.22	15.82	32.67	14.75	5.82	26.81	14.67	6.67	11.57	36.51	16.19	29.48	0	22.37	34.78	7.08	29.52	49.22	8.43	21.99		YBR109W-A	0	0	4.76	0	0	0	0	0	0	0	0	0	0	0	0	0	0	0	0	0	0	0	0
YBR110W	44.68	23.66	16.81	32.28	21.43	25.65	42.33	39.49	21.97	40.44	45.2	32.5	29.87	44.52	45.7	37.24	37.42	41.56	61.07	43.38	18.1	33.34	44.58	21.64		YBR110W	6	3.27	2.25	10.65	5.21	2.79	9.66	0	0	4.32	12.23	5.78	2.04	8.56	1.52	8.36	4.44	0	0.47	10.98	32.91	3.05	10.75
YBR111C	255.87	125.22	174.3	306.76	115.29	186.75	290.47	200.55	111.33	208.33	182.52	154.52	103.75	283.12	211.05	187.55	168.95	221.25	197.47	143.83	99.26	142.18	113.94	121.58		YBR111C	39.96	23.65	31.45	52.08	38.22	24.04	49.21	13.6	44.95	35.01	54.28	45	21.27	58.73	1.76	64.94	10.27	0	6.58	57.91	30.49	21.17	43.32
YBR111W-A	376.79	506.75	337.86	592.88	642.66	631.41	689.27	790.78	441.14	643.12	564.88	610.52	438.54	768.24	657.5	544.62	510.14	555.45	626.9	559.25	559.4	595.24	387.23	465.41		YBR111W-A	28.12	25.52	22.41	14.79	32.57	17.46	13.79	0	0	17.99	38.2	14.45	0	20.58	0	31.86	0	0	0	32.12	0	19.87	42.99
YBR112C	20.96	13.5	13.46	19.27	24.05	15.9	26.78	26.07	27.06	36.37	27.81	24.03	27.49	25.87	25.88	30.52	31.46	25.54	49.42	31.21	25.14	35.38	52.8	21.03		YBR112C	13.36	4.51	5.88	14.67	10.77	9.75	14.16	5	0	7.58	12.99	8.48	2.46	9.81	0	3.92	9.45	12.01	4	19.37	5.61	5.41	17.59
YBR113W	7.85	0	2.96	7.36	8.15	2.6	6.42	10.68	10.91	14.72	13.9	5.24	8.46	11.67	9.78	6.52	4.65	6.54	26.45	12.03	9.65	6.58	20.11	14.79		YBR113W	1.57	9.02	4.51	1.25	1.22	0	1.14	0	39.33	11.67	1.06	1.53	0	2.7	0	0.59	0	0	0	3.9	0	2.93	4.49
YBR114W	12.7	7.16	4.64	9.24	13.44	9.93	13.21	16.37	14.71	12.14	9.15	6.15	8.7	8.11	10.16	9.4	9.01	8.56	19.94	10.15	7.56	9.25	17.99	7.14		YBR114W	0.4	3.57	2.44	1.72	5.83	4.65	2.34	0	0	1.91	2.02	1.22	0	2.09	0.4	2.32	0	0	0	1.98	0	2.03	1.82
YBR115C	4.52	0.98	1.27	1.94	1.14	2.51	2.49	3.1	2.12	3.75	1.64	1.74	1.94	2.38	2.76	4.4	1.42	2.75	5.47	2.91	3.44	2.6	5.03	1.44		YBR115C	4.12	2.54	2.61	3.85	3.35	2.94	6.7	3.4	0	3.54	5.45	4.25	1.18	4.67	0	2.7	3.85	0	1.09	5.81	5.71	1.92	6.65
YBR116C	8.84	5.91	12.67	8.39	14.86	17.24	12.98	19.77	21.32	5.34	7.93	8.2	14.18	8.74	13.43	13.56	16.1	15.48	24.84	16.23	0	25.64	16.33	8.4		YBR116C	4.24	0	0.18	2.96	2.03	0	1.13	0	0	4.82	0.89	0.95	3.84	2.31	0	10.59	0	0	1.46	3.81	0	0.92	0.66
YBR117C	3.91	0	0.48	1.91	0.23	0.59	10.06	8.04	3.11	13.6	3.16	1.62	2.59	2.55	7.86	4.79	3.02	2.1	12.06	4.65	4.45	4.67	5.05	2.26		YBR117C	4.15	0.38	0	3.71	0	0.25	2.04	0	0	0.94	1.27	1.49	7.27	3.9	0	12.59	0	0	0.62	0.92	0	0.08	1.36
YBR118W	361.1	207.96	91.15	250.84	179.59	163.55	215.21	221.57	150.34	217.31	278.34	241.52	179.03	249.39	225.96	261.99	191.9	236.48	297.33	270.82	100.37	115.24	455.91	102.52		YBR118W	1321.27	564.61	369.29	1415.12	742.76	454.82	1430.55	1026.74	0.01	895.34	1117.71	1036.01	552.19	930.09	155.7	792.43	1220.96	1926.71	240.57	1503.05	1401.63	360.68	1470.44
YBR119W	56.98	25.08	34.94	74.46	58.17	55.34	72.13	62.77	50.47	60.98	50.34	45.43	49.25	63.31	57.27	55.66	61.08	65.44	61.85	52.34	42.41	51.49	60.06	33.92		YBR119W	3.09	3.7	3.89	7.32	3.34	1.32	4.1	0	0	2.37	5.46	3.24	0	4.34	0	6.07	0	0	1.56	3.08	0	3.71	8.51
YBR120C	180.82	248.13	220.42	208.61	215.89	222.32	210.55	243.61	213.89	232.59	171.9	166.57	213.37	231.85	235.78	196.88	262.54	233.12	216.29	204.81	202.24	256.28	173.7	212.58		YBR120C	10.42	10.54	11.59	18.79	14.94	6.34	12.05	0	0	14.28	6.07	7.34	4.05	7.84	3.01	11.24	0	0	1.88	13.91	0	6.84	16.21
YBR121C-A	0	0	0	0	0	0	0	0	0	0	0	0	0	0	0	0	0	0	0	0	0	0	0	0		YBR121C-A	0.65	0	26.86	121.65	161.94	0	165.01	0	0	0	30.09	0	0	89.49	0	188.58	0	0	19.55	92.65	418.61	0	111.17
YBR121C	155.08	101.28	88.53	108.53	91.24	90.97	80.88	81.01	81.78	65.64	87.08	70.54	55.71	90.27	54.7	80.54	61.95	83.84	96.79	80.95	49.5	69.52	99.49	43.88		YBR121C	66.25	58.73	47.5	87.26	102.22	50.28	88.4	41.2	49.51	57.38	139.43	93	15.94	100.04	6.3	62.67	33.94	39.67	16.22	89.96	36.16	48.24	105.14
YBR122C	173.17	145.13	138.08	158.16	109.87	117.49	146.66	127.51	153.55	133.73	101.64	82.08	101.3	102.78	109.45	99.1	127.28	103.14	121.7	123.95	88.36	114.56	140.09	152.34		YBR122C	11.6	15.44	14.96	19.32	20.89	13.72	21.81	0	66.69	7.42	22.76	15.1	8.77	7.92	5.22	15.09	15.24	26.72	3.25	12.85	0	10.01	17.73
YBR123C	18.26	8.89	5.76	18.19	17.55	13.84	23.66	19.21	14.67	30.91	20.24	12.01	23.8	25.13	21.8	29.39	26.59	28.31	37.48	27.44	21.37	35.83	39.55	14.46		YBR123C	2.22	1.07	1.18	5.56	1.52	1.57	4.35	0	0	1.42	3.85	2.51	0.67	2.6	0	2.42	2.92	0	0	3.23	0	0.7	6.08
YBR124W	20.08	0	15.67	5.13	11.84	0.92	10.16	12.17	8.25	22.51	11.72	9.35	16.07	12.99	11.19	14.62	13.51	6.83	33.55	19.89	12.74	11.42	42.11	7.61		YBR124W	2.68	0	0	2.98	0	0	0	0	0	0	0	0	0	0	0	0	0	0	0	0	0	0	0
YBR125C	32.47	11.87	15.4	17.55	11.58	16.28	23.45	22.28	9.89	32.16	17.46	14.62	19.67	14.07	16.66	19.11	14.16	22.98	34.34	13.37	13.38	16.73	30.55	10.8		YBR125C	4.39	1.91	2.1	4.85	5.76	6.54	5.82	0	0	3.37	5.97	4.6	1.79	7.33	0.89	4.48	5.19	9.11	1.11	4.38	7.71	2.17	6.29
YBR126C	68.78	15.09	17.62	68.04	37.09	30.65	115.29	83.91	38.56	77.43	72.91	53.04	27.34	95.28	69.02	55.9	64.47	56.57	98.04	47.71	26.79	38.75	111.17	30.41		YBR126C	53.25	10.94	17.02	86.39	34.91	27.98	54.7	15.74	0	59.13	95.54	62.79	37.36	147.33	3.39	178.7	39.61	41.66	19.01	53.84	47.02	22.71	62.01
YBR126W-A	310.64	222.51	231.8	343.25	146.36	258.45	361.7	235.43	189.58	371.38	330.3	245.24	217.7	370.83	287.41	327.52	306.29	288.14	373.8	237.15	271.76	69.7	331.39	358.11		YBR126W-A	150.41	136.6	88.71	238.85	142.79	17.76	185.25	257.84	1704.1	193.78	215.88	143.95	46.23	281.86	0	190.54	194.72	0	0	335.09	288.95	89.16	280.44
YBR126W-B	606.11	526.06	403.42	695.42	296.18	391.49	223.78	552.21	0	732.09	752.04	404.82	83.16	1036.54	684.93	390.79	651.98	697.07	1540.36	521.7	0	0	442.32	0		YBR126W-B	2086.14	429.88	375.84	2174.89	610.01	495.48	2809.87	1828.8	0	3556.02	2593.3	1031.54	943.12	2614.83	0	1911.63	0	0	147.33	1261.49	0	687.45	1625.65
YBR127C	90.49	51.67	45.31	81.5	64.69	51.7	102.21	79.42	66.51	102.86	92.68	71.48	47.89	83.64	74.41	74.04	71.6	72.08	112.87	82.04	63.11	61.59	182.18	58.45		YBR127C	204.23	76.15	67.81	239.52	121.75	79.52	211.43	49.9	16.49	155.92	185.03	128.41	68.49	173.72	9.03	138.84	120.58	158.53	29.34	235.45	139.79	63.02	227.75
YBR128C	40.6	11.63	32.19	40.31	19.97	19.85	70.14	37.67	23.01	68.18	24.76	18.67	34.44	49.62	44.4	37.31	52.56	47.69	56.49	34.89	34.75	29.88	29.57	32.23		YBR128C	1.55	0.56	0.56	1.22	0.8	0.82	0.38	0	0	1.98	1.4	0.48	0	0.45	0	2.53	0	0	0	0.97	0	0.55	1.48
YBR129C	119.91	49.36	55.5	83.47	79.45	82	60.04	80.97	49.37	65.38	67.76	50.3	64.89	73.63	65.98	62.96	54.66	69.56	92.94	75.37	48	59.53	60.35	50.26		YBR129C	4.38	5.37	5.99	8.21	13.11	5.83	4.84	8.58	0	4.21	6.7	3.38	0	8.18	0	5.59	0	0	0.69	5.8	0	4.26	6.91
YBR130C	15.03	9.01	7.02	14.49	13.72	10.07	23.24	15.48	16.43	27.68	22.72	18.83	23.89	16.33	19.08	20.79	20.97	19.4	35.22	21.19	16.76	24.28	41.17	12.49		YBR130C	6.8	1.96	2.24	9.15	6.8	4.05	9.42	0	0	3.84	6.79	3.45	2.18	5.27	0	3.93	14.2	0	1.01	7.48	7.02	2.54	11.7
YBR131C-A	0	0	0	0	0	0	0	0	0	0	0	0	0	0	0	0	0	0	0	0	0	0	0	0		YBR131C-A	0	0	0	0	0	0	0	0	0	0	0	0	0	0	0	0	0	0	0	0	0	0	0
YBR131W	11.37	4.06	6.58	10.81	10.1	9.73	11.5	10.86	11.28	11.95	9.38	6.21	8.75	12.17	9.96	11.33	9.99	11.36	17.81	15.64	9.44	9.54	14.21	4.26		YBR131W	1.8	1.59	1.88	1.24	1.91	2.4	0.99	0	0	0.43	3.67	0.76	0.61	1.19	0.46	1.11	0	0	0.28	3.09	0	1.35	1.94
YBR132C	23.87	14.66	11.62	13.9	14.78	9.32	14.1	13.76	12.22	13.91	10.78	7.31	5.67	10.73	9.53	10.43	9.84	8.14	23.87	16.67	13.43	7.27	12.97	5.39		YBR132C	5.15	3.25	4.41	7.27	9.42	7.22	6.98	0	0	3.64	6.81	3.34	1.84	7.14	1.1	8.4	3.21	5.62	2.39	6.59	0	6.23	5.6
YBR133C	11.2	5.11	6.26	7.91	8.14	5.98	7.42	8.99	8.89	14.27	7.39	6.72	10.53	8.54	10.52	15.73	10.85	11.99	21.72	14.49	15.11	11.73	21.22	5.18		YBR133C	3.78	0.82	0.75	4.77	4.81	4.22	4.73	5.92	0	1.81	5.13	3.44	0.77	2.82	0.38	1.71	2.23	3.92	0.24	7.3	0	1.47	5.85
YBR134W	6.24	9.58	0	3	1.87	0.72	2.99	2.7	3.19	2.45	2.7	1.22	2.12	5.34	5.92	5.4	2.14	3.27	10	1.29	5.4	0	1.54	2.01		YBR134W	0	0	2.03	1.68	1.64	0	1.56	0	0	4.08	0	0.66	0	0	0	0	0	0	0	0	0	0	0
YBR135W	51.86	53.6	6.62	55.15	52.29	35.85	53.33	56.06	60.41	60.75	49.33	36.09	38.91	39.49	40.82	34.48	32.54	35.97	64.64	45.53	23.74	33.58	48.04	17.68		YBR135W	37.39	19.44	19.99	40.23	51.24	32.56	42.52	0	0	26.1	46.19	37.75	9.25	29.85	6.88	22.47	0	35.24	6.43	37.07	0	16.21	32.15
YBR136W	4.51	1.69	1.83	2.23	1.7	1.53	2.96	1.51	2.16	2.88	2.96	1.43	2.43	2	2.44	5.2	2.65	3.44	8.31	3.12	4.84	3	3.67	1.95		YBR136W	0.69	0.68	0.5	1.04	0.72	0.13	0.74	0	0	0.36	0.93	0.54	0.51	1.48	0	0.73	0	1.3	0	0.9	0	0.31	1.25
YBR137W	92.86	45.63	69.06	91.68	45.62	77.09	117.99	114.83	43.1	102.18	84.68	53.76	80.65	128.8	121.63	88.8	85.48	126.16	135.25	84.78	61.08	60.74	59.64	74.23		YBR137W	8.86	7.58	7.96	29.96	18.57	4.72	28.87	0	0	14.58	18.06	8.98	6.89	18.9	2.56	19.6	29.95	0	4.79	22.88	0	8.05	24.67
YBR138C	4.23	1.41	0.61	2.07	3.31	1.39	3.82	5.57	1.88	18.45	8.51	4.14	22.17	10.25	12.67	24.13	23.08	29.7	34.99	23.68	21.51	19.04	27.51	11.27		YBR138C	1.25	0	0	2.72	0	0	1.38	0	0	0.6	1.07	0.29	0	1.38	0	0.12	0	0	0	3.91	0	0.11	5.4
YBR139W	28.99	5.86	10.13	23.24	10.86	9.62	35.17	22.27	8.95	31.11	23.18	16.98	11.65	30.83	23.65	26.65	26.54	24.77	52.23	22.96	16.51	23.39	42.17	16.29		YBR139W	20.16	3.89	6.62	36.67	5.52	1.38	28.46	0	0	21.84	20.98	11.23	4.42	25.69	0.66	34.86	3.84	40.44	2.05	29.17	0	4.13	37.83
YBR140C	13.75	8.57	6.58	9.77	9.4	9.15	9.62	11.43	9.74	9.02	9.6	7.97	7.15	11.56	7.61	12.29	9.77	9.71	18.41	9.52	7.43	12.07	12.78	6.38		YBR140C	2.33	1.63	1.61	2.1	4.11	1.9	2.55	2.23	2.46	0.82	4.91	3.46	0.52	4.51	0.39	2.48	0.56	0	0.72	2.93	1.67	1.98	3.6
YBR141C	13.99	4.77	8.26	9.71	13.5	10.99	12.65	15.79	15.12	13.13	8.02	10.03	15.29	5.32	10.51	13.65	9.61	12.64	15.84	13.22	4.04	13.45	16.51	6.51		YBR141C	1.06	8.08	4.63	0.84	12.68	7.33	3.12	8.3	0	1.02	5.04	3.1	1.44	3.72	0	0.2	0	0	1.34	4.29	0	3.55	3.34
YBR141W-A	0	0	0	0	0	0	0	0	0	0	0	0	0	0	0	0	0	0	0	0	0	0	0	0		YBR141W-A	0	0	0	0	0	0	0	0	0	0	0	0	0	0	0	0	0	0	0	0	0	0	0
YBR142W	97.25	60.46	83.59	50.11	60.05	64.47	22.76	45.66	63.93	19.93	33.75	28.94	27.93	30.65	21.73	31.02	21.31	27.15	25.81	30.7	19.36	35.87	32.86	20.77		YBR142W	5.9	22.36	17	3.21	32.5	15.91	5.69	12.74	5.26	3.9	21.41	15.18	1.66	12.14	1.65	2.38	2.4	0	3.08	7.98	3.57	14.51	5.36
YBR143C	279.9	170.93	153.13	181.89	142.59	193.62	97.01	146.12	144.6	86.39	117.02	119.09	77.08	152.94	109.57	96.36	86.62	123.65	133.19	111.49	66.37	105.45	111.4	109.11		YBR143C	68.53	94.23	74.63	65.06	141.09	82.83	69.79	30.32	50.09	45.33	129.13	91.82	16.86	91.79	13.33	48.83	18.32	64.22	24.91	73.34	40.77	63.32	73.46
YBR144C	13.1	0	14.5	15.75	6.54	17.72	12.2	30.69	22.36	6.44	23.48	10.68	7.41	30.38	11.66	14.15	11.25	10.02	17.49	15.86	14.18	15.75	5.39	10.56		YBR144C	0	0	0	0	0	0	0	0	0	0	0	0	0	0	0	0	0	0	0	0	0	1.31	0
YBR145W	28.38	18.15	12.76	17.53	9.3	14.22	12.03	20.77	13.37	19.46	12.4	17.63	7.02	19.61	17.01	13.62	11.68	14.34	25.19	13.8	12.15	12.79	24.09	7.15		YBR145W	5.04	2.75	2.34	3.98	4.28	1.07	2.6	0	0	2.9	4.45	3.88	2.06	2.65	0	1.52	0	0	0	5.65	0	1.78	4.04
YBR146W	59.16	21.34	21.09	27.36	26.76	24.63	32.96	26.18	25.41	34.72	21.78	20.97	28.96	22.52	24.5	24.59	17.05	26.56	38.75	28.01	21.48	24.83	49.53	21.12		YBR146W	20.98	11.05	15.53	22.42	16.72	14.76	13.94	10.6	0	9.09	18.84	9.39	2.76	10.69	0	12.52	0	0	0.85	14.34	11.88	9.08	15.9
YBR147W	89.69	53.4	91.16	73.34	43.87	61.55	103.72	104.86	47.47	91.72	56.29	39.38	39.74	91.68	90.12	44.55	46.53	49.45	59.98	60.77	38.81	31.69	40.24	47.2		YBR147W	0	2.38	2.3	1.97	2.41	0.66	1.38	0	0	3.59	2.97	4.04	3.4	9.31	0	8.72	0	0	0.79	1.94	0	3.53	1.07
YBR148W	11.96	5.96	10.31	7.97	6.51	4.68	8.8	6.55	7.29	6.1	5.01	3.49	6.32	6.32	4.88	9.27	5.6	7.23	11.65	6.93	4.71	8.22	5.37	3		YBR148W	0.53	0.29	0.22	0	0.2	0.14	0	0	0	0	0	0	0	0	0	0.1	0	0	0	0.16	0	0.28	0.3
YBR149W	66.06	9.31	23.14	49.05	24.06	24.95	71.35	51.1	23.01	45.85	42.03	23.71	14.39	54.81	41.7	32.95	22.9	29.01	55.17	33.01	16.39	19.67	50.9	18.56		YBR149W	59.39	30.08	33.72	78.21	44.25	40.4	74.46	16.17	66.81	59.46	105.58	62.1	31.62	108.37	4.18	130.84	30.54	10.71	18.89	72.4	72.5	32.28	64.83
YBR150C	21.67	10.08	11.45	12.5	18	15.13	15.64	12.6	15.02	15.96	12.89	8.67	10.51	14.69	11.55	20.04	15.97	15.16	26.62	15.18	11.9	19.65	16.26	11.25		YBR150C	0.98	1.14	0.84	1.43	1.41	0.37	0.82	0	0	0.48	1.33	1.04	0.57	0.98	0	0.57	0	0	0.35	1.31	0	0.49	1.52
YBR151W	131.38	41.38	69.34	126.34	75.69	84.95	131.74	113.97	78.46	100.62	126.78	101.79	56.57	130.87	95.92	86.11	79.84	104.04	121.92	87.72	55.4	59.14	105.68	80.35		YBR151W	14.35	4.06	5.49	24.91	22.6	6.72	18.16	0	29.71	8.81	25.35	17.7	9.37	15.11	0	26.66	6.79	0	5.07	15.38	0	8.92	28.3
YBR152W	26.94	2.87	8.7	20.69	36.43	19.09	28.67	30.74	40.86	27.94	23.34	17.56	19.68	20.82	19.31	23.44	25.71	15.95	32.7	24.07	10.53	22.5	42.52	13.87		YBR152W	1.28	1.74	2.26	3.52	2.46	0.34	0.94	0	0	3.67	4.33	1.57	0.87	2.8	1.29	1.44	0	13.22	0.8	2.38	0	2.7	1.83
YBR153W	44.43	10.89	25.11	26.51	19.11	24.39	36.21	34.74	19.35	24.61	22.36	24.96	13.63	29.34	25.51	31.31	30.03	35.02	43.37	29.91	20.45	30.69	43.78	16.76		YBR153W	8.05	3.07	1.98	5.08	2.49	1.29	7.7	0	0	0	6.56	0.99	0	0.71	0	2.74	0	0	1.02	5.02	14.14	1.71	6
YBR154C	530.34	454.79	447.69	681.36	600.86	562.92	502.09	503.13	593.04	463.42	487.78	444.14	510.1	423.28	357.78	370.91	431.2	410.64	313.49	480.55	288.11	484.36	404.15	502.82		YBR154C	28.85	37.69	55.43	47.03	89.04	50.15	50.93	90.35	0	38.75	79.02	37.66	13.08	48.96	5.84	24.33	45.49	19.93	13.34	56.92	33.75	40.07	53.46
YBR155W	42.26	28.39	38.59	41.28	60.93	65.85	23.82	58.82	58.6	29.07	44.31	36.94	41.67	37.88	40.43	45.27	33.57	34.3	39.82	43.85	17.72	37.48	61.01	33.63		YBR155W	4.5	16.42	12.05	6.75	26.41	9.82	7.62	14.1	0	6.05	12.23	6.52	1.84	6.32	0.91	0.68	0	0	2.84	5.33	0	9.38	6.19
YBR156C	3.6	2.05	3.1	2.25	3.2	0.85	6.18	4.33	3.3	9.44	5.17	3.13	5.21	5.14	7.13	7.59	3.44	6.04	13.9	7.06	6.35	6.74	12.03	2.15		YBR156C	2.05	0	0.19	2.15	0.53	0	1.67	0	0	0.44	1.24	1.54	0.31	1.4	0	0.77	0	0	0	1.84	0	0.32	1.3
YBR157C	35.62	10.25	36.95	24.26	18.01	17.04	55.08	53.9	41.02	53.8	22.98	14.8	33.23	18.1	30.9	29.17	30.59	28.02	59.66	36.95	25.05	39.61	29.14	33.01		YBR157C	1.52	1.24	1.66	4.79	0.59	1.62	2.23	0	0	1.46	0.52	0.23	1.03	0.67	0	2.01	8.97	0	0	3.78	0	1.61	2.17
YBR158W	5.94	1.34	1.74	2.52	4.97	3.34	7.94	9.25	6.55	9.09	7.7	4.1	14.81	11.4	11.29	33.06	24.89	30.34	35.98	31.52	11.33	31.07	36.66	29.82		YBR158W	9.22	0	0.2	8.21	0	0	7.44	0	0	4	2.63	0.64	0	2.61	0.6	0.11	0	0	0	13.35	0	0.21	9.72
YBR159W	71.65	48.33	31.85	92.01	52.54	74.39	96.43	99.48	49.36	90.43	99.94	82.97	83.4	107.48	107.06	101.46	71.05	104.19	135.36	102.95	57.73	88.67	77.38	61.36		YBR159W	36.27	7.79	6.91	41.91	16.57	6.8	45.86	24	0	29.42	42.68	19.69	11.12	32.75	4.14	28.94	18.13	31.78	3.87	39.16	35.87	7.58	43.64
YBR160W	48.27	8.36	15.66	28.79	22.29	15.36	35.34	30.21	26.32	39.94	41.76	26.97	27.7	39.62	38.32	26.66	24.31	27.13	44.93	31.25	24.34	27.06	46.17	16.38		YBR160W	11.75	8.76	5.66	12.69	21.49	6.25	13.65	0	0	5.93	23.95	18.69	2.52	17.92	1.25	12.61	0	0	2.34	17.73	0	7.65	15.6
YBR161W	16.85	6.26	7.22	19.17	7.33	11.19	20.18	19.68	10.67	23.77	19	15.95	22.13	28.51	25.64	20.55	17.74	24.42	32.26	25.38	10	11.11	17.79	13.14		YBR161W	3.24	1.26	1.58	7.67	1.79	3.2	4.77	7.25	0	6.22	4.72	4	0.63	4.07	0	4.55	0	0	0	7.22	0	1.64	4.25
YBR162C	13.65	8.32	13.67	5.56	11.36	6.28	10.72	15.93	12.39	26.19	25.63	16.95	22.06	22.26	25.32	22.16	21.96	21.46	58.23	32.82	19.47	23.97	40.41	12.57		YBR162C	121.87	15.08	17.86	112.74	10.55	7.66	131.5	5.78	9.56	93.55	56.19	32	21.6	53.83	0	10.88	21.84	68.91	4.66	121.96	77.78	10.44	97.38
YBR162W-A	2177.44	7680.57	7541.96	4423.67	8092.17	5745.44	5833.74	6106.8	10112.2	6892.2	7619.24	6537.57	8225.66	7192.66	7645.41	5949.67	9541.11	6567.76	5828.5	9438.91	9066.51	9198.74	7035.7	13714.4		YBR162W-A	160.47	240.26	191.81	253.17	232.28	74.72	147.57	0	519.03	115.48	190.74	185.56	163.73	140.89	0	113.61	237.23	0	50.61	287.47	0	113.35	264.45
YBR163W	18.04	6.24	5.93	11.98	11.44	10.64	10.38	16.33	10.81	12.93	12.06	8.74	9.92	12.17	11.95	15.33	9.49	11.83	19.05	13.15	9.14	10.55	20.87	4.19		YBR163W	0.55	1.21	1.25	1.75	4.06	2.21	1.83	0	0	0.53	3.2	1.2	1.13	0.73	0	0.94	6.55	0	0.7	2.93	0	1.37	2.06
YBR164C	277.72	347.09	207.29	273.17	276.26	304.54	217.08	329.68	203.27	217.87	269.32	240.01	286.07	323.34	300.98	256.83	257.59	286.57	296.32	279.93	239.13	279.57	206.51	191.99		YBR164C	37.91	37.95	34.92	31.84	58.54	31.24	44.09	19.15	0	23.47	51.5	30.55	16.64	36.51	0	24.48	14.46	25.36	6.17	36.58	21.46	25.05	37.16
YBR165W	168.75	113.32	103.31	104.86	98.6	127.9	120.99	125.49	120.15	141.5	85.37	78.8	120.45	115.7	132.76	114.91	129.49	136.29	139.45	132.44	80.28	130.47	98.54	99.65		YBR165W	8.84	5.92	8.17	5.9	14.7	9.77	5	0	0	3.91	11.54	3.98	2.77	8.95	0	3.34	0	0	1.72	13.56	0	5.28	8.18
YBR166C	105.48	63.71	53.65	89.25	57.57	90.52	69.2	82.62	49.93	65.01	62.94	45.49	73.72	72.22	70.21	67.93	70.51	75.03	83.17	70.01	40.17	61.97	53.94	40.83		YBR166C	5.58	8.71	8.29	12.04	13.22	10.1	8.76	5.83	0	2.14	17.95	9.98	2.03	9.48	1.51	7.03	4.4	0	0.94	10.2	0	7.1	11.09
YBR167C	151.54	121.55	127.66	166.76	110.11	150.77	157.06	156.47	113.85	176.67	143.5	105.06	178.41	153.71	149.6	179.16	167	166.85	164.71	156.04	110.12	157.73	120.12	102.07		YBR167C	3.85	7.35	5.79	4.56	11.9	8.21	7.09	0	0	3.7	5.24	6.54	0	5.08	0	1.46	0	0	0	10.81	0	2.72	7.73
YBR168W	29.15	9.32	16.93	17.52	9.46	14.36	22.49	17.06	10.78	13.6	14.1	7.6	9.48	18.46	17	11.19	10.01	18	21.76	11.09	12.61	7.59	13.5	8.22		YBR168W	2.07	0.68	0.74	2.94	1.6	0.66	0.91	0	0	1.59	2.25	1.53	0	2.91	0	3.13	4.9	0	0.52	1.29	0	0.88	1.66
YBR169C	38.07	9.3	13.85	40.54	26.6	22.46	105.01	54.82	31.56	87.77	54.39	38.81	31.72	75.73	51.32	47.66	51.52	37.76	60.84	37.82	26.49	43.67	57.82	29.27		YBR169C	8.94	4.37	6.89	23.51	5.66	5.86	13.33	3.59	0	11	11.99	11.24	11.14	15.5	1.39	41.64	8.13	9.51	1.74	14	16.09	3.32	14.19
YBR170C	22.81	3.78	7.63	14.73	12.04	11.03	15.19	15.78	11.06	11.77	12.88	9.31	6.4	13.35	10.22	12.05	7.33	9.25	19.59	11.23	4.26	13.41	15.2	5.02		YBR170C	3.63	7.46	6.57	6.18	14.89	12.35	6.58	0	0	4.29	13.86	12.5	0.76	14.48	0	6.76	3.31	5.8	4.23	6.97	0	7.51	6.41
YBR171W	138.07	115.21	81.71	123.15	179.83	126.68	108.28	158.33	151.09	122.09	155.57	138.54	116.08	156.76	104.69	103.74	125.78	99.59	139.45	133.9	79.23	158.79	160.88	115.13		YBR171W	32.74	29.52	31.86	38.74	41.86	22.32	26.34	16.02	26.47	21.6	45.86	26.18	2.78	33.23	0	15.45	36.3	0	9.03	26.77	17.95	27.82	35.77
YBR172C	59.45	30.75	41.55	33.9	57.18	32.65	51.15	40.45	53.18	41.32	37.95	35.74	33.97	36.43	30.89	39.47	41.92	35.62	48.95	38.43	37.37	46.65	72.34	35.1		YBR172C	5.55	5.57	5.1	9.42	13.34	8.29	7.53	0	0	5.32	12.02	8.29	2.61	8.99	0.86	5.32	5.05	0	2.15	8.37	3.74	4.14	11.49
YBR173C	252.3	141.15	234	259.49	235.63	235.69	204.63	215.31	211.77	143.51	206.5	191.79	145.55	206.62	156.94	130.93	163.15	163.43	172.58	142	114.93	142.47	185.45	143.22		YBR173C	24.37	57.81	37.81	43.94	55.1	31.5	33.3	54.52	0	30.07	70.94	46.16	7.11	58.08	0	34.18	0	0	15.37	73.76	0	31.97	40.91
YBR174C	12.37	0	0	20.11	16.83	9.6	11.05	16.23	13.54	8.02	12.44	12.6	21.93	11.06	18.71	4.42	4.89	5.16	15.14	8	9.53	5.68	3.21	7.96		YBR174C	0	0	1.93	0	3.34	0	0	0	0	0	0	1.18	10.13	3.73	0	2.82	0	0	4.7	2.38	0	0	5
YBR175W	53.21	25.97	22.46	37.27	32.35	50.28	35.54	49.4	32.53	29.66	30.81	24.84	47.09	32.31	38.83	37.31	21.9	33.13	45.68	41.22	31.46	32.47	27.49	30.38		YBR175W	5.19	5.65	2.14	6.82	9.27	5.52	8.91	0	0	3.32	6.26	6.22	0	6.51	0	2.83	0	0	0	7.17	0	3.26	6.16
YBR176W	34.92	7.88	5.68	20.03	16.41	19.25	16.12	19.98	16.36	13.45	12.88	13.06	16.26	10.62	10.76	17.26	14.11	13.47	24.43	13.5	10.37	12.35	11.42	7.17		YBR176W	6.42	4.76	4.54	11.05	9.91	9.62	4.29	0	0	4.48	9.11	5.4	0.79	4.61	0	6.61	0	0	0.74	6.54	20.48	5.36	6.02
YBR177C	47.07	10.09	11.63	36.85	30.5	24.24	46.48	35.97	25.03	23.23	34.61	30.19	16.34	31.4	24.03	29.32	23.31	21.39	33.16	20.67	17.06	15.27	43.27	13.76		YBR177C	20.15	27.22	31.45	23.25	34.86	30.98	35.69	5.84	0	27.93	42.83	32.68	7.11	35.71	6.8	41.28	13.24	30.94	8.47	27.67	6.55	21.48	34.44
YBR178W	7.2	0	4.78	2.31	8.62	5.01	5.74	10.89	3.68	2.83	10.83	4.22	9.77	6.16	8.54	10.36	4.94	6.61	13.63	11.95	6.23	3.46	10.67	4.64		YBR178W	2.45	0	1.01	0	0	0	3.61	0	0	4.71	0	3.03	0	0	0	0.93	0	0	0	1.53	0	1.73	1.41
YBR179C	15.18	5.75	4.62	10.63	10.25	7.69	14	14.22	9.58	13.97	11.04	7.74	11.06	12.25	12.31	18.48	11.39	14.51	23.36	14.09	9.95	15.17	20.34	7.76		YBR179C	2.73	1.69	1.99	4.31	3.24	1.55	3.89	0	0	2.45	3.71	2.19	0.74	2.4	0	3.37	0	0	0	4.88	0	1.93	5.64
YBR180W	6	2.56	3.32	1.34	1.5	0.97	2.53	1.8	3.98	2.46	2.15	0.98	2.83	0.71	1.09	4.32	1.72	1.75	6.55	3.46	4.33	2	3.91	1.34		YBR180W	0	0	0	0.45	0.66	0.6	0.21	0	0	0	0	0	0	0	0	0	0	0	0	0	0	0	0.16
YBR181C	1192.33	655.83	839.31	1321.43	826.18	878.04	1184.83	680.42	754.02	867.77	950.75	831.99	897.61	917.23	714.73	690.29	785.16	959.6	604.23	771.55	575.96	843.36	750.37	788.32		YBR181C	545.63	199.51	172.09	536.43	358.82	234.24	496.86	513.53	305.46	504.72	665.54	429.14	171.48	527.19	61.47	383.34	456.59	909.02	114.86	501.97	203.47	161.26	511.84
YBR182C-A	50.49	0	0	0	0	0	10.07	13.64	0	0	13.57	0	0	13.51	29.95	36.35	21.68	8.28	36.77	13.09	0	30.35	15.59	0		YBR182C-A	0	0	0	0	0	0	0	0	0	0	0	0	0	0	0	0	0	0	0	0	0	0	0
YBR182C	5.68	1.68	5.08	1.58	1.64	2.15	5.23	2.6	2.61	4.72	3.05	1.49	2.22	3.97	2.98	4.87	1.88	3.87	8.27	3.85	5.67	4.73	5.66	2.46		YBR182C	0.74	0.2	0.41	0.29	0.29	0.59	0	0	0	1.43	1.01	0.46	0	0	0	0.7	0	0	0	0.93	6.53	0	0
YBR183W	103.08	56.9	60.4	104.2	65.6	89.64	119.11	98.68	65.82	93.33	98.53	88.28	54.29	160.43	103.31	96.3	104.14	126.57	89.05	70.25	67.79	76.96	64.07	51.03		YBR183W	9.76	5.94	9.33	14.04	6.65	5.5	8.87	8.99	0	4.41	12.87	7.97	3.91	18.15	0	22.55	13.58	0	4.35	8.59	0	5.07	10.2
YBR184W	6.09	1.42	3.68	3.4	3.32	3	15.32	13.76	8.03	52.03	9.72	6.86	42.23	17.97	37.98	31.09	21.86	35.08	33.05	32.35	18.36	31.06	15.95	10.7		YBR184W	1.57	0	0	1.74	0.24	0	0.46	0	0	0.6	0	0.19	0.43	0	0	0	0	0	0	0.78	0	0	1.8
YBR185C	41.29	18.29	19.77	23.86	13.68	26.01	28.52	23.61	17.28	20.29	17.08	12.43	28.96	20.82	23.08	35.45	27.96	35.93	47.13	26.36	21.48	21.96	25.5	23.68		YBR185C	7.44	7	6.66	5.34	12.54	6.48	14.44	0	0	5.19	9.19	6.26	0.92	7.72	0	7.92	0	28.06	0.85	10.54	0	5.98	12.41
YBR186W	8.64	1.3	3.94	3.39	1.78	3.34	4.73	5.49	3.9	11.15	3.64	2.65	9.77	5.07	9.04	10.97	8.43	9.99	13.07	9.49	8.79	10.99	4.18	4.91		YBR186W	0.29	0.16	0	0	0.22	0	0	0	0	0	0.59	0.44	0	0	0	0.33	0	0	0.36	0.36	0	0	0
YBR187W	61.76	24.16	20.9	77.86	61.28	64.77	69.7	92.27	59.07	79.23	116.32	87.7	105.43	112.4	86.1	92.62	86.47	95.43	104.27	111.41	51.07	84.19	109.31	50.72		YBR187W	49.61	19.71	17.67	42.3	53.82	29.61	51.29	31.5	69.38	48.89	85.6	39.48	3.65	57.68	4.07	24.81	7.93	27.8	9.3	47.62	23.53	17.99	42.27
YBR188C	227.31	60.77	112.64	118.72	77.92	72.78	171.5	114.91	89.73	113.34	110.66	76.31	128.53	122.24	103.98	93.65	108.77	109.75	116.95	102.07	83.2	84.31	89.39	91.13		YBR188C	3.85	7.35	7.11	1.52	7.44	5.13	7.08	0	0	7.4	3.93	5.35	0	8.46	0	7.28	0	0	0	12.01	0	4.08	2.21
YBR189W	694.17	347.83	237.71	552.14	412.88	398.64	604.48	457.15	444.43	546.82	605.21	580.53	438.2	540.62	542.41	504.29	436.27	583.24	515.01	505.61	285.59	410.12	889.98	385.03		YBR189W	831.12	397.04	281.26	938.41	648.4	386.15	917.57	397.31	143.59	1036.92	1032.98	721.97	270.5	732.38	97.92	642.41	687.16	683.74	168.39	968.81	668.66	267.03	917.43
YBR190W	20.18	0	0	3.59	0	2.6	1.79	4.85	13.39	6.61	12.05	8.77	3.8	4.8	9.31	9.69	0	4.41	19.59	2.33	4.85	10.78	8.31	7.23		YBR190W	0	0	0	0	0	0	0	0	0	0	0	0	0	0	0	0	0	0	0	0	0	0	0
YBR191W-A	0	0	0	0	0	0	0	0	0	0	0	0	0	0	0	0	0	0	0	0	0	0	0	0		YBR191W-A	0	0	0	0	0	0	0	0	0	0	0	0	0	0	0	0	0	0	0	0	0	0	0
YBR191W	635.64	320.76	237	515.21	230.03	390.61	413.73	367.11	209.28	299.06	405.09	390.03	286.79	413.32	375.09	316.71	275.69	440.97	396.2	307.06	180.1	252.89	338.04	240.94		YBR191W	727.56	362.94	278.86	830.37	636.94	354.89	823.9	210.05	665.66	622.49	914.57	680.2	231.86	785.02	85.23	576.65	513.56	688.25	180.18	771.35	551.96	219.64	701.46
YBR192W	99.97	49.92	89.05	80.99	68.99	80.11	94.28	72.92	81.14	73.74	60.31	47.43	58.83	68.43	70.56	67.89	70.26	81.9	77.15	70.83	39.86	66.46	73.62	65.5		YBR192W	4.62	2.51	3.78	7.28	8.2	4.91	5.77	0	0	6.2	7.84	7.55	4.4	4.86	0	3.84	0	0	0	6.9	0	3.59	7.15
YBR193C	53.56	8.22	19.56	42.92	28.08	30.74	63.26	50.37	40.67	46.31	40.31	36.14	45.42	56.17	47.66	50.52	55.19	47.76	55.38	58.34	25.49	52.8	62.84	42.29		YBR193C	6.39	5.96	3.62	13.68	7.05	4.37	13.43	14.29	23.62	0	10.54	4.78	2.48	9.62	1.85	7.24	0	18.92	0	10.81	0	4.51	9.42
YBR194W	82	44.97	72.9	71.58	76.77	64.52	99.34	72.81	72.46	67.62	72.43	45.82	54.64	70.52	79.05	56.94	40.24	65.29	89.57	62.28	44.36	52.82	65.11	51.92		YBR194W	9.98	2.72	5.11	3.94	15.41	3.98	0	0	0	9.58	5.08	6.93	3.4	4.38	0	4.71	0	0	0	4.66	0	4.41	0
YBR195C	27.94	7.27	7.07	15.94	12.77	18.12	14.36	16.89	15.35	19.77	11.71	10.19	13.25	10.64	12.08	14.66	10.17	12.88	24.65	14.49	11.27	13.09	22.22	5.34		YBR195C	5.65	8.79	4.57	4.77	9.03	7.3	5.05	0	10.44	3.87	7.95	3.86	1.65	4.25	0	4.27	9.54	16.73	1.53	8.55	0	4.28	5.78
YBR196C-A	156.36	400.13	173.04	0	0	30.22	41.6	0	0	0	56.05	0	0	55.78	61.84	0	0	170.88	0	0	0	0	0	0		YBR196C-A	0	0	0	0	0	0	0	0	0	0	0	0	0	0	0	0	0	0	0	0	0	0	0
YBR196C-B	0	0	0	0	0	0	0	0	0	0	0	0	0	0	0	0	0	0	0	0	0	0	0	0		YBR196C-B	0	0	0	0	0	0	0	0	0	0	0	0	0	0	0	0	0	0	0	0	0	0	0
YBR196C	189.04	79.6	61.96	111.61	57.72	85.25	101.92	85.55	54.4	112.9	96.25	80.6	62.14	105.78	87.23	99.17	78.05	115.8	128.86	84.44	61.32	75.63	115.67	46.23		YBR196C	431.42	177.17	127.61	450.67	233.71	160.8	423.12	115.3	152.4	322.71	402.64	339.54	194.72	364.83	36.38	257.98	170.66	329.69	51.64	433.6	444.47	114.73	445.82
YBR197C	29.51	4.27	9.24	17.4	15.01	11.3	26.22	19.26	17.58	24.62	20.36	17.42	19.83	17.28	20.15	22.85	20.08	13.51	32.44	20.79	16.87	12.05	41.26	5.38		YBR197C	4.74	4.65	4.28	8.23	6.59	4.54	2.09	0	0	1.82	8.38	0.88	1.29	5.83	0	2.51	0	39.34	1.2	7.09	0	1.68	7.07
YBR198C	30.54	7.96	13.78	20.23	25.03	19.71	21.62	20.18	21.04	23.21	24.66	15.55	15.44	17.52	17.16	21.91	17.42	21.69	33.07	21.88	11.97	16.91	32.6	10.59		YBR198C	6.09	7.16	5.98	5.89	13.04	8.57	8.09	0	0	3.02	11.87	7.45	1.87	8.8	1.59	4.67	4.65	4.07	1.73	10.04	0	6.04	9.8
YBR199W	111.2	17.89	53.44	85.21	70.43	67.29	101.26	77.39	61.98	79.91	73.34	61.52	36.65	91.12	65.21	52.31	61.84	65.28	97.33	67.68	44.91	63.16	92.87	52.91		YBR199W	16.6	11.6	12.13	25.63	26.47	14.22	18.85	5.65	18.68	12.47	32.61	17.14	9.82	20.92	2.19	26.58	8.54	0	2.28	22.49	0	13.64	21.11
YBR200W-A	117.69	0	195.37	117.89	176.28	187.63	117.42	127.21	100.41	260.17	94.92	57.54	49.91	157.44	104.72	63.56	50.53	96.46	342.82	91.57	190.99	141.51	109.01	189.67		YBR200W-A	0	0	0	0	0	0	0	0	0	0	0	0	0	0	0	0	0	0	0	0	0	0	0
YBR200W	29.56	12.01	9.24	25.5	19.53	21.67	19.84	20.11	20.47	16.23	15.7	13.09	10.32	14.7	13.31	17.9	10.75	13.22	27.48	17.14	7.9	15.89	26.41	12.33		YBR200W	4.44	6.78	8.1	4.21	16.47	5.2	5.89	9.28	7.67	2.84	12.48	8.22	0.81	7.28	1.8	3.13	0	6.14	1.87	6.28	0	6.07	6.79
YBR201C-A	1276.99	790.62	1059.94	767.51	802.13	1074.67	575.37	990.73	764.41	991.58	786.26	634.45	611.41	848.66	794.18	489.43	495.24	729.29	802.46	833.35	846.77	718.18	648.67	912.84		YBR201C-A	0	114.66	57.54	55.38	67.75	65.38	12.91	0	0	33.68	35.76	27.06	0	15.41	71.09	33.14	207.57	0	0	76.55	0	68.19	80.48
YBR201W	133.33	80.11	98.16	130.07	124.17	122.33	115.21	132.21	105.35	140.11	109.71	102.6	96.36	133.39	138.58	104.36	156.31	136.46	127.07	142.53	119.16	121.28	111.69	128.93		YBR201W	6.92	3.23	6.21	6.23	6.1	3.15	6.54	0	25.56	5.69	10.07	5.18	0	10.41	0	6.71	0	0	0	8.62	0	3.84	12.46
YBR202W	15.05	0.83	3.24	12.24	12.33	6.59	10.89	15.57	11	11.92	14.6	13.03	8.27	8.11	8.16	10.79	10.23	12.64	22.95	10.79	9.84	11.98	32.83	8.55		YBR202W	7.75	5.63	4.62	10.88	9.34	5.99	8.01	2.89	14.33	4.6	20.18	12.07	2.01	10.86	1.5	6.24	6.55	3.83	1.16	10.81	0	4.04	16.57
YBR203W	26.55	13.59	17.63	13.4	13.26	14.25	19.54	13.71	15.52	15.65	8.35	7.12	12.01	10.95	14.64	10.98	13.68	11.99	22.34	11.94	10.64	14.43	20.65	11.57		YBR203W	1.51	1	0.85	1.85	2.2	0.98	0.99	0	0	0.64	1.25	0.62	0	1.32	0	1.96	0	3.47	0.21	1.15	2.94	1.48	2.59
YBR204C	15.82	4.19	7.24	8.52	3.68	6.32	12.41	9.14	3.02	9.91	10.85	6.13	5.09	12.55	9.06	7.66	3.28	6.44	15.69	6.79	7.67	3.93	10.78	3.08		YBR204C	4.18	2.53	3.3	5.5	6.82	2.97	4.1	0	0	2.68	6.63	4.01	0.63	4.49	0	9.3	5.5	0	0.59	4.63	0	2.3	5.59
YBR205W	13.22	3.83	5.7	12.69	13.1	7.59	11.08	12.49	11.59	8.69	18.36	17.35	4.84	12.32	12.2	12.09	8.23	7.56	21.21	10.6	7.55	8.39	21.47	5.22		YBR205W	21.31	14.22	12.66	21.58	22.64	17.58	22.76	13.31	0	13.07	31.16	24.75	7.6	25.12	1.72	15.64	5.03	0	3.75	23.75	7.46	10.51	24.72
YBR206W	28.35	0	7.48	26.74	8.88	21.69	21.58	29.88	13.04	18.99	27.29	31.37	12.22	25.65	21.04	33.04	23.57	26.26	35.7	21.08	8.77	19.49	30.74	13.06		YBR206W	47.81	38.63	29.65	34.41	50.61	40.94	69.07	0	0	32.99	98.58	33.16	4	74.84	0	29.37	81.69	71.6	4.36	63.05	0	21.92	44.55
YBR207W	44.58	14.6	22.45	27.94	22.79	23.89	25.8	29.92	26.5	23.04	25.67	19.21	17.92	20.12	21.31	21	17.42	21.06	36.31	21.26	12.8	20.32	27.92	14.64		YBR207W	7.56	5.1	7.62	9.37	15.01	7.66	8.74	0	0	6.22	10.52	4.54	0.98	7.27	0.73	5.44	0	7.46	1.36	9.65	0	6.36	9.7
YBR208C	10.07	4.76	3.33	3.59	4	3.32	4.23	5.62	5.29	6.33	4.41	2.71	4.05	4.34	4.95	8.21	5.16	5.91	16.02	5.59	7.02	9.29	16.74	2.08		YBR208C	4.96	1.77	4.58	4.55	1.88	4.46	4.85	1.27	0	1.87	1.99	2.21	0.55	1.64	0.16	0.8	2.89	5.06	0.51	3.65	5.71	1.9	7.88
YBR209W	2.13	0	0	0	3.19	1.23	1.7	2.3	1.82	0	2.29	0	10.83	0	0	4.6	3.66	0	12.4	4.42	0	0	0	6.86		YBR209W	0	0	0	0	0	0	0	0	0	0	0	0	0	0	0	0	0	0	0	0	0	0	0
YBR210W	185.04	228.3	113.36	274.5	169.93	288.62	186.36	282.16	140.02	200.2	234.51	203.56	222.33	247.54	236.52	168.14	138.09	179.11	226.99	205.68	131.08	177.46	119.71	131.35		YBR210W	26.28	15.33	10.26	16.29	18.84	15.98	13.81	0	0	7.2	28.05	10.42	0	24.72	3.8	12.76	0	0	0	30.41	0	8.62	18.29
YBR211C	103.16	112.78	121.39	96.79	114.91	120.37	103.7	139.38	95.81	112.26	83.55	71.83	132.9	103.07	113.48	105.31	122.22	105.1	119.34	130.73	87.59	120.11	78.22	95.23		YBR211C	2.78	4.24	4.1	2.63	8.16	1.48	5.32	8.71	0	3.2	7.18	3.43	0.76	5.37	0	4.83	0	0	0.7	4.85	0	2.75	5.42
YBR212W	19.35	3.21	6.01	9.37	11.88	6.21	15.66	13.54	9.86	13.13	9.88	9.66	7.32	11.17	8.92	8.82	5.98	5.38	21.18	12.27	9.04	5.36	23.89	5.83		YBR212W	5.96	2.17	3.22	9.39	8.26	9.42	9.13	7.43	0	3.65	8.66	4.69	2.26	7.39	0	10.01	2.81	0	0.65	7.69	0	5.03	8.08
YBR213W	13.76	3.11	6.72	5.51	6.67	4.22	6.46	7.44	7.94	7.16	8.7	5.54	9.61	4.76	6.48	10.78	5.56	3.98	16.21	8.4	15.76	8.76	7.5	5.22		YBR213W	1.38	3	3.01	1.09	3.73	3.67	3.04	0	0	2.65	3.28	1.7	0	2.42	0	0.26	0	0	1.74	3.01	0	2.19	3.95
YBR214W	22.86	12.64	10.93	27.12	14.79	11.35	36.2	27.09	14.04	35.58	30.49	23.97	10.86	33.86	29.62	19.23	17.28	16.31	45.82	20.11	12.66	12.76	43.37	12.38		YBR214W	16.52	6.96	8.56	20.65	7.46	3.65	11.47	0	0	12.56	29.22	14.51	5.94	31.75	0.63	34.49	14.75	0	8.26	9.52	5.47	8.92	19.3
YBR215W	32.59	8.11	12.52	22.01	22.37	15.74	30.83	24.95	25.87	33.5	21.09	14.75	22.78	21.64	19.6	21.62	23.06	20.08	35.93	28.02	18.61	28.3	39.69	16.53		YBR215W	2.31	1.96	1.33	2.03	3.18	2.6	2.84	0	0	1.97	4.54	2.54	0	2.93	0	1.84	0	0	0.97	1.92	0	1.45	2.51
YBR216C	18.59	3.2	6.91	13.12	9.14	9.41	17.49	13.5	9.23	19.08	12.53	9.23	18.59	16.18	15.23	22.28	20.25	16.56	32.23	17.42	11.41	16.35	22.62	9.17		YBR216C	3.07	1.54	2.16	4.29	3.1	2.14	3.83	0	0	2.72	5.62	2.48	0.64	4.36	0	4.37	0	0	0.3	4.12	4.15	1.67	6.91
YBR217W	88.87	85.96	62.73	116.08	99.58	111.57	100.54	126.32	104.48	98.32	89.55	77.33	99.71	110.09	131.18	80.62	98.55	90.85	106	121.97	87.82	117.8	76.06	86.84		YBR217W	2.39	0	0.98	0.94	9.21	1.9	0.88	0	0	0	2.43	1.47	0	0	0	0	0	0	0	1.49	0	0.42	2.05
YBR218C	20.23	6.6	7.75	13.61	9.46	8.46	14.43	12.45	10.09	11.91	10.01	7.34	7.08	12.16	9.47	15.47	15.34	12.85	28.85	14.3	10.94	11.51	28.3	9.08		YBR218C	34.69	11.53	8.57	50.22	25.76	16.3	42.81	9.1	0	20.05	35.87	27.82	7.65	33.56	2.09	22.34	22.05	21.41	3.92	44.66	28.84	11.39	47.81
YBR219C	17.86	10.49	4.19	8.64	13.33	5.95	7.74	11.44	6.49	9.64	6.83	6.42	6.27	8.39	2.77	11.45	8.88	16.45	16.68	9.57	2.94	9.39	5.36	4.4		YBR219C	10.62	4.26	1.56	8.6	11.44	3.72	6.61	0	0	13.01	16.33	12.58	2.32	18.25	0	4.56	0	0	0	5.81	0	8.03	11.79
YBR220C	8.02	2.62	1.18	5.08	4.22	3.41	3.4	4.11	3.41	3.66	4.66	4.71	3.27	3.34	4.31	3.98	0.65	2.2	8.98	3.59	1.85	1.7	5.45	1.1		YBR220C	5.66	3.11	2.39	6.27	9.13	5.88	6.88	0	0	2.29	8.24	5.79	1.29	5.9	0.59	3.94	10.32	0	1.1	7.61	5.11	4.55	6.87
YBR221C	37.63	2.16	10.26	30.38	19.35	14.17	36.31	27.63	19.65	35.04	20.54	22.8	13.34	29.46	25.99	22.25	18.81	24.68	44.79	24.77	12.76	10.81	65.56	11.77		YBR221C	104.82	24.49	30.21	120.06	62.81	47.12	131.69	14.99	86.69	77.16	116.71	80.29	26.7	101.7	1.94	88.92	28.3	79.38	10.87	116.91	50.4	30.09	103.16
YBR221W-A	0	0	0	0	0	0	0	0	0	0	0	0	0	0	0	0	0	0	0	0	0	0	0	0		YBR221W-A	0	0	0	0	0	0	0	0	0	0	0	0	0	0	0	0	0	0	0	0	0	0	0
YBR222C	36.24	16.29	11.74	23.23	43.16	30.34	26.81	28.28	37.1	22.58	26.99	19.36	12.59	20.62	19.51	17.57	11.54	13.56	31.8	14.86	10.71	10.2	35.81	6.55		YBR222C	18.98	7.55	8.23	21.63	37.45	15.39	21.28	18.87	15.59	20.81	22.3	16.82	8.61	20.9	1.83	29.58	7.13	0	5.32	21.02	15.86	14.37	20.55
YBR223C	3.98	1.35	2.34	3.08	4.43	2.22	2.84	5	4.3	4.28	4.64	2.56	3.24	2.08	3.04	3.34	6.53	2.61	9.6	4.96	4.91	5.8	7.85	2.79		YBR223C	1.2	0.33	0.47	2.13	1.79	0.8	0.88	0	0	1.15	2.04	0.37	0.41	1.58	0	0.9	0	6.23	0	1.13	0	0.42	1.4
YBR223W-A	0	0	0	0	0	0	0	0	0	0	0	0	0	0	0	0	0	0	0	0	0	0	0	0		YBR223W-A	0	0	0	0	0	0	0	0	0	0	0	0	0	0	0	0	0	0	0	0	0	0	0
YBR224W	8.35	12.27	10.61	3.99	5.08	2.43	8.45	4.99	10.66	2.6	5.64	3.26	2.94	3.42	3.4	5.81	7.46	5.71	14.7	3.35	12.55	10.25	14.77	4.11		YBR224W	0	0.74	1.2	1.07	2.38	0.72	1	0	0	0	0	0	0	0	0	1.05	0	0	0	0.85	0	1.44	0.8
YBR225W	12.66	6.99	15.11	10.07	12.9	7.64	10.7	9.77	13.53	11.64	9.57	8.41	5.67	11.49	8.05	11.44	11.34	8.49	17.65	12.07	9.46	9.03	16.51	4.44		YBR225W	1.21	2.39	2.13	2.72	4.57	3.42	1.52	2.7	0	0.33	4.35	3.3	0.47	2.18	0	2.94	4.08	0	0.44	2.71	3.03	2.4	2.2
YBR226C	29.73	9.17	7.93	18.9	24.8	28.21	18.58	24.11	12.54	15.16	17.99	15.16	24.21	20.33	19.7	29.23	20	17.2	37.81	11.16	9.74	22.68	24.84	5.39		YBR226C	4.07	2.77	2.09	3.21	2.62	5.16	0	0	0	0	4	1.88	2.77	1.12	0	2.94	0	0	0	1.04	0	0.46	2.07
YBR227C	61.84	14.26	24.66	39.29	25.32	33.27	35.28	29.51	23.93	24.63	24.36	19.98	22.05	25.84	20.6	28.75	25.84	31.18	32.59	27.75	15.27	25.01	36.47	14.37		YBR227C	4.11	5.34	5.97	4.49	7.82	3.71	6.05	0	40.95	2.43	8.6	4.39	0	4.45	0	3.7	0	0	0.8	5.52	0	4.47	3.99
YBR228W	58.73	24.45	37.59	46.5	40.81	47.59	51.39	61.19	42.56	51.45	45.27	27.68	47.41	54.53	46.17	59.62	58.94	55.21	60.81	52.49	45.17	48.5	58.99	30.79		YBR228W	0.6	2.63	2.39	1.43	3.72	3.21	2.66	0	0	1.16	2.46	2.79	0.82	2.65	0	1.82	0	0	0	1.88	0	2.34	1.73
YBR229C	13.11	5.11	11.99	11.8	10.82	8.21	14.56	13.56	9.73	11.48	12.98	11.24	7.41	13.02	9.98	14.37	11.26	11.78	28.02	18.34	12.54	10.74	18.07	8.42		YBR229C	7.29	1.68	2.41	10.86	3.75	4.65	12.51	0	0	5.59	9.79	5.24	2.42	7.11	0.98	9.29	3.83	6.71	0.82	10.39	8.53	2.86	10.49
YBR230C	490.66	358.75	432.78	357.73	414.45	349.33	602.64	345.6	333.64	314.14	235.38	210.45	156.45	354.03	258.24	194.81	249.22	229.81	298.21	196.47	159.65	221.79	279.46	265.57		YBR230C	75.45	115.24	52.68	117.34	187.68	90.34	89.43	32.82	0	76.42	116.72	71.09	31.36	110.4	4.24	227.91	24.79	0	37.02	103.16	0	79.94	94.9
YBR230W-A	131.98	253.31	182.58	396.63	115.32	184.91	667.16	546.88	337.82	540.31	331.16	258.13	205.22	223.65	561.11	221.76	302.23	346.17	760.91	387.96	356.98	158.69	217.34	425.41		YBR230W-A	74.98	30.61	64.01	118.29	0	49.88	137.9	0	0	35.97	89.12	86.7	25.5	49.37	0	84.93	0	388.6	0	140.15	0	19.86	161.17
YBR231C	46.19	24.55	31.85	35.88	71.85	32.34	45.37	46.85	47.29	27.93	47.76	27.1	20.49	38.79	19.6	27.12	18.92	17.71	40.88	32.07	25.37	30.76	51.78	20.04		YBR231C	3.03	8.9	5.87	6.21	12.15	5.8	4.45	0	0	3.49	9.46	5.79	2.47	5.32	0	5.03	7.16	0	0.76	2.26	0	4.7	4.16
YBR232C	4.13	0	14.41	3.88	14.13	2.62	6.21	0	20.39	4.1	20.16	4.75	11.11	0	5.46	10.92	4.04	2.34	19.29	21.17	26.71	8.11	15.7	0		YBR232C	0.52	0	0	0	0	2.4	0	0	0	0	4.4	0	0	0	0	1.8	0	0	0	0.44	0	0	0.03
YBR233W-A	252.37	405.52	477.41	305.72	483.52	517.19	365.38	567.8	500.74	689.09	416.54	476.37	970.68	518.21	739.85	667.75	786.24	635	711.64	846.36	749.28	790.37	405.93	591.18		YBR233W-A	0	5.45	14.35	39.45	19.3	0	14.72	0	0	9.6	6.79	10.8	0	8.78	0	9.44	0	0	0	24.93	0	3.53	28.67
YBR233W	9.81	1.86	10.68	9.33	10.92	6.5	13.39	15.49	13.64	16.31	18.04	10.9	6.11	10.92	11.26	7.76	6.47	7.28	23.38	15.63	17.42	5.17	20.07	4.7		YBR233W	3.23	3.15	2.43	2.94	4.15	1.61	4.57	6.48	0	2.38	9.72	4.08	0	5.45	0	3.16	4.9	0	0.52	8.7	0	1.61	4.5
YBR234C	35.51	14.24	19.35	26.95	16.67	21.51	38.28	31.51	20.35	33.85	32.48	25.91	20.68	33.18	33.17	34.92	27.76	31.1	53.07	30.51	22.36	23.58	62.18	18.79		YBR234C	29.35	13.77	15.42	42.03	21.26	11.3	35.22	14.14	0	21.67	44.78	18.38	7.99	35.29	0.91	34.45	10.68	9.36	7.98	39.11	23.78	11.16	38.05
YBR235W	12.01	4.3	10.63	5.71	6.84	5.34	4.79	5.02	6.76	5.19	6.54	4.38	3.8	5.48	4.04	7.09	3.3	5.09	12.13	7.81	7.1	7.12	4.55	1.68		YBR235W	2.18	2.01	1.4	2.69	6.53	3.49	3.61	0	3.53	0.79	5.28	3.87	1.3	5.03	0.28	1.91	1.61	0	1.03	2.64	0	2.36	2.89
YBR236C	65.15	36.73	52.19	38.52	42.99	34.87	50.73	34.97	36.93	52.82	36.5	23.39	43.67	36.33	44.33	43.63	46.56	51.98	56.24	51.99	31.55	45.47	41.92	32.31		YBR236C	2.72	4.65	3.45	5.82	6.59	3.93	7.14	0	10.05	5.22	8.7	3.83	0.53	6.14	0	3.81	4.59	16.1	0.98	3.14	0	2.88	6.45
YBR237W	21.44	11.58	25.76	13.9	21.47	16.74	19.01	17.47	22.06	17.26	15.18	11.49	14.99	17.64	15.4	17.46	18.51	19.01	25.97	22.25	17.95	21.51	25.42	15.28		YBR237W	0.92	2.5	2.18	1.01	2.98	1.17	1.49	0	0	1.41	2.12	1.59	0.25	1.29	0	1.25	0	0	0	0.8	0	1.3	1.05
YBR238C	16.11	15.58	12.63	13.32	18.62	18.24	13.87	22.49	23.7	13.83	15.28	14.39	10.97	14.25	13.7	17.17	10.24	15.47	17.92	20.4	14	13.42	25.07	12.47		YBR238C	6.7	24.36	17.69	7.33	42.22	27.04	8.11	20.31	0	2.07	23.05	18.4	1.47	13.48	4.38	2.86	5.11	0	6.55	10.1	11.38	18.63	10.53
YBR239C	16.21	9.79	12.7	11.97	16.91	10.66	13.37	12.6	15.85	14.49	15.08	11.04	6.49	13.25	10.91	11.02	10.32	7.16	18.57	15.68	16.16	14.89	21.59	9.39		YBR239C	1.24	1.35	1.23	1.47	3.83	1.82	1.83	0	0	0	2.74	0.96	0.42	3	0	1.52	0	0	0.78	2.71	5.45	2.19	2.49
YBR240C	5.27	15.17	1.46	1.94	7.56	2.16	2.98	2.85	7.49	4.96	3.78	1.5	1.49	2.35	1.69	4.58	3.77	2.59	8.95	6.38	5.7	4.75	3.52	2.12		YBR240C	0.75	0.81	1.23	0	5.78	2.59	0.55	11.72	0	0.72	0.51	0.12	0.51	0.33	0	0.14	0	0	0	0.47	0	1.32	0.43
YBR241C	7.19	1.53	5.31	4.32	3.29	2.32	11.16	6.91	5.11	9.81	7.3	3.52	2.71	6.63	7.94	4.32	4.12	3.27	11.64	5.39	3.46	4.8	5.43	0.97		YBR241C	13.96	2.41	3.86	14.23	3.94	5.98	16.78	0	0	13.72	11.56	5.35	8.8	15.25	1.31	25.71	8.05	0	0.43	10.61	5.98	2.04	8.59
YBR242W	237.18	176.46	167.24	255.52	216.1	207.54	197.11	194.53	196.94	245.53	178.27	163.56	244.72	164.87	174.35	161.28	194.86	143.66	134.98	185.19	133.33	184.64	132.27	126.89		YBR242W	0.83	10.44	11.39	8.55	27.67	9.76	11.65	0	0	6.4	19.81	11.57	0	14.64	1.69	3.15	9.86	17.28	8.41	13.5	0	12.07	16.72
YBR243C	21.63	11.86	8.79	11.67	21.15	9.98	19.02	19.32	16	25.37	24.44	17.69	21.34	22.44	25.13	26.54	21.22	21.99	42.26	25.41	19.58	23.88	32.7	12.09		YBR243C	13.91	2.05	2.62	18.1	6.1	2.4	12.45	0	0	10.1	9.71	6.38	1.02	8.92	0	6.53	4.45	0	1.9	12.89	19.8	3.19	10.56
YBR244W	151.12	40.24	23.2	105.7	96.82	110.4	89.24	103.86	73.78	60.08	57.3	51.25	111.13	87.88	91.2	133.98	75.01	118.57	82.7	79.75	37.8	54.62	42.08	40.83		YBR244W	2.98	3.24	0.81	4.7	4.6	6.34	12.05	46.63	0	5.71	4.04	5.51	0	5.23	0	10.12	0	30.86	0	3.71	0	3.68	1.71
YBR245C	36.6	34.68	21.61	31.43	42.81	25.59	40.87	40.25	41.17	38.22	44.39	30.82	35.01	45.2	30.08	35.79	38.99	33.26	40.18	33.19	30.06	52.31	55.59	30.32		YBR245C	6.63	6.11	4.18	7.15	10.55	6.98	5.97	2.12	3.5	5.19	12.77	9.85	0.55	13.07	0.82	5.42	1.6	0	2.22	7.67	2.37	5.07	8.53
YBR246W	22.05	10.08	6.97	16.83	18.09	13.7	12.36	21.28	14.33	12.9	21.45	20.02	7.12	17.98	13.08	14.37	8.12	12.05	28.1	15.52	3.98	14.52	25.94	7.62		YBR246W	2.68	6.09	4.28	7.76	17.61	6.19	5.6	0	11.58	4.29	17.32	9.52	2.43	8.64	0.91	4.9	5.29	9.27	3.39	10.59	0	5.21	9.23
YBR247C	87.95	58.98	58.4	60.11	96.3	78.88	45.83	58.57	97.8	55.62	51.52	48.44	62.47	34.4	45.33	50.66	47.57	38.44	37.69	74.04	46.37	67.58	92.91	55.72		YBR247C	7.24	37.33	25.79	7.34	49.21	25.3	14.96	16.19	0	7.27	28.32	20.93	3.75	12.1	2.09	3.51	4.07	7.14	7.39	17.39	0	20.32	11.46
YBR248C	23.08	7.99	9.22	12.65	18.45	10.16	17.03	15.75	15.1	21.14	14.93	10.69	17.07	10.21	11.12	19.62	13.71	12.17	34.12	20.34	13.52	25.45	53.36	15.94		YBR248C	14.78	6.28	6.34	19.13	11.41	4.41	15.01	0	0	11.92	11.25	8.57	2.41	10.13	0	6.03	6.99	12.26	1.87	14.37	0	4.91	20.17
YBR249C	70.95	31.92	25.77	50.64	34.46	40.49	39.38	44.64	40.44	34.31	56.63	42.01	29.62	47.16	32.55	36.92	32.37	39.07	50.06	39.39	15.59	27.33	72.57	16.53		YBR249C	102.97	63.26	47.68	122.21	108.3	64.85	113.28	51.78	0	77.05	205.64	123.51	25.06	157.59	9.57	86.32	106.14	78.34	19.07	128.32	66.32	48.71	116.97
YBR250W	8.49	1.42	7.96	3.4	3.04	3.96	2.65	3.79	5.04	5.98	2.58	2.35	6.57	2.96	3.28	6.51	3.17	4.23	11.29	6.13	6.39	5.32	7.75	3.87		YBR250W	0	0.17	0.13	0.74	0.49	0	0.23	0	0	0.6	0	0	0	0	0	0	0	0	0	0.2	0	0	0.18
YBR251W	56.6	13.41	27.84	29.96	20.94	33.02	47.97	29.84	27.43	41.54	31.19	19.13	35.56	32.91	33.79	47.3	39.01	39.18	62.34	50.75	36.29	41.17	52.65	23.65		YBR251W	10.72	8.1	10.17	9.39	10.11	2.85	9.64	9.33	0	4.57	6.47	8.63	4.05	10.46	0	8.77	0	12.35	1.5	11.13	20.9	5.26	13.31
YBR252W	100.3	95.26	75.52	125.95	91.38	121.09	104.81	139.71	100.57	114.8	170.11	98.08	122.77	153.82	163.77	132.53	99.45	126.11	156.62	149.1	71.59	126.81	107.27	79.99		YBR252W	75.77	56.6	32.26	62.55	70.74	32.82	58.34	82.79	0	54.11	101.73	53.25	4.79	49.51	0	37.26	41.68	36.53	13.34	64.78	154.63	26.76	68.69
YBR253W	374.67	593.92	498.59	476.52	593.03	626.15	485.49	673.9	506.03	481.39	619.85	498.42	432.28	642.88	557.91	472.96	528.86	522.19	571.11	598.01	580.96	499.75	490.85	491.38		YBR253W	12.93	5.63	11.65	32.63	17.96	15.13	13.31	0	0	39.69	22.83	10.36	7.03	15.89	0	19.52	0	0	0	17.72	0	5.48	16.3
YBR254C	98.56	94.58	89.47	103.66	76.12	110.26	123.53	143.99	70.95	153.57	99.36	85.84	189.39	140.09	163.52	128.63	130.92	126.73	150.28	157.37	103.3	137.02	86.54	98.03		YBR254C	6.56	4.29	8.78	11.39	7.09	6.29	9.65	20.55	0	15.11	12.48	9.31	1.79	6.91	0	6.44	0	0	0	13.08	0	7.88	17.3
YBR255C-A	228.61	59.29	82.05	175.75	155.01	132.53	161.5	158.62	133.02	142.66	111.29	116.31	89.09	143.82	89.77	127.91	114.07	111.41	193.48	121.79	63.5	96.58	120.15	102.05		YBR255C-A	21.06	7.17	7.55	29.07	14.23	5.6	13.56	0	0	25.26	16.09	7.31	0	0	0	7.95	31.13	54.58	0	16.4	0	7.44	16.6
YBR255W	30.09	19.59	19.18	19.27	22.53	13.71	30.87	18.87	18.68	24.41	18.49	12.61	12.3	21.85	15.62	21.86	31.6	22.9	32.18	19.93	17.73	25.52	32.85	17.75		YBR255W	1.58	1.12	0.91	0.54	0.53	1.1	1.85	0	0	0.44	2.64	1.27	0.31	1	0	1.04	0	0	1.44	1.85	4.02	0.57	1.05
YBR256C	211.75	168.95	206.21	237.1	224.15	225.68	335.29	315.59	256.19	350.28	249.79	212.81	303.62	319.79	369.02	299.68	403.16	354.66	325.87	321.66	373.54	373.98	349.11	363.34		YBR256C	11.67	4.99	5.58	16.44	5.79	7.98	14.72	0	0	8	9.62	10.54	3.4	6.59	0	15.11	0	0	3.15	15.58	0	5.3	23.89
YBR257W	183.77	200.24	185.01	176.4	243.89	225.68	198.09	229.82	214.78	233.36	161.06	143.38	301.67	159.45	203.02	195.5	207.69	181.91	158.87	246.82	166.75	267.05	170.83	182.16		YBR257W	2.69	6.97	5.98	5.84	6.24	0.36	3.96	0	0	7.76	5.49	4.57	0	4.73	0	3.05	0	13.96	1.7	5.88	0	5	4.25
YBR258C	110.14	109.92	127.99	156.23	135.28	132.81	192.52	195.25	146.59	185.05	145.68	128.17	231.67	201.57	199.28	187.17	194.84	194.27	219.77	219.39	140.61	241.02	134.67	189.93		YBR258C	0	1.02	4.1	5.92	2.9	4	0	0	0	0	2.55	4.63	0	0	0	2.13	0	0	0	5.85	0	2.65	5.38
YBR259W	23.73	6.25	6.75	14.02	14.42	15.1	19.48	19.35	14.58	16.12	15.46	15.52	17.71	17.27	20.27	22.07	18.63	21.96	27.65	23.78	12.91	20.55	18.42	10.27		YBR259W	0.92	0.38	0.54	2.73	1.61	1.84	0.85	0	0	0	2.35	1.07	0	1.22	0	0.87	2.73	0	0.29	0.86	0	0.73	1.19
YBR260C	15.6	4.32	3.27	8.22	8.84	5.54	8.19	9.57	7.2	10.08	8.01	6.74	7.39	7.52	6	8.91	5.31	5.9	17.92	7.44	5.48	5.07	15.8	2.49		YBR260C	6.47	5.22	3.34	5.48	4.62	2.55	5.29	0	24.8	1.84	5.7	4.88	0.65	6.52	0	2.44	2.83	0	0.91	6.57	0	3.98	6.87
YBR261C	28.37	15.56	10.09	15.43	16.7	13.51	11.73	13.69	14.7	6.47	14.17	13.38	7.73	19.52	6.61	10.22	6.96	6.98	26.2	9.99	12.06	10.97	25.66	3.27		YBR261C	11.22	33.85	21.23	14.98	57.33	29.87	21.6	0	0	6.63	38.71	19.7	2.35	33.36	0	8.8	0	17.9	7.63	20.98	0	16.47	19.3
YBR262C	693.52	701.4	489.47	440.96	435.43	411.7	432.55	401.76	340.14	401.9	323.76	268.03	383.92	235.56	280.84	288.57	385.15	245.08	281.26	286.51	251.6	429.42	341.08	261.02		YBR262C	35.39	52.02	60.91	47.45	92.88	37.66	28.64	0	0	40.75	24.04	22.92	19.26	34.18	0	34.74	41.85	0	8.93	26.46	0	22.5	32.46
YBR263W	37.38	6.11	10.56	20.24	16.08	14.41	17.46	18.48	15.44	13.48	21.38	19.64	9.11	19.79	15.81	19.62	11.27	18.51	25.78	19.39	10.76	11.48	34.38	8.01		YBR263W	49.47	28.18	30.04	54.26	60.43	33.72	69.31	21.23	0	32.52	82.86	51.52	15.67	64.27	3.43	38.9	20.04	21.07	9.83	69.89	23.79	29.56	59.63
YBR264C	38.54	19.4	31.46	27.34	19.87	20.51	37.82	26.63	22.64	45.31	27.17	17.92	31.08	36.51	39.72	34.57	35.8	41.42	72.69	39.98	25.97	34.94	46.03	19.34		YBR264C	5.38	4.1	3.82	9.34	4.99	1.15	9.5	33.72	0	2.07	5.85	3.65	5.86	7.56	0	4.47	12.73	44.64	0	10.06	18.89	3.42	10.49
YBR265W	46.75	7.64	13.21	17.54	15.4	19.61	18.53	22.94	16.97	19.87	23.53	23.35	16.87	17.74	21.44	18.86	17.08	16.96	41.77	20.3	7.17	16.74	36.86	8.55		YBR265W	30.51	38.15	29.03	28.08	48.86	29.17	31.6	26.55	0	15.18	50.66	24.22	7.69	32.75	1.14	14.08	26.73	11.72	5.7	29.93	19.83	24.15	31.1
YBR266C	107.37	0.71	26.9	0.46	68.39	0	30.31	4.64	33.04	16.12	0	7.26	25.3	2.13	7.06	0	7.65	0	0	5.96	1.81	17.31	15.71	8.61		YBR266C	0	0	4.26	0	0	0	0	0	0	2.16	0	0.07	0	0	0	0.96	0	0	2.9	5.31	0	0	0
YBR267W	81.78	19.6	23.85	49.24	78.83	51.39	36.39	62.59	81.61	42.17	54.31	42.98	48.1	28.13	32.57	32.29	27.23	23.66	35.47	43.38	15.7	29.61	107.02	28.92		YBR267W	9.66	28.93	20.38	7.28	40.35	24.77	10.98	0	0	7.87	21.48	18.13	1.79	13.11	0.89	2.74	0	0	3.68	14.22	0	18.46	9.06
YBR268W	387.44	506.63	388.73	414.54	398.58	407.27	394.18	432.6	352.35	363.93	297.59	208.17	245.55	394.14	368.74	291.25	281.52	294.53	334.85	337.9	271.77	312.27	278.69	301.91		YBR268W	39.91	43.45	39.15	37.2	67.22	40.54	26.69	113.63	0	20.89	27.11	33.56	9.87	9.56	0	27.4	0	75.21	18.31	33.91	63.67	29.47	41.59
YBR269C	196.38	115.97	69.45	150.86	99.21	82.19	270.82	158.27	92.2	168.97	131.2	105.68	70.96	147.99	106.16	96.23	129.72	83.05	111.7	81.98	52.8	106.19	193.75	80.53		YBR269C	33.67	26.95	19.48	31.24	21.4	15.81	26.22	62.03	51.24	3.8	40.35	25.04	0	38.25	0	47.86	46.84	41.06	7.5	25.91	0	14.69	32.92
YBR270C	17.96	9.46	9.35	12.84	11.87	10.72	10.68	14.27	7.96	8.48	10.03	9.12	6.27	13.19	9.4	12.68	8.47	11.54	17.82	9.86	6.86	8.04	14.13	4.82		YBR270C	1.2	0.33	1.39	0.47	0.93	0.8	0.22	0	0	0.58	1.02	0.74	0.41	0	0	0.34	0	0	0	0.37	0	1.06	0.52
YBR271W	30.56	20.16	9.51	18.18	29.68	22.01	11.24	21.16	26.69	13.61	18.23	18.68	12.15	7.67	9.91	15.65	13.12	10.96	16.87	19.82	5.68	16.65	28.31	9.23		YBR271W	3.66	7.98	5.78	2.89	15.39	6.71	2.99	0	0	3.9	7.74	4.02	0.55	4.64	1.65	1.38	0	0	0.51	3.3	0	5.6	3.03
YBR272C	24.03	6.25	5.41	12.24	11.29	11.57	17.23	14.75	8.34	17.01	12.04	9.76	8.63	14.6	13.41	19.06	12.94	16.16	24.91	14.58	8.81	11.75	17.35	9.19		YBR272C	4.51	1.89	2.18	6.02	2.68	6.09	5.36	5.43	0	5.99	5.66	2.68	1.42	3.35	0	4.59	0	0	3.5	6.27	0	3.19	5.97
YBR273C	52.62	12.24	21.18	31.95	31.73	27.6	38.55	39.4	34.99	34.92	36.5	31.19	11.98	24.38	24.19	22.47	26.21	18.37	36.83	23.16	13.8	18.08	45.3	19.83		YBR273C	6.21	10.78	8.38	14.09	11.39	7.44	8.57	12.16	0	4.47	15.56	10.89	2.11	8.52	0.79	9.53	13.77	24.15	1.96	7.02	0	9.74	9.12
YBR274W	28.17	9.83	25.51	19.49	20.27	19.3	17.23	20.36	16.23	14.38	14.55	13.24	16.75	22.51	17.79	18.7	17.59	17.27	27.84	17.46	19.39	19.79	15.81	9.43		YBR274W	1.87	1.19	0.89	3.44	5.05	1.82	4.59	0	0	2.39	4.66	2.5	0.85	2.19	0	2.24	3.69	0	0.39	3.3	10.94	1.87	3.57
YBR275C	6.39	2.8	1.97	6.25	7.79	3.52	13.4	9.07	8.06	15.47	14.87	9.95	9.13	16.94	12.75	11.8	10.66	8.74	16.98	12.17	7.9	12.84	13.19	9.34		YBR275C	0.93	0.38	0.2	1.41	0.84	0.46	1.72	1.22	0	1.34	3.54	1.34	0.21	2.25	0	1.15	0.92	0	0.1	2.91	0	0.16	1.43
YBR276C	25.28	5.24	6.8	14.6	12.62	10.96	16.45	14.89	11.66	18.01	18.12	13.47	10.43	19.98	14.93	17.38	12.71	12.77	25.12	15.95	9.36	18.34	20.53	7.16		YBR276C	2.91	0.42	0.61	4.13	1.5	0.52	1.86	0	0	0.74	3.95	1.56	0.26	3.07	0	0.81	0	0	0	3.02	0	1.17	2.45
YBR277C	8.02	0	9.29	19.18	6.12	15.46	33.17	13.61	19.89	5.75	6.5	5.88	14.03	18.85	18.16	9.5	12.33	5.2	9.94	9.53	3.13	0	8.88	10.12		YBR277C	0.23	0	0	0	0	0	2.62	0	0	0	0	2.95	0	0	0	0	0	0	0	0	0	0	0
YBR278W	223.18	167.24	160.68	274.24	248.67	145.29	288.97	227.34	229.05	347.54	227	187.58	214.72	257.05	196.6	178.57	236.51	165.96	191.31	205.75	126.38	227.51	171.61	182.53		YBR278W	2.01	6.35	4.78	5.02	8.19	1.69	6.5	0	0	2.04	11.53	9.98	0	13.04	0	8.41	0	0	0	3.97	0	5.62	3.65
YBR279W	76.29	104.16	105.59	86.98	142.58	109.08	130.65	125.25	133.21	123.68	96.38	89.61	123.37	125.2	108.06	131.8	185.26	127.31	150.63	147.67	125.12	179.17	179.65	168.47		YBR279W	10.23	10.73	10.15	12.86	10.53	7.46	9.2	0	0	5.82	9.53	8.3	1.55	10.32	1.54	5.3	8.97	15.72	0.48	12.75	0	7.1	11.3
YBR280C	12.26	11.34	5.39	9.47	5.09	6.42	15.56	10.86	6.05	11.17	9.69	6.07	5.76	9.64	7.45	9.15	7.36	8.14	17.21	9.04	7.67	8.17	12.95	4.28		YBR280C	2.01	1.1	0.96	3.97	2.72	2.01	2.22	0	0	0.97	4.27	2.1	2.05	3.09	0	7.7	0	5.22	0.32	2.51	0	1.51	3.32
YBR281C	11.95	7.98	4.83	7.08	5.76	5.42	8.38	6.4	8.33	11.03	5.81	3.15	7.93	6.12	8.32	11.67	9.82	11.04	16.8	7.65	6.74	8.25	15.78	6.7		YBR281C	4.07	1.83	1.57	5.73	2.6	1.41	3.26	0	0	1.7	5.29	2.84	0.96	4.2	0	3.34	0	0	1.34	5.85	0	1.63	5.68
YBR282W	177.95	152.69	173.77	203.85	185.02	159.61	240.62	168.59	184.87	219.07	167.72	141.26	197.1	161.32	152.76	146.23	177.98	133.16	203.54	161.81	185.73	181.24	181	192.32		YBR282W	16.06	5.83	15.6	26.73	30.3	3.8	19.69	27.94	0	6.85	13.33	10.45	7.28	7.83	0	7.41	21.1	36.98	0	14.45	0	10.08	20.45
YBR283C	60.45	16.79	19.81	51.47	41.7	47.38	43.64	52.01	31.22	31.06	63.5	50.17	23.95	46.39	45.41	36.65	34.15	46.16	77.18	47.03	24.52	34.43	55.99	20.51		YBR283C	47.1	22.32	22.96	63.09	69.59	43.28	65.82	26.53	26.31	31.22	88.15	56.32	14.29	63.37	2.06	45.17	40.08	63.23	13.68	65.88	11.89	31	72.65
YBR284W	7.85	2.66	1.92	4.07	4.84	2.07	4.42	3.62	4.14	3.63	2.73	2.03	1.96	4.32	2.26	4.49	1.78	3.03	9.24	3.95	3.5	5.55	3.71	1.49		YBR284W	0.39	0.32	0.62	0.47	0.91	0.21	0.29	0	0	0	0.67	0.49	0.27	0.69	0	0.89	0	0	0	0	0	0.42	0.34
YBR285W	141.69	164.81	174.63	187.52	70.74	158.06	221.89	212.33	88.83	148.7	79.64	83.97	74.65	199.89	156.64	74.97	75.58	97.13	135.23	89.09	53.42	69.69	75.57	64.01		YBR285W	9.15	5.98	10.75	7.22	2.82	4.87	5.38	28.65	0	7.02	2.48	6.77	7.47	4.82	0	31.77	21.63	0	2.31	6.84	0	1.94	3.15
YBR286W	169.54	107.2	74.3	154.37	135.69	86.15	191.76	170.1	90.88	141.6	186.35	162.64	65.6	159.8	145.81	77.22	66.72	65.39	156.32	98.07	44.55	60.27	136.87	45.59		YBR286W	205.33	149.33	123.16	192.54	180.89	134.28	227.6	81.23	71.05	172.15	260.28	176.31	96.72	252.88	19.15	251.5	104.64	170.78	51.58	223.57	139.22	98.28	167.54
YBR287W	118.61	30.47	54.26	69.23	45.81	60.23	51.43	50.98	49.4	24.77	46.45	41.33	17.43	46.98	33.38	35.47	26.06	48.07	51.35	22.28	14.65	16.84	42.1	14.67		YBR287W	23.48	19.5	25.38	19.77	39.93	25.2	27.81	6.23	10.3	21.38	45.94	26.5	6.5	29.35	3.22	36.21	4.71	0	7.03	20.83	0	25.44	23.26
YBR288C	44.68	20.18	16.78	38.4	31.8	34.81	29.05	36.06	30.19	24.63	24.13	23.72	22.29	35.92	25.43	31.01	31.6	30.76	39.9	35.24	17.94	25.28	28.47	16.62		YBR288C	5.86	5.63	6.02	8.7	15.16	3.3	11.41	16.19	0	5.29	12.87	9.99	1.88	8.47	1.4	6.63	0	0	0.87	11.16	0	5.48	12.25
YBR289W	30.57	8.49	9.53	15.02	15.3	8.48	24.04	14.9	21.12	29.94	16.95	14.17	17.16	15.32	15.18	21.38	14.95	16.04	40.35	17.76	24.15	19.86	44.17	14.3		YBR289W	3.75	2.44	2.31	4.51	3.3	2.52	4.52	2.68	13.3	3.6	5.36	3.62	0.7	4.5	1.04	3.14	6.08	9.89	0	6.79	0	1.7	5.9
YBR290W	347.45	461.48	413.4	388.02	570.41	377.02	499.28	370.93	567.24	428.02	337.75	264.52	307.58	310	278.61	244.25	411.82	266.38	226.57	295.7	323.74	365.35	315.72	449.78		YBR290W	6.19	13.79	8.84	10.21	19.55	12.28	10.77	17.63	0	1.08	10.31	3.99	3.06	6.92	3.42	6.16	0	0	2.84	10.87	0	8.15	6.78
YBR291C	15.54	5.55	1.2	8.11	8.66	5.66	7.79	11.33	9.87	13.85	6.22	4.59	11.65	9.28	10.08	11.19	6.21	12.32	16.58	11.25	8.6	8.69	10.27	5.82		YBR291C	1.23	1.68	1.01	4.37	4.28	1.64	3.17	0	0	2.36	1.67	2.28	0.84	0	1.25	1.16	0	0	0	3.84	0	1.09	1.77
YBR292C	5.86	44.97	9.72	8.21	8.77	7.64	5.84	9.5	12.49	2.88	4.72	2.86	2.48	3.13	8.69	11.6	2.51	11.52	13.86	12.15	6.34	7.04	7.23	4.72		YBR292C	0	0	0	0	0	0	0	0	0	0	0	0	0	2.19	0	0	0	0	0	0	0	0	0
YBR293W	4.34	0	3.43	2.65	1.86	3.59	3.3	2.68	4.41	3.86	2.67	2.83	4.21	2.21	2.7	4.76	2.13	4.06	9.03	3.64	3.13	4.47	4.34	1.67		YBR293W	0	0	0.19	0.83	0.27	0	0.52	0	0	0.68	0.96	0.11	0	0.62	0	0.27	0	0	0	0.66	0	0.37	0.61
YBR294W	5.32	0	3.53	4.01	4.3	2.1	3.65	3.57	3.81	3.87	3.2	0.73	2.53	2.39	2.46	4.6	1.64	2.86	8.68	3.97	6.45	4.61	6.7	0.69		YBR294W	0	0	0	0	0	0.1	0	0	0	0	0	0	0	0	0	0	0	0	0	0	0	0	0
YBR295W	8.81	1.69	4.39	3.53	4.62	3.66	4.51	4.12	5.01	3.39	4.89	1.65	2.74	2.75	2.83	4.81	2.65	3.99	11.06	5.18	5.4	4.59	4.71	1.77		YBR295W	0.25	0.14	0.26	0.3	0.19	0.13	0.09	0	0	0	0.25	0.15	0	0.22	0	0.09	0	0	0	0.31	0	0.13	0.36
YBR296C-A	0	0	0	0	0	0	0	0	0	0	0	0	0	0	0	0	0	0	0	0	0	0	0	0		YBR296C-A	0	0	0	0	0	0	0	0	0	0	0	0	0	0	0	0	0	0	0	0	0	0	0
YBR296C	18.92	7.65	9.37	5.45	11.44	11.26	1.19	10.77	9.77	1.96	6.07	4.22	3.94	1.95	2.56	3.35	0.86	0.98	7.37	3.96	7.18	2.4	4.31	1.87		YBR296C	0.57	14.63	20.41	0	17.91	18.82	0.42	4.43	7.32	1.09	5.38	7.68	0	2.98	0	0.53	3.35	0	3.57	1.23	0	9.79	0.65
YBR297W	10.08	4.83	6.64	6.68	3.77	5.48	4.7	5.62	5.46	3.72	6.31	1.52	3.55	4.3	4.44	5.15	3.74	4.23	13.6	8.08	6.14	7.06	8.28	7.85		YBR297W	0	0.97	0.73	0.56	1.38	2.09	0.79	0	0	0	0	0.66	0	0	0	0.18	0	0	0.45	1.07	0	0.5	0.82
YBR298C-A	0	0	0	0	0	0	0	7.78	0	0	7.74	0	12.22	0	4.27	5.17	0	0	39.99	7.5	0	0	0	0		YBR298C-A	0	0	0	0	0	0	0	0	0	0	0	0	0	0	0	0	0	0	0	0	0	0	0
YBR298C	20.47	7.09	12.26	11.22	8.76	7.76	13.88	13.64	15.49	16.94	13.57	6.32	8.62	16.47	13.88	14.19	17.45	14.53	28.8	14.85	12.32	13.32	27.56	11.16		YBR298C	0	0	0	0.21	0.2	0	0	0	0	0	0	0	0	0	0	0	0	0	0	0	0	0	0
YBR299W	1.19	0.62	2.7	1.35	1.44	0.21	0.26	0.53	1.09	0.88	1.69	1.11	0	0.68	0.42	4.22	1.4	0.99	5.28	5.14	5.64	1.96	3.22	1.04		YBR299W	0.28	0	0	0	0	0	0.2	0	0	0	0	0.09	0	0	0	0.05	0	0	0	0.09	0	0	0.24
YBR300C	2.75	0	8.44	3.39	0	0	0	0	1.32	0	0	2.49	0	0	0	3.63	0	1.45	9.01	3.98	5.5	4.07	0	8.19		YBR300C	0	0	0.2	0	0	0	0	0	0	0	0	0	0	0	0	0	0	0	0	0	0	0	0
YBR301W	0	0	0	1.84	5.28	0	0	2.14	4.11	1.36	3.7	2.78	5.23	0	0	3.83	9.33	0	3.96	1	18.24	12.02	11.76	0		YBR301W	0	0	0	0	0.23	0	0	0	0	0	0	0	0	0.23	0	0.33	0	0	0	0.15	0	0	0
YBR302C	95.45	97.26	78.33	112.1	84.26	98.32	114.41	102.85	72.81	107.28	105.86	97.56	60.99	127.32	104.46	68.36	90.4	87.59	81.99	88.5	75.04	93.1	71.1	82.34		YBR302C	10.7	10.89	10.1	11.79	12.88	9.65	12.53	4.49	0	14.68	19.96	14.96	5.23	16.09	0	18.6	13.55	9.49	2.43	16.28	2.68	8.33	13.89
YCL001W-A	6.74	7.39	3.2	4.63	1.44	4.47	3.08	7.29	1.64	5.68	5.18	5.65	8.17	9.28	7.43	10.4	0	8.84	13.33	12.99	10.42	6.95	4.76	3.1		YCL001W-A	0	0	0	0	0	0	0	0	0	0	0	0	0	0	0	0	0	0	0	0	0	0	0
YCL001W-B	55.33	32.67	14.13	13.64	25.5	24.67	37.37	55.21	43.57	62.72	41.19	16.65	36.1	50.09	68.17	70.49	73.1	83.72	117.78	88.31	36.84	30.7	36.8	20.58		YCL001W-B	0	0	0	0	0	0	0	0	0	0	0	0	0	0	0	0	0	0	0	0	0	0	0
YCL001W	287.05	274.81	329.11	339.26	308.3	348	331.85	386.93	303.05	380.78	389.36	376.97	349.14	434.67	458.99	288.99	293.2	380.96	324.84	382.79	291.94	297.97	221.9	341.7		YCL001W	30.5	30.02	20.67	51.82	46.19	24.35	56.1	18.37	0	29.27	52.59	32.2	7.98	32.96	7.13	35	27.75	0	4.44	45.32	20.59	21.13	44.38
YCL002C	70.91	81.99	62.41	72.92	74.23	71.08	70.24	104.82	67.43	67.57	72.58	67.26	65.22	89.15	89.71	75.67	74.1	88.8	85.24	90.41	52.69	77.05	56.45	40.62		YCL002C	1.46	1.98	3.88	2.3	6.18	4.26	3.75	0	0	0	5.93	1.35	0	2.56	0	2.47	0	0	0.92	2.72	0	3.6	4.17
YCL004W	14.27	2.85	1.85	5.94	6.11	4.08	6.95	7.41	6.32	7.65	3.19	3.44	3.77	5.95	5.5	8.01	10.5	7.17	13.23	6.73	7.22	5.79	9.61	4.48		YCL004W	0.95	1.89	1.38	0.5	0.98	1.18	1.63	0	0	0	3.65	0.88	0.86	1.11	0	1.79	3.74	0	0	0.79	0	0.56	0.36
YCL005W-A	286.75	55.29	95.64	179.81	99.94	212.69	108.54	134.76	132.63	126.98	262.49	307.58	107.82	159.38	301.23	168.17	154.32	219.78	379.96	199.52	128.44	100.42	213.8	148.32		YCL005W-A	625.93	516.04	376.52	634.43	772.91	416.48	568.84	768.82	0	518.18	756.71	287.63	100.19	547.67	223.7	333.67	290.3	508.89	123.1	537.68	430.79	244.76	597.99
YCL005W	24.36	10.2	10.29	14.91	19.24	10.78	19.09	19.63	14.36	19.15	23.81	12.99	21.03	19.43	16.81	22	15.97	21.78	42.57	28.03	24.92	19.17	24.61	19.27		YCL005W	5.28	3.29	2.89	8.34	8.74	3.21	6.66	0	0	8.69	7.18	3.49	2.05	5.3	0	5.13	8.93	15.65	0.95	3.76	0	2.93	6.92
YCL007C	26.35	0	17.34	17.63	24.91	18.97	22.01	24.97	22.74	21.88	26.83	25.95	31.39	22.81	15.87	21.22	7.9	11.52	39.51	13.95	19.09	28.89	37.03	2.57		YCL007C	0	4.57	3.78	4.34	4.17	1.46	0	0	0	0	1.85	0	0	2.3	0	0	0	0	2.95	5.12	0	2.78	0
YCL008C	15.85	2.03	5.26	11.64	14.24	9.19	15.39	14.28	13.3	13.24	14.2	10.07	8.51	11.03	10.19	14.46	11.8	12.47	25.01	13.7	14.29	13.97	28.71	9.79		YCL008C	4.05	3.68	4.43	7.1	10.77	6.47	12.25	0	0	4.32	11.01	5.41	0.61	9.49	0	7.99	0	0	1.14	8.42	7.9	4.45	6.45
YCL009C	14.55	21.28	12.66	16.94	14.02	15.27	27.11	27.35	19.81	19.07	27.95	26.43	11.17	18.54	21.59	16.97	11.9	12.95	39.12	23.37	11.25	15.83	54.78	10.61		YCL009C	101.58	49.84	37.35	95.97	83.44	65.37	126.87	37	45.85	87.27	135.58	60.1	25.71	90.75	2.39	69.13	20.95	48.98	9.69	95.31	41.46	36.92	103.93
YCL010C	30.52	10.04	10.13	18.17	25.47	15.67	26.8	22.62	15.62	26.56	24.38	14.92	11.83	15.4	21.99	17.27	15.73	17.15	40.96	19	9.43	16.78	37.7	18.27		YCL010C	4.46	2.02	2.94	3.52	5.16	5.93	3.83	0	0	8.56	16.15	2.98	3.03	9.79	0	4.77	8.79	15.41	0.94	7.41	0	3.94	7.67
YCL011C	124.21	48.4	56.59	100.29	116.46	83.38	105.85	101.96	104.98	90.61	110.22	86.76	69.31	112.94	73.54	100.37	106.66	84.51	102.53	94.22	51.53	90.39	151.96	71.87		YCL011C	11.14	16.25	10.87	18.83	33.79	13.55	17.86	31.16	0	16.8	36.48	25.52	3.25	24.8	1.61	23.59	0	0	7.03	18.35	0	11.95	22.58
YCL012C	68.86	28.32	97.99	70.95	33.16	59.89	35.33	79.75	28.33	30.21	52.89	39.68	18.77	48.7	48.88	48.7	29.57	56.44	56.42	39.55	37.25	20.7	39.49	19.82		YCL012C	12.57	29.67	39.51	19.84	27.5	15.61	18.5	0	0	12.07	25.62	18.09	0	23.92	0	15.04	0	0	13.22	23.51	0	18.51	19.22
YCL014W	6.13	3.71	2.68	2.24	3.46	1.99	4.89	3.78	6.1	9.24	6.07	3.57	8.85	5.93	7.27	10.1	8.03	8.71	18.52	9.93	11.4	9.05	12.55	3.9		YCL014W	2.84	0.5	0.26	2.6	1.13	0.44	2.29	0	0	0.35	1.99	1.05	0.12	0.88	0	0.62	0	0	0.23	3.2	0	0.29	3.89
YCL016C	65.48	12.36	32.07	28.17	29.74	29.87	31.27	27.56	27.02	34.8	19.91	14.17	25.49	22.98	29.93	25.31	27.19	26.57	33.61	23.39	15.68	27.75	28.5	18.16		YCL016C	3.66	2.49	1.37	2.89	2.12	2.19	2.69	0	0	0.88	3.73	2.4	1.24	3.21	0	2.59	0	0	0.58	3.7	0	1.62	5.24
YCL017C	32.47	19.52	14.94	17.4	21.1	14.63	15.3	19.66	20.03	14.22	16.83	12.24	12.28	13.4	10.21	15.49	12.77	13.85	27.21	17.25	16.08	16.46	30.2	8.51		YCL017C	12.67	22.69	20.22	17.09	36.03	20.05	20.6	5.22	0	18.55	25.13	22.62	2.72	23.42	5.4	12.71	3.94	13.82	5.47	19.73	5.85	17.07	18.35
YCL018W	0	0	0	0.45	0	0	0	0	0	0	0	0	0	0	0	0	0	0	0	0	0	0	0	0		YCL018W	0	0	0	0	0	0	0	0	0	0	0	0	0	0	0	0	0	0	0	0	0	0	0
YCL021W-A	9.91	0	9.4	9.07	10.6	4.1	14.68	12.24	3.62	13.9	6.09	8.3	9.6	12.12	8.4	6.11	0	6.5	22.67	11.75	21.44	17.02	15.73	9.12		YCL021W-A	0	0	0.33	1.9	0	0	0	0	0	0	0	0	0	0	0	0.91	0	0	0	0	0	1.7	0
YCL022C	17.56	0	0	31.31	19.86	3.86	56.03	35.12	6.95	26.02	33.79	25.73	14.2	47.04	27.04	15.12	18.39	14.87	10.48	19.23	0	13.99	19.82	21.27		YCL022C	0.95	0	0	0	0	0	1.99	0	0	1.07	1.67	0	0	0	0	0	0	0	0	0	0	0	0
YCL023C	0	0	0	0	7.64	1.97	1.36	1.84	1.46	6.36	7.3	0	0	0	2.02	2.45	0	1.11	17.34	3.53	11.04	0	2.1	2.74		YCL023C	0	0	0	0	0	0	0	0	0	0	2	1.84	3.94	0	0	0	0	0	0	0	0	0	0
YCL024W	13.04	3.34	4.62	13.1	10.21	4.16	18.6	18.16	11.33	13.84	21	17.51	8.04	23.07	12.78	11.56	6.51	9.38	20.82	14.59	9.78	12.06	13.94	9.03		YCL024W	1.82	0	0.18	1.64	0.46	0.63	2.07	0	0	1.59	5.95	3.19	1.21	3.38	0.3	3.02	1.75	0	0.37	2.4	0	0.26	1.27
YCL025C	66.34	76.51	55.32	35.64	35.87	46.48	51.17	55.71	44.93	84.18	44.15	36.22	44.16	38.84	50.83	49.01	44.45	39.56	71.5	57.72	48.92	56.52	105.45	46.99		YCL025C	23.32	41.61	54.87	31.99	20.97	42.61	24.01	11.91	6.56	16.19	16.1	11.17	7.24	12.81	4.11	9.75	6	10.51	5.55	24.2	40.04	25.37	24.56
YCL026C-A	5.95	0	0	1.59	0	1.53	0.53	0.71	3.39	5.2	0	0.65	1.12	0.71	2.35	3.81	0	0.87	7.23	3.43	2.86	3.18	2.45	0		YCL026C-A	2.25	0	0.15	0	0.87	0	0	0	0	0	0	0	0	0	0	0.43	0	0	0	0	0	0	0
YCL026C-B	1.32	0	6.59	1.06	0	0	0	0	0	1.95	0	0.65	1.12	2.12	1.96	2.86	1.14	0.87	6.26	0.69	4.29	3.18	5.72	2.13		YCL026C-B	1.13	1.84	1.54	7.11	0	4.2	4.15	0	0	0	0.77	0	0	0	0	1.28	0	0	0	2.11	0	0.4	2.58
YCL027W	5.29	4.35	3.14	1.67	2.55	1.21	1.81	0.2	4.19	2.97	2.85	0.18	1.6	1.01	1.01	3.4	2.27	2.36	11.29	3.53	7.36	1.36	2.57	2.44		YCL027W	0	0	0.04	0	0	0	0	0	0	0	0	0	0	0	0	0	0	0	0	0	0	0	0
YCL028W	53.2	22.9	14.86	37.25	40.96	20.03	48.22	34.93	34.15	32.73	38.76	32.82	18.13	38.05	24.48	22.91	23.91	18.09	54.13	26.05	19.37	11.96	67.24	18.03		YCL028W	36.44	30.91	30.96	46.98	49.06	29.99	49.25	19.9	0	24.39	63.02	39.59	11.53	52.45	2.57	38.39	30.06	35.13	10.16	47.25	7.44	28.73	39.59
YCL029C	28.62	6.92	20.95	19.33	21.61	16.59	18.35	19.73	20.57	17.49	20.12	15.21	13	12.3	12.17	16.72	12	14.19	24.95	17.07	15.12	15.18	25.61	9.81		YCL029C	1.92	2.72	2.1	2.12	7.41	4.09	2.54	0	0	3.69	5.74	4.38	1.05	4.72	0	1.89	0	0	0.48	3.35	6.74	3.8	4.84
YCL030C	16	7.95	11.85	10.79	12.41	9.54	18.1	15.55	15.02	21.71	11.76	10.69	28.31	17.12	20.76	43.18	38.94	34.64	66.3	38.81	32.13	45.39	59.84	34.69		YCL030C	40.01	6.41	6.27	60.19	6.66	5.64	41.13	12.29	0	27.86	7.33	6.83	4.8	12.06	1.19	6.81	18.56	8.13	2.47	40.21	48.19	4.78	52.96
YCL031C	504.09	372.17	376.36	351.1	429.13	417.98	292.95	341.99	357	281.48	272.01	262.69	324.6	267.21	246.71	208.66	267.3	226.81	199.87	248.82	225.57	296.26	233.19	265.52		YCL031C	10.56	32.47	33.09	23.52	47	28.43	19.19	9.73	0	7.15	41.35	33.14	1.69	20.18	3.77	13.37	22.04	0	10.19	27.48	21.8	27.64	23.14
YCL032W	82.13	27.72	26.97	35.68	28.39	24.07	43.46	24.07	27.98	46.7	27.18	20.59	17.86	23.83	25.52	23.61	27.9	26.83	36.81	26.53	25.39	20.98	41.25	16.97		YCL032W	1.54	1.95	2.52	3.64	4.35	2.46	5.66	0	0	0.98	5.57	2.06	0.7	6.3	0	3.87	0	0	0	3.51	0	1.99	4.11
YCL033C	61.69	56.83	51.88	100.19	28.34	58.17	108.32	102.24	41.4	68.69	94.63	47.45	53.02	102.99	76.11	49.75	43.79	52.31	95.83	67.41	35.59	55.38	37.58	42.42		YCL033C	15.42	3.82	5.17	16.59	12.99	6.71	13.41	43.9	0	5.38	25.71	9.94	9.53	13.54	0	23.29	16.58	0	5.31	19.21	0	2.97	8.84
YCL034W	39.49	11.23	18.45	34.69	26.73	22.89	49.73	43.95	21.96	59.49	46.24	27.75	42.18	48.21	37.66	48.23	40.18	36.83	79.03	39.71	33.55	45.72	72.26	24.51		YCL034W	17.95	6.24	8.17	20.06	16.55	10.61	25.67	7.81	0	14.35	18.62	12.61	0.68	25.39	1.01	18.07	11.79	10.34	1.89	16.46	0	6.16	17.43
YCL035C	854.49	638.59	985.42	1136.23	529.53	651.02	1548.1	1023.78	712.91	1144.16	756.23	613.77	750.39	1222.04	1332.29	901.18	996.77	1290.43	1113.76	988.48	908.11	877.4	700.45	1081.59		YCL035C	122.43	61.39	59.42	218.56	109.44	36.01	156.44	50.45	83.37	111.29	111.6	81.47	70.13	121.64	13.05	225.06	190.52	0	28.45	172.64	0	56.9	142.2
YCL036W	41.15	11.65	34.72	20.81	27.79	30.41	18.85	29.9	31.8	22.87	22.85	16.49	30.9	7.76	23.01	12.39	9.85	12.83	14.74	27.3	20.8	21.09	28.75	14.68		YCL036W	1.15	4.38	2.83	1.81	9.54	5.66	3.17	0	0	2.76	5.86	2.3	0.78	2.02	0	0.87	0	0	1.45	2.69	0	2.84	1.32
YCL037C	24.74	17.58	23.57	26.06	28.13	14.47	21.02	21.04	33.42	18.23	27.34	20.16	14.38	10.79	13.86	20.28	18.1	10.51	29.52	25.9	39.15	17.63	32.53	8.86		YCL037C	60.89	66.31	50.82	67.74	104.57	65.23	87.01	30.56	0	44.2	119.84	73.18	14.87	81.23	7.11	37	36.93	40.46	17.24	107.5	47.95	46.88	100.91
YCL038C	57.13	37.83	39.99	37.44	28.16	41.69	23.6	38.47	30.05	35.86	33.76	29.27	15.79	35.16	26.96	20.37	24.45	27.64	46.65	35.79	37.52	19.75	23.89	10		YCL038C	4.67	5.08	5.18	6.87	15.13	13.9	6.18	4.87	0	4.78	17.11	7.77	1.27	8.47	1.89	7.05	7.36	0	1.18	6.59	0	5.27	10.16
YCL039W	25.72	24.8	25.57	18.72	19.73	13.97	23.7	19.34	18.66	18.8	19.77	11.91	10.33	21.81	13.93	15.75	13.66	13.77	35.83	31.19	28.23	17.03	21.18	9.21		YCL039W	3.18	3.34	2.98	5.68	2.94	4.06	4.21	0	0	2.44	5.32	3.59	0.86	3.53	0	3.92	0	0	1.07	4.09	0	2.24	4.85
YCL040W	74.4	26.85	22.57	68.81	45.69	31.08	100.63	71.61	38.29	87.04	73.53	58.13	28.67	83.79	66.84	40.85	41.37	41.4	115.72	59.66	45.4	30.83	106.29	35.38		YCL040W	119.85	28.3	32.07	201.62	67.22	50.21	108.88	25.92	17.13	102.29	170.9	121.49	94.59	254.64	12.74	291.53	70.48	20.59	32.16	117.59	75.53	45.96	119.94
YCL041C	6.1	6.57	5.68	15.77	17.95	7.14	10.93	14.52	15.02	8.87	28.53	14.2	8.71	17.4	10.9	9.24	8.82	6.17	24.11	19.53	5.56	10.29	17.97	8.27		YCL041C	7.29	19.06	9.59	17.26	11.26	22.94	8.58	0	0	11.2	16.84	24.28	3.97	16.65	0	6.06	17.25	0	3.68	12.71	76.79	7.73	9.2
YCL042W	78.67	84.56	104.48	214.36	169.69	77.54	256.22	207.49	186.6	236.53	233.49	226.18	109.43	185.23	182.02	118.97	194.57	78.41	197.1	174.66	115.76	136.21	248.74	144.54		YCL042W	8.05	7.31	6.96	14.81	8.28	7.14	7.89	0	0	5.15	14.57	29.77	29.2	21.19	0	15.19	0	0	3.38	18.38	0	8.52	16.91
YCL043C	78.77	69.56	28.24	72.16	95.28	54.46	64.64	80.75	71.78	50.51	113.93	103.25	31.68	78.37	49.58	38.35	32.07	30.19	92.91	60.04	27.61	28.46	74.68	22.35		YCL043C	144.33	101.91	64.66	189.42	163.48	119.91	170.86	103.64	48.92	125.79	284.67	171.51	58.74	229.09	11.49	144.34	111.81	91.46	33.4	155.32	138.26	75.91	161.85
YCL044C	15.13	11.06	21.52	12.7	29.13	10.72	13.99	13.24	17.82	12.98	16.78	12.21	9.37	10.54	8.4	11.24	16.91	7.87	25.7	26.16	23.9	14.44	26.69	7.74		YCL044C	7.78	17.82	11.29	7.1	15.48	14.16	10.54	6.41	0	7.85	11.12	8.96	1.11	7.9	0	6.18	9.68	0	2.07	9.94	21.54	8.53	8.68
YCL045C	22.55	16.8	12.51	20.06	20.56	15.56	20.18	20.87	21.1	16.57	26.09	20.98	8.96	18.42	16.33	18.59	17.47	14.65	41.92	27.06	15.67	14.31	28.66	8.92		YCL045C	16.14	11.04	11.92	19.28	21.48	14.5	21.29	0	0	10.34	33.02	20.58	4.79	22.93	3.36	15.11	13.6	17.18	3.81	27.47	14.59	12.15	26.87
YCL046W	19.26	15.56	20.19	24.48	33.61	6.08	11.33	15.67	26.91	24.47	26.96	6.87	5.39	11.82	10.31	19.8	15.09	8.24	37.55	28.18	23.7	0.18	27.81	11.29		YCL046W	7.28	26.47	22.56	0	17.8	21.02	21.17	54.09	0	0	17.21	8.39	0	5.92	0	7.63	59.2	0	10.61	19.73	59.89	4.89	7.38
YCL047C	39.01	13.46	29.1	27.04	34.14	25.66	24.49	42.16	33.28	30.14	31.11	18.63	26.76	37.52	23.66	31.87	49.68	34.77	51.39	55.02	37.93	42.16	51.96	26.84		YCL047C	7.47	2.44	2.75	4.71	4.04	3.97	7.69	0	38.65	7.17	7.1	4.61	1.02	5.9	0	3.38	0	0	1.88	9.31	0	2.9	8.99
YCL048W-A	63.72	0	52.89	42.55	55.68	83.12	186.48	338.65	67.96	135.65	79.94	51.93	54.04	176.18	374.85	68.83	36.48	73.12	162.42	71.62	68.94	25.54	13.12	51.35		YCL048W-A	18.1	44.34	24.73	28.55	27.95	43.34	19.29	0	0	52.1	18.44	33.49	12.31	31.78	0	215.28	0	0	0	11.28	0	9.59	15.56
YCL048W	6.58	3.26	9.87	4.08	9.22	4.92	3.9	5.51	8.7	7.09	7.99	2.08	5.04	8.41	3.65	5.96	7.29	3.06	12.68	18.5	19.76	5.62	4.2	1.69		YCL048W	0	0	0	0.29	0.28	0	0	0	0	0	0	0	0	0	0	0	0	0	0	0	0	0	0.21
YCL049C	52.72	23.65	25	45.81	43.07	29.97	44.54	46.25	31.54	49.78	56.32	40.51	19.16	56.05	29.24	31.31	31.75	30.08	58.83	42.26	28.15	31.28	62.15	30.34		YCL049C	11.08	9.21	9.56	16.57	18.47	8.07	14.16	0	0	8.96	27.34	13.67	3.97	19.47	0	14.1	0	12.1	2.94	16.72	20.48	7.21	13.71
YCL050C	88.51	45.64	39.48	74.64	83.11	73.34	71.17	79.61	66.5	65.87	74.58	67.5	43.14	79.18	64.07	72.77	75.44	74.07	99.58	83.95	48.6	74.66	103.61	46.31		YCL050C	60.23	47.5	38.14	67.49	58.23	33.85	60.87	26.44	43.69	47.53	82.58	59.71	22.97	78.08	4.56	47.82	26.63	23.34	11.36	68.39	59.27	34.79	75.82
YCL051W	44.21	23.79	36.29	41.05	48.87	31.66	36.32	39.67	35.35	32.53	38.41	25.2	22.69	41.2	26.42	37.35	32.78	29.31	53.22	41.97	27.18	30.2	40.49	20.51		YCL051W	1.67	0.61	1.29	3.95	3.43	2.66	1.64	4.35	0	2.13	6.23	1.8	0	4.15	0	2.73	0	0	0.7	2.43	0	1.37	4.62
YCL052C	62.37	16.64	30.38	41.1	25.97	26.94	46.32	32.28	21.57	33.83	31.59	26.61	20.01	41.75	27.14	32.6	26.05	33	53.13	34.48	17.72	19.69	32.71	17.08		YCL052C	9.03	3.8	4.26	7.77	10.45	4.8	4.83	0	0	8.66	14.49	6.58	3.35	7.93	0	8.21	4.85	0	0.52	8.18	0	3.62	8.47
YCL054W-A	0	0	0	0	0	0	0	0	0	0	0	0	0	0	0	0	0	0	0	0	0	0	0	0		YCL054W-A	0	0	0	0	0	0	0	0	0	0	0	0	0	0	0	0	0	0	0	0	0	0	0
YCL054W	150.12	139.57	139.88	97.27	198.12	163.59	62.91	132.26	185.29	73.8	84.99	82.61	93.07	82.6	70.2	74.47	86.57	75.38	63.18	98.48	54.88	108.38	103.93	82.28		YCL054W	6.49	30.61	30.01	3.95	52.99	26.16	6.28	2.91	0	4.27	17.14	21.05	2.27	14.66	2.25	2.52	8.78	7.69	4.92	9.36	9.77	23.46	9.04
YCL055W	83.92	67.31	64.46	95.86	101.78	97.12	89.47	117.11	86.29	87.37	79.13	67.98	72.77	87.47	80.06	59.98	65.61	54.21	83	93.56	55.56	70.78	54.14	50.97		YCL055W	5.34	4.36	4.88	3.37	9.48	4.54	3.14	16.71	0	3.07	7.97	5.59	0.73	6.09	0	3.43	0	0	1.35	3.99	0	2.83	5.81
YCL056C	360.66	420.27	352.82	294.19	303.88	375.87	307.57	370.13	251.85	286.86	301.26	258.22	335.03	361.87	308.19	349.37	313.4	318.14	355.67	347.44	206.71	299.43	270.45	226.62		YCL056C	5.49	11.95	5	1.44	9.89	10.71	1.35	0	0	7.02	8.7	6.21	0	3.21	0	2.76	0	0	2.31	5.7	32.1	1.94	2.1
YCL057C-A	125.27	20.46	26.55	72.62	87.83	66.44	91.47	123.88	65.95	52.37	88.85	86.01	45.21	74.17	96.45	72.93	96.13	83.89	182.45	74.66	103.81	102.55	148.13	47.25		YCL057C-A	154.44	148.38	72.6	164.82	115.72	84.61	170.43	0	0	130.76	194.37	98.05	30.9	123.63	0	159.51	161.16	282.51	11.46	141.52	79.72	54.55	119.77
YCL057W	18.93	4.01	6.5	16.01	9.98	6.81	21.68	15.24	9.14	16.55	15.45	11.75	8.64	16.91	13.71	16.45	13.46	15.07	28.72	18.15	10.17	11.3	24.67	8.42		YCL057W	14.69	4.48	1.88	20.36	10.31	4.86	18.66	0	0	10.25	25.39	16.26	4.24	21.88	0.9	19.16	5.26	4.61	1.68	18.72	3.91	5.34	22.07
YCL058C	681.05	374	498.17	546.56	853.76	550.74	352.27	431.8	862.03	255.59	376.13	334.42	391.7	269.03	254.31	239.94	344.71	256.19	180.93	299.2	212.93	461.57	351.38	354.87		YCL058C	0	37.06	15.65	5.24	35.89	23.86	4.89	0	0	0	11.28	8.7	2.26	7.29	0	5.64	0	0	2.09	12.42	0	9.38	7.61
YCL058W-A	0	0	0	0	0	0	0	0	0	0	0	0	0	0	0	0	0	0	0	0	0	0	0	0		YCL058W-A	3.02	0	0	0	0	0	0	0	0	5.79	0	0	0	0	0	0	0	0	0	0	0	0	0
YCL059C	776.14	328.44	411.58	393.06	510.13	302.71	169.66	217.38	456.4	154.23	249.95	223.35	174.85	198.55	88.53	107.17	145.8	103.15	71.39	132.45	73.62	148.24	143.95	145.5		YCL059C	11.48	80.02	56.7	12.68	101.94	60.19	21.12	53.94	29.71	16.53	84.62	67.8	4.69	42.34	3.49	13.44	33.95	23.8	17.38	25.04	0	51.5	24.68
YCL061C	8.19	3.77	10.61	14.12	9.82	5.27	32.24	20.99	15.66	33.33	27.93	17.87	18.48	28.94	23.72	22.18	18.43	14.4	26.55	24.99	18.61	26.2	23.58	15.71		YCL061C	1.12	0.3	0.3	2.31	1.19	0.37	1.85	0	0	1.61	3.7	1.29	0.57	3.8	0.28	2.21	3.3	0	0	2.35	0	0.59	1.6
YCL063W	8.03	9.06	6.27	4.54	9.55	4.65	12.44	13.53	15.51	45.7	19.29	11.77	54.86	19.96	28.29	39.1	47.44	40.87	47.11	48.01	37.29	61.32	60.07	25.87		YCL063W	4.83	0.22	0.27	7.93	1.24	0.21	6.81	0	0	5.41	4.1	2.61	1.64	2.12	0	0.3	0	0	0	5.77	0	0.14	7.38
YCL064C	173.37	70.4	90.39	39.27	79.41	80.08	23.56	47.39	49.1	50.12	22.5	24.94	157.5	24.23	51.17	152.29	161.43	164.98	105.18	109.7	67.59	133	291.99	76.66		YCL064C	68.86	99.97	105.81	60.1	89.73	64.72	87.31	15.3	75.82	50.61	9.62	14.61	2.66	12.01	5.93	3.87	28.88	40.5	17.87	55.38	17.14	76.41	130.17
YCL065W	0	0	20.23	0	8.55	0	0	0	9	7.98	0	0	0	0	0	2.8	0	0	4.3	0	0	0	0	0		YCL065W	0	0	3.47	0	0	0	0	0	0	0	0	0	0	0	0	0	0	0	0	0	0	1.79	0
YCL066W	8.47	0	1.28	3.7	4.04	6.47	2.77	4.99	3.94	3.03	3.31	2.64	1.96	4.12	3.43	4.99	2.64	2.78	7.57	2.4	5.83	1.85	2.85	0.62		YCL066W	0	1.43	0.27	0.52	2.03	0	0	0	0	0	0.89	0.4	0	0.58	0	0.25	0	0	0.83	0	0	0.46	0.38
YCL067C	137.74	124.78	131.37	165.13	131.96	142.52	156.86	152.39	116.86	165.04	109.75	113.05	132.64	124.19	127.81	89.39	106.26	100.15	97.99	104.37	88.2	117.95	79.02	95.71		YCL067C	3.98	5.42	6.39	3.34	10.07	3.97	4.39	0	0	0	6.76	4.45	0.68	3.49	0	4.13	9.77	10.31	0.96	2.51	0	5.45	6.31
YCL068C	0.79	0	0	0	0.86	0	0	0	0.59	0.68	0	0	0	0	0	1.16	0	0	2.25	0.61	2.97	1.62	0.87	0		YCL068C	1.48	0.19	0.34	0	0	1.18	0	0	0	1.42	0.81	0	1.01	0.63	0	0.23	0	0	0	0.49	0	0.78	0
YCL069W	1.45	0	4.24	0.39	0.59	0.58	0	0	2.62	1.38	0	0	0.83	1.09	0.68	1.13	0	0.45	3.89	1.85	9.02	2.94	0.56	1.79		YCL069W	0	0.2	0.1	0	0	0	0.27	0	0	0	0.25	0.45	0	0	0	0.14	0	0	0	0.23	0	0.39	0.63
YCL073C	3.11	3.76	8.47	1.13	2.32	0	0.71	0	4.51	1.87	2.09	0.25	2.5	0.78	0.88	5.46	2.53	1.4	11.26	5.84	9.96	7.39	3.3	1.35		YCL073C	0.26	0.07	0	0.1	0	0.07	0.29	0	0	0.25	0	0	0	0	0	0	3.1	0	0	0.16	0	0	0.23
YCL076W	1.39	0	3.09	0	0	0.54	0.37	1.51	3.17	0.46	0.5	1.36	0.79	0.5	0.55	3.35	0	0.61	8.46	3.38	8.05	6.71	2.3	0.75		YCL076W	0	0	0	0	0	0	0	0	0	0	0	0	0	0	0	0	0	0	0	0	0	0	0
YCR001W	45.86	33.53	36.25	40.25	39.25	75.96	48.8	51.93	24.22	64.37	37.57	38.44	81.5	67.78	81.61	69.19	30.01	65.87	66.79	74.77	56.7	94.53	45.85	35.2		YCR001W	0	0	1.02	0	0	0	0	0	0	0	0	0	0	0	0	0	0	0	0	0	0	0	0
YCR002C	48.69	25.26	29.49	47.46	56.18	44.63	63.81	76.1	54.45	92.45	77.12	61.12	106.03	100.7	73.19	117.74	97.75	94.27	111.4	99.32	58.37	95.73	117.02	66.81		YCR002C	17.94	13.74	8.5	29.63	19.91	7.46	25.99	8.78	14.51	26.9	25.51	16.25	5.34	25.11	0	17.78	0	23.25	2.12	23.41	19.68	8.91	35.03
YCR003W	227.49	286.49	278.77	284.67	352.58	333.67	329.34	380.87	318.38	370.87	290.15	235.79	444.32	298.76	374.62	336.4	362.36	301.63	373.66	432.56	378.88	436.61	298.69	394.38		YCR003W	24.46	15.98	16.54	16.4	10.39	6.51	18	0	0	9.39	17.44	7.92	6.66	13.96	0	15.24	0	50.71	4.63	19.81	0	8.64	15.42
YCR004C	79.95	14.27	43.21	56.99	29.24	27.22	66.41	61.3	24.59	53.43	39.99	27.27	19.71	50.74	47.43	38.83	27.94	40.54	73.79	52.56	19.11	21.24	68.89	25.47		YCR004C	94.26	44.85	48.26	117.48	78.28	46.79	138.12	24.81	0	83.61	110.3	68.64	40.95	104.33	8.02	129.52	46.84	65.69	22.99	114.02	83.41	38.89	96.26
YCR005C	192.35	294.02	179.72	138.88	68.58	184.57	96.65	113.09	79.04	143.58	47.16	48.75	101.98	86.78	102.68	61.78	72.76	102.41	77.44	73.92	40.74	71.52	105.7	38.62		YCR005C	4.01	19.85	25.2	2.01	7.88	19.4	1.88	5.71	0	1.4	5.7	3.49	0	5.44	2.22	1.51	4.31	7.56	3.68	1.59	12.8	9.79	4.6
YCR006C	11.98	0	3.06	4.43	2.76	3.2	5.88	5.97	3.93	1.81	6.93	3.6	3.13	2.96	5.46	7.96	6.33	1.81	10.73	2.87	9.97	11.08	3.41	2.97		YCR006C	0	0	0.21	0	0	0	0	0	0	0	0	0	0	0	0	0	0	0	0	0	0	0.55	0
YCR007C	69.04	22.4	43.59	39.35	27.68	40.87	38.42	45.73	38.17	23.89	24.05	22.82	37.94	28.1	30.29	35.71	25.05	37.62	44.26	33.29	29.46	26.89	33.63	18.81		YCR007C	0	1.35	0.68	0	0.64	0	0	0	0	0	0.56	0.51	0	1.46	0	0.31	0	0	0	1.03	0	0.29	0
YCR008W	51.51	27.73	31.29	56.26	49.17	47.62	54.03	50.25	46.63	42.43	49.48	30.87	28.24	53.11	39.5	41.5	48.01	45.31	63.13	44.64	30.92	40.03	44.03	16.71		YCR008W	4.28	2.19	2.19	5.49	9.71	7.26	4.92	0	0	1.03	7.82	5.94	1.82	5.64	0	4.04	3.17	5.55	1.69	4.67	0	3.12	4.76
YCR009C	202.15	237.01	265.38	237.91	162.8	203.01	284.89	232.68	182.21	263.85	200.1	175.35	176.47	277	253.13	240.27	279.63	278.14	239.3	250.09	215.05	238.99	180.72	215.38		YCR009C	28.83	21.97	30.42	51.17	36.72	23.78	47.72	11.29	0	35.96	36.71	23.56	7.84	34.8	7.3	32.93	8.52	59.77	6.36	38.17	63.24	21.64	42.55
YCR010C	17.85	5.96	12.88	6.53	6.97	7.65	4.03	6.29	7.94	10.67	5.84	4.93	1.97	6.23	5.98	6.42	0.67	4.58	14.69	4.02	6.72	3.73	5.75	7.5		YCR010C	0	0.36	1.17	0	0.51	0	0.49	0	0	0	0.45	0.61	0	0.58	0	0	0	0	0.83	0	0	0.23	0
YCR011C	55.54	13.18	19.95	32.81	29.32	20.7	45.84	31.73	27.76	36.1	28.71	26.28	19.37	34.08	27.86	35.67	35.38	32.2	46.26	27.07	22.29	26.42	35.09	20.61		YCR011C	7.61	4.14	2.88	10.73	9.49	4.44	10.55	2.29	0	5.33	11.03	9.83	4.78	12.07	1.78	13.37	5.19	12.13	1.29	10.03	0	4.6	10.48
YCR012W	43.27	10.81	8.28	28.57	19.54	13.97	39.01	41.25	11.29	58.53	47.55	34.61	15.98	45.85	50.94	39.96	24.76	30.96	85.27	38	17.71	16.74	81.39	13.11		YCR012W	1037.18	146.91	97.61	1073.92	231.66	94.21	1001.63	194.05	174.15	815.52	494.07	545.12	569.86	534.17	67.08	509.59	700.49	1359.67	82.39	1026.68	1549.84	117.74	931.44
YCR013C	136.7	61.3	27.43	79.54	37.03	26.14	94.58	113.76	30.34	197.68	114.28	104.84	69.74	138.94	120.61	157.84	129.98	123.91	229.16	118.75	81.8	103.24	228.78	51.13		YCR013C	1041.91	81.91	48.71	1080.49	206.94	106.75	767.08	238	114.43	768.57	488.15	459.08	611.33	495.13	82.35	392.28	473.87	1020.37	82.34	585.31	1734.84	82.08	658.87
YCR014C	108.03	61.48	52.09	59.59	88.37	79.97	79.7	68.72	71.95	84.46	55.54	40.91	87.88	67.52	58.56	69.43	80.28	73.09	79.5	69.35	60.47	82.14	62.98	45.83		YCR014C	0	0	0.04	0	0	0	0	0	0	0	0	0	0	0	0	0	0	0	0	0	0	0	0
YCR015C	48.99	59.25	40.1	42.75	34.18	51.16	49.01	54.76	33.49	55.05	37.52	29.53	56.92	58.89	56.93	63.06	51.86	51.04	56.2	69.97	42.11	60.51	29.42	37.31		YCR015C	4	2.49	5.62	4.06	3.97	1.83	4.63	0	0	0	4.27	2.82	0.78	2.51	0	2.59	0	0	1.44	5.34	10.04	2.42	6.88
YCR016W	460.42	415.51	433.01	413.54	577.05	423.37	237.89	329.48	503.13	276.22	323.33	291.09	386.36	228.48	193.98	186.2	252.39	163.4	157.66	263.98	199.25	336.22	242.77	250.77		YCR016W	4.48	33.13	22.66	6.57	40.05	18.75	10.37	20.06	0	6.15	17.4	12.05	1.74	12.94	0	4.6	7.58	0	6.46	13.17	11.24	15.38	9.91
YCR017C	40.24	32.13	14.53	28.82	37.9	27.41	29.31	35.58	32.55	30.84	40	29.02	25.82	39.71	24.49	35.89	37.41	30.31	52.79	39.77	30.05	39.35	48.29	28.36		YCR017C	12.81	5.21	5.12	16.37	16.52	7.07	17.17	2.54	0	8.09	21.36	13.05	2.87	18.22	0.98	10.71	7.67	0	2.05	18.89	8.54	7.39	19.89
YCR018C-A	431.37	1307.4	742.12	761.77	1279.47	1073.17	946.18	1311.95	1209.33	1383.25	1635.12	1204.6	1799.58	1170.94	1232.08	1498.03	1292.86	1279.01	1814.73	1497.6	729.78	1674.26	1181.14	886.56		YCR018C-A	7.25	0	3.5	16.4	28.5	8.98	13.71	0	0	0	10.64	15.79	15.35	25.97	14.69	4.64	0	0	0	9.04	0	10.51	4.21
YCR018C	74.32	24.99	37.82	34.34	38.19	53.46	22.51	38.7	25.92	46.37	33.83	33.42	24.84	31.35	23.81	25.78	34.47	31.3	48.19	44.46	34.04	44.35	34.17	20.11		YCR018C	0	1.01	0.88	0.73	1.43	0	0	0	0	0	0.63	0	0	0	0	0	0	0	0	0	0	0.98	0
YCR019W	40.85	4.36	16.01	21.37	12.32	14.64	22.42	18.7	17.18	21.18	14.95	10.26	18.29	14.57	11.44	16.95	17.05	16.18	25.62	15.6	14.73	20.47	22.07	6.86		YCR019W	1.93	1.58	1.78	3.43	2.99	1.03	1.78	0	0	0.93	2.63	2.39	1.32	2.55	0	2.37	0	0	0	1.81	0	1.71	3.6
YCR020C-A	308.59	473.81	180.8	285.11	342.59	343.07	185.45	361.03	232.31	246.12	359.16	312.42	277.12	314.72	243.36	264.03	174.58	188.06	282.89	293.78	149.25	244.45	152.45	111.17		YCR020C-A	24.75	74.11	61.7	43.92	119.41	75.73	86.48	96.89	0	35.62	88.25	26.71	8.42	59.76	0	32.71	0	0	0	42.41	0	34.96	39.01
YCR020C	108.89	43.31	33.72	45.21	86.2	67.05	45.48	59.77	56.8	59.31	38.22	34.21	56.47	53.74	54.22	53.63	55.23	61.04	60.4	46.83	40.29	63.77	47.38	33.64		YCR020C	0.96	13.09	3.55	3.03	14.85	5.12	0	15.06	0	1.85	5.88	4.45	0	3.38	0	2.18	0	0	0	1.8	33.75	8.83	2.2
YCR020W-B	1475.79	2265.97	1996.89	1803	3962.32	2712.03	1693.5	2474.1	3392.48	1964.31	2473.26	1835.28	2465.57	1728.44	1631.99	1483.75	2725.9	1402.24	1220.72	2299.47	2699.24	2464.15	1980.87	2872.05		YCR020W-B	37.96	87.84	38.9	29.95	51.29	20.2	20.95	297.26	0	0	6.45	49.75	0	16.67	0	25.09	0	0	11.97	41.4	0	40.23	38.08
YCR021C	148.83	34.03	49.41	88.82	35.1	83.53	73.29	97.55	38.36	103.6	116.45	71.22	55.86	197.24	149.52	270.88	247.99	330.55	95.24	106.77	66.46	70.82	84.47	74.51		YCR021C	7.56	7.93	14.6	8.94	2.5	1.44	11.91	8.45	0	46.6	8.8	4.49	5.14	17.06	1.09	12.84	12.76	33.56	2.04	12.44	0	7.43	10.21
YCR022C	6.94	13.32	17.28	6.95	20.79	4.02	2.77	3.75	8.88	11.93	5.6	3.39	17.66	1.86	7.2	10	8.94	10.24	12.64	5.4	22.53	4.17	10.71	2.8		YCR022C	0	0	0.4	0	0	0	0	0	0	0	0	0	0	0	0	0	0	0	0	0	0	0	0
YCR023C	36.52	11.88	14.39	25.92	13.21	16.15	27.91	22.92	16.5	31.93	21.63	14.98	23.1	29.31	27.36	35.99	33.49	42.72	46.09	34.68	22.1	28.65	30.01	21.7		YCR023C	3.43	0.43	0.54	4.58	1.83	0.7	4.66	0	0	4.05	4.48	1.55	0.36	2.78	0	2.49	3.12	0	0.33	5.42	4.63	0.37	3.93
YCR024C-A	0	0	0	0	0	0	0	0	0	0	0	0	0	0	0	0	0	0	0	0	0	0	0	0		YCR024C-A	0	0	0	0	0	0	0	0	0	0	0	0	0	0	0	0	0	0	0	0	0	0	0
YCR024C-B	983.84	696.78	747.31	541.13	473.1	951.33	556.34	820.16	507.97	727.65	710.51	1015.35	1016.11	940.27	1229.72	1322.78	1265.73	2401.93	1179.14	817.3	1091.91	969.06	1094.04	672.85		YCR024C-B	6.19	0	0.85	0	0	0	0	0	0	0	0	0	0	0	0	4.67	0	0	0	0	0	4.37	3.55
YCR024C	16.43	3.04	9.2	10.63	8	7.11	13.43	9.63	12.66	13.81	9.79	7.74	7.39	10.59	10.1	14.11	14.28	11.55	22.48	11.29	10.71	13.8	26.64	10.84		YCR024C	1.01	1.1	1.47	3.46	0.78	1.26	1.74	0	0	1.29	2.75	1.04	0.46	0.89	0	1.78	0	0	0.43	2.52	0	0.6	3.67
YCR025C	9.56	0	3.97	6.7	5.37	7.62	10.49	6.46	9.18	5.87	8.99	3.51	12.16	15.35	6.38	11.19	4.1	8.62	16.53	6.2	2.59	2.87	5.9	1.93		YCR025C	0	1.11	0.28	0	0	0	0	0	0	0	0	0	0	0	0	0	0	0	0	0	0	0	1.17
YCR026C	31.2	11.5	14.92	25.6	20.19	14.61	29.88	24.01	23.1	24.4	23.62	18.79	16.93	26.04	20.8	19.05	16.5	16.53	31.08	19.29	15.66	20.11	25.12	10.66		YCR026C	5.32	5.67	4.33	5.2	9.19	3.73	5.79	6.66	0	4.9	9.68	6.82	2.31	7.84	0.86	5.54	10.06	4.41	1.61	7.95	0	3.23	6.1
YCR027C	76.41	31.59	27.32	33.44	22.89	29.65	37.53	31.13	35.1	37.54	18.96	14.94	19.94	20.76	28.94	28.78	43.41	27.75	40.66	23.17	24.16	28.27	37.75	14.21		YCR027C	7.01	7.09	11.63	15.01	13.92	3.2	8.84	0	0	5.77	9.52	7.41	1.36	13.19	0	3.03	0	0	3.79	12.48	0	5.31	6.89
YCR028C-A	391.5	455.96	527.17	399.21	335.88	461.67	312.47	471.66	279.21	384.65	423.6	386.4	384.48	517.58	563.71	420.68	391.36	534.09	492.53	495.44	401.27	378.92	408.68	394.59		YCR028C-A	210.69	146.2	91.71	184.13	169.04	59.36	179.32	64.7	0	75.32	242.72	114.65	53.4	150.53	0	99.84	73.29	128.47	23.45	194.35	36.25	80.25	191.82
YCR028C	28.36	11.61	12.55	15.91	17.27	14.03	10.11	20.43	16.77	11.33	21.14	9.43	8.66	12.75	10.65	14.57	13.96	11.65	25.88	17.06	11.04	14.09	17.74	6.09		YCR028C	3.87	3.16	3.34	3.3	14.18	7.89	9.01	15.14	0	3.71	12.91	7.15	1.31	5.09	3.26	3.65	0	6.68	2.85	4.62	5.65	4.89	7.02
YCR030C	16.27	4.03	6.27	14.97	9.75	5.54	19.93	16.11	9.76	16.6	15.8	12.11	10.32	12.8	10.27	14.06	10.45	7.84	28.73	14.15	12.26	12.62	25.53	7.95		YCR030C	12.16	3.8	4.52	13.97	5.52	5.14	11.45	2.8	0	5.83	12.75	7.39	2.43	14.29	0.72	11.35	4.23	3.71	0.9	12.81	6.28	4.11	13.33
YCR031C	817.52	524.57	326.85	561.63	597.5	468.49	642.9	638.73	516.89	565.76	783.44	712.33	478.91	636.08	611.57	613.96	646.93	598.61	594.96	617.98	333.38	551.75	1175.69	441.66		YCR031C	1279.08	577.53	430.42	1358.61	941.59	665.35	1325.63	1153.9	363.71	1008.6	1599.29	988.23	448.68	1054.76	101.35	951.34	972.96	1356.79	230.54	1324.71	806.34	398.72	1191
YCR032W	18.44	6.79	12.14	16.13	11.07	12	18.15	15.03	11.07	15.91	12.4	10.53	13.15	17.16	13.68	17.97	17.6	17.52	21.15	15.88	13.48	17.29	14.74	10.43		YCR032W	1.16	0.45	0.44	1.19	1.37	0.29	1.16	0	0	0.66	1.72	0.78	0.65	1.14	0	1.22	1.62	0	0.26	1.79	6.01	0.77	1.49
YCR033W	23.57	7.26	8.7	13.76	19.62	10.04	20.85	18.32	17.57	25.3	16.98	13.94	15.92	12.77	14.07	21.22	19.12	14.98	33.85	19.17	12.91	17.67	37.29	11.49		YCR033W	2.6	1.96	1.69	3.33	4.88	1.32	2.92	1.94	0	1.9	3.37	2.03	0.51	2.39	0.75	1.87	2.93	0	0.31	4.02	2.18	2.06	3.13
YCR034W	20.99	18.41	3.98	14.41	13.47	15.29	13.64	27.87	15.86	19.44	25.79	28.14	16.78	34.01	34.5	26.77	22.14	27.91	49.12	33.9	12.33	31	28.88	14.49		YCR034W	66.93	35.6	28.34	76.98	65.08	32.08	85.32	16	0	35.3	104.8	56.72	10.43	76.71	1.03	32.6	24.17	52.96	7.09	79.91	26.9	35.19	79.07
YCR035C	254.35	80.87	92.98	127.03	120.84	131.52	102.53	93.59	141.82	100.21	82.88	71.35	98.06	78.09	74.99	78.26	83.84	87.43	79.52	78.9	48.37	105.65	101.22	76.6		YCR035C	8.32	19.55	13.16	11.74	22.99	11.65	13.85	6.86	0	5.04	19.93	11.75	3.57	8.84	0.89	6.61	5.18	0	1.1	12.55	0	11.75	10.04
YCR036W	115.78	65.39	75.41	119.58	84.11	109.55	134.2	120.03	91.24	119.33	106.86	79.59	95.25	117.83	123.7	77.92	89.4	116.87	116.71	95.89	78.5	92.55	88.44	91.52		YCR036W	10.75	5.27	5.73	12.3	17.02	8.87	13.45	0	0	11.35	16.8	9.95	4.39	13.22	0	11.98	0	0	3.39	11.39	0	2.47	12.02
YCR037C	15.46	4.54	8.5	8.76	8.26	7.25	11.55	9.37	10.33	9.48	7.2	5.01	6.68	8.01	5.9	13.4	10.99	12.01	17.49	11.95	7.88	10.65	15.2	6.19		YCR037C	1.51	1.37	0.8	2.12	6.52	1.17	2.1	0	13.02	1.29	1.15	2.33	0	2.95	0	1.33	0	0	0.44	1.36	0	1.6	2.31
YCR038C	11.35	10.12	11.18	9.04	12.65	8.4	15.66	12.98	16.17	17.04	12.75	9	16.64	16.45	14.16	19.96	16.6	15.87	28.88	19.54	13.57	27.62	20.5	12.98		YCR038C	0	1.02	0.34	1.18	1.16	0.4	1.47	0	0	0	1.11	0	0	1.1	0	0.59	0	0	0	1.87	0	0	0.9
YCR038W-A	137.68	0	0	0	0	0	0	0	0	0	0	27.39	0	0	0	0	0	96.87	0	0	0	0	0	0		YCR038W-A	0	0	82.8	0	0	0	0	0	0	0	206.75	0	0	0	0	117.04	0	0	0	195.9	0	0	143.24
YCR039C	137.74	124.78	131.37	165.13	131.96	142.52	156.86	152.39	116.86	165.04	109.75	113.05	132.64	124.19	127.81	89.39	106.26	100.15	97.99	104.37	88.2	117.95	79.02	95.71		YCR039C	3.98	5.42	6.39	3.34	10.07	3.97	4.39	0	0	0	6.76	4.45	0.68	3.49	0	4.13	9.77	10.31	0.96	2.51	0	5.45	6.31
YCR040W	8.47	0	1.28	3.7	4.04	6.47	2.77	4.99	3.94	3.03	3.31	2.64	1.96	4.12	3.43	4.99	2.64	2.78	7.57	2.4	5.83	1.85	2.85	0.62		YCR040W	0	1.43	0.27	0.52	2.03	0	0	0	0	0	0.89	0.4	0	0.58	0	0.25	0	0	0.83	0	0	0.46	0.38
YCR041W	138	116.11	49.65	169.67	227.02	181.93	197.66	192.09	220.85	162.61	176.86	195.96	253.34	174	140.18	227.68	295.24	241.72	210.68	268.69	191.84	368.14	326.81	219.36		YCR041W	3.22	0	0	0	0	1.71	0	0	0	6.18	4.38	5.96	4.38	0	0	6.08	0	0	0	2.01	0	0	1.85
YCR042C	30.4	10.63	14	24.76	18.48	20.32	27.83	21.16	21.37	26.53	19.49	15.33	24.66	22.7	18.89	27.78	30.16	29.26	31.03	26.64	21.38	31.33	38.24	20.49		YCR042C	3.65	2.74	2.34	3.38	3.97	2.8	2.6	3.36	0	1.24	4.37	4.7	0.44	3.58	0.43	3.12	3.81	0	0.14	4.68	9.41	2.8	6.39
YCR043C	324.53	126.15	181.85	176.67	168.19	157.18	130.06	140.61	181.08	176.24	166.39	120.51	167.24	105.52	146.21	116.35	134.05	164.31	138.61	122.17	121.48	138.3	214.78	123.58		YCR043C	30.34	20.33	31.24	57.07	61.25	29.81	41.2	36.55	0	22.39	30.12	27.34	6.35	26.64	0	16.74	0	48.38	2.94	59.62	0	19.78	44.14
YCR044C	118.41	40.01	71.13	122.04	75.02	103.89	101.67	96.69	65.95	89.89	86.55	68.8	64.33	101.63	76.43	61.29	78.56	70.43	90.45	84.1	58.26	68.92	66.51	69.05		YCR044C	9.37	5.91	6.47	8.56	9.52	4.46	11.62	0	0	3.79	14.74	10.95	2.69	16.03	0	9.32	0	0	1.87	11.68	17.32	4.88	11.6
YCR045C	5.55	3.05	6.15	3.38	2.32	1.6	4.04	4.01	2.84	5.21	3.36	2.17	3	2.77	4.54	8.3	3.41	4.29	11.05	6.34	7.73	4.79	5.88	1.07		YCR045C	0.34	0	0.23	0.27	0	0.18	0.5	0	0	0	0.46	0.1	0	0	0	0.26	0	0	0	1.26	0	0.72	1.16
YCR045W-A	0	0	9.2	3.65	2.99	2.01	9.92	0.57	1.72	0.4	2.27	2.98	0.23	1.67	3.37	1.08	0	0	4.26	5.51	0	3.88	0.03	1.76		YCR045W-A	0	0	0	0	0	0	0	0	0	0	0	0	0	0	0	0	0	0	0	0	0	0	0
YCR046C	20.36	0	8.11	11.1	19.52	6.14	16.25	5.28	7.64	11.2	13.14	3.98	11.05	9.59	9.18	9.38	9.79	8.01	35	14.37	5.29	5.88	13.08	5.25		YCR046C	41.64	25.7	19.34	49.28	22.51	19.21	39.83	0	0	31.97	30.17	14.13	5.67	19.5	2.81	20.97	0	86.34	7.01	34.6	0	10.79	25.46
YCR047C	104.71	40.19	39.87	38.08	103.76	52.07	37.29	58.33	79.72	56.58	56.73	41.75	38.26	23.71	30.34	24.36	27.67	27.73	45.19	51.81	33.99	49.39	89.04	33.75		YCR047C	8.92	37.61	29.08	9.03	88.49	31.78	23.23	0	0	16.41	37.76	25.12	2.8	15.07	0	6.22	8.49	14.23	9.41	18.95	12.05	28.72	10.62
YCR047W-A	0	0	5.78	0	0	0	0	0	0	0	0	0	0	0	0	0	0	0	41.7	0	0	0	0	0		YCR047W-A	0	39.06	17.76	4.1	0	0	0	0	0	17.16	0	26.91	0	0	0	0	185.72	0	23.51	6.97	0	20.62	0
YCR048W	6.45	1.19	2.06	4.4	3.98	2.34	4.52	4.9	3.16	5.34	6.71	3.59	2.16	4.46	3.33	4.47	2.79	2.55	11.71	3.92	5.34	2.83	10.48	3.5		YCR048W	8.49	1.41	1.39	7.2	9.54	4.78	9.86	0	0	3.63	15.56	6.29	1.17	9.53	0	3.61	0	16.43	1.41	11.39	0	3.42	9.52
YCR049C	5.9	0	0	2.09	12.24	4.15	4.49	8.79	6.34	5.24	5.2	5.31	3.47	4.52	3.68	3	3.51	2.22	13.27	5.58	0	0	15.49	1.65		YCR049C	4.48	5.33	6.65	3.62	0.13	0	0	0	0	0.82	0	0.91	0	0	10.58	1.58	0	0	0	5.55	0	4.96	0
YCR050C	3.8	0	0	3.8	2.94	2.63	0	1.93	5.56	6.17	0	0	14.77	0	2.28	3.06	2	6.96	14.13	8.1	0.34	2.32	0	0		YCR050C	32.49	9.81	1.96	8.8	9.43	16.68	23.93	0	0	4.48	8.85	6.13	9.38	6.59	0	2.02	0	0	3.75	9.03	0	1.83	18.26
YCR051W	77.61	24.83	28.63	57.88	75.08	50	22.37	55.93	65.3	23.83	50.42	43.75	26.51	32.3	22.38	22.9	12.96	19.79	41.61	30.75	15.16	31.11	68.56	20.85		YCR051W	16.53	32.01	26.35	18.84	72.33	43.02	25.68	14.39	0	8.81	67.38	33.14	10	32.26	3.72	13.87	10.86	38.09	10.43	24.61	0	27.58	20.53
YCR052W	29.92	15.52	12.08	23.49	31.49	16.64	29.53	32.12	27.08	30.99	24.57	22.74	24.35	22.07	21.95	20.82	21.88	18.56	36.22	26.64	14.87	23.34	46.94	14.99		YCR052W	12.06	10.32	7.53	15.49	16.23	6.6	15.46	0	0	5.95	21.3	11.26	4.22	19.66	1.4	9.76	8.15	0	2.61	14.17	6.05	8.88	13.23
YCR053W	91.28	52.02	36.24	69.98	67.09	57.61	73.3	66.12	61.66	54.18	74.48	61.66	55.55	78.35	48.57	68.17	59.15	64.17	80.32	73.81	46.02	74.22	98.56	50.65		YCR053W	83.71	57.1	50.34	90.33	85.43	62.13	96.98	40.18	16.6	54.78	127.66	81.79	20.51	111.52	8.44	64.8	53.11	53.2	16.19	93.13	84.44	45.2	100.57
YCR054C	47.51	14.33	19.72	25.7	21.09	29.12	18.82	26.23	17.37	20.34	12.95	8.3	19.57	17.98	17.92	22.11	21.27	26.15	21.5	21.65	10.65	19.99	20.54	6.84		YCR054C	2.89	6.3	3.91	2.05	7.14	4.77	3.62	0	0	1.11	5.3	4.19	0	3.55	0	2.07	0	0	0.73	4.32	10.15	3.88	4.14
YCR057C	29.63	18.14	14.71	17.04	27.87	20.38	11.71	23.52	27.05	15.57	20.22	14.73	11.36	11.49	12.44	14.32	12.34	10.72	17.42	16.24	12.57	17.05	36.97	8.57		YCR057C	9.06	19.27	17.47	7.28	41.45	22.14	11.6	15.77	21.71	5.15	27.12	19.35	2.51	12.52	2.72	3.55	3.97	6.96	5.08	11.81	2.94	16.3	10.77
YCR059C	17.53	6.73	7.28	16.16	21.66	8.89	12.24	16.11	11.59	15.07	18.85	14.14	5.95	12.2	9.62	13.25	9.79	4.31	16.6	15	6.64	9.49	25.98	4.24		YCR059C	9.71	11.79	6.02	11.19	25.95	11.13	18.13	0	0	5.73	27.9	8.06	0	19.67	0	6.77	0	15.49	0	12.1	0	8.71	5.99
YCR060W	373.51	340.69	239.43	410.46	387.76	341.96	394.05	461.7	354.96	312.48	365.86	343.56	291.7	399.75	342.23	282.27	285.81	354.04	304.32	329.95	276.07	360.17	212.39	271.18		YCR060W	6.3	32.6	20.66	14.91	43.79	28.51	23.18	0	0	0	51.37	23.32	4.29	19.37	12.76	19.04	0	0	7.95	31.42	0	8.9	7.23
YCR061W	7.61	1.15	5.45	8.61	6.04	3.46	13.34	9.36	5.99	8.65	14.77	8.9	2.03	7.51	6.73	4.73	4.1	2.94	14.68	5.42	6.14	4.31	5.16	2.89		YCR061W	15.52	2.77	3.86	17.66	8.84	9.21	21.15	3.98	0	9.76	39.05	22.51	4.85	35.52	1.03	35.93	3.01	0	4.17	16.8	0	4.85	15.31
YCR063W	15.66	14.14	0	7.13	8.18	4.73	9.26	17.3	12.25	10.08	12.1	13.76	7.71	4.83	4.39	7.69	14.76	8.62	22.47	14.3	13.8	6.42	30.3	1.48		YCR063W	1.57	12.97	9.59	2.48	16.97	5.85	6.93	0	0	3.01	13.57	9.2	0	5.51	0	2.96	0	0	3.96	7.05	27.55	4.38	5.4
YCR064C	0	0	3.97	4.15	14.44	2.18	6.11	4.69	6.53	8.06	7.44	4.36	2.15	2.68	4.23	7.24	5.49	3.71	9.15	7.48	15.71	8.91	12.35	3.85		YCR064C	0	0.92	0.92	0	0	0	0	0	0	0	4.52	0	0	0	0	0	0	0	0	2.28	0	1.51	0
YCR065W	17.27	2.6	9	10.18	13.19	5.79	20.41	19.95	11.41	24.12	21.3	18.38	12.64	17.22	24.91	14.63	10.76	7.66	25.16	19.15	12.09	17.51	28.02	6.55		YCR065W	14.72	0	0.16	12.29	0.45	0	9.77	0	14.93	11.63	16.46	7.56	3.53	19	0	7.63	3.41	5.98	0.36	16	0	0.1	11.91
YCR066W	20.83	12.3	15.29	22.31	16.8	17.53	23.97	21.21	18.11	24.79	22.61	12.73	16.64	21.86	19.13	20.33	20.29	21.67	29.17	18.7	17.33	25.52	25.72	16.78		YCR066W	2.73	1.86	1.63	2.15	1.84	0.73	1	0	0	0.65	3.48	1.16	0	2.4	0	1.16	0	0	0.43	1.49	0	1.81	2.35
YCR067C	6.76	1.95	1.68	3.72	2.78	1.76	4.65	5.3	3.96	4.65	6.01	4.05	3.73	3.25	4.16	6.2	3.34	3.38	12.73	5.7	6.22	6.3	10.12	2.04		YCR067C	5.76	0.55	0.9	6.7	4	2	4.99	0	0	2.77	6.76	4.93	1.76	7.08	0	4.83	0	5.97	1.09	7.8	2.53	1.83	8.17
YCR068W	8.36	0	1.23	4.91	8.35	2.69	9.93	9.64	7.76	8.03	7.59	4.72	3.78	7.35	5.84	4.55	4.47	2.31	16.77	6.36	10.45	5.36	7.8	3.89		YCR068W	4.43	1.03	1.43	3.25	4.89	3.03	4.66	4.96	0	3.04	7.09	5.08	2.58	3.61	0	5.5	3.74	0	0.4	3.94	0	2.68	2.54
YCR069W	19.38	5.13	6.66	20.62	17.02	11.24	33.88	27.09	12.26	36.78	24.8	19.94	18.14	28.61	24.39	18.53	16.65	15.12	54.27	26.7	9.4	14.47	50.77	12.39		YCR069W	27.34	2.79	2.8	40.44	4.84	5.76	30.59	8.92	14.74	21.86	21.66	6.67	6.97	32.5	0	20	20.21	23.62	1.44	33.36	19.99	2.82	27.75
YCR071C	170.63	96.44	104.26	155.19	133.28	124.41	171.28	141.44	137.54	179.98	129.45	125.91	154.48	124.35	112.4	143.22	136.63	129.04	155.51	137.92	126.84	146	208.15	158.58		YCR071C	8.92	17.48	16.08	29.55	9.64	8.54	22.31	0	0	3.42	19.39	6.6	2.43	15.66	0	15.49	0	0	0	14.45	62.62	7.56	15.34
YCR072C	27.98	17.3	11.85	16.25	37.97	28.2	11.84	29.23	33.32	12.36	20.8	20.2	15.29	12.86	14.59	16.36	12.26	9.85	19.97	19.09	13.82	22.58	25.51	10.29		YCR072C	6.08	40.6	25.31	5.55	41.51	38.66	12.01	0	16.56	7.37	23.69	17.76	2.61	13.21	1.3	2.66	7.57	0	4.44	16.15	0	18.2	9.17
YCR073C	6.67	1.54	4.87	3.31	5.06	4.1	2.93	5.19	5.98	7.54	4.59	3.07	4.19	3.36	4.79	8.02	7.68	6.04	9.96	7.82	6.06	8.66	9.06	3.66		YCR073C	0.8	0.12	0.26	0.27	0.53	0.12	0.33	0	0	0.22	0.7	0.18	0	0.5	0.23	0.13	0	0	0	0.43	0	0.32	0.26
YCR073W-A	34.84	7.79	3.37	15.99	12.67	8.24	17.82	20.11	11.54	15.95	16.73	12.24	5.16	11.58	9.63	14.37	6.97	6.21	23.89	11.93	9.51	10.57	21.72	7.09		YCR073W-A	15.56	17.57	12.36	22.73	24.03	13.8	16.11	18.05	0	8.85	32.49	19.37	4.71	22.27	2.33	16.76	0	23.9	4.36	19.04	0	10.99	16.85
YCR075C	7.37	0	1.44	5.56	0.65	3.52	7.27	7.5	2.59	8.95	7.46	3.82	0.74	8.36	8.75	11.24	3.72	7.68	22.43	5.85	4.69	7.3	6.43	2.8		YCR075C	10.35	1.21	1.41	14.58	1.14	2.75	11.96	0	0	5.67	7.53	3.65	3.02	8.44	0	6.98	8.74	0	0	12.9	0	1.04	9.32
YCR075W-A	317.12	248.43	107.44	259.32	164.8	135.07	196.29	188.88	77.3	254.35	201.82	145.56	175.65	166.23	161.25	246.99	133.38	140.04	212.09	147.71	126.03	202.32	175.85	83.44		YCR075W-A	44.12	30.02	12.05	26.09	59.6	0	16.23	0	0	42.32	22.47	13.6	0	29.05	0	37.48	0	0	0	48.11	0	11.69	31.61
YCR076C	58.99	77.23	47.06	60.46	49.31	57.26	104.38	94.9	60.08	94.79	69.82	57.24	66.71	98.85	113.11	78.37	81.67	80.36	102.9	84.92	64.31	73.67	63.25	66.32		YCR076C	6.23	7.21	4.9	15.37	8.42	4.98	7.45	12.2	0	7.48	10.06	5.05	4.24	10.95	0	7.65	9.22	0	1.97	8.25	0	3.85	7.15
YCR077C	42.53	20.41	26.47	35.75	39.47	36.92	42.52	44.6	33.52	32.7	37.16	32.89	29.01	47.74	33.87	37.45	33.54	37.36	54.87	39.93	26.01	48.08	46.39	33.34		YCR077C	17.33	12.87	10.76	21.75	20.98	15.72	21.15	3.08	0	7.56	25.68	16.22	4.82	23.69	1.2	13.31	13.98	16.33	2.48	21.11	0	11.69	20.55
YCR079W	51.56	10.33	17.12	23.89	14.1	17.94	32.74	17.69	13.2	26.21	21.21	13.59	15.59	23.27	20.08	16.95	14.63	16.02	34.77	16.51	11.16	18.87	20.77	11.56		YCR079W	2.67	1.25	1.83	5.12	2.95	0.81	1.69	0	0	4.4	2.85	0.82	1.56	2.01	0	2.74	0	0	0	1.67	0	1.35	2.19
YCR081C-A	14.94	0	16.17	9.32	19.44	10.38	7.07	17.58	19.35	13.99	0	1.84	14.76	6.8	0.91	10.37	7.34	12.75	23.4	2.36	6.48	0.48	3.24	1.73		YCR081C-A	0	9.04	0.79	0	10.5	4.28	0	0	0	0	10.23	0	0	0	0	0	0	0	11.75	8	0	0	0
YCR081W	8.95	2.86	2.7	4.17	3.68	3.95	5.22	3.89	3.96	5.39	2.73	2.53	3.1	2.78	2.93	7.12	5.24	4.01	9.27	4.61	4.62	5.66	5.25	3.18		YCR081W	1.27	1.17	0.99	1.67	2.33	0.4	1.09	0	0	1.83	1.82	1.69	0.58	1.3	0	1.56	1.25	0	0.27	1.95	1.85	1.01	2.73
YCR082W	575.37	796.54	872.38	640.33	978.89	823.37	477.51	726.8	615.05	368.04	594.08	573.19	418.28	610.01	430.04	421.1	430.44	362.25	388.58	466.91	311.97	369.4	379.44	401.75		YCR082W	11.48	30.01	21.96	18.11	54.96	17.11	25.34	35.96	0	8.81	45.23	26.2	3.12	30.24	0	23.41	27.16	0	8.69	28.62	0	24.33	23.69
YCR083W	161.58	94.61	100.02	168.99	172.29	192.91	151.91	192.42	146.03	96.87	188.48	187.47	72.01	211.03	133.22	87.76	91.72	91.58	101.71	96.6	65.18	85.61	89.63	86.07		YCR083W	21	52.09	41.76	42.34	97.28	40.98	34.34	73.09	0	53.74	106.2	62.61	22.22	67.62	0	81.07	27.6	0	20.61	39.26	0	41.21	34.78
YCR084C	41.98	11.01	13.85	26.54	34.96	16.55	30.39	33.26	33.37	32.41	33.23	27.92	20.57	23.72	23.51	25.82	22.84	16.16	52.32	29.76	16.64	25.08	62.48	16.39		YCR084C	33.11	15.73	12.45	36.98	33.45	17.5	45.61	13.92	11.5	20.47	49.5	27.13	5.44	37.07	2.7	19.05	15.77	18.43	5.33	46.8	31.2	14.75	39.23
YCR085W	9.81	12.55	0	6.55	9.79	5.69	5.22	5.3	11.16	9.63	12.3	0	5.54	13.99	10.66	11.77	8.42	13.93	16.66	8.48	0	11.79	12.11	2.63		YCR085W	0	0	0	0	0	0	2.05	0	0	0	0	0.86	0	0	0	0	0	0	0	0	0	0	0
YCR086W	58.25	10.4	15.74	20.63	16.23	16.89	14.06	13.91	11.56	21.96	15.3	11.92	14.94	10.87	11.65	15.61	20.94	18.21	26.64	12.65	19.05	11.4	15.89	7.64		YCR086W	10.39	3.14	5.36	14.57	6.24	1.84	13.59	0	0	4.43	9.41	3.92	1.57	5.07	0	4.36	13.65	0	1.46	9.35	0	2.85	4.63
YCR087C-A	0	0	0	0	0	0	0	0	0	0	0	0	0	0	0	0	0	0	0	0	0	0	0	0		YCR087C-A	0	0	0	0	0	0	0	77.12	0	0	0	0	0	0	6.65	0	0	0	0	0	0	0	0
YCR087W	970.14	558.29	737.59	694.83	643.98	535.56	264.06	390.44	592.48	200.21	383.26	376.67	211.47	265.13	170.19	193.35	179.79	205.41	148.98	225.5	72.62	186.41	188.51	166.14		YCR087W	14.98	129.76	72.69	29.21	153.5	63.06	33.06	0	0	21.1	96.6	56.69	7.41	52.9	0	12.86	32.21	0	10.31	27.16	23.9	62.53	31.23
YCR088W	22.77	7.39	5.32	21.46	21.37	9.3	36.21	26.52	18.19	34.02	21.38	18.03	15.5	26.43	25.01	26.09	25.33	17.14	44.13	25.45	17	19.66	65.54	14.73		YCR088W	54.1	17.7	14.86	59.92	18.14	16.58	64.13	12.84	0	31.99	37.67	27.64	19.7	41.98	2.77	39.62	32.32	22.66	3.1	65.21	23.98	9.46	58.58
YCR089W	7.22	3.36	2.18	2.06	3.85	1.62	3.01	1.83	4.29	3.76	3	1.93	3.17	1.81	2.14	5.2	3.29	2.98	11.67	5.22	7.93	4.74	4.66	2.73		YCR089W	0	0	0.04	0	0	0.1	0.07	0	0	0	0.06	0.17	0	0	0	0	0	0	0	0.06	0	0.13	0
YCR090C	120.87	127.8	81.7	129.34	97.57	132.18	110.34	143.17	70.4	107.38	144.76	102.63	130.14	172.74	133.96	144.37	104.42	143.8	193.44	159.19	93.97	160.13	106.38	107.31		YCR090C	16.04	12.09	11.46	24.33	13.33	9.19	9.07	0	0	11.84	18.43	17.5	3.36	16.25	0	12.11	29.18	0	4.67	21.52	0	10.46	27.58
YCR091W	14.32	2.97	4.71	10.13	6.18	5.83	15.75	11.43	7.92	18.76	9.99	6.43	4.81	9.52	11.63	10.31	9.53	9.56	20.48	12.58	9.21	9.93	18.8	7.28		YCR091W	1.32	0.24	0.39	2.08	0.34	0.47	0.32	0	0	2.11	1.05	0.7	0.3	2.7	0	3.15	2.6	0	0.28	0.96	0	0.23	1.89
YCR092C	26.5	8.17	10.01	16.62	17.13	14.23	18.96	18.3	17.32	19.59	16.87	11.01	13.98	22.96	16.72	19.59	20.24	19.24	27.3	21.98	13.43	19.61	23.86	11.29		YCR092C	2.42	0.99	1.01	2.26	2.8	1.85	1.89	0	0	0.58	2.46	1.54	0.21	3.18	0	2.22	0	0	0	3.48	0	1.33	2.51
YCR093W	10.46	6.03	3.57	8.18	6.56	5.22	7.95	7.37	6.91	7.51	8.4	6.55	4.21	9.03	6.77	11.4	5.18	8.13	17.52	10.42	6.35	7.46	11.69	5.93		YCR093W	8.45	7.17	5.29	8.61	12.73	7.01	8.91	3.31	0	5.14	15.69	11.77	2.01	11.94	1.28	7.61	5	4.38	1.69	10.45	7.42	5.67	11.11
YCR094W	29.56	9.95	8.61	16.21	18.64	14.13	20.9	22.14	18.14	17.07	22.03	21.81	17.15	21.09	15.84	19.42	18.26	17.34	29.83	23.13	11.22	21.2	25.94	10.45		YCR094W	5.74	7.22	4.53	11.5	11.94	7.52	8.13	0	0	3.39	9	5.72	2.4	10.86	0	5.84	5.23	0	1.11	9.09	0	5.31	9.63
YCR095C	146.87	135.48	142.7	156.7	152.21	175.74	153.8	179.99	144.98	141.51	129.47	129.15	151.6	158.1	149.09	120.93	141.75	129.15	142.19	155.62	99.77	165.64	109.33	122.94		YCR095C	2.43	3.96	4.9	3.44	3.74	7.74	1.43	0	12.55	1.86	5.27	3.59	0.66	4.26	0.98	4.58	0	0	1.84	4.84	0	2.23	3.89
YCR095W-A	72.78	0	0	58.33	54.51	84.39	174.28	78.67	0	35.76	78.27	213.53	0	77.9	64.77	52.41	62.5	47.73	0	188.78	78.74	0	44.95	0		YCR095W-A	0	0	0	0	0	0	0	0	0	0	0	0	0	0	0	0	0	0	0	0	0	0	0
YCR096C	92.92	257.39	268.63	171.41	160.58	195.79	210.47	169.99	156.63	198.57	132.46	129.06	146.96	172.43	223.79	134.41	135.13	223.52	176.37	145.77	188.4	170.04	116.16	110.35		YCR096C	0	0	0	5.25	1.59	0	0	0	0	20.58	0	0	0	0	0	0	10.78	0	1.58	8.19	0	0	1.34
YCR097W-A	0	0	0	0	0	0	0	0	0	0	0	0	0	0	0	2.98	6.66	0	0	0	8.65	8.91	4.61	0		YCR097W-A	0	0	0	0	0	0	4.55	0	0	0	0	0	0	0	0	0	0	0	0	0	0	0	0
YCR097W	508.04	1218.17	790.23	786.37	1071.63	885.21	953.17	1140.44	1078.28	954.54	1061.18	1009.95	1114.41	1157.45	1080	896.03	1027.92	942.79	1125.12	1041.13	1159.52	1004.14	723.72	1269.65		YCR097W	2.37	11.62	8.1	16.84	5.49	5.05	10.47	0	0	13.66	22.56	18.29	12.91	8.33	0	17.91	0	0	2.99	14.78	0	9.22	16.32
YCR098C	36.38	8.59	11.77	12.56	15.37	16.44	26.5	46.18	19.42	24.56	10.63	11.49	20.57	10.98	27.11	14.24	12.82	11.13	20.92	14.51	12.51	15.25	12.44	8.12		YCR098C	0.32	2.08	4.3	1	2.21	2.37	1.4	0	0	0.61	2.16	1.86	1.73	0.84	0	4.56	0	0	0.4	2.97	5.58	2.47	0.73
YCR099C	23.54	0	12.51	22.64	12.7	9	21.05	11.2	11.25	19.43	13.16	7.37	15.97	16.13	12.29	21.7	33.96	21.61	24	17.59	18.34	9.06	18.61	3.04		YCR099C	0	0	0	0	0	0	0	0	0	0	0	0	0	0	0	0	0	0	0	0	0	0	0
YCR100C	13.47	0	3.36	4.86	3.03	2.15	4.57	1.82	2.59	3.31	2.9	1.32	1.71	3.61	5.8	5.82	1.74	5.74	11.04	4.89	8.75	3.24	4.99	4.89		YCR100C	0	0	0	0	0	0	0	0	0	0	0	0	0	0	0	0	0	0	0	0	0	0	0
YCR101C	23.88	5.56	7.21	12.76	2.17	5.04	12.71	7.04	9.26	10.67	9.34	3.54	6.14	17.04	10.3	10.94	9.94	10.92	19.5	12.77	10.96	8.7	14.3	9.33		YCR101C	0	0.67	0.67	0	0.95	2.63	2.72	0	0	0	2.51	0.38	0	1.08	0	0	0	0	0	3.84	0	0.44	0.71
YCR102C	19.87	2.39	3.31	10.81	9.06	8.41	4.11	5.95	9.35	6.03	12.25	6.62	7.23	5.86	5.17	17.15	13.78	20.49	10.62	5.21	6.47	7.82	9.63	3.84		YCR102C	0	0.47	0	1.86	2.51	0	1.12	0	0	2.17	3.65	1.05	1.31	0.5	0	0.51	0	0	0	1.19	0	0.43	1.23
YCR102W-A	23.54	0	0	9.43	0	6.82	0	0	10.04	0	0	0	0	0	0	0	0	7.72	42.86	0	25.47	0	0	18.97		YCR102W-A	0	0	0	0	0	0	0	0	0	0	0	0	0	0	0	0	0	0	0	0	0	0	0
YCR104W	0	0	0	0	0	0	4.1	1.56	0	4.36	1.55	0	1.23	3.09	0	8.33	0	0	6.64	4.7	12.8	0	0	4.64		YCR104W	0	0	0	0	0	0	0.6	0	0	0	0	0	0	0	0	0	0	0	0	0	0	0	0
YCR105W	6.85	2.19	4.74	5.95	3.85	3.48	9.8	5.87	5.36	8.98	7.37	2.79	4.36	6.11	6.27	8.23	2.94	5.06	16.01	6.52	7.42	6.18	10.93	5.06		YCR105W	0.97	0	0.53	0.38	0	1.55	0.36	0	0	0	1.32	1.05	0	0	0	0	0	0	1.23	0	0	0.34	0
YCR106W	5.29	0.85	2.56	0.97	1.81	1.47	1.67	1.67	3.95	2.49	1.66	0.65	3.18	1.41	2.09	4.6	2.46	3.03	8.42	3.54	4.29	2.65	3.54	1.78		YCR106W	1.31	0.1	0.44	0.89	1.01	1.6	0.55	0	0	0	0.89	0.41	0.26	0.33	0	0.14	0	0	0.24	0.7	0	0.27	0.86
YCR107W	21.1	16.55	8.4	13.27	11.88	11.68	12.79	12.81	13.45	16.67	14.04	11.33	11.35	10.3	12.83	20.43	15.42	14.33	25.11	11.83	16.23	20.97	27.92	8.41		YCR107W	0.48	0	0	0	0	0	0	0	0	0	0	0	0	0	0	0	0	0	0	0	0	0	0
YCR108C	157.94	68.4	90.08	0	40.64	46.8	40.88	29.33	171.03	86.12	130.16	39.8	63.89	58.07	22.65	176.38	88.31	47.91	492.61	137.93	323.38	319.99	164.69	65.59		YCR108C	0	0	0	0	17.85	0	0	0	0	0	0	0	0	0	0	0	0	0	0	14.41	0	0	0
YDL001W	56.27	30.22	35.36	39.9	40.93	46.31	46.39	40.55	42.48	45.27	33.12	28.53	40.06	38.16	37.64	41.18	37.38	42.51	43.34	42.04	31.57	35.64	47.19	29.85		YDL001W	4.74	6.02	4.85	5.29	8.53	3.99	2.61	6.18	0	1.51	6.97	1.7	0.54	5.89	0	3.73	0	0	0.5	3.93	0	3.07	4.75
YDL002C	506.65	268.41	427.66	405.52	366.59	354.18	448.44	344.1	364.23	517.07	314.62	280.71	407.86	324.29	323.11	266.33	387.67	303.66	267.56	295.26	322.51	368.75	331.81	392.45		YDL002C	6.27	10.81	13.14	15.67	17.75	16.13	7.69	16.37	0	8.02	16.33	10.31	5.69	16.52	0	8.68	12.36	0	0	7.16	0	9.6	14.98
YDL003W	9.28	3.88	2.24	15.68	7.58	4.89	57.88	46.67	23.02	73.08	73.63	56.24	39.77	82.31	84.54	39.96	38.81	38.6	52.81	52.84	22.99	42.59	42.08	37.51		YDL003W	8.62	0.31	0.12	9.07	1.11	0.31	9.09	4.5	0	7.17	14.06	9.04	2.35	16.15	0.58	5.75	0	0	0	13.07	0	0.3	5.6
YDL004W	181.07	47.94	62.19	187.28	62.8	108.6	261.28	179.34	82.19	122.69	98.79	91.59	133.15	168.97	176.73	195.26	194.56	253.25	229.95	166.57	108.08	143.72	154.23	162.44		YDL004W	182.42	48	52.95	196.66	51.64	37.21	176.7	0	39.33	105.02	134.22	90.47	35.16	124.13	9.24	136.61	89.89	0	17.26	171.44	53.36	33.29	149
YDL005C	41.1	39	67.47	53.11	68.83	48.73	61.59	58.41	74.06	59.67	49.66	43.13	48.96	52.15	45.89	58.53	76.15	52.72	62.39	58.93	56.96	67.32	69.59	69.97		YDL005C	5.51	7.71	8.76	6.83	10.03	3.98	5.5	6.16	0	3.78	8.02	5.46	2.68	6.91	0.8	6.69	0	0	1.49	9.81	0	5	8.35
YDL006W	110.02	54.11	66.3	87.85	56.89	65.37	69.69	52.48	59.13	62.32	40.42	34.46	55.12	60.76	55.51	56.11	57.83	61.62	65.87	54.02	30.5	49.9	33.37	38.49		YDL006W	9.34	2.54	2.92	6.84	9.79	3.2	5.4	0	0	3.84	9.06	4.73	0.91	6.44	0	4.79	0	0	0	6.65	0	4.24	8.41
YDL007C-A	8.17	0	0	0	6.12	0	3.26	0	3.48	8.03	17.57	0	6.93	8.74	0	2.94	7.01	0	23.8	4.24	8.84	39.29	5.04	0		YDL007C-A	0	0	0	0	0	0	0	0	0	0	0	0	0	0	0	0	0	0	0	0	0	0	0
YDL007W	633.19	336.63	343.21	482.3	466.23	403.71	328.94	313.61	371.01	276.8	337.39	286.16	190.38	291.78	173.19	194.36	242.7	198.14	217.24	198.23	135.19	270.44	251.42	233.61		YDL007W	20.52	30.36	23.22	23.82	54.1	32.97	25.35	0	0	11.15	52.86	40.23	5.27	44.53	1.57	26.46	9.16	16.05	8.79	22.92	0	27.62	31.29
YDL008W	109.29	78.05	70.32	114.74	95.18	96.27	114.96	137.37	66.5	133.19	100.22	67.94	113.54	114.25	127.16	110.42	119.32	103.89	155.48	130.97	113.66	116.13	84.76	98.31		YDL008W	10.11	12.58	7.69	17.08	11.15	6.15	10.62	0	0	2.77	20.59	9.35	3.93	7.61	8.77	6	17.08	0	7.29	17.09	25.34	6.12	19.86
YDL009C	145.91	124.47	215.3	149.41	160.89	129.24	163.37	151.15	152.16	177.21	148.19	160.52	103.13	188.7	110.6	113.83	111.38	127.57	149.06	140.87	105.24	121.83	155.18	114.3		YDL009C	6.91	0	4.25	5.45	13.33	7.35	7.62	0	0	6.63	9.38	3.2	0	6.06	0	5.22	0	0	0	10.76	0	1.22	3.96
YDL010W	189.93	109.57	155.69	145.62	147.39	122.55	187.75	130.58	186.49	178.16	167.33	130.2	89.92	171.42	116.57	80.75	113.8	109.64	111.21	114.75	100.23	115.22	150.45	105.82		YDL010W	4.73	4.57	5.87	15.07	6.71	8.11	3.27	0	0	3.33	15.19	6.25	0	16.53	0	12.97	10.27	0	1.21	7.12	0	7.36	10.35
YDL011C	81.82	0	0	17.05	8.95	13.25	28.3	0	19.31	8.44	16.8	9.49	0	10.34	17.4	0	0	9.26	13.88	0	9.3	0	0	16.94		YDL011C	1.91	10.03	5.44	0	0	6.37	12.39	0	0	0	9.99	13.48	14.1	16.16	0	8.42	0	0	8.27	16.87	0	0	24.17
YDL012C	127.67	62.23	107.66	120.18	154.81	98.69	127.78	144.58	140.05	167.26	146.01	132.78	68.75	117.12	126.23	170.74	97.46	144.85	172.67	166.1	96.47	116.96	170.2	104.52		YDL012C	58.71	77.09	42.93	92.63	63.99	38.6	86.39	0	0	46.4	96.18	25.56	28.19	69.75	0	54.77	0	143.21	8.71	90.39	60.61	28.06	89.09
YDL013W	25.47	7.03	7.6	13.57	17.59	10.26	21.06	18.79	17.7	22.48	17.38	14.17	12.16	14.36	13.48	14.17	11.53	11.6	23.88	15.19	10.89	11	30.51	8.85		YDL013W	1.56	1.13	0.85	1.64	3.81	1.52	1.53	0	0	0.5	5.3	2.16	1.41	2.97	0	1.96	3.07	0	0.33	2.75	0	2.11	1.94
YDL014W	220.73	131.3	93.21	152.84	191.42	161.64	85.25	157.67	156.11	80.22	181.14	152.74	98.53	123.64	80.78	101.78	84.8	85.49	112.33	105.12	73.32	109.42	181.74	75.41		YDL014W	90.74	147.61	138.69	93.27	307.39	202.53	126.64	120.58	170.77	94.99	290.99	227.76	21.7	195.08	22.28	54.82	71.55	79.81	55.51	114.46	135.12	129.95	104.98
YDL015C	108.02	34.44	46.98	88.78	51.18	70.03	63.08	91.77	44.17	72.23	66.8	65.14	57.37	95.67	77.8	76.54	56.31	78.3	116.62	71.97	41.07	68.89	64.79	37.82		YDL015C	47.05	42.91	39.85	66.35	49.04	29.74	63.18	0	0	28.22	67.11	48.61	13.6	62.49	1.19	53.3	20.87	12.19	11.13	71.83	20.64	35.94	57.32
YDL016C	53.46	0	0	46.7	43.62	49.28	42.3	55	30.96	40.24	67.55	57.51	49.52	72.74	61.98	76.94	12.55	42.94	77.8	50.39	44.92	58.42	36.04	16.02		YDL016C	0	2.26	1.13	6.52	3.2	0	0	0	0	0	8.27	0	0	0	0	6.15	0	0	0	4.9	0	0	11.73
YDL017W	13.2	2.94	1.9	11.5	7.74	4.44	14.99	11.8	10.29	15.25	15.46	9.51	5.19	10.46	9.43	11.44	10.51	5.28	17.7	10.92	5.16	8.75	15.59	5.52		YDL017W	0.98	2.13	1.51	0.77	3.27	1.91	0.96	0	0	1.88	5.1	4.12	0.44	2.86	0	2.22	0	0	0.41	2.25	0	0.69	2.44
YDL018C	93.08	40.6	64.97	154.27	82.39	61.63	253.69	233.24	97.01	224.47	224.07	170.67	160.58	283	276.39	154.23	118.99	157.44	188.72	201.91	105.28	175.5	110.39	127.85		YDL018C	11.72	1.47	1.72	9.24	5.57	2.4	11.94	14.11	0	12.11	22.65	9.45	1.23	17.41	0	14.63	10.66	0	2.27	11.79	0	1.91	9.82
YDL019C	14.7	2.66	8.75	16.45	9.24	7.48	22.47	13.64	9.23	17.92	16.03	11.26	10.82	19.82	9.34	18.38	14.29	15.19	27.22	13.17	12.15	11.01	25.69	11.51		YDL019C	3.55	1.09	0.87	5.31	2.55	1.64	4.35	0	0	2.95	4.82	3.35	1.93	6.54	0.24	5.98	0	0	0.6	5.96	0	1	5.35
YDL020C	87.04	40.37	38.53	45.48	60.84	50.25	54.71	55.27	65.6	69.84	41.92	37.95	27.68	40.56	38.51	34.73	38.62	32.58	62.59	30.29	23.93	38.81	67.86	26.89		YDL020C	4.33	10.43	11.95	10.48	30.78	12.99	7.28	9.68	8	4.74	11.12	9.15	3.36	8.68	1.88	10.04	3.65	0	4.68	7.7	16.27	11.57	10.98
YDL021W	65.99	23.75	28.53	57.02	19.05	23.31	101.78	58.7	25.51	119.21	38.44	29.24	34.98	78.72	66.06	46.78	49.59	50.26	93.37	40.65	41.65	33.89	43.73	29.91		YDL021W	10.54	0.96	1.44	20.33	3.62	2.49	5.6	0	0	12.37	5.57	5.06	3.98	13.89	0	22.34	0	0	0.74	12.77	0	2.9	11.75
YDL022C-A	4.64	0	0	0	0	2.69	0	0	3.95	4.55	0	0	0	0	5.5	6.68	7.96	3.04	40.51	4.81	50.15	0	5.72	0		YDL022C-A	0	0	1.08	0	0	0	0	0	0	0	0	0	0	0	0	0	0	0	0	0	0	0	0
YDL022W	54.41	28.88	9.07	42	21.54	20.18	77.61	60.97	25.67	57.6	48.77	45.12	24.63	58.85	48.32	41.39	32.36	35.83	87.02	34.24	25.64	33	70.62	13.83		YDL022W	89.16	60.28	27.43	125.18	84.78	69.43	77.84	27.68	34.3	107.98	107.57	89.96	57.97	139.21	8.95	176.41	39.46	80.84	22.62	85.71	51.87	34.99	104.41
YDL023C	23.17	7.84	10.06	51.36	29.65	23.78	74.56	54.9	14.09	63.02	78.36	46.78	31.72	30.91	35.56	37.88	26.19	15.36	93.93	33.85	14.8	40.32	55.07	13.06		YDL023C	25.56	22	27.47	47.14	23.15	8.95	4.05	0	0	45.31	30.26	21.61	7.56	87.59	0	42.76	18.8	12.89	10.8	54.44	81.45	14.75	23.9
YDL024C	6.71	3.22	4.87	4.71	3.77	2.19	4.69	5.21	5.01	2.68	5.41	2.67	1.42	2.47	3.48	3.62	3.96	1.79	9.62	3.26	7.71	3.03	4.14	1.35		YDL024C	0	0.78	0.83	0.28	1.38	0	0.26	0	0	0.69	1.7	1.43	0.49	1.26	0	0.94	0	0	0	0.67	0	0.88	0.2
YDL025C	27.1	12.86	16.17	19.15	22.35	17.84	25.52	23.97	18.44	21.3	19.64	12.95	12.14	20.46	18.91	20.61	19.09	17.76	42.51	18.85	17.46	17.23	26.49	17.42		YDL025C	4.15	2.54	2.98	9.62	3.81	1.52	5.15	0	0	1.99	4.58	3.44	0.35	5.48	0	5.19	0	0	0.33	4.69	0	2.75	5.95
YDL025W-A	0	0	0	0	0	0	0	0	0	0	0	0	0	0	0	0	0	0	0	0	0	0	0	0		YDL025W-A	0	0	0	0	0	0	0	0	0	0	0	0	0	0	0	0	0	0	0	0	0	0	0
YDL026W	23.18	17.21	7.88	48.74	21.86	23.59	49.49	16.07	17.37	13.12	19.42	7.07	16.98	21.6	25.21	15.27	7.87	33.48	39.43	18.28	9.7	5.75	23.47	3.62		YDL026W	0	4.62	4.59	3.31	4.63	0	0	0	0	0	2.75	6.18	0	3.67	7.74	2.05	0	79.21	0	0	0	5.08	0
YDL027C	58.49	29.25	45.01	58.17	29.42	46.91	43.58	45.39	22.73	36.27	30.45	27.19	25.26	47.65	42.52	37.3	33.1	46.09	56.5	35.85	31.43	27.44	28.38	28.01		YDL027C	2.03	2.38	2.34	5.09	3.89	3.67	3.28	0	0	3.89	7.7	5.6	0.55	6.38	0	9.59	0	0	0.51	4.3	0	3.62	6.51
YDL028C	18.01	8.35	8.03	11.82	15.57	13.8	16.11	15.81	13.51	20.78	16.64	10.64	13.33	19.14	18.93	20.8	18.68	21.48	32.83	19.31	15.43	18.31	25.67	11.49		YDL028C	3.09	1.91	0.98	2.44	1.59	0.77	3.49	0	0	1.19	2.94	1.52	0.28	1.99	0	1.32	2.44	0	0.26	3.34	0	1.24	4.01
YDL029W	56.78	13.93	20.66	36.36	15.54	20.14	41.6	39.24	18.8	42.29	36.25	26.88	17.59	37.74	40.3	43.88	33.4	45.05	72.51	43.31	20.76	33.05	60.2	28.42		YDL029W	32.26	11.31	8.69	55.42	16.03	13.87	47.46	6.92	0	15.26	45.62	21.67	10.22	38.02	0	40.71	15.68	18.32	6.13	39.1	15.51	9.21	57.75
YDL030W	32.35	12.56	12.67	22.72	23.95	22.12	22.34	27.89	29.15	26.78	16.61	17.42	25.59	18.28	23.18	30.1	22.16	21.93	26.86	27.34	11.01	29.72	28.5	16.11		YDL030W	1.86	4.05	2.58	2.2	7.17	3.3	2.51	0	0	2.38	4	3.15	1.26	4.08	0	1.99	3.66	0	1.95	2.89	0	1.64	1.78
YDL031W	53.86	39.05	33.78	37.27	51.84	42.65	18.99	35.84	54.63	20.44	29.01	23.63	24.96	22.75	16.92	24.59	17.16	19	23.08	22.71	15.33	24.68	27.71	11.71		YDL031W	3.87	24.61	18.61	6.72	35.73	19.94	9.34	26.67	0	3.86	22.5	18.28	2.53	12.64	2.19	3.1	5.49	9.63	3.12	8.49	2.72	15.74	7.19
YDL032W	17.4	0	10.99	5.79	0	0	5.97	5.5	1.91	11.87	2.44	3.03	0	1.04	0	12.18	6.78	2.94	20.58	17.79	4.71	0	8.17	0		YDL032W	0	1.46	5.2	0	0	0	5.17	0	0	0	0	0	0	0	0	1.44	0	0	0	0	0	0	0
YDL033C	11.1	0	6	4.19	7.55	3.2	7.03	6.42	5.74	8.87	8	4.37	4.48	5.8	6.98	7.34	6.28	5.2	17.03	7.06	8.33	8.08	11.28	1.93		YDL033C	1.23	1.18	0.62	1.61	2.53	0.65	2.16	0	0	0	3.34	1.14	0	1.08	1.66	0.46	0	0	0.52	2.04	0	1.01	1.88
YDL034W	6.47	0	0	1.49	0	1.02	2.98	5.98	1.8	2.62	0	0	5.89	0	0	1.51	5.88	1.16	1.43	1.87	0	0	5.78	6.04		YDL034W	0.37	1.56	4.54	5.21	3.51	0	3.32	0	0	0	0	5.47	4.02	0	0	6.53	0	61.3	0	6.66	0	2.77	7.58
YDL035C	23.88	7.24	12.52	19.94	20.76	13.89	27.38	20.97	21.38	23.01	18.57	13.03	11.35	22	19.64	24.91	24.29	21.94	37.22	22	12.44	22.44	29.6	11.37		YDL035C	4.16	1.49	1.28	4.53	3.53	1.37	2.66	0	0	3.08	5.78	3.02	0	4.13	0	4.27	1.9	0	1.22	3.94	0	1.35	4.47
YDL036C	31.29	9.81	16.96	16.89	17.22	18.14	12.06	18.18	16.35	14.01	18.08	13.74	14.08	13.44	10.1	19.47	20.47	11.45	21.7	19.66	8.29	22.01	23.66	6.18		YDL036C	1.45	7.11	4.86	3.72	7	2.9	2.14	0	0	2.78	4.93	4.47	0	3.5	0.73	1.78	0	0	0.46	2.26	0	3.46	2.5
YDL037C	9.97	7.4	6.4	12.11	9.15	11.56	11.03	10.42	10.15	13.27	7.26	7.54	27.27	2.41	9.73	6.71	3.31	2.95	11.94	10.34	9.74	13.14	13.9	7.77		YDL037C	2.19	0.3	0.22	0.43	0	0	0	0	0	0	0	0	0	0	0	0	0	0	0	0	0	0	0
YDL039C	11.08	4.1	5.32	9.84	8.4	11.61	15.23	17.89	13.44	19.01	12.06	11.75	30.79	5.14	12.75	6.44	3.67	3.33	10.79	12.32	8.09	17.01	28.02	9.68		YDL039C	0	0	0	0	0	0.12	0	0	0	0	0.15	0	0	0	0	0	0	0	0	0	0	0	0
YDL040C	28.48	8.22	11.02	19.05	19.25	14.84	18.71	20.83	15.44	13.89	18.54	14.13	6.72	15.81	13.97	17.58	13.79	15.66	24.33	18.66	9.73	12.36	37.16	10.35		YDL040C	18.06	18.38	12.99	20.73	27.75	15.05	18.12	5.72	9.44	8.75	31.73	24.08	3.72	20.99	0.37	9.85	8.63	7.57	3.91	22.28	3.2	13.66	22.17
YDL041W	13.46	12.6	16.39	15.31	55.68	6.09	36.53	36.24	47.11	17.44	30.72	26.5	9.94	8.29	9.57	14.58	15.67	5.78	19.08	8.88	21.01	21.51	48.46	6.5		YDL041W	0	8.02	7.74	0	0	0.72	0.14	43.62	0	0	3.54	7.77	0	0	0	0	0	0	2.01	4.66	0	3.69	6.69
YDL042C	23.93	14.35	11.28	21.98	22.73	18.69	16.83	23.43	16.86	12.22	20.75	17.03	15.12	17.7	9.9	18.44	13.55	10.32	21.91	20.77	12.9	25.15	21.63	11.38		YDL042C	5.22	8.16	5.33	3.89	13.87	9.95	4.89	0	7.5	2.78	9.67	4.37	0.39	6.61	0	3.5	6.85	12.01	0.89	5.47	5.08	6.27	4.79
YDL043C	95.94	38.77	64.27	86.67	67.44	87.58	73.89	67.32	55.65	57.06	52.94	42.38	63.53	63.05	58.91	59.39	61.43	58.22	51.18	60.68	34.6	52.62	49.37	46.79		YDL043C	5.02	9.76	7.74	5.66	16.61	4.2	6.33	0	0	6.88	5.36	3.54	0	4.41	0	7.31	0	0	1.81	6.26	0	6.84	8.22
YDL044C	60.4	29.41	38.16	48.95	38.48	49	51.99	40.93	39.03	51.59	32.72	28.21	41.67	41.97	41.18	45.6	37.93	53.2	49.24	43.96	20.97	50.4	40.92	40.68		YDL044C	4.22	0.84	3.57	2.73	2.37	2.25	2.83	6.02	0	0	2.61	2.84	1.05	2.7	2.33	1.16	9.09	0	0	2.87	0	1.49	3.08
YDL045C	98.24	40.4	71.06	72.82	45.72	65.29	61.05	53.48	41.31	58.95	41.5	35	34.52	58.2	46.21	42.7	35.55	53.84	51.1	46.23	27.33	47.25	40.73	30.53		YDL045C	2.99	5.53	6.21	7.08	12	7.64	4.84	0	0	1.15	10.56	5.16	1.63	7.35	2.42	4.97	0	0	3.02	3.73	0	6.12	7.54
YDL045W-A	275.47	218.03	179.15	172.96	250.98	218.98	283.33	248.65	251.99	203.69	222.93	183.29	255.32	297.86	225.75	284.25	219.49	294.22	308.15	226.86	196.64	348.3	266.57	251.73		YDL045W-A	91.96	57.97	59.51	72.54	33.63	77.27	46.29	75.8	0	46.44	65.75	38.8	26.34	55.24	0	32.9	0	0	18.32	57.3	0	34.19	66.58
YDL046W	149.8	24.08	85.93	87.36	108.08	64.11	115.18	90.71	80.3	76.29	86.02	68.26	59.87	94.01	80.02	80.76	47.14	63.25	109.66	71.6	27.15	43.38	112.36	40.45		YDL046W	78.86	101.15	77.78	97	150.65	91.05	139.63	62.8	0	76.95	124.37	73.78	30.91	129.09	8.12	127.69	47.42	83.13	26.98	97.44	93.83	55.23	109.56
YDL047W	25.09	7.92	10.27	17.08	15.96	13.35	17.83	22.29	14.66	17.9	20.33	15.46	11.08	15.08	14.88	18.56	10.04	14.2	35.54	20.33	20.08	14.05	36.51	7.76		YDL047W	19.33	15.63	16.64	18.48	22.61	18.7	18.53	18.35	0	28.1	30.64	18.24	1.59	19.54	0	14.6	6.93	12.14	2.22	21.17	10.28	10.97	19.81
YDL048C	109.36	76.33	30.37	80.79	75.95	54.76	117.44	91.35	67.35	86.74	75.05	78.17	56.33	92.57	57.8	109.82	101.43	90.75	101.8	75.91	51.2	100.41	117.39	45.83		YDL048C	11.52	40.96	31.99	9.89	16.74	13.53	10.22	0	0	2.6	26.01	7.52	3.23	11.6	1.37	12.92	0	0	4.7	10.77	29.74	12.93	12.63
YDL049C	106.25	35.19	65.02	37.06	41.19	57.01	33.25	37.38	52.97	22.51	23.3	26.89	16.96	23.63	26.45	18	17.89	25.68	37.02	30.69	28.85	20.04	26.24	11.42		YDL049C	2.84	22.81	23.09	3.92	15.35	13.98	1.57	0	0	1.36	9.65	3.28	1.93	2.49	0	1.61	8.4	0	1.79	0.88	0	10.53	1.22
YDL050C	170.78	158.28	260.76	217.52	312.13	321.49	104.7	257.03	317.26	134.62	269.74	205.84	212.88	211.32	144.8	157.28	135.84	169.42	134.72	230.44	153.96	124.43	147.36	133.54		YDL050C	12.09	34.67	31.4	31.32	76.02	30.39	23.03	39.08	55.02	8.05	57.61	35.87	2.47	23.88	1.93	12.92	0	0	7.25	21.83	124.83	23.66	33.06
YDL051W	305.43	274.93	227.8	280.02	243.53	286.09	133.21	187.02	222.33	133.91	178.3	165.12	154.6	154.81	136.01	99.72	103.74	113.97	98.15	149.71	66.59	136.23	109.69	135.92		YDL051W	27.56	54.36	42.93	22.24	83.48	39.86	34.06	0	20.39	20.18	82.05	51.72	5.86	44.05	5.03	22.62	8.12	14.23	11	33.34	13.85	46.1	29.86
YDL052C	29.84	13.64	15.33	20.5	18.09	11.95	14.46	19.59	17.58	30.37	25.6	20.5	11.45	20.53	16.44	18.42	11.59	13.05	57.44	25.43	16.91	13.67	35.54	10.31		YDL052C	29.67	13.19	11.91	46.81	34.12	18.05	32.52	9.48	0	29.05	35.78	21.66	12.36	30.3	1.23	20.12	35.81	0	5.35	34.33	0	11.76	35.06
YDL053C	162.3	81.26	114.8	139.11	183.91	148.5	156.01	189.92	226.97	166.39	163.9	137.32	166.38	184.27	154.88	132.11	158.76	165.18	201.44	171.3	131.31	203.63	185.63	159.21		YDL053C	36.08	14.4	16.59	20.87	40.85	24.96	38.93	37.67	0	11.54	31.85	24.1	3.27	29.56	0	17.26	0	0	3.03	37.47	0	13.59	33.78
YDL054C	20.47	4.62	11.33	8.53	8.42	6.87	9.29	8.68	9.93	9.86	6.04	6.09	7.15	7.3	8.57	10.12	7.58	10	21.78	11.25	13.46	10.62	11.4	6.47		YDL054C	6.84	4.66	3.46	6.21	4.75	3.46	8.05	0	0	4.6	5.11	3.59	2.79	4.51	0	4.52	4.05	0	1.73	8.53	0	3.62	7.84
YDL055C	108.53	65.78	71.12	79.65	56.04	78.32	99.61	169.48	71.88	150.12	196.24	164.22	147.27	209.68	293.77	159.38	119.19	196.63	300.74	216.29	117.41	164.14	138.97	125.65		YDL055C	574.81	83.47	109.38	646.94	131.14	95.84	609.45	182.93	163.72	501.6	404.64	271.96	157.6	366.66	30.56	163.02	282.06	413.71	36.84	575.61	316.05	89.05	439.7
YDL056W	25.3	21.11	21.91	27.59	42.34	27.23	40.74	41.73	40.54	48.42	34.89	28.4	47.21	43.79	41.89	48.79	51.95	44.5	55.43	46.45	44.75	65.6	47.28	35.99		YDL056W	2.62	1.53	1.97	3.84	3.91	2.39	4.69	0	0	1.8	4.97	2.89	2.04	3.79	0.38	1.77	4.43	3.89	0.24	4.67	0	2.32	4.3
YDL057W	14.14	7.4	11.74	10.82	11.08	6.71	19.76	24.32	12.07	30.32	19.01	10.37	19.09	17.89	22.5	20.37	21.53	18.76	32.07	24.68	16	23.97	17.47	11.92		YDL057W	1.1	2.09	1.12	3.46	1.69	0.87	4.03	0	0	0	3.35	2.03	0.75	4.81	3.33	4.14	0	0	0.69	3.07	0	0.97	1.88
YDL058W	31.38	17.29	19.67	27.27	31.32	23.62	45.76	29.05	30.58	52.87	27.06	21.64	42.36	39.3	29.63	43.68	47.59	34.48	44.46	40.33	34.96	51.69	45.83	32.35		YDL058W	4.26	1.59	1.22	5.59	3.16	2.18	3.62	2.61	0	2.24	5.72	2.26	1.14	4.47	0	2.43	0.99	0	0.53	5.36	1.46	1.65	5.31
YDL059C	32.77	22.53	27.6	27.04	37.36	19.28	49.57	46.52	37.55	55.74	29.98	20.56	35.67	49.2	49.9	29.93	36.12	36.56	46.65	46.17	29.63	41.16	33.22	40.2		YDL059C	0.83	0.45	0.46	1.97	2.57	0.89	1.84	0	0	1.6	4.53	1.54	0	2.2	0	1.26	0	0	1.05	1.04	0	0.88	1.43
YDL060W	50.48	16.15	20.56	36.43	42.88	33.19	24.34	37.76	39.78	23.42	31.66	25.02	19.82	20.13	19.89	22.63	15.85	17.47	26.04	29.7	13.65	20.51	44.02	16.76		YDL060W	4.98	12.47	7.97	5.5	28.13	12.93	7.91	6.24	10.31	6.88	21.91	15.97	1.63	14.16	1.21	2.56	2.36	8.26	3.27	10.67	6.99	11.18	8.68
YDL061C	8082.8	6317.76	5303.76	5619.36	8954.91	6712.62	6374.99	6818.84	9434.93	6573.9	8513.36	10741.3	7102.81	6191.01	6587.94	4987.48	7981.29	6156.31	5146.82	5825.6	7230.97	8556.04	10044.1	7450.45		YDL061C	6566.16	5221.92	2958.85	6555.97	5031.48	3665.95	5646.68	2583.92	5336.67	4037.24	10385.1	3043.22	1290.73	6326.41	250.61	3480.94	6829.72	2565.49	1353.05	5545.04	2895.65	1908.54	5392.38
YDL062W	52.18	18.22	27.34	33.93	37.28	22.22	22.63	22.19	39.88	21.9	15.92	7.96	31.24	10.75	6.74	10.43	6.04	12.65	18.08	17.58	13.14	21.47	22.12	17.73		YDL062W	0	0	8	0	10.68	2.89	0	0	0	0	0	0	0.79	0	0	0.81	0	2.21	6.91	0	0	3.69	0
YDL063C	70.68	30.24	32.66	47.34	61.96	60.43	19.27	43.54	51.97	19.45	31.55	30.77	33.44	28.68	27.08	29.05	24.8	27.12	20.93	36.93	13.03	35.51	24.62	17.45		YDL063C	3.63	16.95	9.54	2.87	32.59	13.69	7.25	4.06	0	5.97	19.38	14.16	1.3	10.02	1.05	1.36	3.07	21.21	1.35	9.7	0	11.32	8.33
YDL064W	116.99	134.37	61.17	138.78	131.08	121.23	118.37	154.34	124.96	149.34	137.69	125.21	115.63	160.7	134.43	126.03	109.16	113.56	136.18	144.31	79.73	124.05	160.42	92.04		YDL064W	37.68	21.37	28.31	59.44	50.9	20.89	38.11	24.59	0	39.17	43.72	24.69	8.54	38.59	0	26.08	18.57	32.55	0	47.93	0	18.3	38.7
YDL065C	271.94	243.69	274.61	335.82	305.84	270.9	418.75	289	322.11	365.54	277	205.64	242.29	328.93	304.53	214.5	296.16	263.77	231.6	285.93	261.52	260.55	241.25	244.96		YDL065C	4.68	4.25	2.98	8.62	6.42	1.94	5.74	0	0	3.99	8.83	3.85	4.25	8.68	0	8.25	6.15	0	1.31	5.83	0	4.96	12.22
YDL066W	32.13	16.09	11.6	32.65	15.35	27.27	51.1	43.29	21.65	40.72	26.79	23.22	33.57	46.1	47.51	48.45	45.59	52.98	63.25	50	39.8	37.51	48.89	29.27		YDL066W	99.99	17.28	17.67	94.21	30.33	25.55	114.14	24.86	0	68.54	73.31	39.4	26.45	60.27	5.63	64.13	37.54	106.94	10.51	117.19	69.64	14.72	99.17
YDL067C	4082.14	4273.53	3141.87	3152.37	4335.79	2721.59	4191.15	3630.3	2960.39	3281.52	4569.22	3665.31	3776.99	2343.29	2674.76	3073.09	5704.35	2628.05	2729.55	3176.27	4496.76	3212.69	3391.68	3977.24		YDL067C	1644.35	1153.5	885.57	1371.95	1293.86	1093.87	1419.12	0	1636.48	1456.49	1610.86	1043.37	387.2	1082.82	0	1146.3	373.99	655.59	359.06	1320.15	554.97	703.64	1341.36
YDL068W	95.43	96.99	49.8	66.41	60.62	69.51	77.05	81.47	57.37	91	52.89	66.12	92.38	60.1	67.83	53.47	87.29	35.6	60.08	91.25	80.39	92.52	62.92	100.95		YDL068W	7.42	1.79	1.49	0	0	4.55	2.83	0	0	6.32	0	0.04	0	0	0	0	0	0	0	0	0	2.13	0
YDL069C	30.77	25.61	53.52	37.69	45.65	61.32	57.68	61.92	46.32	58.85	40.26	31.8	58.49	61.27	61.17	44.43	36.97	47.68	54.98	61.29	37.72	52.24	46.93	41.25		YDL069C	3.3	0	0.92	4.16	5.43	0.66	3.77	0	0	0	4.18	3.24	1.2	3.09	0	2.99	0	36.46	0	3.29	0	1.6	3.53
YDL070W	89.21	106.41	59.73	94.18	143.56	99.25	84.5	111.57	120.77	96.92	104.33	92.86	102.55	122.78	98.14	88.98	113.96	101.04	133.04	109.22	68.6	106.38	108.54	87.21		YDL070W	8.8	13.27	12.05	16.85	23.09	9.9	14.05	7.87	0	7.23	22.02	11.93	3.42	14.78	1.53	7.97	14.86	0	3.17	13.15	4.41	11.8	15.12
YDL071C	21.59	0	9.56	19.61	17.25	7.51	19.53	24.89	23.33	25.45	27.86	14.08	7.32	29.27	13.66	10.36	4.94	9.44	25.16	11.95	9.34	13.85	23.11	6.96		YDL071C	0	0	1.68	1.93	9.47	5.22	1.8	0	0	0	1.67	0	6.67	2.15	0	0.93	0	0	0	4.59	0	0	0
YDL072C	218.97	89.47	154.77	222.67	107.5	158.24	209.53	204.21	96.29	145.84	155.66	140.36	112.37	249.45	185.21	152.38	142.22	179.78	201.45	158.45	103.52	138.65	144.69	127.52		YDL072C	84.67	36.99	33.84	80.81	63.75	33.38	94.59	16.37	0	50.15	127.8	53.19	32.71	111.97	8.47	92.36	61.81	86.69	21.1	69.04	73.38	28.43	65.31
YDL073W	25.55	9.88	8.24	18.64	20.79	19.56	22.38	19.57	18.58	25.29	18.18	14.65	24.63	20.66	21.81	26.47	23.84	22.54	25.24	25.46	13.72	23.65	30.76	14.96		YDL073W	0.47	0.6	0.64	3.34	3.27	2	2.42	9.81	0	0.6	5.11	2.37	0.64	2.2	0	1.72	3.71	3.25	0.2	2.64	0	0.89	3.14
YDL074C	124.13	87.84	97.18	111.63	130.73	130.12	108	106.14	135.76	125.36	75.11	74.03	111.72	97.82	100.08	104.52	111.97	122.57	97.08	111.11	74.56	125.1	104.02	96.06		YDL074C	7.48	4.07	4.65	5.9	11.55	6.64	7.34	7.1	0	2.18	7.85	6.01	0.31	5.77	0	4.11	2.68	0	1.14	8.62	0	3.84	10.01
YDL075W	2834.4	2057.79	2558.45	2989.42	2260.28	2048.22	3201.12	1907.28	2321.81	2190.04	3099.87	2541.78	2080.37	2348.27	1995.05	1817.56	2402.95	2285.12	1580.56	2220.35	1727.64	1991.76	2716.05	2612.58		YDL075W	1034.91	502.66	416.58	1178.17	990.02	482.09	1066.56	709.19	0	655.61	1154.73	891.58	310.19	885.88	122.28	778.77	742.66	938.85	162.55	1038.42	794.75	313.86	1092.35
YDL076C	136.63	68.04	74.79	106.53	77.44	86.49	105.81	75.04	80.97	88.16	73.86	50.92	55.75	91.69	81.93	68.07	86.25	86.69	78.79	77	37.55	60.39	83.01	67.25		YDL076C	6.29	2.4	5.24	7.45	6.8	3.68	8.33	0	0	7.25	9.4	6.4	3.42	6.08	0	7.84	7.44	0	0.79	10.98	0	5.33	8.66
YDL077C	6.78	2.64	3.71	6.54	2.57	3.43	8.02	7.24	4.61	8.1	6.28	4.28	5.82	10.47	7.59	11.93	9.29	10.08	13.69	9.8	7.06	7.43	10.92	3.87		YDL077C	1.17	0.24	0.3	2.54	1.24	0.54	2.04	0	0	0.56	3.18	1.35	0.6	2.06	0	3.2	0	0	0.74	2.64	0	0.57	2.85
YDL078C	176.38	107.4	125.2	163.77	135.75	165.9	211.17	197.89	126.88	202.88	174.63	141.26	122.26	201.79	194.29	137.96	137.89	157.53	189.35	179.83	114.5	138.95	144.6	166.15		YDL078C	24.88	22.01	20.25	53.97	28.81	19.58	43.47	0	13.41	19.89	53.86	32.12	9.17	42.77	1.05	46.96	12.26	10.74	7.85	41.66	0	13.91	41.89
YDL079C	84.31	83.33	159.59	58.71	50.81	56.74	69.77	81.5	59.2	106.07	43.56	37.34	57.21	63.89	92.79	41.73	66.91	56.68	70.29	88.07	85.55	59.19	75.17	102.46		YDL079C	0	0.36	1.26	2.08	1.02	0.18	0.24	0	0	0.63	0.67	0.51	0.45	0	0	0.87	0	0	0.83	0.82	0	1.05	1.33
YDL080C	19.73	10.73	2.58	11.58	8.61	5.58	9.3	9.07	8.22	11.29	8.68	7.59	5.8	7.15	8.2	11.52	10.67	10.59	17.19	11.28	5.71	6.72	16.88	4.76		YDL080C	1.59	0.86	0.69	3.34	5.72	0.56	1.56	8.29	0	2.03	5.21	3.02	0.72	2.32	0.54	1.2	0	0	1	2.97	0	2.24	3.34
YDL081C	1414.04	1036.16	1061.67	1409.4	1306.3	1133.97	1478.29	1346.68	1071.8	1448.47	1826.46	1591.93	1352.53	1582.25	1533.55	1447.34	1519.19	1433.7	1439.54	1464.85	948.01	1438.06	1682.31	1278.33		YDL081C	1319.92	410.36	329.21	1189.15	811.37	651.59	1403.23	665.01	457.83	2438.03	1761.77	1134.85	447.73	1155.81	28.67	911.3	795.17	1247.18	165.19	1212.72	621.04	296.22	1125.78
YDL082W	457.23	230.51	139.12	325.19	302.61	275.4	388.22	335.93	290.47	316.97	386.21	444.84	293.88	397.09	302.88	403.99	311.12	394.93	382.45	350.74	204.63	350.07	551.84	310.97		YDL082W	440.54	295.71	213.05	464	440.38	259.21	476.66	262.47	55.72	287.33	655.41	401.42	83.69	500.02	52	328.6	293.09	374.66	82.47	453.39	176.74	160.54	419.88
YDL083C	397.58	292.14	162.45	392.58	249.03	253.8	387.2	378.95	189.33	340.17	381.2	413.65	355.34	398.28	353.54	402.73	289.88	340.82	409.92	378.83	164.68	293.45	344.32	183.98		YDL083C	732.2	386.13	282.11	780.12	648.32	387.32	774.62	339.14	47.94	536.52	906.99	619.73	194.19	696.75	75.05	567.11	504.01	576.2	140.01	869.32	325.18	234.31	763.88
YDL084W	200.75	117.5	135.51	179.72	173.11	184.93	161.82	181.99	145.35	187	175.08	173.97	185.13	233.13	203.57	228.58	212.58	236.65	262.02	210.57	156.95	225.64	192.6	166.24		YDL084W	129.67	40.13	50.77	165.21	127.54	76.65	149.07	35.52	78.26	104.47	172.8	109.58	33.94	132.44	6.89	93.5	84.95	39.19	17.17	152.64	79.61	55.28	175.09
YDL085C-A	589.32	2521.73	1956.6	1718.74	2271.94	1741.88	3030.36	3435.69	2637.61	3682.9	2711.45	2314.62	4473.86	2895.06	4160.72	3457.47	4181.27	3294.1	4080.58	4770.84	6793.9	4669.68	3257.4	5916.55		YDL085C-A	32.93	17.93	6.75	155.85	12.71	8.76	48.45	0	0	157.99	44.73	25.39	0	14.46	0	31.08	0	0	0	41.04	0	0	37.75
YDL085W	6.51	2.7	2.92	2.12	4.75	1.53	10.54	4.95	5.71	10.03	4.16	1.55	2.69	4.9	6.27	5.83	3.93	2.42	11.28	7.12	6.09	4.23	5.65	3.69		YDL085W	1.2	0.98	0.57	2.6	0.23	0.32	2.21	0	0	3.45	0.82	0.46	1.63	2.11	0	8.72	0	0	0.38	0.75	0	0.85	0.86
YDL086C-A	0	0	0	0	0	0	0	0	0	0	0	0	0	0	0	0	0	0	0	0	0	0	0	0		YDL086C-A	0	0	0	0	0	1.36	0	0	0	0	0	0.01	0	0	0	0	0	0	11.54	0	0	0	0
YDL086W	22.77	9.37	14.85	25.74	18.88	17.44	39.27	37.36	20.12	31.16	26.67	20.68	14.48	40.91	40.52	29.28	25.84	30.66	55.08	38.39	27.27	22.49	56.25	13.11		YDL086W	45.74	34.33	22.91	39.36	32.1	21.24	38.24	10.85	0	22.61	54.6	20.3	10.37	49.89	2.81	45.27	32.78	14.37	0	40.59	36.48	14.69	36.94
YDL087C	16.4	3.31	11.46	12.45	14.22	8.26	14.47	13.06	12.52	19.5	12.53	10.55	6.59	13.39	11.01	13.05	13.34	11.04	21.06	16.57	15.87	14.53	22.92	5.56		YDL087C	0.74	4.4	5.12	6.38	9.08	6.65	4.87	0	0	0	7.49	3.63	1	5.17	0	4.44	0	0	0	3.67	0	2.6	3.37
YDL088C	35.59	22.42	7.88	25.16	27.06	22.96	29.43	30.18	25.38	29.05	23.16	18.92	18.27	16.41	21.76	21.55	18.18	20.82	36.95	22.53	13.03	18.43	42.38	17.35		YDL088C	5.29	5.08	6.54	3.68	9.12	3.15	5.26	0	0	1.19	8.87	7.29	0.42	6.83	0	3.64	7.36	6.45	1.57	5.81	0	4.72	7.84
YDL089W	20.57	15.48	9.37	18.91	15.41	11.69	24.79	19.84	8.78	17.24	19.3	14.6	9.24	25.04	12.92	14.81	16.28	14.28	28.05	16.11	9.6	13.1	13.95	8.45		YDL089W	2.75	0.94	1.27	4.07	4.78	2.93	3.29	0	0	1.32	3.27	3.5	0.94	4.53	0	4.93	4.07	0	0.43	3.64	0	2.06	3.35
YDL090C	32.56	8.86	15.33	20.73	10.03	13.66	25.25	17.97	12.02	22.46	23.09	13.32	12.14	30.89	22.33	19.29	13.88	24.08	31.11	19.88	13.99	12.22	17.4	16		YDL090C	2.36	0	0.81	2.48	1.82	0.63	3.18	0	0	1.51	3.21	3.28	0.54	2.42	0	2.23	0	0	0.5	2.7	0	0.42	2.93
YDL091C	56.56	21.63	39.57	51.75	24.99	38.32	61.23	48.72	28.66	49.82	41.71	33.69	36.76	67.72	49.49	41.04	53.97	62.52	53.34	44.74	36.57	40.13	48.44	44.35		YDL091C	2.95	0.8	2.17	2.91	2.57	1.77	2.45	5.78	0	2.83	3.26	2.85	1.51	3.24	0	4.18	8.74	0	0	5.75	0	1.83	3.6
YDL092W	945.25	650.95	656.86	686.2	719.7	532.83	614.92	466.18	596.59	628.4	511.04	396.15	522.04	410.03	319.8	365.58	460.24	354.18	346.09	359.46	342.02	541.21	415	479.12		YDL092W	19.62	58.28	39.72	28.14	71.62	27.53	36.75	0	92.32	27.39	76.34	34.66	2.43	39.16	0	26.27	21.1	0	4.5	43.35	0	34.66	42.95
YDL093W	7.64	2.87	2.48	6.19	3.35	3.22	7.46	7.81	3.51	10.4	9.92	6.82	5.71	9.46	9.54	7.37	5.76	5.82	19.49	10.77	9.44	7.19	6.16	4.02		YDL093W	10.62	0.92	1.13	7.87	2.79	1.7	7.97	0	0	4.08	9.23	3.6	4.62	9.3	0.43	3.29	2.51	0	0.27	9.92	7.45	1.65	7.54
YDL094C	3.02	6.25	2.7	0.66	2.51	3.99	3.28	4.44	1.37	1.63	4.38	3.98	15.19	2.66	2.42	4.04	2.92	3.1	6.05	6.48	5.29	3.92	6.04	2.63		YDL094C	0	0	0.2	1.13	0	0	0	0	0	0	0	0	0	1.34	0	0.54	0	0	0	0	0	0	0.83
YDL095W	26.82	16.39	9.7	27.44	28.73	16.28	38.91	34.73	30.23	42.58	46.38	37.22	33.73	44.78	34.6	37.76	32.99	29.1	56.54	41.51	27.22	44.3	48.12	27.87		YDL095W	46.91	13.97	10.68	44.19	20.8	16.76	55.07	6	9.91	29.76	62.98	38.48	15.11	58.16	2.33	30.87	20.38	23.81	4.11	54.01	33.6	13.93	53.37
YDL096C	4.48	0	0	9.86	18.55	0	22.11	12.85	21.2	23.65	29.99	12.01	6.71	20.2	7.4	11.68	30.59	6.49	25.82	32.46	0	14.28	17.61	6.66		YDL096C	0	3.64	6.66	3.68	3.3	4.43	0	0	0	0	3.78	4.41	0	0	0	0	0	0	0	6.86	0	0	3.19
YDL097C	97.57	56.27	30.42	94.16	74.45	83.92	77.15	95.57	48.66	54.46	89.16	73.02	41.18	93.15	52.58	68.28	49.96	63.38	81.23	52.99	24.78	57.28	77.79	38.76		YDL097C	23.42	21.68	21.28	33.87	60.87	40.51	26.13	12.23	0	13.48	69.73	35.39	7.43	55.18	3.95	34.64	18.47	8.09	11.82	27.73	27.4	22.33	34.68
YDL098C	88.6	201.53	69.73	95.19	134.67	141.54	116.28	159.61	123.18	107.68	107.27	97.55	106.87	127.83	126.92	95.46	81.15	95.53	120.92	110.98	76.68	135.72	87.54	76.15		YDL098C	5.59	7.31	6.72	11.47	12.95	8.33	3.29	0	0	6.44	6.84	3.1	1.52	1.96	0	5.49	0	0	0	8.36	0	5.53	12.82
YDL099W	234.33	148.15	232.89	196.62	240.4	167.64	211.72	159.92	254.29	236.55	166.34	142.28	129.9	160.64	117.57	107.64	158.88	120.11	151.69	126.46	140.51	176.05	181.59	124.4		YDL099W	4.7	4.55	4.28	9.47	8.86	6.95	6.14	0	0	3.01	11.7	5.47	2.84	9.17	0	5.52	6.17	21.65	3.29	6.83	9.16	6.08	10.17
YDL100C	181.66	101.06	99.06	174.17	168.25	123.8	135.65	129.01	150.74	127.61	135.26	127.29	86.34	174.38	89.02	91.42	87.92	82.29	113.53	99.84	69.63	99.89	102.6	91.93		YDL100C	60.32	39.08	27.58	58.2	70.81	31.57	61.25	31.23	0	44.01	109.03	62.57	20.35	76.6	1.01	51.19	35.38	31.01	10.69	65.23	17.5	26.59	66.3
YDL101C	13.02	1.45	2.51	12.55	7.91	6.01	28.3	17.74	9.49	35.21	24.54	23.61	16.64	37.55	31.11	19.42	14.9	19.29	25.55	20.94	10.61	20.87	16.31	11.86		YDL101C	6.11	0.7	0.4	4.31	1.49	0.34	5.2	0	0	3.08	11.35	6.24	0.87	7.34	0.65	2.55	0	0	0	5.01	0	0.34	3.5
YDL102W	18.09	6.91	7.61	10.3	10.67	9.4	12.22	14.78	11.59	11.5	13.91	10.56	7.78	17.61	11.31	12.73	8.57	10.79	15.97	14.01	6.2	11.02	12.13	8.97		YDL102W	3.49	4.33	3.45	4.62	6.57	5.05	3.9	8.74	0	3.48	10.61	10.28	0.57	8.94	0	2.9	1.65	5.78	0.35	6	0	3.7	5.04
YDL103C	22.77	4.72	5.45	27.45	19.05	18.79	36.67	31.48	14.87	27.01	36.83	27.88	19.48	41.92	22.39	24.81	19.02	19.23	36.9	27.66	13.76	23.18	26.09	15.87		YDL103C	16.08	9.9	7.93	18.48	12.68	6.88	15.69	10.95	0	7.38	24.46	16.92	4.28	26.09	0.71	18.61	4.13	0	1.76	14.16	18.4	5.68	16.03
YDL104C	21.25	9.49	17.23	14.46	19.99	12.61	20.12	16.83	10.54	22.83	26.31	11.36	25.15	22.48	24.19	27.94	30.56	33.06	33.66	30	29.95	30.31	28.69	16.73		YDL104C	1.26	0.69	0.75	1.66	0.65	0.22	1.55	0	0	2.42	0.86	0.52	0	0.74	0	0.95	0	0	0.53	1.05	0	1.04	1.93
YDL105W	11.54	3.85	5	10.85	11.65	4.94	17.22	16.27	12.2	16.76	16.99	15.7	11.06	17.45	16.81	8.85	7.32	10.2	17.53	15.35	11.94	12.67	15.18	8.49		YDL105W	3.42	1.16	1.11	1.01	2.31	1.14	1.26	0	0	0.82	5.23	1.45	0	4.88	0	1.13	0	0	0	3.46	0	0.75	1.96
YDL106C	32.5	17.07	21.58	27.69	26.13	17.06	31.26	27.36	24.37	35.46	29.06	23.58	27.85	32.77	30.34	34.61	30.85	33.92	45.47	34.6	27.39	35.79	42.88	20.12		YDL106C	2.04	1.43	1.55	3.68	4.05	1.24	3.65	0	0	3.36	4.75	2.9	1.98	4.1	1.18	6.25	0	0	1.1	6.36	0	1.54	5.85
YDL107W	44.93	15.89	34.35	46.9	31.88	33.76	47.66	39.3	24.95	36.59	30.83	21.1	26.57	37.65	42.08	35.55	36.55	41.09	50.59	47.53	19.83	26.3	27.38	33.35		YDL107W	4.03	1.37	2.34	2.38	2.33	1.34	1.85	0	0	0.97	1.71	2.17	1.37	1.77	0	0.76	0	0	0.64	2.83	0	1.07	2.31
YDL108W	50.52	16.16	20.97	23.62	27.33	26.04	30.52	24.65	21.25	35.51	24.52	19.9	20.24	24.03	22.48	24	24.71	28.3	37.82	27.66	16.7	15.19	29.9	17.53		YDL108W	2.99	7.16	5.72	5.66	12.46	5.41	4.84	0	0	6.89	9.75	4.61	0.81	5.78	0	4.52	0	0	0	4.84	0	4.44	7.54
YDL109C	5.52	2.23	2.89	3.84	6.31	1.6	6.37	3.14	4.46	5.99	4.06	3.41	5.91	3.11	3.96	5.02	3.74	3.05	10.89	5.27	5.34	4.54	8.96	4.45		YDL109C	0	0.4	0.14	0	0.19	0	0.55	0	0	0	0.34	0.15	0	0.43	0	0.19	0	0	0	0.15	0	0.35	0.71
YDL110C	252.33	107.19	245.03	225.39	126.98	150.33	353.41	229.62	157.42	289.07	164.09	121.91	91.35	233.76	189.32	106.29	147.31	126.87	206.99	115.88	79.85	122.32	202.01	126.98		YDL110C	44.19	32.39	33.67	63.02	47.24	29.85	43.77	0	0	16.31	46.18	26.21	18.5	53.72	0	108.46	40.2	0	10.72	33.89	0	21.01	41.89
YDL111C	58.36	9.74	16.85	31.52	29.77	38.49	29.7	37.94	30.31	28.25	35.93	26.47	30.13	30.78	24.59	25.89	15.98	25.23	43.73	27.64	8.24	18.31	47.01	13.63		YDL111C	12.97	19.62	19.59	26.15	50.08	26.08	19.09	11.29	0	11.07	37.69	18	0.98	23.41	2.92	11.97	17.05	14.94	6.37	17.96	0	16.29	14.46
YDL112W	47.07	26.01	21.68	29.97	40.88	30.93	13.33	28.7	32.43	18.82	23.05	20.18	24.24	20.24	14.8	25.51	19.05	18.3	25.39	21.54	13.86	27.85	23.21	16.08		YDL112W	6.09	9.26	6.18	6.13	16.53	10.17	7.26	3.29	2.72	4.84	15.4	10.52	0.86	8.2	1.49	2.62	4.97	4.35	2.52	7.78	3.69	8.94	7.16
YDL113C	26.89	25.95	20	26.73	28.83	28.54	36.47	40.18	27.96	33.64	34.76	25.58	22.18	44.35	34.95	35.34	33.82	31.02	52.43	31.86	20.35	32.86	33.21	28.65		YDL113C	2	0.82	2.26	1.78	3.67	1.07	2.58	0	12.96	2.4	3.91	2.47	1.36	3.08	0.51	3.31	5.92	0	0.63	2.65	0	2.3	3.88
YDL114W-A	0	0	0	0	0	0	0	0	0	0	0	0	0	0	0	0	0	0	0	0	0	0	0	0		YDL114W-A	0	0	0	0	0	0	0	0	0	0	0	0	0	0	0	0	0	0	0	0	0	0	0
YDL114W	5.22	0	0	0.84	0.52	1.41	2.78	0.38	2.38	2.05	4.49	1.02	1.77	0.37	1.24	5.76	2.39	2.28	6.84	2.89	3.76	3.35	2.15	1.12		YDL114W	0	0	0	0	0	0	0	0	0	0	0	0	0	0	0	0	0	0	0	0	0	0	0
YDL115C	246.28	164.51	198.81	216.42	185.99	158.09	213.9	154.52	157.78	204.19	136.99	110.23	135.44	138.86	115.45	137.81	208.21	144.36	127.83	125.16	102.9	177.88	144.65	140.03		YDL115C	3	1.36	3.01	3.16	3.86	2.93	4.42	0	0	1.92	4.76	3.24	1.36	7.03	0	5.86	0	0	0.63	4.05	0	2.3	2.58
YDL116W	45.12	25.51	24.19	32.26	26.23	36.68	30.71	31.64	26.61	30.14	24.87	19.5	28.4	32.83	30.63	41.32	31.83	41.74	40.02	36.33	15.76	32.27	31.1	19.36		YDL116W	7.62	9.84	7.74	10.65	10.43	6.38	8.33	0	0	6.69	9.91	9.74	1.19	7.65	1.32	4.36	2.58	4.52	1.92	9.64	3.82	6.62	10.36
YDL117W	12.26	2.37	4.45	7.43	7.56	5.85	6.17	8.02	9.49	6.68	10.19	7.05	6.82	10.58	6.84	19.21	13.62	19.32	20.63	12.72	8.92	15.36	36.52	6.97		YDL117W	2.81	2.1	1.2	3.88	4.74	2.34	3.36	0	0	3.03	3.82	2.38	0.48	3.7	0.36	1.26	0	0	1.11	4.27	0	1.92	7.75
YDL118W	64.21	15.24	35.28	42.42	23.37	29.58	61.26	22.18	27.75	53.89	29.51	27.82	19.64	29.44	30.72	33.54	28.14	41.63	39.8	53.7	11.22	19.35	53.47	24.78		YDL118W	3.4	0	0	0	0	2.52	0.99	0	0	3.2	4.51	0.74	0	0	0	0	0	0	0	4	0	1.35	3.12
YDL119C	13.93	9.59	10.87	15.39	1.46	9.18	13.9	10.3	5.85	12.56	12.88	4.63	10.48	16.92	16.12	16.24	12.14	17.96	29.7	16.61	13.82	15.31	17.65	11.8		YDL119C	2.72	2.92	2.68	6.11	0	0	3.26	0	0	1.48	3.32	1.47	0	3.14	0	3.82	0	0	0	3.45	0	0.92	3.31
YDL120W	18.65	11.93	10.32	24.29	13.97	13.06	23.57	26.88	19.89	22.9	20.05	16.72	22.41	14.97	21.67	24.62	26.69	20.38	35.09	12.09	18.5	9.34	23.99	8.77		YDL120W	15.89	18.75	11.94	33.43	20.45	14.8	29.23	20.74	0	25.41	39.58	17.56	3.6	23.25	5.36	32	0	0	3.34	33.01	23.24	10.76	38.71
YDL121C	622.71	697.34	549.54	498.22	876.81	519.58	335.1	595.65	624.28	417.46	605.59	591.18	775.53	532.51	429.87	485.47	676.01	405.01	419.67	668.02	469.52	786.29	459.95	574.16		YDL121C	37.84	44.95	41.12	31.21	58.43	24.71	51.88	0	0	19.81	64.25	40.84	4.68	40.77	0	18.83	61.03	0	10.85	52.51	60.37	33.41	56.2
YDL122W	86.3	39.23	45.24	49.96	89.63	55.23	53.38	51.18	83.99	45.85	49.21	37.53	42.95	43.38	32.33	44.72	53.82	45.04	47.38	47.71	33.17	54.61	73.9	48.49		YDL122W	5.03	5.27	5.87	7.33	24.5	11.74	10.68	6.06	0	6.68	11.7	11.34	0.79	10.02	0.39	5.63	4.58	4.01	2.44	11.21	3.4	9.23	8.98
YDL123W	26.01	8.68	7.51	29.91	23.72	24.26	28.88	22	21.23	25.56	34.05	35.39	5.76	32.68	24.15	18.73	15.54	20.76	46.94	15.25	7.34	19.04	40.51	14.58		YDL123W	25.06	22.04	24.22	15.2	26.78	40	19.85	0	0	11.1	28.8	17.83	7.87	13.54	15.61	9.46	22.79	0	7.29	24.02	33.82	23.14	19.89
YDL124W	137.96	97.24	65.92	191.48	87.17	89.31	277.87	190.94	75.94	156.06	203.93	180.44	72.01	277.34	145.81	169.1	138.17	151.07	196.7	97.31	71.11	100.43	153.47	78.34		YDL124W	49.59	22.23	22.79	90.2	51.79	28.87	77.26	27.41	0	72.78	180.69	111.18	64.29	191.58	5.91	198.48	62.1	24.19	17.66	54.16	102.39	23.49	73.91
YDL125C	174.05	83.95	63.53	140.21	66.88	106.18	100.37	113.27	40.43	75.21	118.57	98.91	64.92	147.26	97.3	127.3	82.95	132.05	161.25	78.47	45.35	92.03	87.78	48.46		YDL125C	118.02	48.19	42.43	148.23	69.54	28.1	149.67	48.64	0	62.59	113.92	56.51	23.24	115.9	15.72	62.16	91.83	64.39	17.63	140.31	27.25	21.94	135.31
YDL126C	143.28	60.64	66.29	138.83	123.91	93.5	137.13	117.29	86.02	96.04	127.65	102.99	53.78	152.17	75.69	95.59	96.66	83.59	116.57	79.1	55.79	94.45	124.25	71.26		YDL126C	75.28	39.53	38.5	83.26	78.67	63.96	74.34	32.21	19.35	56.23	134.56	111.16	27.93	143.12	10.6	94.7	39.8	27.13	15.1	71.27	59.06	37.44	89.57
YDL127W	10.79	2.67	2.31	9.48	5.73	4.03	28.05	20.31	10.69	35.21	29.56	26.88	12.4	28.68	29.72	22.55	13.75	14.6	38.26	22.74	13.55	23.43	51.14	19.63		YDL127W	8.9	0.32	0.81	5.15	0.46	0.63	6.98	0	0	11.38	16.51	7.31	1.61	13.02	2.4	3.81	0	0	0	12.93	0	0.21	9.52
YDL128W	55.45	20.63	21.09	46	34.4	40.5	40.55	55.98	32.3	36	50.96	39.42	29.42	45.23	39.27	41.87	26.85	36.36	56.39	49.17	28.01	35.25	54.61	24.41		YDL128W	25.4	23.35	23.72	18.39	40.5	33.01	35.83	6.52	0	14.38	50.05	30.94	3.96	37.28	3.37	26.72	19.69	0	7.35	27.76	14.61	25.44	28.88
YDL129W	92.05	31.6	34.79	46.48	44.28	46.21	27.48	36.81	38.63	39.71	31.79	28.91	22.85	22.43	21.09	25.87	28.92	21.59	19.89	25.23	16.19	31.49	44.83	19.9		YDL129W	0.64	6.25	6.27	1.01	8.37	11.54	2.81	9.99	0	1.22	3.03	5.31	0	0.56	0	0.72	0	0	0	0.79	11.19	5.41	2.19
YDL130W-A	357.04	180.73	416.85	540.8	340.86	236.56	1352.82	848.21	622.63	890.48	607.55	376.01	592.33	810.42	765.74	683.71	721.02	545.41	1108.61	614.64	662.2	764.24	663.87	992.75		YDL130W-A	133.73	25.48	42.93	226.81	30.97	56.94	78.71	0	519.05	89.83	154.41	49.49	63.68	246.58	0	295.41	0	138.62	25.31	124.99	0	30.7	80.49
YDL130W	867.94	255.06	206.82	440.96	332.79	332.25	439.19	489.29	297.62	395.78	546.36	521.85	387.46	473.34	442.2	478.46	367.29	479.26	633.23	456.68	220.15	314.58	828.33	291.14		YDL130W	1748.1	577.98	394.61	1456.59	904.25	709.97	1515.17	609.6	549.39	1873.87	1804.01	995.74	433.29	1161.28	129	899.27	837.02	1100.45	227.69	1219.34	993.66	298.72	1158.24
YDL131W	36.03	25.35	31.79	32.28	46.34	37.13	52.75	50.46	53.24	45.4	41.28	35.4	43.79	43.91	44.66	47.62	45.51	45.39	54.26	55.75	31.13	57.01	93	43.9		YDL131W	45.42	28.84	25.17	31.77	39.7	23.5	29.58	10.61	0	22.82	45.97	24.13	6.87	34.78	3.07	17.29	23.05	19.42	8.21	44.78	13.26	16.38	43.1
YDL132W	63.64	17.29	31.41	56.24	38.81	43.29	68.06	53.69	30.46	60.98	42.51	36.02	41.27	61	47.17	51.99	44.49	51.41	67.18	49.31	32.66	51.74	57.45	36.85		YDL132W	8.64	2.09	2.96	9.39	4.89	5.11	7.77	0	0	5.89	10.16	9.06	0.26	12.14	0.39	7.68	9.08	3.98	0.97	10.29	16.84	3.25	10.45
YDL133C-A	0	0	0	0	0	0	0	0	0	0	0	0	0	0	0	0	0	0	0	0	0	0	0	0		YDL133C-A	0	0	0	0	0	0	0	0	0	0	0	0	0	0	0	0	0	0	0	0	0	0	0
YDL133W	108.37	29.65	72.41	96.31	67.72	74.29	97.56	74.66	66.29	83.71	66.21	55.99	68.6	80.97	70.49	65.11	70.24	77.62	72.3	78.49	54.57	75.94	78.01	54.56		YDL133W	5.42	1.05	1.85	6.11	11.96	5.36	3.42	0	0	2.97	12.36	4.06	2.63	4.42	0	5.26	0	0	0	3.62	0	2.74	4.66
YDL134C	185.03	55.67	73.63	134.44	101.12	110.44	135.75	101.06	113.96	111.31	99.87	83.98	73.22	103.93	73.83	77.84	91.17	87.16	91.82	72.08	59.3	80.4	119.52	60.88		YDL134C	21.66	8.61	11.04	24.43	42.66	25.94	28.27	7.42	0	12.45	48.49	29.83	6.09	44.32	0.96	27.54	5.6	19.65	4.6	21.31	16.63	15.66	25.9
YDL135C	109.98	52.18	61.54	138.64	65.71	87.4	201.7	143.59	74.33	211.26	150.16	96.07	135.2	198.38	196.82	140.15	125.22	151.52	188.08	157.04	92.25	167.9	127.44	94.6		YDL135C	26.32	6.88	3.31	29.07	15.45	3.36	19.37	0	0	8.08	31.47	7.47	1.43	24.04	0	22.27	37.36	21.83	3.99	25.59	0	4.83	27.16
YDL136W	1317.63	2096.39	2591.37	2116.4	1936.43	2525.21	2089.13	2040.73	2152.63	1781.78	2468.66	2978.29	2294.6	2336.28	2600.43	1858.05	1789.85	2506.4	1438.2	2317.66	1992.8	2019.34	1633.9	2545.15		YDL136W	361.21	313.99	263.74	417.91	294.92	187.54	257.55	597.77	578.98	193.24	399.92	364.63	29.95	349.75	26.66	279.52	0	354.74	51.33	514.19	0	177.28	396.66
YDL137W	302.24	369.9	358.72	319.69	249.7	310.92	428.5	433.33	212.37	456.05	304.6	278.4	328.68	403.66	482.02	334.6	379.14	410.06	522.63	463.63	401.23	397.94	333.49	288.25		YDL137W	146.92	47.93	52.78	173.94	82.4	50.2	142.09	0	32.19	117.21	116.03	79.13	63.5	112.66	2.68	102.32	58.86	103.17	6.42	156.6	174.68	43.81	151.2
YDL138W	11.86	8.36	4.02	8.05	8.52	5.05	7.73	7.06	11.05	7.37	9.11	6.15	7.8	7.64	6.1	10.28	6.86	6.51	16.66	10.05	9.43	10.77	15.1	4.68		YDL138W	0.62	0.79	0.45	0.98	1.43	0.33	0.3	0	0	1.19	2.24	0.83	0.56	0.72	0	0.47	0	0	0	0.39	0	0.73	1.54
YDL139C	36.42	12.33	12.45	32.19	25.67	24.84	41.04	30.68	31.53	44.73	29.37	23.04	20.89	29.81	23.19	19.28	22.08	28.09	31.98	27.23	19.7	25.76	53.58	22.44		YDL139C	0	3.48	2.87	2.16	0.7	0	1.34	0	0	0	3.1	0.56	1.24	2.4	0	3.45	0	0	1.15	1.71	0	2.26	1.57
YDL140C	30.38	10.88	11.1	20.73	26.62	12.86	20.61	20.85	21.94	20.6	24.45	20.45	13.31	17.72	15.71	19.32	18.87	12.15	32.71	18.86	16	21.92	41.71	13.3		YDL140C	23.3	15.64	9.88	26.28	35.51	19.33	24.63	9.46	8.93	14.41	48.94	31.08	6.46	35.31	1.92	18.12	14.29	16.1	5.23	29.68	10.6	15.18	30.27
YDL141W	6.49	0	2.24	4.66	3.24	4.08	5.5	7.01	4.38	6.77	5.09	4.76	5.73	5.79	5.53	7.79	4.88	6.56	15.85	9.26	3.8	5.85	8.01	2.4		YDL141W	4.15	1.88	1.54	6.91	6.22	4.29	5.93	0	0	2.21	8.14	7.03	1.25	5.26	0	4.18	13.62	4.78	1.45	7.75	0	2.44	8.98
YDL142C	64	35.74	27.05	44.77	28.47	27.44	69.98	45.71	29.46	57.17	39.63	31.49	53.3	51.48	42.57	48.33	65.96	53.42	55.09	50.31	39.45	68.1	57.97	40.01		YDL142C	7.93	0.72	1.17	7.3	3.06	1.41	3.4	0	0	3.81	5.39	2.45	1.8	5.8	0	6.99	0	0	1.67	9.06	11.6	0.93	7.2
YDL143W	123.01	42.03	35.15	82.78	72.99	57.67	47.05	60.17	59.79	35.5	60.64	46.05	30.03	50	25.98	38.77	34.79	36.02	50.9	38.06	26.85	29.84	79.57	22.06		YDL143W	36.08	38.78	32.68	37.05	88.36	50.49	45.77	38.97	72.43	23.88	98.87	59.85	11.85	66.09	3.15	30.18	40.46	12.9	10.99	37.99	5.46	36.25	38.33
YDL144C	33.99	4.46	10.61	18.86	30.03	13.98	34.78	25.44	20.82	20.27	23.43	19.6	11.83	19.28	14.99	17.15	17.46	10.29	26.23	19.29	10.06	13.27	46.28	13.11		YDL144C	14.36	5.12	5.55	8.98	16.05	11.59	17.85	0	0	12.35	17.49	9.01	2.02	9.56	1	16.83	0	10.26	1.25	12.03	0	7.52	8.23
YDL145C	26.54	15.41	9.87	22.76	18.6	14.22	26.35	20.41	18.33	23.74	25.19	18.83	16.4	26.66	21	28.05	23.5	21.4	37.74	25.3	12.07	21.64	39.3	11.62		YDL145C	39.66	9.52	6.65	42.68	29.05	15.11	42.88	19.84	13.12	24.8	51.3	36.14	9.48	44.84	1.8	24.98	13.49	15.76	4.64	46.74	24.46	11.99	51.28
YDL146W	17.66	1.52	5.27	12.56	5.35	9.66	8.71	12.65	10.49	11.3	10.67	5.43	9.76	10.19	11.3	14	12.61	13.66	22.83	15.02	6.87	9.06	11.03	4.8		YDL146W	1.69	0.92	0.74	3.47	3.65	2.34	1.24	0	0	1.95	4.13	3.02	0.92	4.45	0	4.21	0	0	1.28	2.95	0	2.03	3.49
YDL147W	401	331.25	327.12	451.11	425.76	420.99	321.48	326.95	333.97	278.39	289.86	268.82	200.33	303.73	229.17	165.6	229.57	200.67	207.48	215.05	180.47	209.66	198.05	236.21		YDL147W	22.36	30.13	26.04	30.8	61.45	31.67	25.38	5.94	9.81	18.91	50.72	38.22	5.67	38.27	4.61	30.63	4.48	7.86	7.65	24.33	6.65	27.85	29.11
YDL148C	291.54	160.18	208.19	178.74	241.53	180.46	85.17	124.29	219.52	88.68	108.77	97.91	105.41	94.66	65.38	81.41	95.62	73.16	54.34	89.88	63.3	118.07	100.27	83.15		YDL148C	5.99	28.51	20.06	6.1	39.68	17.17	7.54	6.05	0	3.71	23.89	19.78	1.84	15.1	3.13	3.72	6.86	4.01	3.9	7.83	6.78	17.27	8.86
YDL149W	13.14	4.87	4.81	8.13	8.55	5.83	9.26	7.35	9.51	8.01	7.8	6.29	3.84	7.08	6.34	8.35	5.92	4.58	13.93	7.33	6.28	7.63	10.19	4.82		YDL149W	0.62	0.67	0.84	0.97	0.83	0.08	0.8	0	0	0.89	1.36	0.95	0.42	0.95	0	1.98	0	0	0	1.73	0	0.98	2.12
YDL150W	96.64	59.98	43.23	68.61	99.65	59.46	60.5	77.54	90.93	57.24	82.89	54.39	54.22	42.8	32.88	42.21	37.81	37.43	45.67	53.36	31.25	61.31	107.08	36.63		YDL150W	3.75	9.12	7.77	2.99	22.38	15.03	5.05	9.75	0	5.13	21.65	11.35	0.55	11.69	0.82	3.48	4.77	0	2.04	6.52	0	7.95	6.88
YDL151C	9.14	0	0	6.03	0	2.21	6.23	2.16	4.99	2.54	3.83	3.94	0	7.85	3.87	2.09	0	0.83	4.39	4.62	0	6.85	11.26	0		YDL151C	1.91	5.2	5.25	4.09	2.75	0	0	8.06	0	2.96	0	5.47	0	0	0	0.91	0	46.74	0	2.16	0	3.66	0.81
YDL152W	90.21	41.61	64.78	59.55	94.6	67.47	34.47	58.8	71.43	32.25	55.17	30.75	25.12	32.48	22.74	25.03	21.57	33.01	25.61	26.75	25.07	44.27	31.32	30.22		YDL152W	0	17.94	15.09	0	16.21	7.99	4.27	0	200.68	0	3.92	14.46	0	9.08	0	2	0	0	3.46	11.44	0	6.3	0
YDL153C	482.7	456.36	470.01	373.09	520.96	438.91	161.42	289.27	465.83	159.84	243.93	206.83	201.24	202.92	131.49	143.46	176.19	149.31	98.99	186.73	108.81	191.58	171.81	180.55		YDL153C	5.81	32.83	24.7	5	40.14	22.38	9.09	8.28	13.67	6.08	22.57	24.1	2.16	16.7	4.82	3.39	3.12	0	5.65	10.03	0	18.67	10.15
YDL154W	14.55	9.31	9.06	7.94	7.57	6.85	12.34	7.86	9.83	9.63	8.04	4.15	5.83	10.06	6.71	9.75	8.5	9.87	14.79	9.33	7.22	11.66	9.24	4.89		YDL154W	0	0	0.09	0	0	0	0	0	0	0	0.12	0	0	0.15	0	0.07	0	0	0	0.11	0	0.06	0.1
YDL155W	31.52	8.96	14.73	23.2	23.43	15.84	31.31	31.29	26.69	39.91	29.63	22.83	25.74	33.23	30.19	35.14	30.88	30.16	51.69	39.97	17.18	30.88	53.92	23.33		YDL155W	7.96	1.52	1.9	10.04	3.99	4.66	4.1	0	10.3	4.58	3.78	4.42	1.62	6.64	0.81	1.95	0	8.25	0	7.44	20.95	1.97	9.12
YDL156W	5.18	2.84	4.3	5.78	6.37	1.29	6.94	5.6	5.21	6.9	7.75	5.06	1.57	4.55	3.4	6.39	2.86	2.42	11.72	7.29	6	4.45	5.48	1.79		YDL156W	1.58	0.69	0.47	2.98	0.97	0	2.09	0	0	1.81	7.71	3.11	0.43	5.26	0	2.5	0	0	1.19	2.55	0	0.45	2.71
YDL157C	177.97	270.79	122.43	272.39	235.35	243.53	194.51	311.95	170.99	220.54	244.82	235.18	198.54	310.58	251.09	172.02	143.19	172.42	221.84	242.85	124.89	181.21	93.07	170.54		YDL157C	43.72	63.97	38.45	45.26	71.72	33.45	44.22	42.79	0	62.93	79.8	56.45	0	71.97	5.53	39.21	0	56.65	6.89	62.99	0	34.74	57.95
YDL158C	61.64	52.84	145.07	120.48	128.13	143.66	119.54	143.13	173.87	125.8	174.96	132.84	155.04	182.27	121.88	198.25	114.62	142.87	166.44	171.84	152.13	163.53	136.71	115		YDL158C	3.92	4.27	2.09	2.85	2.43	14.57	5.43	61.46	0	7.53	2.67	2.35	0	0	0	4.36	0	0	0	2.08	0	4.1	4.03
YDL159C-B	0	0	0	0	0	0	0	0	0	0	0	0	0	1.64	15.21	0	0	0	0	0	0	0	0	0		YDL159C-B	0	0	0	0	0	0	13.55	0	0	54.03	0	0	0	9.56	0	0	0	0	0	15.27	0	0	0
YDL159W-A	0	0	0	0	0	0	0	0	0	0	0	0	0	0	0	0	0	0	0	0	0	0	0	0		YDL159W-A	0	0	0	0	0	0	0	0	0	0	0	0	0	0	0	0	0	0	0	0	0	0	0
YDL159W	17.51	4.34	8.12	5.68	8.12	5.38	5.99	5.38	9.21	6.9	6.53	5.51	5.51	5.82	5.52	6.01	4.2	6.2	13.78	12.29	7.91	9.7	11.12	4.85		YDL159W	2.56	2.09	1.84	1.79	4.25	2.22	3.43	5.01	0	3.18	4.56	1.39	0.87	1.6	0	1.82	3.78	0	0.81	2.68	0	1.59	3.89
YDL160C-A	65.9	155.67	0	85.31	83.52	76.41	64.73	115.07	69.2	79.69	119.92	99.14	111.78	119.35	114.27	105.86	121.89	116.34	129.2	131.48	21.94	73.14	56.35	32.68		YDL160C-A	17.28	32.92	14.16	6.81	20.01	0	12.71	0	0	0	29.34	13.32	0	30.34	0	6.52	0	0	0	10.77	0	9.15	14.86
YDL160C	58.25	19.12	30.54	40.39	33.58	28.22	39.61	32.52	29.26	37.28	35.03	28.3	20.15	32.61	24.66	28.15	24.35	24	48.42	34.19	21.15	24.88	44.97	12.97		YDL160C	43.11	38.58	35.56	57.7	55.97	35.11	50.21	25.57	0	21.31	68.54	43.6	9.77	62.79	3.97	39.09	19.31	33.85	9.89	56.16	40.12	35.29	63.46
YDL161W	195.75	28.35	100.98	103.77	91.77	60.84	120.17	69.04	97.35	74.28	82.24	58.85	48.28	87.89	59.93	54.91	99.25	73.51	70.25	71	64.87	73.14	93.91	66.18		YDL161W	5.55	4.43	5.34	6.43	7.43	2.17	9.81	0	0	4.97	13.08	7.19	2.52	12.68	0	8.37	4.38	7.68	2.34	8.54	0	5.23	8.49
YDL162C	6.41	0	10.65	2.57	12.01	0.93	7.68	1.73	6.84	3.15	8.62	1.57	2.72	5.15	1.9	5.77	13.77	2.1	12.84	13.31	6.94	0	0	2.58		YDL162C	0	0	0	0	0	0	0	0	0	0	0	0	0	0	0	0	0	0	0	0	0	0	0
YDL163W	14.72	0	26.49	0	8.71	1.42	0	0	0	0	2.98	0	0	0	0	0	2.76	0	0	0	8.19	0	9.57	0		YDL163W	3.49	3.92	2.6	8.8	10.1	6.17	16.99	0	0	0	22.6	9.87	0	14.01	0	0	0	86.06	3.02	10.98	0	5.48	0
YDL164C	11.38	1.88	4.77	11.77	8	4.19	20.13	18.79	7.94	18.16	23.02	15.21	9.55	26.47	17.29	13.75	9.32	10.84	19.08	19.82	7.27	19.73	19.18	7.7		YDL164C	4.83	0.48	0.18	5.15	1.26	0.58	3.14	0	0	3.2	13.32	5.17	1.99	10.29	0	4.25	0	0	0.9	6.21	0	0.31	5.02
YDL165W	131.7	61.9	73.62	108.23	65.42	84.14	87.42	81.35	66.5	75.92	83.82	68.34	61.55	81.98	78.86	90	76.17	102.22	104.72	87.14	26.17	84.02	77.18	42.23		YDL165W	18.32	19.95	18.93	21.68	18.57	7.92	32.01	17.93	0	10.99	31.11	19.07	4.67	17.09	0	15.13	0	0	4.33	27.83	0	17.8	30.2
YDL166C	232.8	226.48	268.29	217.91	229.59	258.4	139.23	205.2	225.98	172.65	192.41	160.55	171.88	192.18	182.99	177.33	165.22	204.37	198.96	214.24	119.34	163.48	149.7	171.57		YDL166C	12.02	42.25	30.76	11.21	43.03	23.27	28.95	0	0	8.39	30.44	16.51	0	17.27	0	10.32	25.85	0	4.14	23.84	0	15.06	23.81
YDL167C	55.03	28.76	34.31	41.93	77.21	59.39	29.38	66.47	74.61	34.65	44.59	41.06	47.99	41.89	37.09	43.44	47.26	40.4	35.56	52.8	36.34	61.82	61.9	43.1		YDL167C	3.74	16.78	10.14	3.3	21.07	11.48	6.64	6.9	0	2.96	14.95	8.96	0.9	5.22	0.89	1.5	2.6	0	3.33	5.62	3.86	7.85	5.68
YDL168W	52.93	20.22	27.1	29.12	20.51	24.88	14.5	21.92	17.3	15.26	21.8	17.25	18.31	17.75	12.18	23.7	16.73	14.16	30.3	21.58	11.97	19	24.07	7.64		YDL168W	17.05	29.32	22.13	16.64	46.42	33.2	27.07	14.06	23.22	10.33	39.93	26.29	6.11	31.13	0.91	16.1	26.54	9.3	5.66	19.57	7.88	19.34	16.46
YDL169C	27.31	0	19.56	23.18	11.23	15.21	24.79	24.31	15.99	36.83	15.55	9.43	9.99	14.33	17.47	11.96	11.96	10.18	23.01	13.89	10.43	6.44	27.78	12.95		YDL169C	0.91	0.99	3.12	0.72	0.7	0	1.34	0	0	1.75	2.48	1.13	1.24	3.21	0	4.83	10.79	0	0	1.14	0	1.61	0.52
YDL170W	3.83	1.4	4.24	3.22	3.28	2.75	6.12	5.72	6.38	9.5	5.3	1.78	7.74	3.32	6.71	7.1	7.84	6.7	13.69	10.98	6.71	10.53	15.1	3.53		YDL170W	3.11	1.02	0.98	2.7	0	0.66	1.37	0	0	1.79	2.11	0.58	0.85	1.09	0	0.94	0	0	0	2.91	0	0.55	4.64
YDL171C	21.44	7.17	7.01	14.38	12.04	9.82	16.88	12.99	11.74	15.92	16.59	10.24	11.02	14.64	11.85	17.69	14.09	11.66	23.6	14.36	10.72	15.82	27.73	6.94		YDL171C	26.43	6.78	5.3	29.09	15.65	8.62	30.7	8.67	0	20.19	37.22	24.62	5.46	35.66	1.26	18.81	28.64	5.74	3.23	32.21	27.93	6.38	38.55
YDL172C	75.79	105.24	149.7	111.35	228.07	120.71	144.97	173	168.76	125.49	200.65	160.92	128.92	141.75	115.71	152.69	234.44	153.27	185.1	154.67	127.01	202.13	219.17	150.23		YDL172C	2.26	0	0	14.12	0.92	0	2.41	0	0	0	0	4.59	0.72	3.59	0	7.95	42.96	0	0.8	0	0	0	4.39
YDL173W	47.04	41.76	18.29	30.31	26.52	22.18	33.02	36.75	23.71	38.04	29.26	22.17	21.01	33.48	29.36	24.83	27.52	27.66	56.78	25.8	15.03	24.55	38.67	29.98		YDL173W	12.24	13.3	11.81	11.05	12.68	19.01	17.92	0	0	13.23	17.02	5.09	1.41	11.74	0	6.93	12.12	0	5.21	20.3	0	9.52	19.76
YDL174C	114.44	54.68	38.69	73.16	59.4	51.05	78.29	71.74	58.55	59.48	62.84	50.02	20.32	64.96	55.02	30.07	24.46	28.45	51.98	41.98	24.52	24.91	57.18	24		YDL174C	12.14	41.45	28.11	21.98	60.91	33.33	15.22	8.64	0	10.59	67.08	39.3	9.76	58.13	5.03	43.23	19.58	11.44	11.14	21.31	9.68	29.42	18.5
YDL175C	33.94	23.26	29.18	24.77	24.51	33.38	24.43	29.15	29.47	24.41	22.48	16	19.02	21.4	22.11	32.73	28.1	27.42	34.87	26.09	14.42	24.05	30.31	15.63		YDL175C	3.61	6.75	5.57	3.26	13.16	4.4	4.18	8.09	0	1.98	6.31	5.26	0.7	6.8	0	0.78	6.11	0	0	5.15	9.06	5.11	6.51
YDL176W	49.8	33.29	16.58	35.17	43.89	38.85	44.88	41.33	39.01	64.29	30.94	26.47	48.36	39.37	39.52	46.93	48.29	41.96	48.89	51.53	37.53	59.4	52.25	33.03		YDL176W	1.79	1.1	0.83	2.83	4.15	2.62	2.8	0	0	2.15	3.65	1.04	0.3	0.79	0	0.76	0	0	0.28	2.37	0	0.71	2.82
YDL177C	118.59	68.13	85.71	84.05	71.3	110.85	85	98.54	105.31	88.78	70.27	62.33	101.27	82.03	72.74	65.06	78.98	92.05	95.18	86.21	61.1	98.94	88.68	63.71		YDL177C	2.75	1.5	3.94	1.08	4.25	3.66	2.02	0	0	0	1.87	4.66	3.74	2.41	0	3.11	0	0	0	2.57	0	1.94	2.36
YDL178W	115.76	59.99	61.54	68.15	81.93	72.9	73.68	85.05	78.3	62.49	66.24	55.44	63.81	77.21	65.54	75.5	69.6	82.46	116.46	82.2	43.65	82.16	75.19	77.03		YDL178W	5.26	13.83	10.45	14.66	19.61	12.2	13.44	9.7	8.01	8.92	15.15	12.8	2.53	11.69	2.51	10.64	0	19.26	4.3	14.28	10.87	8.75	18.29
YDL179W	19.11	10.86	15.27	11.91	12.72	13.74	7.34	13	12.38	18.07	21.69	14.53	30.61	26.51	20.15	45.35	44.36	59.39	48.68	46.62	34.45	62.96	82.15	66.71		YDL179W	11.46	0	0.16	9.99	0.47	0	10.65	0	0	3.47	3.28	0.37	0	3.18	0	0	0	0	0	10.52	0	0.21	14.17
YDL180W	35.24	8.08	12.81	21.49	22.32	17.18	35.26	23.5	22.59	28.42	18.66	17.31	20.82	24.2	23.71	30.8	24.39	25.86	36.64	22.55	20.48	25.72	37.24	17.8		YDL180W	3.59	2.28	1.84	5.18	1.85	1.91	3.3	4.68	0	1.15	4.26	2.12	0.81	5.51	0	2.37	0	0	0	5.77	5.24	2	6.34
YDL181W	931.25	627.14	705.16	1476.2	1015.59	970.85	2728.6	1518.76	829.38	1027.33	1067.29	798.84	1163.97	1241.45	1318.09	1047.04	1515.17	1210.56	1142.19	1228.85	1352.2	1060.79	1175.38	1560.08		YDL181W	285.39	144.01	83.68	367.84	150.47	118.54	455.77	0	0	293.89	269.49	100.88	85.23	256.69	0	425.8	411.62	144.31	17.56	303.61	366.49	88.51	231.42
YDL182W	30.06	2.41	1.95	13.67	23.27	12.39	20.58	17.83	20.69	7.54	13.69	10.56	7.29	8.46	11.6	13.67	7.37	9.44	16.01	12.45	3.61	4.94	20.39	6.05		YDL182W	19.34	40.42	31.57	15.07	66.51	28.73	43.59	44.97	41.07	25.93	57.35	39.93	3.7	33.75	1.65	21.84	32.5	21.07	13.05	36.56	14.16	33.12	24.84
YDL183C	13.59	0	8.81	10.63	7.95	5	13.23	6.45	8.49	14.66	6.77	7.46	5.62	6.74	9.24	10.27	6.26	7.83	16.42	7.91	9.33	3.99	13.51	1.07		YDL183C	0	4.92	4.86	1.78	2.62	2.11	0.83	0	0	1.08	2.69	0.35	0	1.98	0	1.92	0	0	0	1.06	0	2	2.27
YDL184C	0	0	0	0	0	0	0	0	0	0	0	0	0	0	0	0	0	0	0	0	0	0	0	0		YDL184C	0	0	0	0	0	0	0	0	0	0	0	0	0	0	0	0	0	0	0	0	0	0	0
YDL185C-A	174.74	99.37	128.92	248.95	242.35	97.55	346.09	279.83	231.91	400.6	278.38	227.84	307.39	339.39	230.35	372.82	322.34	250.38	372.33	322.28	294.08	544.71	407.65	135.59		YDL185C-A	0	12.01	10.55	0	0	0	8.11	0	0	0	0	0	15.01	9.68	0	8.33	0	0	0	6.87	0	3.9	18.97
YDL185W	82.96	42.54	32.9	64.26	59.74	53.89	73.25	76.96	49.93	88.19	69.88	63.22	72.5	90.04	69.88	93.17	82.2	83.47	119.85	102.96	66.86	102.78	111.06	55.08		YDL185W	165.99	58.35	50.08	184.89	91.03	67.17	191.6	47.06	22.22	122.48	157.26	120.11	63.66	142.1	12.46	103.04	94.77	115.7	20.22	187.51	163.24	48.77	204.9
YDL186W	9.46	0	6.62	4.16	4.78	0.93	5.19	5.68	7.12	7.22	6.06	0.39	6.77	6.92	4.79	5.04	13.6	9.41	18.07	15.96	17.26	7.1	8.87	3.21		YDL186W	1.36	0.37	1.12	1.07	0	0.36	1	0	0	1.3	0	0.21	0	0	0	0.51	0	0	0	0	0	0.48	0.39
YDL187C	4.43	0	0	1.55	5.79	1.12	8.82	10.11	3.44	2.99	5.97	3.78	6.56	5.77	7.75	9.01	13.8	1.3	11.01	18.93	0	2.78	2.39	0		YDL187C	0	0	0.45	0	0	0	0	0	0	0	0	0	0	0	0	0	0	0	0	0	0	0	0
YDL188C	83.34	24.8	39.8	76.79	54.88	50.41	94.14	65.83	38.98	78.68	55.36	45.88	39.42	68.07	47.64	49.8	53.56	51.34	62.85	50.92	44.23	50.01	57.88	39.37		YDL188C	16.3	1.66	2.74	25.01	7.27	7.16	15.26	0	0	10.91	17.67	10.66	0.97	16.81	1.87	15.36	16.38	0	0.76	19.8	0	4.64	21.61
YDL189W	41.61	21.52	20.04	45.09	44.89	41	41.99	47.31	44.88	53.59	46.6	38.16	43.89	46.61	39.52	43.47	48.14	43.68	56.99	53.23	30.32	48.73	55.12	33.36		YDL189W	6.61	2.6	2.96	6.96	6.24	6.26	8.38	0	0	4.23	12.48	3.17	3	5.81	0	4.02	4.35	7.62	1.39	6.87	0	4.41	9.48
YDL190C	55.62	18.09	13.46	33.77	25.28	20.82	43.27	27.82	23.57	36.87	25.45	22.96	31.18	33.8	25.5	40.73	42.75	37.46	46.96	37.95	26.32	46.48	43.43	25.98		YDL190C	9.32	2.71	2.02	10.14	8.06	5.04	10.87	5.03	0	5.86	11.68	7.73	0.87	9.59	0	7.52	0	6.66	1.01	12.51	0	2.95	11.42
YDL191W	1686.72	2445.43	2193.44	2365.85	1853.42	2258.58	2340.52	2036.59	1690.28	1846.89	2496.1	2473.15	2062.75	2143.74	2247.77	1690.1	2009.09	2044.33	1513.47	1908.14	1509.94	2059.2	1849.63	2152.36		YDL191W	836.54	482.87	325.67	919.39	839.08	378.44	892.83	597.77	578.98	837.36	1044.76	607.84	299.54	743.5	79.97	713.5	996.26	354.74	230.97	878.4	1016.38	272.73	944.81
YDL192W	404.44	487.6	300.55	504.62	404.22	482.22	393.08	452.06	371.25	485	537.74	544.73	442.81	533.13	581.6	353	390.7	444.89	480.05	492.18	368.06	362.21	421.19	325.9		YDL192W	298.48	175.6	140.12	346.22	292.19	160.35	281.7	136.39	128.77	312.57	377.47	297.23	105.76	312.27	40.15	194.12	176.57	103.17	62.64	351.17	152.84	109.55	329.47
YDL193W	28.36	16.75	6.34	26.22	19.61	15.65	27.42	31.24	14.66	27.6	28.74	21.07	19.89	31.52	17.96	26.51	20.61	20.2	37.53	20.65	14.75	19.02	26.94	9.67		YDL193W	7.9	5.82	7.49	13.2	12.92	7.91	9.23	7.28	0	8.03	19.57	11.03	1.9	15.91	0	14.04	5.5	9.63	1.17	13.9	8.16	7.88	12.79
YDL194W	10.42	1.58	4.45	5.62	5.1	2.69	6.09	4.57	6.07	6.28	6.1	3.33	3.5	5.08	4.41	6.09	5.31	6.56	14.72	7.81	5.58	5.95	12.1	3.49		YDL194W	0.88	0.29	0.22	0.83	0.81	0.65	0.65	0	0	0	0.12	0.27	0	0.62	0	0.66	0	0	0	1.1	0	0.43	1.51
YDL195W	19.93	8.05	6.04	18.1	18.01	8.88	25	19.73	13.42	21.23	24.21	19.08	14.71	23.05	16.55	22.25	16.45	13.48	36.92	21.04	11.35	19	35.32	9.58		YDL195W	33.6	11.94	9.8	34.78	24.84	17.63	37.08	7.46	12.33	18.52	55.36	30.5	8.92	50.32	3.14	27.94	15.5	12.35	4.36	42.17	8.37	11.49	42.21
YDL196W	61.88	0	25.68	9.3	5.79	2.24	16.98	8.36	13.2	26.6	12.48	1.89	6.56	4.14	10.32	18.1	16.61	6.34	36.61	26.08	8.37	46.5	14.33	3.12		YDL196W	0	0	0.45	2.58	0	0	0	0	0	6.32	4.48	0	0	2.89	0	0	0	0	0	0	0	0	3.78
YDL197C	13.23	2.82	6.71	15.02	11.01	6.18	26.54	18.67	14.11	22.92	22.12	19.58	12.46	20.64	16.67	15.61	15.14	13.73	27.83	17.34	13.51	10.16	32.67	8.59		YDL197C	2.19	0	0.04	0.49	0.24	0	1.61	0	0	0.6	2.34	0.48	0.85	0.82	0	0.59	3.7	0	0.39	1.56	0	0	0.36
YDL198C	15.11	0	5.97	9.23	7.55	7.51	6.03	8.95	5.22	9.9	5.03	4.93	6.71	10.01	8.32	11.4	7.42	10.15	28.3	7.84	7.01	10.38	20.44	4.06		YDL198C	33.11	7.01	9.72	22.25	19.41	15.34	27.52	19.21	31.74	15.3	29.16	14.18	3.34	22.08	0	14.13	7.25	0	3.09	19.11	0	10.61	24.25
YDL199C	5.98	2.09	4.51	4.46	5.29	3.62	7.16	4.11	5.91	6.01	3.8	3.19	2.3	4.8	3.22	5.58	2.8	3.47	11.38	6.34	5.58	3.27	6.04	1.75		YDL199C	2.78	0.5	0.57	1.28	0.54	0.25	1.36	0	0	0	1.89	0.64	0	3.05	0	2.88	0	0	0.29	1.73	0	0.9	0.93
YDL200C	158.33	216.68	198.84	177.08	244.37	217.5	296.69	310.29	208.5	217.78	165.07	140.69	258.06	246.8	259.31	186.87	180.89	186.87	218.57	246.38	160.87	241.69	130.93	190.82		YDL200C	4.69	3.19	5.13	6.47	6.34	3.75	6.04	0	0	15.76	7.97	1.81	1.6	3.09	0	7.53	0	0	0	7.31	41.18	2.9	2.69
YDL201W	47.45	29.38	31.76	49.68	68.21	49.92	28.4	47.98	67.91	31.21	40.74	41.16	25.96	29.49	22.25	33.34	29.57	28.1	38.18	32.55	17.39	27.61	64.75	25.9		YDL201W	14.35	42.96	33.5	10.8	56.89	32.97	16.79	30.64	0	12.52	46.07	27.15	2.66	21.19	1.32	6.4	23.14	0	11.52	17.47	0	31.1	14.95
YDL202W	38.62	21.18	12.21	17.68	27.55	23.19	33.03	33.3	24.32	25.75	29.17	19.33	24.18	23.13	32.18	36.09	33.95	28.04	58.59	35.77	21.89	28.75	49.97	20.75		YDL202W	11.75	11.94	14.45	22.87	22.38	9.59	19.02	12.27	0	7.52	17.56	8.21	3.2	15.82	1.59	6.51	18.53	16.24	0.99	19.53	0	9.69	14.82
YDL203C	13.48	9.3	6.03	8.98	13.38	9.13	8.46	9	8.91	6.99	7.65	4.89	6.68	7.45	8.08	7.63	7.02	5.96	13.45	9.43	5.24	10.2	8.98	3.66		YDL203C	3.1	1.26	1.73	2.24	7.37	2.2	3.23	0	0	0.5	4.38	2.79	0.35	2.04	0	1.66	0	0	0.65	2.73	0	2.37	2.66
YDL204W	52.57	19.78	28.23	68.15	32.42	18.08	177.09	105.3	40.46	161.54	63.74	47.88	28.41	120.8	96.77	25.61	35.41	28.9	71.5	37.43	25.65	30.37	51.24	21.18		YDL204W	12.74	3.35	4.14	30.49	8.48	4.67	17.45	13.76	0	21.91	28.64	20.59	31.67	75.19	2.67	138.31	20.78	9.11	12.74	10.95	7.71	4.5	13.59
YDL205C	96.49	34.68	56.78	74.22	70.57	72.59	72.89	61.74	65.8	77.68	58.65	40.39	60.21	58.02	47.28	64.14	75.38	51	64.86	63.94	37.71	65.19	69.75	51.49		YDL205C	17.6	5.99	10.59	22.13	33.97	14.05	14.97	8.61	0	19	28.76	16.11	1.5	13.52	1.11	14.12	0	34.21	2.78	18.16	0	12.24	17.34
YDL206W	30.18	13.96	14.08	18.07	21.79	19.82	19.93	20.44	18.51	16.08	18.64	15.41	10.07	27.37	14.02	19.9	16.24	18.28	30.63	21.13	13.9	16.32	15.27	7.62		YDL206W	0.41	0.56	0.42	1.63	2.87	0.22	0.76	0	0	0	2.1	0.51	0.56	1.09	0	1.09	0	0	0.26	0.51	0	1.17	1.18
YDL207W	30.37	15.09	11.27	18.61	25.69	15.43	24.38	24.14	20.58	29.49	26.7	18.52	20	24.86	15.26	22.25	24.24	15.58	30.83	25.21	16.62	23.2	49.86	18.14		YDL207W	4.26	1.99	2.37	3.84	4.94	4.7	3.81	4.77	0	2.92	3.72	4.51	1.24	2.14	0.62	3.91	0	0	1.15	3.6	0	2.8	4.01
YDL208W	364.15	264.55	343.23	253.01	318.07	275.91	110.76	174.16	287.64	131.77	227.34	205.83	129.54	164.46	110.5	122.06	119.96	140.46	138.36	133.34	108.82	143.34	201.29	130.58		YDL208W	96.82	203.94	142.67	70.11	283.05	190.9	106.26	99.43	0	70.06	261.96	162.98	17.28	122.64	16.07	43.75	93.86	65.81	36.04	102.85	27.86	130.06	91.89
YDL209C	56.47	18.95	23.56	28.93	36.97	28.62	22.9	27.68	35.54	26.37	26.88	18.41	20.41	19.48	15.74	23.33	19.08	20.84	35.05	23.05	17.36	22.26	51.45	20.89		YDL209C	1.58	9.73	6.03	4.15	16.24	10.07	2.71	0	0	7.06	11.07	4.7	0	3.69	3.19	1.99	12.44	0	1.33	2.62	0	4.64	3.01
YDL210W	6.18	1.28	3.88	1.61	4	0.48	3.07	2.71	4.7	3.12	2.87	1.47	2.27	3.04	1.29	4.81	2.29	1.75	9.49	5.37	4.7	3.21	4.54	1.61		YDL210W	0	0.46	0.39	0	0.44	0.91	0	0	0	0	0.58	0.09	0	0	0	0.21	0	0	0	0.53	0	0.2	0.16
YDL211C	14.04	8.46	6.4	10.37	13.2	13.89	19.56	21.43	19.5	23.27	22.8	15.08	18.68	20.63	19.44	13.48	17.02	11.19	24.66	17.43	18.47	17.88	22.1	15.53		YDL211C	3.28	3.07	1.35	1.48	1.45	1.75	2.76	0	0	0.9	3.19	4.05	0.64	4.53	0	0.53	0	0	0.59	2.92	16.47	0.5	2.15
YDL212W	394.58	667.68	403.09	415.84	502.72	585.76	264.15	512.95	395.41	251.76	429.95	431.52	337.63	431.66	351.1	290.85	306.76	296.24	363.43	389.37	309.43	349.51	268.89	305.73		YDL212W	61.67	96.4	87.65	76.9	156.66	84.17	84.89	46.73	0	28.64	144.59	87.42	18.95	96.07	10.07	57.85	70.59	20.62	20.08	86.16	34.92	73.78	76.98
YDL213C	235.34	296.39	381.02	294.97	360.44	253.25	100.88	182.93	334.34	86.26	215.54	173.25	106.72	151.69	72.16	105.11	97.19	82.51	85.5	126.19	56.07	110.64	162.64	107.39		YDL213C	5.41	48.58	49.25	6.4	68.88	35.01	13.92	42.34	46.64	13.84	42.85	36.69	2.45	23.74	7.3	7.49	0	18.69	5.69	11.79	0	29.92	14.47
YDL214C	6.93	1.02	0.88	1.6	3.79	2.94	2.87	4.18	4.43	4.98	2.29	1.43	2.26	2.14	2.21	2.11	1.37	1.4	6.79	3.73	4.61	5.45	5.76	2.58		YDL214C	0	0.12	0.07	0.36	0.35	0.36	0	0	0	0	0	0	0	0	0	0.17	0	0	0	0	0	0.16	0
YDL215C	45.57	12.63	17.48	20.56	14.41	18.45	13.52	16.45	13.47	16.08	12.03	10.94	8.23	15.58	13.37	12.85	10.17	15.05	21.62	10.58	8.72	10.68	14.63	7.42		YDL215C	2.8	4.2	5.84	5.64	11.04	7.98	2.06	2.2	10.88	1.61	11.23	9.6	1.72	8.98	0.28	5.66	3.32	0	1.95	4.98	7.38	6.19	5.54
YDL216C	28.85	6.92	21.7	28.36	17.89	17.51	44.97	31.18	17.5	40.08	15.27	12.12	21.41	43.66	32.09	37.98	27.1	35.02	43.99	37.18	23.9	27.1	23.94	20.34		YDL216C	0.38	0.63	0.73	2.42	0.3	0.2	2.26	6.02	0	0.74	1.3	0.95	0.52	2.02	0	1.31	0	0	0	2.87	0	0.54	2.64
YDL217C	24.44	4.58	11.87	7.64	6.25	8.98	10.47	10.31	9.66	9.96	9.61	8.74	8.09	10.84	8.13	12.45	11.26	10.16	24.31	9.89	3.87	11.47	19.14	4.8		YDL217C	10.16	6.08	13.6	15.22	23.53	14.06	17.94	0	26.28	1.95	13.8	7.83	1.38	11.59	0	4.6	24.03	0	2.56	12.66	0	9.33	12.23
YDL218W	5.7	12.88	4.46	3.76	7.04	3.31	3.48	2.9	3.15	3.63	2.16	1.31	2.85	1.8	2.79	6.76	1.73	1.76	7.33	5.57	7.26	7.26	6.63	2.16		YDL218W	0.57	0	0.08	0	0	0	0	0	0	0	0	0	0	0	0	0.22	0	0	0	0	0	0	0
YDL219W	138.63	183.76	92.72	156.65	141.92	148.59	187.06	200.52	110.62	149.92	182.32	188.23	157.33	232.69	214.76	182.41	154.16	170.68	203.36	244.19	125.17	199.06	144.12	149.48		YDL219W	10.2	11.1	7.2	14.75	6.56	8.14	15.01	0	175.92	9.79	24.24	8.91	4.62	17.91	3.44	13.48	0	0	2.14	15.89	0	6.6	21.43
YDL220C	4.92	0.75	0.65	3.24	3.08	0.86	2.77	2.45	3.62	3.73	3.39	2.22	2.85	1.79	2.28	5.26	2.53	2.07	7.16	3.97	5.5	2.31	4.9	1.9		YDL220C	0.67	0.18	0.46	1.36	0.91	0.54	1.11	0	0	0.32	2.62	0.9	0	1.62	0	1.22	0	0	0.21	2.09	0	0.47	1
YDL221W	13.64	11.02	4.77	12.02	18.34	12.48	18.76	14.69	10.95	15.76	17.68	14.71	24.27	26.08	15.28	19.48	22.19	18.3	27.22	18.7	6.43	26.29	25.42	10.41		YDL221W	0	0.66	0	2.61	0	0	0.9	0	0	0	0	0.97	1.66	2.15	0	1.7	0	0	0	0	0	0	1.82
YDL222C	6.93	7.98	3.45	10	3.11	3.42	56.42	37.83	8.57	53.8	7.45	5.08	7.05	19.66	37.83	9.48	7.14	9.09	27	8.99	4.5	4.17	5.56	3.35		YDL222C	17.72	2.25	2.18	16.77	3.65	5.34	22.59	0	0	44.2	13.64	7.47	25.71	65.34	0	186.43	6.98	0	16.39	9.57	0	5.84	5.76
YDL223C	8.7	1.32	2.57	10.63	7.35	4.09	59.65	28.85	12.93	43.99	8.52	8.5	5.4	22.12	25.28	7.63	5.18	4.91	20.32	8.13	4.84	9.52	8.72	3.89		YDL223C	14.67	1.68	2.19	6.6	1.36	2.97	9.72	0	0	9.29	5.38	7.65	13.58	17.26	0.3	47.6	1.74	15.21	2.78	13.99	0	1.5	9.93
YDL224C	5.21	3.33	3.84	4.52	7.37	3.27	6.58	8.13	5.8	5.97	6.22	4.53	4.17	4.34	5.92	7.4	3.73	4.55	14.33	6.9	5.01	8	13.4	2.33		YDL224C	6.41	2.15	3.57	6.61	10.47	4.72	9.25	0	0	4.73	9.55	4.33	1.34	6.49	0	4.47	2.92	5.11	0.93	11.37	0	3.83	8.48
YDL225W	71.11	30.7	50.8	55.87	54.69	55.94	49.68	50.93	62.01	47.83	41.32	33.49	49.25	54.71	39.3	45.57	48.37	58.83	53.81	46	29.72	55.61	56.05	35.03		YDL225W	6.22	15	10.44	9.12	15.1	8.52	6.98	18.56	0	1.71	15.09	8.13	2.02	9.89	2.4	6.6	0	6.14	2.62	12.55	5.2	7.54	11.72
YDL226C	23.86	13.57	11.74	23.84	31.77	16.56	35.74	31.84	30.91	44.28	48.15	28.52	29.48	43.19	32.5	39.45	39.46	33.8	50.84	44.62	20.4	36.83	61.12	38.93		YDL226C	25.6	10.11	9.26	28.51	22.09	12.82	36.56	7.86	0	18.3	30.35	19.2	6.15	29.53	1.02	14.22	5.94	10.41	1.27	25.65	26.43	10.11	27.05
YDL227C	2.92	1.25	1.62	1.17	1.46	1.5	0.52	1.05	3.6	1.75	1.05	1.27	0.28	0.52	1.64	2.34	3.34	1.6	5.08	1.68	4.56	3.9	1.4	0.78		YDL227C	0	0	0.04	0	0	0	0	0	0	0	0	0.09	0	0	0	0	0	0	0	0	0	0.1	0
YDL228C	275.79	130.37	115.73	223.65	149.97	170.21	150	136.67	130.36	104.21	165.34	160.82	79.87	153.72	90.66	144.45	123.58	149.13	143.13	130.51	54.15	115.15	223.45	96.88		YDL228C	290.66	204.59	98.59	302.12	312.01	142.59	297.52	156.72	228.21	198.86	423.07	245.92	53.36	284.21	38.13	197.55	234.16	195.69	69.1	295.15	233.1	127.23	305.06
YDL229W	46	20.3	2.39	20.3	20.27	11.77	19.05	23.93	14.97	15.13	32.48	22.3	12.15	19.93	15.61	18.67	10.16	6.91	32.46	19.53	4.83	15.28	29.47	5.24		YDL229W	320.61	219.85	165.9	309.76	394.63	293.01	394.03	266.32	135.2	324.94	547.54	446.72	110.77	455.27	51.46	254.61	293.84	384.83	94.27	348.59	341.11	161.28	332.82
YDL230W	25.36	4.81	9.36	21.33	18.76	13.98	29.99	23.69	16.83	20.92	18.86	17.76	12.75	24.46	17.83	15.78	17.21	14.37	28.5	13.32	15.58	12.8	28.62	9.59		YDL230W	4.8	4.65	4.3	4.21	8.24	7.1	3.93	0	0	1.02	9.06	4.11	2.18	8.43	0	6.85	0	0	1.35	5.98	0	3.77	6.12
YDL231C	13.71	7.95	6.61	9.58	10.03	10.72	9.35	10.08	10.47	9.86	9.43	6.7	8.11	9.47	9.64	10.73	8.49	10.24	17.7	10.58	7.59	11.88	12.6	4.88		YDL231C	0.14	0.22	0.07	0.43	0.63	0.22	0.4	0	0	0.26	0.55	0.38	0	0.12	0	0.31	0	0	0.17	0.08	0	0.19	0.16
YDL232W	0	0	0	0	0	0	0	0	0	0	0	0	0	0	0	0	0	0	0	0	0	0	0	0		YDL232W	0	0	0	0	0	0	0	0	0	0	0	0	0	0	0	0	0	0	0	0	0	0	0
YDL233W	8.39	8.25	9.28	9.13	8.05	5.98	10.98	11.39	7.52	7.82	9.25	6.94	6.93	8.52	7.91	10.53	7.76	7.05	19.58	10.49	6.05	6.72	14.08	5.2		YDL233W	2.93	2.99	3.1	5.49	4.53	2.34	6.74	0	0	2.81	3.98	2.6	0	3.54	0.74	4.15	0	0	1.85	5.71	6.43	1.94	3.99
YDL234C	32.5	17.14	18.12	27.54	25.09	26.9	32.48	32.45	25.3	31.45	26.68	20.14	18.31	28.94	28.04	29.48	28.98	33.51	37.04	30.37	18.52	24.16	34.93	18.59		YDL234C	4.44	3.91	4.22	4.17	5.71	3.49	2.8	0	0	3.25	4.45	2.67	1.15	4.46	0.43	4.79	0	4.38	1.07	5.14	0	3.36	3.27
YDL235C	163.62	102.02	102.03	120.47	85.84	109.79	86.18	96.06	77.24	76.71	83.06	73.91	78.9	92.45	87.21	84.33	57.06	81.69	103.43	70.66	55.71	81.89	69.75	46.85		YDL235C	21.23	28.51	21.85	25.68	54.64	36.91	24.99	0	0	27.16	37.49	32.74	0	26.1	5.73	20.31	66.96	29.35	5.36	36.16	0	20	30.83
YDL236W	125.63	78.84	57.96	100.68	69.74	94.27	92.62	110.64	64.84	77.02	90.56	82.35	64.46	93.06	62.14	79.87	71.14	77.44	91.74	78.49	35.55	81.5	99.78	53.52		YDL236W	25.67	26.68	29.49	37.74	42.34	44.71	33.48	18.27	0	33.59	66.97	41.56	10.32	47.13	9.45	24.45	20.7	60.48	11.04	29.08	10.24	26.17	34.78
YDL237W	17.95	2	6.91	13.55	9.35	9.95	20.34	21.37	8.21	15.84	21.26	11.95	6.62	14.75	18.98	14.98	10.72	9.04	33.71	13.49	7.88	9.38	21.2	4.61		YDL237W	14.63	8.93	11.14	15.03	15.74	12.97	18.91	6.94	0	14.46	24.69	15.17	7.24	14.79	2.69	19.08	5.24	0	3.91	17.4	7.78	9.55	15.24
YDL238C	6.58	4.59	2.65	2.72	1.79	1.5	6.04	3.66	3.23	5.87	3.43	1.56	1.69	4.05	3.07	4.16	2.74	1.96	8.56	2.89	3.02	3.83	4.43	2.25		YDL238C	0.34	0.74	0.42	1.07	1.84	0.54	3.25	0	0	1.3	1.15	1.05	1.85	1.79	0.69	2.31	0	0	0	2.12	0	0.84	1.75
YDL239C	11.07	4.47	8.12	13.45	9.25	13.65	27.06	21.03	11.63	14.77	13.03	12.53	10.48	22.57	12.93	14.77	15.81	14.44	23.68	15.23	12.35	13.73	15.4	10.7		YDL239C	0.2	0	0	0	0	0	0.15	0	0	0	0	0	0	0	0	0	0	0	0	0	0	0	0
YDL240C-A	466.94	0	310.06	74.84	0	108.28	74.54	0	79.68	0	0	91.32	158.41	0	55.4	201.74	160.39	183.71	272.03	193.77	0	449.15	0	0		YDL240C-A	0	0	0	0	0	0	0	0	0	0	0	0	0	0	0	0	0	0	0	0	0	0	0
YDL240W	5.06	0.68	4.12	2.56	1.2	2.52	2.83	2.4	2.73	3.57	3.24	2.08	3.01	2.75	3.21	5.37	3.5	3.14	10.79	4.88	6.34	3.84	6.47	1.57		YDL240W	2.12	0.49	0.62	2.27	2.33	1.53	1.67	0	0	0.29	1.64	1.07	0.62	1.46	0.31	0.63	1.79	0	0.19	2.92	2.65	0.69	2.6
YDL241W	4.39	0	0	8.21	2.19	5.09	1.17	1.58	2.5	5.75	9.45	5.73	2.48	9.4	3.47	6.33	7.54	6.72	14.93	9.11	6.34	3.52	7.23	2.36		YDL241W	0	1.36	3.75	3.94	11.56	0	7.34	0	0	0	10.17	1.54	0	6.57	0	1.88	0	0	0	1.55	0	0.88	7.15
YDL242W	9.81	0	5.43	0	0	2.84	5.22	3.53	0	3.21	3.51	0	0	1.75	0	8.24	2.81	4.29	13.09	3.39	3.54	0	6.06	2.63		YDL242W	0	0	0.76	0	0	0	0	0	0	0	0	0	0	0	0	0	0	0	0	0	0	0	0
YDL243C	28.17	12.94	8.21	12.59	11.71	14.29	11.28	10.43	10.16	13.41	12.9	6.35	12.02	11.27	9.45	17.59	23.39	25.07	19.18	13.55	16.04	17.59	18.19	7.4		YDL243C	0	0	0	0	0	0	0	0	0	0	0	0	0	0	0	0	0	0	0	0	0	0	0
YDL244W	4.83	0	3.43	0.79	2.23	0.58	0.65	1.09	2.91	1.1	1.4	1.26	3.29	1.44	1.02	4.28	1.41	1.33	4.21	2.44	4.08	3.96	1.51	0		YDL244W	0	0	0.29	0	0	0.14	0.48	0	0	0.5	0.53	0	1.43	1.38	0	0	0	0	0	0	0	0.14	0
YDL245C	9.44	0.65	1.97	1.62	5.02	2.05	7.63	3.64	9.33	3.08	4.99	1.65	2.61	2.67	4.3	7.13	3.41	4.29	22.19	4.15	11.3	3.17	4.28	2.74		YDL245C	0	0.31	0.35	0	0	0	0	0	0	0	0	0	0	0	0	0	0	0	0	0.09	0	0.05	0
YDL246C	3.76	0	2.4	0.81	3.25	0.34	0.58	1.41	0	2.13	0.93	0.14	1.72	0.15	1.29	2.81	4.97	1.8	4	3.9	8.49	2.78	2.15	0.93		YDL246C	0	0	0	0	0	0	0.18	0	0	0.47	0	0	0	0.22	0	0	0	0	0	0	0	0	0
YDL247W-A	0	0	0	0	0	0	0	0	0	0	0	0	0	0	0	0	0	0	0	0	0	0	0	0		YDL247W-A	0	0	0	0	0	0	0	0	0	0	0	0	0	0	0	0	0	0	0	0	0	0	0
YDL247W	8.39	0	4.11	0	4.65	2.07	0	5.04	4.14	0	4.87	0	0	0	3.04	7.14	0.53	0	16.85	0	8.74	6.35	7.48	0		YDL247W	0	0	0.22	0	0.2	0	0	0	0	0	0	0	0	0	0	0	0	0	0	0	0	0	0
YDL248W	52.82	12.56	17.33	38.1	26.58	20.83	29.19	29.46	23.97	33.39	23.59	20.35	15.38	39.42	24.74	22.33	27.3	33.52	33.2	29.62	13.66	10.77	16.46	18.06		YDL248W	7.99	2.73	2.76	9.48	4.3	6.25	8.73	0	0	10.1	15.42	2.74	0	10.06	0	8.02	0	0	2.14	3.08	0	6.43	2.56
YDR001C	41.63	8.51	13.08	38.69	27.67	21.63	57.89	39.54	24.27	32.19	37.34	25.89	15.78	49.82	30.9	32.46	27.92	29.2	49.77	26.32	15.46	21.92	43.65	16.26		YDR001C	13.64	5.26	7.74	21.85	22.96	16.64	16.98	13.15	10.86	18.53	30.08	19.03	9.71	36.3	0.43	42.94	22.34	8.7	3.97	18.44	3.68	10.53	16.36
YDR002W	973.46	1600.76	1144.83	1195.6	1757.4	1353.88	925.5	1075.79	1416.27	974.17	1078.91	1034.72	1071.63	913.27	892.79	669.6	848.77	715.04	703.02	986.02	890.22	1086.65	744.89	894.77		YDR002W	123.04	214.25	146.06	169.86	315.27	164.27	184.95	132.89	274.47	160.82	239.19	191.35	44.74	162.98	17.19	131.78	87.81	87.96	53.53	141.44	130.31	126.63	166.6
YDR003W-A	0	0	0	0	0	0	0	0	0	0	0	0	0	0	0	0	0	0	0	0	0	0	0	0		YDR003W-A	0	0	0	0	0	0	0	0	0	0	0	0	0	0	0	0	0	0	0	0	0	0	0
YDR003W	93.97	53.77	23.26	52.86	41.09	35.53	69.41	62.46	33.86	51.04	53.98	51.37	23.76	56.22	54.36	46.65	39.1	41.34	73.54	42.99	26.52	29.48	75.69	31.04		YDR003W	6.96	10.83	13.05	15.69	13.06	17.47	16.83	0	0	5.73	8.11	9.51	1.35	8.73	0	15.4	0	20.62	1.25	8.68	0	13.35	9.12
YDR004W	81.94	34.49	43.33	57.78	55.44	50.11	63.18	58.05	55.49	74	47.62	39.33	52.62	54.27	55.72	49.15	49.24	50.22	64.66	55.05	39.81	61.74	53.91	36.9		YDR004W	2.19	2.58	0.85	3.16	1.69	0.58	1.34	0	0	0.7	1.98	1.8	1.49	1.92	0	1.79	4.31	0	0	1.59	0	1.03	2.09
YDR005C	114.24	94.39	97.8	123.16	93.62	124.14	115.3	124.59	81.73	88.84	80.43	74.64	76.9	107.19	113.2	84.66	76.98	96.74	102.41	95.66	57.09	81.92	76.24	75.13		YDR005C	7.42	8.79	8.29	9.99	15.16	9.99	7.07	6.84	0	1.68	15.71	8.35	1.19	11.5	0	5.11	0	0	4.41	9.52	7.66	7.86	5.5
YDR006C	30.11	22.5	16.1	17.33	20.28	21.97	24.76	22.72	23.54	19.76	19.99	15.22	16.63	14.71	18.22	17.9	12.32	12.92	24.06	16.14	10.71	19.93	28.45	14.49		YDR006C	5.17	9.09	8.42	5.84	16.09	6.69	4.18	5.39	0	1.98	8.77	5.04	0.23	5.29	0	4.49	0	0	1.52	6.87	6.04	6.69	5.43
YDR007W	76.98	45.89	28.15	50.12	44.42	43.24	61.93	60.58	45.26	44.82	45.38	36.86	49.24	39.59	50.36	36.33	37.58	43.69	65.63	38.06	42.41	39.96	61.94	30.25		YDR007W	10.54	3.19	4.88	17.41	9.22	2.98	7.59	0	0	3.83	2.76	4.41	1.23	2.64	0	7.71	10.73	0	1.14	9.57	0	2.88	11.9
YDR008C	292.24	137.78	315.78	214.32	252.83	211.47	252.99	231.83	218.01	231.34	196.6	120.89	244.41	182.8	178.43	224.65	225.78	195.41	196.2	197.23	137.66	263.61	246.51	227.6		YDR008C	15.28	2.38	2.17	5.97	1.82	8.8	11.77	44.48	0	31.61	12.57	6.34	0	9.19	0	11.24	0	0	0	8.96	0	1	14.83
YDR009W	9.1	2.85	2.47	2.98	1.95	1.62	5.04	3.01	3.17	5.11	2.6	0.36	2.21	2.58	2.42	3.74	2.55	2.31	8.39	3.66	4.42	4.91	3.21	1.2		YDR009W	0	0.52	0.39	0.75	0.98	0.51	0.47	0	0	0.61	0.21	0.59	0	0	0.64	1.08	0	0	0.4	1.38	0	0.45	0.54
YDR010C	7.56	0	0	6.06	8.5	1.1	1.51	2.04	8.06	9.29	6.1	0	0	6.07	3.36	12.25	0	1.24	15.14	3.92	20.45	9.09	0	6.09		YDR010C	0	0	0	0	0	0	0	0	0	0	0	0	0	0	0	0	0	0	0	0	0	0	0
YDR011W	27.82	13.09	8.01	26.49	30.92	16.37	23.38	21.81	28.75	15.08	32.57	19.44	13.07	15.86	12.8	19.31	14.75	14.42	27.16	12.94	9.67	16.97	29.49	7.39		YDR011W	14.13	12.01	6.33	12.49	44.7	14.35	16.74	9.42	5.19	10	41.53	26.64	4.36	20.15	2.03	19	13.04	6.23	4.17	11.18	15.83	12.75	19.16
YDR012W	132.76	52.58	25.64	99.92	77.74	59.88	108.12	98.17	57.81	98.95	119.81	99.4	80.21	114.86	68.23	109.16	94.41	87.98	110.56	98.25	45.79	83.24	188.21	57.31		YDR012W	313.09	128.91	72.99	306.88	229.85	149.83	356.93	293.73	0	270.9	490.29	236.93	81.63	373.68	18.91	252.31	249.55	202.32	53.58	325.59	63.85	87.88	328.85
YDR013W	63.33	36.35	27.51	57.87	47.87	54.56	68.97	87.01	35.85	69.2	74.47	59.04	82.33	110.22	93.4	71.18	55.91	72.96	100	83.51	32.02	68.32	54.83	32.43		YDR013W	3.03	2.75	3.72	7.16	4.67	0.54	3.71	15.8	0	0	4.11	4.98	0	10.63	0	6.09	0	0	0	8.17	0	3.56	5.78
YDR014W-A	9.39	0	0	0.7	3.18	1.52	4.18	0.94	5.96	9.44	1.05	1.71	4.45	1.25	3.11	8.15	4.5	4.01	13.99	2.72	20.79	6.3	4.32	2.82		YDR014W-A	0	0	0	0	1.15	0	0	0	0	0	0	0	0	0	0	0	0	0	0	0.93	0	0	1.71
YDR014W	28.16	13.37	13.01	29.78	18.48	16.58	39.51	28.72	21.55	45.36	24.98	22.15	32.01	39.77	39.79	27.81	31.42	25.61	29.39	32.23	24.19	33.86	20.26	18.95		YDR014W	0.74	0.94	0.24	0.59	0.95	0.26	0.91	0	0	0	2.02	0.84	0.67	2.82	0	1.12	0	0	0	0.92	0	0.61	1.56
YDR015C	6.66	0	0	0	4.53	0	0	0	0	0	5.04	0	0	3.79	0	0	0	0	0	0	0	0	0	0		YDR015C	0	0	0	7.14	0	0	0	0	0	0	0	0	0	0	0	0	0	0	0	0	0	0	0
YDR016C	140.86	157.7	126.66	218.71	101.1	153.12	227.19	203.01	82.62	345.99	290.32	157.83	363.38	301.5	278.53	287.38	246.96	271.32	395.36	325.76	209.54	282.28	250.08	260.12		YDR016C	20	2.72	4.78	39.45	27.03	0	51.51	0	0	28.79	13.59	10.8	0	21.96	0	11.33	59.15	0	0	18.7	0	3.53	25.8
YDR017C	37.48	26.33	25.06	26.11	37.25	27.84	25.32	30.87	34.9	31.43	26.83	20.96	22.55	24.6	23.15	25.38	19.59	23.67	33.1	24.82	15.03	29.49	43.53	16.17		YDR017C	3.51	9.63	8.51	4.84	10.83	3.81	3.33	0	0	1.12	5.06	4.01	1.39	5.39	0.3	3.26	1.73	6.06	1.84	4.55	5.13	5.21	5.95
YDR018C	14.05	0	7.63	10.85	7.27	6.51	19.16	14.63	7.84	24.59	6.59	6.99	9.53	12.3	13.79	8.46	10.53	10.05	17.85	7.68	5.53	7.37	9.78	3.7		YDR018C	0.87	0	0.06	0.69	0	0.23	0.96	0	0	0	0	0.54	0	0.38	0	0.82	0	0	0	0.54	0	0	0.25
YDR019C	30.28	11.62	20.94	8.29	14.74	16.24	11.08	13.09	17.65	13.63	7.87	4.19	17.98	5.67	17.21	25.07	22.53	21.84	99.77	28.79	26.75	26.7	32.1	48.39		YDR019C	7.74	1.17	1.88	25.78	0.66	0	2.85	0	0	1.65	1.17	0.8	1.17	0	0	1.46	0	0	0.54	1.88	7.55	0.61	3.7
YDR020C	98.29	50.56	82.42	80.39	71.34	86.94	47.31	69.55	66.57	47.29	53.94	36.66	66.18	52.05	49.89	49.98	49.6	62.46	56.82	70.96	33.98	41.42	48.81	44.91		YDR020C	2.59	7.99	7.66	3.41	14.66	8.73	7.62	0	0	0	8.21	6.92	1.17	2.27	0	1.3	0	0	1.09	6.46	15.15	5.18	5.94
YDR021W	127.55	50.51	64.7	62.67	72.4	96.69	30.5	54.71	70.17	41.27	34.29	31.43	46.79	26.27	38.88	33.89	35.64	38.17	33.54	44.9	18.62	45.03	37.82	28.14		YDR021W	2.16	10.1	8.25	3.06	14.98	10.1	4.44	0	0	1.66	4.69	7.71	1.76	4.17	0.87	0.49	0	0	3.81	5.64	0	9.14	2.23
YDR022C	38.77	19.84	40.77	39.36	29.04	25.85	78.92	47.5	50.17	71.11	28.49	22.12	43.85	51.86	67.85	49.33	63.26	68.22	60.71	59	27.97	49.73	66.25	38.53		YDR022C	1.1	0	0.6	4.34	0	0	7.29	0	0	2.11	2.99	0	1.5	0	0	5.82	0	0	1.39	4.12	19.33	0.78	6.94
YDR023W	252.26	153.62	160.44	248.73	153.37	176.48	167.36	142.67	132.4	139.51	167.79	133.44	128.55	196.39	146.36	143.63	146.61	167.92	155.95	145.1	100.88	159.21	148.28	115.27		YDR023W	90.7	83.75	62.69	128.49	115.67	58.5	120.91	39.77	28.16	87.03	157.7	123.17	37.02	112.12	11.02	97.95	68.65	37.61	20.14	140.38	63.67	52.66	146.82
YDR024W	7.94	0	0	1.41	0	1.02	5.64	3.82	5.27	5.2	1.9	2.59	8.98	4.72	4.71	6.99	6.06	4.63	12.21	4.58	1.91	4.25	1.09	2.85		YDR024W	1.5	0.82	0	0	0	0	0	0	0	0	1.02	0	0	0	0	0	0	0	0	0.94	0	0	0
YDR025W	389.9	236.32	220.09	377.87	453.83	304.59	485.94	373.93	415.83	352.04	495.44	532.72	265.25	405.72	341.35	315.45	395.01	346.42	347.36	363.77	215.12	342.41	908.52	338.5		YDR025W	806.86	615.72	353.19	821.17	781.08	459.06	810.08	573.47	246.42	529.65	1104.08	759.15	265.68	853.69	62.82	625.37	600.85	780.62	193.04	836.1	1130.42	296.77	789.56
YDR026C	64.42	21.84	36.66	39.96	51.88	37.44	43.54	32.74	54.81	40.28	32.21	26.67	27.25	32.77	30.37	34.22	39.94	44.11	47.4	33.33	22.45	39.03	56.62	28.85		YDR026C	0.86	0.62	1.36	2.02	4.84	2.58	1.88	0	0	0	4.45	2.37	0.78	3.25	0	1.4	0	0	0.36	1.6	0	1.11	2.29
YDR027C	37.52	16.53	15.32	28.43	21.65	20.98	32.98	25.49	22.65	37.47	22.16	13.23	20.87	31.49	28.04	35.58	32.22	37.04	46.36	28.61	17.97	29.83	28.87	18.17		YDR027C	2.27	0.95	0.62	4.27	0.94	1.12	2.96	0	0	2.68	3.56	1.29	0.95	2.45	0	2.57	0	7.24	0.22	3.48	0	1.11	4.01
YDR028C	33.38	8.88	18.91	23.33	22.27	17.03	34.46	26.27	21.49	28.86	25.27	16.54	16.61	25.72	21.75	24.68	22.93	25.27	39.93	24.19	17.33	22.48	33.75	17.64		YDR028C	4.4	1.98	1.76	10.41	8.78	4.12	6.92	7.13	0	4.95	12.05	5.89	1.24	7.46	0.31	7.27	3.59	3.14	0.57	10.11	0	4.23	10.43
YDR029W	41.49	16.77	29	63	45.8	34.18	87.15	75.54	44.72	92.26	65.75	57.66	40.75	79.46	68.66	84.92	63.76	48.69	124.05	129.14	61.43	94.53	64.73	77.43		YDR029W	0	6.08	3.05	0	0	0	0	0	0	0	0	0	0	0	0	1.41	0	0	0	2.32	0	0	2.13
YDR030C	34.88	4.41	17.18	20.73	10.62	18.11	26.76	21.75	11.77	30.69	11.13	9.93	21.78	18.05	25.01	30.49	26	27.89	27.63	27.24	21.15	18.43	16.09	13.28		YDR030C	0.65	0	0.8	1.55	1.51	0.35	2.16	5.11	0	1.25	0.22	0.91	0.89	1.15	0	0.86	3.86	6.77	0	2.03	0	0.23	1.68
YDR031W	213.88	221.26	362.61	328.21	252.21	327.14	343.84	467.31	205.78	374.08	399.64	277.39	357.66	363.65	421.13	421.62	367.34	315.31	532.42	434.35	311.82	353.84	281.02	398.48		YDR031W	5.17	12.67	15.54	34.67	9.98	15.13	15.22	0	0	29.77	10.54	7.17	3.52	15.89	0	22.45	0	0	6.52	9.66	0	11.87	20.75
YDR032C	46.46	4.89	19.02	41.83	5.72	14.76	71.63	52.29	18.46	59.41	28.75	20.54	17.27	36.78	53.62	40.79	20.77	36.73	76.94	31.04	17.9	13.78	37.73	25.64		YDR032C	177.89	39.57	42.38	158.3	58.62	36.37	205.89	16.99	56.14	189.44	103.15	79.61	84.12	103.81	10.98	224.05	76.97	112.44	10.95	170.32	152.29	31.03	146.12
YDR033W	287.14	94.19	176.14	274.48	136.08	198.19	169.9	169.53	142.01	217.29	256.46	255.18	199.67	237.05	178.8	190.29	318.33	335.48	287.59	217.06	236.76	207.31	333.34	253.29		YDR033W	502.74	106.98	133.31	598.64	191.12	163.85	571.96	123.89	116.97	326.45	610.3	405.97	122.24	448.52	26.32	202.71	394.3	585.76	56.32	487.18	743.56	121.75	739.59
YDR034C-A	1820.47	3568.18	2616.59	2526.34	3904.74	3343.95	3531.99	5526.51	4396.7	3772.42	4237.1	4386.97	7678.63	3633.35	4974.96	5747.93	6498.42	4910.77	5183.14	5408.82	4678.62	6074.28	5141.19	3647.5		YDR034C-A	172.19	262.5	207	271.62	239.28	73.31	152.02	0	0	132.18	210.31	159.29	93.71	211.66	0	182.06	0	0	43.45	193.13	0	121.64	335.59
YDR034C	33.21	13.42	13.15	20.73	24.78	22.43	28.09	29.22	26.74	29.08	22.93	18.57	28.66	32.42	26.54	38.01	36.62	36.29	37	36.26	15.63	29.42	37.42	17.65		YDR034C	3.18	1.51	1.11	3.76	5.83	1.27	2.19	3.11	0	1.14	4.45	2.94	0.27	4.01	0	2.92	2.35	4.12	0.5	4.08	0	1.96	4.55
YDR034W-B	285.46	939.21	406.18	326.8	244.33	307.34	1757.59	1586.88	382.72	1041.73	263.11	398.78	760.91	916.52	2273.96	234.92	70.04	481.32	623.64	380.76	0	196.13	50.37	394.33		YDR034W-B	833.97	227.02	370.27	274.11	482.87	369.85	306.77	0	0	933.62	236.02	107.15	189.1	671.22	0	1417.09	0	0	0	173.22	0	245.46	159.35
YDR035W	86.75	38.3	40.49	51.31	78.05	48.69	45.13	65.61	59.12	50.11	64.08	46.89	42.78	55.47	36.34	43.91	32.37	33.08	62.17	54.63	29.39	53.31	72.23	36.18		YDR035W	28.34	72.52	55.81	43.59	88.24	50.27	39.27	29.59	0	29.01	79.88	57.24	4.5	64.7	4.78	29.96	27.93	29.38	16.69	45.03	24.87	43.21	46.03
YDR036C	10.68	7.46	4.51	8.56	10.48	8.67	11.47	9.03	11.44	9.35	8.56	6.08	6.59	8.32	7.61	8.81	9.01	7.77	18.96	13.3	10.51	7.47	16.79	4.38		YDR036C	7.28	4.51	4.07	11.75	11.5	6.17	14.13	0	0	5.08	13.04	7.86	0.9	7.85	2.68	7.13	3.92	6.86	1.25	14.03	23.24	4.91	12.15
YDR037W	167.54	114.69	74.67	98.61	136.19	122.46	94.23	112.86	123.76	89.17	118.67	108.08	98.64	121.55	94.43	124	124.42	130.51	126.81	132.66	87.24	149.11	167.05	82.58		YDR037W	88.42	102.54	81.56	104.52	140.54	82.9	102.11	51.45	99.17	67.77	161.21	127.89	23.09	118.98	9.98	61.3	74.47	45.4	20.72	119.06	57.65	63.33	118.63
YDR038C	16.49	0	7.23	4.68	6.81	4.19	4.76	5.78	7.78	5.31	7.41	6.6	2.42	4.95	6.85	7.82	4.38	6.31	9.82	8.14	6.68	4.05	5.54	2.24		YDR038C	5.19	4.2	2.81	6.64	6.14	1.49	6.3	2.93	1.21	8.89	4.66	2.76	0	11.16	0.85	1.1	0	0.97	5.66	6.56	0.82	1.73	5.37
YDR039C	36.81	37.92	36.31	18.56	22.71	19.58	8.93	19.31	28.63	14.35	16.93	12.7	14.66	12.75	3.05	17.75	13.02	13.74	30.71	19	22.2	20.94	27.14	16.44		YDR039C	5.19	6.41	6.41	3.15	23.37	11.88	10.37	2.93	1.21	0	22.96	15.72	2.48	2.79	0.85	6.65	6.64	0.97	0	5.55	0.82	8.7	5.69
YDR040C	34.55	9.48	8.39	22.22	34.85	27.2	23.43	23.94	19.29	21.43	24.35	19.26	12.81	27.51	21.89	18.12	23.18	15.47	23.45	22.4	11.55	21.35	15.21	3.74		YDR040C	0	6.19	1.22	3.49	13.49	11.8	2.22	2.93	1.21	0	2.63	5.01	0	4.65	0	2.11	6.64	0.97	0	3.63	0.82	4.24	2.37
YDR041W	147.21	131.85	156.81	141.56	100.14	148.64	145.4	166.42	99.43	134.39	112.13	91.17	115.49	160.83	161.19	128.53	114.83	155.65	156.34	168.63	119.45	125.38	87.88	153.22		YDR041W	18.82	10.24	16.85	22.26	12.1	13.91	20	32.74	0	12.04	16.33	7.09	0	11.93	0	17.76	0	0	5.28	23.45	0	11.45	22.77
YDR042C	45.15	33.7	16.65	52.76	65.75	67.98	36.53	65.75	67.94	49.9	51.92	41.7	54.25	53.69	42.4	22.58	39.85	27.14	28.31	35.13	31.21	34.68	29.43	20.21		YDR042C	1.07	0.58	0	0.84	0	0	0	0	0	0	0.73	0.66	0	1.88	0	0.4	0	0	1.35	0.67	0	0.75	1.84
YDR043C	173.81	97.83	209.84	209.54	158.04	115.84	330.34	232.5	225.26	256.4	171.01	156.51	237.77	332.21	189.58	194.16	270.5	270.05	168.89	186.14	168.74	297.85	150.45	119.11		YDR043C	12.16	2.36	7.59	15.07	10.73	3.24	8.95	13.6	0	10	12.39	4.29	4.73	13.73	1.76	19.02	20.55	0	1.1	8.66	0	5.22	12.95
YDR044W	43.4	27.15	18.14	18.29	17.34	14.72	11.03	15.98	19.47	81.81	30.77	19.49	19.09	25.8	24.98	19.21	13.25	21.29	77.02	55.03	37.56	37.11	169.54	25.9		YDR044W	99.16	120.8	97.15	144.35	98.55	77.26	41.52	25.74	56.71	32.59	80.75	73.32	76.03	50.99	8.88	21.1	45.36	34.07	22.12	98.32	115.38	71.6	206.33
YDR045C	519.88	769.21	395.42	548.42	903.31	748.56	380.23	666.17	682.26	325.05	599.7	645.19	667.01	590.79	558.49	465.56	574.69	431.38	469.46	604.07	421.33	713.74	403.93	484.43		YDR045C	51.55	21.05	33.89	40.66	109.44	30.86	40.29	50.45	0	98.93	85.34	44.71	4.38	42.43	0	19.46	0	66.79	0	46.17	0	25.03	38.78
YDR046C	44.05	22.87	22.38	33.79	29.12	34.26	57.05	46.6	38.25	53.44	35.9	23.45	35.63	52.68	45.94	70.21	68.65	70.62	77.74	52.53	35.95	56.17	89.25	41.18		YDR046C	15.23	3.93	5.51	20.44	12.58	8.96	15.33	8.37	0	8.72	11.79	7.41	3.27	8.68	1.08	8.78	12.64	5.54	3.03	14.82	4.69	8.02	26.49
YDR047W	29.6	21.85	13.23	23.72	14.07	18.32	31.8	30.46	14.57	23.49	26.02	21.71	14.97	28.63	27.02	35.87	27.86	32.1	48.71	30.71	14.17	23.27	49.57	13.3		YDR047W	19.4	6.87	6.96	21.81	13.11	12.39	19.27	0	0	17.69	27.68	7.93	5.28	21.72	0.98	12.09	11.47	10.06	2.45	22.06	8.51	7.37	15.01
YDR048C	8.82	0	7.25	21	15.94	14.07	21.1	11.83	11.19	29.78	18.96	34.09	40.71	9.38	7.83	7.89	25.95	5.79	21.99	6.85	14.18	31.51	18.88	14.08		YDR048C	0	0	1.04	2.94	2.97	0	0	0	0	0	2.53	3.46	0	0	0	0	0	0	0	0	0	2.66	2.28
YDR049W	31.88	22.88	14.84	25.44	44.45	29.54	32.58	31.89	39.92	33.25	29.63	24.78	24.77	32.69	25.98	32.83	38.15	28.33	35.94	35.86	19.67	40.85	48.22	22.81		YDR049W	3.05	4.98	4.92	1.8	8.62	5.14	4.48	0	0	1.95	8.8	5.01	0.69	3.57	0	2.49	3	5.26	1.6	5.38	0	3.85	4.65
YDR050C	344.39	145.51	127.39	194.12	113.56	153.29	152.75	210.87	137.25	227.09	198.84	209.75	94.1	237.47	197.72	179.75	154.02	239.16	310.72	183.2	111.03	133.4	273.47	115.48		YDR050C	1050.15	541.72	407.56	1177.02	762.67	527.84	965.59	518.18	489.24	990.3	1117.26	936.5	469.45	908.9	90.94	602.39	670.84	1257.62	180.89	962.62	1161.38	349.21	973.17
YDR051C	289.78	345.05	295.31	311.31	370.5	331.99	320.84	338.71	310.52	310.34	238.95	236.35	260.7	283.9	262.52	221.11	288.79	232.26	234.38	271.61	235.31	277.38	219.32	216.29		YDR051C	10.18	9.33	10.32	6.76	19.02	8.84	8.67	8.39	0	3.08	10.91	9.75	4.37	10.82	0	9.91	0	22.21	2.03	8.68	9.4	8.7	10.44
YDR052C	28.29	12.18	22.83	34.96	45.75	29.28	47.77	41.31	47.24	44.18	44.64	36.79	28.81	44.85	32.86	34.59	34.29	27.91	43.73	38.64	25.33	40.06	62.7	29.19		YDR052C	3.77	0.74	1.29	5.15	5.46	2.63	3.97	7.06	0	2.16	9.29	4.7	0.75	4.95	0	2.7	2.66	0	0.28	5.34	0	1.52	3.19
YDR053W	0	0	0	0	0	0	1.35	9.66	1.33	3.64	5.6	1.81	7.69	4.18	8.45	1.53	6.63	4.3	4.54	5.77	4.08	0	0	0		YDR053W	4.95	2.39	8.12	1.74	6.08	2.39	0.05	0	0	0	9.33	11.07	1.63	0	0	6.01	0	0	0	0	0	4.57	2.92
YDR054C	66.18	33.87	50.05	45.37	68.84	46.04	62.51	60.01	58.66	50.93	58.91	49.62	35.55	50.76	47.98	36.8	37.26	38.33	58.1	44.25	26.25	34.48	78.56	30.22		YDR054C	23.18	36.5	29.79	24.71	57.08	33.68	25.35	29.44	0	22.85	42.92	24.93	4.26	30.26	3.81	23.42	14.82	0	10.28	21.47	11	26.78	30.53
YDR055W	23.19	6.85	8.88	12.33	10.02	6.46	32.21	35.43	20.36	33.52	21.34	14.17	17.78	26.01	21.96	29.87	29.87	31.88	52.29	20.82	19.78	33.25	64.72	20.13		YDR055W	72.97	6.41	14.64	51.56	13.2	5.06	55.08	11.9	0	26.26	33.56	20.98	25.85	33.03	0	54.39	22.47	39.39	4.79	54.23	6.67	8.86	71.89
YDR056C	713.42	417.74	714.6	446.23	539.74	517.35	296.77	339.83	548.84	433.63	349.77	364.2	185.63	278.88	211.96	195.47	265.82	259.27	290.59	251.52	222.4	219.54	297.93	315.7		YDR056C	17.52	47.68	57.85	37.39	78.75	42.77	30.32	16.14	0	7.91	57.39	39.08	14.02	50.66	2.09	27.23	0	0	10.4	24.4	54.25	39.67	34.26
YDR057W	69.62	42.16	40.58	49.83	46.97	52.79	62.64	53.23	48.97	69.79	40.19	32.57	42.07	50.81	41.09	47.2	51.11	49.37	59.47	50.72	31.81	58.36	52.95	34.83		YDR057W	1.21	2.96	3.05	3.81	5.13	2.09	3.55	0	7.81	4.64	5.13	3.44	0.82	3.45	0.61	4.22	0	0	1.14	2.82	0	3.2	4.15
YDR058C	96.86	62.17	81.74	95.53	77.64	77.94	118.93	108.55	59.15	102.8	75.24	52.9	62.64	85.29	82.63	59.48	60.64	62.66	91.06	73.94	56.78	71.67	55.61	66.3		YDR058C	1.1	4.81	4.37	3.92	2.13	0	2.84	0	0	1.06	1.5	4.09	0.75	5.33	0	2.7	0	0	0.7	3.44	0	2.14	4.11
YDR059C	54.14	7.84	13.57	30.29	19.89	46.19	21.2	34.23	16.56	18.06	19.77	17.98	8.66	20.77	30.9	13.98	8.77	22.1	33.47	14.84	8.84	12.28	12.62	9.88		YDR059C	22.63	34.12	29.49	37.08	51.07	33.35	20.49	54.52	0	16.7	62.67	40.8	7.11	35.15	0	27.61	41.18	36.09	4.39	29.29	30.55	31.36	16.96
YDR060W	98.55	110.11	107.81	78.13	145.11	103.76	42	90.55	135.05	49.36	81.75	66.77	58.81	65.54	48.86	60.57	64.83	54.35	52.67	64.08	56.17	83.37	72.38	51.9		YDR060W	10.05	25.64	17.8	10.41	51.05	26.97	15.22	18.79	15.52	8.35	31.27	25.02	1.63	16.59	1.21	4.08	15.96	0	7.38	15.04	5.26	22.77	16.42
YDR061W	49.74	13.69	21.9	20.43	19.23	27.7	29.45	25.05	24.49	28.02	17.83	10.63	19.66	27.28	30.25	32.99	29.7	37.29	37	27.37	19.67	27.44	38.53	22.98		YDR061W	4.86	4.8	4.11	5.51	5.16	3.72	7.82	0	0	5.25	5.37	3.28	2.07	6.14	0	3.1	3.59	6.3	0.77	7	0	2.9	8.88
YDR062W	51.45	31.39	18.1	44.51	39.3	32.39	35.9	40.51	34.01	32.14	54.96	43.81	26.59	50.14	34.46	31.89	26.63	35.86	53.47	39.59	22.12	31.95	37.45	17.57		YDR062W	25.84	7.59	9.72	28.63	32.28	15.76	26.91	36.37	0	20.62	53.05	26.5	9.08	36.45	2.35	23.13	24.04	6.02	5.49	32.56	20.38	14.97	32.62
YDR063W	255.34	108.47	194.35	422.19	149.66	172.61	510.71	249.82	214.41	449.2	283.26	263.52	320.14	344.56	284.39	324.13	393.47	350.74	285.17	325.63	321.02	317.94	358.99	432.66		YDR063W	37.84	2.81	5.4	37.99	5.31	1.83	31.63	0	0	13.2	43.22	8.49	2.34	33.22	0	39.62	122.05	35.66	2.17	37.51	0	6.68	36.48
YDR064W	1367.16	817.27	919.6	1317.57	689.5	1025.18	961.38	830	626.53	720.53	1021.79	933.06	660.45	1119.27	1013.92	829.73	743.18	1211.22	871.43	802.75	511.88	661.33	812	540.11		YDR064W	1112.05	492.04	348.81	1150.2	736.61	439.84	1186.42	552.45	217.33	1025.18	1465	974.36	363.38	1084.07	112.26	874.08	774.81	870.66	214.05	1170.22	589.62	341.75	1082.32
YDR065W	18.32	4.33	16.84	25.52	14.77	18.46	28.56	23.15	16.83	32.67	18.79	11.3	24.38	28.05	30.42	34.09	21.29	36.03	34.26	26.89	19.51	29.82	21.58	19.98		YDR065W	1.92	0.26	0.33	1.52	1.85	0.51	0.71	0	0	0	1.63	1.63	0	1.26	0	1.63	0	0	1.21	1.2	0	0.51	1.93
YDR066C	42.65	24.81	32.18	36.77	27.1	28.85	45.39	56.58	20.4	50.16	33.36	27.17	59.19	56.71	62.1	70.73	59.93	66.53	72.47	64.36	36.36	48.17	30.33	36.45		YDR066C	6.61	3	2.11	1.74	0.85	2.93	1.62	0	0	4.23	0.75	0.34	0	4.83	0	2.08	0	0	0	2.74	0	1.94	3.16
YDR067C	160.72	77.63	164.32	118.56	90.88	110.76	113.84	107.57	98.53	113.99	85.27	71.3	90.27	99.11	98.18	90.44	93.23	109.57	109.68	101.59	74.85	83.19	95.31	102.07		YDR067C	1.81	5.43	7.56	17.17	11.2	3.86	10.68	14.2	0	3.48	5.54	4.75	1.23	7.96	1.84	5.14	0	0	1.14	3.96	0	2.24	5.2
YDR068W	172.22	233.16	287.61	230.94	244	198.08	350.11	276.06	254.7	403.52	234.55	197.77	331.36	276.66	282.53	234.11	367.5	241	291.05	335.85	371.9	345.26	246.37	347.08		YDR068W	4.12	1.28	2.81	7.42	2.74	0.94	5.63	0	0	3.39	5.19	2.9	0	5.68	0	6.22	0	0	0	6.6	0	1.45	8.43
YDR069C	16.48	4.52	11.4	9.43	7.2	8.25	9.16	8.06	6.36	10.12	7.28	6.04	6.99	11.76	9.89	11.23	7.75	11.51	17.58	12.93	9.34	7.31	11.03	5.53		YDR069C	1.84	1	1.16	4.09	3.36	2.4	1.97	0	0	1.6	2.73	1.91	1.14	2.35	0	2.27	1.98	0	0.63	2.5	0	1.95	2.2
YDR070C	179.04	93.19	272.03	376.93	181.82	181.2	1407.19	774.12	525.57	936.19	300.21	335.33	303.7	708	772.26	205.4	265.8	202.96	391.15	292.78	223.25	255.41	412.27	298.33		YDR070C	124.12	76.02	62.17	199.9	59.89	35.78	57.07	0	0	119.1	158.07	95.68	197.01	304.23	0	509.68	183.49	0	26.1	77.34	181.52	32.88	74.11
YDR071C	203.6	196.03	234.25	292.39	228.47	297.23	279.95	345.73	245.94	275.3	320.09	272.04	253.04	357.41	288.59	239.99	256.2	252.02	326.39	291.39	219.55	265	253.12	253.4		YDR071C	36.64	46.14	58.51	72.27	69.84	54.85	63.19	53.8	0	21.98	82.45	53.32	17.14	63.34	6.96	50.59	0	0	8.67	62.08	0	48.54	76.14
YDR072C	61.64	26.68	23.68	31.66	42.19	32.34	36.64	44.88	41.35	36.12	33.04	29.87	33.2	32.89	32.55	31.21	27.64	35.26	54.61	33.78	20.18	25.07	59.41	20.34		YDR072C	12.78	16.46	18.05	12.29	22.14	18.58	11.01	29.29	0	4.19	12.07	7.4	2.97	12.86	0.63	10.24	3.69	12.92	3.15	15.73	0	15.96	12.51
YDR073W	108.33	137.57	132.51	105.09	113.47	76.97	87.12	97.73	114.67	106.44	113.87	101.96	116.06	95.02	85.04	140.77	216.84	138.87	114.48	102.25	116.33	154.74	150.9	127.34		YDR073W	9.72	11.34	7.02	12.05	6.43	2.22	9.19	0	0	2.66	7.54	5.99	1.89	4.88	0	5.24	0	0	0	10.38	0	3.43	6.37
YDR074W	69.13	17.95	23.96	67.04	37.61	23.34	84.22	62.96	30.36	63.92	55.75	46.62	18.8	68.21	44.26	45.31	44.35	37.73	80.17	38.39	22.22	26.4	66.67	18.84		YDR074W	23.21	9.71	12.52	54.39	28.09	18.62	22.69	5.43	22.41	23.94	59.54	41.83	17.21	92.79	2.11	106.83	34.83	14.37	11.15	27.31	15.2	19.64	34.46
YDR075W	101.96	56.1	72.78	53.54	57.33	83.72	39.16	59.05	55.81	39.32	32.55	18.38	48.99	30.91	43.14	31.07	38.25	46.09	42.07	44.76	24.85	33.47	42.12	37.57		YDR075W	2.37	5.49	10.94	1.87	18.31	6	4.8	9.29	0	1.14	8.06	6.77	0	2.6	0	2.24	7.01	0	2.99	5.17	0	7.75	3.74
YDR076W	18.59	9.51	7.41	9.93	7.8	12.5	15.63	18.49	10.57	25.33	12.53	8	18.5	16.18	19.85	23.2	20.86	19.18	29.96	21.86	18.24	23.25	22.04	16.38		YDR076W	2.96	2.3	1.9	2.67	0.65	1.12	3.73	0	0	0.81	2.01	1.82	0.57	0.37	0	1.28	0	0	0.53	1.05	0	1.19	2.18
YDR077W	1064.39	1160.22	799.93	1095.2	1442.18	595.71	1634.31	1281.09	1260.85	1413.33	1276.11	1696.52	913.52	873.34	939.49	742.36	1028.65	687.58	1428.02	948.75	710.3	1032.93	2430.66	1505.78		YDR077W	1043.93	736.45	557.23	1346.74	796.14	691.51	974.58	677.75	232.16	581.38	1312.72	784.6	410.71	1014.09	82.3	947.42	1011.18	809.69	298.3	1216.11	889.19	472.92	1180.17
YDR078C	84.62	78.12	71.13	98.28	104.29	120.47	66.68	98.41	94.13	70.51	87.54	70.18	51.78	91.71	67.04	72.89	55.19	60.75	83.46	67.79	46.35	48.94	44.32	55.24		YDR078C	0.91	2.48	2.12	0.72	3.52	0.49	1.34	0	0	0	3.72	1.13	0	1.6	0	1.72	0	0	0	1.14	0	2.26	0.52
YDR079C-A	852.68	1285.85	505.53	768.72	1003.53	926.88	717.02	1209.72	837.91	748	1023.34	1116.74	994.39	1181.45	1210.36	1063.52	862.98	803.72	1374.95	947.8	691.88	1171.71	620.58	760.72		YDR079C-A	12.97	21.19	37.22	133.05	70.12	96.67	28.64	0	0	0	79.31	8	17.65	34.18	0	29.4	153.43	0	0	56.59	0	18.33	37.19
YDR079W	390.15	440.06	484.99	508.26	454.19	363.4	578.52	475.7	466.97	483.25	383.29	325.48	357.57	385.89	334.55	371.48	390.47	297.05	311.06	320.36	252.06	484.67	276.33	429.12		YDR079W	22.06	49.75	41.76	27.34	34.06	16.77	25.5	0	0	18.14	23.54	17.49	4.29	35.97	0	32.13	0	0	7.95	15.71	0	21.15	28.9
YDR080W	30.62	7	22.39	28.63	24.98	25.04	30.72	32.8	26.35	30.65	25.58	17.3	25.35	36.57	30.22	29.53	37.72	33.02	40.94	35.08	24.82	26.95	28.39	17.85		YDR080W	1.24	1.27	1.26	2.7	2.21	0.74	2.28	0	0	0.89	1.58	1.93	0.63	1.91	1.26	2.11	0	0	0.2	2.71	0	1.54	3.29
YDR081C	25.54	11.31	10.11	14.09	17.5	15.19	14.97	14.55	18.6	15.05	13.84	11.53	12.33	14.51	12.35	18.6	18.39	16.36	21.46	18.44	14.24	20.31	22.93	13.3		YDR081C	3.01	3.46	3.59	4.09	8.01	4.1	3.69	2.62	0	3.53	6.8	4.75	0.46	3.53	0.34	1.96	0	6.94	0.84	4.8	2.94	3.55	5.85
YDR082W	40.58	9.07	14.39	24.78	20.06	27.64	28.77	23.21	19.66	32.13	17.16	10.59	22.05	16.87	26.99	23.26	22.67	25.45	30.7	23.91	15.77	19.9	19.22	12.06		YDR082W	0.34	0.18	0.18	0.26	0.78	0.71	0.49	0	0	0.64	0.46	0.1	0	0.88	0	0.25	3.97	0	0	0.63	0	0.24	0.77
YDR083W	168.28	142.88	148.47	179.6	245.48	185.83	81.49	161.22	228.92	93.46	158.16	134.73	100.85	122.56	76.67	89.35	115.87	73.39	68.9	120.68	68.23	112.51	131.85	81.65		YDR083W	6.61	44.13	35.02	7.3	58.5	21.1	9.72	41.39	11.4	5.07	24.24	23.67	3.6	21.27	3.57	3.66	5.21	0	5	10.16	0	22.56	10.35
YDR084C	72.02	14.55	35.66	51.13	27.44	35.89	66.05	49.17	33.96	58.96	50.27	33.36	41.79	53.41	50.97	49.58	44.48	51.78	70.84	53.09	28.71	36.46	55.4	24.43		YDR084C	33.37	5.28	9.56	41.61	20.78	14.32	38.02	16.86	0	12.4	36.56	14.61	7.32	29.3	0	24.39	38.2	0	4.07	28.85	18.89	7.61	28.39
YDR085C	14.92	4.67	8.09	9.39	7.98	5.21	21.75	16.29	9.48	12.86	8.19	4.17	8.26	12.06	12.1	14.14	12.03	16.47	19.18	10.27	4.94	9.88	15.79	3.93		YDR085C	0.26	0.14	0.21	1.02	0.4	0.97	0.57	0	0	0	0.53	0.4	0	0.46	0	2.06	0	0	0	0.65	0	0.55	0.89
YDR086C	1044.25	1984.75	1531.55	1373.06	1753.99	1848.52	1464.62	1747.94	1409.93	1055.87	1826.09	1898.58	1264.02	2180.93	1972.66	1314.08	1157.91	1861.39	1517.23	1682.89	1436.89	1523.76	1327.27	1699.28		YDR086C	207.34	192.84	155.78	238.52	413.5	151.72	184.31	0	0	116.06	381.4	197.13	47.01	242.72	0	215.3	204.34	0	32.7	306.83	0	109.85	297.12
YDR087C	387.93	347.5	378.35	342.06	459.14	409.28	136.59	278.12	450.89	141.22	195.98	193.75	208.12	166.58	178.3	155.82	177.98	166.11	115.66	205.55	114.27	190.01	173.6	212.45		YDR087C	12.18	44.95	38.92	9.07	70	35.65	19.91	10.6	0	6.49	40.9	34.43	4.6	21.98	4.11	6.13	8	28.06	10.24	21.08	0	33.46	14.35
YDR088C	164.26	141.25	151.39	123.73	133.41	122.75	158.56	98	136.96	109.25	90.9	68.84	96.35	95.03	84.79	83.14	94.8	91.1	82.92	89.91	62.89	123.12	84.64	83.8		YDR088C	0.91	1.73	4.16	2.15	5.96	3.14	1.67	0	0	0	2.16	2.38	0	3.59	0.92	3.09	0	0	0	1.7	0	1.77	2.34
YDR089W	8.51	4.03	4.88	3.54	3.62	3.65	5.79	5	7.62	9.5	6.1	4.52	6.42	5.62	6.48	10.89	7.22	10.33	28.46	8.94	7.73	7.33	16.74	3.39		YDR089W	4.48	1.17	0.81	12.85	5.11	0.75	2.77	0	0	1.37	1.7	2.15	0.24	2.2	0.36	2.7	0	11.14	0.68	8.26	6.29	1.64	9.14
YDR090C	42.45	10.6	11.46	16.04	31.02	18.79	21.21	14.18	20.02	23.4	24.87	15.52	16.39	17.36	12.9	21.37	11.26	14.03	31.92	16.47	15.68	20.75	23.02	11.12		YDR090C	6.47	7.37	8.12	4.18	12.26	5.01	5.63	0	0	5.64	9.19	7.62	1.6	11.36	0	5.33	6.96	0	1.48	9.9	10.32	8.73	7.75
YDR091C	76.87	21.5	12.92	24.44	19.35	25.89	14.78	23.38	19.52	13.45	20.25	14.61	12.67	19.48	14.68	19.83	14.97	21.32	28.1	16.47	8.42	11.97	24.21	7.77		YDR091C	35.8	59.05	43.62	38.64	82.5	54.05	43.51	20.76	6.86	31.55	75.47	62.47	10.46	50.76	3.76	22.23	21.95	21.99	16.73	48.91	32.58	43.37	53.96
YDR092W	116.55	73.95	28.78	91.85	88.01	63.1	90.72	86.42	72.32	90.85	92.18	81	52.28	89.68	71.42	48.55	57.9	59.37	102.41	80.94	33.35	62.54	141.56	26.39		YDR092W	57.45	54.52	43.28	62.15	57.03	29.7	61.59	0	0	22.05	89.19	45.56	4.47	73.51	0	43.39	19.41	34.03	10.35	72.62	0	35.37	57.4
YDR093W	8.92	3.05	2.37	8.35	10.57	4.78	9.77	8.41	9.8	11.73	13.31	10.25	5.57	10.58	7.76	10.05	7.18	5.78	19.77	9.84	6.62	7.05	16.64	4.28		YDR093W	4.03	1.74	1.19	4.6	4.77	3.11	3.6	1.46	0	2.71	8.38	4.57	1.39	5.29	0	3.42	5.5	0	0.82	4.33	1.63	2.07	5.92
YDR094W	36.1	24.54	5.6	62.34	57.41	23.41	74.82	84.95	45.17	62.51	60.36	56.03	59.03	61.15	31.23	47.22	61.63	45.53	77.88	48.45	7.77	45.82	66.84	21.92		YDR094W	11.45	7.95	1.57	8.13	13.61	13.77	12.52	0	0	4.87	19.98	7.35	0	17.33	0	2	0	0	0	8.62	0	1.04	7.11
YDR095C	4.78	0	0	1.92	0	1.39	2.86	2.58	4.08	4.7	6.42	2.34	4.05	3.84	2.84	4.3	2.05	2.35	6.96	6.2	2.59	2.87	4.43	5.78		YDR095C	0	0	0	0	0	0	0	0	0	0	0	0	0	0	0	0	0	0	0	0	0	0	0
YDR096W	18.95	11.73	9.13	17.8	18.62	11.76	19.93	15.2	15.04	18.22	13.59	13.35	7.61	18.21	13	14.57	16.1	14.23	25.3	13.95	11.91	15.44	25.42	9.53		YDR096W	3.13	2.65	1.71	3.97	5.09	4.34	2.94	0	0	1.33	3.89	3.48	1.42	3.81	0	6.82	0	0	0.44	4.87	0	2.64	4.08
YDR097C	15.36	4.41	2.62	18.75	11.18	8.82	24.11	24.98	11.27	26.72	33.26	26.32	13.51	39.78	27.03	19.27	14.91	13.03	24.25	22.56	9.01	21.4	16.93	10.29		YDR097C	4.04	1.33	1.45	2.03	1.61	1.43	3.96	0	0	4.22	10.47	5.85	0.67	8.59	0	2.68	0	2.54	0.62	5.33	0	1.3	3.86
YDR098C	128.03	87.76	97.16	129.35	94.52	96.76	93.07	88.97	84.66	88.06	114.08	90.33	71.36	108.15	80.29	78.69	72.25	71.36	90.91	79.22	49.47	68.18	81.32	72.96		YDR098C	22.6	36.49	24.06	28.89	39.71	21.57	28.09	36.61	0	35.89	57.16	25.71	5.3	42.42	0	23.25	9.22	0	5.9	35.45	0	19.54	37.11
YDR099W	183.54	74.92	144.45	163.25	148.61	133.66	209	160.43	114.91	163.9	152.16	164.41	120.31	194.53	149.15	134.98	145.96	152.45	180.04	140.05	95.9	173.07	182.26	134.59		YDR099W	141.52	46.46	53.05	162.03	103.56	55.1	147.44	65.11	0	89.17	186.06	122.56	44.42	161.24	10.56	156.87	106.54	74.17	20.98	158.46	133.78	51.03	174.2
YDR100W	86.98	25.04	28.88	67.09	24.43	30.89	89.38	77.56	25.05	73.71	47.93	22.33	47.95	87.27	81.26	65.76	63.49	69.15	110.85	58.65	39.99	49.68	44.31	47.31		YDR100W	24.09	9.08	12.66	45.31	7.15	12.82	47.71	0	0	39.11	39.01	13.71	17.65	42.3	0	77.66	0	0	0	68.12	0	8.51	59.48
YDR101C	70.25	49.14	46.22	46.04	71.91	56.59	20.69	50.86	59.24	21.85	39.06	34.27	31.49	25.35	21.93	32.5	20.34	25.81	29.95	34.37	18.01	38.48	37.16	21.66		YDR101C	14.73	73.5	54.06	15.27	87.8	50.07	24.48	8.54	0	8.9	55.02	40.45	2.97	32.57	4.42	6.18	12.9	11.31	11.35	25.83	4.79	42.48	21.26
YDR102C	15.12	0	12.55	13.63	11.33	10.96	12.07	20.43	8.06	5.57	14.23	12.94	28.86	28.33	22.43	24.5	19.48	21.07	30.29	33.34	16.36	13.64	7	3.05		YDR102C	0	1.75	0.44	2.54	2.49	0	0	0	0	0	0	0	0	0	0	0	0	0	0	2.01	0	0	0
YDR103W	13.09	3.81	6.25	5.64	5.94	6.09	6.65	5.47	6.85	6.82	6.18	3.68	5.05	4.99	3.65	8.21	5.62	4.88	12.06	7.1	6.44	6.91	7.1	3.2		YDR103W	0	0.18	0.25	0.13	0	0.18	0.25	0	0	0	0	0.05	0	0	0	0	0	0	0	0.11	0	0.06	0.1
YDR104C	19.11	4.4	7.37	11.42	11.9	9.96	11.25	10.99	11.05	11.25	9.01	6.16	8.01	10.65	8.2	13.61	9.22	11.03	18.14	11.29	7.12	10.67	12.02	6.34		YDR104C	0.85	1.13	1.43	1.25	1.6	0.71	0.9	0	0	0.47	1.91	0.9	0	0.43	0.25	0.64	0	0	0.31	0.99	2.14	0.65	1.33
YDR105C	19.06	4.77	4.13	14.61	9.62	10.09	14.38	14.78	10.25	14.25	18.26	10.33	5.62	14.85	14.99	15.36	11.03	13.99	31.68	16.12	11.2	7.97	17.65	6.68		YDR105C	7.77	1.92	2.94	11.97	12.26	3.38	10.91	0	9.13	7.45	12.23	6.97	5.28	9.61	0	8.66	0	0	0.89	8.8	0	4.49	13.56
YDR106W	11.2	0	15.39	5.57	6.94	5.37	4.31	5.43	10.21	7.59	9.55	5.29	5.9	9.92	6.41	11.4	7.96	4.05	16.59	8.41	7.52	9.29	4.77	6.22		YDR106W	0.66	1.07	0.81	0.52	0.51	0	1.45	0	0	0	0.45	0.81	0	0	0	0.25	0	0	0	0.41	0	0	1.51
YDR107C	10.72	7.48	6.01	7.36	7.92	8.96	12.22	11.43	6.53	16	13.61	10.48	11.33	12.07	14.12	13.43	11.95	8.85	26.76	14.87	12.05	10.71	11.52	6.51		YDR107C	5.46	1.94	1.26	6.74	1.83	1.14	6.46	0	0	3.19	4.51	2.93	0.65	2.5	0	4.12	5.61	0	0.3	7.24	0	1.84	5.57
YDR108W	36.7	15.37	12.85	17.22	17.19	17.49	15.66	15.29	19.47	23.08	11.91	10.31	11.77	13	13.78	14.51	13.98	14.53	21.48	17.45	11.26	16.05	22.25	13.12		YDR108W	3.18	1.61	2.08	3.41	3.69	2.06	2.18	0	0	1.75	3.55	2.1	0	1.8	0	1.8	2.69	9.43	0.29	2.55	0	1.53	3.39
YDR109C	20.02	3.99	3.45	10	10.12	5.8	17.74	9.97	12.97	16.47	10.9	7.12	14.55	11.55	10.25	14.6	20.09	10.65	20.16	16.32	10.69	19.69	20.87	8.8		YDR109C	1.99	1.09	0.48	2.8	1.54	0.47	2.61	0	0	1.28	2.56	1.23	1.21	1.56	0	1.67	5.24	4.59	0.56	3.17	3.89	0.63	2.29
YDR110W	62.91	68.62	37.52	52.44	70.23	58.76	54.25	70.19	60.44	57.67	56.95	43.54	60.08	56.68	62.93	53.68	59.67	48.44	50.85	75.76	47.44	65.7	50.41	52.19		YDR110W	2.3	2.03	1.77	1.81	4.66	2.29	1.27	0	0	0.55	4.29	2.04	1.56	1.51	0	0.98	0	0	0	3.58	0	2.33	1.98
YDR111C	16.27	9.11	1.9	17.25	9.43	9.75	17.75	14.98	10.13	13.23	20.09	14.27	5.81	24.18	13.18	13.67	11.27	11.53	20.09	15.27	6.21	10.91	13.59	2.25		YDR111C	5.86	3.68	1.92	7.45	13.33	6.59	8.15	10.21	0	3.91	25.01	10.09	2.66	16.88	1.62	8.1	11.56	6.75	3.29	10.15	5.72	4.36	9.45
YDR112W	29.74	84.73	30.58	34.01	45.06	20.08	54.52	33.59	41.05	37.5	47.78	51.08	27.71	31.61	17.53	21.09	26.43	15.18	38.08	43.07	4.98	29.2	32.57	28.63		YDR112W	0	2.65	4.81	0	0	0	0	0	0	5.61	0	3.17	0	0	4.3	1.75	0	0	0	0	0	1.6	5.4
YDR113C	19.21	8.43	7.29	16.5	15.21	8.27	35.05	28.48	21.31	57.98	46.34	33.55	27	44.94	43.31	37.35	32.52	27.89	50.97	47.55	17.82	29.04	59.32	17.69		YDR113C	3.74	0.76	1.34	4.8	3.61	0.5	9.98	7.32	0	5.39	6.35	4.33	1.91	9.03	0	3.36	0	0	0	7.87	0	0.5	5.9
YDR114C	14.61	56.1	16.17	50.75	72.97	49.42	71.93	86.89	64.42	78.98	78.58	54.79	53.71	86.03	69.36	68.4	71.12	46.32	67.41	93.5	47.44	82.01	36.1	70.66		YDR114C	4.15	2.26	0.57	0	3.2	0	0	0	0	0	2.82	0	0	3.64	0	0	0	0	0	0	0	0	0
YDR115W	361.89	555.66	360.45	390.66	302.92	468.97	378.89	453.31	435.89	370.2	402.89	341.4	292.49	448.82	531.65	288.18	310.77	406.19	429.42	353.36	350.07	327.63	239.25	452.86		YDR115W	39.91	63.21	31.72	80.13	56.01	34.75	61.39	0	0	55.7	98.56	49.22	19.74	47.78	0	39.73	85.81	75.21	9.15	85.9	63.67	32.03	54.07
YDR116C	56.89	29.51	34.46	39.43	41.46	36.99	41.73	42.38	41.65	35.12	42.16	31.95	22.82	36.61	32.15	34.32	29.05	37.05	59.07	41.87	19.96	38.82	64.57	30.36		YDR116C	7.21	19.97	16.56	15.5	14.16	11.16	9.16	0	0	12.57	12.46	7.07	0	6.9	0	8.41	0	0	4.13	10.21	11.5	9.95	11.64
YDR117C	41.07	18.16	17.95	25.6	29.36	27.04	29.67	27.22	24.37	28.89	28.71	20.82	22.93	29.66	24.52	28.72	25.54	30.25	39.01	33.14	14.99	27.63	35.9	17.43		YDR117C	6.62	4.7	4.17	7.27	9.12	7.66	6.78	9.02	0	1.66	9.78	5.77	1.18	7.84	0.58	5.22	3.41	0	2.18	8.61	0	4.17	8.75
YDR118W-A	0	0	0	0	0	0	0	0	0	0	0	0	0	0	0	0	0	0	0	0	0	0	0	0		YDR118W-A	0	0	0	0	0	0	0	0	0	0	0	0	0	0	0	0	0	0	0	0	0	0	0
YDR118W	22.74	7.73	13.38	15.46	13.8	14.94	24.24	19.76	16.7	27.01	16.72	10.13	30.03	24.34	26.13	29.43	26.94	28.69	35.11	27.03	15.57	25.27	18.13	16.24		YDR118W	1.72	0.4	0.8	3.1	1.51	0.78	2.71	3.84	19.04	0.94	2.17	1.06	0.67	1.29	0	1.39	0	5.09	0	3.36	0	0.95	1.83
YDR119W-A	7545.02	3968.57	4637.6	4768.37	2685.36	1574.96	8690.67	4279.93	2777.6	6418.9	2258.97	1656.34	4365.67	3860.9	3621.11	2922.43	4306.84	2495.32	2843.4	2361.97	2403.66	3623.5	2988.46	3385.59		YDR119W-A	299.9	367.38	248.38	266.15	246	69.83	124.11	0	0	251.8	203.7	69.36	76.5	477.27	0	594.53	0	0	47.3	280.31	0	139.03	257.87
YDR119W	59.49	15.68	25.14	43.24	31.68	36.3	40.09	40.79	26.25	25.62	37.35	36.31	30.58	42.7	34.22	42.75	38.8	42.39	45.77	40.77	19.76	31.79	42	25.37		YDR119W	12.08	8.14	5.48	16.96	16.92	5.56	17.03	9.62	0	9.04	28.1	15.6	2.79	18.34	0	13.07	4.84	12.74	3.1	17.36	0	9.04	19.14
YDR120C	59.23	29.54	28.33	25.48	47.37	26.19	24.57	32.37	40.69	22.36	27.35	20.45	28.67	16.47	18.56	22.29	27.01	17.99	22.18	28.12	26.79	25.75	37.61	18.07		YDR120C	7.98	26.86	17.57	10.79	34.12	15.93	19.09	13.4	0	6.57	22.47	18.55	1.94	11.77	1.15	3.66	3.37	0	3.24	18.66	0	17.32	13.57
YDR121W	149.28	34.73	85.82	92.18	146.16	80.55	85.1	75.44	139.49	84.45	82.69	72.04	58.1	54.64	57.89	70.73	83.24	67.8	71.53	67.04	67.12	80.81	138.88	54.16		YDR121W	4.41	17.39	16.7	10.43	22.96	14.06	11.34	0	0	2.11	23.19	15.96	0	9.67	0	6.24	26.05	22.83	2.78	11.67	0	10.5	13.89
YDR122W	19.28	6.49	8.42	15.04	16.34	11.57	21.06	17.18	13.63	12.05	15.18	10.34	6.45	13.75	9.63	12.97	10.17	8.21	22.91	10.88	7.87	8.13	22.77	6.4		YDR122W	5.19	1.73	1.77	6.48	6.23	6.75	4.98	2.26	0	0.28	7.63	7.11	0.78	8.98	0.29	8.43	0	0	2.73	6.29	5.06	4.17	6.86
YDR123C	43.16	5.43	15.27	11.34	36.04	17.02	13.84	17.97	38.94	19.12	13.32	12.11	10.2	6.82	11.75	12.99	6.68	8.58	20.87	15.78	9.95	12.76	27.53	8.55		YDR123C	1.21	9.85	6.84	0.48	11.64	7.38	1.33	0	0	2.31	4.1	1.3	0.82	4.24	0	2.05	0	0	0.76	5.26	0	7.45	2.42
YDR124W	20.89	7.52	5.42	7.85	9.29	10.41	6.77	5.29	11.7	7.38	5.62	4.47	2.77	4.89	5.03	7.29	2.8	4.92	11.65	6.77	7.06	6.28	9.27	2.63		YDR124W	0.56	1.51	1.14	0	1.72	2.07	0	17.43	0	0	0	0.17	0.76	0	1.13	0	0	0	1.4	0.35	0	1.38	0
YDR125C	22	11.71	13.02	16.58	10.77	16.16	21.38	20.25	12.27	18.62	12.18	7.88	11.45	19.58	20.54	21.49	15.34	20.42	24.11	21.02	11.78	11	11.84	14.04		YDR125C	0.37	0.81	1.06	1.46	2.58	0.2	1.09	0	0	0.71	1.26	1.14	0.51	0.65	0	1.12	0	0	0.47	0.93	0	0.79	0.43
YDR126W	36.5	14.37	10.36	26.25	27.57	23.51	16.43	25.63	32.74	20.84	21.47	14.95	21.17	15.36	17.77	22.69	25.72	17.18	23.4	22.33	18.9	26.26	33.91	12.57		YDR126W	3.19	6.95	2.91	2.94	9.03	2.83	2.74	0	0	1.02	5.42	2.79	0.72	4.67	0	2.61	0	0	0.67	2.32	0	2.82	2.44
YDR127W	15.53	3.41	3.68	9.42	7.89	6.56	10.09	8.81	8.09	9.75	9.6	6.34	5.83	10.56	6.84	14.14	10	10.44	18.5	10.47	8.52	12.27	18.63	6.26		YDR127W	19.28	5.35	4.52	24.3	13.5	7.54	25.03	2.96	0	13.06	24.33	16.32	4.11	28.05	1.72	13.03	12.3	15.67	1.91	26.97	18.24	7.14	32.99
YDR128W	20.82	10.18	8.8	14.94	14.02	12.39	13.7	15.51	13.44	13.26	11.83	10.14	10.32	13.19	11.61	15.33	10.58	14.12	18.35	12.95	11.98	15	18.4	7.67		YDR128W	1.2	1.23	1	2.83	3.59	0.92	1.66	2.08	0	0.77	3.88	2.21	0.18	3.15	0.27	0.75	4.72	2.76	0.67	2.32	0	1.92	2.44
YDR129C	87.71	46.09	48.62	69.94	49.57	58.15	60.66	60.62	45.85	49.63	51.96	38.81	24.34	64.88	47.95	50.19	46.27	63.47	67.07	46.03	29.15	41.9	75.41	34.93		YDR129C	31.69	23.23	24.61	47.44	34.68	28.82	42.78	11.72	12.91	29.69	52.54	39.17	10.86	52.15	5.05	44.01	26.56	10.35	6.61	39.03	30.66	18.24	41.05
YDR130C	34.42	8.62	22.36	24.89	25.22	21.04	43.6	25.08	27.14	55.15	29.37	20.49	45.07	48.46	50.17	49.58	53.34	65.51	59.4	46.97	30.77	41.39	37.43	25.33		YDR130C	5.74	1.39	2.26	5.03	3.45	2.04	4.22	0	0	6.12	3.47	3.93	2.6	2.24	0	2.89	0	0	0	7.55	0	2.03	5.12
YDR131C	22.54	7.93	8	10.9	4.38	10.48	17.03	12.84	9.1	16.4	9.44	8.92	19.85	13.26	13.78	16.23	17.44	21.44	21.05	14.46	8.19	16.97	14.45	8.04		YDR131C	0.59	0.48	0.56	2.78	1.36	0.94	1.73	0	0	2.25	1.39	0.54	0	1.55	0	1.77	3.47	0	0.74	1.83	0	0.73	2.02
YDR132C	33.41	3.02	18.92	10.71	9.71	13.67	12.23	12.32	13.75	12.74	10.99	8.46	9.33	11.57	11.19	15	12.49	16.49	19.03	12.03	13.61	11.34	16.02	4.12		YDR132C	1	2.01	1.92	0.53	3.36	1.78	1.23	0	0	1.93	2.5	1.45	0	1.76	0	0.76	0	6.94	0.42	1.67	0	1.18	2.5
YDR133C	436.38	269.69	669.17	342.3	252.04	324.81	327.63	345.78	249.26	466.9	304.22	296.55	410.89	429.43	438.76	485.99	431.9	551.67	557.48	439.3	252.06	480.23	662.28	461.9		YDR133C	37.82	25.73	10.76	44.76	7.3	10.11	37.09	49.35	0	36.29	38.56	18.47	8.57	19.38	0	8.33	0	0	0	13.74	0	11.13	27.11
YDR135C	25.05	8.05	9.09	16.52	13.96	11.01	15.81	16.62	11.13	14.94	17.04	11.51	10.57	16.27	11.92	16.69	12.2	16.04	27.49	13.96	8.44	13.31	18.2	7.23		YDR135C	7.45	4.43	3.2	9.01	11.11	5.28	13.07	7.77	0	5.91	16.38	8.54	2.16	10.55	1.01	8.13	5.87	2.06	1.25	9.96	3.48	5.82	10.19
YDR136C	15.58	0	2.25	10.31	3.04	6.28	8.65	6.59	9.25	9.98	13.84	3.97	6.89	8.7	7.23	9.27	16.29	7.11	17.76	14.05	11.72	13.03	3.35	13.1		YDR136C	0	1.26	0.47	0	0	0	0	0	0	0	0	0.36	0	0	0	0	0	0	0	0	0	0.41	0
YDR137W	50.44	14.1	21.11	48.69	22.22	32.6	52.44	36.81	23.75	46.36	29.63	23.63	39.3	47.93	48.28	45.68	43.92	50.12	49.8	45.14	27.21	34.99	31.76	26.64		YDR137W	2.65	0.39	1.09	3.42	1.49	0.9	2.13	0	6.23	0.46	4.91	2.75	0.66	5.71	0	2.55	0	0	0.3	3.15	4.23	0.68	2.9
YDR138W	23.36	7.55	13.06	19.32	17.5	14.76	21.99	19.67	19.51	20.9	17.85	12.39	15.44	15.4	15.61	21.43	18.16	17.18	24.36	18.88	15.43	19.81	27.34	14.07		YDR138W	2.72	4.11	3.03	3.97	4.85	3.12	2.93	6.56	0	5.23	4.98	3.04	0.86	4.05	0	3.48	2.48	0	0.53	5.09	3.68	1.78	4.08
YDR139C	1526.21	3366.96	3281.08	2254.02	3118.17	2295.11	2333.61	2073.24	2534.44	2223.43	2351.74	2441.74	2281.42	1965.1	1502.03	1726.4	2229.55	1464.72	1435.09	1850.31	2037.13	2390.43	1610.53	1818.86		YDR139C	109.62	179.05	125.25	157.22	246.19	143.19	65.98	0	1031.46	133.88	189.52	76.83	0	87.5	20.18	101.6	117.86	0	12.57	149.03	0	63.36	108.54
YDR140W	50.99	16.66	18.01	36.08	32.5	29.88	40.26	41.04	42.58	46.9	47.25	33.42	40.49	45.86	42.48	51.95	40.99	57.62	64.79	46.71	30.52	57.4	69.68	33.22		YDR140W	5.55	5.03	3.79	5.83	10.71	3.44	6.12	0	0	7.1	6.28	6.56	2.52	4.87	0	4.89	0	0	0	6.91	0	4.24	4.77
YDR141C	11.84	5.96	4.29	7	7.2	5.64	11.39	9.95	7.37	11.99	8.45	6.17	7.54	11.24	11.14	16.53	12.44	13.29	22.3	13.09	10.18	12.81	15.07	8.42		YDR141C	3.88	1.3	1.01	5.21	2.79	1.55	3.96	5.52	0	3.38	5.09	2.23	0.72	4.18	0	3.06	0	1.83	0.56	5.44	1.55	1.31	6.21
YDR142C	26.18	6.28	10.86	14.42	21.24	17.71	20.68	19.45	14.66	21.97	16.42	10.93	18.96	18.39	18.44	20.22	18.73	18.06	28.2	18.67	9.44	22.95	26.61	6.59		YDR142C	1.86	3.29	4.57	6.23	9.69	3.96	3.42	0	0	3.57	5.05	2.58	2.53	2.04	1.88	4.04	0	0	1.17	2.61	0	1.64	5.86
YDR143C	14.57	4.76	4.63	11.8	23.22	11.95	14.23	16.76	19.58	13.86	14.84	13.19	9.47	12.61	11.04	11.95	10.65	6.51	24.39	10.13	10.06	11.56	32.74	11.74		YDR143C	5.28	4.03	2.56	9.59	11.83	4.5	6.41	4.14	0	4.06	11.66	5.13	1.44	12.06	1.07	6.29	6.25	5.48	1.33	6.09	0	5.04	10.9
YDR144C	11.93	2.44	2.11	7.27	7.63	4.8	6.99	9.12	6.92	9.07	11.29	8.87	7.02	8.17	7.27	9.97	6.56	7.93	16.92	8.91	5.51	6.12	8.65	2.82		YDR144C	9.22	1.48	1	5.99	7.54	4.19	11.17	0	0	6.25	17.13	6.69	1.48	15	1.65	6.25	3.21	16.87	0.68	12.84	4.76	3.35	13.06
YDR145W	65.43	27.37	33.23	57.19	56.71	39.8	65.66	56.29	60.86	57.49	52.28	42.58	38.17	55.32	39.06	46.04	47.05	39.08	65.3	49.2	33.17	46.86	71.75	33.5		YDR145W	7.84	5.63	4.49	7.54	16.91	5.11	9.75	4.76	0	4.21	13.94	10.88	2.48	9.19	0.62	9.45	7.19	12.6	0.57	11.72	5.33	6.99	9.62
YDR146C	4.2	0	2.61	1.58	3.73	1.75	1.78	4.11	5.82	22.56	10.72	7.7	17.58	13.76	14.16	21.82	32.9	23.05	39.93	18.92	21.01	18.3	40.34	12.68		YDR146C	6.04	0	0	9.7	0.17	0.24	8.22	0	0	6.44	2.43	2.76	1.22	3.53	0	0	0	0	0	10.17	3.92	0	13.84
YDR147W	23.6	9.68	11.37	15.16	27.53	25.17	18.98	27.07	27.36	40.01	23.44	18.85	39.43	24.49	31.53	32.95	33.42	36.39	40.54	33.08	23.78	38.56	40.94	20.62		YDR147W	3.99	2.67	2.43	3.39	7.35	6.05	3.84	0	0	1.77	3.96	3.12	1.25	2.43	2.49	2.2	0	6.37	0.39	3.83	5.39	3.15	2.46
YDR148C	32.7	8.15	14.8	24.16	16.86	16.37	38.81	31.22	15.04	23.37	20.78	14.95	15.85	31.59	23.18	35.01	20.79	30.63	48.56	24.01	15.16	20.94	33.57	19.16		YDR148C	35.83	15.17	16.36	47.1	17.88	16.18	50.32	11.33	28.09	28.47	36.87	28.34	14.77	39.4	3.66	55.89	17.12	30.01	5.48	48.03	31.75	13.8	45.43
YDR149C	9.21	6.62	14.15	4.22	0	1.36	4.76	2.63	4.86	12.58	4.61	0.78	6.35	4.51	4.06	7.24	5.2	5.47	14.77	7.72	5.94	7.14	5.69	3.67		YDR149C	0	1.26	1.14	0	1.99	0	0	0	0	1.44	2.26	0	0	0.84	0	0	0	0	0.62	1.07	0	0	0
YDR150W	11.54	4.9	4.85	6.95	8.72	6.3	10.68	7.76	7.67	11.82	7.66	6.29	9.16	9.18	8.33	16.11	13.67	11.54	20.06	13.06	11.41	14.91	16.01	7.43		YDR150W	3.81	2.58	1.78	5.67	3.81	2.6	5.53	0.84	0	2.59	6.56	3.56	1.09	5.69	0.11	3.08	2.54	0	0.64	7.09	0	2.07	6.67
YDR151C	46.83	7.49	18.35	29.97	33.61	28.47	32.44	33.04	32.18	29.39	27.63	25.12	13.24	30.28	26.81	21.07	22.9	23.46	39.31	18.56	10.55	24.24	49.8	18.34		YDR151C	5.54	6.94	10.14	8.31	15.83	12.39	7.75	8.68	14.34	6.38	13.17	7.52	0.75	6.81	2.24	8.58	0	0	0.7	8.29	0	8.61	7.94
YDR152W	438.56	314.93	445.1	386.36	378.18	410.43	219.74	290.28	392.57	207.34	233.3	215.88	186.52	248.03	180.62	179.98	217.9	225.73	182.32	204.9	145.5	200.35	259.59	235.14		YDR152W	11.53	32.96	22.15	18.19	45.07	16.11	12.2	0	0	9.68	25.95	16.67	3.92	10.13	0	8.71	17.05	0	8.18	18.86	0	17.82	19.83
YDR153C	72.31	39.38	38.12	53.64	58.18	42.91	61.42	48.06	63.98	64.32	47.02	40.61	26.93	37.39	35.36	34.65	33.14	33.48	57.82	37.76	29.6	33.48	86.89	29.13		YDR153C	8.33	25.84	21.38	13.14	34.39	16.39	14.4	13.04	0	7.99	19.23	12.45	3.4	20.1	2.53	13.99	9.85	25.89	2.1	11.41	14.61	16.17	16.23
YDR154C	134.46	84.19	35.33	85.59	47.42	60.52	91.9	81.72	38.61	93.58	47.6	76.74	59.61	104.96	94.55	107.59	40.36	52.32	164.8	53.68	37.4	47.75	61.67	29.12		YDR154C	922	359.64	272.14	946.17	602.22	558.13	909.18	227.29	138.7	996.91	1085.36	564.49	500.11	870.12	26.15	782.14	495.43	716.21	160.58	783.97	892.99	250.97	677.32
YDR155C	283.3	110.11	80.09	228.11	83.75	108.05	227.92	191.34	70.69	216.15	194.86	159.67	66.55	160.94	171.71	111.56	64.36	77.97	187.79	115.05	44.66	88.41	196.4	66.39		YDR155C	683.85	282.36	236.69	681.91	418.62	304	677.74	323.83	81.38	507.94	686.93	520.02	347.4	700.7	58.65	657.21	391.76	396.19	171.27	631.69	420.25	212.23	450.5
YDR156W	36.53	9.05	31.3	37.77	45.89	53.96	26.33	56.04	46.24	17.36	54.48	49.54	19.99	31.53	25.86	27.15	12.14	15.45	39.47	23.23	12.75	5.67	62.57	17.09		YDR156W	48.19	129	86.41	39.6	151.92	110.07	62.05	31.45	0	38.54	130.93	73.06	8.2	56.42	0	31.85	47.5	41.63	17.73	58.81	0	68.09	46.04
YDR157W	3.74	0	12.43	4	3.74	10.13	1	4.05	9.58	1.23	8.05	2.44	6.35	5.34	8.88	19.77	8.57	9.81	20.9	20.71	5.4	15	9.25	16.09		YDR157W	0	0	0	0	0	0	0	0	0	0	0	0	0	0	0	0	0	0	0	0	0	0	0
YDR158W	36.91	19.47	17.78	32.97	29.12	26.79	43.86	44.77	28.37	52.05	43.33	30.31	33.94	44.93	47.64	43.42	46.94	48.04	73.67	48.53	26.83	47.43	90.48	33.15		YDR158W	138.78	46.54	39.1	132.59	53.76	49.32	136.37	15.04	0	83.87	101.44	54.79	31.36	84.75	4.86	56.39	62.47	59.74	13.93	115.5	92.71	27.99	134.33
YDR159W	18.04	11.02	9.08	13.53	12.69	12.4	14.34	12.63	14.87	14.97	13.3	10.22	12.64	13.97	10.46	17.52	14.32	14.92	22.74	15.17	13.46	20.71	21.02	10.02		YDR159W	1.75	1.14	1.22	2.28	1.98	0.92	1.2	0	0	0.45	1.97	1.11	0.93	1.43	0	0.84	1.38	2.41	0.15	2.32	0	1.4	2.54
YDR160W	20.72	9.06	18.53	15.4	20.9	13.69	15.85	22.51	19.14	19.72	22.16	14.8	13.84	17	17.96	19.71	23.23	15.06	28.38	24.05	13.01	17.04	26.12	15.57		YDR160W	0.91	0.9	0.67	0.72	3.11	1.95	0	0	0	0.35	1.86	1.18	0.75	0.48	0	0.83	2.16	0	0.23	0.68	0	0.9	0.84
YDR161W	96.87	34.26	28.76	55.96	58.98	42.46	19.9	39.73	39.19	19.86	45.45	36.2	22.71	31.47	16.35	29.11	24.35	23.24	29.25	24.78	9.66	27.14	39.55	7.62		YDR161W	9.84	23.38	23.1	6.71	48.35	19.76	13.82	7.01	11.58	6.87	38.29	22.21	1.22	22.78	1.81	7.6	15.87	0	7.9	12.54	0	16.59	11.03
YDR162C	247.88	117.75	197.12	170.89	171.94	160.63	201.79	184.51	197.98	185.21	152.16	117.09	146.03	162.56	171.7	147.5	200.54	183.3	162.86	175.04	126.33	193.94	207.76	205.73		YDR162C	5.06	4.59	5.18	14.63	7.16	3.14	4.96	0	0	6.47	5.73	3.38	0	5.92	0	6.05	0	0	1.06	7.36	0	2.68	6.77
YDR163W	350.34	520.19	651.89	441.8	664.32	426.3	552.48	448.61	593.87	477.36	407.37	349.37	444.08	407.91	357.65	304.95	485.32	340.8	278.68	385.83	334.88	512.9	319.53	462.86		YDR163W	1.31	7.86	11.29	5.18	11.14	5.59	4.83	0	0	0	9.8	4.05	3.57	4.61	0	7.93	15.52	0	0	8.18	0	3.71	6.77
YDR164C	15.13	5.91	6.38	8.22	5.76	4.53	11.56	8.59	7.33	9.19	9.1	5.14	6.09	7.55	7.83	8.68	8.37	8.32	14.84	8.51	4.72	6.78	14.25	5.37		YDR164C	2.4	0.48	1.52	4.31	4.39	1.51	4.02	0	0	2.1	8.01	3.44	0.59	4.8	0.44	3.13	2.58	0	0.55	6.26	0	2.24	6.76
YDR165W	104.36	37.66	51.09	77.56	69.14	76.4	37.02	58.57	61.45	34.4	56.11	47.1	49.17	52.03	39.95	49.62	42.51	51.03	44.5	49.28	17.85	46.65	50.13	31.63		YDR165W	14.82	24.41	21.65	14.99	45.77	20.43	22.65	35.71	0	8.02	36.65	24.02	2.59	17.02	3.08	7.46	8.99	0	5.75	20.36	40.02	21.74	20.04
YDR166C	13.05	2.86	7.12	7.02	5.87	5.89	7.44	8.26	5.41	10.72	7.42	4.74	4.59	6.98	7.3	11.48	7.53	7.7	15.35	7.83	6.25	4.48	10.48	5.26		YDR166C	3.34	1.64	1.69	6.39	4.05	1.61	2.69	0	0	1.22	4.64	2.84	0.22	3.49	0.32	2.46	1.88	0	0.4	4.36	5.58	1.57	5.56
YDR167W	316.35	433.2	324.86	363.68	525.11	326.79	330.59	376.35	359.53	358	333.73	298.8	387.96	357.85	326.19	256.33	347.44	252.7	276.28	313.88	262.38	372.44	261.71	280.56		YDR167W	7.16	22.28	16.49	13.72	29.22	13.07	13.55	0	0	3.93	19.46	12.93	2.78	9.88	0	8.88	0	0	3.87	19.76	17.95	11.92	14.07
YDR168W	106.73	138.28	117.06	164.31	160.73	153.53	157.53	159.9	131.12	123.88	130.43	113.18	108.24	166.52	125.27	102.66	114.2	99.64	132.15	131.41	109.05	106.45	95.85	97.28		YDR168W	9.47	8.89	9.64	16.74	13.36	7.47	9.61	10.23	0	13.79	14.64	12.39	4	16.63	1.32	18.87	19.31	13.54	2.88	18.72	17.19	7.27	20.03
YDR169C-A	104.24	0	0	0	0	0	0	0	0	0	112.09	0	0	0	0	0	0	0	37.96	0	0	0	0	0		YDR169C-A	0	0	12.13	0	0	0	0	0	0	0	0	0	0	0	0	0	0	0	0	0	0	0	0
YDR169C	31.88	20.27	16.91	28.27	27.41	22.42	39.44	34.25	29.77	34.1	26.77	21.03	13.44	27.45	24.84	24.18	23	17.81	35.03	23.68	20.41	25.4	40.07	14.29		YDR169C	5.46	4.2	4.52	6.34	6.45	5.99	5.2	5.03	0	4.32	8.73	3.07	0.87	7.62	0.65	5.95	3.8	19.99	1.22	8.01	5.64	3.63	6.08
YDR170C	34.42	16.68	17.6	27.3	22.66	20.66	27.45	24.94	21.88	27.96	23.46	17.11	20.34	30.42	21.11	29.64	27.86	29.38	38.72	27.99	21.72	28.32	33.81	19.47		YDR170C	13.32	4.32	3.19	17.34	10.76	4.7	14.22	8.12	13.41	10.53	20.95	11.77	3.35	14.82	0.3	8.61	7.88	9.21	1.87	16.78	6.5	5.82	20.43
YDR171W	64.35	16.75	26.25	97.24	60.86	33.51	146.47	98.15	60.95	130.21	117.29	90.66	37.93	136.87	101.75	83.65	107.71	80.28	113.59	71.01	54.28	63.61	159.97	48.34		YDR171W	12.55	2.28	4.13	30.79	6.82	3.21	11.28	0	48.1	15.16	17.99	12.75	13.28	31.42	0	41.76	5.5	0	5.28	13.03	0	4.27	14.65
YDR172W	151.94	65.91	54.29	93.37	114.92	83.98	80.37	87.2	88.82	67.34	86.45	69.29	67.5	77.15	50.68	80.85	71.38	63.26	91.89	70.69	38.92	79.3	102.49	51.17		YDR172W	37.62	57.4	49.52	49.28	96.28	57.1	52.28	58.19	24.04	24.51	88.02	79.2	10.11	75.85	4.7	31.83	43.94	38.52	12.6	56.72	52.98	44.7	62.57
YDR173C	43.14	22.38	14.52	33.87	30.57	26.88	46.92	35.29	23.4	32.65	35.11	20.1	29.67	48.67	32.34	50.8	45.06	45.15	52.22	34.48	23.97	49.77	47.52	30.68		YDR173C	1.49	1.89	1.7	3.92	3.84	0.53	4.02	0	0	3.81	4.39	2.14	0	2.62	0	3.54	0	0	0	2.79	0	1.75	2.56
YDR174W	89.27	50.23	57.42	81.28	74.21	67.47	74.98	93.46	70.58	63.37	89.96	82.78	47.57	81.03	52.12	57.89	58.6	49.95	100.41	57.22	36.41	58.45	146.04	42.94		YDR174W	78.86	94.1	84	106.82	150.66	110.64	67.98	62.37	123.66	47.39	235.88	133.13	18.42	171.85	16.13	78.2	75.36	49.54	30.15	68.49	55.92	78.49	73.97
YDR175C	74.23	12.78	42	59.22	32.41	44.19	63.5	42.1	44.02	66.07	38.3	36.46	35.57	44.89	53.12	46.5	48.6	59.59	55.51	49.38	38.18	37.62	71.13	40.24		YDR175C	5.11	6.79	7.59	13.43	9.64	6.34	9.18	8.88	0	3.27	9.25	4.9	2.32	10.46	2.3	6.64	0	0	2.15	9.19	0	4.21	12.03
YDR176W	34.75	23.42	21.58	40.6	31.79	31.6	52.72	40.86	38.25	65.42	40.79	32.17	45.22	51.81	47.68	50.71	53.99	50.87	65.97	58.62	40.75	61.87	69.78	39.33		YDR176W	3.62	1.48	1.51	5.17	2.09	0.84	2.33	0	0	0.87	3.84	2.23	0.31	2.18	0.92	1.54	5.35	0	0.57	3.94	0	1.04	3.63
YDR177W	644.87	680.03	530.11	559.29	651.57	531.85	509.3	465.32	481.36	455.66	386.46	404.41	469.9	420.26	338.37	349.79	454.45	395.85	357.45	336.56	363.8	491.14	296.15	361.89		YDR177W	31.73	35.6	22.86	47.78	71.26	30.7	45.98	0	49.76	35.06	49.63	40.62	18.31	43.9	3.89	33.4	34.11	39.87	7.28	35.95	50.62	27.51	46.3
YDR178W	52.56	5.6	16.97	38.61	18.59	19.05	36.13	34.72	14.95	35.86	25.12	20.7	21.05	35.16	32.91	33.12	25.08	35.42	60.08	21.21	11.06	17.56	37.87	16.47		YDR178W	63.45	25.74	26.85	90.29	36.5	36.42	58.58	19.48	0	62.08	75.21	37.21	11.85	69.91	0	88.79	14.71	25.79	15.7	55.04	109.17	16.26	69.89
YDR179C	60.27	147.54	84.11	92.4	159.63	134.71	117.13	228.5	185.57	273.78	174.72	146.93	491.94	216.89	343.04	227.07	292.55	222.81	266.54	357.05	296.75	350.8	134.86	164.71		YDR179C	0	2.43	0.81	4.7	2.3	1.58	1.1	0	0	0	2.02	0.46	4.05	3.92	0	1.69	0	0	1.88	3.71	0	1.58	4.27
YDR179W-A	21.87	22.82	14.8	23.31	13.68	28.68	25.76	36.27	17.75	47.36	26.03	20.97	60.51	36.59	59.83	50.31	38.29	42.33	47.63	58.6	31.24	45.96	27.01	19.51		YDR179W-A	1.09	0.99	0.35	0.57	0.84	0.19	1.33	0	0	0.69	2.21	1	0.49	0.95	0	0.41	0	0	0	2.25	0	0.51	1.87
YDR180W	14.31	6.36	6.09	10.19	7.35	8.81	8.31	9.97	8.38	10.81	9.6	7.75	6.82	10.19	9.09	10.69	8.12	8.11	12.88	9.76	7.04	11.66	9.79	5.91		YDR180W	2.42	0.55	0.45	0.72	3.27	1.23	0.96	0	0	0.58	3.49	2.42	0.14	3.63	0	0.99	0	2.09	0	2.14	0	1.1	2.08
YDR181C	32.5	15.6	15.51	32.72	22.82	27.79	46.7	35.79	26.86	50.5	29.71	19.07	37.22	33.7	37.36	30.57	28.61	35.43	36.1	33.93	16.26	33.22	28.6	22.92		YDR181C	1.04	0.94	1.18	3.28	2.41	1.29	1.27	0	17.92	1.99	2.59	1.49	0	1.52	0	0.78	0	0	1.31	3.88	0	0.73	2.78
YDR182W-A	92.68	0	34.19	33.01	30.85	89.56	24.66	22.26	35.15	10.12	33.22	10.07	34.94	66.13	30.55	44.49	0	20.26	67.5	32.05	22.28	0	38.16	0		YDR182W-A	0	0	0	0	0	0	0	0	0	0	0	0	0	0	0	0	0	0	0	0	0	0	0
YDR182W	31.94	12.18	17.78	27.82	24.37	20.47	36.42	33.67	29.11	31.18	38.61	24.25	23.22	27.81	26.48	28.43	22.83	23.28	47.24	27.78	14.59	23.37	43.61	15.99		YDR182W	10.48	11.78	8.41	13.87	15.66	6.3	12.19	5.29	0	5.19	15.16	9.9	4.14	16.92	2.05	11.62	11.99	7.01	1.28	17.06	5.93	8.96	16.28
YDR183C-A	294.08	376.28	311.9	219.3	330.37	452.27	149.96	264.9	303.18	160.52	131.76	187.73	180.14	131.14	155.07	214.7	133.28	195.51	116	207.63	123.73	294.66	237.09	184.31		YDR183C-A	0	0	1.9	0	0	0	0	0	0	0	9.46	0	0	0	0	0	0	0	0	0	0	2.46	0
YDR183W	121.02	55.12	85.13	151.23	99.09	120.4	147.75	137.47	125.57	125.45	124.07	115.34	125.26	144.34	137.19	96.75	110.97	107.26	91.12	115.98	79.89	130.71	93.1	94.21		YDR183W	3.5	1.43	2.15	3.45	2.02	0	3.86	0	0	1.68	6.53	3.77	2.38	2.3	0	4.62	0	0	0	3.27	0	2.47	7.51
YDR184C	245.2	215.46	246.43	193.83	251.12	268.89	104.34	170.44	277.57	113.2	121.11	118.08	160.36	92.08	100.11	99.18	96.4	91.29	70.73	131.41	68.72	162.51	132.26	125.57		YDR184C	2.52	22.27	15.65	1.99	29.15	10.72	6.48	0	0	1.21	13.68	7.37	0	2.76	1.27	1.19	7.44	0	0.79	5.49	11.04	12.23	5.05
YDR185C	135.2	74.14	56.73	88.11	65.65	72.35	70.56	85.12	67.82	52.55	65.51	46.49	32.76	89.05	45.39	58.31	51.03	60.4	56.8	56.26	25.72	41.09	46.79	39.51		YDR185C	7.6	9.65	12.97	3.99	19.55	1.35	5.59	19.83	0	9.72	22.36	5.86	1.72	21.12	0	11.95	0	0	1.6	7.89	0	11.18	5.08
YDR186C	40.78	27.95	21.76	21.01	39.89	21.47	40.94	37.11	49.08	69.71	34.9	27.77	32.69	34.18	36.89	32.96	30.37	32.47	62.05	42.63	28.36	49.53	77.35	30.85		YDR186C	7.45	4.54	3.97	8.39	13.14	3.96	6.26	2.78	0	3.06	8.79	3.39	1.45	5.6	0.72	6.77	6.29	0	1.34	7.4	0	4.7	9.15
YDR187C	16.8	30.34	15.77	17.72	29.27	15.69	17.98	14.01	19.11	17.2	27.02	19.62	10.7	8.74	6.45	18.87	14.94	6.51	26.44	13.81	5.85	19.26	25.14	9.08		YDR187C	0	2.94	5.04	3.86	1.66	1.25	0	21.13	0	0	0	7.13	2.52	0	0	0.87	0	0	0	3.08	0	3.26	2.93
YDR188W	52.49	24.29	16.91	39.99	39.29	31.65	28.4	37.34	30.68	31.22	41.8	31.89	17.59	34.35	24.21	25.79	19.92	21.13	39.93	26.83	13.91	26.99	45.19	20.92		YDR188W	46.41	55.09	41.38	43.54	108.72	63.77	54.18	37.51	0	39.07	116.32	67.29	10.84	81.23	4.85	31.24	21.24	43.45	18.51	53.79	47.29	38.4	57.87
YDR189W	34.86	29.14	15.4	38.08	32.22	29.83	43.2	37.53	31.42	50.97	36.58	30.38	42.45	45.74	37.03	40.09	39.11	35.49	50.16	39.09	30.11	54.09	48.44	26.28		YDR189W	12.46	9.39	6.64	16.44	11.84	7.27	13.22	0	6.2	7.82	16.6	11.89	2.93	12.62	0	7.51	0	4.97	2.12	16.87	0	6.09	16.62
YDR190C	171.57	136.93	155.1	136.64	194.02	173.21	111.35	176.28	183.7	98.47	137.69	126.87	101.21	139.08	110.72	116.82	133.11	124.75	131.13	133.28	94.19	140.93	158.14	125.25		YDR190C	30.04	33.3	27.63	24.26	53.92	34.47	29.02	28.34	0	16.67	48.91	41.85	7.88	39.72	1.47	18.17	0	37.51	6.39	29.99	25.4	27.61	33.6
YDR191W	27.44	8.51	4.6	28.43	14.12	22.33	20.13	30.26	17.5	15.52	18.78	23.58	12.69	21.95	16.93	14.97	13.8	18.72	30.28	15.81	9	16.66	24.99	14.29		YDR191W	0.94	6.17	4.13	2.61	6.2	3.52	3.82	0	0	1.81	7.7	4.95	0	4.15	0	4.64	0	0	2.38	3.53	0	2.34	1.35
YDR192C	9.58	2.56	3.08	8.87	3.73	4.93	11.67	8.73	8.06	9.05	8.09	5.8	5.5	7.93	6.63	5.36	1.68	6.21	11.67	6.49	8.19	12.38	17.29	3.73		YDR192C	3.95	2.6	3.32	5.91	7.84	3.36	5.14	6.18	0	0.76	10.19	3.7	0	6.24	0	5.55	0	0	1	4.92	6.93	4.31	6.79
YDR193W	4.59	15.17	0	2.22	4.25	0.96	7.93	4.29	6.68	7.72	6.16	0.47	0	0	1.28	9.88	1.69	1.75	11.78	0	10.02	5.36	2.42	0		YDR193W	0	6.93	2.19	0	3.76	0	2.06	0	0	0	0	1.08	2.94	0	0	4.69	0	0	2.72	0	0	3.12	0
YDR194C	164.74	144.02	99.28	158.36	153.81	176.22	107.85	133.1	140.8	97.56	108.75	87.72	99.53	100.69	95.8	78.71	89.63	95.35	109.49	105.07	71.42	94.97	97.55	112.52		YDR194C	12.26	16.75	19.64	12.51	30.99	23.41	13.62	0	6.22	8.3	16.82	15.86	2.62	12.66	2.43	7.17	2.84	0	4.85	13.18	0	13.67	13.92
YDR194W-A	45.96	0	0	0	0	0	0	49.68	0	0	98.84	0	0	0	0	0	0	30.13	33.47	0	0	0	0	0		YDR194W-A	0	0	0	0	0	0	0	0	0	0	0	0	0	0	0	0	0	0	0	0	0	0	0
YDR195W	26.54	6.93	16.19	14.32	19.74	15.7	16	19.52	23.88	15.43	14.56	15.71	13.78	12.17	12.1	15.6	14.57	13.62	23.54	11.99	10.16	20.41	27.43	7.86		YDR195W	3.38	2.85	3.24	4.13	10.69	2.29	2.94	4.82	0	4.13	6.48	3.23	1.26	7.02	0.62	2.79	0	0	0.78	4.22	5.4	4.24	3.88
YDR196C	186.51	162.37	231.41	301.62	167.76	220.43	342.22	314.87	164.05	337.68	237.26	194.61	246.25	303.52	285.72	252.33	284.82	269.18	250.64	270.29	201.78	239.28	170.39	259.52		YDR196C	7.37	4.46	6.94	14.86	5.06	3.49	13.86	0	0	9.43	6.68	6.06	1.11	8.63	1.66	11.14	0	0	0	4.59	0	3.47	12.21
YDR197W	46.44	14.02	32.05	25.3	24.62	23.59	24.15	27.35	21.81	21.28	19.64	15.82	20.8	24.29	19.96	31	29.12	33.87	31.35	24.63	15.24	26.35	27.71	18.08		YDR197W	6.67	5.81	6.13	5.96	6.86	2.84	4.58	0	0	3.41	7.55	2.06	0.6	3.9	0.9	3.86	0	9.22	1.68	3.88	0	4.4	4.84
YDR198C	37.36	23.51	16.27	29.77	27.21	30.89	19.55	26.04	27.69	24.87	23.05	17.57	23.2	24.47	24.94	28.52	24.89	30.79	25.87	32.61	22.97	34.36	29.24	18.42		YDR198C	1.74	4.36	2.42	1.92	7.52	5.92	2.82	0	0	1.34	5.91	3.65	1.42	2.14	0	1.71	0	0	0.44	3.9	6.11	3.32	2.59
YDR199W	52.02	217.84	93.23	123.14	168.03	127.38	204.42	172.63	185.08	212.73	178.63	103.77	213.3	219.38	183.55	180.81	224.79	162.11	243.47	229.02	204.23	262.72	197.54	226.2		YDR199W	0	1.3	0.23	0	3.5	0	5.39	0	0	0	1.76	0	3.01	0	0	3.48	0	0	0	4.8	0	1.83	5.25
YDR200C	18.61	12.39	8.58	21.95	27.95	23.1	31.92	28.59	26.08	34.85	24.53	23	32.73	36.22	33.01	26.69	26.31	26.01	38.65	34.88	26.38	30.9	30.5	23.62		YDR200C	2.67	1.03	0.89	2.74	2.94	1.28	3.77	0	0	1.03	2.54	3.38	1.14	2.81	0	1.96	3.16	0	0	3	4.69	0.94	3.29
YDR201W	200.79	221.15	199.72	177.89	261.43	181.24	252.23	220.71	213.24	330.47	235.05	167.36	297.49	248.45	236.22	230.61	359.41	213.33	264.69	269.84	306.15	364.69	252.18	264.89		YDR201W	8.66	7.07	4.93	15.95	4.46	2.31	9.56	0	0	16.62	3.92	5.34	1.96	8.87	0	4.36	0	0	0	9.9	0	2.55	13.24
YDR202C	55.3	9.08	34.35	45.59	19.87	31.28	43.59	31.35	19.35	32.61	25.65	20.95	21.06	37.51	31.46	34.96	41.37	36.94	45.7	30.7	21.97	24.17	22.23	17.45		YDR202C	2.96	2.08	3.99	5.96	5.44	4.97	3.71	0	0	0	6.84	2.66	0	4.87	0	8.75	5.96	10.44	1.91	3.54	0	2.49	4.04
YDR203W	46.68	0	0	16.28	6.75	12.89	15.71	11.25	7.74	14.05	12.14	9.42	0	19.22	18.45	5.75	12.85	20.15	19.72	21.83	12.21	0	2.91	18.4		YDR203W	4.06	0.83	1.97	0	0	6.71	0	0	0	13.92	0	3.18	9.87	0	0	0	0	0	0	3.93	0	0	0
YDR204W	29.75	0	11.44	22.08	11.73	9.44	39.74	26.4	9.35	34.15	24.24	14.09	16.47	29.16	24.52	21.87	20.44	22.79	40.82	20.47	13.55	24.09	38.67	12.61		YDR204W	12.27	1.16	4.52	9.68	4.94	3.41	10.21	0	0	11.27	13.77	5.43	5.81	13.12	0	20.76	0	22.13	1.35	13.3	0	2.64	10.09
YDR205W	11.28	6.89	4.26	6.78	5.95	5.2	6.45	6.65	5.47	7.43	9.51	5.89	4.13	6.04	4.79	8.03	2.86	4.62	14.19	6.12	6.38	5.55	12.35	2.27		YDR205W	4.81	5.23	3.79	5.52	5.4	3.84	5.3	0	0	2.1	7.42	5.32	0.89	5.56	0	4.12	5.17	4.53	2.21	4.22	3.83	3.4	6.64
YDR206W	20.01	6.33	4.79	12.07	12.98	10.46	13.01	13.83	11	11.86	14.97	10.29	11.72	12.47	13.09	17.68	12.75	15.22	21.71	15.62	8.03	11.16	22.17	6.82		YDR206W	2.81	1.15	0.62	4.02	7.46	2.99	3.75	0	0	2.7	8.36	2.87	0.48	6.48	0.71	3.52	0	0	1.33	4.49	0	2.61	4.94
YDR207C	15.67	13.46	11.28	12.56	18.55	11.94	16.79	13.74	17.39	17.98	10.72	9.64	10.59	14.07	12.93	13.81	11.67	13.51	28.8	17.96	15.17	18.71	20.57	9.18		YDR207C	2.99	1.02	0.82	2.8	6.34	2.68	4.12	0	0	1.43	4.31	3.51	1.52	3.77	0.38	2.4	2.21	0	1.18	4.42	0	1.91	5.24
YDR208W	39.16	13.63	16.5	26.55	23.75	23.25	38.06	30.57	23.82	40.57	28.63	23.72	31.91	32.04	31.66	32.72	32.31	34.76	45.15	33.27	21.25	34.71	53.19	23.45		YDR208W	6.45	4.5	3.75	8.43	7.32	3.22	7.71	3.16	5.22	7.35	10	4.66	1.92	7.08	0	4.04	0	4.18	1.27	10.43	3.54	3.85	8.21
YDR209C	105.44	135.43	63.39	116.34	73.95	94.71	98.62	118.67	41.21	125.68	80.22	76.76	140.29	90.92	146.37	155.3	83.47	165.72	192.19	156.08	85.77	93.21	68.25	46.81		YDR209C	44.46	48.74	41.73	74.55	68.21	34.2	58.83	62.89	0	65.02	45.44	41.04	8.2	34.81	0	31.85	23.75	0	12.67	71.29	0	30.5	59.85
YDR210W	29.17	100.76	511.28	164.87	49.45	72.6	73	54.73	99.42	66.33	53.5	21.39	228.44	75.5	2.23	107.01	8.37	14.86	0.08	55.81	18.99	63.87	80.73	149.65		YDR210W	97.7	14.51	17.88	16.85	0	0	1.43	0	570.79	2.69	12.62	19.45	0	60.57	0	0	0	228.66	0	7.03	193.57	0	0
YDR211W	92.97	33.08	41.62	64.46	66.5	67.68	45.44	60.55	69.07	47.34	49.29	41.24	40.98	56.32	45.08	46.36	50.24	56.42	55.15	51.48	33.06	50.56	57.41	36.83		YDR211W	12.46	12.36	9.21	13.69	28.69	13.74	11.95	31.37	23.03	10.68	22.97	17.36	3.03	19.15	3.15	8.82	13.16	4.61	1.97	14.97	3.91	12.65	21.3
YDR212W	119.9	43.33	43.73	78.41	63.03	72.09	51.06	59.54	55.75	44.03	54.44	42.32	36.27	66.27	38.05	49.14	44.07	60.23	66.64	51.28	28.87	48.54	54.29	36.94		YDR212W	32.65	38.72	30.38	38.86	71.79	50.73	41.18	0	37.71	26.85	79.2	55.46	4.76	56.05	1.77	26.31	13.79	24.17	10.67	40.32	10.23	32.12	43.45
YDR213W	13.15	6.88	8.93	7.03	11.04	5.54	7.55	8.4	13.68	18.5	12.64	6.33	6.42	9.7	6.26	9.18	10.78	7.05	23.72	15.71	17.46	12.7	16.12	4.33		YDR213W	2.55	1.76	1.25	2.54	4.59	4.88	2	2.66	0	1.63	4.84	2.98	1.62	4.02	0	2.18	2.01	0	0.43	4.44	2.98	2.16	4.28
YDR214W	22.84	15.94	15.76	20.68	23.1	10.83	43.56	30.14	25.81	58	24.88	17.69	30.69	33.97	37.83	46.14	58.08	40.85	68.69	50.16	46.21	45.65	84.63	30.12		YDR214W	27.8	2.48	2.35	37.09	5.07	4.84	29.75	7.92	0	23.28	10.99	7.33	10.32	11.98	0	17.75	5.98	10.48	1.91	25.51	26.62	2.5	35.06
YDR215C	2.36	0	0	5.67	1.76	1.37	0.94	3.82	1.01	5.79	3.8	2.3	2	3.78	6.29	3.39	2.02	1.55	17.16	8.56	12.75	2.83	1.46	7.6		YDR215C	0	0	0.55	0	0	0	1.48	0	0	0	0	0	0	0	0	0	0	0	0	0	0	1.42	0
YDR216W	10.88	4.12	7.58	5.76	5.83	6.31	5.04	8.42	5.44	7.19	4.69	3.74	3.19	5.39	4.58	7.2	3.81	3.35	15.89	6.76	6.54	5.49	8.21	2.38		YDR216W	2.06	1.18	0.66	3.52	6.18	5.6	1.43	1.79	0	0.88	2.88	3.21	0.47	2.91	0.23	1.47	0	0	0.72	3.07	2.01	2.06	2.75
YDR217C	18.13	6.78	7.44	11.05	13.53	13.5	11.87	11.6	14.37	12.94	12.34	8.9	12.44	12.43	10.71	17.55	10.84	11.75	21.66	13.67	12.19	16.33	15.35	7.99		YDR217C	0.93	0.94	0.82	1.28	2.59	1.05	1.7	0	0	0.22	3.22	1.82	0.31	1.83	0.47	1.05	0	0	0	2.24	0	1.02	1.19
YDR218C	2.83	7.25	8.16	3.41	4.24	1.51	6.22	2.55	3.83	9.51	3.05	2.54	5.61	6.06	5.18	4.76	4.87	5.11	16.68	8.33	7.15	9.65	3.79	3.8		YDR218C	0.4	0	0	0	0	0	0	0	0	0	0	0	0	0	0	0	0	0	0	0.5	0	0	0
YDR219C	25.35	8.11	18.24	18.46	18.36	15.43	26.64	23.29	17.12	29.27	14.54	15.08	17.56	20.58	25.19	22.67	25.76	27.43	37.54	21.92	12.34	19.81	20.09	13.62		YDR219C	5.04	1.96	2.41	6.82	3.89	2.11	3.18	0	0	4.84	5.14	3.33	0.98	2.21	0.73	2.86	0	0	0.45	6.06	0	1.4	7.43
YDR220C	0	0	0	2.14	7.98	1.55	2.13	0	9.1	0	11.46	0	0	5.71	1.58	5.76	4.58	5.24	13.59	5.53	17.3	6.41	0	4.3		YDR220C	0	0	0	0	0	0	0	0	0	0	0	0	0	0	0	0	0	0	0	0	0	0	0
YDR221W	16.58	8.15	4.84	11.8	8.74	4.77	15.67	13.62	10.75	19.94	17.11	8.69	15.97	13.91	16.52	19.58	13.21	16.7	30.62	20.5	12.34	17.86	19.82	9.19		YDR221W	4.52	1.48	1.42	3.57	2.44	1.56	6.15	0	0	4.77	4.91	3.07	1.23	3.37	0.46	3.16	2.67	0	0.86	6.06	0	1.12	5.7
YDR222W	13.28	3.71	4.81	12.19	9.04	13.16	27.18	20.88	12.98	33.93	25.19	14.64	31.13	33.08	42.4	43.99	31.94	50.2	32.01	26.06	16.72	27.29	21.77	12.84		YDR222W	7.41	0.45	0	6.17	0	0	11.51	0	0	8.69	11.46	4.95	3.92	5.78	0.83	3.57	0	0	0	10	7.22	0.15	8.49
YDR223W	27.96	4.84	13.26	7.75	11.97	11.7	11.07	10	15.25	20.45	5.88	3.91	6.06	6.97	6.61	9.08	7.94	7.17	18.22	8.94	7.73	12.64	14.02	5.42		YDR223W	0.72	1.17	0.83	0	1.66	0.57	0	0	0	0	0.24	0	0.49	0	0	0	0	0	0	0	0	0.51	0.21
YDR224C	236.6	69.08	93.92	181.35	125.19	175.03	271.81	294.64	165.39	574.47	324.94	330.78	789.1	525.67	672.14	626.52	581.62	857.73	558.7	521.58	283.8	572.03	462.11	279.75		YDR224C	371.6	84.17	96.78	545.17	116.55	70.99	416.27	0	0	492.35	346.67	170.9	116.3	312.08	31.07	122.74	327.38	136.3	26.96	500.96	192.3	76.06	313.61
YDR225W	1078.82	422.29	471.82	752.29	532.26	669.73	995.82	897.4	683.05	2189.65	1064.15	939.55	1798.29	1546.82	2199.54	1574.59	1841.41	2563.95	1413.39	1576.25	1268.38	1679.71	1322.31	1608.69		YDR225W	549.22	125.15	122.68	601.11	171.22	114.42	497.37	42.26	111.71	548.83	394.01	228.42	172.53	338.05	18.36	145.9	160.47	298.34	29.65	489.14	247.96	83.29	361.12
YDR226W	101.87	41.38	50.11	82.93	51.67	63.74	97.65	68.16	53.34	95.85	95.63	57.45	53.94	80.18	89.53	84.22	62.02	89.42	147.98	91.14	40.82	63.51	158.43	64.28		YDR226W	258.11	74.01	71.65	299.25	135.44	94.35	256.79	129.47	47.54	188.62	240.2	145.59	62.48	189.53	11.16	157.47	108.63	152.35	27.81	274.73	193.45	59.05	256.42
YDR227W	14.31	7.52	6.94	9.74	11.25	10.04	11.89	12.57	12.21	12.96	10.82	8.3	8.98	12.16	12.87	16.28	12.45	13.54	23.12	16.74	10.88	13.98	12.59	6.95		YDR227W	0.78	1.76	1.38	1.41	2.49	1.01	1.23	1.74	0	1.71	2.34	1.44	0.15	0.59	0	0.59	1.32	2.31	0.28	2.15	0	0.9	1.91
YDR228C	49.85	19.66	20.55	39.95	36.09	32.13	43.03	39.4	33.7	42.19	27.21	26.36	33.98	38.68	29.3	34.16	38.28	36.03	44.2	37.03	23.46	42.8	44.64	24.76		YDR228C	1.8	3.08	2.5	5.26	5.97	3.84	3.97	8.04	0	3.94	5.5	2.14	1.05	5.18	0	3.2	0	0	0	3.2	0	2.63	4.71
YDR229W	41.6	3.34	14.46	24.26	21.53	18.44	40.16	32.96	18.77	38.74	28.81	21.51	18.47	28.91	25.46	26.04	22.82	23.71	46.32	27.34	23.09	25.14	55.42	21.06		YDR229W	4.08	4.45	3.8	6.15	2.29	2.17	3	0	0	4.27	4.54	2.17	1.01	2.61	0	4.49	4.39	7.7	1.87	3.24	0	3.8	4.68
YDR230W	90.04	18.55	32.36	52.96	22.78	28.03	88.32	58.68	18.29	46.81	37.71	27.79	41.54	55.65	39.84	76.61	45.76	57.54	75.05	40.79	44.59	45.07	59.43	42.05		YDR230W	13.02	0.3	1.67	16.59	14.44	4.63	14.79	0	0	15.03	9.41	5.52	11.39	15.67	0	17.85	0	0	2.95	16.64	0	8	17.23
YDR231C	33.28	11.97	6.56	21.38	9.11	11.41	38.08	28.15	13.1	23.15	13.9	15.54	12.92	15.8	16.32	14.11	8.65	14.43	34.95	15.6	15.54	14.51	15.45	8.43		YDR231C	12.89	8.31	3.35	14.42	10.77	4.39	11.42	0	0	4.54	12.75	4.07	1.56	14.33	0	11.94	0	0	1.55	6.92	0	3.71	4.5
YDR232W	43.21	29.55	16.84	30.42	45.33	37.53	39.38	43.12	45.08	30.25	36.12	30.79	22.26	33.7	31.03	30.36	22.53	26.61	47.01	35.39	20.44	26.08	61.15	22.56		YDR232W	32.8	30.19	24.97	37.16	78.49	53.31	44.53	32.68	0	30.33	74.52	49	6.49	43.98	2.42	27.13	14.1	30.91	7.52	41.8	0	34.54	35.04
YDR233C	139.71	98.79	63.48	103.71	128.32	77.59	113.27	120.02	108.54	117.76	147.47	152.45	59.87	127.88	95.09	84.46	58.73	74.25	164.93	88.49	42.16	74.27	200.25	73.48		YDR233C	177.95	91.77	56.49	191.28	105.45	62.69	200.99	68.69	64.85	143.1	226.84	119.79	37.51	174.4	2.54	157.81	74.1	77.94	25.3	176.86	120.96	53.78	178.87
YDR234W	19.1	6.2	9.38	10.89	13.7	10.45	9.13	13.67	14.69	12.56	13.45	11.97	13.92	8.64	9.5	12.4	11.32	9.09	18.32	13.54	9.32	11.32	23.43	6.72		YDR234W	11.01	10.11	6.86	9.22	18.41	10.13	16.53	7.18	5.93	5.72	15.88	10.6	2.5	9.26	0.93	3.2	5.42	14.26	2.6	14.14	0	7.69	10.65
YDR235W	58.21	40.63	43.93	54.85	39.37	63.31	49.56	54.92	43.5	53.38	41.73	32.26	43.39	55.32	59.96	45.73	46.66	58.76	59.61	57.65	33.97	44.54	36.39	36.39		YDR235W	4.51	6.87	3.9	4.98	4.64	1.76	3.76	0	0	4.62	5.31	2.5	0	3.7	0	2.84	0	0	1.14	4.5	0	2.97	4.83
YDR236C	107.3	50.96	97.33	130.31	82.02	115.44	137.74	128.54	97.21	120.64	113.6	88.7	90.07	143.25	121.4	106.74	100.69	124.4	131.31	125.67	68.22	130.35	116.81	113.21		YDR236C	16.02	7.7	6.31	14.13	6.55	3.51	8.32	0	0	7.24	15.37	9.59	1.28	11.59	0	5.34	22.3	0	0	6.46	16.54	5.66	7.56
YDR237W	49.55	25.74	34.63	49.56	31.81	44.71	45.2	52.75	36.55	47.95	38.86	30.97	46.13	42.26	46.85	49.63	37.75	45.19	75.42	52.56	29.02	45.69	46.47	46.23		YDR237W	8.89	7.26	6.76	13.02	9.8	9.46	11.68	0	0	8.53	10.78	5.09	1.73	9.48	1.29	8.39	0	0	2.4	16.61	0	5.38	11.28
YDR238C	22.7	11.43	8.03	19.09	11.98	13.11	18.64	22.02	13.41	22.21	21.61	15.37	14.83	19.91	20.14	21.84	14.54	18.67	41.12	19.69	14.09	14.54	32.17	10.65		YDR238C	27.75	16.4	13.39	39.65	26.07	12.99	31.73	7.45	4.1	19.78	40.92	27.08	7.77	30.21	1.93	21.61	30	26.3	5.8	37.05	13.91	11.09	40.53
YDR239C	13.92	5.39	5.44	7.88	12.27	7.12	9.9	7.71	10.48	11.04	7.17	6.52	9.92	6.01	7.36	13.9	11.25	8.59	17.98	12.26	10.13	9	18.64	5.47		YDR239C	1	2.82	2.04	2.83	4.31	2.23	2.2	6.25	0	0.38	2.84	1.66	0	1.05	0	1.66	2.36	0	0.5	2.86	3.5	1.9	3.31
YDR240C	56.01	15.19	20.37	23.47	18.97	29.6	24.48	25.03	28.7	25.86	17.03	17.61	19.47	20.76	19.61	21.52	16.32	24.53	27.67	26.69	15.84	21.89	30.06	16.27		YDR240C	1.69	6.06	4.47	1.06	5.21	3.95	2.98	5.28	0	1.94	3.44	2.81	0	1.48	1.37	1.15	3.99	0	0.85	4.41	0	3.34	3.29
YDR241W	48.28	130.82	56.57	70.55	119.11	92.2	70.27	132	87.23	89.29	82.45	63.87	115.62	118.54	134.77	63.39	82.92	83.8	113.75	144.3	110.61	136.59	73.66	77.81		YDR241W	0	2.64	1.32	0	0	0	0	0	0	0	0	0	0	0	0	0	0	0	0	3.02	0	0	0
YDR242W	11.7	1.34	6.96	8.39	4.97	5.26	11.7	8.68	6.7	11.66	6.38	6.66	10.96	8.41	10.56	14.08	10.49	11.45	17.8	12.86	7.18	9.24	11.43	6.47		YDR242W	0.6	0	0.2	0.23	0	0	0.22	0	0	0	0.4	0.09	0	0	0	0.34	0	0	0	0.93	0	0	0.17
YDR243C	22.13	16.12	22.53	20.07	19.12	21.54	21.66	22.18	19.3	27.78	16.5	11.85	22.75	17.64	24.15	26.99	25.53	26.17	25.53	28.83	13.28	25.25	16.36	15.62		YDR243C	1.93	1.35	1.77	3.04	2.55	0.73	1.62	0	0	1.59	2.62	1.7	0	0.48	0	0.94	3.26	0	0	2.74	0	1.17	3.63
YDR244W	24.25	7.12	12.82	17.95	19.9	14.78	24.9	19.03	22.4	24.13	15.12	14.35	14.15	16.53	15.12	17.57	17.51	14.69	28.35	14.74	9.36	19.69	27.85	8.96		YDR244W	2.37	4.16	3.34	4.57	9.96	2.66	2.9	0	0	3.03	5.54	3.17	1.07	2.54	0.53	4.17	3.11	5.46	1.33	4.92	4.62	2.98	3.92
YDR245W	127.05	61.33	66.74	102.85	102.29	93.97	59.65	87.19	93.88	99.76	100.59	70.81	72.57	83.29	74.91	77.01	92.06	80.43	102.09	97.58	52.42	78.08	101.85	58.56		YDR245W	10.98	11.48	10.26	18.71	26.45	13.56	14.86	0	0	6.74	24.76	11.78	2.39	12.34	0.89	5.8	5.19	18.21	1.66	20.52	0	9.77	18.13
YDR246W-A	164.98	0	0	61.7	164.75	70.14	35.11	47.55	18.77	118.87	59.14	96.8	18.66	47.08	26.1	79.2	56.67	7.21	104.12	91.28	71.4	132.24	54.34	35.45		YDR246W-A	0	0	0	0	0	0	0	0	0	0	0	0	0	0	0	0	0	0	0	11.68	0	0	0
YDR246W	46.71	16.87	32.84	33.47	47.74	17.84	40.79	39.8	37.98	40.49	31.91	32.78	21.44	28.82	36.84	25.72	29.26	23.42	54.82	33.07	29.73	26.43	75.33	21.25		YDR246W	3.75	12.24	9.59	10.34	13.01	2.99	8.96	14.67	0	5.39	10.81	5.2	2.55	11.51	0	11.32	0	19.42	4.73	8.17	0	9.92	7.52
YDR247W	16.43	8.19	6.38	15.56	11.19	9.16	28.96	19.15	11.29	23.69	19.51	13.77	9.77	26.04	19.75	28.28	24.19	22.67	30.77	20.81	8.31	12.83	20.3	7.91		YDR247W	3.64	1.98	2.78	4.3	2.81	0.58	5.62	0	0	2.09	4.2	0.79	1.48	2.55	0	7.28	0	0	0.46	6.57	0	1.93	4.17
YDR248C	82.02	76.17	52.7	86.93	68.36	73.62	126.17	124.4	69.41	124.12	74.68	64.68	90.88	116.09	116.53	113.35	134.04	132.28	155.58	138.61	115.92	114.52	68.62	103.4		YDR248C	4.51	7.36	3.54	15.12	5.22	1.2	4.98	17.65	29.17	4.33	5.36	4.52	0	4.95	2.28	5.53	13.33	0	0	2.81	0	1.19	5.17
YDR249C	34.86	6.32	14.58	16.06	14.39	16.87	15.99	18.1	13.58	15.37	17.41	12.35	13.04	12.63	14.33	15.42	13.2	14.04	22.79	15.66	13.66	17.16	18.3	5.31		YDR249C	0.94	1.53	1.6	1.11	2.89	1.49	0.69	0	0	0.9	2.86	0.14	0	0.82	0	0.88	0	9.7	0	1.75	0	0.5	2.14
YDR250C	3.25	0	0	0	4.87	0	2.6	0	2.77	0	3.5	0	0	3.48	5.79	2.34	5.59	12.8	14.21	16.87	7.04	0	4.02	0		YDR250C	0	0	0	0	0	0	0	0	0	0	0	3.42	0	0	0	0	0	0	0	0	0	0	0
YDR251W	22.17	5.93	8.8	18.14	15.98	11.46	26.7	18.17	16.22	19.53	24.33	13.71	9.21	21.74	13.76	21.71	20.04	14.95	33.32	18.1	14.81	17.23	30.14	13.01		YDR251W	3.39	1.84	1.93	9.2	7.12	3.51	5.4	14.74	0	1.44	9.2	5.92	2.05	6.61	0	7.53	0	0	2.37	5.75	3.3	3.59	6.69
YDR252W	17.16	0	10.05	11.32	9.07	9.36	25.78	16.36	14.64	23.8	13.02	5.92	18.83	19.44	23.35	27.62	24.27	27.13	27.93	31.41	13.1	14.56	28.67	9.76		YDR252W	3.44	1.87	1.41	13.57	1.33	0	1.27	0	0	0	3.5	2.65	0	13.59	0	3.25	0	0	0	2.14	0	0	4.93
YDR253C	14.78	0	13.39	16.69	11.07	12.86	53.63	47.94	29.24	58.1	14.45	5.91	58.13	17.98	54.21	47.9	42.7	48.91	103.74	41.13	40.71	35.55	59.75	47.65		YDR253C	0	0	0	0	0.88	0	0	0	0	0	0	0	0	0	0	1.73	0	0	0	0	0	0	0.66
YDR254W	24.3	13.21	14.99	18.61	12.24	13.09	25.92	22.08	14.31	24.93	17.81	13.25	27.36	28.54	29.98	28.96	23.64	33.14	44.16	29	27.45	29.48	21.51	13.52		YDR254W	2.2	0.6	0.3	3.18	0.57	0	1.62	5.74	0	2.11	1.49	0.9	0	0.32	0	1.52	0	0	0.92	2.28	0	0	1.89
YDR255C	30.15	7.29	37.83	21.5	15.29	15.97	30.32	21.04	17.42	43.85	24.25	13.23	18.93	24.14	26.48	27.87	21.2	24.13	41.49	35.96	30.31	21.12	29.62	17.98		YDR255C	1.62	0.44	1.27	2.23	1.56	0.86	2.38	6.34	0	0.78	2.47	0.87	0	2.84	0	2.9	0	0	1.02	0.76	0	0.86	3.02
YDR256C	17.09	2.88	9.35	9.63	12.66	12.74	7.34	12.58	12.02	13.28	10.9	8.63	6.69	8.24	8.91	11.36	5.81	9.24	13.54	10.33	7.72	9.93	12.52	3.03		YDR256C	0.64	0.52	0.48	0.5	0.49	0.34	0	0	0	0	0.22	0.2	0	0.56	0	0.24	0	0	0	0	0	0	0
YDR257C	62.64	21.17	37.93	42.15	31.28	44.54	25.94	30.24	34.62	24	30.08	21.19	21.05	32.04	24.31	23.69	16.24	27.77	30.27	24.73	8.52	19.42	28.22	21.27		YDR257C	4.7	8.41	5.82	4.77	14	7.68	4.45	0	17.37	4.51	8.66	7.45	1.37	5.9	0	2.92	0	6.96	1.69	3.77	0	6.52	5
YDR258C	22.65	8.69	7.52	23.14	14.59	9.78	40.13	31.95	17	36.83	24.96	17.39	18.25	39.99	35.27	34.57	37.54	38.09	58.96	29.14	25.73	30.77	42.38	20.26		YDR258C	7.72	1.16	1.98	11.87	1.19	1.44	8.23	0	0	8.89	6.16	2.5	4.46	7.79	0.78	13.77	6.85	4	0.73	6.97	10.16	1.5	9.74
YDR259C	11.16	6.12	7.94	7.46	19.51	14.33	12.73	16.67	23.36	21.15	10.29	6.24	29.31	12.52	15.61	21.25	28.3	22.48	28.07	20.41	20.71	26.85	24.29	17.56		YDR259C	0	0.25	0	0.71	0	0	0	0	0	0.87	0	0	0	0	0	0.17	0	0	0	1.69	0	0	0.52
YDR260C	119.4	6.19	48.21	57.54	82.17	51.92	41.21	57.56	59.88	57.07	54.65	43.39	24.63	37.99	39.24	36.02	33.25	33.86	35.25	42.69	24.44	25.22	70.74	41.61		YDR260C	9.62	20.96	18.97	8.68	30.78	19.02	9.1	0	0	5.28	17.74	9.33	0	12.07	0	6.23	0	28.5	1.73	9.42	0	7.77	7.88
YDR261C	7.65	3.92	1.69	5.72	5.86	4.24	8.96	9.56	7.25	14.03	12.07	9.31	10.09	10.74	14.93	15.06	11.97	15.94	35.16	17.64	9.93	13.08	20.37	10.96		YDR261C	9.85	0.63	0.28	13.03	1.57	0.31	10.44	0	0	7.23	5.31	3.57	1.18	3.56	0.59	2.19	3.43	6.01	0.37	13.72	5.08	0.41	12.79
YDR262W	64.15	12.55	23.06	40.27	38.56	33.64	34.57	50.35	26.14	32.92	38.22	31.96	17.33	42.42	34.18	29.42	17.54	24.92	50.88	28.4	13.26	18.67	48.95	19.75		YDR262W	9.05	33.36	31.3	17.58	41.39	18.53	15.88	0	0	8.02	27.43	21.47	3.79	17.12	2.82	17.88	16.47	0	7.03	18.66	0	22.38	14.37
YDR263C	6.02	0	0.77	3.15	3.47	2.55	4.62	5.01	1.78	6.83	5.48	4.3	5.89	4.46	4.4	4.17	2.78	4.71	10.79	5.77	6.01	3.34	6.01	1.12		YDR263C	0.39	0	0	1.25	0	0	0.29	0	0	0	1.61	0	0.54	0.35	0	0.6	0	0	0	0	0	0	0.68
YDR264C	24.41	6.5	4.41	14.63	12.85	10.3	17.56	16.46	12.27	18.29	15.34	11.94	10.87	14.36	14.12	14.36	13.7	13.31	25.44	18.56	9.94	13.37	20.9	8.38		YDR264C	10.09	5.49	3.57	8.29	7	3.07	7.73	9.68	0	5.14	10.77	6.99	2.24	11.03	0	5.29	0	4.27	1.3	11.17	7.23	4.07	8.38
YDR265W	27.04	14.32	8.26	14.45	11.17	16.76	16.37	22.85	12.73	24.74	15.04	10.33	23.73	20.96	26.17	19.47	12.81	24.25	36.44	26.44	9.42	17.94	21.11	13.53		YDR265W	3.18	1.73	2.17	6.27	2.45	1.69	5.85	0	0	1.02	2.88	0.49	0	0.93	0	3.2	0	0	0	1.98	0	0.94	2.13
YDR266C	30.62	19.21	13.68	21.7	33.51	18.18	25.38	23.39	24.36	18.08	25.96	19.29	24.22	21.42	16.07	25.65	23.01	19.11	33.44	28.25	13.38	22.65	32.18	11.86		YDR266C	6.52	9.42	8.64	9.89	15.69	10.28	10.52	15.71	0	3.85	14.14	10.44	0.34	10.57	2.03	5.4	5.93	0	3.8	9.69	0	8.95	11.36
YDR267C	156.01	34.29	83.68	77.47	66.43	79.54	48.13	64.84	51.45	52.66	53.52	38.69	46.54	50.54	45.61	51	63.56	64.02	68.08	46.34	31.76	56.77	65.02	41.65		YDR267C	9.24	8.58	8.39	12.87	15.53	10.71	7.2	0	0	9.39	16.62	9.05	1.48	10.98	0	3.7	12.86	0	2.74	9.15	9.54	10.18	6.23
YDR268W	12.38	8.27	4.47	4.31	2.42	4.68	4.94	5.24	4.36	7.41	6.95	3.69	6.39	9.22	6.71	9.5	5.55	8.65	14.9	8.94	4.66	4.53	7.31	3.9		YDR268W	5.51	1.25	1.25	3.62	2.83	1.71	3.38	0	0	0.88	2.8	1.98	0.62	3.22	0	3.12	5.43	0	0.58	1.72	0	0.97	4.21
YDR269C	0	0	2.87	0	1.78	0	0	0	9.58	0	1.09	0.45	0	2.39	0	3.3	2.57	0	5.54	0	0	0.82	0	2.71		YDR269C	2.59	1.54	8.14	0	4.91	4.83	4.04	0	0	0	3.55	0	0	0	0	1.61	0	0	0	1.51	0	1.87	0.24
YDR270W	9.83	2.76	3.58	3.48	4.21	2.91	5.19	4.22	4.25	6.06	3.95	2.17	2.93	3.85	4.18	6.1	3.6	3.56	12.38	6.05	4.8	4.53	6.4	2.13		YDR270W	1.12	0.44	1.02	2.18	2.21	1.01	0.75	0	0	0.29	1.4	0.52	0.83	0.98	0	0.69	0	0	0.19	0.82	0	0.74	1.08
YDR271C	36.2	11.24	7.72	20.76	15.74	19.63	34.65	29.44	28.83	25.07	13.65	18.7	26.88	42.18	26.65	34.33	22.57	13.16	38.74	38.25	23.32	24.27	31.51	3.53		YDR271C	2.39	1.18	0.4	1.98	2.94	1.33	3.27	0	0	0	3.39	3.08	0	6.01	0	2.62	0	0	0	1.08	0	3.35	3.75
YDR272W	221.35	248.54	224.37	211.76	180.03	185.57	292.62	306.19	167.45	276.33	191.03	165.41	180.53	261.59	304.15	215.05	209.89	252.59	242.83	238.04	201.39	197.55	140.94	189.13		YDR272W	14.48	25.53	27.41	27.74	31.41	24.22	25.88	0	0	21.18	29.98	23.39	9.38	26.64	1.4	35.42	8.16	0	7.83	24.06	0	15.35	17.79
YDR273W	18.88	8.65	12.16	15.58	17.73	9.64	17.32	12.79	16.35	14.12	13.03	11.3	4.3	13.27	7.86	10.55	9.68	6.65	16.21	7.31	6.71	9.49	18.1	5.9		YDR273W	0	0	0.07	0	0	0	0	0	0	0	0	0	0	0	0	0.18	0	0	0	0.9	0	0	0
YDR274C	136.18	179.87	243.08	42.24	151.34	158.75	11.69	85.47	168.66	162.57	59.83	51.55	47.19	29.78	20.85	20.03	22.63	23.04	105.57	37.98	31.68	63.38	68.72	37.76		YDR274C	2.5	6.79	8.18	0	3.85	17.26	1.84	0	0	0	3.39	3.85	3.4	0	0	0	0	0	0	0	0	9.7	1.43
YDR275W	253.82	271.28	328.82	180.67	298.94	257.95	264.55	288.89	359.65	242.54	164.83	145.52	215.28	248.21	283.72	173.1	210.27	189.28	170.71	269.01	204.61	240.56	170.26	161.22		YDR275W	5.09	2.77	3.82	2.01	1.31	1.35	9.98	0	0	6.51	6.91	0.78	1.15	5.21	0	13.13	0	0	1.07	12.68	29.77	1.2	5.35
YDR276C	6711.41	6133.87	6543.31	5783.88	3550.43	5110.67	4612.69	4375.78	3249.31	4291.36	4095.35	5443.19	2800.94	5729.13	5261.02	4832.76	4345.35	6618.6	3937.16	4365.55	2881.37	2882.02	3815.57	3519.59		YDR276C	5491.92	3434.82	2883.18	5119.89	3714.2	2777.78	5543.01	2132.4	0	4355.25	7583.67	4534.71	1543.75	6216.78	735.34	4216.08	4831.1	5645.86	1087.99	4524.99	1593.11	1907.68	3798.51
YDR277C	31.01	14.11	17.54	33.5	29.93	23.3	37.21	41.71	29	50.55	31.36	26.95	14.8	37.36	47.82	39.53	37.08	34.79	58.71	47.18	24.85	18.23	76.3	24.43		YDR277C	5.87	7.25	5.19	9.26	1.51	1.87	6.05	12.26	0	3	3.19	1.09	2.66	6.53	0	4.14	4.63	8.11	1.48	11.46	6.87	4.01	11.22
YDR278C	438.53	1242.06	1477.16	528.84	567.58	329.52	314.33	262.32	699.25	506.15	430.36	689.05	509.15	209.6	184.37	545.71	497.23	273.59	316.25	366.61	681.72	537.51	378.6	881.71		YDR278C	3863.69	1860.61	2066.16	2149.21	2965.99	3430.85	3282.89	2840.74	3473.32	3397.64	2286.68	4113.51	11776.6	3026.07	12732.5	1883.61	4118.98	5490.55	13671.6	3219.01	6430.58	1595.3	3556.08
YDR279W	25.51	15.94	16.74	17.12	11.55	15.82	21.07	21.8	14.93	14.28	16.91	23.21	15.6	28.25	25.16	20.29	17.32	22.56	26.57	20.31	10.27	14.27	13.56	18.64		YDR279W	7.08	3.85	2.21	5.98	3.51	2.42	7.07	0	0	2.91	11.33	5.14	0	8.88	0	3.63	5.98	0	1.28	5.98	0	2.86	4.35
YDR280W	271.64	127.13	216.41	185.78	202.65	240.01	126.82	165.67	190.88	118.39	123.13	97.16	130.29	131.22	119.97	123.55	136.75	143	116.23	169.97	96.82	156.74	127.5	144.23		YDR280W	6	17.33	19.03	12.79	32.91	15.02	7.07	9.4	0	10.37	22.02	14.26	3.27	17.4	2.43	6.8	14.2	0	4.55	9.73	0	14.63	10.67
YDR281C	642.04	1173.59	1196.34	1239.04	1468.73	1402.79	1458.89	1744.45	1345.23	1135.04	1181.21	800.83	1352.1	717.52	1176.29	525.22	813.89	425.29	326.02	808.82	637.92	1165.84	631.13	890.43		YDR281C	22.33	30.39	40.16	8.81	60.34	47.5	30.12	0	0	7.14	45.5	39.02	5.06	35.94	15.07	16.86	0	0	9.39	25.51	0	39.44	19.2
YDR282C	45.77	20.45	24.12	31.25	27.21	31.17	46.97	33.77	22.11	36.88	22.66	13.5	27.11	29.81	32.9	25.64	21.21	28.43	35.1	21.61	17.82	20.38	14.06	16.78		YDR282C	1.65	1.57	1.86	2.6	4.14	2.2	2.13	0	0	1.58	2.24	2.16	1.12	2.17	0	2.03	0	8.56	0	2.57	0	1.31	2.84
YDR283C	20.98	8.54	8.62	10.7	8.73	8.57	8.08	7.73	11.26	9.94	7.29	5.75	7.37	6.58	6.79	12.93	9.37	9.87	16.94	9.23	8.48	10.19	10.01	4.53		YDR283C	1.99	1.52	0.65	2.64	3.9	2.11	1.59	1.41	0	0.52	3.86	2.51	0.25	3.17	0.55	1.5	1.07	0	0.68	2.64	3.17	2.17	3.16
YDR284C	117.03	46.37	51.39	103.47	37.32	54.94	91.3	62.85	35.43	85.31	63.74	48.36	57	74.75	67.19	58.18	57.06	72.78	85.78	58.75	58.82	60.83	53.62	49.28		YDR284C	25.09	4.9	6.24	32.48	12.91	9.93	25.56	10.08	0	8.64	31.9	19.44	4.38	27.68	0	21.87	30.44	0	4.06	26.06	11.29	7.27	25.08
YDR285W	27.64	25.62	32.2	24.82	40.15	37.55	30.97	35.28	41.54	37.5	22.88	18.26	36.09	28.57	26.29	24.93	27.58	27.29	31.21	27.48	24.15	36.11	24.86	22.52		YDR285W	0	0.68	0.1	0.28	0.14	0	0	0	0	0	0.36	0	0	0.16	0	0	0	0	0	0.22	0	0.19	0.2
YDR286C	124.93	106.56	86.41	88.99	80.57	82.48	132.95	131.29	59.21	129.56	93.29	62.78	100.07	77.99	101.9	121.19	128.14	92.16	144.05	91.8	93.86	108.48	85.72	100.67		YDR286C	8.87	8.05	8.08	4.67	6.85	0	13.05	0	0	0	4.02	3.65	0	5.19	0	11.17	0	61.3	0	14.74	0	3.13	10.17
YDR287W	21.61	5.72	8.66	12.54	7.25	6.05	21.11	15.3	11.44	23.06	20.03	6.56	12.01	14.75	17.02	16.1	12.8	14.41	29.03	15.85	5.64	8.96	35.89	7.81		YDR287W	4.44	2.77	2.52	6.51	5.88	5.07	5.14	0	0	6.09	3.88	1.96	4.32	3.34	0	5.99	7.51	0	1.6	9.1	0	0.9	5.09
YDR288W	176.93	180.02	168.68	209.55	259.7	181.06	192.26	195.1	181.27	185.71	159.32	135.15	168.75	191.64	128.99	140.97	187.33	140.01	133.77	135.64	119.16	176.86	117.16	119.67		YDR288W	3.03	2.64	3.23	4.3	8.88	3.87	0.89	18.96	0	2.32	4.52	2.8	2.47	5.85	1.23	3.43	7.16	12.55	0	1.51	0	3.42	5.9
YDR289C	104.67	96.2	91.37	103.44	112.25	97.54	127.5	107.03	111.07	122.42	91.71	66.04	91.57	128.92	106.63	118.54	140.29	124.16	126.01	121.93	82.41	113.45	109.64	100.06		YDR289C	4.19	2.96	3.75	7.11	5.21	2.67	3.39	0	10.84	1.61	3.7	3.01	0.57	4.04	0	4.14	0	17.36	0.53	6	0	1.63	5.49
YDR290W	15.5	0	12.84	15.53	14.51	11.24	26.25	22.99	19.8	22.84	6.12	7.56	9.84	8.28	12.65	19.47	16.39	8.89	24.01	16.09	4.18	9.3	7.17	12.35		YDR290W	3.3	7.18	5.15	10.4	5.11	7.02	0	0	0	6.32	2.24	0	4.48	11.57	0	3.92	0	0	0	4.11	0	1.16	7.76
YDR291W	22.87	8.97	11.08	13.18	11.38	12.82	12.59	11.64	13.74	12.71	11.4	6.77	7.5	11.97	9.66	15.03	10.18	12.7	20.18	11.69	7.77	10.64	16.7	6.73		YDR291W	1.28	1.24	1.5	2.69	2.86	1.82	1.36	0	0	1.09	2.51	1.58	0.19	0.75	0	1.18	0	0	0.72	1.86	0	1.51	1.79
YDR292C	58.51	17.5	26.74	37.87	26.18	32.24	26.56	28.09	27.49	34.04	28.11	19.32	22.43	24.72	24.88	31.73	26.88	34.28	42.38	29.8	13.81	30.33	35.1	12.98		YDR292C	9.58	6.49	5.98	11.44	14.2	9.23	12	16.22	0	5.47	14.95	11.74	1.76	8.19	1.05	5.28	3.06	0	1.31	9.84	0	5.85	12.02
YDR293C	33.71	9.85	8.99	21.02	19.97	13.26	23.84	19.57	18.24	18.35	19.85	14.85	10.52	23.95	14.29	18.89	18.24	16.55	31.98	15.75	10.8	14.06	28.08	7.93		YDR293C	12.27	4.17	4.07	14.28	15.85	10.02	12.87	9.51	0	4.66	24.83	14.95	3.47	20.26	1.23	13.53	8.62	7.56	2.61	13.78	8.53	7.59	14.69
YDR294C	54.34	21.04	17.67	46.65	41.54	35.99	47.36	40.96	44.02	38.02	46.82	38.95	25.71	48.49	33.19	39.59	39.33	36.37	54.37	31.95	27.56	31.8	52.78	25.99		YDR294C	15.94	7.03	7.73	16.47	24.82	13.02	14.76	12.91	0	15.82	23.33	14.49	4.11	20.03	2.78	15.88	3.25	0	2.77	18.15	0	9.51	16.38
YDR295C	10.27	7.46	4.15	11.67	8.31	7	13.4	10.8	8.17	12.27	9.4	6.78	7.06	9.65	11.01	11.19	7.39	14.1	16.87	10.51	6.6	7.67	12.51	6.26		YDR295C	3.07	1.67	1.84	2.42	3.83	3.15	2.26	3.7	6.12	1.36	4.01	2.77	0.32	2.28	0	1.79	13.98	4.9	0.89	3.68	8.3	1.92	2.98
YDR296W	38.89	8.07	12.21	35.8	25.98	29.56	46.14	37.49	26.01	39.24	29.95	24.67	32.99	30.37	29.31	32.17	31.59	42.39	58.94	29.44	13.65	41.71	59.72	17.79		YDR296W	17.91	19.51	19.33	19.78	24.89	18.11	15.81	14.03	0	22.35	18.25	8.84	3.66	14.94	3.63	11.84	21.19	0	3.39	20.65	0	11.07	17.46
YDR297W	60.13	36.56	43.49	39.36	42.8	45.21	34.45	56.63	59.68	63.76	69.77	64.33	54.03	59.89	58.45	39.01	36.3	46.84	69.37	61.46	33.49	46.53	105.52	35.02		YDR297W	75.59	51.93	55.16	57.63	84.59	50.76	48.52	31.78	78.76	41.86	90.97	52.25	13.8	59.24	5.14	15.71	18	10.52	13.44	70.18	0	36.37	67.76
YDR298C	70.82	17.68	15.29	56.75	18.11	32.04	70.77	55.39	21.12	50.91	40.24	32.09	26.37	44.98	46.45	51.82	37.57	52.47	81.76	51.96	16.2	24.92	74.66	22.27		YDR298C	135.4	43.8	40.48	123.06	71.2	49.61	139.32	61.46	25.39	143.11	123.29	75.34	41.38	112.86	3.97	107.44	11.6	101.71	11.14	105.77	17.22	36.04	115.86
YDR299W	266.12	92.68	110.67	125.18	176.2	154.7	82.69	94.85	158.64	95.59	82.73	69.6	105.14	56.31	59.64	67.46	75.19	65.92	49.6	79.82	65.89	99.65	95.02	73.46		YDR299W	6.45	18.05	14.32	6.3	29.64	14.55	8.58	14.43	31.78	7.66	12.1	11.27	1.67	5.66	0.62	2.2	14.53	6.37	6.59	10.33	0	14.86	9.15
YDR300C	57.51	12.51	21.64	43.47	32.09	38.2	24.9	33.72	30.99	32.48	27.79	25.05	21.72	24.17	22.38	27.5	21.59	27.18	33.74	31.89	13.1	26.32	38.25	19.14		YDR300C	7.94	16.2	11	9.39	18.69	13.3	13.14	12.43	0	10.66	15.63	12.48	2.16	10.8	0.8	6.14	4.69	16.45	3.5	12.12	6.96	10.65	15.01
YDR301W	14.77	6.02	7.38	10.69	14.3	11.64	11.58	13.5	13.49	12.52	13.64	9.59	13.53	11.26	10.86	17.51	14.37	12.69	21.61	16.62	9.76	19.81	21.8	12.75		YDR301W	1.78	2.06	1.81	5.01	3.78	3.56	2.38	0	8.65	1.5	3.86	2.4	0.61	3.13	0.45	1.64	0	2.31	0.42	4.65	0	2.2	3
YDR302W	132.98	160.31	105.82	126.38	122.64	161.2	122.8	173.44	132.21	234.32	121.13	128.43	205.07	159.96	200.8	176.48	172.71	165.03	204.09	257.68	175.98	196.89	149.31	185.09		YDR302W	6.56	10.2	6.4	19.21	13.01	7.48	13.09	29.33	0	3.59	13.36	3.47	3.82	11.51	11.38	5.66	0	0	1.18	9.34	0	5.62	13.96
YDR303C	31.32	28.47	17.79	24.19	38.27	33.51	29.77	38.86	31.64	24.39	30.91	21.06	29.36	31.75	29.76	31.23	26.19	32.9	46.29	36.12	24.97	37.9	35.24	16.1		YDR303C	5.44	5.93	4.32	7.06	9.35	5.89	6.33	5.5	4.54	5.05	8.7	4.76	0.96	4.78	0	3.05	10.38	3.64	0.89	8.53	6.16	5.27	8.65
YDR304C	253.32	166.47	189.63	295.82	162.39	222.29	294.21	261.82	151.16	260.32	222.36	208.42	178.52	284.13	277.02	204.12	178.02	258	284.23	215.08	175.08	203.48	177.01	225.01		YDR304C	71.21	51.53	44.13	113.05	55.74	39.35	86.25	56.46	0	64.55	126.12	66.26	34.4	93.38	9.13	99.57	42.64	37.37	14.78	97.73	15.82	32.79	94.06
YDR305C	82.4	25.65	24.03	64.25	52.54	54.87	71.1	77.63	51.78	81.51	65.26	49.54	66.11	84.02	64.4	75.77	65.02	69	97.71	61.23	42.16	70.96	92.14	38.58		YDR305C	6.64	3.1	3.63	8.98	7.33	2.52	9.77	0	0	3.64	7.73	4.1	5.16	7.5	0	5.73	22.44	0	1.2	8.87	0	5.03	10.33
YDR306C	74.07	28.28	78.13	42.8	20.54	34.76	43.44	33.84	24.27	38	30.81	21.41	30.2	37.01	36.42	33.89	28.82	45.08	39.34	31.84	25.68	26.08	28.05	24.07		YDR306C	3.49	4.18	3.72	5.78	5.12	3.15	1.54	0	0	2.68	5.45	3.66	1.9	6.12	0	4.74	8.25	0	0.88	5.87	0	3.2	4
YDR307W	20.8	13.04	9.87	30.85	16.11	16.33	37.84	26.92	14.37	34.48	30.13	23.8	20.41	41.95	34.92	27.11	25.52	32.76	36.48	33.48	19.29	23.48	20.45	17.79		YDR307W	7.24	1.44	1.75	5.9	4.47	0.64	5.68	3.78	0	2.78	9.17	5.21	1.64	8.68	0	6.37	5.7	0	0	8.27	0	1.45	8.43
YDR308C	211.48	217.05	270.34	246.51	284.59	270.12	345.71	370.4	286.57	317.78	251.73	224.5	429.71	366.73	423.99	379.48	446.73	400.44	383.78	497.46	393.97	492.24	303.09	477.52		YDR308C	15.42	9.44	13.16	16.72	8.93	17.44	15.6	0	0	7.4	11.78	6.54	5.24	6.77	3.9	8.01	0	0	2.43	19.21	33.82	6.81	17.68
YDR309C	9.04	6.12	13.24	7.88	7.96	2.47	19.09	12.36	11.11	20.63	24.58	23.39	17.13	18.78	19.08	13.21	15.07	10.46	24	23.44	18.98	15.98	29.22	10.28		YDR309C	8.61	0.49	1.18	8.58	0.7	0	9.67	0	0	2.61	18.46	10.76	1.23	15.51	0	4.79	5.36	0	0	14.11	0	0.64	10.13
YDR310C	17.37	9.11	5.06	12.56	18.91	9.28	14.61	15.75	17.64	11.15	13.03	9.61	7.19	10.52	9.2	10.07	10.19	7.61	23.38	13.54	11.37	11.82	22.18	4.64		YDR310C	3.32	2.99	1.66	5.24	5.02	3	4.25	0	0	1.66	4.41	3.96	0.79	4.69	0	2.29	1.71	2.99	0.91	5.22	0	2.8	5.38
YDR311W	62.67	49.46	57.37	74.16	68.21	78.86	75.85	71.23	72.21	69.78	55.74	40.81	66.07	78.83	66.54	62.53	78.21	77.1	66.22	76.71	59.88	70.43	56.42	68.91		YDR311W	3.24	3.8	2.8	4.13	8.28	4.38	3.67	0	0	1.92	6.61	2.69	1.36	3.51	0	2.92	2.95	0	0.31	4.82	0	2.38	5.15
YDR312W	125.16	97.73	115.1	89.51	156.17	130.78	53.75	109.67	149.7	66.65	73.54	69.61	102.41	66.75	65.34	71.68	73.41	69.66	62.07	93.04	53.95	101.29	70.89	75.48		YDR312W	3.76	10.43	7.53	2.81	9.79	5.08	3.62	5.81	0	3.77	4.89	7.1	0	1.86	0	0.96	4.39	0	0.94	4.77	0	6.36	4.17
YDR313C	73.47	20.56	44.47	34.96	37.83	43.93	40.01	42.6	47.34	39.48	32.51	26.94	28.56	38.09	31.33	39.4	29.57	36.63	56.85	40.89	38.09	35.89	51.04	27.14		YDR313C	3.91	3.91	3.03	3.09	6.04	2.08	4.32	0	0	2.5	5.32	0.6	0.89	1.72	0	1.23	0	0	0	1.63	34.34	2.53	2.24
YDR314C	7.01	5.17	6.71	4.43	4.24	3.52	5.7	4.52	5.17	7.28	6.09	2.76	2.74	5.77	4.4	12.13	8.56	5.92	16.39	8.39	6.41	7.45	6.82	2.82		YDR314C	0.46	0.13	0.19	0.36	0.53	0.24	0.51	0	0	0.44	0.16	0.21	0.62	0	0	0.52	0	0	0	0.57	0	0.08	0.66
YDR315C	31.71	48.09	39	34.51	27.56	31.55	50.94	57.98	21.38	47.32	25.68	24.89	40.51	49.03	48.08	48.21	30.93	39.79	62.73	43.46	40.67	46.14	29.5	23.98		YDR315C	0	0.73	0.73	1.58	1.55	1.42	1.47	0	0	1.28	1.81	1.85	0	0.59	0	1.76	0	0	0	4.16	0	0.94	1.53
YDR316W	81.6	52.73	69.8	85.74	71.4	86.4	103.17	72	78.85	93.05	57.97	47.63	78.03	72.62	65.69	75.39	102.24	91.58	89.59	89.4	65.31	84.09	77.38	88.9		YDR316W	1.42	3.86	2.71	1.68	3.56	2.83	2.09	0	0	2.72	2.41	2.52	0.97	2.8	0	2.14	4.2	0	0.45	3.98	0	1.75	2.24
YDR317W	18.16	11.16	8.84	10.48	10.88	9.55	14.3	13.35	11.98	16.66	12.5	9.47	19.31	10.89	15.66	16.92	9.57	14.93	23.45	17.09	12.58	13.39	12.26	7.03		YDR317W	0.41	0.9	1.13	0.65	0.64	0.66	0.91	0	0	1.58	1.12	0.64	0	0.72	0	0.31	0	0	0.52	1.29	7.24	0.87	0.71
YDR318W	52.45	42.84	46.31	70.65	38.45	60.49	91.74	87.15	50.94	121.43	65.4	50.47	96.07	104.5	103.6	83.37	98.7	99.7	96.1	103.04	74.25	83.86	64.78	64.3		YDR318W	0.95	1.29	0.58	2.63	0.73	0	2.1	0	0	0	1.29	1.32	0.65	0.83	0	1.62	5.62	0	0.6	1.78	0	0.34	1.91
YDR319C	39.25	12.43	25.53	21.4	10.91	17.36	25.84	20.56	12.43	25.45	25.24	11.08	13.04	26.85	26.17	26.23	17.38	32.9	41.55	27.29	23.64	20.44	19.99	10.43		YDR319C	2.07	1.88	2.83	2.72	9.05	1.1	3.04	0	0	3.97	5.62	2.98	0	3.03	0	3.39	0	0	0.87	9.02	0	2.44	8.3
YDR320C-A	441.57	876.72	556.09	542.99	592.99	790.06	565.11	1168.57	597.58	822.81	769.55	707.27	1278.51	977.75	1391.01	1162.21	849.9	1307.92	2056.91	1366.41	675.41	988.63	601.78	846.61		YDR320C-A	77.85	56.51	77.99	112.58	90.15	69.05	105	0	0	24.9	123.37	24.01	17.65	79.74	0	44.09	0	0	32.74	105.1	0	32.08	126.43
YDR320C	13.45	6.45	6.05	7.19	13.01	5.93	10.96	11.96	9.92	12.53	12.66	10.69	7.37	9.45	10.06	12.11	8.42	7.17	25.3	12.06	12.43	9.43	21.11	5.65		YDR320C	4.06	3.25	1.92	3.58	4.06	0.89	5.27	0	0	3.21	8.11	2.58	0.32	5.45	0	4.6	2.82	0	0.6	3.42	0	1.77	4.38
YDR320W-B	93.39	0	0	74.84	0	108.28	0	0	0	91.75	100.42	0	158.41	0	0	201.74	160.39	122.47	136.02	96.89	404.14	224.57	0	0		YDR320W-B	0	0	0	0	0	0	0	0	0	0	0	0	0	0	0	0	0	0	0	0	0	0	0
YDR321W	44.94	22.59	16.87	38.37	41.27	31.02	22.63	33.25	35.15	21.03	36.53	35.05	23.6	33.21	18.88	27.16	24.35	27.19	36.04	27.47	16.79	23.8	37.99	11.64		YDR321W	40.12	32.51	24.29	40.28	72.85	38.58	46.62	28.56	0	34.12	95.99	49.06	8.06	55.64	3.69	26.68	26.96	28.35	13.8	50.28	40	28.02	48.61
YDR322C-A	1358.64	2787.1	2483.7	1961.57	2414.09	2158.91	2504.64	2592.35	1905.36	1551.06	1943.06	1702.46	2612.56	1904.42	2005.13	2344.83	2342.87	1814.22	2147.07	2139.97	1767.47	2050.27	1576.1	2335.9		YDR322C-A	121.86	109.73	98.61	133.1	213.49	119.73	120.69	146.81	0	125.93	165.54	112.74	51.01	107	9.49	132.74	55.43	0	29.57	128.5	0	72.84	169.26
YDR322W	22.67	2.15	15.8	8.97	10.48	10.39	14.07	14.22	10.99	11	7.83	7.66	13.29	10.78	9.63	15.72	10.1	11.56	23.85	11.33	7.27	12.79	25.24	10.83		YDR322W	14.31	12.99	9.84	13.55	12.52	7.36	7.37	0	24.69	5.49	8.42	7.8	1.3	5.03	1.93	5.22	0	0	2.41	9.21	0	6.07	10.39
YDR323C	29.86	15.86	13.72	28.44	12.1	21.56	49.16	31.26	23.87	46.86	26.45	18.91	40.14	25.32	38.32	35.16	34.19	41.13	46.5	36.04	23.57	42	24.35	26.94		YDR323C	1.28	0.35	0.83	1.26	1.48	0.34	3.06	0	0	1.84	1.3	0.49	0	0.84	0	1.33	0	0	0.4	2.79	0	0.79	2.75
YDR324C	82.94	45.61	51.28	76.84	97.71	89.55	46.18	80.14	94.79	47.05	60.31	54.96	64.9	52.39	50.89	55.19	57.14	57.26	47.68	66.2	37.54	72.86	67.5	55.53		YDR324C	6.48	18.52	13.61	7.83	34.55	16.16	12.96	0	15.72	8.94	23.24	17.17	2.2	13.33	0.82	3.82	7.18	4.2	5.36	12.87	0	12.3	13.46
YDR325W	20.03	7.35	10.99	9.98	15.26	12.67	14.11	15.81	19.84	23.61	14.05	9.79	22.16	19.48	24.8	25.4	25.87	25.3	31.14	24.12	20.54	21.36	18.5	11.23		YDR325W	2.67	1.29	0.71	2.69	2.64	1.18	1.86	2.32	0	2.56	2.62	1.42	0.4	1.43	0.3	0.67	1.76	0	0.19	2.96	0	0.94	4.25
YDR326C	23.44	10.86	6.54	14.74	22.21	16.26	12.27	16.42	17	17.41	17.07	15.04	14.3	14.35	12.92	18.56	15.95	14.52	25.85	19.47	13.04	18.05	24.46	9.42		YDR326C	3.56	3.6	3.38	5.13	8.01	2.17	3.01	4.93	0	1.21	6.62	4.3	0.29	3.13	0.21	2.02	0	0	1.06	6.14	7.36	3.85	5.47
YDR327W	297.8	343.58	192.38	232.6	216.27	210.61	178.25	269.38	126.29	210.17	238.58	149.88	183.57	290.79	164.06	200.71	208.51	155.42	244.65	208.22	135.56	144.11	131.12	153.67		YDR327W	58.09	46.55	31.41	59.61	83.8	60.77	31.79	0	0	38.18	97.98	72.49	12.98	71.78	6.83	58.22	0	69.92	15.99	87.23	0	33.19	64.36
YDR328C	434.8	762.74	550.66	529.75	641.96	586.1	496.65	656.95	487.25	431.32	553.2	508.64	463.46	542.73	492.19	374.83	468.5	394.28	419.74	537.59	433.61	436.71	382.87	556.15		YDR328C	27.71	50.94	34.5	41.99	49.92	39.37	39.65	35.03	28.94	32.42	67.02	33.9	7.87	45.92	0	46.58	0	0	18.69	42.16	39.26	29.68	38.28
YDR329C	107.67	32.79	71.64	72.59	44.78	50.04	77.5	53.7	42.96	68.9	54.14	40.88	43.47	61.1	49.2	51.96	50.19	67.95	66.46	51.07	41.34	48.65	71.62	44.92		YDR329C	4.98	5.21	3.24	3.63	8.58	6.11	4.23	0	0	3.68	7.81	2.95	1.56	4.71	0	5.35	0	0	1.45	6.92	0	5.41	7.69
YDR330W	38.08	13.42	9.67	33.63	22.99	20.72	32.41	26.25	16.91	22.9	19.64	14.82	8.9	21.41	15.44	15.53	11.68	13.63	29.28	13.3	8.41	13.55	27.11	11.58		YDR330W	6.62	5.59	6.42	7.83	9.46	7.58	5.11	10.37	0	5.72	7.87	5.72	1.8	11.34	0	8.13	0	0	1.25	5.98	5.81	6.2	6.45
YDR331W	34.93	16.88	11.35	25.65	20.13	25.35	16.57	23.76	16.26	19.2	20.75	17.2	12.02	20.39	18.26	14.42	10.07	17.46	34.51	17.23	8.46	9.99	18.71	7.87		YDR331W	13.74	9.07	6.03	14.78	14.46	10.41	12.25	13.04	0	10.39	17.81	13.09	1.13	11.33	0.84	6.92	0	8.63	1.58	14.01	7.31	7.21	11.93
YDR332W	19.09	8.32	8.99	10.09	8.52	10.68	13.72	13.03	9.7	13.3	9.17	8.87	13.55	10.87	12.69	14.62	15.35	14.03	25.14	13.34	8.79	14.98	16.55	5.02		YDR332W	0.92	0.63	0.82	1.09	1.6	0.49	0.85	3.61	0	0	1.1	0.43	0	0.61	0.93	0.61	0	0	0	1.15	0	0.41	0.93
YDR333C	43.65	14.79	14.07	26.13	22.12	27.24	27.87	24.29	20.48	27.75	22.23	15.82	23.52	23.5	20.18	25.7	22.27	25.43	36.37	28.24	12.78	25.63	31.08	15.11		YDR333C	7	7.62	5.86	5.7	11.15	5.24	3.86	3.43	0	0.84	9.81	6.68	3.27	4.61	0	4.38	2.59	0	1.1	8.32	11.52	4.17	6.77
YDR334W	34.74	13.42	19.74	24.8	27.76	21.76	21.91	18.9	24.47	18.96	18.99	16.19	11.57	16.66	13.49	19.85	18.22	16.82	28.06	16.87	12.36	15.98	23.47	11.37		YDR334W	0.6	1.14	1.07	1.33	4.37	1.53	0.8	1.56	0	0.19	3.85	2.05	0.95	2.27	0.4	1.01	0	0	0.63	1.61	0	1.37	1.77
YDR335W	23.98	13.43	20.32	21.55	25.09	22.18	31.29	26.07	24.25	30.57	22.1	19.46	25.71	28.39	21.53	28.97	36.64	27.62	35.82	25.55	28.7	39.96	40.05	23.25		YDR335W	6.09	1.89	1.71	7.45	5.85	3.17	5.94	1.95	3.21	4.53	8.27	6.01	1.35	6.87	0.5	5.53	2.94	0	1.72	7.66	0	3.64	8.9
YDR336W	156.88	198.13	145.44	137.42	159.21	168.52	128.74	161.87	132.69	175.49	109.91	101.61	143.43	126.47	140.4	120.3	139.97	138.94	134.77	135.28	105.81	157.6	116.17	98.51		YDR336W	2.89	3.78	3.32	3.2	3.57	1.54	2.13	0	0	2.22	2.75	1.96	0	3.05	0	3.5	0	0	2.19	5.41	0	2.04	3.98
YDR337W	88.4	55.82	54.63	61.94	69.36	81.2	66.28	76.52	74.44	62.04	61.72	41.91	53.23	66.35	69.46	65.86	67.69	78.29	116.48	88.52	65.41	87.42	87.43	78.94		YDR337W	15.65	7.81	9.89	16.46	13.59	7.98	11.99	10.21	0	5.01	10.63	10.05	2.66	6.3	0	7.63	7.71	0	0.82	14.63	0	4.38	14.21
YDR338C	38.22	16.47	16.47	22.35	26.51	21.61	18.4	22.61	24.02	18.71	25.96	14.29	18.65	20.85	18.54	22.02	23.72	20.01	29.59	21.7	17.99	25.8	25.17	16.64		YDR338C	1.37	3.61	2.59	3.43	4.41	2.31	2.86	0	0	1.75	4.19	2.47	0	2.21	0	2.59	0	4.74	1.15	2.28	0	1.61	3.14
YDR339C	174.8	204.44	217.63	232.01	188.19	207.43	128.62	165.33	207.97	124.78	129.23	114.18	121.62	110.35	112.2	104.24	93.82	110.14	99.45	135.3	96.04	110.01	103.73	143.06		YDR339C	22.11	74.76	51.03	20.19	67.38	36.54	27.4	0	0	13.4	47.42	28.71	11.08	23.5	4.71	14.06	41.29	0	11.74	37.7	0	40.28	30.68
YDR340W	114.48	37.4	80.87	83.94	94.86	83.32	83.6	105.32	147.55	98.12	89.06	157.21	111.56	122.52	127.15	78.93	100.4	107.01	134.71	101.08	163.39	93.72	87.23	141.32		YDR340W	8.3	4.52	9.64	9.82	12.81	0	3.05	0	0	0	0	0	5.65	0	0	3.12	0	0	0	5.09	0	8.79	2.38
YDR341C	92.29	15.56	23.81	45.1	32.46	37.96	26	27.3	30.99	19.45	35.04	25.92	14.02	28.2	16.83	26.16	19.28	23.92	30.77	20.86	9.44	11.62	37.16	10.05		YDR341C	51.81	57.28	44.06	54.07	91.68	47.65	58.25	49.93	20.62	43.85	108.63	78.16	14.1	78.38	4.3	48.86	40.85	27.54	14.41	57.94	32.64	43.91	66.7
YDR342C	598.47	190.32	360.02	217.12	140.29	159.41	292.32	141.76	152.18	223.45	129.38	119.52	106.44	180.27	178.88	167.45	183.71	230.55	294.66	189.25	126.97	127.03	309.14	218.16		YDR342C	271.36	142.93	77.06	379.42	173.99	77.6	234	81.23	54.48	186.22	129.2	119.54	132.95	243.48	10.25	433.49	68.18	77.64	71.71	273.96	143.33	138.13	290.61
YDR343C	50.43	42.35	48.82	29.29	12.23	17.99	9.31	33.7	17.43	61	14.22	11.41	11.35	11.84	28.58	11.31	22.95	13.23	32.81	10.82	27.9	19.44	41.43	14.94		YDR343C	0.01	0.01	37.07	27.1	0.01	0.01	0	0	54.48	0	0	0.01	0.01	0.01	10.25	0	68.18	77.64	0	0.01	143.33	0.01	0.01
YDR344C	4.14	0	3.43	4.14	3.1	0.6	3.3	0	7.06	3.05	0	1.01	1.75	2.21	3.68	1.49	0	1.36	10.54	4.29	4.47	2.49	5.11	5		YDR344C	0	1.92	0	0	0	0	0	0	0	0	0	1.63	0	0	0	0	0	0	0	0	0	0	0
YDR345C	36.89	73.49	10.6	55.85	40.39	63.13	83.48	87.5	58.6	78.31	74.72	62.49	76.2	68.3	97.19	73.61	61.56	84.11	100.68	90.5	52.54	86.9	183.95	50.07		YDR345C	77.74	85.66	31.84	72.78	106.29	93.22	110.63	35.08	9.15	57.1	111.72	84.12	12.97	62.95	5.96	51.95	54.43	74.5	13.78	93.14	48.42	22.21	97.76
YDR346C	346.36	159.08	200.99	178.75	219.39	181.37	83.66	109.35	220.81	124.35	100.7	93.57	82.7	92.62	72.19	78.11	96.3	87.92	83.88	81.56	69.89	94.77	114.16	81.19		YDR346C	20.43	49.01	37.84	18.3	97.55	47.17	28.78	10.84	0	13.95	63.49	52.63	4.24	34.05	1.4	10.98	12.28	14.36	16.6	25.24	24.3	42.55	25.6
YDR347W	24.44	17.75	6.58	12.97	12.86	18.96	18.19	13.57	18.88	12.33	19.18	10.34	11.2	9.19	14.11	20.22	8.51	14.94	27.42	13.7	6.43	10.33	26.11	12.24		YDR347W	12.95	12.26	14.61	18.2	23.03	11.98	14.08	8.81	0	5.4	16.44	6.6	1.53	10.38	3.42	9.78	6.66	0	2.13	14.38	0	8.55	13.23
YDR348C	44.39	11.96	15.52	35.11	46.37	27.77	49.11	43.15	43.69	55.1	50.04	38.46	32.04	47.3	40.54	37.3	34.11	33.96	56.01	43.63	28.65	43.08	72.63	28.24		YDR348C	11.28	7.05	4.35	11.52	9.73	5.3	10.01	0	0	2.55	16.23	7.27	0.9	13.99	0	7.14	3.92	0	0.84	11.17	11.65	5.51	10.27
YDR349C	30.07	9.77	7.92	17.09	18.83	17.99	13.21	22.7	20.36	18.14	19.34	20.38	11.07	12.77	15.2	15.35	10.11	14.4	28.04	18.16	11.36	10.71	22.99	5.64		YDR349C	4.34	6.35	5.45	8.56	20.1	7.22	10.17	4.25	0	4.16	15.47	7.36	2.58	7.38	0.55	3.89	3.21	0	1.71	7.77	0	7.28	7
YDR350C	40.81	18.86	19.49	29.31	30.67	29.99	33.88	36	28.76	31.78	26.13	24.02	29.17	40.17	33.44	33.22	37.27	41.08	40.06	31.58	26.58	36.43	40.29	30.8		YDR350C	1.86	1.65	1.11	1.28	4.13	2.35	1.71	0	0	1.79	2.53	0.93	0.32	2.25	0	1.32	0	0	0	2.03	12.25	1.48	2.13
YDR351W	32.25	20.29	21.41	23.64	31.99	25.56	25.57	27.43	27.51	25.97	24.44	17.37	25.11	23.99	24.27	31.14	29.96	27.18	35.42	29.29	18.76	32.04	37.61	16.02		YDR351W	2.16	3.14	1.97	3.13	5.42	2.21	2.65	0	0	2.77	6.73	4.5	0.25	3.01	0	3.4	2.13	3.74	0.91	3.93	0	2.67	4.96
YDR352W	43.28	10.3	14.48	19.63	13.57	14.39	19.01	15.96	19.47	22.42	19.48	10.83	21.06	16.52	20.5	26.09	12.68	24.64	32.99	23.32	17.42	25.82	21.13	8.11		YDR352W	16.01	10.27	6.64	11.73	17.22	10.35	13.46	0	0	14.27	16.31	10.4	0	10.54	0	6.91	13.53	11.85	5.05	16.39	0	7.67	14.42
YDR353W	113.18	48.56	47.52	92.03	72.3	81.63	82.1	87.08	74.41	67.37	82.69	65.76	50.82	78.38	74.64	61.12	57.74	72.03	88	65.62	32.41	64.04	90.86	61.16		YDR353W	84.53	81.54	68.74	90.84	105.99	72.16	115.18	44.42	0	54.44	134.86	77.32	29.33	119.05	3.45	77.12	80.51	23.52	20.76	86.6	79.65	58.11	81.62
YDR354C-A	0	0	0	0	0	0	0	0	0	0	0	0	0	0	0	0	0	0	0	0	0	0	0	0		YDR354C-A	0	0	0.02	0	0	0	0	0	0	0	0	0	0	0	0	0	0	0	0	0	0	0	23.46
YDR354W	36.5	22.66	15.15	24.95	35.77	25.05	29.99	31.33	31.14	37.18	31.17	24.67	34.59	33.03	28.81	39.8	36.87	36.78	49.05	38.98	31.94	64.53	63.3	38.49		YDR354W	12.81	7.22	4.87	17.68	9.53	4.62	12.11	7.16	0	6.14	14.29	7.47	1.24	6.83	0	6.04	5.41	18.96	1.15	11.4	0	4.68	13.54
YDR355C	7.68	0	8.75	9.06	0	2.94	8.11	2.73	2.14	20.77	16.07	0	12.89	11.46	9.31	3.86	4.37	8.37	13.4	2.7	16.63	6.23	0	0		YDR355C	4.59	0	0	10.01	1.24	2.03	0	0	0	0	0	7.77	4.79	10.15	16.81	4.98	0	0	0	0	0	2.02	8.06
YDR356W	29.87	10.33	14.33	36.53	23.46	20.94	65.11	47.36	34.43	106.16	45.46	34.21	63.72	67.02	63.6	67.04	67.66	57.39	65.19	61.81	35.32	85.03	49.26	37.48		YDR356W	1.46	0.45	0.34	2.71	0.46	0.44	3.01	0	0	1.57	3.67	2.02	0.7	2.62	0	1.66	0	0	0	3.88	0	0.44	2.78
YDR357C	186.27	251.68	192.95	306.9	234.37	242.76	409.13	431.68	225.03	358.7	274.01	295.81	310.91	369.99	410.16	348.73	299.43	327.33	425.39	408.13	312.76	365.51	294.47	338.62		YDR357C	5.08	2.77	4.16	24.04	11.76	8.11	11.21	0	0	19.49	18.97	9.4	0	11.15	0	12.47	0	0	3.2	9.49	0	4.48	7.28
YDR358W	56.16	11.87	35.35	49	20.84	23.6	66.07	37.13	26.67	45.56	32.5	26.87	20.98	53.49	33.32	34.87	39.53	41.89	54.78	34.39	28.24	24.37	42.42	26.02		YDR358W	4.1	0.8	2.88	8.54	2.26	2.34	3.88	0	0	2.81	5.96	3.61	0.8	6.68	0	11.05	3.46	0	0.74	3.65	5.14	1.55	5.7
YDR359C	9.74	4.24	3.36	10.44	9.28	4.49	18.04	10.04	9.8	10.45	10.79	8.19	6.08	11.21	6.78	10.19	8.69	7.16	19	8.79	6.61	8.59	21.53	3.41		YDR359C	1.41	0.6	0.31	2.97	1.94	0.4	2.66	0	0	1.51	4.47	1.95	0.47	3.58	0	2.17	0	0	0.2	2.93	0	0.74	2.87
YDR360W	5.68	0	0	1.36	1.24	1.8	2.22	1.34	2.11	4.84	2.38	1.18	3.8	4.93	0	6.46	2	1.08	10.81	3.4	4.28	5.72	3.68	3.56		YDR360W	0	1.99	0.67	0	0	1.13	2.6	0	0	0	2.62	1.53	1.93	0	0	0.99	43.27	0	0	1.2	0	1.73	1.15
YDR361C	188.93	139.98	130.09	137.72	168.51	127.52	63.47	97.7	154.24	70.13	93.44	81.94	88.84	68.51	72.72	76.26	71.96	64.61	50	93.37	44.49	89.56	89.12	55.64		YDR361C	13.88	41.39	28.81	10.95	53.59	34.13	23.83	20.71	205.29	27.91	40.86	27.11	2.7	20.32	0	6.74	7.82	13.71	10.01	21.42	0	23.12	17.05
YDR362C	44.54	14.96	9.7	17.51	19.6	15.49	23.44	18.51	16.74	24.21	16.61	10.34	16.06	16.39	17.01	22.65	19.84	19.17	34.87	20.65	16.87	19.41	23.72	13.23		YDR362C	1.9	0.9	1.07	2.43	4.03	1.77	1.75	0	0	2.28	2.26	1.39	0	2.29	0.96	0.99	0	0	0.3	3.1	0	1.01	2.72
YDR363W-A	1153.94	2791.92	2647.01	2020.42	2477.47	2232	2188.08	2139.37	2344.58	1824.27	1887.62	2188.49	1554.07	2121.94	1964.41	1324.45	1567.47	1554.58	1525.36	1556.06	2027.78	1934.04	1088.33	2141.51		YDR363W-A	53.63	71.38	56.17	56.41	119.62	53.91	57	93.33	0	34.31	117.38	97.4	24.32	68.02	24.14	58.51	0	0	22.56	66.84	209.17	16.84	61.49
YDR363W	25.94	4.98	9.33	17.32	16.51	12.16	18.8	17.29	16.6	25.91	16.73	11.2	14.67	13.42	16.41	19.3	17.81	21.68	29.28	18.39	11.22	14.55	28.83	11.15		YDR363W	1.84	1.2	1.21	2.62	2.56	0.98	1.36	0	0	2.12	4.25	2.27	1	2.59	0	0.97	0	0	0.46	2.98	0	1.04	1.69
YDR364C	70.43	9.98	30.22	28.48	18.18	31.78	27.85	23.89	25.7	26.19	17.48	11.87	18.75	21.1	19.28	18.41	21.59	20.46	26.04	21.81	13.13	15.63	21.68	16.07		YDR364C	5.17	2.61	3.33	4.08	8.55	2.16	3.8	5.78	0	2.13	6.77	4.33	1	3.57	0.75	2.09	0	0	1.4	3.68	0	2.22	4.02
YDR365C	224.06	77.19	116.09	126.64	186.58	105.97	66.24	101.71	167.86	81.1	121.68	100.82	75.61	86.41	45.14	74.46	79.64	53.73	63.82	71.93	40.92	85.53	109.17	47.64		YDR365C	7.67	32.17	23.16	7.67	59.63	29.81	11.67	24.03	0	6.87	39.26	30.44	2.44	24.03	2.07	6.57	3.02	10.6	4.84	12.11	13.47	21.5	11.88
YDR366C	151.99	194.48	130.36	128.31	149.88	179.63	116.36	179.25	175.9	225.15	125.64	167.58	177.12	134.36	155.06	179.8	127.07	131.06	220.67	135.27	157.61	179.43	140.86	87.33		YDR366C	0	12.93	16.82	14.71	13.33	9.19	3.65	0	0	5.2	14.66	19.64	11.84	10.91	0	7.83	0	0	8.17	14.27	0	10.68	22.05
YDR367W	30.38	29.15	16.21	24.78	17.06	20.76	27.28	31.08	13.42	30.38	22.75	24.4	24.84	29.61	32.82	30.86	17.7	30.95	55.7	26.45	11.74	24.78	33.5	16.61		YDR367W	28.66	12.58	12.38	21.88	14.27	7.38	19.72	0	47.84	7.1	33.28	13.11	3.77	21.1	0	19.55	10.93	0	4.67	27.07	48.67	8.16	22.26
YDR368W	47.24	13.14	20.46	48.28	21.02	28.98	66.94	46.25	20.44	50.11	42.33	29.79	27.87	55.69	47.72	38.21	39.39	40.85	62.32	38.36	27.41	29.64	47.78	27.03		YDR368W	39.67	15.25	17.77	51.08	16.66	21.11	45.93	0	0	42.55	38.04	25.01	16.67	42	14.18	53.97	6.9	12.1	9.57	43.26	81.91	11.95	42.47
YDR369C	11.14	1.64	7.11	10.21	6.9	6.83	18.71	13.19	6.58	17.46	8.64	5.76	13.98	13.87	13.34	17.35	13.42	16.36	19.96	18.88	10.89	12.87	10.05	8.46		YDR369C	0.55	0.7	0.52	1.01	1.13	1.46	0.67	0	0	1.05	1.36	0.34	0.25	0.8	0	0.9	0	3.78	0	1.24	0	0.39	0.73
YDR370C	87.88	82.61	58.06	82.82	62.79	94.88	65.49	70.27	57.76	68.28	54.72	42.97	79.48	55.66	62.77	59.57	52.75	63.06	65.14	75.59	32.02	57.68	52.61	39.02		YDR370C	3.06	3.54	2.66	2.71	5.6	2.85	3.37	0	0	2.93	4.41	2.24	1.04	2.68	0	1.3	0	0	0.96	2.38	6.7	3.24	2.84
YDR371C-A	0	0	0	0	0	0	0	0	0	0	0	0	0	0	0	0	0	0	0	0	0	0	0	0		YDR371C-A	0	0	0	0	0	0	0	0	0	0	0	0	0	0	0	0	0	0	0	0	0	0	0
YDR371W	34.67	14.55	27.05	35.11	25.67	29	39.92	32.97	21.98	32.39	33.62	24.46	29.57	44.21	35.29	30.42	33.84	31.68	42.91	31.84	28.29	30.53	33	21.38		YDR371W	1.61	0.88	0.89	3.57	2.99	0.51	0.95	0	0	4.34	4.61	3.48	0.88	2.27	0	3.54	0	0	0.41	2.62	0	0.91	2.04
YDR372C	243.36	210.94	227.56	333.67	319.3	259.42	243.88	265.67	261.47	257.2	248.05	219.38	185.4	252.37	180.55	195.46	227.65	183.13	213.94	210.5	188.16	262.11	191.3	207.78		YDR372C	20.07	6.44	10.05	21.11	35.75	17.8	12.87	0	26.63	18.76	37.05	27.45	5.6	24.4	2.08	17.88	12.17	0	4.54	22.44	18.06	13.45	29.5
YDR373W	218.1	260	168.66	288.23	251.61	296.87	253.55	340.45	190.7	187.67	268.76	227.19	252.77	295.04	234.65	249.72	205.9	203.41	296.94	274.05	180.27	216.63	198.26	167.02		YDR373W	17.31	13.2	12.93	20.94	28.52	17.2	16.14	18.08	29.87	39.88	31.36	16.37	1.57	22.3	0	19.18	13.65	0	4.37	30.21	20.26	15.9	22.5
YDR374C	7.72	0	2.33	5.62	9.46	5.7	7.28	9.48	6.29	21.37	11.32	7.21	30.95	10.89	21.02	20.46	28.92	24.39	27.6	22.2	15.18	28.69	15.6	11.31		YDR374C	0	0	0.08	0	0.46	0	0	0	0	0	0	0	0	0.53	0	0	0	0	0	0	0	0	0.69
YDR374W-A	437.1	778.52	394.73	622.1	733.29	583.85	881.94	986.53	629.5	1219.65	834.77	718.1	1275.29	954.31	1076.59	916.54	948.89	786.46	1100.09	1077.45	824.73	1025.89	574.39	850.97		YDR374W-A	11.92	6.49	23.61	32.91	41.41	25.37	13.15	0	0	11.44	4.05	12.86	0	5.23	0	29.25	0	0	7.52	18.57	0	0	13.66
YDR375C	27.23	4.98	5.02	12.99	10.68	9.52	18.11	11.68	9.77	12.95	10.92	8.88	7.68	9.72	10.77	14.16	11.47	14.74	26.92	13.45	11.22	11.44	20.02	10.1		YDR375C	4.05	1.4	1.71	6.1	3.98	1.96	3.52	0	0	1.41	4	2.73	0	3.23	0	3.06	0	0	0.93	4.82	0	1.3	4.22
YDR376W	29.42	6.06	9.83	17.41	8.28	11.56	23.01	17.07	10.28	20.76	13.16	9.27	13.4	14.37	16.16	17.77	18.65	18.13	30.2	17	15.38	14.24	23.41	11.77		YDR376W	3.36	1.65	2.67	7.7	5.46	3.76	5.45	0	0	1.94	5.94	3.84	0.92	5.32	0	6.86	0	0	0	5.87	0	2.5	5.4
YDR377W	646.33	672.5	628.83	610.92	748.26	881.18	905.12	1033.88	729.19	721.09	611	636.68	771.07	818.41	1266.81	842.17	939.27	1068.05	1039.64	1046.33	1178.24	1002.02	839.19	1156.11		YDR377W	443.82	197.7	211.65	401.03	236.73	236.19	314.65	126.37	0	255.53	337.08	261.28	82.34	290.49	8.17	319.94	143.15	167.3	61.08	379.62	283.24	116.86	319.17
YDR378C	1200.6	1174.74	1211.47	1248.25	1433.98	1558.13	1218.17	1649.76	1278.74	1403.18	1780.45	1776.44	1357.7	1843.4	1908.54	1251.59	1246.62	1494.74	1417.2	1721.8	1298.92	1434.14	1298.67	1738.89		YDR378C	100.3	76.45	33.8	121.32	82.59	49.82	88.55	0	0	102.66	158.96	65.98	27.29	88.06	13.54	83.32	79.08	0	0	116.66	117.35	25.98	84.32
YDR379C-A	382.33	203.83	370.23	408.52	493.14	492.56	894.27	872.46	561.78	667.81	485.36	431	630.52	903.61	1067.86	504.73	583.68	689.42	804.34	655.57	608.97	817.25	550.9	624.73		YDR379C-A	0	9.85	1.24	35.69	0	0	26.63	0	0	34.73	12.29	11.16	0	0	0	30.75	0	0	0	5.64	0	0	0
YDR379W	22.91	7.56	14.85	18.07	25.2	19.87	27.85	22.63	23.21	22.95	20.59	16.54	15.18	25.28	16.4	17.91	18.29	17.6	36.23	21.26	15.49	20.23	30.28	13.7		YDR379W	1.83	2.16	1.75	2.65	3.77	2.19	1.8	0	0	1.76	2.9	2.02	0.41	2.81	0	3.45	0	3.16	0.38	2.38	0	1.45	2.54
YDR380W	16.9	4.55	0.49	15.32	29.09	24.32	39.28	34.13	44.01	54.9	11.48	16.23	43.75	18.4	26.64	24.34	31.06	28.28	59.05	27.22	16.36	59.53	78.72	14.33		YDR380W	17.94	1.51	0.48	29.69	5.66	1.75	5.58	0	0	4.85	1.54	2.03	2.06	2.22	0.51	3.91	14.94	15.71	0	7.08	0	0.8	28.67
YDR381C-A	303.64	306.37	282.27	339.27	319.67	272.6	516.55	553.28	315.31	542.11	408.61	318.99	553.32	454.95	504.35	537.24	706.25	472.15	540.8	478.82	593.19	538.25	338.58	528.5		YDR381C-A	2.96	6.44	6.06	7	2.28	7.87	19.58	0	0	11.35	14.06	2.74	4.02	7.79	0	15.63	34.97	0	0	20.27	0	9.4	1.69
YDR381W	389.44	395.42	279.19	429.18	393.62	326.33	311.67	330.06	325.99	381.6	314.23	269.81	295.98	266.62	290.26	243.34	278.92	261.91	322.26	314.61	227.44	339.98	287.55	300.69		YDR381W	94.94	42.91	34.75	114.46	113.4	57.2	86.98	56.11	0	49.85	90.65	70.43	24.37	72.35	0	58.85	105.93	37.14	15.82	126.13	157.19	46.82	97.04
YDR382W	1174.71	537	357.76	810.51	758.9	558.96	953.6	890.95	611.3	934.28	1159.85	883.67	756.8	1005.55	826.51	950.18	785.73	849.13	974.71	1025.75	445.87	741.02	1516.96	609.35		YDR382W	1610.89	384.14	422.08	1496.91	1044.64	680.69	1704.21	756.82	250.1	1990.93	2019.77	1208.08	504.07	1502.08	163.12	1076.65	1143.09	2337.78	247.95	1519.67	2261.68	339.1	1154.24
YDR383C	145.73	123.83	125.02	212.8	128.19	119.08	287.67	209.86	144.78	279.64	181.43	153.99	175.87	223.49	208.01	141.21	218.38	151.68	143.88	176.56	153.44	188.16	132.27	175.76		YDR383C	1.67	4.08	1.37	4.6	2.57	1.77	4.29	0	0	0	4.53	3.6	1.13	4.39	0	3.15	0	17.28	1.05	1.04	0	1.77	2.87
YDR384C	20.14	27.83	14.71	13.23	13.27	11.21	7.07	13.5	14.09	7.12	19.92	20.09	3.42	15.52	9.56	11.89	8.3	9.77	16.72	10.86	8.71	10.65	23.88	4.54		YDR384C	14.41	25.78	7.41	9.2	32.32	21.19	10.6	10.75	0	9.22	34.5	18.63	1.87	31.94	0	6.22	16.23	0	0.87	16.25	0	4.61	12.59
YDR385W	123.09	40.53	43.77	59.28	51.27	49.3	59.11	55.61	39.52	56.52	69.13	45.9	46.73	60.56	43.21	67	54.35	54.39	80.27	50.09	23.77	33.29	115.37	32.67		YDR385W	397.92	191.45	130.17	379.55	293.4	203.86	439.77	187.79	0	322.62	466.07	357.9	144.26	407.99	66.04	264.28	468.15	435.61	76.84	409.43	459.58	123.38	412.28
YDR386W	39.79	12.58	18.8	24.84	17.19	20.73	26.88	24.97	20.47	35.14	23.07	14.28	28.82	25.2	27.49	27.47	27.9	28.43	31.9	29.99	21.93	26.52	20.24	21.13		YDR386W	1.52	0.14	0.31	1.8	2.16	0.68	0.75	0	0	0	2.24	1.17	0.69	1.56	0	0.58	0	0	0	1.74	0	0.36	0.58
YDR387C	19.49	1.32	6.87	12.02	6.72	10.4	17.89	15.66	10	16.6	15.76	11.47	10.53	15.69	14.22	16.39	13.03	13.68	26	11.63	5.22	9.12	20.02	5.56		YDR387C	2.35	0.8	0.32	1.62	3.18	1.56	2.81	4.6	0	0.56	4.19	1.9	1.2	2.06	0	3.77	0	0	0	2.56	0	1.04	2.7
YDR388W	37.09	17.11	27.59	40.93	30.66	17.27	55.32	37.68	33.02	52.17	45.76	33.29	22	45.98	30.42	48.74	56.38	34.28	51.65	38.27	23.24	38.99	75.34	37.23		YDR388W	44.55	10.34	14.15	51.76	29.06	27.2	48.53	10.82	0	27.84	61.93	29.77	13.63	52.76	4.2	44.99	28.59	21.48	5.66	50.36	0	16.83	48.5
YDR389W	28.12	9.91	8.1	22.88	19.12	15.72	26.1	27.13	16.52	22.41	24.37	19.22	17.52	20.11	18.55	20.45	14.54	16.65	24.34	19.94	10.86	19.66	40.57	8.55		YDR389W	3.42	2.53	2.17	7.33	7.74	2.99	4.5	0	0	2.35	13.45	7.54	1.66	7.73	0.99	4.8	2.89	5.07	0.93	6.09	0	3.54	8.55
YDR390C	26.34	32.94	19.65	23.36	29.26	26.94	18.78	27.99	27.52	30.09	23.71	18.23	27.61	29.46	26.68	32.71	27.19	29.88	43.32	27.17	24.65	31.31	29.97	16.93		YDR390C	6.3	6.45	4.72	10.15	9.34	5.77	9.46	7.9	0	6.78	7.36	6.53	2.4	6.86	0	2.19	5.96	0	1.27	10.21	0	5.34	9.25
YDR391C	95.76	31.12	53.83	80.39	52.36	58.45	88.96	65.72	50.57	56.75	71.92	63.42	37.81	92.72	44.18	40.86	48.73	46.18	55.34	38.9	21.93	30.46	55.06	39.19		YDR391C	4.32	9.87	9.91	13.62	15.33	5.51	8.26	0	0	4.97	25.8	18.11	4.7	24.26	0	23.15	10.21	0	0	8.61	0	9.45	8.41
YDR392W	69.94	31.02	45.41	61.03	47.95	43.61	67.97	55.1	41.9	64.44	52.14	34.95	43.76	54.56	43.88	55.73	57.65	67.46	72.43	53.21	39.01	59.8	68.33	38.57		YDR392W	4.77	5.48	3.84	5.43	4.09	1.97	5.85	0	0	2.03	3.96	3.59	2.16	1.86	0	5.8	0	0	2	3.96	0	4.68	6.07
YDR393W	69.82	6.64	25.12	50.23	26.55	40.1	64	43.92	34.12	66.68	35.1	26.63	42.9	42.56	38.72	35.8	37.86	48.75	47.54	34.98	23.85	50.94	45.38	33.09		YDR393W	0.74	0.8	0.91	3.49	0.28	0.59	2.98	0	0	1.41	2.5	1.7	0.5	2.91	0.75	1.95	0	0	0.46	3.44	0	0.78	2.96
YDR394W	118.28	66.14	37.11	93.85	104.98	69.25	75.82	88.59	71.71	56.96	81.62	69.21	41.87	77.25	43.09	59.35	67.18	48.4	77.32	58.94	34.26	80.07	96.62	40.53		YDR394W	19.44	29.6	21.74	30.99	47.79	32.31	26.86	18.64	51.34	12.95	56.87	31.94	7.02	42.5	1.61	25.02	4.69	8.23	8.51	28.43	27.86	21.72	33.66
YDR395W	45.84	25.08	21.38	30.11	38.43	26.58	28.84	32.31	31.73	28.89	31.73	26.69	31.46	28.7	21.89	35.29	34	28.92	35.76	33.7	19.34	40.21	39.29	21.37		YDR395W	12.77	13.11	10.36	18.22	24.15	11.85	19.16	10.26	0	11	27.81	21.31	3.57	17.11	1.33	9.21	11.62	10.19	3.51	19.9	2.87	13.77	23.56
YDR396W	225.36	105.47	103.04	176.39	128.52	130.22	132.52	111.53	131.82	109.55	127.38	84.24	92.72	135.52	122.44	95.87	127.99	138.85	148.94	143.16	81.73	140.77	92.98	73.07		YDR396W	11.87	8.41	4.82	14.81	18.76	9.13	16.83	0	0	0	22.33	2.35	9.72	22.59	2.9	10.74	16.86	0	0	31.18	100.35	16.16	23.12
YDR397C	54.78	21.07	0	51.68	21.5	32.29	37.65	26.02	19.48	34.02	25.64	12.6	19.24	22.45	23.56	26.59	21.86	25.78	39.78	24.42	4.46	25.71	19.71	11.72		YDR397C	3.02	3.1	3.24	4.03	0	0	0	0	0	20.54	0	5.87	0	0	0	1.41	0.06	0	2.25	0	0	0	2.85
YDR398W	114.6	83.04	69.4	78.72	151.19	95.85	55.07	84.06	139.43	67.93	77.02	64.18	80.83	50.53	54.28	51.79	83.1	50.99	37.79	69.91	43.96	104.4	130.89	53.48		YDR398W	10.21	20.75	14.77	3.54	31.54	15.91	10.81	19.51	25.78	6.69	23.01	14.21	1.02	12.03	1.51	2.26	8.84	0	4.4	11.49	8.74	13.64	10.28
YDR399W	442.09	470.58	374.61	439.05	545.2	518.58	285.31	551.75	437.82	391.19	396.65	402.62	523.56	407.54	498.13	431.23	352.16	404.42	435.72	534.63	423.72	404.38	387.23	448.48		YDR399W	73.03	42.28	26.9	94.8	122.75	50.18	73.45	28.95	23.92	56.77	89.16	74.69	6.29	83.6	7.49	27.58	76.53	38.33	16.33	89.28	0	49.63	82.14
YDR400W	35.35	25.96	12.25	25.87	17.04	26.38	18.89	31.57	18.1	23.26	32.07	24.05	26.07	37.84	29.91	26.12	18.48	24.39	29.33	28.71	10.64	21.44	19.74	8.92		YDR400W	9.43	4.85	3.29	11.99	10.92	5.58	12.72	0	0	10.05	17.44	11.31	2.14	15.18	0	5.94	12.39	10.86	3.31	8.16	18.39	4.26	6.91
YDR401W	2.72	0	1.73	2.85	0	1.14	1.29	1.7	1.39	1.85	5.59	0	1	0.87	0	1.02	1.28	0	4.6	4.13	2.55	0	1.23	1.38		YDR401W	1.18	0	0	1.87	0	0	0	0	0	0	0	0.36	0	0	0	0	0	0	0	0	0	0	0
YDR402C	3.6	0	3.47	0.62	2.39	0.48	1.22	0.59	1.13	0.64	0.97	0.97	1.4	1.46	0.95	2.72	2.37	1.44	3.76	1.71	3.58	2.4	2.11	0.89		YDR402C	0	0	0.05	0	0	0	0	0	0	0	0	0	0	0	0	0	0	0	0	0	0	0	0.19
YDR403W	8.25	6.89	2.98	5.75	6.72	4.26	7.3	7.18	5.51	10.05	5.59	3.86	14	7.1	9.15	10.46	10.48	8.47	12.93	9.12	6.99	15.96	9.31	4.05		YDR403W	0.61	0	0.08	0.24	0	0	0	0	0	0	0.21	0.19	0	0	0	0.08	0	0	0	0.38	0	0.11	0.88
YDR404C	102.29	24.54	45.1	70.44	44.29	51.43	47.2	49.24	41.59	45.54	43.83	34.38	48.8	53.88	47.41	58.12	38.43	47.68	65.18	55.55	32.85	28.83	74.02	28.33		YDR404C	29.96	12.6	20.84	30.08	43.11	26.09	30.06	0	0	18.3	39.78	20.16	11.12	38.26	2.76	22.11	32.21	56.47	8.59	35.64	23.9	24.05	29.67
YDR405W	32.04	39.36	32.62	32.18	47.99	29.97	58.3	56.8	48.47	44.49	48.69	38.43	34.78	48.46	43.84	30.76	42.55	29.13	72.17	49.64	19.41	24.65	104.47	19.97		YDR405W	13.1	10.7	9.45	8.04	11.8	6.59	10.18	0	0	11.18	10.88	6.29	1.98	8.31	0	8.52	0	15.09	1.84	9.53	0	5.66	8.35
YDR406W-A	4.84	0	16.08	11.65	36.28	8.43	7.73	5.24	8.27	0	20.84	0	8.22	5.18	17.24	34.89	0	15.88	28.22	25.13	10.48	11.65	23.93	7.81		YDR406W-A	0	0	0	0	0	0	0	0	0	0	0	0	0	0	0	0	0	0	0	0	0	0	0
YDR406W	15.52	6.2	5.36	8.6	6.39	5.05	13.45	9.1	5.07	9.3	4.9	3.84	5.77	9.32	6.02	9.1	7.23	7.07	15.17	5.99	6.24	6.8	9.26	3.25		YDR406W	0.88	2.25	0.62	1.55	4.25	2.89	1.23	3.08	0	1.32	1.47	1.9	1.07	3.19	0	6.72	2.33	2.04	0.74	1.1	0	2.01	1.07
YDR407C	12.49	6.89	5.04	11.83	8.89	8.28	20.82	16.11	10.01	20	14.54	12.35	15.33	18.68	17.64	18.93	15.76	17.38	24.83	18.69	13.29	22.24	21.14	12.9		YDR407C	2.59	1.09	0.59	3.62	2.72	1.25	2.94	5.53	0	1.13	3.83	2.61	0.48	2.99	0	2.09	1.39	0	0.45	3.96	0	0.54	2.7
YDR408C	95.42	34.88	58.46	86.48	122.51	72.44	87.49	81.04	97.4	90.96	91.62	72.76	78.04	96.65	73.12	103.88	98.53	72.63	162.56	117.84	102.01	116.1	164.85	111.68		YDR408C	37.75	9.49	11.9	54.21	36.62	16.48	40.59	0	0	9.29	36.16	24.77	3.95	30.6	7.84	14.25	11.45	20.07	8.55	25.94	101.93	12.65	34.4
YDR409W	10.87	6.96	5.35	6.45	6.49	7.82	8.36	9.58	7.9	6.73	7.25	5.32	7.69	8.08	8.48	12.25	9.68	9.04	15.76	9.09	5.88	12.11	12.19	6.17		YDR409W	1.89	1.03	0.61	2.84	1.46	0.82	2.9	0	0	0.99	2.91	1.32	0.23	1.05	0	1.75	0	0	0.43	1.6	0	1.39	2.16
YDR410C	52.51	67.19	30.67	53.38	47.34	57.79	31.82	60.97	45.63	42.99	43.92	36.61	48.66	45.27	42.4	39.56	45.93	49.1	56.3	37.83	27.35	40.92	35.43	25.08		YDR410C	11.6	7.67	4.75	2.61	5.12	6.17	8.53	0	0	3.18	13.51	4.85	0	7.28	0	5.01	0	0	2.09	7.23	0	4.1	5.7
YDR411C	14.4	11.76	1.02	13.01	5.05	4.08	13.69	14.9	9.93	17.46	18.12	11.68	10.39	12.13	15.08	13.9	10.52	10.85	32.57	10.17	11.27	6.63	24.59	6.91		YDR411C	16.7	3.13	3.85	20.18	10.88	7.22	21.89	8.18	0	9.02	24.47	19.32	1.42	21.08	4.23	17.15	12.35	21.65	1.32	16.26	9.16	4.98	19.75
YDR412W	240.14	78.8	85.61	101.45	143.24	110.57	55.18	69.28	142.8	57.5	48.72	48.49	30.06	31.98	38	31.12	36.9	30.61	40.77	34.93	26.74	36.11	104.23	23.04		YDR412W	6.64	33.25	34.6	7.51	40.54	32.28	8.19	0	0	11.39	27.65	23.02	3.77	11.84	1.72	9.29	0	0	9.63	11.1	0	24.7	14.05
YDR413C	40.65	115.42	172.2	130.12	148.81	163.53	78.35	143.97	205.06	88.74	129.31	109.97	79.1	133.73	62.7	90.07	99.05	94.82	57.99	99.23	30.78	101.52	99.11	84.77		YDR413C	4.78	0	5.06	4.31	32.78	2.73	2.42	17.93	0	0	8.55	0	1.14	5.13	0	0	0	0	0	0	20.1	5.88	2.03
YDR414C	39.56	21.85	14.18	28.28	38.8	34.16	41.8	42.77	33.76	44.18	30.3	24.77	40.56	34.42	32.42	38.12	32.75	32.47	47.05	38.09	21.56	54.07	36.56	28.9		YDR414C	3.4	1.06	0.6	5.36	3.37	2.07	3.93	7.6	0	1.86	6.92	2.24	0.66	3.83	0	3.11	0	0	0.61	4.53	0	1.37	4.45
YDR415C	72.77	23.1	34.51	49.11	43.03	48.69	49.13	37.26	34.08	39.51	40.89	30.23	31.56	46.84	42.36	39	39	47.72	49.21	39.45	24.86	40.79	37.17	29.54		YDR415C	4.2	7.36	5.92	5.52	9.36	3.72	6.86	0	0	8.95	12.03	6.18	0	4.91	0	6.69	0	0	3.53	7.84	0	5.93	9.35
YDR416W	39.79	11.44	20.13	25.41	24.38	33	31.25	29.67	26.6	33.87	24.14	20.6	29.6	28.35	29.35	37.46	32.53	32.37	35.8	36.98	23.02	34.28	29.83	19.38		YDR416W	1.45	2.47	1.83	2.57	4.06	3.28	2.67	2.84	0	1.04	4.43	1.79	0.49	2.71	1.1	1.71	2.14	11.28	0.69	3.62	0	1.86	2.29
YDR417C	128.19	65.75	20.25	107.04	66.77	91.4	83.2	86.9	62.07	70.23	128.56	101.17	47.16	126.5	94.96	57.28	72.72	108.48	122.18	89.02	48.35	54.38	152.12	70.46		YDR417C	501.26	253.47	237.19	479.12	377.72	339.9	364.54	156.87	0	323.37	545.57	474.75	124.32	399.06	109.58	269.39	368.21	472.52	58.01	376.18	488.29	134.74	349.26
YDR418W	232.3	113.82	97.15	148.08	96.17	137.08	145.12	145.64	106.24	125.51	188.1	149.24	84.81	185.98	140.62	191.29	98.97	184.74	212.32	156.74	58.21	104.08	200.65	71.25		YDR418W	719.66	342.59	258.58	788.96	580.14	367.41	750.97	458.58	176.78	797.51	964.38	568.54	236.54	595.44	50.41	551.24	578.89	626.95	172.81	736.66	277.32	238.57	685.9
YDR419W	30.85	10.3	13.36	17.08	10.71	13.56	18.79	15.46	18.18	16.4	14.74	9.18	10.87	14.51	11.76	13.52	14.33	13	19.1	15.46	10.64	15.05	19.88	6.48		YDR419W	1.02	1.38	1.7	2	3.33	0.54	1.49	7.95	0	1.46	2.41	1.64	0.69	1.11	0	1.92	0	0	0.64	1.9	0	1.52	3.06
YDR420W	17.21	6.72	7.26	14.49	17.55	10.01	12.03	13.3	13.52	12.52	14.06	10.84	8.5	11.92	9.69	12.04	9.1	9.66	20.75	11.5	12.31	12.51	18.08	7.21		YDR420W	1.82	1.4	1.01	2.68	4.54	1.94	1.65	1.3	12.86	1.11	5.01	2.07	0.11	2.62	0.17	1.22	1.96	0	0.84	1.96	0	2.02	2.04
YDR421W	11.07	2.93	2.54	8.8	5.86	5.42	16.76	9.39	8.8	16.13	7.7	4.85	14.41	10.83	11.95	17.18	16.88	14.02	21.62	14.95	10.53	15.61	20.87	10		YDR421W	1.46	0.27	0.02	1.92	0.75	0.09	1.08	2.55	0	0.94	0.99	0.3	0	0.71	0	2.21	0	0	0.21	1.01	0	0.17	1.86
YDR422C	15.54	4.32	4.86	10.83	11.47	8.62	13.67	10.47	11.92	12.39	15.02	9.91	6.5	8.8	9.02	10.95	10.45	8.72	20.42	11.69	9.02	10.02	18.64	5.81		YDR422C	3.84	1.67	1.44	3.43	5.48	1.63	4.24	0	0	0.37	3.91	2.9	0.26	3.54	0	2.25	4.54	3.98	0.73	3.95	0	1.63	4.29
YDR423C	27.03	15.09	10.61	19.89	18.77	12.25	26.47	30.01	14.88	31.62	23.25	16.58	17.09	21.83	19.39	27.42	27.01	23.04	39.72	30.59	15.42	24.82	39.45	15.05		YDR423C	3.35	4.56	3.09	4.62	6.79	1.34	3.7	0	0	3.21	8.25	3.74	2.28	4.78	0	4.11	14.86	0	0.53	5.74	0	2.37	5.76
YDR424C	844.74	843.81	865.38	1129.95	1194.77	862.96	1295.83	1323.84	865.41	1484.08	1462.19	1056.4	1427.61	1243.53	1132.64	1241.45	1456.22	1054.29	1257.8	1426.98	1284.26	1442.37	1175.18	1558.8		YDR424C	37.46	34.96	27.05	46.44	33.05	17.09	55.12	0	0	30.81	43.62	16.5	0	9.4	0	20.21	0	0	6.75	63.36	0	13.23	42.95
YDR425W	16.35	5.03	3.24	8.82	5.15	5.88	12.76	7.91	5.13	12.49	7.15	7.05	6.36	8.3	8.93	10.12	8.97	9.52	16.44	9.22	8.6	11.68	13.59	4.86		YDR425W	2.09	1.91	3.17	4.34	2.5	1.51	2.24	4.03	0	0.49	4.94	2.4	1.75	2.03	0.52	3.08	0	0	0.32	3.62	0	2.43	2.42
YDR426C	24.96	39.76	40.04	42.01	23.72	45.73	23.8	37.43	15.86	27.44	34.94	30.75	29.19	55.43	41.32	56.94	27.67	37.87	57.09	45.65	17.36	36.76	47.35	13.75		YDR426C	2.14	4.42	2.26	1.17	4.48	1.28	2.16	0	0	0	4.46	1.3	0	2.12	0	3	0	0	0	2.14	0	1.1	3.59
YDR427W	171.89	174.1	112.08	201.35	168.3	174.2	136.37	164.07	121.37	128.37	145.21	126.76	117.59	153.35	107.93	112.27	121.71	102.57	127.05	119.78	72.49	127.66	102.17	99.68		YDR427W	20.64	26.06	25.44	25.98	43.4	27.11	28.11	13.76	0	17.7	50.11	40.63	6.57	37.4	0.89	25.7	31.16	9.11	7.76	28.19	0	25.9	37.51
YDR428C	82.43	36.44	54.45	54.64	32.32	53.29	33.07	39.65	29.82	28.83	25.99	22.79	20.5	35.1	37.12	40.09	36.32	55.75	48.71	33.13	23.34	32.17	38.38	28.52		YDR428C	3.68	11.21	9.75	6.96	9.65	5.48	7.03	0	0	2.82	8.49	5.44	3	4.52	0	4.44	0	0	3.71	10.54	25.81	7.27	13.07
YDR429C	576.65	447.37	498.46	526.97	511.59	427.92	289.72	340.75	460.23	291.44	376.84	334.39	275.26	283.24	214.85	230.2	298.16	222.63	224.26	274.15	190.01	292.91	338.86	274.57		YDR429C	50.34	101.38	67.83	46.24	136.3	64.6	47.19	64.8	53.53	26.47	117.1	78.69	12.2	75.08	1.4	35.94	32.63	28.6	13.92	55.86	36.31	57.97	64.83
YDR430C	11.06	2.81	5.77	8.28	6.3	7.26	8.1	10.57	7.88	8.35	6.88	4.2	6.2	6.85	6.62	11.45	8.47	9.77	19.04	11.38	6.53	6.82	11.07	6.04		YDR430C	3.43	2.97	2.41	5.78	6.62	4.31	5.96	0	0	2.39	5.61	4.85	2.33	4.65	0.63	6.59	3.69	9.69	0.79	5.92	2.73	3.36	6.25
YDR431W	11.21	0	0	7.19	13.43	2.6	5.37	2.42	0	6.61	14.46	2.19	0	2.4	5.32	6.46	0	4.41	26.12	0	4.85	0	11.08	3.61		YDR431W	3.82	2.08	0	0	0	0	0	0	0	0	0	0	0	0	0	0	0	0	0	0	0	1.35	0
YDR432W	97.57	74.75	54.98	82.83	120.82	67.75	70.61	92.99	89.42	67.27	121.28	107.99	37.38	72.99	54.68	38.44	44.01	32.67	73.75	70.88	23.69	40.17	149.23	45.67		YDR432W	64.67	161.68	127.6	68.58	174.79	129.48	82.63	49.56	138.38	54.13	197.74	125.78	21.71	173.86	17	72.27	82.98	43.81	40.09	83.58	72.43	92.97	82.53
YDR433W	51.43	54.6	23.04	27.86	32.83	18.5	29.84	31.43	18.09	19.83	34.1	0	0	36.29	22.6	26.08	20.14	31.06	44.08	7.48	15.39	7.63	45.37	0		YDR433W	46.93	4.37	14.84	53.96	131.43	110.62	60.21	65.16	1.96	33.06	102.56	147.84	10.52	91.23	13.21	38.6	0	143.51	0	0	0	22.85	11.42
YDR434W	63.96	35.96	42.47	53.57	56.13	47.84	63.71	60.37	52.57	76.12	72.85	57.09	59.6	70.38	63.17	62.66	78.29	62.26	78.46	81.68	52.24	82.75	71.21	57.49		YDR434W	9.21	2.17	3.31	11.14	9.01	4.41	10.62	4.81	0	4.12	8.76	6.53	1.67	10.24	0.62	6.61	3.63	19.1	1.94	11.29	0	3.58	12.67
YDR435C	20.25	7.4	9.61	14.68	5.78	9.32	14.63	10.77	7.41	10.74	10.37	8.17	5.45	12.04	8.96	19.91	16.01	10.12	18.49	9.34	9.74	8.5	17.07	7.77		YDR435C	3.29	1.19	2.17	5.62	1.69	4.37	4.43	0	0	3.15	7.07	3.21	3.73	6.73	0	5.38	0	0	0.69	4.1	0	1.93	6.91
YDR436W	14.67	9.05	6.09	11.44	6.87	5.01	16.94	8.78	7.26	10.17	10.99	6.79	8.44	12.34	8.94	12.73	12.15	6.87	23.94	10.87	10.49	9.13	14.88	6.54		YDR436W	1.34	0.24	0.98	2.64	1.55	1.43	0.99	0	0	0.43	3.18	1.44	0.91	2.55	0	1.85	0	0	0	1.53	0	0.87	2.43
YDR437W	13.57	8.68	7.51	6.34	8.47	3.93	9.93	7.33	8.68	14.44	8.51	6.64	9.59	2.42	9.39	8.96	7.77	6.67	19.77	9.39	17.13	16.32	4.19	0		YDR437W	3.85	4.2	6.32	6.08	7.44	6.15	5.67	30.18	0	18.49	11.78	2.38	0	5.08	0	4.37	0	0	2.43	9.61	0	4.77	5.52
YDR438W	26.33	2.13	9.2	8.66	18.27	9.96	15.26	14.98	14.19	22.06	12.52	10.3	9.4	8.01	6.91	16.56	16.66	12.18	24.42	16.1	12.59	12.66	23.96	7.15		YDR438W	0.47	0.26	0.06	0	0.36	0	0.35	0	0	0	0	0.15	0	0	0	0.18	0	0	0	0.29	0	0.17	0.27
YDR439W	17.69	2.3	5.97	12.97	10.33	10.95	14.12	11.34	14.07	13.84	12.57	9.09	13.22	10.27	12.09	10.58	6.69	11.2	21.18	9.33	9.08	8.65	24.44	5.31		YDR439W	1.02	3.62	2.72	3.63	3.16	1.9	1.88	0	0	0.98	2.78	1.58	1.39	1.79	0	1.35	0	0	0.64	3.82	0	1.98	2.05
YDR440W	28.11	7.53	10.85	25.41	20.07	13.83	27	23.67	22.45	29.39	29	24.77	26.61	25.71	23.07	22.36	27.79	18.43	29.04	25.94	18.04	25.55	34.31	18.17		YDR440W	1.39	0.3	0.53	1.32	1.51	2.08	2.46	0	0	0.53	3.03	1.8	0	1.71	0	1.37	3.29	5.77	0	2.95	4.89	0.39	2.39
YDR441C	34.31	22.42	4.85	21.06	20.78	20.32	9.32	31.56	21.18	18.65	24.34	15.71	19.81	17.97	12.99	15.77	12.54	11.01	23.92	18.18	9.48	8.78	32.46	9.41		YDR441C	4.98	14.22	15.13	12.76	29.78	19.2	17.39	19.48	32.19	4.78	21.97	6.14	1.69	8.74	2.52	4.7	14.71	0	1.57	5.43	0	9.23	7.84
YDR442W	0	8.18	4.46	2.59	3.92	0	1.7	10.77	4.03	0.88	0.67	2.17	4.37	1.78	5.04	3.44	6.51	1.85	9.16	0.06	0	0	5.71	0		YDR442W	0.87	0.98	0.05	0.07	4.63	1.66	7.44	0	0	0	0	2.83	0	0.51	0	0	0	0	0	5.95	0	0.46	0
YDR443C	6.17	2	3.31	3.57	3.83	2.1	5.89	3.53	4.65	6.14	4.46	3.19	2.96	3.58	2.68	6.66	4.51	3.51	12.18	5.75	5.53	5.1	7.35	2.01		YDR443C	1.47	0.42	0.3	2.02	1.18	0.77	0.9	0	2.75	1.22	1.73	1.27	0.29	1.57	0	1.37	1.26	0	0	1.84	0	0.36	2.21
YDR444W	20.59	5.81	6.14	7.89	10.18	8.03	12.64	8.96	11.49	16.71	9.66	8.26	13.11	9.5	9.92	12.95	9.2	8.32	23.83	14.29	16.08	14.08	22.16	5.48		YDR444W	0.69	0.76	1.45	1.64	1.07	1.36	2.21	0	0	0.44	3.46	1.86	0	1.42	0	1.22	2.74	0	0.29	2.31	4.06	0.9	1.86
YDR445C	35.63	41.16	45.8	45.14	59.81	54.1	62.27	66.83	84.66	86.7	85.86	73.29	94.81	73.53	63.16	107.86	84.4	76.78	106.01	98.8	66.35	116.32	85.15	46.8		YDR445C	1439.75	410.48	402.4	716.96	631.49	652.98	816.07	517.59	53.45	1133.77	662.22	744.62	2832.77	373.61	2601.99	619.31	635.17	642.37	2194.3	593.35	906.3	367.71	800.43
YDR446W	3.92	0	0	1.72	4.28	0.83	2.56	1.93	7.91	6.66	1.92	0.35	7.87	1.53	2.12	4.88	6.13	4.91	17.93	5.92	8.49	7.72	4.41	3.45		YDR446W	0	0	0	0.44	0	0	0	0	0	0	0.41	0	0	0	0	0	0	0	0	0	0	0.21	0.7
YDR447C	558.17	768.92	570.82	691.25	494.82	752.52	600.41	761.12	484.45	506.26	819.15	751.2	709.75	817.79	845.07	688.91	589.62	756.71	760.39	842.9	544	647.94	559.75	574.73		YDR447C	481.31	276.03	207.81	544.05	434.92	210.16	516.77	269.75	92.21	361.42	669.82	464.52	178.84	469.95	79.63	381.24	231.13	178.47	85.4	536.9	318.4	188.3	493.28
YDR448W	25.42	8.79	15.97	30.29	26.42	24.7	36.38	33.67	24.82	43.43	36.45	23.97	35.74	38.98	35.73	29.36	30.29	37.1	44.54	38.49	24.78	36.9	31.12	10.7		YDR448W	6.25	4.68	3.31	7.7	5.42	1.25	4.59	0	0	3.75	9.28	3.61	1.06	5.83	0	2.36	0	8.09	0	9	0	1.52	6.27
YDR449C	85.19	22.49	33.67	53.64	74.27	75	40.29	68.7	66.34	44.28	55.01	52.01	61.17	44.62	55.08	50.15	43.35	54.09	46.78	61.03	28.28	75.88	65.69	31.96		YDR449C	4.99	13.59	15.95	4.54	20.16	15.13	8.48	6.02	9.94	8.11	15.39	12.32	1.57	10.12	0.78	3.34	0	0	2.42	10.29	0	8.82	7.27
YDR450W	1224.65	1589.84	1406.51	1522.03	1564.71	1830.95	1695.21	1752.01	1573.2	1422.17	1898.37	2107.45	1533.34	2109.41	2305.15	1379.38	1587.26	1943.71	1582.8	1858.09	1852.14	1803.89	1446.05	2021.33		YDR450W	810.1	402.4	260.37	825.24	582.17	301.48	833.15	675.65	230.8	672.39	834.34	602.08	275.85	657.64	76.81	584.03	669.33	613.15	147.65	884.58	801.98	257.69	905.33
YDR451C	9.98	4.51	7.8	5.88	7.03	3.57	27.88	19.35	16.03	55.95	20.83	20.09	49.79	28.9	48.23	35.3	33.27	47.16	54.94	30.45	29.85	45.18	32.63	13.72		YDR451C	17.01	0.27	0	12.63	0.39	0	17.67	0	0	12.48	10.19	3.86	6.81	6.59	0	3.02	0	0	0	18.39	0	0.35	12.33
YDR452W	63.54	28.76	54.35	58.59	42.81	44.24	81.72	63.58	50.82	69.92	72.95	56.65	41.65	72.31	80.49	43.36	55.52	50.49	97.49	61.02	65.74	50.04	63.4	31.53		YDR452W	6.15	2.19	3.26	10.44	5.66	2.89	9.57	0	0	6.81	14.61	8.31	3.22	11.62	0	12.32	2.8	4.9	0.89	13.26	0	4.43	10.16
YDR453C	7.11	0	4.29	6.73	6.78	4.5	15.99	14.67	9.37	23.49	13.2	5.69	3.29	15.91	18.4	10.7	5.55	9.32	22.12	9.39	8.39	1.55	7.98	3.12		YDR453C	29.74	1.2	1.21	7.82	3.4	1.17	19.45	0	0	21.14	6.73	14.94	40.46	34.81	0	57.8	26.05	0	0	19.9	0	2.72	15.15
YDR454C	221.4	79.92	103.69	145.72	98.76	83.69	121.87	118.53	94.74	121.38	124.63	92.3	131.86	129.24	101.28	121.44	122.77	144.26	144.55	121.68	73.59	121.84	153.43	101.79		YDR454C	102.9	86.29	57.04	153.02	123.27	53.5	140.97	129.66	30.61	90.8	142.2	77.32	30.57	114.24	11.98	75.93	55.95	73.56	17.91	151.08	124.55	53.89	146.45
YDR455C	3.66	0	0	1.85	0	1.41	3.87	4.98	0	0	4.51	3.97	2.76	5.24	4.32	4.06	6.77	3.04	3.49	6.7	7.81	0	0	0		YDR455C	5.2	7.86	6.01	0	0	10.51	3.53	0	0	0	0	3.11	0	4.03	0	3.43	0	0	8.78	6.32	0	1.77	5.03
YDR456W	18.8	4.57	5.43	12.04	6.91	7.58	11.15	12.7	9.01	11.55	12.67	10.8	8.65	10.17	8.46	13.45	10.55	11.02	27.07	12.07	9.15	13.24	18.37	4.08		YDR456W	10.06	3.77	2.97	12.6	10.37	4.31	12.64	7.94	0	7.78	14.64	11.29	3.79	13.32	0.51	11.36	6	10.51	1.99	9.54	0	4.54	12.17
YDR457W	13.47	5.06	6.92	7.73	6.2	6.59	8.99	6.5	7.33	8.42	8.34	5.31	6.35	9.48	6.85	13.08	11.32	10.42	16.32	10.37	7.25	9	12.08	4.84		YDR457W	4.81	2.64	2.27	5.17	5.41	2.82	5.09	2.11	2.33	2.41	8.91	6.22	1.28	7.22	0.09	4.43	2.66	1.86	1.19	7.31	0.79	2.75	8.55
YDR458C	43.37	30.37	29.08	38.27	32.17	33.09	48.71	41.84	40.14	48.72	34.34	29.7	39.78	39.47	33.44	45.78	41.98	44.93	52.99	44.41	28.74	50.62	55.66	33.7		YDR458C	2.41	1.44	2.83	4.94	4.83	2.95	3.54	3.77	0	2.77	6.54	3.71	1.31	4.23	0.49	3.18	5.7	0	1.21	3.3	0	2.21	6.35
YDR459C	19.7	4.2	7.27	8.55	9.83	14.43	12.66	18.04	11.44	14.51	13.53	12.57	7.89	13.47	15.74	13.4	14.1	17.76	22.71	15.04	13.02	14.47	15.2	5.73		YDR459C	0.47	0.76	1.02	1.84	3.6	0.74	3.09	0	0	0.89	2.22	1.58	0	1.23	0	1.41	0	9.67	0	2.32	0	0.66	2.14
YDR460W	66.72	20.28	52.63	42.88	40.07	39.44	59.84	41.41	51.57	58.73	31.96	23.9	43.14	41	31.54	44.24	55.59	49.59	49.79	42.15	35.73	46.07	63.63	33		YDR460W	2.81	3.98	3.92	4.44	7.82	3	4.97	0	0	4.32	4.21	6.42	0.77	5.93	0	4.68	0	0	0.71	5.26	0	4.37	4.19
YDR461C-A	319.36	155.67	185.13	507.79	258.16	199.84	598.8	356.16	203.27	532.91	256.2	208.2	240.77	358.06	255.6	215.36	191.53	192.79	284.25	220.88	120.65	182.85	162.78	228.75		YDR461C-A	43.19	32.92	31.86	40.89	20.01	9.2	31.78	0	0	33.16	29.34	15.98	11.75	22.76	0	35.88	102.17	0	0	37.68	0	27.46	14.86
YDR461W	0	0	0	0	0	0	0	0	0	0	0	0	0	0	0	0	0	0	0	0	0	0	0	0		YDR461W	0	0	0	0	0	0	0	0	0	0	0	0	0	0	0	0	0	0	0	0	0	0	0
YDR462W	48.6	7.94	30.9	39.77	29.43	24.58	61.89	49.18	32.64	59.94	45.59	33.37	42.09	29.88	38.64	35.74	40.84	35.93	57.23	43.98	24.61	27.35	91.95	29.99		YDR462W	14.1	8.63	9.63	23.63	13.6	3.75	23.33	0	0	23.67	14.36	12.5	4.79	13.92	0	20.63	0	73.06	0	16.47	30.93	6.85	17.17
YDR463W	53.61	42.87	33.99	50.12	71.93	44.78	62.99	57.34	75.75	64.55	53.64	46.78	60.94	54.78	48.47	56.96	72.57	48.33	67.91	59.48	52.36	84.6	95.4	58.49		YDR463W	15.23	16.06	14.13	16.26	20.08	12.32	16.57	0	8.21	6.09	21.11	9.78	2.16	12.81	0.64	11.38	26.26	6.58	2.8	16.21	11.13	9.41	18.18
YDR464C-A	0	0	0	0	0	0	0	0	0	33.43	0	14.17	0	10.8	4.9	0	0	0	20.39	41.98	40.75	0	24.67	21.03		YDR464C-A	0.83	0	1.56	0	0	0	0	0	0	0	0	0	0	0	0	0	0	0	0	0	0	0	0
YDR464W	21.27	21.3	18.83	13.98	26.69	15.91	17.52	18.86	28.82	23.48	19.23	16.04	20.08	15.86	16.55	20.38	18.64	14.55	27.75	21.12	17.97	22.83	24.95	11.04		YDR464W	1.47	3.6	2.61	2.98	5.11	1.23	2.01	0	0	1.21	3.71	2.01	0.71	1.94	0.21	1.11	1.24	4.36	0.66	2.03	0	2.67	3.19
YDR465C	200.95	106.59	108.37	142.69	190.82	143.33	54.05	122.17	160.44	56.72	120.75	115.05	69.83	106.88	51.58	80.16	71.95	63.25	43.81	81.37	35.31	84.93	111.91	54.96		YDR465C	7.06	16.27	17.3	5.57	51.28	23.86	10.69	19.5	0	5.58	41.16	24.71	2.82	24.42	5.88	5.8	9.82	8.61	5.24	9.83	21.86	19.21	11.9
YDR466W	15.13	4.79	5.44	11.42	9.38	8.17	14.86	13.78	8.65	13.81	11.64	8.62	6.27	12.49	9.76	9.87	8.14	7.95	21.27	12.6	5.78	13.31	22.02	6.27		YDR466W	1.73	1.06	0.87	2.63	3.23	1.97	2.07	0	0	1.66	4.93	1.03	1.44	4.33	0	2.45	4.08	3.58	0.87	3.8	0	1.3	2.81
YDR467C	74.81	28.14	58.15	75.39	68.83	67.79	93.89	66.95	42.19	57.19	72.92	60.15	79.11	82.37	76.09	109.5	61.99	94.04	118.08	80.54	20.03	120.94	105.51	49.92		YDR467C	3.37	5.1	0.92	7.26	4.66	2.77	6.68	0	0	0	2.29	2.73	3.99	1.34	0	5.61	0	0	0	3.61	0	4.37	5.01
YDR468C	139.97	138.91	107.78	208.12	198.49	148.41	324.95	268.65	199.33	371.77	246.08	187.88	335.82	288.2	302.13	271.32	362.87	258.93	256.95	355.02	302.86	358.34	259.63	280.47		YDR468C	9.07	1.98	3.84	10.02	7	4.83	8.01	14.2	0	1.74	6.16	4.75	2.47	5.57	0	5.82	0	0	0	11.87	0	4.16	11.96
YDR469W	183.25	271.92	217.29	198.69	343.69	254	312.81	381.19	347.52	398.68	348.58	330.55	613.87	442.52	514.32	383.12	535.58	423.6	396.99	509.64	471.5	557.33	333.79	536.08		YDR469W	7.87	7.14	6.09	4.14	4.05	0	7.72	0	0	10.07	9.8	3.24	3.57	6.91	2.66	6.44	15.52	0	1.66	10.63	0	4.17	9.03
YDR470C	9.48	4.45	1.93	9.61	3.48	5.16	9.88	8.78	4.12	11.78	9.98	4.35	5.25	10.55	7.92	10.03	6.64	7.1	20.42	7.62	5.86	5.12	19.11	5.3		YDR470C	4.61	1.97	1.53	8.58	2.04	1.4	4.61	0	0	3.13	4.48	1.93	2.24	3.18	0	3.36	7.8	13.66	0.42	4.31	0	1.05	5.1
YDR471W	1169.59	1251.29	1198.95	1508.34	1269.89	1507.8	1281.49	1441.61	1234.97	1073.63	1634.77	1567.74	1338.89	1640.08	1510.15	1172.09	1172.91	1480.38	1178.26	1461.28	1167.98	1338.35	1092.54	1342.17		YDR471W	498.2	426.25	267.72	499.48	494.96	303.19	529.31	414.78	263.47	379.15	832.59	499.63	97.4	529.91	22	435.61	337.18	548.84	98.17	538.65	250.17	236.43	533.22
YDR472W	29.87	11.91	16.74	20.83	12.2	15.74	16.72	18.87	11.92	16.39	17.1	11.38	15.14	16.61	17.95	22.07	16.66	25.44	31.64	19.72	6.72	10.26	27.79	10.63		YDR472W	7.93	12.24	13.01	9.91	12.76	8.44	10.7	0	0	3.81	18.41	9.79	0	7.55	2.68	7.49	23.46	0	1.67	11.95	0	12.84	11.75
YDR473C	139.32	67.45	91.68	122.71	114.99	79.31	166.63	105.37	129.39	169.15	97.4	68.12	138.03	103.21	100.26	110.11	160.95	98.35	93.69	113.5	104.56	142.86	109.54	111.25		YDR473C	2.14	0.97	1.61	1.97	2.75	1.33	0.79	0	0	0	2.91	2.64	0.97	2.5	0	0.94	0	0	0.45	1.11	0	1.51	2.25
YDR475C	21.25	12	6.92	15.53	14.2	8.82	21.78	16.1	12	21.59	17.25	11.71	10.25	18.06	14.15	21.75	20.75	15.44	30.11	19.02	10.82	15.03	32.29	9.57		YDR475C	2.13	1.64	1.14	2.66	2.74	2.17	3.4	2.78	0	2.04	4.58	2.35	0.72	2.18	0.36	3.02	2.1	0	0.45	3.43	0	1.94	4.07
YDR476C	15.43	4.09	5.3	16.21	13.55	7.4	16.14	14.96	4.54	9.93	14.88	9.89	4.51	11.39	8.52	7.66	8.23	3.84	18.6	8.28	8.06	6.4	12.49	1.72		YDR476C	19.95	13.83	14.87	19.32	34.31	20.75	24.02	14.2	0	15.67	72.69	22.93	3.7	39.82	0	19.52	21.45	0	5.72	19.78	15.92	15.06	17.16
YDR477W	34.21	12.56	11.36	27.06	29.19	24.23	28.73	35.86	23.09	27.18	28.15	26.76	16.65	27.22	20.03	19.92	19.16	18.43	46.04	23.3	15.45	21.82	39.87	10.07		YDR477W	9.38	4.97	5.44	15.6	15.66	7.69	9.14	0	0	8.27	18.6	11.49	3.45	16.69	0.51	11.87	3	10.51	2.88	13.9	8.9	10.74	13.66
YDR478W	115.2	102.62	101.43	64.27	86.76	79.7	85.35	114.21	75.48	88.8	80.08	54.77	150.07	91.96	103.46	149.87	155.23	125.62	95.02	147.25	104.67	162.24	67.6	110.78		YDR478W	3.25	7.09	3.56	3.42	11.72	1.73	8.78	0	0	2.08	11.05	5.69	2.95	2.86	0	3.28	0	0	0	3.38	0	4.98	4.97
YDR479C	44.93	21.23	30.98	41.13	48.92	30.55	50.75	45.01	40.54	52.29	44.97	32.44	34.29	52.52	36.29	43.05	61.43	37.16	56.38	42.31	42.25	39.89	45.88	31.19		YDR479C	2.94	0.16	1.13	5.34	2.5	0.94	2.6	0	0	2.83	4	2.09	1.2	4.91	0.6	5.23	0	0	1.11	2.94	0	1.25	3.54
YDR480W	14.42	7.55	3.26	11.29	6.87	4.37	19.36	16.29	13.7	24.79	19.73	14.74	22.24	21.39	21.97	20.06	19.14	22.78	31.03	19.38	15.6	23.64	22.67	12.15		YDR480W	6.7	0.3	0.23	6.17	0.43	0	8.22	0	0	3.22	7.97	1.89	2.28	7.85	0	1.69	6.61	0	0	6.26	0	0	6.72
YDR481C	69.66	51.79	45.36	61.36	58.36	75.58	42	81.86	43.74	43.75	85.42	68.94	38.33	72.02	52.63	44.09	44.61	43.24	59.57	58.27	25.91	52.32	60.4	39.41		YDR481C	20.69	25.98	25.92	16.1	35.28	44.36	25.16	9	7.44	9.93	60.13	35.9	6.26	42.15	1.16	17.37	13.6	5.96	5.44	26.15	10.09	26.7	23.23
[truncated: 5,049 more rows]
[truncated: 1 more columns]

## Sheet: rpl22a
ORF	Sample1_40_rna	Sample2_40_rna	Sample3_40_rna	Sample1_45_rna	Sample2_45_rna	Sample3_45_rna	Sample1_50_rna	Sample2_50_rna	Sample3_50_rna	Sample1_55_rna	Sample2_55_rna	Sample3_55_rna	Sample1_60_rna	Sample2_60_rna	Sample3_60_rna	Sample1_65_rna	Sample2_65_rna	Sample3_65_rna	Sample1_70_rna	Sample2_70_rna	Sample3_70_rna	Sample1_75_rna	Sample2_75_rna	Sample3_75_rna		ORF	Sample1_40_ribo	Sample2_40_ribo	Sample3_40_ribo	Sample1_45_ribo	Sample2_45_ribo	Sample3_45_ribo	Sample1_50_ribo	Sample2_50_ribo	Sample3_50_ribo	Sample1_55_ribo	Sample2_55_ribo	Sample3_55_ribo	Sample1_60_ribo	Sample2_60_ribo	Sample3_60_ribo	Sample1_65_ribo	Sample2_65_ribo	Sample3_65_ribo	Sample1_70_ribo	Sample2_70_ribo	Sample3_70_ribo	Sample1_75_ribo	Sample2_75_ribo
[truncated: 6,600 more rows]
[truncated: 1 more columns]

[truncated: 3 more sheets: rpl22b, rpl34a, rpl34b]
