# Supplementary material for: Translational control of methionine and serine metabolic pathways underpin the paralog-specific phenotypes of Rpl22 ribosomal protein mutants in cell division and replicative longevity
Source: bioRxiv preprint, doi:10.1101/2020.02.05.935726, version 1 (2020-02-06)
Supplement: File5 [file 935726_file06.xlsx]

## Sheet: 40fL
wt.vs.rpl22a				wt.vs.rpl22b				wt.vs.rpl34a				wt.vs.rpl34b				rpl22a.vs.rpl22b				rpl22a.vs.rpl34a				rpl22a.vs.rpl34b				rpl22b.vs.rpl34a				rpl22b.vs.rpl34b				rpl34a.vs.rpl34b
babel	DESeq2	intersection		babel	DESeq2	intersection		babel	DESeq2	intersection		babel	DESeq2	intersection		babel	DESeq2	intersection		babel	DESeq2	intersection		babel	DESeq2	intersection		babel	DESeq2	intersection		babel	DESeq2	intersection		babel	DESeq2	intersection
YLR062C	YLR062C	YLR062C		YFL034C-A	YFL034C-A	YFL034C-A		YIL177C	YIL177C	YIL177C		YIL177C	YLR466C-A	YIL177C		YFL034C-A	YFL034C-A	YFL034C-A		YIL177C	YIL177C	YIL177C		YLR466C-A	YLR061W	YLR061W		YIL177C	YIL177C	YIL177C		YIL177C	YLR466C-A	YLR466C-A		YLR466C-A	YLR466C-A	YLR466C-A
YLR061W	YLR061W	YLR061W		YOL050C	YOL050C	YOL050C		YOL050C	YOL050C	YOL050C		YOR396C-A	YLR467C-A	YOR396C-A		YPR160C-A	YEL075W-A	YEL075W-A		YLR159C-A	YLR154C-H	YLR154C-H		YLR467C-A	YLR062C	YLR062C		YER056C-A	YER056C-A	YER056C-A		YOR396C-A	YLR467C-A	YLR467C-A		YLR467C-A	YLR467C-A	YLR467C-A
YOL050C	YOL050C	YOL050C		YEL075C	YEL075C	YEL075C		YER056C-A	YER056C-A	YER056C-A		YLR467C-A	YOR396C-A	YLR467C-A		YHR069C-A	YHR069C-A	YHR069C-A		YLR157C-C	YLR156C-A	YLR156C-A		YOR396C-A	YLR462W	YLR462W		YNL017C	YLR154C-H	YNL017C		YLR467C-A	YOR396C-A	YOR396C-A		YOR396C-A	YOR396C-A	YOR396C-A
YOR108C-A	YOR108C-A	YOR108C-A		YER014C-A	YPR059C	YER014C-A		YKL083W	YGL188C	YKL083W		YLR466C-A	YIL177C	YLR466C-A		YEL075C	YEL075C	YEL075C		YLR156C-A	YLR157C-C	YLR157C-C		YIL177C	YHR126C	YHR126C		YLR154C-H	YLR156C-A	YLR154C-H		YLR466C-A	YIL177C	YIL177C		YFL066C	YIL052C	YIL052C
YDL163W	YJL032W	YDL163W		YPR059C	YER014C-A	YPR059C		YLR154C-H	YLR154C-H	YLR154C-H		YIL052C	YIL052C	YIL052C		Q0182	YBR178W	YBR178W		YLR154C-H	YLR159C-A	YLR159C-A		YBR266C	YOR139C	YOR139C		YLR159C-A	YLR157C-C	YLR159C-A		YBR266C	YBR266C	YBR266C		YIL052C	YBR266C	YBR266C
YJL032W	YHR054C	YJL032W		YIL105W-A	YOR108C-A	YIL105W-A		YLR157C-C	YLR156C-A	YLR157C-C		YKL083W	YKL083W	YKL083W		YKL096C-B	YKL115C	YKL115C		YJR158W	YER056C-A	YER056C-A		YLR159C-A	YHR054C	YHR054C		YLR157C-C	YLR159C-A	YLR157C-C		YLR159C-A	YLR154C-H	YLR154C-H		YER085C	YJR005C-A	YJR005C-A
YHR054C	YDL163W	YHR054C		YBL112C	YIL105W-A	YBL112C		YLR156C-A	YLR157C-C	YLR156C-A		YGL188C	YGL188C	YGL188C		YHL046C	YKL044W	YKL044W		YER056C-A	YDR278C	YDR278C		YLR154C-H	YOR108C-A	YOR108C-A		YLR156C-A	YNL017C	YLR156C-A		YLR156C-A	YLR156C-A	YLR156C-A		YKL223W	YHR217C	YHR217C
YOL002C	YOL002C	YOL002C		YHR218W-A	YBL112C	YHR218W-A		YLR159C-A	YLR159C-A	YLR159C-A		YLR154C-H	YLR154C-H	YLR154C-H		YEL075W-A	YLR377C	YLR377C		YEL032C-A	YFL015W-A	YFL015W-A		YLR157C-C	Q0080	Q0080		YDR278C	YDR278C	YDR278C		YLR157C-C	YLR157C-C	YLR157C-C		YBR266C	YHR219W	YHR219W
YEL050W-A	YEL050W-A	YEL050W-A		YOR108C-A	YHR218W-A	YOR108C-A		YGL188C	YKL083W	YGL188C		YLR156C-A	YLR156C-A	YLR156C-A		YBR178W	YJR095W	YJR095W		YDR278C	YNL017C	YNL017C		YLR156C-A	YPL187W	YPL187W		YHR180W-A	YHR180W-A	YHR180W-A		YLR154C-H	YLR159C-A	YLR159C-A		YER189W	YIL177W-A	YIL177W-A
YIL014C-A	YKL083W	YIL014C-A		YMR158C-A	YMR158C-A	YMR158C-A		YER067C-A	YER067C-A	YER067C-A		YLR157C-C	YLR157C-C	YLR157C-C		YKL115C	YGR108W	YGR108W		YNL017C	YLL066W-B	YLL066W-B		YJR158W	YBR056C-B	YBR056C-B		YLR154W-E	YLR154W-E	YLR154W-E		YNL017C	YNL017C	YNL017C		YJR140W-A	YJL225W-A	YJL225W-A
YKL083W	YAL016C-B	YKL083W		YDL163W	YPR012W	YDL163W		YMR269W	YMR269W	YMR269W		YLR159C-A	YLR159C-A	YLR159C-A		YKL044W	YGR164W	YGR164W		YLL066W-B	YNL338W	YNL338W		YIL052C	YHR125W	YHR125W		YFL015W-A	YFL015W-A	YFL015W-A		YIL052C	YIL052C	YIL052C		YJR005C-A	YPL036W	YPL036W
YLR262C-A	YLR262C-A	YLR262C-A		YPR012W	YMR269W	YPR012W		YKL202W	YKL202W	YKL202W		YMR269W	YMR269W	YMR269W		Q0075	YGR236C	YGR236C		YNL338W	YKL224C	YKL224C		YKL224C	YCL026C-A	YCL026C-A		YNL285W	YNL285W	YNL285W		YJR005C-A	YJR005C-A	YJR005C-A		YOR248W	YOR053W	YOR053W
YOR169C	YIL014C-A	YOR169C		YOL002C	YOL002C	YOL002C		YJL032W	YJL032W	YJL032W		YHR217C	YDL163W	YHR217C		YLR377C	YKR097W	YKR097W		YFL015W-A	YHR180W-A	YHR180W-A		YOL161C	YMR244W	YMR244W		YNL338W	YNL338W	YNL338W		YDR278C	YDR278C	YDR278C		YLL065W	YBL109W	YBL109W
YMR269W	YOR169C	YMR269W		YMR269W	YDL163W	YMR269W		YLR198C	YLR198C	YLR198C		YDL163W	YKL202W	YDL163W		YGR108W	YPL223C	YPL223C		YLR154W-E	YKL202W	YKL202W		YHR217C	YNL205C	YNL205C		YFL015C	YFL015C	YFL015C		YKL224C	YKL224C	YKL224C		YBR072C-A	YAL059C-A	YAL059C-A
YKL066W	YMR269W	YKL066W		YLR262C-A	YLR262C-A	YLR262C-A		YGR008C	YGR008C	YGR008C		YKL202W	YHR217C	YKL202W		YJR095W	YLR307C-A	YLR307C-A		YKL202W	YLR154W-E	YLR154W-E		YLL066W-B	Q0045	Q0045		YGL041C	YKL224C	YGL041C		YLR154W-E	YLR154W-E	YLR154W-E		YML009W-B	YFL068W	YFL068W
YPR012W	YKL066W	YPR012W		YIL014C-A	YPR160C-A	YIL014C-A		YNL017C	YNL017C	YNL017C		YBR266C	YOL050C	YBR266C		YGR236C	YHR139C	YHR139C		YKL224C	YGL188C	YGL188C		YEL032C-A	YBR296C	YBR296C		YKL224C	YGL041C	YKL224C		YHR217C	YHR217C	YHR217C		YKL225W	YLL066W-A	YLL066W-A
YOL106W	YOL106W	YOL106W		YKL083W	YAL068W-A	YKL083W		YBR058C-A	YPR059C	YBR058C-A		YOL050C	YBR266C	YOL050C		YGR164W	YHR126C	YHR126C		YHR180W-A	YFL015C	YFL015C		YJR140W-A	YLR142W	YLR142W		YLL066W-B	YLL066W-B	YLL066W-B		YJR140W-A	YJR140W-A	YJR140W-A		YHR217C	YLL067W-A	YLL067W-A
YJL156W-A	YPR012W	YJL156W-A		YOR169C	YKL083W	YOR169C		YDR281C	YBR058C-A	YDR281C		YHR219W	YHR219W	YHR219W		YKR097W	YMR175W	YMR175W		YGL188C	YKL097C	YKL097C		YLL065W	YEL020C	YEL020C		YLL009C	YLL009C	YLL009C		YEL032C-A	YLL066W-B	YLL066W-B		YHR219W	YBL053W	YBL053W
YER014C-A	YJL156W-A	YER014C-A		YPL119C-A	YIL014C-A	YPL119C-A		YHR138C	YDR281C	YHR138C		YGR008C	YKL224C	YGR008C		YPL223C	YLR157W-D	YLR157W-D		YFL015C	YHR217C	YHR217C		YBL109W	YGR032W	YGR032W		YGR164W	YGR164W	YGR164W		YLL066W-B	YOL161C	YOL161C		YHL046C	YPL058C	YPL058C
YLR154W-B	YLR154W-F	YLR154W-B		YJL032W	YPL119C-A	YJL032W		YPR059C	YHR138C	YPR059C		YFL015C	YGR008C	YFL015C		YLR307C-A	YIL057C	YIL057C		YHR217C	YKL096C-B	YKL096C-B		YKL225W	YER023C-A	YER023C-A		YGR008C	YGR008C	YGR008C		YOL161C	YLL065W	YLL065W		YIL177W-A	YEL040W	YEL040W
YLR154W-F	YBL077W	YLR154W-F		YNL170W	YLR222C-A	YNL170W		YGL029W	YGL029W	YGL029W		YGR169C-A	YFL015C	YGR169C-A		YHR126C	YNL285W	YNL285W		YKL097C	YGL041C	YGL041C		YKL202W	YBR208C	YBR208C		YPR108W-A	YPR108W-A	YPR108W-A		YLL065W	YKL225W	YKL225W		YJL225W-A	YDL210W	YDL210W
YER042W	YLR154W-B	YER042W		YLR264C-A	YOR169C	YLR264C-A		YDR322C-A	YJL188C	YDR322C-A		YOR309C	YLR198C	YOR309C		YLR157W-D	YBR072W	YBR072W		YAR075W	YAR075W	YAR075W		YOR248W	YKR039W	YKR039W		YER067C-A	YER067C-A	YER067C-A		YKL225W	YFL015C	YFL015C		YPL036W	YEL073C	YEL073C
YCL056C	YMR107W	YCL056C		YJR067C	YLR264C-A	YJR067C		YJL188C	YDR322C-A	YJL188C		YLR198C	YOR309C	YLR198C		YHR139C	YNL017C	YNL017C		YGL041C	YER121W	YER121W		YGL188C	Q0275	Q0275		YGR122C-A	YGR122C-A	YGR122C-A		YFL015C	YBL109W	YBL109W		YOR053W	YER187W	YER187W
YBL077W	YCL056C	YBL077W		YJL156W-A	YJL032W	YJL156W-A		YJL189W	YJL189W	YJL189W		YLL065W	YGR169C-A	YLL065W		YMR175W	YJR005C-A	YJR005C-A		YER121W	YAL045C	YAL045C		YLR154W-E	YHR032C-A	YHR032C-A		YKL202W	YKL202W	YKL202W		YBL109W	YNL338W	YNL338W		YBL109W	YBR093C	YBR093C
YMR107W	YPR059C	YMR107W		YOR121C	YGL188C	YOR121C		YNL244C	YLR262C-A	YNL244C		YLR154W-F	YKL225W	YLR154W-F		YIL057C	YLR142W	YLR142W		YAL045C	YLL009C	YLL009C		YDR015C	YPL200W	YPL200W		YBR027C	YBR027C	YBR027C		YLR157W-E	YCL076W	YCL076W		YAL059C-A	YEL075C	YEL075C
YOR102W	YER042W	YOR102W		YOL155W-A	YNL170W	YOL155W-A		YLR262C-A	YNL244C	YLR262C-A		YKL225W	YLL065W	YKL225W		YNL285W	YNL117W	YNL117W		YLL009C	YCR108C	YCR108C		YDR278C	YLR307C-A	YLR307C-A		YAL045C	YAL045C	YAL045C		YNL338W	YCR108C	YCR108C		YFL068W	YER026C	YER026C
YGL226C-A	YLR222C-A	YGL226C-A		YGL188C	YJL015C	YGL188C		YHR081W	YOR108C-A	YHR081W		YNL017C	YLR154W-F	YNL017C		YBR072W	YHR054C	YHR054C		YCR108C	YER038W-A	YER038W-A		YNL338W	YOR329W-A	YOR329W-A		YDR500C	YDR500C	YDR500C		YCR108C	YKL202W	YKL202W		YLL066W-A	YMR244W	YMR244W
YCR024C-B	YHR138C	YCR024C-B		YCL056C	YOL155W-A	YCL056C		YEL033W	YEL010W	YEL033W		YGL029W	YMR326C	YGL029W		YNL017C	YLR062C	YLR062C		YKL096C-B	YBR027C	YBR027C		YLR466C-B	YLL055W	YLL055W		YOR265W	YOR265W	YOR265W		YKL202W	YHR180W-A	YHR180W-A		YLL067W-A	YEL020C	YEL020C
YHR138C	YER014C-A	YHR138C		YKL066W	YJL156W-A	YKL066W		YLR388W	YHR081W	YLR388W		YDR544C	YNL017C	YDR544C		YIR041W	YLR061W	YLR061W		YER038W-A	YLR302C	YLR302C		YCR108C	YOL106W	YOL106W		YHR217C	YCR108C	YHR217C		YHR180W-A	YGL041C	YGL041C		YBL053W	Q0140	Q0140
YLR076C	YNL244C	YLR076C		YBL077W	YOR121C	YBL077W		YOL002C	YLR388W	YOL002C		YJR162C	YCL076W	YJR162C		YLR142W				YBR027C	YBL109W	YBL109W		YDR544C	YJL222W-B	YJL222W-B		YCR108C	YHR217C	YCR108C		YGL041C	YAL069W	YAL069W		YAL068C	YPL187W	YPL187W
YPR059C	YGL226C-A	YPR059C		YJL015C	YJR067C	YJL015C		YOR309C	YOL002C	YOR309C		YBL109W	YGL029W	YBL109W		YJR005C-A				YBL109W	YOR394C-A	YOR394C-A		YFL015C	YNL019C	YNL019C		YNL114C	YNL114C	YNL114C		YHR219W	YHR219W	YHR219W		YLL066W-B	YGL184C	YGL184C
YNL244C	YLR076C	YNL244C		YNL024C	YCL056C	YNL024C		YOR277C	YOR309C	YOR277C		YAL069W	YNL338W	YAL069W		YNL117W				YOR394C-A	YFR032C-A	YFR032C-A		YNL017C	Q0085	Q0085		YPR145C-A	YPR145C-A	YPR145C-A		YAL069W	YBL053W	YBL053W		YPL058C	YDR502C	YDR502C
YNL170W	YCR024C-B	YNL170W		YHR130C	YKL066W	YHR130C		YHR136C	YOR277C	YHR136C		YER067C-A	YOL161C	YER067C-A		YPL114W				YLR302C	YBR285W	YBR285W		YAL069W	YJL032W	YJL032W		YOR394C-A	YER038W-A	YOR394C-A		YBL053W	YDR544C	YDR544C		YEL040W	YJL032W	YJL032W
YCL038C	YOR102W	YCL038C		YDR322C-A	YBL077W	YDR322C-A		YFR032C-A	YFL015W-A	YFR032C-A		YLR068W	YER067C-A	YLR068W		YHR054C				YFR032C-A	YOL161C	YOL161C		YCL073C	YER014C-A	YER014C-A		YER038W-A	YOR394C-A	YER038W-A		YCL076W	YOR053W	YOR053W		YEL073C	YLL055W	YLL055W
YER046W	YER067C-A	YER046W		YDL153C	YHR069C-A	YDL153C		YDR210W	YHR136C	YDR210W		YOR053W	YJR162C	YOR053W		YLR062C				YBR285W	YGR008C	YGR008C		YCL076W	YLR120W-A	YLR120W-A		YKL097C	YLR388W	YKL097C		YDR544C	YGR008C	YGR008C		YDL210W	YLR444C	YLR444C
YPR020W	YDR322C-A	YPR020W		YKL058W	YDR322C-A	YKL058W		YFL015C	YDR210W	YFL015C		YLR154W-E	YDR544C	YLR154W-E		YLR061W				YCL069W	YDR133C	YDR133C		YJR005C-A	YBR222C	YBR222C		YLR388W	YFR032C-A	YLR388W		YOR053W	YAL045C	YAL045C		YHL050W-A	YER056C-A	YER056C-A
YER067C-A	YER046W	YER067C-A		YOR102W	YKL096C-B	YOR102W		YDR119W-A	YFR032C-A	YDR119W-A		YNL338W	YLR068W	YNL338W						YDR133C	YPR108W-A	YPR108W-A		YJR162C	YJL153C	YJL153C		YFR032C-A	YBR058C-A	YFR032C-A		YGR008C	YDR070C	YDR070C		YER187W
YDL153C	YCL038C	YDL153C		YER044C	YNL024C	YER044C		YOR234C	YEL033W	YOR234C		YNR025C	YAL068W-A	YNR025C						YGR008C	YDR544C	YDR544C		YAL045C	YHR139C	YHR139C		YBR058C-A	YBL044W	YBR058C-A		YAL045C	YAL059C-A	YAL059C-A		YEL075C
YJR112W-A	YPR132W	YJR112W-A		YER042W	YHR130C	YER042W		YLR068W	YAL068W-A	YLR068W		YCL076W	YBL109W	YCL076W						YPR108W-A	YCL073C	YCL073C		YGL041C	YIR030W-A	YIR030W-A		YOR234C	YKL097C	YOR234C		YDR070C	YGR122C-A	YGR122C-A		YBR093C
YDR322C-A	YNL170W	YDR322C-A		YOR277C	YDL153C	YOR277C		YNR025C	YFL015C	YNR025C		YCL073C	YLR154W-E	YCL073C						YDR544C	YNL114C	YNL114C		YHR219W	YJL171C	YJL171C		YLR198C	YOR234C	YLR198C		YAL059C-A	YNL285W	YNL285W		YER026C
YOR369C	YDL153C	YOR369C		YNL244C	YKL058W	YNL244C		YEL039C	YLR068W	YEL039C		YHR081W	YOR053W	YHR081W						YCL073C	YGR204C-A	YGR204C-A		YBL053W	Q0250	Q0250		YDR063W	YLR198C	YDR063W		YCL073C	YCL073C	YCL073C		YMR244W
YPR132W	YOR369C	YPR132W		YCL038C	YOR277C	YCL038C		YDR139C	YNR025C	YDR139C		YLL066W-B	YAL069W	YLL066W-B						YOL161C	YOR265W	YOR265W		YKL083W	Q0055	Q0055		YJL026C-A	YDR063W	YJL026C-A		YNL285W	YKL083W	YKL083W		YOR108C-A
YJR058C	YBR196C-A	YJR058C		YOL013W-B	YOL013W-B	YOL013W-B		YHR095W	YGR243W	YHR095W		YDR543C	YLR466C-B	YDR543C						YNL114C	YDR119W-A	YDR119W-A		YAL059C-A	YDL034W	YDL034W		YLR185W	YLR185W	YLR185W		YKL083W	YOR265W	YOR265W		YEL020C
YNL024C	YDL067C	YNL024C		YER046W	YJR079W	YER046W		YGR243W	YLR264C-A	YGR243W		YDR322C-A	YNR025C	YDR322C-A						YOR265W	YBL044W	YBL044W		YFL063W	YIR040C	YIR040C		YBL044W	YJL026C-A	YBL044W		YGR122C-A	YFL063W	YFL063W		YHR214C-E
YDL067C	YHR081W	YDL067C		YNL150W	YER042W	YNL150W		YLR264C-A	YNL338W	YLR264C-A		YLR169W	YCL073C	YLR169W						YDR119W-A	YLR198C	YLR198C		YOL083C-A	YJR073C	YJR073C		YNL266W	YNL266W	YNL266W		YOR265W	YHR087W	YHR087W		Q0140
YOR148C	YPR020W	YOR148C		YHR081W	YNL244C	YHR081W		YAR075W	YOR234C	YAR075W		YFL063W	YLL066W-B	YFL063W						YLR198C	YER067C-A	YER067C-A		YBL108C-A	YNL117W	YNL117W		YDR070C	YDR281C	YDR070C		YFL063W	YGR164W	YGR164W		Q0080
YLR222C-A	YJR112W-A	YLR222C-A		YOR148C	YOR102W	YOR148C		YJR135W-A	YHR214C-E	YJR135W-A		YFR001W	YHR081W	YFR001W						YER067C-A	YKR075C	YKR075C		YGR008C	Q0105	Q0105		YDR281C	YDR070C	YDR281C		YHR087W	YGR115C	YGR115C		YPL187W
YHR081W	YJR058C	YHR081W		YPR020W	YNL150W	YPR020W		YGR182C	YDR139C	YGR182C		YJL189W	YDR543C	YJL189W						YGR204C-A	YBR230C	YBR230C		YOR053W	YIL117C	YIL117C		YKR075C	YKR075C	YKR075C		YGR164W	YDL085C-A	YDL085C-A		YGL184C
YJR073C	YHR072W-A	YJR073C		YIL040W	YER044C	YIL040W		YFR001W	YEL039C	YFR001W		YBL053W	YDR322C-A	YBL053W						YKR075C	YDR500C	YDR500C		YOR309C	YNR075W	YNR075W		YDL085C-A	YBR266C	YDL085C-A		YGR115C	YOR394C-A	YOR394C-A		YBL044W
YIR030W-A	YOR148C	YIR030W-A		YOR006C	YCL038C	YOR006C		YDR342C	YDR119W-A	YDR342C		YCR108C	YFL063W	YCR108C						YBR230C	YBR058C-A	YBR058C-A		YOR394C-A	YJL079C	YJL079C		YBR266C	YDL085C-A	YBR266C		YDL085C-A	YLL009C	YLL009C		YEL030C-A
YHR072W-A	YNL024C	YHR072W-A		YOR170W	YER046W	YOR170W		YNL338W	YFR001W	YNL338W		YJL188C	YJL189W	YJL188C						YDR500C	YJL026C-A	YJL026C-A		YCL069W	YNL142W	YNL142W		YFR003C	YOR314W	YFR003C		YOR394C-A	YBR027C	YBR027C		YDR502C
YLR154W-C	YJR135W-A	YLR154W-C		YCR024C-B	YIL040W	YCR024C-B		YOR285W	YJR135W-A	YOR285W		YHR138C	YFR001W	YHR138C						YBL044W	YHR039C-A	YHR039C-A		YOR265W	YLR222C-A	YLR222C-A		YOR314W	YJL189W	YOR314W		YLL009C	YBL108C-A	YBL108C-A		YPR059C
YJR135W-A	YDR281C	YJR135W-A		YIL029C	YBR196C-A	YIL029C		YHR072W-A	YHR095W	YHR072W-A		YHR007C-A	YLR169W	YHR007C-A						YBR058C-A	YFR003C	YFR003C		YGR115C	YBR220C	YBR220C		YOL109W	YOL109W	YOL109W		YBR027C	YFL015W-A	YFL015W-A		YJL032W
YOR006C	YLR154W-C	YOR006C		YFL017W-A	YHR081W	YFL017W-A		YDR374W-A	YCL065W	YDR374W-A		YBR058C-A	YDR524C-A	YBR058C-A						YHR039C-A	YAL069W	YAL069W		YBR027C	YEL050W-A	YEL050W-A		YJL189W	YFR003C	YJL189W		YGR169C-A	YGR169C-A	YGR169C-A		YNL130C-A
YDR281C	YGL029W	YDR281C		YHR072W-A	YHR072W-A	YHR072W-A		YOR108C-A	YHR072W-A	YOR108C-A		YJL148W	YJL188C	YJL148W						YJL026C-A	YHR050W-A	YHR050W-A		YLR198C	YMR305C	YMR305C		YHR152W	YHR152W	YHR152W		YMR175W	YDR063W	YDR063W		YLL055W
YDR183C-A	YJR073C	YDR183C-A		YJR058C	YOR006C	YJR058C		YER066C-A	YGR182C	YER066C-A		YFR032C-A	YBL053W	YFR032C-A						YFR003C	YMR247W-A	YMR247W-A		YDR070C	YDR055W	YDR055W		YBL109W	YOR189W	YBL109W		YDR063W	YMR175W	YMR175W		Q0297
YER074W-A	YIR030W-A	YER074W-A		YJR079W	YOR170W	YJR079W		YHR214C-E	YGR035C	YHR214C-E		YNL244C	YHR138C	YNL244C						YAL069W	YDR342C	YDR342C		YHR180W-A	YBR076W	YBR076W		YOR189W	YBL109W	YOR189W		YBL108C-A	YLR198C	YLR198C		YEL010W
YJL148W	YJL148W	YJL148W		YMR173W-A	YOR148C	YMR173W-A		YGR035C	YOR285W	YGR035C		YBL112C	YBR058C-A	YBL112C						YJR162C	YKL122C	YKL122C		YLR302C	YDR502C	YDR502C		YDR119W-A	YDR119W-A	YDR119W-A		YLR198C	YOR215C	YOR215C		YLR444C
YMR143W	YHR214C-E	YMR143W		YER074W-A	YGR243W	YER074W-A		YHR180W-A	YDR374W-A	YHR180W-A		YHR218W-A	YCR108C	YHR218W-A						YHR050W-A	YOR135C	YOR135C		YFR003C	YHR165W-A	YHR165W-A		YJR034W	YDL096C	YJR034W		YOR215C	YFR003C	YFR003C		YLL067C
YGL029W	YOR006C	YGL029W		YNL259C	YCR024C-B	YNL259C		YJL148W	YER066C-A	YJL148W		YIL008W	YJL148W	YIL008W						YKL122C	YJR115W	YJR115W		YJR099W	YJL158C	YJL158C		YDL096C	YJR034W	YDL096C		YFR003C	YGL061C	YGL061C		YCR050C
YKL058W	YMR143W	YKL058W		YBR164C	YFL017W-A	YBR164C		YLR167W	YDR342C	YLR167W		YAL068W-A	YBL112C	YAL068W-A						YDR342C	YGL041C-B	YGL041C-B		YER121W	YDR492W	YDR492W		YDR022C	YDR022C	YDR022C		YGL061C	YPR108W-A	YPR108W-A		YBL068W-A
YIL105W-A	YER074W-A	YIL105W-A		YDL067C	YNL259C	YDL067C		YLL020C	YAR075W	YLL020C		YDR139C	YHR218W-A	YDR139C						YFR057W	YDL096C	YDL096C		YGR169C-A	YER152W-A	YER152W-A		YAL069W	YAL069W	YAL069W		YFL015W-A	YPR145C-A	YPR145C-A		YEL076C-A
YOR283W	YDR183C-A	YOR283W		YGL226C-A	YJL169W	YGL226C-A		YFL017W-A	YJL148W	YFL017W-A		YDR163W	YFR032C-A	YDR163W						YOR135C	YNL266W	YNL266W		YHR087W	YCL038C	YCL038C		YKL036C	YLR334C	YKL036C		YPR108W-A	YJR156C	YJR156C		YLR464W
YML009C-A	YNL150W	YML009C-A		YNR025C	YNR025C	YNR025C		YHR039C-A	YLR167W	YHR039C-A		YOL077W-A	YNL244C	YOL077W-A						YJR115W	YBR090C	YBR090C		YDR543C	YPR123C	YPR123C		YDR445C	YKL036C	YDR445C		YJR156C	YGR228W	YGR228W		YPR077C
YHR130C	YMR321C	YHR130C		YJL127C-B	YER074W-A	YJL127C-B		YHR217C	YHR039C-A	YHR217C		YDR281C	YIL008W	YDR281C						YMR247W-A	YGL152C	YGL152C		YJL225W-A	YEL073C	YEL073C		YLR334C	YDR445C	YLR334C		YPR145C-A	YPL124W	YPL124W		YER056C-A
YIL165C	YIL105W-A	YIL165C		YGR243W	YPR020W	YGR243W		YJL202C	YLL020C	YJL202C		YLR264C-A	YDR139C	YLR264C-A						YGL041C-B	YOR309C	YOR309C		YIL177W-A	YHL046W-A	YHL046W-A		YDR342C	YDR342C	YDR342C		YPL124W	YJL026C-A	YJL026C-A		YBL111C
YNL150W	YKL058W	YNL150W		YIL103W	YIL029C	YIL103W		YLL009C	YLL009C	YLL009C		YML062C	YHR007C-A	YML062C						YDL096C	YDR063W	YDR063W		YER038W-A	YNL057W	YNL057W		YGR228W	YOL013W-A	YGR228W		YGR228W	YDR500C	YDR500C
YOR121C	YGL188C	YOR121C		YOR283W	YJL127C-B	YOR283W		YLR327C	YJL202C	YLR327C		YDL153C	YOL077W-A	YDL153C						YNL266W	YBR266C	YBR266C		YDL085C-A	YER184C	YER184C		YOL013W-A	YGR228W	YOL013W-A		YJL026C-A	YAL055W	YAL055W
YBR196C-A	YOR283W	YBR196C-A		YNR074C	YBR164C	YNR074C		YGR209C	YLR327C	YGR209C		YLR262C-A	YDR163W	YLR262C-A						YGL152C	YOR028C	YOR028C		YOR215C	Q0160	Q0160		YLR062C	YDR114C	YLR062C		YDR500C	YIR041W	YIR041W
YOR170W	YHR136C	YOR170W		YJL148W	YJR058C	YJL148W		YGR169C-A	YFL017W-A	YGR169C-A		YER030W	YLR264C-A	YER030W						YBR090C	YDR114C	YDR114C		YOR216C	YNL014W	YNL014W		YKL122C	YLR062C	YKL122C		YCL069W	YOR309C	YOR309C
YHR136C	YER175W-A	YHR136C		YPR100W	YGL029W	YPR100W		YLR146W-A	YNR034W-A	YLR146W-A		YDR119W-A	YDR281C	YDR119W-A						YDR114C	YLL037W	YLL037W		YLL009C	YGR055W	YGR055W		YLR200W	YLR200W	YLR200W		YAL055W	YNL114C	YNL114C
YJR067C	YJL188C	YJR067C		YML009C-A	YDL067C	YML009C-A		YNR034W-A	YLR051C	YNR034W-A		YLR285C-A	YLR262C-A	YLR285C-A						YDR063W	YLR200W	YLR200W		YHR050W-A	YLL058W	YLL058W		YDR114C	YKL122C	YDR114C		YOR309C	YDR543C	YDR543C
YJR086W	YOR121C	YJR086W		YGR209C	YMR173W-A	YGR209C		YOR369C	YGR169C-A	YOR369C		YEL039C	YER030W	YEL039C						YOR309C	YJR034W	YJR034W		YFR049W	YLR237W	YLR237W		YCL073C	YBR090C	YCL073C		YNL114C	YOR216C	YOR216C
YOR089C	YML009C-A	YOR089C		YGL029W	YJL148W	YGL029W		YDR031W	YHR217C	YDR031W		YJL202C	YDL153C	YJL202C						YLL037W	YBL028C	YBL028C		YNL079C	YEL075W-A	YEL075W-A		YBR090C	YCL073C	YBR090C		YIR041W	YPR150W	YPR150W
YBR164C	YNR025C	YBR164C		YDR373W	YHR214C-E	YDR373W		YOR186C-A	YBL026W	YOR186C-A		YHR039C-A	YEL039C	YHR039C-A						YOR028C	YKL091C	YKL091C		YNL114C	YHR032W-A	YHR032W-A		YJL202C	YML053C	YJL202C		YJR162C	YDL130W-A	YDL130W-A
YNR025C	YHR130C	YNR025C		YAL008W	YLR068W	YAL008W		YLR051C	YOR369C	YLR051C		YMR039C	YML062C	YMR039C						YBR266C	YFL063W	YFL063W		YJL026C-A	YDR215C	YDR215C		YML053C	YMR003W	YML053C		YOR216C	YLR185W	YLR185W
YEL033W	YIL165C	YEL033W		YLR068W	YGL226C-A	YLR068W		YLR154W-E	YDR031W	YLR154W-E		YKL082C	YHR039C-A	YKL082C						YDR510C-A	YCR020W-B	YCR020W-B		YHL045W	YOR170W	YOR170W		YER066C-A	YJL202C	YER066C-A		YPR150W	YKL036C	YKL036C
YHR214C-E	YOR089C	YHR214C-E		YDR139C	YDR139C	YDR139C		YBL026W	YCR097W	YBL026W		YDR210W	YDR210W	YDR210W						YJR034W	YOL166C	YOL166C		YGR204C-A	YMR238W	YMR238W		YMR003W	YCR020W-B	YMR003W		YDL130W-A	YBL031W	YBL031W
YGL188C	YKL056C	YGL188C		YOR253W	YOR283W	YOR253W		YGR183C	YOL077W-A	YGR183C		YLR167W	YDR119W-A	YLR167W						YLR200W	YCR083W	YCR083W		YDR063W	YBR056W-A	YBR056W-A		YCR020W-B	YER066C-A	YCR020W-B		YLR185W	YJR037W	YJR037W
YJL188C	YDR139C	YJL188C		YLR460C	YPR100W	YLR460C		YCR097W	YER030W	YCR097W		YDR031W	YJL202C	YDR031W						YFL063W	YOR189W	YOR189W		YAR075W	YGL184C	YGL184C		YDR544C	YBL053W	YDR544C		YBL031W	YNL079C	YNL079C
YER044C	YBR164C	YER044C		YJR073C	YNR074C	YJR073C		YOL077W-A	YLR154W-E	YOL077W-A		YAR075W	YMR039C	YAR075W						YBL028C	YDL085C-A	YDL085C-A		YDL130W-A	YBL042C	YBL042C		YBL053W	YBR089C-A	YBL053W		YJR037W	YIL177W-A	YIL177W-A
YKL056C	YOR170W	YKL056C		YMR251W-A	YIL103W	YMR251W-A		YJR162C	YLR146W-A	YJR162C		YOR089C	YLR285C-A	YOR089C						YKL091C	YJR099W	YJR099W		YML030W	YNL192W	YNL192W		YBR089C-A	YDR544C	YBR089C-A		YKL036C	YJL225W-A	YJL225W-A
YMR150C	YJR079W	YMR150C		YJL169W	YCR018C-A	YJL169W		YER030W	YOR186C-A	YER030W		YLR051C	YLR167W	YLR051C						YCR020W-B	YBL059C-A	YBL059C-A		YAL055W	YER091C	YER091C		YDL061C	YDL061C	YDL061C		YDR543C	YDR445C	YDR445C
YDR139C	YOR277C	YDR139C		YLL055W	YDR373W	YLL055W		YER019C-A	YHR180W-A	YER019C-A		YER066C-A	YLR051C	YER066C-A						YCR083W	YPR142C	YPR142C		YIR019C	YLR157W-D	YLR157W-D		YKL156W	YKL156W	YKL156W		YNL079C	YDR022C	YDR022C
YMR321C	YJR067C	YMR321C		YCR018C-A	YOR253W	YCR018C-A		YHR141C	YGR271C-A	YHR141C		YBL001C	YKL082C	YBL001C						YOR189W	YJL189W	YJL189W		YCR104W	YER065C	YER065C		YMR194W	YGR204C-A	YMR194W		YJL225W-A	YJR099W	YJR099W
YCR102C	YBL026W	YCR102C		YCR020C-A	YML009C-A	YCR020C-A		YLR169W	YHR141C	YLR169W		YBR027C	YER066C-A	YBR027C						YJR099W	YFR010W-A	YFR010W-A		YGL061C	YKL163W	YKL163W		YGR204C-A	YMR194W	YGR204C-A		YIL177W-A	YDL096C	YDL096C
YDR373W	YLR068W	YDR373W		YMR143W	YLR154W-F	YMR143W		YGR271C-A	YBL028C	YGR271C-A		YKL122C	YBR027C	YKL122C						YKL225W	YNL122C	YNL122C		YBR285W	YMR303C	YMR303C		YCR083W	YGL061C	YCR083W		YJR099W	YER038W-A	YER038W-A
YDR492W	YNR034W-A	YDR492W		YDR183C-A	YAL037C-B	YDR183C-A		YLR154W-F	YLR169W	YLR154W-F		YNR024W	YDR031W	YNR024W						YDL085C-A	YER030W	YER030W		YFR010W-A	YOR298W	YOR298W		YGL061C	YCR083W	YGL061C		YDR022C	YML030W	YML030W
YIL040W	YIL040W	YIL040W		YJR135W-A	YMR251W-A	YJR135W-A		YMR256C	YGR209C	YMR256C		YOR215C	YOR089C	YOR215C						YOL166C	YKL118W	YKL118W		YNR077C	YMR084W	YMR084W		YFL063W	YDR210W	YFL063W		YDR445C	YBL001C	YBL001C
YOR277C	YDR373W	YOR277C		YPR132W	YJR135W-A	YPR132W		YBL028C	YLR154W-F	YBL028C		YDR068W	YKL122C	YDR068W						YPR142C	YGR228W	YGR228W		YPL185W	YIL165C	YIL165C		YHR087W	YBR230C	YHR087W		YML030W	YHL030W-A	YHL030W-A
YNR034W-A	YEL033W	YNR034W-A		YGR182C	YPR132W	YGR182C		YBR285W	YPL225W	YBR285W		YCL056C	YBL001C	YCL056C						YBL059C-A	YFR049W	YFR049W		YGR228W	YMR230W-A	YMR230W-A		YHR039C-A	YBL001C	YHR039C-A		YDL096C	YLR200W	YLR200W
YPL117C	YJR086W	YPL117C		YLR154W-F	YGR209C	YLR154W-F		YPL225W	YGR183C	YPL225W		YHR060W	YGR243W	YHR060W						YJL189W	YHR152W	YHR152W		YPL186C	YLR342W-A	YLR342W-A		YMR175W	YHR039C-A	YMR175W		YER038W-A	YFR010W-A	YFR010W-A
YNR020C	YER044C	YNR020C		YIL165C	YOR021C	YIL165C		YDR543C	YIL008W	YDR543C		YKL172W	YDR068W	YKL172W						YFR010W-A	Q0010	Q0010		YMR269W	YMR035W	YMR035W		YBR230C	YHR087W	YBR230C		YBL001C	YJR034W	YJR034W
YBL026W	YCR018C-A	YBL026W		YOR021C	YMR143W	YOR021C		YIL008W	YER158W-A	YIL008W		YGR243W	YHR060W	YGR243W						YLL065W	YDR513W	YDR513W		YBL031W	YBR134W	YBR134W		YBL001C	YHL031C	YBL001C		YHL030W-A	YJL184W	YJL184W
YMR173W-A	YOR285W	YMR173W-A		YAL037C-B	YAL008W	YAL037C-B		YER158W-A	YBR285W	YER158W-A		YLR388W	YKL172W	YLR388W						YNL122C	YOL014W	YOL014W		YMR307C-A	YGL055W	YGL055W		YDR210W	YFL063W	YDR210W		YCR104W	YHL031C	YHL031C
YLR068W	YPL117C	YLR068W		YGR063C	YAL059W	YGR063C		YOR182C	YER019C-A	YOR182C		YBL028C	YMR107W	YBL028C						YER030W	YNL079C	YNL079C		YFR032C-A	YHR130C	YHR130C		YHL031C	YMR175W	YHL031C		YFR010W-A	YFR033C	YFR033C
YOR285W	YMR150C	YOR285W		YIL020C-A	YDR183C-A	YIL020C-A		YDR163W	YJR162C	YDR163W		YLR327C	YBL028C	YLR327C						YKL118W	YGR082W	YGR082W		YPL124W	YHL016C	YHL016C		YFR010W-A	YFR010W-A	YFR010W-A		YLR200W	YOR314W	YOR314W
YJL142C	YGR034W	YJL142C		YBR244W	YNL147W	YBR244W		YBR027C	YBR027C	YBR027C		YMR107W	YLR327C	YMR107W						YFR049W	YLR185W	YLR185W		YDL096C	YPL058C	YPL058C		YHL030W-A	YHL030W-A	YHL030W-A		YJR034W	YDR114C	YDR114C
YGR063C	YFR001W	YGR063C		YOL162W	YGR035C	YOL162W		YHR218W-A	YOR182C	YHR218W-A		YOR257W	YCL056C	YOR257W						YGR228W	YLR388W	YLR388W		YPR151C	YBR291C	YBR291C		YBR269C	YBL028C	YBR269C		YHL031C	YPL186C	YPL186C
YNL013C	YDR492W	YNL013C		YBR013C	YLR460C	YBR013C		YBL112C	YDR163W	YBL112C		YOR285W	YOR215C	YOR285W						YHR152W	YNL332W	YNL332W		YGR025W	YLR121C	YLR121C		YBL059C-A	YBR269C	YBL059C-A		YJL184W	YOR189W	YOR189W
YGR034W	YIL111W	YGR034W		YAL059W	YKL056C	YAL059W		YNL162W	YMR256C	YNL162W		YLL009C	YNR024W	YLL009C						YNL332W	YHR059W	YHR059W		YMR247W-A	Q0060	Q0060		YBL028C	Q0010	YBL028C		YFR033C	YNL266W	YNL266W
YIL111W	YNL013C	YIL111W		YNL147W	YJR073C	YNL147W		YDR133C	YDR543C	YDR133C		YKL018C-A	YLR388W	YKL018C-A						Q0010	YBR089C-A	YBR089C-A		YKL122C	YMR034C	YMR034C		YGR082W	YBL059C-A	YGR082W		YPL186C	YOL052C-A	YOL052C-A
YJR079W	YPR087W	YJR079W		YJR112W-A	YLL055W	YJR112W-A		YOR121C	YBL112C	YOR121C		YMR311C	YLL009C	YMR311C						YDR513W	YPL185W	YPL185W		YNL180C	YER152C	YER152C		YER030W	YER030W	YER030W		YOR314W	YIR019C	YIR019C
YNR074C	YOR021C	YNR074C		YOR285W	YCR020C-A	YOR285W		YGR161W-C	YHR218W-A	YGR161W-C		YML030W	YOR285W	YML030W						YOL014W	YNL173C	YNL173C		YFL015W-A	YEL042W	YEL042W		YAR075W	YGR082W	YAR075W		YDR114C	YOR073W-A	YOR073W-A
YPR087W	YNR020C	YPR087W		YKL056C	YOR285W	YKL056C		YOR167C	YKL122C	YOR167C		YDL240C-A	YPL225W	YDL240C-A						YGR082W	YLR275W	YLR275W		YJR118C	YBR005W	YBR005W		YPL250C	YDR067C	YPL250C		YOL052C-A	YKL122C	YKL122C
YCR018C-A	YCR102C	YCR018C-A		YGR035C	YGR182C	YGR035C		YKL122C	YNL162W	YKL122C		YPL225W	YMR311C	YPL225W						YNL079C	YKL036C	YKL036C		YLR200W	YJL169W	YJL169W		YDL130W-A	YPL250C	YDL130W-A		YOR189W	YFR032C-B	YFR032C-B
YDR276C	YMR173W-A	YDR276C		YLR043C	YGR063C	YLR043C		YPR087W	YGR161W-C	YPR087W		YPR087W	YPL146C	YPR087W						YLR264C-A	YJL007C	YJL007C		YPR142C	YIR032C	YIR032C		YDR067C	YDL130W-A	YDR067C		YIR019C	YLR282C	YLR282C
YOR021C	YGR063C	YOR021C		YNL211C	YIL165C	YNL211C		YCR075W-A	YJR079W	YCR075W-A		YDR424C	YAR075W	YDR424C						YLR388W	YDL130W-A	YDL130W-A		YLR282C	YDR433W	YDR433W		YJL184W	YAR075W	YJL184W		YNL266W	YOL013W-A	YOL013W-A
YFR001W	YDR276C	YFR001W		YPL273W	YIL020C-A	YPL273W		YCL073C	YML047W-A	YCL073C		YOR234C	YDR363W-A	YOR234C						YHR059W	YLR214W	YLR214W		YDR114C	YOR306C	YOR306C		YPR150W	YJL184W	YPR150W		YOR073W-A	YFR032C-A	YFR032C-A
YNL043C	YNR074C	YNL043C		YBR166C	YOL162W	YBR166C		YOR169C	YOR121C	YOR169C		YEL033W	YER158W-A	YEL033W						YLR185W	YOR388C	YOR388C		YFL014W	YER144C	YER144C		Q0010	YPR150W	Q0010		YKL122C	YPL185W	YPL185W
YIL020C-A	YNL043C	YIL020C-A		YPL052W	YLR043C	YPL052W		YDR183C-A	YDR133C	YDR183C-A		YHR095W	YOR234C	YHR095W						YPL185W	YER152C	YER152C		YIL142C-A	YGL217C	YGL217C		YHR059W	YLR167W	YHR059W		YFR032C-B	YGR018C	YGR018C
YMR230W-A	YJL015C	YMR230W-A		YGR037C	YFR001W	YGR037C		YER042W	YNL266W	YER042W		YIR019C	YOR257W	YIR019C						YBR089C-A	YOR306C	YOR306C		YBL001C	YBR093C	YBR093C		YJR005C-A	YFR033C	YJR005C-A		YLR282C	YBR269C	YBR269C
YPL271W	YOR253W	YPL271W		YDL212W	YBR244W	YDL212W		YNL266W	YCL073C	YNL266W		YCR075W-A	YPR087W	YCR075W-A						YNL173C	YLR174W	YLR174W		YJR156C	YER056C	YER056C		YFR033C	YDR363W-A	YFR033C		YOL013W-A	YCR083W	YCR083W
YOR253W	YJL142C	YOR253W		YHR214C-E	YDL212W	YHR214C-E		YCL056C	YPR132W	YCL056C		YFL017W-A	YDL240C-A	YFL017W-A						YJL007C	YNL202W	YNL202W		YDR500C	YJL156W-A	YJL156W-A		YLR167W	YOL014W	YLR167W		YPL185W	YLR334C	YLR334C
YDL115C	YKR039W	YDL115C		YPL211W	YBR013C	YPL211W		YAL068W-A	YEL050W-A	YAL068W-A		YPL146C	YFR057W	YPL146C						YER078W-A	YJL156W-A	YJL156W-A		YJR037W	YBR295W	YBR295W		YOR215C	YHR059W	YOR215C		YFR032C-A	YMR169C	YMR169C
YKR039W	YIL008W	YKR039W		YNL009W	YPL211W	YNL009W		YPR132W	YOR167C	YPR132W		YDR363W-A	YJR135W-A	YDR363W-A						YDR543C	Q0045	Q0045		YFR057W	YLR120C	YLR120C		YDR363W-A	YOR215C	YDR363W-A		YCL068C	YPR142C	YPR142C
YBR056C-B	YBL036C	YBR056C-B		YLR036C	YHR138C	YLR036C		YOR052C	YMR260C	YOR052C		YDR177W	YDR424C	YDR177W						YLR275W	YLR044C	YLR044C		YGL041C-B	YIL047C	YIL047C		YOL014W	YNL079C	YOL014W		YGR018C	YBR051W	YBR051W
YLR367W	YJL169W	YLR367W		YFR001W	YNL211C	YFR001W		YDL153C	YPR087W	YDL153C		YJR135W-A	YNL266W	YJR135W-A						YDL130W-A	YCL026C-A	YCL026C-A		YGL158W	YIL108W	YIL108W		YNL079C	YLR275W	YNL079C		YMR169C	YPR102C	YPR102C
YER188W	YDL115C	YER188W		YCR102C	YJR112W-A	YCR102C		YOR210W	YOR052C	YOR210W		YER158W-A	YML030W	YER158W-A						YKL036C	YKL029C	YKL029C		YJR034W	YNL044W	YNL044W		YDL069C	YGL188C-A	YDL069C		YBR269C	YJR118C	YJR118C
YBL036C	YLR367W	YBL036C		YEL039C	YEL039C	YEL039C		YEL050W-A	YOR169C	YEL050W-A		YPR188C	YKL018C-A	YPR188C						YAR020C	YIL047C	YIL047C		YCR083W	YNR041C	YNR041C		YLR275W	YDR133C	YLR275W		YCR083W	YOR146W	YOR146W
YNR024W	YHR141C	YNR024W		YOR210W	YBL026W	YOR210W		YNL170W	YDL163W	YNL170W		YPR142C	YPR142C	YPR142C						YLR154W-A	YPL278C	YPL278C		YFL058W	YNL202W	YNL202W		YGL188C-A	YGR018C	YGL188C-A		YBR051W	YDL181W	YDL181W
YGR106C	YGR106C	YGR106C		YLR076C	YOR210W	YLR076C		YMR260C	YCL056C	YMR260C		YHR191C	YDR177W	YHR191C						YIL153W	YHL028W	YHL028W		YJR115W	YKL102C	YKL102C		YGR018C	YDL069C	YGR018C		YLR334C	YML026C	YML026C
YAL008W	YGR243W	YAL008W		YGL091C	YDL016C	YGL091C		YMR039C	YMR039C	YMR039C		YJR087W	YML047W-A	YJR087W						YLR214W	YBR220C	YBR220C		YPR108W-A	YOR153W	YOR153W		YPR142C	YPR142C	YPR142C		YPR142C	YMR194W	YMR194W
YIL103W	YMR230W-A	YIL103W		YHR138C	YPL273W	YHR138C		YDR500C	YDR183C-A	YDR500C		YLR043C	YBR285W	YLR043C						YER152C	YMR238W	YMR238W		YHR039C-A	YEL046C	YEL046C		YDR133C	YJR005C-A	YDR133C		YPR102C	YGL108C	YGL108C
YGL030W	YIL020C-A	YGL030W		YGR183C	YER067C-A	YGR183C		YDL067C	YOR210W	YDL067C		YNL266W	YJR087W	YNL266W						YOR388C	YER065C	YER065C		YKL118W	YIL160C	YIL160C		YDR374W-A	YBL092W	YDR374W-A		YJR118C	YOR218C	YOR218C
YPL142C	YNR024W	YPL142C		Q0160	YPL237W	Q0160		YKL156W	YER126C	YKL156W		YOR369C	YOR369C	YOR369C						YFL067W	YBR291C	YBR291C		YKR040C	YNL024C	YNL024C		YBL092W	YJR087W	YBL092W		YFL058W	YCL022C	YCL022C
YNL070W	YPL271W	YNL070W		YIL111W	YNL009W	YIL111W		YML047W-A	YDL153C	YML047W-A		YLL020C	YPR187W	YLL020C						YLR174W	YPL119C-A	YPL119C-A		YKL117W	YPR202W	YPR202W		YJR087W	YDR374W-A	YJR087W		YOR146W	YDL041W	YDL041W
YDR336W	YLR051C	YDR336W		YLR227C	YIL111W	YLR227C		YCR020W-B	YCR020W-B	YCR020W-B		YBR285W	YFL017W-A	YBR285W						YPL278C	YDR433W	YDR433W		YDR512C	YER081W	YER081W		YJL188C	YJL188C	YJL188C		YDL181W	YNL180C	YNL180C
YIL008W	YDR336W	YIL008W		YMR150C	YGR183C	YMR150C		YLR275W	YER042W	YLR275W		YPL013C	YLR154W-C	YPL013C						YJL156W-A	YFL067W	YFL067W		YHR185C	YGL126W	YGL126W		YER121W	YGL088W	YER121W		YML026C	YFL058W	YFL058W
YDR410C	YER158W-A	YDR410C		YPL148C	YGR037C	YPL148C		YER126C	YKL156W	YER126C		YLR154W-C	YNL079C	YLR154W-C						YOR306C	YKR039W	YKR039W		YJL184W	YHR182C-A	YHR182C-A		YLR021W	YFR036W	YLR021W		YMR194W	YDR512C	YDR512C
YHR141C	YNL235C	YHR141C		YER071C	YLR076C	YER071C		YHR007C-A	YBR162W-A	YHR007C-A		YNL079C	YLR043C	YNL079C						YNL202W	YJL158C	YJL158C		YCL022C	YDL210W	YDL210W		YFR036W	YLR021W	YFR036W		YGL108C	YGR146C	YGR146C
YMR119W-A	YNL147W	YMR119W-A		YLR104W	YNL235C	YLR104W		YJR079W	YKL096C-B	YJR079W		YDR196C	YIR019C	YDR196C						YCL026C-A	YKL217W	YKL217W		YKL036C	YKR097W	YKR097W		YGL088W	YML026C	YGL088W		YOR218C	YML053C	YML053C
YNL259C	YPL142C	YNL259C		YEL033W	YLR036C	YEL033W		YER074W-A	YPL146C	YER074W-A		YGR182C	YEL033W	YGR182C						YER014C-A	YPR001W	YPR001W		YLR012C	YAL053W	YAL053W		YML026C	YER121W	YML026C		YCL022C	YGR204C-A	YGR204C-A
YGR209C	YBR056C-B	YGR209C		YMR211W	YGR024C	YMR211W		YDL163W	YLR275W	YDL163W		YBL107C	YHR141C	YBL107C						Q0045	YHL046W-A	YHL046W-A		YFR033C	YEL035C	YEL035C		YGL152C	YNL122C	YGL152C		YDL041W	YML064C	YML064C
YNL147W	YGL030W	YNL147W		YNR024W	YBR166C	YNR024W		YDR424C	YDR500C	YDR424C		YPR187W	YLL020C	YPR187W						YLR044C	YMR305C	YMR305C		YLR273C	YCR010C	YCR010C		YNL122C	YPR102C	YNL122C		YNL180C	YHR152W	YHR152W
YOL086W-A	YER126C	YOL086W-A		YML001W	YML108W	YML001W		YBR085C-A	YKL056C	YBR085C-A		YDR500C	YHR095W	YDR500C						YBR220C	YDR215C	YDR215C		YOR135C	YDR481C	YDR481C		YPR102C	YGL152C	YPR102C		YDR512C	YDR363W-A	YDR363W-A
YMR251W-A	YAL059W	YMR251W-A		YPL237W	YNR024W	YPL237W		YKL066W	YBR085C-A	YKL066W		YNL162W	YPR188C	YNL162W						YKL029C	YJL079C	YJL079C		YHL031C	YBL015W	YBL015W		YBR051W	YGL041C-B	YBR051W		YGR146C	YLR273C	YLR273C
YGL055W	YNL259C	YGL055W		YBL026W	YNR034W-A	YBL026W		YBR162W-A	YPR187W	YBR162W-A		YHR141C	YHR191C	YHR141C						YPL119C-A	YIL108W	YIL108W		YOR028C	YER017C	YER017C		YHR138C	YHR138C	YHR138C		YML053C	YGR146C-A	YGR146C-A
YPR016W-A	YIL103W	YPR016W-A		YGR024C	YCR102C	YGR024C		YDL050C	YDL067C	YDL050C		YDR063W	YGL041C	YDR063W						YIL047C	YIL117C	YIL117C		YLL037W	Q0050	Q0050		YGL041C-B	YNL162W	YGL041C-B		YLR273C	YBR084C-A	YBR084C-A
YNL057W	YPL211W	YNL057W		YML108W	YMR211W	YML108W		YPL146C	YFR057W	YPL146C		YML047W-A	YNL162W	YML047W-A						YMR238W	YLR377C	YLR377C		YLR458W	YAL054C	YAL054C		YNL162W	YOR186C-A	YNL162W		YML064C	YLR062C	YLR062C
YJL015C	YJL189W	YJL015C		YBR012C	YPL052W	YBR012C		YKL056C	YER074W-A	YKL056C		YHR001W-A	YDR196C	YHR001W-A						YER065C	YMR303C	YMR303C		YOR073W-A	YEL032W	YEL032W		YJR156C	YGR259C	YJR156C		YHR185C	YDL061C	YDL061C
YGR243W	YMR251W-A	YGR243W		YER067C-A	YGR106C	YER067C-A		YPR010C-A	YOR293W	YPR010C-A		YKL076C	YBR162W-A	YKL076C						YBR291C	YKL163W	YKL163W		YER030W	Q0130	Q0130		YOR186C-A	YDR339C	YOR186C-A		YDR363W-A	YLR458W	YLR458W
YNL235C	YML047W-A	YNL235C		YMR071C	YGL091C	YMR071C		YNR032C-A	YBL077W	YNR032C-A		YLR290C	YCR097W	YLR290C						YHL028W	YIR030W-A	YIR030W-A		YGL152C	YER005W	YER005W		YGR259C	YDL121C	YGR259C		YHR152W	YGL226W	YGL226W
YIL060W	YGL055W	YIL060W		YNL235C	YGR271C-A	YNL235C		YHR021C	YOR021C	YHR021C		YIL098C	YDR500C	YIL098C						YDR433W	YKR097W	YKR097W		YOR189W	YMR007W	YMR007W		YER188C-A	YJR156C	YER188C-A		YGR204C-A	YER030W	YER030W
YLR051C	YOL164W-A	YLR051C		YER188W	YMR150C	YER188W		YBL077W	YPR010C-A	YBL077W		YHR180W-A	YIL098C	YHR180W-A						YKR039W	YIL165C	YIL165C		YNL266W	YJL052W	YJL052W		YKL083W	YGR146C-A	YKL083W		YBR084C-A	YHR185C	YHR185C
YKL053C-A	YAL008W	YKL053C-A		YHR148W	YOL124C	YHR148W		YOR102W	YDR424C	YOR102W		YNL228W	YOL002C	YNL228W						YJL158C	YGL156W	YGL156W		YDR022C	YGL156W	YGL156W		YDL121C	YGR146C	YDL121C		YGL226W	YHR050W-A	YHR050W-A
YER158W-A	YER188W	YER158W-A		YNL100W	YPL148C	YNL100W		YPR187W	YDL050C	YPR187W		YIL111W	YCR075W-A	YIL111W						YKL217W	YPL062W	YPL062W		YJR159W	Q0065	Q0065		YDR339C	YBR051W	YDR339C		YDL061C	YPR131C	YPR131C
YBR258C	YBL112C	YBR258C		YDR381C-A	YAL064W	YDR381C-A		YDR544C	YKL066W	YDR544C		YNL215W	YDR278C	YNL215W						YPR001W	YER152W-A	YER152W-A		YDR119W-A	YOL002C	YOL002C		YGL226W	YKL083W	YGL226W		YLR458W	YLR154W-F	YLR154W-F
YPL211W	YHR218W-A	YPL211W		YGR106C	YML001W	YGR106C		YGR034W	YNL170W	YGR034W		YLR275W	YPL013C	YLR275W						YNL019C	YLR157W-D	YLR157W-D		YDL181W	YBR240C	YBR240C		YGR146C-A	YGL226W	YGR146C-A		YGR146C-A	YKL117W	YKL117W
YDR381C-A	YNL070W	YDR381C-A		YDR327W	YJL188C	YDR327W		YKL082C	YGR034W	YKL082C		YOL002C	YHR001W-A	YOL002C						YHR125W	YBR208C	YBR208C		YHL030W-A	YLR154W-B	YLR154W-B		YGR146C	YML028W	YGR146C		YER030W	YDL244W	YDL244W
YJL169W	YDR447C	YJL169W		YDR433W	YDR381C-A	YDR433W		YOR021C	YCR075W-A	YOR021C		YCR097W	YNL133C	YCR097W						YLR466W	YGL217C	YGL217C		YBL048W	YER060W-A	YER060W-A		YJR099W	YNL174W	YJR099W		YLR154W-F	YJL202C	YJL202C
YAL059W	YDR410C	YAL059W		YDR319C	YEL033W	YDR319C		YOR293W	YHR021C	YOR293W		YNL133C	YKL076C	YNL133C						YHL046W-A	YHR139C	YHR139C		YDR162C	YKL217W	YKL217W		YDR461C-A	YER188C-A	YDR461C-A		YPR131C	YDR162C	YDR162C
YER126C	YOL086W-A	YER126C		YOL124C	YLR227C	YOL124C		YLR367W	YHR060W	YLR367W		YBR162W-A	YBL107C	YBR162W-A						YIL173W	YAL054C	YAL054C		YDL099W	YPR128C	YPR128C		YML028W	YJR099W	YML028W		YLR062C	YLR169W	YLR169W
YEL012W	YDR381C-A	YEL012W		YPL117C	YOR089C	YPL117C		YKL076C	YKL082C	YKL076C		YLR367W	YLR275W	YLR367W						YMR305C	YLR142W	YLR142W		YKL091C	YJR077C	YJR077C		YNL174W	YDR461C-A	YNL174W		YKL117W	YLR311C	YLR311C
YEL017C-A	YPL237W	YEL017C-A		YJR157W	YHR136C	YJR157W		YBL107C	YLR367W	YBL107C		YGL041C	YIL111W	YGL041C						YJL079C	YIL160C	YIL160C		YMR159C	YER073W	YER073W		YPL186C	YFR032C-B	YPL186C		YJR159W	YMR118C	YMR118C
YBL018C	YEL012W	YBL018C		YBR258C	Q0160	YBR258C		YHR060W	YNR032C-A	YHR060W		YPR132W	YJR005C-A	YPR132W						YLR377C	YNL057W	YNL057W		YDL204W	YPL111W	YPL111W		YFR032C-B	YJL190C	YFR032C-B		YDR162C	YER188C-A	YER188C-A
YPR100W	YOL124C	YPR100W		YOR089C	YNL100W	YOR089C		YER053C-A	YKL172W	YER053C-A		YBL036C	YPR132W	YBL036C						YIR030W-A	YIR040C	YIR040C		YOL071W	YEL075C	YEL075C		YJL190C	YHR050W-A	YJL190C		YER188C-A	YOL099C	YOL099C
YMR035W	YGR169C-A	YMR035W		YML022W	YLR104W	YML022W		YDR177W	YDR544C	YDR177W		YKL041W	YGR182C	YKL041W						YIL117C	YHR032W-A	YHR032W-A		YNL174W	YOR169C	YOR169C		YOL077W-A	YOL077W-A	YOL077W-A		YLR169W	YHR060W	YHR060W
YCR018C	YGR209C	YCR018C		YNR034W-A	YER071C	YNR034W-A		YKL172W	YDR363W-A	YKL172W		YMR260C	YMR260C	YMR260C						YIL108W	YDL034W	YDL034W		YMR323W	YEL020W-A	YEL020W-A		YNL081C	YPL186C	YNL081C		YDL244W	YJL189W	YJL189W
YLR147C	YPR100W	YLR147C		YNL044W	YPL117C	YNL044W		YJR087W	YOR102W	YJR087W		YDR278C	YGR271C-A	YDR278C						YMR303C	YLR154W-B	YLR154W-B		YKL097C	YHR069C-A	YHR069C-A		YPL185W	YNL081C	YPL185W		YLR311C	YJR159W	YJR159W
YOR186C-A	YNL057W	YOR186C-A		YGR232W	YBR012C	YGR232W		YPR188C	YHR007C-A	YPR188C		YGR271C-A	YDR063W	YGR271C-A						YKL163W	YHR165W-A	YHR165W-A		YDR158W	YJR095W	YJR095W		YOR309C	YGL108C	YOR309C		YHR050W-A	YKR083C	YKR083C
YGR141W	YIL060W	YGR141W		YGR271C-A	YMR071C	YGR271C-A		YCR082W	YKL076C	YCR082W		YFR003C	YLR367W	YFR003C						YLR157W-D	YCR010C	YCR010C		YDL062W	YLR390W-A	YLR390W-A		YGL108C	YDR199W	YGL108C		YMR118C	YDR521W	YDR521W
YDR447C	YLR043C	YDR447C		YNR020C	YOR369C	YNR020C		YFL063W	YCR082W	YFL063W		YCR020W-B	YBL036C	YCR020W-B						YPL062W	YBR056C-B	YBR056C-B		YPR150W	YER061C	YER061C		YLR311C	YOR309C	YLR311C		YJL202C	YLR181C	YLR181C
YPL052W	YGR271C-A	YPL052W		YOR369C	YER188W	YOR369C		YLR043C	YDR177W	YLR043C		YDR529C	YCR020W-B	YDR529C						YIL165C	YNL014W	YNL014W		YKL162C	Q0075	Q0075		YHR050W-A	YHR060W	YHR050W-A		YOL099C	YOL109W	YOL109W
YLL020C	YMR260C	YLL020C		YLL020C	YOL164W-A	YLL020C		YDR363W-A	YJR087W	YDR363W-A		YJL049W	YLR290C	YJL049W						YDR215C	YNL117W	YNL117W		YLR185W	YLR377C	YLR377C		YHR060W	YLR311C	YHR060W		YML084W	YER067C-A	YER067C-A
YLR043C	YBR258C	YLR043C		YDR276C	YDR276C	YDR276C		YGL103W	YKL137W	YGL103W		YOR265W	YDR529C	YOR265W						YKR097W	YNL205C	YNL205C		YKR075C	YDR400W	YDR400W		YDR199W	YPL185W	YDR199W		YDR521W	YJR087W	YJR087W
YPL237W	YMR158C-A	YPL237W		YLR046C	YBR258C	YLR046C		YPL143W	YFL063W	YPL143W		YIL002W-A	YIL002W-A	YIL002W-A						YGL217C	YJR095W	YJR095W		YBR090C	YLL056C	YLL056C		YPL278C	YBR162W-A	YPL278C		YHR060W	YFL014W	YFL014W
YJL189W	YMR119W-A	YJL189W		YDR005C	YDR327W	YDR005C		YOL166C	YPR012W	YOL166C		YKL160W	YNL228W	YKL160W						YGL156W	YPL200W	YPL200W		YOR304C-A	YEL060C	YEL060C		YLR236C	YPR131C	YLR236C		YLR181C	YFR049W	YFR049W
YPL197C	YOR293W	YPL197C		YHR136C	YDR336W	YHR136C		YBR089C-A	YGL103W	YBR089C-A		YGL103W	YJR079W	YGL103W						YER152W-A	YGR032W	YGR032W		YOR282W	YKL198C	YKL198C		YJL156W-A	YCR071C	YJL156W-A		YKR083C	YNL174W	YNL174W
YFL017W-A	YCR028C-A	YFL017W-A		YDR370C	YJR157W	YDR370C		YKL137W	YDL136W	YKL137W		YPL170W	YDL085C-A	YPL170W						YBR208C	YHR032C-A	YHR032C-A		YDR513W	YGL226C-A	YGL226C-A		YBR220C	YKL123W	YBR220C		YJL189W	YBR090C	YBR090C
YPR134W	YER002W	YPR134W		YLR008C	YCR097W	YLR008C		YML062C	YBL107C	YML062C		YHR121W	YOR265W	YHR121W						YHR139C	YLR307C-A	YLR307C-A		YKL096C-B	YPR020W	YPR020W		YCR025C	YBR089W	YCR025C		YFL014W	YMR159C	YMR159C
YER002W	YLL020C	YER002W		YDL115C	YML022W	YDL115C		YOR089C	YLR043C	YOR089C		YDL065C	YNL215W	YDL065C						YIR040C	YPL036W	YPL036W		YBL059C-A	YHL012W	YHL012W		YMR194C-A	YML030W	YMR194C-A		YFR049W	YBR157C	YBR157C
YOL124C	YDR374W-A	YOL124C		YBL018C	YLL020C	YBL018C		YNL043C	YOR089C	YNL043C		YPL090C	YGL103W	YPL090C						YAL054C	YHR126C	YHR126C		YBL028C	YLR400W	YLR400W		YBR063C	YCR003W	YBR063C		YOL109W	YDR199W	YDR199W
YBR062C	YLR147C	YBR062C		YDR336W	YHR148W	YDR336W		YPR012W	YNL122C	YPR012W		YDR342C	YHR121W	YDR342C						YNL057W	YER023C-A	YER023C-A		YFR032C-B	YDR344C	YDR344C		YER044C-A	YJR037W	YER044C-A		YBR157C	YCR013C	YCR013C
YGL091C	YDL212W	YGL091C		YJL188C	YBL018C	YJL188C		YMR251W-A	YPR188C	YMR251W-A		YDR374W-A	YPL090C	YDR374W-A						YHR182C-A	YOR139C	YOR139C		YBR230C	YKL004W	YKL004W		YOR291W	YDL041W	YOR291W		YJR087W	YOR282W	YOR282W
YGR169C-A	YPR134W	YGR169C-A		YER009W	YMR260C	YER009W		YLR285C-A	YHL015W	YLR285C-A		YOR194C	YGR280C	YOR194C						YLR142W	YHR054C	YHR054C		YBR269C	YOR348C	YOR348C		YPL272C	YBR285W	YPL272C		YBR090C	YIL142C-A	YIL142C-A
YBR093C	YBL018C	YBR093C		YGR075C	YLR046C	YGR075C		YGL080W	YBL001C	YGL080W		YDL067C	YOR020W-A	YDL067C						YIL160C	YLR462W	YLR462W		YOR041C	Q0255	Q0255		YMR238W	YDR016C	YMR238W		YER067C-A	YBR089W	YBR089W
YBL112C	YBR062C	YBL112C		YER026C	YDR319C	YER026C		YDR079W	YNL043C	YDR079W		YOR020W-A	YBL108C-A	YOR020W-A						YDL034W	YLR062C	YLR062C		YLR181C	YPR153W	YPR153W		YLR379W	YER131W	YLR379W		YMR159C	YKR075C	YKR075C
YHR218W-A	YOR210W	YHR218W-A		YBR024W	YDR005C	YBR024W		YDR016C	YMR321C	YDR016C		YGR183C	YDR374W-A	YGR183C						YHR032W-A	YLR061W	YLR061W		YMR169C	YNL220W	YNL220W		YKR045C	YJR023C	YKR045C		YNL174W	YOL071W	YOL071W
YCR028C-A	YPR010C-A	YCR028C-A		YHL012W	YDR433W	YHL012W		YDL136W	YMR251W-A	YDL136W		YOR094W	YDL065C	YOR094W						YML009W-B	YHR095W			YMR194W	YEL063C	YEL063C		YBL073W	YPL238C	YBL073W		YCR013C	YGR025W	YGR025W
YDR374W-A	YGR141W	YDR374W-A		YER099C	YDL115C	YER099C		YHL015W	YGR106C	YHL015W		YGR106C	YKL041W	YGR106C						YLR154W-B	YLR334C			YMR315W	YER070W	YER070W		YDR215C	YDR512C	YDR215C		YDR199W	YOL077W-A	YOL077W-A
YLR036C	YKL053C-A	YLR036C		YMR256C	YDR370C	YMR256C		YGR106C	YPL143W	YGR106C		YIL139C	YJL049W	YIL139C						YHR165W-A	YDR022C			YHR060W	YGR138C	YGR138C		YHR212C	YOR218C	YHR212C		YOR282W	YOR304C-A	YOR304C-A
YPR010C-A	YLR198C	YPR010C-A		YPL095C	YNR020C	YPL095C		YBL001C	YMR107W	YBL001C		YGR115C	YGR106C	YGR115C						YNL205C	YGR161W-C			YML064C	YDL217C	YDL217C		YAR060C	YLR325C	YAR060C		YIL142C-A	YBL059C-A	YBL059C-A
YDL009C	YFL017W-A	YDL009C		YDR410C	YGR232W	YDR410C		YNL122C	YDR002W	YNL122C		YDL085C-A	YKL160W	YDL085C-A						YBR056C-B	YDL121C			YPR148C	YOR389W	YOR389W		YDR360W	YDR513W	YDR360W		YOL071W	YJL190C	YJL190C
YML047W-A	YOR186C-A	YML047W-A		YDR492W	YDR447C	YDR492W		YHR132W-A	YDR079W	YHR132W-A		YJR067C	YPR143W	YJR067C						YCR010C	YKL083W			YLR169W	YPR159W	YPR159W		YMR069W	YOR304C-A	YMR069W		YMR174C	YLR021W	YLR021W
YBL049W	YDR399W	YBL049W		YMR119W-A	YER026C	YMR119W-A		YGL030W	YBR089C-A	YGL030W		YDL181W	YFR003C	YDL181W						YNL014W	YNL174W			YDR363W-A	YER043C	YER043C		YKL102C	YML036W	YKL102C		YKR075C	YMR174C	YMR174C
YPL200W	YPR016W-A	YPL200W		YDR302W	YPR010C-A	YDR302W		YJR067C	YPR002C-A	YJR067C		YDR540C	YOR182C	YDR540C						YNL335W	YBL001C			YOR198C	YDR242W	YDR242W		YJL079C	YDL181W	YJL079C		YPR151C	YDL099W	YDL099W
YNL044W	YCR018C	YNL044W		YJL004C	YNL044W	YJL004C		YDR008C	YGL080W	YDR008C		YGR280C	YLR175W	YGR280C						YNL117W	YKR040C			YGR066C	YCL025C	YCL025C		Q0060	YDL244W	Q0060		YOR304C-A	YPR151C	YPR151C
YDR005C	YCR097W	YDR005C		YIL060W	YDR302W	YIL060W		YAL069W	YLR444C	YAL069W		YPR010C-A	YGR115C	YPR010C-A						YJR095W	YMR194W			YDR521W	YER188C-A	YER188C-A		YIL165C	YBR084C-A	YIL165C		YGR025W	YNL081C	YNL081C
YGR182C	YOR234C	YGR182C		YCR097W	YOR309C	YCR097W		YNR024W	YIL002W-A	YNR024W		YIL161W	YML026C	YIL161W						YNL339C	YDR034W-B			YNL179C	YDL110C	YDL110C		YDR157W	YDL177C	YDR157W		YOL077W-A	YLR029C	YLR029C
YOR210W	YLR167W	YOR210W		YPR010C-A	YER009W	YPR010C-A		YGR063C	YML062C	YGR063C		YOR182C	YDL067C	YOR182C						YOR329W-A	YDR391C			YGL214W	YGR253C	YGR253C		YLR046C	YKL091C	YLR046C		YLR021W	YLR151C	YLR151C
YBR013C	YDR210W	YBR013C		YPL034W	YHR054C	YPL034W		YPL271W	YAL059W	YPL271W		YJR079W	YGR183C	YJR079W						YPL200W	YJL202C			YKR083C	YGL226W	YGL226W		YIL003W	YKL137W	YIL003W		YBL059C-A	YHR039C-A	YHR039C-A
YLR104W	YDL009C	YLR104W		YHR095W	YMR256C	YHR095W		YEL012W	YER050C	YEL012W		YLR038C	YOR293W	YLR038C						YGR032W	YDL062W			YDL002C	YJR087W	YJR087W		YIL039W	YKL076C	YIL039W		YJL190C	YDL002C	YDL002C
YMR260C	YBR093C	YMR260C		YOL159C	YBR024W	YOL159C		YDR002W	YMR311C	YDR002W		YJR099W	YPL170W	YJR099W						YHR032C-A	YML090W			YFR008W	YOR331C	YOR331C		YIL029W-A	YDL068W	YIL029W-A		YDL099W	YHR059W	YHR059W
YDR399W	YLR388W	YDR399W		YPR134W	YJL004C	YPR134W		YPR002C-A	YGL030W	YPR002C-A		YML026C	YOR194C	YML026C						YLR307C-A	YPL186C			YML090W	YDL041W	YDL041W		YIL108W	YGL189C	YIL108W		YMR323W	YGL041C-B	YGL041C-B
YDL212W	YGR024C	YDL212W		YMR260C	YBR085C-A	YMR260C		YLR038C	YDR008C	YLR038C		YPR143W	YHR180W-A	YPR143W						YPL036W	YDR158W			YHR059W	YDL121C	YDL121C		YHL012W	YLR466C-A	YHL012W		YBR089W	YOR198C	YOR198C
YGR271C-A	YOR159C	YGR271C-A		YIR030W-A	YPR134W	YIR030W-A		YBR062C	YGR105W	YBR062C		YPL186C	YGR228W	YPL186C						YHR126C	YLR235C			YLR068W	YNL081C	YNL081C		YIL047C	YLR467C-A	YIL047C		YLR151C	YCR020W-B	YCR020W-B
YOR293W	YDR005C	YOR293W		YHL011C	YIL060W	YHL011C		YGR105W	YHR132W-A	YGR105W		YOL165C	YPR010C-A	YOL165C						YER023C-A				YPR102C	YAL003W	YAL003W		YKL044W	YOR396C-A	YKL044W		YNL081C	YMR323W	YMR323W
YML001W	YBR058C-A	YML001W		YLR252W	YJR086W	YLR252W		YNL228W	YEL012W	YNL228W		YDR051C	YOR277C	YDR051C						YHR054C				YHR007C-A	YOR281C	YOR281C		YDL016C	YBR278W	YDL016C		YLR029C	YDR119W-A	YDR119W-A
YAL063C-A	YLR036C	YAL063C-A		YKL021C	YIL027C	YKL021C		YIL002W-A	YJR023C	YIL002W-A		YLR421C	YDR342C	YLR421C						YOR139C				YMR118C	YMR139W	YMR139W		YOR072W	YBR194W	YOR072W		YHR039C-A	YGR259C	YGR259C
YFL032W	YDR163W	YFL032W		YDR447C	YKR039W	YDR447C		YMR311C	YML024W	YMR311C		YJL032W	YOR094W	YJL032W						YOL150C				YDL005C	YLR119W	YLR119W		YPR197C	YAL030W	YPR197C		YHR059W	YGL188C-A	YGL188C-A
YOR159C	YMR035W	YOR159C		YHL034W-A	YER099C	YHL034W-A		YML024W	YPR143W	YML024W		YLR175W	YNR034W-A	YLR175W						YER189W				YKL193C	YPR131C	YPR131C		YDL217C	YOL108C	YDL217C		YGR236C	YGR236C	YGR236C
YDR302W	YEL039C	YDR302W		YMR007W	YDR410C	YMR007W		YER002W	YNR024W	YER002W		YDL200C	YDR051C	YDL200C						YOR161W-B				YOL099C	YOL099C	YOL099C		YPL200W	YKL013C	YPL200W		YDL002C	YFL013W-A	YFL013W-A
YGR024C	YEL017C-A	YGR024C		YEL014C	YLR051C	YEL014C		YKL136W	YLR038C	YKL136W		YDR201W	YLR038C	YDR201W						YLR280C				YOR218C	YOR218C	YOR218C		Q0065	YML009C	Q0065		YOR198C	YGR085C	YGR085C
YGL168W	YPL197C	YGL168W		YER012W	YKL021C	YER012W		YDR320C-A	YLR285C-A	YDR320C-A		YMR284W	YDL200C	YMR284W						YKL223W				YMR139W	YGR018C	YGR018C		YBR134W	YER019C-A	YBR134W		YGL188C-A	YBL028C	YBL028C
YER053C-A	YGL091C	YER053C-A		YHR089C	YLR008C	YHR089C		YMR107W	YJR067C	YMR107W		YDL092W	YGR118W	YDL092W						YER085C				YLR119W	YOL052C-A	YOL052C-A		YER152W-A	YLR395C	YER152W-A		YDR119W-A	YNR050C	YNR050C
YOR234C	YOR182C	YOR234C		YEL072W	YHL012W	YEL072W		YAL059W	YBR196C-A	YAL059W		YLR423C	YCR082W	YLR423C						YLL067C				YGR018C	YKL193C	YKL193C		YLR342W-A	YOR020W-A	YLR342W-A		YGL041C-B	YDR246W-A	YDR246W-A
YLR078C	YGR182C	YLR078C		YIL027C	YER012W	YIL027C		YDL092W	YBR062C	YDL092W		YOR293W	YJR067C	YOR293W						YDR464C-A				YPR131C	YDL005C	YDL005C		YBR178W	YBR220C	YBR178W		YCR020W-B	YMR324C	YMR324C
YIL029C	YDR302W	YIL029C		YMR065W	YPL095C	YMR065W		YLR076C	YDR016C	YLR076C		YLR361C-A	YDL181W	YLR361C-A						YLR462W				YOR281C	YMR118C	YMR118C		Q0075	YBR063C	Q0075		YFL013W-A	YOL054W	YOL054W
YGR075C	YLR441C	YGR075C		YKR039W	YDR492W	YKR039W		YER050C	YER002W	YER050C		YNR034W-A	YDR540C	YNR034W-A						YFL066C				YOL052C-A	YPR102C	YPR102C		YLR462W	YER044C-A	YLR462W		YGR259C	YHR001W-A	YHR001W-A
YOR167C	YCR096C	YOR167C		YKL219W	YHL011C	YKL219W		YGL230C	YGR063C	YGL230C		YML098W	YMR284W	YML098W						YLR062C				YDL121C	YHR007C-A	YHR007C-A		YIR040C	YMR238W	YIR040C		YMR324C	YBR058C-A	YBR058C-A
YGR131W	YDL166C	YGR131W		YGL168W	YGR075C	YGL168W		YKL009W	YDR320C-A	YKL009W		YDR512C	YIL139C	YDR512C						YLR061W				YAL003W	YHR059W	YHR059W		YNL203C	YJL156W-A	YNL203C		YGR085C	YDR201W	YDR201W
YLR388W	YBL049W	YLR388W		YEL017C-A	YPL034W	YEL017C-A		YBL036C	YKL009W	YBL036C		YDR513W	YPR102C	YDR513W										YNL081C	YLR068W	YLR068W		YDL034W	YLR236C	YDL034W		YDR246W-A	YAL003W	YAL003W
YJL004C	YOR167C	YJL004C		YOR309C	YMR119W-A	YOR309C		YJR023C	YLR076C	YJR023C		YKL066W	YJL032W	YKL066W										YGL226W	YML090W	YML090W		Q0160	YOR291W	Q0160		YOL054W	YMR269W	YMR269W
YLR167W	YAL063C-A	YLR167W		YBR085C-A	YCR028C-A	YBR085C-A		YER142C	YBL036C	YER142C		YMR040W	YLR421C	YMR040W										YOR331C	YFR008W	YFR008W		YGR139W	YLR379W	YGR139W		YHR001W-A	YGL029W	YGL029W
YOR257W	YPL052W	YOR257W		YER186C	YHR089C	YER186C		YDR327W	YER053C-A	YDR327W		YLL047W	YIL161W	YLL047W										YJR087W	YGL214W	YGL214W		YJL015C	YPL272C	YJL015C		YBL028C	YLR102C	YLR102C
YLR460C	YPL200W	YLR460C		YDR079W	YOL159C	YDR079W		YGL231C	YNL150W	YGL231C		YGR118W	YOR052C	YGR118W										YER188C-A	YDL002C	YDL002C		YFL067W	YMR194C-A	YFL067W		YMR269W	YER066C-A	YER066C-A
YDR320C-A	YBR013C	YDR320C-A		YLR078C	YKR074W	YLR078C		YPR143W	YGL231C	YPR143W		YCR082W	YPL186C	YCR082W										YGR253C	YKR083C	YKR083C		YDR433W	YKR045C	YDR433W		YNR050C	YCL035C	YCL035C
YEL039C	YER117W	YEL039C		YIL003W	YDR079W	YIL003W		YPR142C	YPR142C	YPR142C		YPR102C	YDR201W	YPR102C										YDL041W	YGR066C	YGR066C		YIL012W	YBL073W	YIL012W		YER066C-A	YDR067C	YDR067C
YDR058C	YJL004C	YDR058C		YOR298W	YEL072W	YOR298W		YOR257W	YNL147W	YOR257W		YER002W	YKR083C	YER002W										YDL110C	YDR521W	YDR521W		YNL205C	YCR025C	YNL205C		YAL003W	YGR043C	YGR043C
YKL021C	YJL127C-B	YKL021C		YNL141W	YMR007W	YNL141W		YCR024C-B	YKR074W	YCR024C-B		YOR277C	YDL092W	YOR277C										YCL025C	YLR169W	YLR169W		YOR300W	YDR215C	YOR300W		YGR043C	YIR024C	YIR024C
YOL160W	YML001W	YOL160W		YER002W	YDR426C	YER002W		YGL041W-A	YGL041W-A	YGL041W-A		YDL099W	YER002W	YDL099W										YDL217C	YNL179C	YNL179C		YHR032W-A	YDR360W	YHR032W-A		YDR201W	YGL214W	YGL214W
YDL166C	YDR320C-A	YDL166C		YBR093C	YHR095W	YBR093C		YIL111W	YNL110C	YIL111W		YOR159C	YMR158C-A	YOR159C										YDR242W	YOR198C	YOR198C		YHR165W-A	YPL278C	YHR165W-A		YBR058C-A	YLR438C-A	YLR438C-A
YJL055W	YKL021C	YJL055W		YCR028C-A	YLR010C	YCR028C-A		YLR010C	YPL271W	YLR010C		YOL160W	YDR167W	YOL160W										YEL020W-A	YDR363W-A	YDR363W-A		YPL119C-A	Q0060	YPL119C-A		YLR102C	YLR325C	YLR325C
YCR097W	YML108W	YCR097W		YLR051C	YEL050W-A	YLR051C		YKR074W	YDL092W	YKR074W		YOR052C	YKL066W	YOR052C										YPR153W	YPR148C	YPR148C		YOR139C	YAR060C	YOR139C		YGL029W	YGR114C	YGR114C
YLR198C	YAL037C-B	YLR198C		YER187W	YER002W	YER187W		YLR460C	YCR018C-A	YLR460C		YGR228W	YOR159C	YGR228W										YER043C	YML064C	YML064C		Q0182	YHR212C	Q0182		YIR024C	YLR395C	YLR395C
YDR163W	YGR131W	YDR163W		YKL169C	YER050C	YKL169C		YNL147W	YLR010C	YNL147W		YOR121C	YBL026W	YOR121C										YOR389W	YHR060W	YHR060W		YER014C-A	YDR157W	YER014C-A		YCL035C	YDL121C	YDL121C
YLR441C	YBL062W	YLR441C		YLR010C	YHL034W-A	YLR010C		YPL121C	YNL228W	YPL121C		YEL012W	YLR423C	YEL012W										YPR159W	YMR194W	YMR194W		YEL075C	YIL165C	YEL075C		YGL214W	YPR148C	YPR148C
YAL037C-B	YLR104W	YAL037C-B		YKL001C	YEL014C	YKL001C		YOR094W	YIL111W	YOR094W		YKR083C	YDL099W	YKR083C										YGR138C	YMR315W	YMR315W		YEL075W-A	YMR069W	YEL075W-A		YGR226C	YOR114W	YOR114W
YBR004C	YOR011W-A	YBR004C		YOR103C	YLR252W	YOR103C		YLR294C	YPL121C	YLR294C		YDR167W	YOR121C	YDR167W										YER070W	YLR181C	YLR181C		YPR076W	YJL079C	YPR076W		YLR325C	YOR234C	YOR234C
YML108W	YHR121W	YML108W		YKR074W	YGR034W	YKR074W		YGL031C	YGL230C	YGL031C		YOR006C	YLR361C-A	YOR006C										Q0255	YOR041C	YOR041C		YDR053W	YIL039W	YDR053W		YDR067C	YBR201W	YBR201W
YDR327W	YPR002C-A	YDR327W		YIL139C	YDR031W	YIL139C		YLR456W	YER142C	YLR456W		YOR148C	YEL012W	YOR148C										YEL063C	YMR169C	YMR169C		YPR160C-A	YIL003W	YPR160C-A		YLR438C-A	YDL068W	YDL068W
YOR182C	YLR078C	YOR182C		YHR054C	YIR030W-A	YHR054C		YNL150W	YAL069W	YNL150W		YIR024C	YLL047W	YIR024C										YKL004W	YBR269C	YBR269C		YHL046C	YIL108W	YHL046C		YGR114C	YOR020W-A	YOR020W-A
YJL127C-B	YER050C	YJL127C-B		YGR034W	YMR107W	YGR034W		YHR219W	YKL136W	YHR219W		YLR406C	YJR099W	YLR406C										YNL220W	YFR032C-B	YFR032C-B		YHR182C-A	YIL047C	YHR182C-A		YPR148C	YGR226C	YGR226C
YBR244W	YOL077W-A	YBR244W		YLR285C-A	YKL219W	YLR285C-A		YDR079C-A	YOL166C	YDR079C-A		YKL067W	YKR035C	YKL067W										YDR344C	YDR513W	YDR513W		YFL064C	YLR046C	YFL064C		YLR395C	YOR281C	YOR281C
YBL062W	YKL082C	YBL062W		YCR090C	YER126C	YCR090C		YPR134W	YGL031C	YPR134W		YDL115C	YMR040W	YDL115C										YOR348C	YBL028C	YBL028C		YHR069C-A	YHL012W	YHR069C-A		YDL121C	YKL162C	YKL162C
YKL082C	YOR257W	YKL082C		YGR057C	YGL168W	YGR057C		YLR361C-A	YLR456W	YLR361C-A		YDR079C-A	YDL136W	YDR079C-A										YGL226C-A	YBL059C-A	YBL059C-A		YFL034C-A	YKL102C	YFL034C-A		YOR114W	YJL191W	YJL191W
YBR058C-A	YGL168W	YBR058C-A		YDL009C	YBL036C	YDL009C		YER046W	YLR154W-C	YER046W		YFR036W-A	YBR085C-A	YFR036W-A										YLR400W	YOR304C-A	YOR304C-A		YLR464W	YIL029W-A			YBR201W	YOR174W	YOR174W
YML062C	YNL044W	YML062C		YKL053C-A	YER186C	YKL053C-A		YMR321C	YDR327W	YMR321C		YAL025C	YDR513W	YAL025C										YPR020W	YBR230C	YBR230C		YEL076C-A	YKL044W			YOR020W-A	YGL152C	YGL152C
YER117W	YFL032W	YER117W		YDL236W	YGR280C	YDL236W		YKL058W	YOL101C	YKL058W		YKR035C	YLR406C	YKR035C										YHL012W	YOR282W	YOR282W		YEL032C-A	YPR197C			YOR234C	YOR331C	YOR331C
YDR210W	YDR034C-A	YDR210W		YDR031W	YEL017C-A	YDR031W		YNL110C	YCR024C-B	YNL110C		YMR256C	YML098W	YMR256C										YNL130C-A	YBR090C	YBR090C		YBL111C	YDL217C			YDL068W	YDR025W	YDR025W
YHR121W	YJL055W	YHR121W		YNL171C	YLR198C	YNL171C		YBR201C-A	YMR230W	YBR201C-A		YER188C-A	YDR512C	YER188C-A										YKL198C	YKL162C	YKL162C		YCL069W	YDL016C			YKL162C	YIL063C	YIL063C
YOR298W	YOL101C	YOR298W		YPL142C	YNL141W	YPL142C		YFR052C-A	YPR134W	YFR052C-A		YGR034W	YOR006C	YGR034W										YAR020C	YKR075C	YKR075C		YPL114W	YOR072W			YOR281C	YLR025W	YLR025W
YHR191C	YDR058C	YHR191C		YBR210W	YDL009C	YBR210W		YLR154W-C	YOR020W-A	YLR154W-C		YCL048W	YAL025C	YCL048W										YLL056C	YDL062W	YDL062W		YOL166C	YPL200W			YDR025W	YDL177C	YDL177C
YLR306W	YLR169W	YLR306W		YER050C	YLR078C	YER050C		YDR513W	YLR222C-A	YDR513W		YMR150C	YDR199W	YMR150C										YHL049C	YLR185W	YLR185W		YMR321C	Q0065			YGL152C	YML101C	YML101C
YCR096C	YLR460C	YCR096C		YNR061C	YPL142C	YNR061C		YOL101C	YOR257W	YOL101C		YBL026W	YMR195W	YBL026W										YOR169C	YDR158W	YDR158W		YDR401W	YBR134W			YOR174W	YBR194W	YBR194W
YBR056W	YML062C	YBR056W		YBL036C	YMR065W	YBL036C		YDR196C	YKL058W	YDR196C		YHL015W	YER188C-A	YHL015W										YDR400W	YPR150W	YPR150W		YCL026C-A	YER152W-A			YOR331C	YLR275W	YLR275W
YGR037C	YIL029C	YGR037C		YBL011W	YBR093C	YBL011W		YHL034W-A	YOR094W	YHL034W-A		YPR062W	YHL015W	YPR062W										YLR377C	YKL097C	YKL097C		YPL036W	YLR342W-A			YJL191W	YDR460W	YDR460W
YBR262C	YBR056W	YBR262C		YDR075W	YER187W	YDR075W		YCR018C-A	YNL133C	YCR018C-A		YBR085C-A	YHR136C	YBR085C-A										Q0075	YMR323W	YMR323W		YPL184C	Q0075			YLR025W	YDL062W	YDL062W
YMR211W	YHR191C	YMR211W		YDL157C	YDR167W	YDL157C		YNL070W	YDR196C	YNL070W		YIL014C-A	YGR034W	YIL014C-A										YLR390W-A	YOL071W	YOL071W		YDR432W	YBR178W			YDL177C	YBR089C-A	YBR089C-A
YNL067W	YDR327W	YNL067W		YGL161C	YKL001C	YGL161C		YOR020W-A	YDL191W	YOR020W-A		YMR195W	YOL165C	YMR195W										YJR095W	YMR159C	YMR159C		YAL037C-B	YLR462W			YIL063C	YMR247W-A	YMR247W-A
YPR002C-A	YBR262C	YPR002C-A		YDR522C	YIL003W	YDR522C		YOR252W	YOR312C	YOR252W		YPL123C	YIR024C	YPL123C										YEL060C	YNL174W	YNL174W		YIR012W	YIR040C			YBR194W	YFL012W	YFL012W
YNL211C	YER053C-A	YNL211C		YER142C	YOR298W	YER142C		YOL108C	YER046W	YOL108C		YML055W	YDL115C	YML055W										YER061C	YDL204W	YDL204W		YPR012W	YNL203C			YML101C	YPL238C	YPL238C
YDR034C-A	YGR037C	YDR034C-A		YOR258W	YBL011W	YOR258W		YOL086W-A	YDR068W	YOL086W-A		YDL136W	YKL067W	YDL136W										YEL075C	YDL099W	YDL099W		YGR032W	YJL015C			YBR072W	YML098W	YML098W
YML022W	YNL067W	YML022W		YGR219W	YKL169C	YGR219W		YHR191C	YDR079C-A	YHR191C		YDR199W	YBL077W	YDR199W										YJR077C	YKL091C	YKL091C		YLR235C	Q0160			YDR460W	YBR072W	YBR072W
YPL273W	YDR196C	YPL273W		YMR157C	YPL146C	YMR157C		YOR312C	YHR010W	YOR312C		YOR312C	YOR312C	YOR312C										YPL111W	YDR162C	YDR162C		YPL062W	YDL034W			YDL062W	YLR388W	YLR388W
YOL101C	YOR312C	YOL101C		YKL082C	YCR090C	YKL082C		YJL007C	YPL237W	YJL007C		YLR284C	YCL048W	YLR284C										YPR128C	YBL048W	YBL048W		YGR199W	YGR139W			YLR275W	YLR167W	YLR167W
YER050C	YBR244W	YER050C		YER126C	YKL082C	YER126C		YDR063W	YLR294C	YDR063W		YGL214W	YNL150W	YGL214W										YHR069C-A	YHL030W-A	YHL030W-A		YGL217C	YFL067W			YFL012W	YMR114C	YMR114C
YOL077W-A	YBR004C	YOL077W-A		YBR062C	YLR285C-A	YBR062C		YER012W	YOR252W	YER012W		YOR167C	YOR148C	YOR167C										YER073W	YDL181W	YDL181W		YNR075W	YIL012W			YBR089C-A	YLR041W	YLR041W
YBR166C	YMR230W	YBR166C		YDR320C-A	YGR219W	YDR320C-A		YLR306W	YFR052C-A	YLR306W		YPL096W	YOR021C	YPL096W										YBR240C	YDR119W-A	YDR119W-A		YNL202W	YDR433W			YML098W	YLL041C	YLL041C
YOR103C	YPL273W	YOR103C		YOL086W-A	YER142C	YOL086W-A		YNL133C	YLR361C-A	YNL133C		YDL007W	YPL123C	YDL007W										YKL217W	YDR022C	YDR022C		YLR466W	YNL205C			YMR247W-A	YGR253C	YGR253C
YGR183C	YGR183C	YGR183C		YPR087W	YPR087W	YPR087W		YIL014C-A	YOL108C	YIL014C-A		YBL077W	YPR062W	YBL077W										YER060W-A	YJR159W	YJR159W		YJL195C	Q0182			YIL100W	YJR112W	YJR112W
YPL148C	YGR075C	YPL148C		YIL059C	YBR062C	YIL059C		YMR230W	YMR158C-A	YMR230W		YCL035C	YHR072W-A	YCL035C										YOL002C	YOR189W	YOR189W		YNL339C	YOR300W			YMR114C	YDR513W	YDR513W
YLR169W	YOL160W	YLR169W		YMR107W	YOR103C	YMR107W		YPL013C	YDR447C	YPL013C		YKR040C	YKL137W	YKR040C										YJL052W	YNL266W	YNL266W		YER023C-A	YER014C-A			YLL041C	YGL174W	YGL174W
YNL171C	YLR306W	YNL171C		YDR167W	YBR210W	YDR167W		YDL191W	YDR034C-A	YDL191W		YAL064W	YDR079C-A	YAL064W										YMR007W	YGL152C	YGL152C		YAR020C	YHR032W-A			YPL238C	YGR167W	YGR167W
YKR068C	YML022W	YKR068C		YLR147C	YIL139C	YLR147C		YPL237W	YDR167W	YPL237W		YCL058C	YMR256C	YCL058C										YGL156W	YLL037W	YLL037W		YIL105W-A	YEL075C			YLR388W	YKL018C-A	YKL018C-A
YKL001C	YNL211C	YKL001C		YGR141W	YDR320C-A	YGR141W		YDR068W	YHR219W	YDR068W		YGL031C	YFR036W-A	YGL031C										Q0065	YLR458W	YLR458W		YER085C	YHR165W-A			YLR167W	YMR315W	YMR315W
YLR285C-A	YGL262W	YLR285C-A		YKR088C	YDL137W	YKR088C		YLR444C	YLR460C	YLR444C		YOR021C	YIL127C	YOR021C										YER005W	YER030W	YER030W		YHR032C-A	YPR076W			YDR513W	YER121W	YER121W
YDR196C	YMR211W	YDR196C		YJL055W	YGR057C	YJL055W		YKL053C-A	YKL097C	YKL053C-A		YPR098C	YGL031C	YPR098C										Q0130	YOR073W-A	YOR073W-A		YLL067C	YDR053W			YGR253C	YIL100W	YIL100W
YER186C	YLR264C-A	YER186C		YGL044C	YDR196C	YGL044C		YDR373W	YER133W	YDR373W		YJR157W	YGR135W	YJR157W										YLR154W-B	YHL031C	YHL031C		YDR464C-A	YPL119C-A			YLR041W	YBR029C	YBR029C
YDR319C	YDL050C	YDR319C		YKL174C	YOR258W	YKL174C		YLR421C	YDR328C	YLR421C		YHR136C	YIL014C-A	YHR136C										YAL054C	YOR028C	YOR028C		YFL066C	YPR160C-A			YPL250W-A	YER069W	YER069W
YJL104W	YDR031W	YJL104W		YGL159W	YDL157C	YGL159W		YAL064W	YER012W	YAL064W		YBR089C-A	YCL035C	YBR089C-A										YEL035C	YLR273C	YLR273C			YOR139C			YKL018C-A	YNR017W	YNR017W
YBR076W	YNL162W	YBR076W		YDR196C	YNR061C	YDR196C		YHR010W	YOL086W-A	YHR010W		YHR072W-A	YOR167C	YHR072W-A										YEL032W	YOR135C	YOR135C			YHL046C			YER121W	YGR199W	YGR199W
YLL055W	YKL009W	YLL055W		YCR001W	YLR154W-B	YCR001W		YDR276C	YDR513W	YDR276C		YNL170W	YBR290W	YNL170W										YER017C	YFR033C	YFR033C			YHR182C-A			YJR112W	YLR227C	YLR227C
YER099C	YJL104W	YER099C		YBR096W	YIL008W	YBR096W		YDR167W	YJR011C	YDR167W		YGR135W	YML055W	YGR135W										YCR010C	YCL022C	YCL022C			YFL064C			YMR315W	YDL037C	YDL037C
YBR201C-A	YDR328C	YBR201C-A		YGR280C	YGL044C	YGR280C		YOR276W	YDR278C	YOR276W		YOR186C-A	YNL110C	YOR186C-A										Q0050	YKL036C	YKL036C			YHR069C-A			YGL174W	YBL073W	YBL073W
YDL050C	YKR074W	YDL050C		YDL137W	YKL053C-A	YDL137W		YPR130C	YHR191C	YPR130C		YOL166C	YMR077C	YOL166C										YBL015W	YJL184W	YJL184W			YEL075W-A			YGR167W	YKR024C	YKR024C
YKL169C	YGR008C	YKL169C		YOR257W	YHR121W	YOR257W		YJR011C	YKL196C	YJR011C		YKL117W	YMR150C	YKL117W										YDR481C	YHR185C	YHR185C			YFL034C-A			YER060W	YJL158C	YJL158C
YDL007W	YDR274C	YDL007W		YHR007C-A	YLR147C	YHR007C-A		YDR447C	YDR373W	YDR447C		YHR132W-A	YDL007W	YHR132W-A										YGL126W	YDR512C	YDR512C						YOR011W	YOR360C	YOR360C
YOR312C	YGR105W	YOR312C		YIL110W	YDR075W	YIL110W		YPR170W-B	YLR287C-A	YPR170W-B		YOR102W	YCL058C	YOR102W										YAL053W	YKL117W	YKL117W						YER148W	YPR116W	YPR116W
YNL336W	YOR298W	YNL336W		YJL142C	YDL236W	YJL142C		YKL041W	YOR276W	YKL041W		YNL150W	YAL059W	YNL150W										YKR097W	YKL118W	YKL118W						YBR069C	YCL009C	YCL009C
YPL170W	YKL001C	YPL170W		YDR426C	YOL086W-A	YDR426C		YLL047W	YLR175W	YLL047W		YMR077C	YFR004W	YMR077C										YPR202W	YHR039C-A	YHR039C-A						YEL049W	YER060W-A	YER060W-A
YNL162W	YMR039C	YNL162W		YNL336W	YPR016W-A	YNL336W		YDR034C-A	YBR201C-A	YDR034C-A		YLR294C	YPL096W	YLR294C										YDL210W	YFL058W	YFL058W						YMR187C	YML034C-A	YML034C-A
YKL009W	YKR057W	YKL009W		YLR198C	YMR157C	YLR198C		YKL160W	YIL014C-A	YKL160W		YKL137W	YBR089C-A	YKL137W										YKL102C	YKR040C	YKR040C						YMR008C	YPR071W	YPR071W
YDR031W	YGL220W	YDR031W		YMR130W	YGR169C-A	YMR130W		YNL143C	YNL070W	YNL143C		YOR252W	YOR252W	YOR252W										YNL024C	YPR108W-A	YPR108W-A						YEL071W	YIL029W-A	YIL029W-A
YGR232W	YLR285C-A	YGR232W		YHR181W	YGL161C	YHR181W		YER133W	YCR028C-A	YER133W		YIL127C	YLR284C	YIL127C										YIL160C	YJR115W	YJR115W						YNL066W	YBR244W	YBR244W
YMR256C	YOR052C	YMR256C		YML062C	YNL171C	YML062C		YCR028C-A	YDL240C-A	YCR028C-A		YFR010W-A	YJR023C	YFR010W-A										YER081W	YCR083W	YCR083W						YBR032W	YER081W	YER081W
YGR105W	YDL007W	YGR105W		YLR154W-B	YFR052C-A	YLR154W-B		YOR159C	YDR276C	YOR159C		YLR145W	YLR200W	YLR145W										YGL217C	YJR034W	YJR034W						YGL126W	YLR343W	YLR343W
YHR021C	YKR068C	YHR021C		YFL028C	YKL174C	YFL028C		YDR336W	YLR421C	YDR336W		YMR294W	YOL160W	YMR294W										YEL046C	YGL158W	YGL158W						YOR169C	YNL028W	YNL028W
YKL041W	YIL027C	YKL041W		YFR052C-A	YGL159W	YFR052C-A		YDR378C	YDR336W	YDR378C		YFR004W	YHR132W-A	YFR004W										YOR153W	YGL041C-B	YGL041C-B						YPL272C	YHR029C	YHR029C
YEL075C	YHR021C	YEL075C		YJR024C	YJL055W	YJR024C		YKL196C	YJL007C	YKL196C		YBR290W	YLR221C	YBR290W										YJL169W	YJR037W	YJR037W						YBR235W	YOR153W	YOR153W
YMR230W	YBR166C	YMR230W		YPL146C	YGR141W	YPL146C		YDL200C	YDL200C	YDL200C		YGR222W	YNL114C	YGR222W										YNR041C	YDR500C	YDR500C						YBL073W	YEL029C	YEL029C
YDR274C	YPL148C	YDR274C		YPR113W	YDL166C	YPR113W		YLR221C	YOR261C	YLR221C		YDR473C	YKL009W	YDR473C										YNL044W	YDR114C	YDR114C						YOL125W	YOR034C	YOR034C
YGL161C	YOR103C	YGL161C		YHR121W	YGR103W	YHR121W		YBR164C	YOR159C	YBR164C		YIL068W-A	YKL117W	YIL068W-A										YNL202W	YJR156C	YJR156C						YNL028W	YGR138C	YGR138C
YPL095C	YPL170W	YPL095C		YLR146W-A	YKL202W	YLR146W-A		YDR328C	YLR221C	YDR328C		YLR025W	YDR079W	YLR025W										YIL108W	YBL001C	YBL001C						YGR199W	YOR105W	YOR105W
YKR074W	YER099C	YKR074W		YDL007W	YML062C	YDL007W		YPR094W	YKL160W	YPR094W		YNL143C	YDL121C	YNL143C										YJL156W-A	YIL142C-A	YIL142C-A						YMR305C	YJR077C	YJR077C
YKR057W	YLR154C-G	YKR057W		YBL049W	YIL059C	YBL049W		YBL109W	YLL047W	YBL109W		YLR221C	YKL056C	YLR221C										YDR433W	YFL014W	YFL014W						YIL029W-A	YDR481C	YDR481C
YLR038C	YOR309C	YLR038C		YDL152W	YLR175W	YDL152W		YLR287C-A	YDR063W	YLR287C-A		YDL002C	YIL138C	YDL002C										YIL047C	YLR282C	YLR282C						YML034C-A	YJL222W-B	YJL222W-B
YGL220W	YEL075C	YGL220W		YPL002C	YOR257W	YPL002C		YDL069C	YBR164C	YDL069C		YDR079W	YGR020C	YDR079W										YLR120C	YPR142C	YPR142C						YER060W-A	YDR344C	YDR344C
YIL027C	YLR038C	YIL027C		YGR103W	YLR146W-A	YGR103W		YFR004W	YPL013C	YFR004W		YPL035C	YOR123C	YPL035C										YBR295W	YJR118C	YJR118C						YNR017W	YNL235C	YNL235C
YNL100W	YKL169C	YNL100W		YNL043C	YFR004W	YNL043C		YGR024C	YHL034W-A	YGR024C		YGL080W	YPR098C	YGL080W										YBR093C	YLR200W	YLR200W						YLR227C	Q0110	Q0110
YDR328C	YDR319C	YDR328C		YLR363W-A	YOL106W	YLR363W-A		YPL117C	YER117W	YPL117C		YOR123C	YGR129W	YOR123C										YER056C	YNL180C	YNL180C						YDL037C	YER152C	YER152C
YOL162W	YMR256C	YOL162W		YDL166C	YDR522C	YDL166C		YBR196C-A	YFR004W	YBR196C-A		YBR201C-A	YLR145W	YBR201C-A										YIR032C	YKL122C	YKL122C						YER069W	YKR041W	YKR041W
YGL255W	YGL102C	YGL255W		YHR043C	YIL110W	YHR043C		YJL049W	YDR378C	YJL049W		YER053C-A	YDL191W	YER053C-A										YER144C	YGR025W	YGR025W						YBR029C	YER026C	YER026C
YPR109W	YBR076W	YPR109W		YCR039C	YCR001W	YCR039C		YOR261C	YIL098C	YOR261C		YKL009W	YLR325C	YKL009W										YOR306C	YDL096C	YDL096C						YPR116W	YJL130C	YJL130C
YMR039C	YHR010W	YMR039C		YCL067C	YCL067C	YCL067C		YCR102C	YER159C	YCR102C		YDL121C	YKL156W	YDL121C										YBR005W	YPR151C	YPR151C						YBR244W	YOL058W	YOL058W
YGR008C	YML024W	YGR008C		YBR004C	YCR039C	YBR004C		YER044C	YGR024C	YER044C		YNL110C	YLR456W	YNL110C										YLR342W-A	YPL124W	YPL124W						YOR360C	YER083C	YER083C
YOR052C	YER186C	YOR052C		YIL008W	YNL043C	YIL008W		YOL014W	YBR290W	YOL014W		YLR456W	YOR102W	YLR456W										YER152C	YFR032C-A	YFR032C-A						YCL009C	YBR295W	YBR295W
YNL052W	YKL172W	YNL052W		YGR101W	YOR376W-A	YGR101W		YER159C	YLR306W	YER159C		YLR200W	YOR186C-A	YLR200W										YMR034C	YBL031W	YBL031W						YHR029C	YMR306W	YMR306W
YLR264C-A	YML063W	YLR264C-A		YLR050C	YDL007W	YLR050C		YHR181W	YPR130C	YHR181W		YBR164C	YGL080W	YBR164C										YBR291C	YMR269W	YMR269W						YKR041W	YKL219W	YKL219W
YER012W	YNL171C	YER012W		YOR310C	YKL068W-A	YOR310C		YIL098C	YPL117C	YIL098C		YAL059W	YDR002W	YAL059W										Q0060	YMR247W-A	YMR247W-A						YPR071W	YIR030W-A	YIR030W-A
YBL011W	YPL146C	YBL011W		YGR131W	YHR181W	YGR131W		YPL142C	YGR135W	YPL142C		YFL046W	YKR040C	YFL046W										YEL042W	YPL186C	YPL186C						YJR077C	YJL101C	YJL101C
YNR062C	YDR051C	YNR062C		YGR169C-A	YFL028C	YGR169C-A		YLR175W	YDR471W	YLR175W		YJL199C	YBR164C	YJL199C										YMR230W-A	YPL185W	YPL185W						YLR343W	YPL017C	YPL017C
YGR025W	YNL336W	YGR025W		YPL266W	YBR056W	YPL266W		YLR222C-A	YGR020C	YLR222C-A		YHR021C	YGL214W	YHR021C										YBR134W	YFL015W-A	YFL015W-A						YKR024C	YNL112W	YNL112W
YGR259C	YBR201C-A	YGR259C		YJR010C-A	YPR130C	YJR010C-A		YBR262C	YKL041W	YBR262C		YGR020C	YMR294W	YGR020C										YLR121C	YGR228W	YGR228W						YOL013W-B	YAL053W	YAL053W
YIL150C	YBR233W-A	YIL150C		YHR140W	YPL266W	YHR140W		YER117W	YPL142C	YER117W		YJR023C	YKL196C	YJR023C										YPL058C	YFR010W-A	YFR010W-A						YJL158C	YOR225W	YOR225W
YER038W-A	YLR010C	YER038W-A		YFR004W	YKR088C	YFR004W		YDR278C	YJL049W	YDR278C		YBR181C	YLR294C	YBR181C										YHL016C	YBR285W	YBR285W						YER081W	YER052C	YER052C
YDL071C	YKL041W	YDL071C		YBR056W	YPL002C	YBR056W		YCL048W	YNL143C	YCL048W		YGL158W	YDL002C	YGL158W										YIL165C	YGL061C	YGL061C						YOR034C	YAR060C	YAR060C
YJL083W	YDL137W	YJL083W		YOR366W	YDL050C	YOR366W		YHR001W-A	YDL079C	YHR001W-A		YKL156W	YLR025W	YKL156W										YHR130C	YIR019C	YIR019C						YOR153W	YHR212C	YHR212C
YBR232C	YKL033W-A	YBR232C		YBR154C	YDR288W	YBR154C		YGR135W	YDR426C	YGR135W		YMR251W-A	YNL170W	YMR251W-A										YLR157W-D	YAL055W	YAL055W						YGR138C	YDR242W	YDR242W
YER068C-A	YLL055W	YER068C-A		YDL050C	YJR024C	YDL050C		YBR268W	YEL003W	YBR268W		YDL152W	YOR210W	YDL152W										YMR084W	YML030W	YML030W						YDR344C	YKL078W	YKL078W
YJL067W	YBL011W	YJL067W		YDR288W	YBR096W	YDR288W		YLR290C	YCL048W	YLR290C		YOL162W	YMR251W-A	YOL162W										YMR035W	YDL130W-A	YDL130W-A						YEL029C	YDR537C	YDR537C
YHR116W	YER012W	YHR116W		YPR130C	YBR154C	YPR130C		YML055W	YKR035C	YML055W		YGR129W	YPR059C	YGR129W										YGL055W	YHL045W	YHL045W						YOR105W	YBR063C	YBR063C
YLL032C	YFL011W	YLL032C		YLR443W	YGL102C	YLR443W		YLR406C	YNL114C	YLR406C		YMR158C-A	YHR021C	YMR158C-A										YOR298W	YAR075W	YAR075W						YNL235C	YLR120C	YLR120C
YJL076W	YER019C-A	YJL076W		YHR005C-A	YNL336W	YHR005C-A		YBR290W	YER112W	YBR290W		YJL218W	YAL064W	YJL218W										YKL163W	YDR063W	YDR063W						YHR212C	YDR360W	YDR360W
YDR246W	YNL100W	YDR246W		YPR198W	YER133W	YPR198W		YDR471W	YLR406C	YDR471W		YOR210W	YPR012W	YOR210W										YMR303C	YNL114C	YNL114C						YAR060C	YDR523C	YDR523C
YHR087W	YIL002W-A	YHR087W		YGR046W	YLR154W-C	YGR046W		YGR020C	YBR268W	YGR020C		YDL191W	YDR473C	YDL191W										YHR182C-A	YJL026C-A	YJL026C-A						YER152C	YLR400W	YLR400W
YDR360W	YOL013W-B	YDR360W		YDR058C	YDR163W	YDR058C		YDR286C	YDL069C	YDR286C		YHR051W	YGL158W	YHR051W										YER065C	YNL079C	YNL079C						YDR481C	YER056C	YER056C
YOR073W	YER133W	YOR073W		YKR026C	YHR043C	YKR026C		YMR150C	YBR262C	YMR150C		YHR050W-A	YNL143C	YHR050W-A										YEL075W-A	YFR049W	YFR049W						Q0110	YPR202W	YPR202W
YKL147C	YGL161C	YKL147C		YKR051W	YGR105W	YKR051W		YGL020C	YMR077C	YGL020C		YKL196C	YBR181C	YKL196C										YBR056W-A	YGR204C-A	YGR204C-A						YOR225W	YPL052W	YPL052W
YGL254W	YGR232W	YGL254W		YBR266C	YLR050C	YBR266C		YMR077C	YDL121C	YMR077C		YOL108C	YOR394C-A	YOL108C										YER091C	YOR216C	YOR216C						YLR412C-A	YGR032W	YGR032W
YOR132W	YER072W	YOR132W		YDR014W-A	YHR007C-A	YDR014W-A		YJL004C	YAL064W	YJL004C		YLR325C	YDR336W	YLR325C										YGL184C	YLL009C	YLL009C						YMR306W	YPL184C	YPL184C
YHR172W	YDR370C	YHR172W		YML027W	YGR131W	YML027W		YLL066W-B	YER044C	YLL066W-B		YIL138C	YOR036W	YIL138C										YBL042C	YHR050W-A	YHR050W-A						YOL058W	YDR432W	YDR432W
YLR385C	YPL095C	YLR385C		YEL030W	YDR328C	YEL030W		YDL079C	YKL053C-A	YDL079C		YDR336W	YGR222W	YDR336W										YNL192W	YOR215C	YOR215C						YER026C	YBL042C	YBL042C
YOR263C	YDR167W	YOR263C		YOR073W	YDR281C	YOR073W		YJR094W-A	YOR265W	YJR094W-A		YIL086C	YDL079C	YIL086C										YOR170W	YDL085C-A	YDL085C-A						YBR295W	YER113C	YER113C
YAR031W	YGL255W	YAR031W		YER038W-A	YCR082W	YER038W-A		YDL121C	YHR001W-A	YDL121C		YLR036C	YJL190C	YLR036C										YMR238W	YER038W-A	YER038W-A						YPL017C	YBR093C	YBR093C
YPL262W	YNL052W	YPL262W		YPL127C	YOR261C	YPL127C		YKL067W	YJR094W-A	YKL067W		YKL056C	YJR157W	YKL056C										YNL057W	YIL177W-A	YIL177W-A						YKL219W	YJL109C	YJL109C
YMR094W	YPL143W	YMR094W		YEL059W	YBR004C	YEL059W		YCR020C-A	YMR143W	YCR020C-A		YPR012W	YOL108C	YPR012W										YPR123C	YJL225W-A	YJL225W-A						YER083C	YER099C	YER099C
YDR214W	YGR101W	YDR214W		YDR146C	YPR113W	YDR146C		YKR035C	YLL066W-B	YKR035C		YNL114C	YER126C	YNL114C										YHR032W-A	YHR087W	YHR087W						YJL130C	YCR025C	YCR025C
YGL045W	YOR258W	YGL045W		YPL183W-A	YOR310C	YPL183W-A		YKR085C	YDR051C	YKR085C		YDR002W	YGR105W	YDR002W										YLR237W	YGR169C-A	YGR169C-A						YCR025C	YIL003W	YIL003W
YMR190C	YOL162W	YMR190C		YML064C	YGL231C	YML064C		YDL166C	YPR170W-B	YDL166C		YDR316W	YKR074W	YDR316W										YLL058W	YJR099W	YJR099W						YJL101C	YER187W	YER187W
YNR037C	YPL225W	YNR037C		YBR223C	YJL142C	YBR223C		YLR147C	YKR085C	YLR147C		YLL037W	YPL238C	YLL037W										YGR055W	YER121W	YER121W						YIR030W-A	YBR296C	YBR296C
YMR198W	YDR272W	YMR198W		YAL016C-A	YLR327C	YAL016C-A		YMR143W	YHR181W	YMR143W		YOR036W	YCR028C-A	YOR036W										YNL014W	YFR003C	YFR003C						YJL222W-B	YIL108W	YIL108W
YNL066W	YBR024W	YNL066W		YNL333W	YLR441C	YNL333W		YDR051C	YML055W	YDR051C		YOL164W-A	YOR289W	YOL164W-A										YEL073C	YDR070C	YDR070C						YER052C	YKR045C	YKR045C
YPL116W	YGL103W	YPL116W		YMR303C	YGR101W	YMR303C		YDR288W	YDL166C	YDR288W		YOR169C	YBR154C	YOR169C										Q0160	YLR198C	YLR198C						YDR242W	YKL044W	YKL044W
YOL136C	YIL161W	YOL136C		YMR190C	YMR130W	YMR190C		YFL032W	YML026C	YFL032W		YJR037W	YFL046W	YJR037W										YEL050W-A	YHR180W-A	YHR180W-A						YAL053W	Q0050	Q0050
YER070W	YGR035C	YER070W		YDR214W	YJL189W	YDR214W		YOL155W-A	YJL004C	YOL155W-A		YNL286W	YOR169C	YNL286W										YHL046W-A	YLR302C	YLR302C						YKL078W	YOL011W	YOL011W
YNL304W	YHR089C	YNL304W		YOR250C	YLR363W-A	YOR250C		YCR108C	YGL220W	YCR108C		YGR275W	YBR201C-A	YGR275W										YER184C	YDR543C	YDR543C						YLR120C	YIL039W	YIL039W
YLL018C-A	YGR103W	YLL018C-A		YGL024W	YBL049W	YGL024W		YJL199C	YBL062W	YJL199C		YOR289W	YIL068W-A	YOR289W										YDR215C	YBR027C	YBR027C						YBR063C	YIL165C	YIL165C
YNL310C	YBR302C	YNL310C		YMR120C	YGR161W-C	YMR120C		YOR265W	YDR288W	YOR265W		YBR154C	YGL041W-A	YBR154C										YLR466W	YGR115C	YGR115C						YDR360W	YBR046C	YBR046C
YLR086W	YML132W	YLR086W		YLR217W	YHR141C	YLR217W		YIL105W-A	YOL109W	YIL105W-A		YAL008W	YBL040C	YAL008W										YCL038C	YOR265W	YOR265W						YPR123C	YER009W	YER009W
YER028C	YGR280C	YER028C		YLR234W	YDL152W	YLR234W		YER026C	YGR118W	YER026C		YPL238C	YMR263W	YPL238C										YER152W-A	YOR309C	YOR309C						YNL112W	YBR056C-B	YBR056C-B
YLR063W	YLR007W	YLR063W		YML037C	YDR210W	YML037C		YHR005C-A	YPL211W	YHR005C-A		YGR105W	YPL035C	YGR105W										YDR492W	YOR053W	YOR053W						YDR537C	YLR180W	YLR180W
YDR052C	YPR109W	YDR052C		YLR121C	YGR286C	YLR121C		YER112W	YOR036W	YER112W		YDL079C	YHR051W	YDL079C										YLR222C-A	YOR394C-A	YOR394C-A						YPL184C	YGL184C	YGL184C
YKL115C	YPL220W	YKL115C		YOR073W-A	YGR155W	YOR073W-A		YEL003W	YPR094W	YEL003W		YPL196W	YFR010W-A	YPL196W										YBR076W	YGR008C	YGR008C						YAL047W-A	YKL004W	YKL004W
YNR067C	YCR020C-A	YNR067C		YPL199C	YPL220W	YPL199C		YDL075W	YDL075W	YDL075W		YJL030W	YGR035C	YJL030W										YJL158C	YBL108C-A	YBL108C-A						YPL052W	YPR123C	YPR123C
YMR166C	YER066C-A	YMR166C		YGL043W	YHR005C-A	YGL043W		YOR148C	YER067W	YOR148C		YBL040C	YBR062C	YBL040C										YHR165W-A	YFL063W	YFL063W						YLR400W	YPR197C	YPR197C
YER153C	YMR244W	YER153C		YPL158C	YFL011W	YPL158C		YML098W	YGL020C	YML098W		YBR062C	YIL086C	YBR062C										YDR055W	YKL083W	YKL083W						YHL050W-A	YDR055W	YDR055W
YJL209W	YNL024C-A	YJL209W		YMR076C	YJL104W	YMR076C		YDR201W	YKL067W	YDR201W		YDL219W	YGR085C	YDL219W										YIR040C	YAL059C-A	YAL059C-A						YGR032W	YNL202W	YNL202W
YNL072W	YPL187W	YNL072W		YHR203C	YLR456W	YHR203C		YLL037W	YPL090C	YLL037W		YLR041W	YML024W	YLR041W										YBR220C	YBL053W	YBL053W						YPR202W	YPR128C	YPR128C
YMR076C	YPR188C	YMR076C		YGL075C	YDR058C	YGL075C		YNL114C	YLR290C	YNL114C		YGR131W	YLR036C	YGR131W										YMR305C	YHR219W	YHR219W						YER056C	YDR492W	YDR492W
YOR198C	YLR175W	YOR198C		YLR353W	YGL055W	YLR353W		YJL104W	YJR082C	YJL104W		YHR043C	YDR532C	YHR043C										YDR502C	YJR162C	YJR162C						YDR432W	YLL012W	YLL012W
YPL267W	YPL034W	YPL267W		YGL174W	YKR026C	YGL174W		YGL220W	YOL014W	YGL220W		YER142C	YDL219W	YER142C										YNL142W	YAL045C	YAL045C						YER113C	YMR034C	YMR034C
YMR078C	YDR068W	YMR078C		YGR204W	YPL225W	YGR204W		YOR036W	YLR147C	YOR036W		YNR020C	YER159C	YNR020C										YJL079C	YGL041C	YGL041C						YDR523C	YER144C	YER144C
YHL019W-A	YKL174C	YHL019W-A		YPL267W	YLR306W	YPL267W		YBL062W	YBL109W	YBL062W		YPL143W	YJL199C	YPL143W										YIL117C	YCL073C	YCL073C						YKL044W	YER017C	YER017C
YPR136C	YJR094W-A	YPR136C		YBR064W	YMR230W	YBR064W		YPL090C	YLR435W	YPL090C		YCR028C-A	YPL121C	YCR028C-A										YNR075W	YJR005C-A	YJR005C-A						YBL042C	YBR012C	YBR012C
YOL082W	YPR113W	YOL082W		YDL127W	YCR005C	YDL127W		YML132W	YNL079C	YML132W		YJL123C	YGR275W	YJL123C										YNL339C	YAL069W	YAL069W						YBR093C	YJL156W-A	YJL156W-A
YNL102W	YHL011C	YNL102W		YOR027W	YHR140W	YOR027W		YBR302C	YCR020C-A	YBR302C		YJL190C	YNL180C	YJL190C										Q0105	YNL017C	YNL017C						YER099C	YBR222C	YBR222C
YBL059W	YDR426C	YBL059W		YPL222W	YER158W-A	YPL222W		YML026C	YMR150C	YML026C		YLR306W	YDR316W	YLR306W										YNL117W	YGL188C	YGL188C						YIL003W	YIR032C	YIR032C
YOR331C	YDR288W	YOR331C		YGR203W	YKR051W	YGR203W		YGL204C	YBR233W-A	YGL204C		YDR008C	YDR471W	YDR008C										YJR073C	YFL015C	YFL015C						YJL109C	YLR046C	YLR046C
YDR521W	YPL139C	YDR521W		YPL141C	YPR002C-A	YPL141C		YBL078C	YGL041C	YBL078C		YAL055W	YNL149C	YAL055W										YDL034W	YDR544C	YDR544C						YBR046C	YHR148W	YHR148W
YBR083W	YPL266W	YBR083W		YLL018C-A	YOR366W	YLL018C-A		YOR327C	YER026C	YOR327C		YKR074W	YER142C	YKR074W										YIR030W-A	YCL076W	YCL076W						YIL108W	YDL094C	YDL094C
YPL016W	YGL123W	YPL016W		YPL250C	YPR187W	YPL250C		YBR167C	YDR201W	YBR167C		YMR263W	YLR010C	YMR263W										Q0055	YCR108C	YCR108C						YKR045C	YER043C	YER043C
YBR223C	YLR361C-A	YBR223C		YMR094W	YMR039C	YMR094W		YER188C-A	YBR302C	YER188C-A		YIL020C-A	YDR008C	YIL020C-A										Q0250	YDR278C	YDR278C						YIL165C	YEL063C	YEL063C
YMR117C	YDL136W	YMR117C		YER167W	YGR046W	YER167W		YOL109W	YML132W	YOL109W		YPR134W	YPL143W	YPR134W										YLR120W-A	YLR154W-E	YLR154W-E						YER187W	YBR092C	YBR092C
YBR060C	YPL119C-A	YBR060C		YER070W	YLR421C	YER070W		YGR118W	YJL104W	YGR118W		YGL041W-A	YNL286W	YGL041W-A										YJL171C	YNL338W	YNL338W						YOL011W	YER044C	YER044C
YFL012W-A	YCR082W	YFL012W-A		YBL002W	YNL070W	YBL002W		YDL007W	YBR253W	YDL007W		YPL121C	YOR193W	YPL121C										YHR139C	YJR140W-A	YJR140W-A						YBR296C	YDL016C	YDL016C
YGL153W	YPR187W	YGL153W		YLR052W	YKL172W	YLR052W		YPL211W	YIL105W-A	YPL211W		YDR532C	YGR131W	YDR532C										YOL106W	YKL202W	YKL202W						YIL039W	YEL032W	YEL032W
YLR282C	YDR366C	YLR282C		YLR086W	YBR104W	YLR086W		YBR233W-A	YGR030C	YBR233W-A		YGR085C	YNL122C	YGR085C										YJL153C	YBL109W	YBL109W						Q0050	YHL016C	YHL016C
YML091C	YKR026C	YML091C		YBR051W	YPR198W	YBR051W		YML022W	YDR199W	YML022W		YLR080W	YPR134W	YLR080W										YJL222W-B	YKL225W	YKL225W						YLR180W	YEL042W	YEL042W
YDL023C	YNL157W	YDL023C		YKL164C	YDR177W	YKL164C		YFR003C	YIL148W	YFR003C		YOR193W	YDL075W	YOR193W										YBR222C	YLL065W	YLL065W						YBR056C-B	YNL141W	YNL141W
YLR338W	YKL076C	YLR338W		YNL328C	YNL308C	YNL328C		YJR058C	YBR154C	YJR058C		YML024W	YJL030W	YML024W										YER014C-A	YLL066W-B	YLL066W-B						YPR197C	YDR215C	YDR215C
YDR143C	YER159C	YDR143C		YDL131W	YJR010C-A	YDL131W		YDR426C	YHR005C-A	YDR426C		YJL004C	YOL166C	YJL004C										Q0085	YKL224C	YKL224C						YER009W	YPL187W	YPL187W
YOR372C	YKR088C	YOR372C		YNL287W	YPL053C	YNL287W		YML030W	YCR003W	YML030W		YPR059C	YJL123C	YPR059C										YJL032W	YOL161C	YOL161C						YGL184C	YNL044W	YNL044W
YLL040C	YLR406C	YLL040C		YML109W	YLR443W	YML109W		YBR154C	YDL212W	YBR154C		YDL075W	YLL037W	YDL075W										YNL019C	YHR217C	YHR217C						YFL067W	Q0250	Q0250
YGL089C	YHL015W	YGL089C		YNL285W	YOL065C	YNL285W		YIL161W	YOR148C	YIL161W		YER126C	YDL152W	YER126C										YPL200W	YIL052C	YIL052C						YDR055W	YDR502C	YDR502C
YGR237C	YDR400W	YGR237C		YDL117W	YDR306C	YDL117W		YOR366W	YER188C-A	YOR366W		YER159C	YBL059C-A	YER159C										YOR329W-A	YBR266C	YBR266C						YPR128C	YNL024C	YNL024C
YDL040C	YHR005C-A	YDL040C		YDR052C	YEL073C	YDR052C		YER067W	YDR529C	YER067W		YGR286C	YCR016W	YGR286C										YLR307C-A	YLR154C-H	YLR154C-H						YKL004W	YMR069W	YMR069W
YPL259C	YGR046W	YPL259C		YNL198C	YMR230W-A	YNL198C		YMR059W	YGR280C	YMR059W		YBL078C	YHR043C	YBL078C										YLL055W	YLR156C-A	YLR156C-A						YNL202W	YIL047C	YIL047C
YDR158W	YPL090C	YDR158W		YDL085W	YOR118W	YDL085W		YNL079C	YBL059C-A	YNL079C		YLR395C	YOL162W	YLR395C										YHR032C-A	YLR157C-C	YLR157C-C						YDR492W	YDL210W	YDL210W
YFL039C	YEL072W	YFL039C		YAL003W	YDR051C	YAL003W		YIL148W	YDR286C	YIL148W		YDR494W	YOL164W-A	YDR494W										Q0275	YLR159C-A	YLR159C-A						YDL094C	YPR012W	YPR012W
YBR071W	YOR094W	YBR071W		YDR462W	YJR161C	YDR462W		YGR030C	YMR284W	YGR030C		YNL136W	YLR041W	YNL136W										YKR039W	YIL177C	YIL177C						YJL156W-A	YMR238W	YMR238W
YOR025W	YOR252W	YOR025W		YOL040C	YLR169W	YOL040C		YLR435W	YOR327C	YLR435W		YNL149C	YAR069C	YNL149C										YBR208C	YLR466C-A	YLR466C-A						YMR034C	YNL210W	YNL210W
YBR158W	YBR085C-A	YBR158W		YMR078C	YJL199C	YMR078C		YGR035W-A	YBL078C	YGR035W-A		YLR010C	YHR214C-D	YLR010C										YNL205C	YLR467C-A	YLR467C-A						YER144C	YJR073C	YJR073C
YGR152C	YDR378C	YGR152C		YGR146C	YKR052C	YGR146C		YMR284W	YDR381C-A	YMR284W		YDR471W	YJL004C	YDR471W										YGR032W	YOR396C-A	YOR396C-A						YLL012W	YBR076W	YBR076W
YNL236W	YGR057C	YNL236W		YPR145W	YPL271W	YPR145W		YDR381C-A	YDL007W	YDR381C-A		YNL180C	YAL008W	YNL180C										YER023C-A	YNL235C							YLR046C	YPL111W	YPL111W
YGL043W	YLR421C	YGL043W		YNL304W	YLR301W	YNL304W		YJR082C	YJL011C	YJR082C		YOL096C	YDR494W	YOL096C										YEL020C	YEL017C-A							YBR012C	YMR007W	YMR007W
YJL078C	YNL009W	YJL078C		YPL116W	YLR367W	YPL116W		YOR215C	YPR102C	YOR215C		YBR258C	YDR373W	YBR258C										YLR142W	YJL015C							YDL016C	YDL217C	YDL217C
YDR422C	YGL044C	YDR422C		YCR068W	YPR071W	YCR068W		YBR253W	YOR215C	YBR253W		YDR373W	YPL196W	YDR373W										YBR296C	YNL210W							YER017C	YCL038C	YCL038C
YOR282W	YOL139C	YOR282W		YGL038C	YOR052C	YGL038C		YHR043C	YLR298C	YHR043C		YCR016W	YCR003W	YCR016W										Q0045	YGL170C							YIR032C	YER044C-A	YER044C-A
YMR163C	YGL170C	YMR163C		YDR143C	YBR058C-A	YDR143C		YCR003W	YKL033W-A	YCR003W		YBL059C-A	YGR103W	YBL059C-A										Q0297	YPL062W							YBR092C	YOR298W	YOR298W
YBR221C	YMR007W	YBR221C		YKR097W	YER148W	YKR097W		YPL099C	YOL106W	YPL099C		YPL185W	YNR020C	YPL185W										YHR125W	YMR306W							YHR148W	YER135C	YER135C
YGL183C	YER071C	YGL183C		YGL045W	YPR094W	YGL045W		YOR289W	YLL037W	YOR289W		YNL122C	YGR286C	YNL122C										YPL187W	YER099C							YER044C	YGR055W	YGR055W
YBL032W	YMR263W	YBL032W		YMR001C	YOR094W	YMR001C		YOR258W	YPL238C	YOR258W		YGR103W	YDR447C	YGR103W										YBR056C-B	YJL131C							YBR222C	YKL102C	YKL102C
YLR115W	YBR154C	YLR115W		YHR172W	YJR011C	YHR172W		YPR062W	YOR289W	YPR062W		YCR024C-B	YOR261C	YCR024C-B										YCL026C-A	YCR013C							YNL339C	YEL046C	YEL046C
YDL182W	YLR146W-A	YDL182W		YBR113W	YIL002W-A	YBR113W		YBL059C-A	YML098W	YBL059C-A		YGL230C	YLR080W	YGL230C										YMR244W	YGL029W							YEL063C	YOR072W	YOR072W
YNL104C	YHR095W	YNL104C		YGR237C	YEL029C	YGR237C		YBR111W-A	YGR129W	YBR111W-A		YJL031C	YIL020C-A	YJL031C										Q0080	YCR020W-B							YER043C	YHR126C	YHR126C
YGL071W	YLR327C	YGL071W		YLL032C	YJL171C	YLL032C		YER071C	YJL199C	YER071C		YCR003W	YNL308C	YCR003W										YHR054C								YEL032W	YLR237W	YLR237W
YMR305C	YLR287C-A	YMR305C		YFL039C	YPL139C	YFL039C		YPL238C	YML022W	YPL238C		YDR381C-A	YBR253W	YDR381C-A										YOR139C								YDR215C	Q0140	Q0140
YDL117W	YPL206C	YDL117W		YLR162W-A	YLR251W	YLR162W-A		YGR286C	YLR325C	YGR286C		YGR024C	YBL078C	YGR024C										YCR050C								YHL016C	YER184C	YER184C
YNL230C	YPL192C	YNL230C		YDL155W	YCR075W-A	YDL155W		YKL169C	YMR059W	YKL169C		YCL001W	YGR024C	YCL001W										YDR464C-A								YHL049C	YPL200W	YPL200W
YPL240C	YKL006W	YPL240C		YJL107C	YMR263W	YJL107C		YPR200C	YPR062W	YPR200C		YPL117C	YLR306W	YPL117C										YBR223W-A								YEL042W	Q0115	Q0115
YDR113C	YPL053C	YDR113C		YOR198C	YCR096C	YOR198C		YKL018C-A	YFR003C	YKL018C-A		YKL136W	YNL136W	YKL136W										YBR103C-A								YNL141W	YEL040W	YEL040W
YDR509W	YAL025C	YDR509W		YGL071W	YDR427W	YGL071W		YMR294W-A	YCR102C	YMR294W-A		YLR065C	YKR085C	YLR065C										YHR126C								YMR069W	Q0055	Q0055
YML090W	YHR043C	YML090W		YPL124W	YBL062W	YPL124W		YDR302W	YBL039W-B	YDR302W		YGR035C	YCL001W	YGR035C										YEL030C-A								YNL044W	YER039C	YER039C
YCR049C	YMR311C	YCR049C		YLR122C	YBR233W-A	YLR122C		YCR024C-A	YDL065C	YCR024C-A		YDR320C-A	YGL220W	YDR320C-A										YOR108C-A								YNL024C	YNR041C	YNR041C
YIL131C	YOL065C	YIL131C		YOR331C	YDR315C	YOR331C		YDR199W	YMR263W	YDR199W		YBR111W-A	YHR010W	YBR111W-A										YEL076C-A								YDL210W	Q0105	Q0105
YNL198C	YIL059C	YNL198C		YJL184W	YNR041C	YJL184W		YPR020W	YOL155W-A	YPR020W		YBL049W	YER053C-A	YBL049W										YLR464W								YPR012W	YBR220C	YBR220C
YPL256C	YGR219W	YPL256C		YMR163C	YGL247W	YMR163C		YGL214W	YBR167C	YGL214W		YLR408C	YPL065W	YLR408C										YLR280C								Q0250	YLL058W	YLL058W
YDR380W	YLR075W	YDR380W		YJL045W	YJR008W	YJL045W		YCL035C	YOL139C	YCL035C		YKR085C	YPL117C	YKR085C										YPR077C								YPL187W	YNL203C	YNL203C
YOR027W	YHR181W	YOR027W		YDR422C	YDL217C	YDR422C		YDR529C	YCR016W	YDR529C		YDR183C-A	YLR395C	YDR183C-A										YLR462W								YDR502C	Q0255	Q0255
YMR169C	YJR011C	YMR169C		YFL012W-A	YBL040C	YFL012W-A		YCR039C	YCR108C	YCR039C		YKL026C	YDR320C-A	YKL026C										YBL111C								YIL047C	YJL079C	YJL079C
YBR064W	YOL127W	YBR064W		YGR082W	YLR242C	YGR082W		YCL067C	YCL035C	YCL067C		YDR016C	YHR050W-A	YDR016C										YLL067C								YKL102C	YOR170W	YOR170W
YBL071W-A	YJR157W	YBL071W-A		YGL088W	YKL009W	YGL088W		YOR053W	YIL161W	YOR053W		YDR447C	YOL096C	YDR447C										YLR062C								YNL210W	YOL155W-A	YOL155W-A
YOR264W	YOL129W	YOR264W		YDR380W	YOL139C	YDR380W		YLR333C	YML030W	YLR333C		YOR261C	YPR002C-A	YOR261C										YLR061W								YOR072W	YBR208C	YBR208C
YDL127W	YKR081C	YDL127W		YLR136C	YPL206C	YLR136C		YDL065C	YMR294W-A	YDL065C		YGL220W	YDR381C-A	YGL220W																		YJL195C	YNL019C	YNL019C
YNL195C	YPR062W	YNL195C		YCL063W	YDL079C	YCL063W		YPR098C	YJR058C	YPR098C		YOR276W	YJL218W	YOR276W																		YMR238W	YHR125W	YHR125W
YBL070C	YML011C	YBL070C		YLR282C	YOL129W	YLR282C		YOR015W	YGR035W-A	YOR015W		YBR253W	YBR258C	YBR253W																		YJR073C	YJL169W	YJL169W
YLL059C	YAR019W-A	YLL059C		YOR107W	YPR109W	YOR107W		YLR298C	YOR053W	YLR298C		YLR147C	YKR014C	YLR147C																		YBR076W	YNL142W	YNL142W
YGL177W	YMR065W	YGL177W		YGL177W	YMR274C	YGL177W		YJL011C	YDR339C	YJL011C		YBL090W	YJR037W	YBL090W																		YDL217C	YIL012W	YIL012W
YNR005C	YOR376W-A	YNR005C		YGR142W	YNL157W	YGR142W		YDL212W	YER121W	YDL212W		YCR020C-A	YIL063C	YCR020C-A																		YCL038C	Q0045	Q0045
YOR035C	YHR065C	YOR035C		YML072C	YKL099C	YML072C		YPR102C	YDR302W	YPR102C		YNL308C	YOR276W	YNL308C																		YMR007W	YHR130C	YHR130C
YBL012C	YBL040C	YBL012C		YNR037C	YER117W	YNR037C		YKL033W-A	YBR111W-A	YKL033W-A		YGR187C	YDR328C	YGR187C																		YOR298W	YHL012W	YHL012W
YGL197W	YFR004W	YGL197W		YOL110W	YGL031C	YOL110W		YMR263W	YPL099C	YMR263W		YKR014C	YDR183C-A	YKR014C																		YPL111W	YER152W-A	YER152W-A
YIL026C	YLR154W-A	YIL026C		YBR232C	YLR007W	YBR232C		YOL106W	YOR258W	YOL106W		YIL063C	YLR435W	YIL063C																		YER044C-A	YPL058C	YPL058C
YBR156C	YNL308C	YBR156C		YBL012C	YKR057W	YBL012C		YCR016W	YOR015W	YCR016W		YPL065W	YAL055W	YPL065W																		YER135C	YNR075W	YNR075W
YKL036C	YOR289W	YKL036C		YHR104W	YDR079C-A	YHR104W		YDL009C	YGR286C	YDL009C		YBR262C	YLR065C	YBR262C																		Q0140	YKR039W	YKR039W
YML072C	YPR016C	YML072C		YGL061C	YOR045W	YGL061C		YDL115C	YHR043C	YDL115C		YDR288W	YCR024C-B	YDR288W																		YEL046C	YEL020C	YEL020C
YEL061C	YOR319W	YEL061C		YBL059W	YBR201C-A	YBL059W		YOL139C	YCL067C	YOL139C		YHR010W	YBL039W-B	YHR010W																		YGR055W	YJL153C	YJL153C
YOR107W	YNL153C	YOR107W		YER034W	YDR357C	YER034W		YBL039W-B	YCR039C	YBL039W-B		YGL164C	YJL031C	YGL164C																		YPL200W	Q0060	Q0060
YGR140W	YJL048C	YGR140W		YPR141C	YHR065C	YPR141C		YOR193W	YOR193W	YOR193W		YMR028W	YBR111W-A	YMR028W																		YLR237W	YLR466W	YLR466W
YPL032C	YER009W	YPL032C		YNL191W	YBR067C	YNL191W		YCL058C	YNL153C	YCL058C		YOR357C	YMR028W	YOR357C																		Q0115	YJL015C	YJL015C
YNL328C	YDR424C	YNL328C		YGL182C	YKL166C	YGL182C		YGR280C	YML063W	YGR280C		YPR002C-A	YMR143W	YPR002C-A																		YHR126C	YBR134W	YBR134W
YLR217W	YHR007C-A	YLR217W		YBL113W-A	YJL001W	YBL113W-A		YGR129W	YGR103W	YGR129W		YMR233W	YGL230C	YMR233W																		YER184C	YIR040C	YIR040C
YKR001C	YMR130W	YKR001C		YLR357W	YMR088C	YLR357W		YPL034W	YKL061W	YPL034W		YDL050C	YDR288W	YDL050C																		YNR041C	Q0085	Q0085
YML057C-A	YOR118W	YML057C-A		YOR282W	YHR191C	YOR282W		YKL061W	YBL040C	YKL061W		YBL039W-B	YGR187C	YBL039W-B																		YEL040W	YPR059C	YPR059C
YFR046C	YKR051W	YFR046C		YDR521W	YOR143C	YDR521W		YML001W	YDR056C	YML001W		YMR143W	YLR298C	YMR143W																		YER039C	YDL034W	YDL034W
YNL233W	YIL148W	YNL233W		YHR139C	YDR413C	YHR139C		YCL059C	YGR228W	YCL059C		YDR162C	YMR233W	YDR162C																		Q0055	YHR032C-A	YHR032C-A
YLR357W	YNL301C	YLR357W		YLR377C	YDR399W	YLR377C		YKL065C	YKL065C	YKL065C		YPR100W	YLR147C	YPR100W																		YNL203C	YLR342W-A	YLR342W-A
YOR141C	YLR220W	YOR141C		YNL072W	YOR175C	YNL072W		YDR056C	YDL085C-A	YDR056C		YMR173W	YDL050C	YMR173W																		YOR170W	YBR178W	YBR178W
YHR104W	YIL071W-A	YHR104W		YOL082W	YLR294C	YOL082W		YER121W	YML094W	YER121W		YLR435W	YPR100W	YLR435W																		YLL058W	YGR139W	YGR139W
YLR465C	YBR009C	YLR465C		YGL197W	YLR093C	YGL197W		YDR540C	YKL169C	YDR540C		YHR185C	YER067W	YHR185C																		YBR220C	Q0275	Q0275
YNL191W	YOR327C	YNL191W		YLR385C	YER007W	YLR385C		YDR339C	YDL115C	YDR339C		YNL070W	YMR014W	YNL070W																		YOL155W-A	Q0065	Q0065
YJL182C	YJR024C	YJL182C		YLR428C	YDR209C	YLR428C		YPL170W	YMR233W	YPL170W		YDR328C	YDR272W	YDR328C																		YJL079C	YMR244W	YMR244W
YBR152W	YMR274C	YBR152W		YOR372C	YJR012C	YOR372C		YML063W	YDL009C	YML063W		YGL244W	YKL136W	YGL244W																		Q0105	YLR222C-A	YLR222C-A
YBL031W	YDL135C	YBL031W		YER104W	YOR252W	YER104W		YBL040C	YCL058C	YBL040C		YDR272W	YBL090W	YDR272W																		YHR125W	YDR433W	YDR433W
YLR210W	YFL045C	YLR210W		YHL019W-A	YBR076W	YHL019W-A		YGR103W	YDR357C	YGR103W		YOL099C	YBR262C	YOL099C																		Q0255	YEL073C	YEL073C
YHR154W	YOL159C	YHR154W		YDL023C	YPR028W	YDL023C		YJL166W	YFL032W	YJL166W		YDL009C	YML074C	YDL009C																		YJL169W	YIL105W-A	YIL105W-A
YNL289W	YLR227C	YNL289W		YIL057C	YBR137W	YIL057C		YNL153C	YLR200W	YNL153C		YNL081C	YKL026C	YNL081C																		YHR130C	YJL171C	YJL171C
YEL030W	YMR071C	YEL030W		YDR022C	YDR008C	YDR022C		YLR325C	YAR069C	YLR325C		YLR298C	YCR020C-A	YLR298C																		YBR208C	YCL026C-A	YCL026C-A
YIL141W	YPR130C	YIL141W		YBR157C	YOR327C	YBR157C		YDR357C	YHR214C-D	YDR357C		YPL142C	YNL081C	YPL142C																		YNL130C-A	YLR462W	YLR462W
YOR301W	YDR177W	YOR301W		YGR108W	YJL048C	YGR108W		YMR233W	YJL190C	YMR233W		YFL019C	YLR287C-A	YFL019C																		YNL142W	Q0080	Q0080
YGL209W	YOR036W	YGL209W		YNL233W	YGR276C	YNL233W		YPL071C	YOR366W	YPL071C		YDR357C	YJR082C	YDR357C																		YNL019C	YHR032W-A	YHR032W-A
YMR183C	YNL149C	YMR183C		YMR117C	YJR133W	YMR117C		YML094W	YHR049C-A	YML094W		YIL148W	YIL148W	YIL148W																		YLR466W	Q0075	Q0075
YBR049C	YCR090C	YBR049C		YLR334C	YDL135C	YLR334C		YHR049C-A	YBR211C	YHR049C-A		YPL071C	YDR016C	YPL071C																		Q0045	YPL119C-A	YPL119C-A
YER034W	YJL202C	YER034W		YNL327W	YKL033W-A	YNL327W		YLR254C	YCL059C	YLR254C		YML001W	YDL172C	YML001W																		YLR120W-A	YPR160C-A	YPR160C-A
YJR112W	YLR456W	YJR112W		YPL032C	YBR262C	YPL032C		YBR211C	YHR121W	YBR211C		YCL059C	YBL049W	YCL059C																		YHL012W	YFL064C	YFL064C
YPR125W	YKL067W	YPR125W		YOR141C	YPL061W	YOR141C		YBR258C	YIL040W	YBR258C		YGR209C	YPR145C-A	YGR209C																		YIL012W	YLL055W	YLL055W
YCL041C	YPR094W	YCL041C		YPL240C	YAR071W	YPL240C		YDL181W	YPR098C	YDL181W		YPR145C-A	YPL142C	YPR145C-A																		YER152W-A	YPR076W	YPR076W
YLR428C	YDL152W	YLR428C		YGR259C	YJR074W	YGR259C		YPL123C	YKL068W-A	YPL123C		YGR215W	YMR173W	YGR215W																		YPL058C	YDR053W	YDR053W
YPL077C	YBR162W-A	YPL077C		YBR152W	YBR052C	YBR152W		YDR427W	YGL204C	YDR427W		YBR302C	YBL062W	YBR302C																		YNR075W	YHR165W-A	YHR165W-A
YJL127W-A	YCL067C	YJL127W-A		YLR142W	YMR311C	YLR142W		YLR036C	YLR333C	YLR036C		YML132W	YBR211C	YML132W																		YKR039W	YNL205C	YNL205C
YOL134C	YCR039C	YOL134C		YOR035C	YKR081C	YOR035C		YOR357C	YPL071C	YOR357C		YBR211C	YML063W	YBR211C																		YJL153C	Q0182	Q0182
YOR083W	YIL004C	YOR083W		YJR092W	YDR068W	YJR092W		YDR512C	YPL170W	YDR512C		YLR218C	YPL185W	YLR218C																		YEL020C	Q0160	Q0160
YAL024C	YFL028C	YAL024C		YMR198W	YLR400W	YMR198W		YGR222W	YDR540C	YGR222W		YDL172C	YLR408C	YDL172C																		Q0060	YOR300W	YOR300W
YNL327W	YCR005C	YNL327W		YPR108W-A	YCL001W	YPR108W-A		YOR006C	YPL123C	YOR006C		YML063W	YBR233W-A	YML063W																		YBR134W	YHR182C-A	YHR182C-A
YHR028W-A	YJL166W	YHR028W-A		YLR061W	YGL220W	YLR061W		YHR121W	YKL099C	YHR121W		YMR014W	YDR162C	YMR014W																		YDL034W	YOR139C	YOR139C
YDL041W	YDL016C	YDL041W		YBL085W	YNL133C	YBL085W		YLR200W	YKR057W	YLR200W		YOR189W	YBR302C	YOR189W																		YIR040C	YER014C-A	YER014C-A
YFR036W	YDL079C	YFR036W		YHL031C	YLR361C-A	YHL031C		YNR061C	YJL166W	YNR061C		YJR058C	YML132W	YJR058C																		Q0085	YEL075C	YEL075C
YDL003W	YBR210W	YDL003W		YER028C	YGL052W	YER028C		YJL179W	YDR427W	YJL179W		YDR378C	YEL050W-A	YDR378C																		YJL015C	YHR069C-A	YHR069C-A
YDR149C	YLR242C	YDR149C		YOR083W	YLR107W	YOR083W		YIL040W	YER071C	YIL040W		YBL094C	YDL009C	YBL094C																		YLR342W-A	YEL075W-A	YEL075W-A
YDL223C	YDL157C	YDL223C		YCL041C	YLR217W	YCL041C		YKR057W	YCR024C-A	YKR057W		YML074C	YDR357C	YML074C																		YBR178W	YFL034C-A	YFL034C-A
YPR126C	YGL031C	YPR126C		YBR130C	YLR121C	YBR130C		YJR157W	YML001W	YJR157W		YDR379C-A	YGL244W	YDR379C-A																		YGR139W	YGL188C
YBR130C	YHR132W-A	YBR130C		YGL183C	YOR073W	YGL183C		YHR088W	YKL018C-A	YHR088W		YER067W	YER121W	YER067W																		YMR244W	YAL030W
YLR322W	YGL247W	YLR322W		YIL026C	YER167W	YIL026C		YPL096W	YGL102C	YPL096W		YNR032C-A	YPL071C	YNR032C-A																		Q0275	YPL170W
YIR018W	YHR219W	YIR018W		YBL032W	YMR120C	YBL032W		YAL025C	YNL149C	YAL025C		YBR268W	YDR450W	YBR268W																		Q0065	YDR469W
YMR144W	YIL014W	YMR144W		YHL030W-A	YOR250C	YHL030W-A		YOR194C	YGL214W	YOR194C		YLR076C	YDR378C	YLR076C																		YEL073C	YFR036W
YER111C	YLR294C	YER111C		YBR156C	YPL183W-A	YBR156C		YDR494W	YLR254C	YDR494W		YBL062W	YLR076C	YBL062W																		YDR433W	YPL094C
YML031C-A	YOR175C	YML031C-A		YLR465C	YDR014W-A	YLR465C		YNL215W	YAL025C	YNL215W		YBR233W-A	YBR268W	YBR233W-A																		YCL026C-A	YMR183C
YLR379W	YDR079W	YLR379W		YPL256C	YOR027W	YPL256C		YJL190C	YCR096C	YJL190C		YEL050W-A	YDR045C	YEL050W-A																		YJL171C	YMR242C
YNL120C	YKL099C	YNL120C		YNR009W	YDR146C	YNR009W		YPL035C	YPL034W	YPL035C		YJR100C	YIL027C	YJR100C																		YLR462W	YDL091C
YLR183C	YKL196C	YLR183C		YNL120C	YLR338W	YNL120C		YCL001W	YBR258C	YCL001W		YDR286C	YMR230W	YDR286C																		YHR032W-A	YNL072W
YLR281C	YKL065W-A	YLR281C		YGL209W	YNL287W	YGL209W		YGR131W	YDR399W	YGR131W		YLR287C-A	YGR215W	YLR287C-A																		Q0075	YNL136W
YOL007C	YFL019C	YOL007C		YLR281C	YAL016C-A	YLR281C		YBR047W	YJL179W	YBR047W		YGR035W-A	YNL070W	YGR035W-A																		YLL055W	YFR008W
YGL239C	YBR067C	YGL239C		YBR049C	YGL075C	YBR049C		YKR094C	YCL001W	YKR094C		YNL179C	YGR161W-C	YNL179C																		YPL119C-A	YIL068W-A
YAL059C-A	YFR052C-A	YAL059C-A		YFR046C	YML027W	YFR046C		YBR093C	YPR020W	YBR093C		YER121W	YCL059C	YER121W																		YHR165W-A	YBL092W
YBR109W-A	YER007W	YBR109W-A		YER111C	YEL030W	YER111C		YGR037C	YNL157W	YGR037C		YDR383C	YOR357C	YDR383C																		YNL205C	YBR278W
YEL009C-A	YPR198W	YEL009C-A		YOL134C	YMR190C	YOL134C		YNL149C	YOR006C	YNL149C		YGL020C	YAL026C-A	YGL020C																		Q0160	YKL193C
YDL151C	YJL199C	YDL151C		YPL077C	YPL127C	YPL077C		YER131W	YDL181W	YER131W		YPL099C	YGL164C	YPL099C																		YOR300W	YPL250C
YMR199W	YIR031C	YMR199W		YHR087W	YHR203C	YHR087W		YDL085C-A	YDR494W	YDL085C-A		YDR045C	YFL005W	YDR045C																		YHR175W-A	YMR077C
YER165C-A	YLL042C	YER165C-A		YGR140W	YDR214W	YGR140W		YDR399W	YPR200C	YDR399W		YJR156C	YNR032C-A	YJR156C																		YBR182C-A	YPL108W
YBL100C	YHR184W	YBL100C		YPR136C	YEL059W	YPR136C		YLR423C	YLR036C	YLR423C		YAL026C-A	YML094W	YAL026C-A																		YAR020C	YKL076C
YDR526C	YJR082C	YDR526C		YER153C	YGL043W	YER153C		YKR040C	YCR005C	YKR040C		YKL021C	YML001W	YKL021C																		YEL030C-A	YPL013C
YPR096C	YPL010W	YPR096C		YIL141W	YNL333W	YIL141W		YNL211C	YOR194C	YNL211C		YJR082C	YPL038W-A	YJR082C																		YOR139C	YGL123C-A
YAL045C	YLR252W	YAL045C		YEL061C	YOL037C	YEL061C		YER187W	YHR088W	YER187W		YLR146W-A	YKL021C	YLR146W-A																		YOR108C-A	YBR126W-A
YFR035C	YDL236W	YFR035C		YLR322W	YER038W-A	YLR322W		YMR286W	YER131W	YMR286W		YBR201W	YER133W	YBR201W																		YPR059C	YLR119W
YGL218W	YBR096W	YGL218W		YKR001C	YBR223C	YKR001C		YPL220W	YIL127C	YPL220W		YHR088W	YOL109W	YHR088W																		YHR032C-A	YMR173W
YBR113W	YNR061C	YBR113W		YHR028W-A	YBR266C	YHR028W-A		YNL157W	YPL220W	YNL157W		YIL027C	YFL019C	YIL027C																		YLR222C-A	YCR003W
YDR528W	YLL032C	YDR528W		YDR113C	YPL141C	YDR113C		YBL090W	YKR094C	YBL090W		YPL108W	YCR018C-A	YPL108W																		YLR280C
YEL053W-A	YNL304W	YEL053W-A		YDR149C	YMR303C	YDR149C		YGL102C	YMR195W	YGL102C		YML009C-A	YJR058C	YML009C-A																		YIL105W-A
YCR095W-A	YPL262W	YCR095W-A		YJL064W	YPL199C	YJL064W		YPL148C	YNL211C	YPL148C		YDR468C	YLR146W-A	YDR468C																		YPR077C
YPL261C	YJL067W	YPL261C		YDR528W	YML064C	YDR528W		YHR051W	YKR083C	YHR051W		YDR450W	YOR189W	YDR450W																		Q0080
YBR277C	YGR259C	YBR277C		YML057C-A	YDL117W	YML057C-A		YDR005C	YPL096W	YDR005C		YPL003W	YDL147W	YPL003W																		YFL064C
YMR069W	YHR116W	YMR069W		YGR164W	YGL174W	YGR164W		YCR087W	YGR037C	YCR087W		YNL151C	YLR218C	YNL151C																		YPR160C-A
YDR355C	YOL136C	YDR355C		YOR025W	YML037C	YOR025W		YKL099C	YDR115W	YKL099C		YFL013W-A	YGR035W-A	YFL013W-A																		YPR076W
YLL024C	YOR132W	YLL024C		YPR126C	YGL024W	YPR126C		YKL013C	YDR512C	YKL013C		YGR161W-C	YHR088W	YGR161W-C																		YDR053W
YDR507C	YJL083W	YDR507C		YPL036W	YKL164C	YPL036W		YOL013W-B	YNR061C	YOL013W-B		YLL067W-A	YGL020C	YLL067W-A																		Q0182
YOR325W	YJL076W	YOR325W		YHR154W	YGR204W	YHR154W		YGR228W	YNL215W	YGR228W		YLL066W-A	YPL099C	YLL066W-A																		YHR182C-A
YER124C	YNR037C	YER124C		YOR247W	YMR076C	YOR247W		YLR145W	YDR086C	YLR145W		YFL068W	YGR209C	YFL068W																		YEL075W-A
YOR041C	YNR062C	YOR041C		YMR183C	YCR068W	YMR183C		YKL068W-A	YCR087W	YKL068W-A		YJL179W	YJR100C	YJL179W																		YER014C-A
YJL064W	YDR052C	YJL064W		YAL024C	YDR052C	YAL024C		YBR076C-A	YFL005W	YBR076C-A		YKL013C	YDR383C	YKL013C																		YEL075C
YIL142C-A	YDL071C	YIL142C-A		YJL182C	YLR086W	YJL182C		YFL028C	YGR131W	YFL028C		YML094W	YOL099C	YML094W																		YHR069C-A
YJL175W	YLR086W	YJL175W		YJR112W	YOL040C	YJR112W		YDR115W	YGR222W	YDR115W		YCL033C	YKL033W-A	YCL033C																		YLL067C
YGL188C-A	YPL116W	YGL188C-A		YER124C	YAL003W	YER124C		YLR065C	YPL065W	YLR065C		YJL104W	YDR315C	YJL104W																		YFL034C-A
YLR402W	YDR246W	YLR402W		YPL261C	YLR353W	YPL261C		YEL075C	YMR046W-A	YEL075C		YJL007C	YJL179W	YJL007C
YLR437C-A	YOR198C	YLR437C-A		YDR070C	YLR052W	YDR070C		YEL017C-A	YDR045C	YEL017C-A		YFL005W	YML009C-A	YFL005W
YCR064C	YHR172W	YCR064C		YEL053W-A	YML109W	YEL053W-A		YNL024C-A	YDR005C	YNL024C-A		YLR171W	YER112W	YLR171W
YDL096C	YER068C-A	YDL096C		YBR071W	YDL131W	YBR071W		YCR090C	YOR357C	YCR090C		YDL147W	YKL065C	YDL147W
YCL023C	YGR025W	YCL023C		YPR096C	YLR234W	YPR096C		YJR141W	YLR423C	YJR141W		YNL306W	YLR311C	YNL306W
YLR458W	YMR198W	YLR458W		YIR018W	YNL285W	YIR018W		YLL050C	YBR257W	YLL050C		YFR008W	YJL104W	YFR008W
YAL004W	YNL066W	YAL004W		YGR152C	YGL038C	YGR152C		YGR230W	YBL090W	YGR230W		YBR111C	YDR468C	YBR111C
YDR269C	YER038W-A	YDR269C		YPR125W	YPR145W	YPR125W		YIL086C	YNL155W	YIL086C		YGR203W	YPL108W	YGR203W
YIL021C-A	YHL019W-A	YIL021C-A		YIL131C	YPL267W	YIL131C		YLR395C	YLL050C	YLR395C		YNR062C	YDR302W	YNR062C
YJR020W	YMR190C	YJR020W		YMR169C	YPL158C	YMR169C		YKL026C	YLR145W	YKL026C		YMR063W	YGR204C-A	YMR063W
YEL075W-A	YMR094W	YEL075W-A		YFR035C	YOR073W-A	YFR035C		YKL001C	YBR047W	YKL001C		YOR010C	YNL179C	YOR010C
YJL020W-A	YIL150C	YJL020W-A		YBR277C	YDL127W	YBR277C		YER137C	YCR009C	YER137C		YLR023C	YJR094W-A	YLR023C
YER079C-A	YMR166C	YER079C-A		YAR035W	YPL222W	YAR035W		YNL146C-A	YBR093C	YNL146C-A		YLL012W	YNL151C	YLL012W
YHR218W	YOL082W	YHR218W		YBL031W	YNL304W	YBL031W		YMR046W-A	YDR532C	YMR046W-A		YFR056C	YKR081C	YFR056C
YNL339C	YHR087W	YNL339C		YOR301W	YPL250C	YOR301W		YCR096C	YHR051W	YCR096C		YPL067C	YDR426C	YPL067C
YOL046C	YER070W	YOL046C		YMR175W	YLL018C-A	YMR175W		YDR067C	YIL027C	YDR067C		YLR122C	YNL013C	YLR122C
YEL076C	YIL066W-A	YEL076C		YLR210W	YGL088W	YLR210W		YKR083C	YDR429C	YKR083C		YDR431W	YPL003W	YDR431W
YML133C	YGL182C	YML133C		YDL003W	YMR094W	YDL003W		YMR195W	YLR065C	YMR195W		YHL018W	YDR152W	YHL018W
YER190W	YMR076C	YER190W		YJL127W-A	YFL039C	YJL127W-A		YCL031C	YCL031C	YCL031C		YLR342W-A	YDR168W	YLR342W-A
YBL111C	YDR214W			YBL071W-A	YLR162W-A	YBL071W-A		YIL127C	YKL013C	YIL127C		YDL037C	YLR093C	YDL037C
YFL066C	YGL254W			YKL036C	YPL116W	YKL036C		YDR045C	YGR206W	YDR045C		YJL052W	YDR379C-A	YJL052W
YKL156C-A	YLR385C			YAL059C-A	YDR422C	YAL059C-A		YGR206W	YIL086C	YGR206W		YBR134W	YDL166C	YBR134W
YLR464W	YOR073W			YPL223C	YDR143C	YPL223C		YNL155W	YBR230C	YNL155W		YIL006W	YLR171W	YIL006W
YEL076C-A	YDR360W			YDL223C	YOR198C	YDL223C		YCR005C	YEL075C	YCR005C		YDL138W	YBR201W	YDL138W
YML009W-B	YNR067C			YNR050C	YBL002W	YNR050C		YHR050W-A	YAL026C-A	YHR050W-A		YLR378C	YKL013C	YLR378C
YNL335W	YGL153W			YIL158W	YER070W	YIL158W		YBR257W	YPR145C-A	YBR257W		YGR177C	YDR056C	YGR177C
YDR343C	YGL045W			YMR305C	YGR146C	YMR305C		YDR429C	YKR014C	YDR429C		YDL156W	YLR257W	YDL156W
YBR114W	YNL310C			YFR036W	YHR172W	YFR036W		YDR532C	YDR067C	YDR532C		YNL139C	YJL007C	YNL139C
YGR136W	YOR263C			YMR199W	YKR097W	YMR199W		YFL005W	YLR441C	YFL005W		YER052C	YDR086C	YER052C
YOR082C	YOR331C			YER165C-A	YGR203W	YER165C-A		YOR189W	YFL028C	YOR189W		YER034W	YDL212W	YER034W
YLR334C	YDL040C			YCR095W-A	YBR051W	YCR095W-A		YOL165C	YGL247W	YOL165C		YLL058W	YGR063C	YLL058W
YMR186W	YNL102W			YJL175W	YGR237C	YJL175W		YLR252W	YKL001C	YLR252W		YBR072W	YNL306W	YBR072W
YLR448W	YMR078C			YOL007C	YDL155W	YOL007C		YGL074C	YPL035C	YGL074C		YHR096C	YDR427W	YHR096C
YHR203C	YJL209W			YNL289W	YMR078C	YNL289W		YBL113W-A	YPR107C	YBL113W-A		YER065C	YLR441C	YER065C
YIL041W	YBR060C			YEL009C-A	YBR064W	YEL009C-A		YPR192W	YBR120C	YPR192W		YLR338W	YBR111C	YLR338W
YBR260C	YAR031W			YAL045C	YNL328C	YAL045C		YIL142C-A	YCR090C	YIL142C-A		YGR242W	YOR279C	YGR242W
YNL239W	YPR136C			YOR041C	YDL085W	YOR041C		YDR048C	YER137C	YDR048C		YBR220C	YHR185C	YBR220C
YDR518W	YLL018C-A			YDR507C	YDR462W	YDR507C		YJL211C	YLR395C	YJL211C		YFR032C	YGR053C	YFR032C
YBR105C	YDR521W			YDL151C	YOR331C	YDL151C		YBR182C	YOR394C-A	YBR182C		YGR054W	YDR286C	YGR054W
YJL025W	YBR232C			YDL041W	YJL107C	YDL041W		YMR094W	YPL148C	YMR094W		YGR217W	YDR034C-A	YGR217W
YHR108W	YKL147C			YDL182W	YGR082W	YDL182W		YLR353W	YNL024C-A	YLR353W		YPR202W	YER046W	YPR202W
YAR002W	YNL072W			YHR126C	YMR163C	YHR126C		YJL118W	YIR005W	YJL118W		YFL034C-B	YDR087C	YFL034C-B
YDL039C	YNL236W			YLL024C	YDR380W	YLL024C		YLR322W	YMR286W	YLR322W		YBL007C	YIL016W	YBL007C
YPL104W	YPL267W			YLR183C	YGL071W	YLR183C		YIR014W	YJR157W	YIR014W		YPR128C	YKL058W	YPR128C
YBR079C	YLR063W			YIL142C-A	YLL032C	YIL142C-A		YGR126W	YER187W	YGR126W		YBL065W	YML022W	YBL065W
YIL149C	YBR083W			YMR144W	YLR136C	YMR144W		YGL089C	YML009C-A	YGL089C		YHR176W	YCL033C	YHR176W
YJR060W	YPL016W			YDR278C	YJL184W	YDR278C		YGL125W	YDL099W	YGL125W		YHR206W	YBL094C	YHR206W
YOR087W	YDR422C			YDR355C	YMR001C	YDR355C		YLR383W	YJR141W	YLR383W		YNL191W	YDR469W	YNL191W
YOR342C	YFL039C			YNL117W	YML072C	YNL117W		YPL077C	YOR253W	YPL077C		YBR117C	YIL097W	YBR117C
YBR202W	YLL040C			YJR005C-A	YGL045W	YJR005C-A		YHR149C	YML009C	YHR149C		YKL031W	YFL013W-A	YKL031W
YHR036W	YML091C			YLR402W	YDR526C	YLR402W		YHL026C	YGL226C-A	YHL026C		YLR099C	YJR050W	YLR099C
YGL041C-B	YER153C			YCR064C	YBR113W	YCR064C		YNL230C	YPL186C	YNL230C		YER097W	YBR128C	YER097W
YBR011C	YGR237C			YBR072W	YNL198C	YBR072W		YCL014W	YPL273W	YCL014W		YKL068W	YMR194W	YKL068W
YGL061C	YER028C			YOR325W	YJL045W	YOR325W		YDR149C	YKR040C	YDR149C		YLR116W	YFR008W	YLR116W
YJR018W	YMR117C			YLR437C-A	YPL124W	YLR437C-A		YER003C	YKL026C	YER003C		YGL007W	YJR057W	YGL007W
YBR146W	YDR143C			YGL188C-A	YGR142W	YGL188C-A		YDR213W	YOL127W	YDR213W		YJL019W	YNL153C	YJL019W
YOR247W	YBL059W			YDR269C	YLR357W	YDR269C		YBR202W	YDL002C	YBR202W		YOR077W	YOL149W	YOR077W
YOR156C	YBR221C			YJR020W	YGR108W	YJR020W		YBR064W	YPR165W	YBR064W		YDL023C	YNL015W	YDL023C
YER068W	YKL115C			YDL096C	YGL197W	YDL096C		YBR152W	YBL053W	YBR152W		YMR231W	YCR087W	YMR231W
YPL085W	YJL078C			YLR157W-D	YCL063W	YLR157W-D		YNL033W	YPR100W	YNL033W		YEL031W	YLR438C-A	YEL031W
YNL054W	YOR372C			YLR458W	YGL061C	YLR458W		YNL198C	YOL013W-B	YNL198C		YKR097W	YJR156C	YKR097W
YDL240W	YGL043W			YAL004W	YPR141C	YAL004W		YFR032C	YOR189W	YFR032C		YBL073W	YER019C-A	YBL073W
YDL105W	YGR152C			YER079C-A	YMR069W	YER079C-A		YNR062C	YJL048C	YNR062C		YDR011W	YOR044W	YDR011W
YGL152C	YDR158W			YJL020W-A	YNR037C	YJL020W-A		YLR210W	YKR081C	YLR210W		YDR036C	YBR056W	YDR036C
YLR304C	YBR223C			YHR218W	YHR104W	YHR218W		YHL028W	YNL081C	YHL028W		YER090W	YDR133C	YER090W
YML037C	YBL032W			YEL076C	YLR122C	YEL076C		YOR306C	YLR093C	YOR306C		YBR240C	YJL166W	YBR240C
YDR093W	YDL023C			YOL046C	YOL082W	YOL046C		YLR115W	YDL147W	YLR115W		YOR299W	YOR366W	YOR299W
YLR383W	YPL259C			YNL339C	YIL057C	YNL339C		YGR203W	YER072W	YGR203W		YBR065C	YFL068W	YBR065C
YPR141C	YNL104C			YML133C	YOR107W	YML133C		YAL043C	YDR058C	YAL043C		YBL014C	YLL066W-A	YBL014C
YGR109C	YOR025W			YER190W	YML031C-A	YER190W		YOR371C	YDR272W	YOR371C		YKL101W	YLL067W-A	YKL101W
YPR091C	YBR071W			YKL156C-A	YFL012W-A			YFR056C	YBR210W	YFR056C		YJL118W	YDR372C	YJL118W
YDL141W	YDL117W			YJR158W	YLR334C			YEL032W	YDL157C	YEL032W		YDL039C	YKL099C	YDL039C
YLR286C	YBR158W			YDL139C	YHR139C			YGL064C	YJL031C	YGL064C		YPR009W	YBR200W-A	YPR009W
YNL187W	YMR163C			YKL147C	YHL019W-A			YGR242W	YML108W	YGR242W		YLR414C	YDR067C	YLR414C
YOR042W	YOR282W			YPR150W	YDR521W			YLR415C	YKL021C	YLR415C		YML037C	YJL140W	YML037C
YPR145W	YLR282C			YGL254W	YLR282C			YER060W-A	YOR123C	YER060W-A		YLR403W	YMR174C	YLR403W
YOR275C	YFL012W-A			YHR189W	YBL059W			YDL127W	YDR372C	YDL127W		YLR183C	YPL211W	YLR183C
YDL062W	YLR338W			YBR224W	YNL072W			YLL051C	YBR076C-A	YLL051C		YNL210W	YCR009C	YNL210W
YOR188W	YOR027W			YJL076W	YNL191W			YPL115C	YDL137W	YPL115C		YDR213W	YDR399W	YDR213W
YGL175C	YPL240C			YGR112W	YGL177W			YLR142W	YGR230W	YLR142W		YLL040C	YPL237W	YLL040C
YKL162C	YDL182W			YKL054C	YOL110W			YJR092W	YPL010W	YJR092W		YDR536W	YOR262W	YDR536W
YKL103C	YGL071W			YBL080C	YOR372C			YAR050W	YGR085C	YAR050W		YDR359C	YER042W	YDR359C
YBR065C	YGL089C			YLR045C	YBR157C			YNL221C	YNL146C-A	YNL221C		YDR355C	YDR327W	YDR355C
YJL201W	YML090W			YLL038C	YOR282W			YIL066C	YBR147W	YIL066C		YPL036W	YGL147C	YPL036W
YDR070C	YLR115W			YLR356W	YBL113W-A			YBR294W	YER146W	YBR294W		YBR222C	YLR170C	YBR222C
YOR074C	YMR305C			YOL019W	YBL012C			YPL089C	YHR052W	YPL089C		YJR109C	YER117W	YJR109C
YJL176C	YDR380W			YDR116C	YDR022C			Q0085	YMR028W	Q0085		YNR005C	YNL155W	YNR005C
YGL127C	YDR113C			YNL187W	YNL233W			YOL011W	YFL011W	YOL011W		YER043C	YER074W-A	YER043C
YMR179W	YNL230C			YLR431C	YOR141C			YBL008W	YLR104W	YBL008W		YGL240W	YGL258W-A	YGL240W
YMR139W	YIL131C			YGR256W	YPL032C			YCL037C	YER188W	YCL037C		YPL115C	YKL001C	YPL115C
YLR450W	YGL197W			YPR035W	YGL182C			YDL224C	YBR181C	YDL224C		YOR371C	YJR085C	YOR371C
YPR201W	YOR035C			YKL127W	YOR035C			YOR027W	YNL336W	YOR027W		YPL102C	YDR308C	YPL102C
YBR294W	YML072C			YNL230C	YPL240C			YBL105C	YGR204C-A	YBL105C		YDL210W	YGL226W	YDL210W
YLR234W	YPL256C			YOR047C	YLR377C			YLR116W	YJR050W	YLR116W		YMR279C	YBR024W	YMR279C
YHL030W-A	YDR509W			YDR123C	YBL085W			YGL137W	YLR408C	YGL137W		YBR105C	YCL031C	YBR105C
YDR466W	YBL071W-A			YLR390W	YER104W			YNL054W	YNL259C	YNL054W		YDR127W	YIL040W	YDR127W
YOR290C	YGL183C			YPL233W	YER034W			Q0255	YIL138C	Q0255		YER164W	YNL147W	YER164W
YDL197C	YCR049C			YOR264W	YNL327W			YOR337W	YPR028W	YOR337W		YER105C	YIL029C	YER105C
YDR029W	YOR264W			YMR231W	YBR152W			YOR348C	YNL038W	YOR348C		YPR115W	YLL050C	YPR115W
YBL013W	YMR169C			YJR053W	YBR232C			YGR041W	YBR244W	YGR041W		YIL141W	YLR460C	YIL141W
YPR168W	YDL127W			YDL040C	YLR385C			YIL160C	YLR292C	YIL160C		YOR204W	YGL005C	YOR204W
YMR231W	YIL026C			YJL083W	YDL023C			YNL161W	YMR074C	YNL161W		YMR084W	YNL177C	YMR084W
YKL035W	YML031C-A			YLL040C	YLR428C			YOR011W	YJL096W	YOR011W		YOR337W	YHR214C-E	YOR337W
YBR059C	YKR001C			YJL168C	YBR049C			YIL046W	YGL168W	YIL046W		YDL220C	YOR258W	YDL220C
YBL086C	YNL198C			YOR156C	YBL032W			YGR178C	YOR283W	YGR178C		YMR031W-A	YPL271W	YMR031W-A
YGR270W	YGR140W			YNL104C	YLR061W			YBL014C	Q0142	YBL014C		YKL164C	YMR044W	YKL164C
YPR151C	YEL061C			YLR383W	YMR198W			YHR154W	YLR252W	YHR154W		YDR507C	YLR292C	YDR507C
YDR295C	YPL032C			YKL039W	YJR092W			YGR152C	YOL165C	YGR152C		YER033C	YLR211C	YER033C
YER003C	YLR217W			YMR315W	YIL026C			YBR065C	YGR187C	YBR065C		YER087W	YDL137W	YER087W
YML114C	YOR107W			YKL031W	YGR259C			YBL007C	YOL162W	YBL007C		YER064C	YJL011C	YER064C
YMR024W	YBL070C			YNL195C	YHL031C			YKL197C	YMR014W	YKL197C		YOR328W	YHR065C	YOR328W
YNR006W	YBR064W			YOR290C	YLR142W			YLR094C	YGR275W	YLR094C		YLR180W	YGR018C	YLR180W
YPL136W	YNL195C			YDR356W	YMR117C			YIR006C	YGR235C	YIR006C		YJL109C	YDL244W	YJL109C
YLR390W	YLR379W			YDL105W	YBR156C			YDR422C	YFL046W	YDR422C		YER019W	YMR046W-A	YER019W
YER167W	YBR156C			YML091C	YHL030W-A			YMR080C	YJR008W	YMR080C		YGR190C	YCL067C	YGR190C
YBL099W	YKL036C			YOR216C	YBR130C			YBR071W	YHR050W-A	YBR071W		YDL224C	YCR039C	YDL224C
YLR353W	YLL059C			YPL136W	YKR001C			YKL147C	YNL100W	YKL147C		YER068C-A	YLL042C	YER068C-A
YOR077W	YBL012C			YNL102W	YER111C			YKL185W	YJL030W	YKL185W		YER095W	YKL138C-A	YER095W
YDR278C	YLR357W			YCR049C	YER028C			YIL026C	YBR052C	YIL026C		YKL185W	YGL102C	YKL185W
YDL241W	YGL177W			YHR059W	YPR108W-A			YGL209W	YNR022C	YGL209W		YDL096C	YNL174W	YDL096C
YKL039W	YNR005C			YJR060W	YFR046C			YOL051W	YNL285W	YOL051W		YBR182C	YKL068W-A	YBR182C
YGR041W	YNL328C			YPR030W	YGL209W			Q0060	YLR434C	Q0060		YPL068C	YNL318C	YPL068C
YDR222W	YGL239C			YDR158W	YPR136C			YMR078C	YCR095C	YMR078C		YMR190C	YNR022C	YMR190C
YOR316C-A	YFR046C			YPL262W	YCL041C			YBL073W	YHR065C	YBL073W		YAL054C	YMR294W-A	YAL054C
YOR017W	YNL233W			YLR273C	YPL077C			YOR077W	YEL017C-A	YOR077W		YBR114W	YGL050W	YBR114W
YGR112W	YOR141C			YOL052C-A	YLR465C			YKL164C	YDL219W	YKL164C		YER027C	YOL139C	YER027C
YML027W	YEL009C-A			YBR105C	YGL183C			YIL125W	YOR096W	YIL125W		YNL278W	YMR138W	YNL278W
YER104W	YML057C-A			YNL290W	YJL064W			YER028C	YIR024C	YER028C		YPR153W	YNL024C-A	YPR153W
YHR099W	YBR049C			YJL067W	YGR140W			YKL038W	YMR294W	YKL038W		YDR038C	YDR276C	YDR038C
YGL178W	YHR104W			YDR451C	YEL061C			YIL146C	YOR020C	YIL146C		Q0065	YLR254C	Q0065
YOR135C	YMR183C			YBL013W	YLR281C			YOR156C	YAL008W	YOR156C		YER086W	YOR179C	YER086W
YDR359C	YBR152W			YPL259C	YOR083W			YJL045W	YDR383C	YJL045W		YGR152C	YOR249C	YGR152C
YHR182W	YHR154W			YKL148C	YHR087W			YOL100W	YJL156W-A	YOL100W		YJL172W	YDL130W-A	YJL172W
YGR193C	YJL127W-A			YML090W	YNR009W			YKL101W	YKR068C	YKL101W		YEL063C	YPR108W	YEL063C
YMR315W	YLR210W			YDR246W	YER153C			YOR141C	YGL005C	YOR141C		YDR422C	YLR333C	YDR422C
YIL006W	YLR465C			YMR024W	YMR183C			YMR109W	YEL014C	YMR109W		YLR232W	YIL019W	YLR232W
YOR250C	YBL031W			YNL310C	YPL256C			YDR488C	YOR044W	YDR488C		YGL209W	YLR154C-G	YGL209W
YDL204W	YNL191W			YER003C	YDR113C			YKL068W	YDR315C	YKL068W		YPL231W	YLR007W	YPL231W
YAL003W	YNL289W			YOR132W	YGR164W			YPL102C	YER029C	YPL102C		YIL117C	YAR003W	YIL117C
YKR041W	YPR125W			YOL100W	YNL120C			YMR231W	YDR308C	YMR231W		YOL100W	YFL012W	YOL100W
YGL075C	YGL209W			YDR359C	YDR149C			YER166W	YLR284C	YER166W		YDL141W	YDR088C	YDL141W
YOL100W	YJL182C			YJL201W	YDR070C			YMR086W	YLR197W	YMR086W		YER167W	YLR262C	YER167W
YHL031C	YEL030W			YOL136C	YPL036W			YJR095W	YOL164W-A	YJR095W		YCR093W	YOR115C	YCR093W
YIL044C	YOR301W			YDR518W	YDR528W			YBR223C	YPR109W	YBR223C		YLR428C	YNL038W	YLR428C
YPL115C	YJR112W			YER103W	YHR028W-A			YJL092W	YDR370C	YJL092W		YBR294W	YPR099C	YBR294W
YCL037C	YPL077C			YOR017W	YIL141W			YHR139C	YDR087C	YHR139C		YAL021C	YDL158C	YAL021C
YPL137C	YIL141W			YHR116W	YOR025W			YGL177W	YJR099W	YGL177W		YER061C	YOR287C	YER061C
YAL016C-A	YAL024C			YIL044C	YPL261C			YKL204W	YLR007W	YKL204W		YIL046W	YCR090C	YIL046W
YHR143W	YLR428C			YGL218W	YHR154W			YKR097W	YLR062C	YKR097W		YMR080C	YKL150W	YMR080C
YML109W	YNL327W			YLR448W	YML057C-A			YJR154W	YOR011W-A	YJR154W		YER165W	YKL114C	YER165W
YHR149C	YFR036W			YPL232W	YOL134C			YOR188W	YIL020C-A	YOR188W		YBR141C	YJL173C	YBR141C
YGL235W	YCL041C			YBL074C	YAL024C			YPL153C	YFR010W-A	YPL153C		YLR047C	YGL030W	YLR047C
YLR052W	YER034W			YJL127C	YLR322W			YBR114W	YCL055W	YBR114W		YNL240C	YCR095C	YNL240C
YMR043W	YER111C			YER116C	YPR096C			YJL084C	YCR060W	YJL084C		YNL262W	YDL213C	YNL262W
YBL085W	YDL223C			YGR040W	YPR126C			YPR115W	YNL318C	YPR115W		YNL289W	YAL063C-A	YNL289W
YNL073W	YDL003W			YGR270W	YBR071W			YBR117C	YGR074W	YBR117C		YPL137C	YGR042W	YPL137C
YKL054C	YDL041W			YDR258C	YJR112W			YLR086W	YNL308C	YLR086W		YMR189W	YDR280W	YMR189W
YJL127C	YDR149C			YJL176C	YER124C			YHR096C	YOR179C	YHR096C		YER068W	YGL231C	YER068W
YGR142W	YOL134C			YBR011C	YPR125W			YIL047C	YNL107W	YIL047C		YIL150C	YIL177W-A	YIL150C
YGR082W	YBR109W-A			YNL096C	YOR247W			YNL282W	YJL001W	YNL282W		YHR032W-A	YJL225W-A	YHR032W-A
YHR155W	YIR018W			YLR115W	YMR169C			YIL013C	YDR473C	YIL013C		YOL058W	YOL086W-A	YOL058W
YNL287W	YBR130C			YGL153W	YJL182C			YML037C	YKL153W	YML037C		YIL066C	YDR058C	YIL066C
YLR463C	YOR083W			YBR193C	YIR018W			YAL021C	YJL140W	YAL021C		YPR145W	YKL118W	YPR145W
YOL085C	YCL023C			YML114C	YDR269C			YOL081W	YNL036W	YOL081W		YNL014W	YIR005W	YNL014W
YJL222W	YHR028W-A			YMR043W	YEL053W-A			YLR187W	YPL266W	YLR187W		YDR502C	YJR112W-A	YDR502C
YIR017W-A	YMR144W			YCL037C	YEL009C-A			YNL195C	YNL024C	YNL195C		YFR035C	YNL107W	YFR035C
YLR331C	YPR126C			YOR188W	YIL131C			YLR338W	YMR194W	YLR338W		YDL033C	YGR107W	YDL033C
YGR270C-A	YLR322W			YKL035W	YGR152C			YBR156C	YBR282W	YBR156C		YAL053W	YLR434C	YAL053W
YHR056W-A	YLR281C			YGL178W	YMR175W			YPL222W	YLL014W	YPL222W		YGL064C	YMR141C	YGL064C
	YLR183C			YBR060C	YJL127W-A			YPL116W	YOR045W	YPL116W		YHR189W	YGR206W	YHR189W
	YBL100C			YBR221C	YBL031W			YHR189W	YNR020C	YHR189W		YNL192W	YOR075W	YNL192W
	YOL007C			YBL100C	YFR035C			YGL188C-A	YOR103C	YGL188C-A		YDR143C	YPR107C	YDR143C
	YNL120C			YNL017C	YAR035W			YLR378C	YDR209C	YLR378C		YPL016W	YPL182C	YPL016W
	YPR096C			YOL085C	YLR210W			YEL061C	YHR063W-A	YEL061C		YOR348C	YKR051W	YOR348C
	YOR325W			YLR463C	YDL223C			YCR048W	YLR251W	YCR048W		YIL029W-A	YIL071W-A	YIL029W-A
	YMR199W			YJL222W	YJR020W			YPL240C	YHR143W-A	YPL240C		YPL017C	YOR164C	YPL017C
	YCR095W-A			YOR314W	YBR277C			YIR023W	YJL009W	YIR023W		YER172C	YDR115W	YER172C
	YDL151C			YBR301W	YNR050C			YDL003W	YPR052C	YDL003W		YNL105W	YDR183W	YNL105W
	YER165C-A			YIL021C-A	YOR301W			YMR198W	YPL144W	YMR198W		YML072C	YKR011C	YML072C
	YAL059C-A				YBL071W-A			YML109W	YIL052C	YML109W		YEL043W	YDR429C	YEL043W
	YPL261C				YDL003W			YCR093W	YGR053C	YCR093W		YLR393W	YBR278W	YLR393W
	YDR526C				YJL175W			YDL141W	YBR090C	YDL141W		YLR063W	YGR069W	YLR063W
	YDR528W				YPL223C			YGR189C	YCL001W-B	YGR189C		YOR290C	YKL169C	YOR290C
	YGL218W				YKL036C			YBR275C	YJR073C	YBR275C		YIR018W	YOL018C	YIR018W
	YAL045C				YCR095W-A			YDR143C	Q0010	YDR143C		YER155C	YLR312C	YER155C
	YIL021C-A				YFR036W			YOR084W	YLR022C	YOR084W		YGR139W	YNL211C	YGR139W
	YEL053W-A				YMR305C			YLL018C-A	YJR100C	YLL018C-A		YBR223C	YKR094C	YBR223C
	YBR113W				YLR157W-D			YGR190C	YML122C	YGR190C		YDR380W	YCR024C-A	YDR380W
	YFR035C				YIL158W			YGR140W	YKL040C	YGR140W		YLR094C	YMR292W	YLR094C
	YDR269C				YMR199W			YBR109W-A	YLR050C	YBR109W-A		YHR069C-A	YPR101W	YHR069C-A
	YLL024C				YER165C-A			YMR189W	YDR248C	YMR189W		YPR030W	YKL061W	YPR030W
	YMR069W				YNL289W			Q0250	YDL158C	Q0250		YLR084C	YBR257W	YLR084C
	YBR277C				YOL007C			YOR140W	YLR257W	YOR140W		YGL125W	YMR323W	YGL125W
	YDR355C				YDR278C			YNL278W	YDR469W	YNL278W		YDL170W	YKL143W	YDL170W
	YDR507C				YAL045C			YHR032W-A	YNL177C	YHR032W-A		YEL042W	YMR173W-A	YEL042W
	YJL064W				YAL059C-A			YDL096C	YBR201W	YDL096C		YER069W	YBR137W	YER069W
	YER124C				YOR041C			YER103W	YBR242W	YER103W		YJL078C	YJL136C	YJL078C
	YJR020W				YDL182W			YDR359C	YPR046W	YDR359C		YKL038W	YLR022C	YKL038W
	YOR041C				YDL041W			YPL016W	YKR011C	YPL016W		YNL033W	YOL038W	YNL033W
	YJL175W				YLL024C			Q0105	YNR074C	Q0105		YLL038C	YOL032W	YLL038C
	YLR402W				YDR507C			YLR045C	YBR137W	YLR045C		YGL188C-A	YJL001W	YGL188C-A
	YEL075W-A				YDL151C			YJL095W	YOL077C	YJL095W		YLR187W	YKL075C	YLR187W
	YIL142C-A				YHR126C			YDR509W	YOL097W-A	YDR509W		YNL282W	YEL003W	YNL282W
	YGL188C-A				YLR183C			YJL158C	YDR468C	YJL158C		YLR413W	YGR240C-A	YLR413W
	YJL020W-A				YIL142C-A			YDL085W	YDR168W	YDL085W		YJL095W	YGR253C	YJL095W
	YLR437C-A				YMR144W			YGL126W	YDR078C	YGL126W		YLR377C	YDL142C	YLR377C
	YCR064C				YDR355C			YLR063W	YMR022W	YLR063W		YJL153C	YHR005C-A	YJL153C
	YDL096C				YLR402W			YOL141W	YPL038W	YOL141W		YJL042W	YGR132C	YJL042W
	YER079C-A				YCR064C			YGL045W	YBR278W	YGL045W		YEL061C	YJR024C	YEL061C
	YLR458W				YNL117W			YOR372C	YGR147C	YOR372C		YOR140W	YOL101C	YOR140W
	YHR218W				YOR325W			Q0055	YLR025W	Q0055		YDL182W	YLR271W	YDL182W
	YAL004W				YJR005C-A			YOR107W	YOR170W	YOR107W		YOR306C	YCR014C	YOR306C
	YOL046C				YLR437C-A			YLL040C	YOL159C-A	YLL040C		YEL008W	YPR051W	YEL008W
	YEL076C				YBR072W			YPL223C	YOL149W	YPL223C		YEL019C	YGL123C-A	YEL019C
	YML133C				YER079C-A			YBR072W	YDR450W	YBR072W		YOR084W	YBR210W	YOR084W
	YER190W				YJL020W-A			YMR279C	YJR112W-A	YMR279C		YNL102W	YIL136W	YNL102W
	YNL339C				YGL188C-A			YJL078C	YGR276C	YJL078C		YEL035C	YFL032W	YEL035C
					YDL096C			YNL014W	YJL055W	YNL014W		YOL081W	YLR449W	YOL081W
					YHR218W			YIL006W	YBR067C	YIL006W		YGL028C	YDR275W	YGL028C
					YLR458W			YDR528W	YGL147C	YDR528W		YER003C	YML054C-A	YER003C
					YEL076C			YLR047C	YMR112C	YLR047C		YMR306W	YHR089C	YMR306W
					YAL004W			YOR378W	YDL160C-A	YOR378W		YLR385C	YNL032W	YLR385C
					YOL046C			YKL031W	YKR051W	YKL031W		YGL197W	YPL034W	YGL197W
					YML133C			YGR204W	YJR123W	YGR204W		YCR048W	YER012W	YCR048W
					YER190W			YLR393W	YJL169W	YLR393W		YOL011W	YKL040C	YOL011W
					YNL339C			YJL083W	YPL108W	YJL083W		YPL221W	YJR123W	YPL221W
								YIR018W	YER133W-A	YIR018W		YER184C	YGR101W	YER184C
								YCR095W-A	YKL006C-A	YCR095W-A		YLR106C	YDL027C	YLR106C
								YLL038C	YER179W	YLL038C		YJL083W	YPL220W	YJL083W
								YKL163W	YGL159W	YKL163W		YLL018C-A	YGR262C	YLL018C-A
								YGR014W	YLR041W	YGR014W		YOR011W	YLR309C	YOR011W
								YIL029W-A	YOR028C	YIL029W-A		YER166W	YPL037C	YER166W
								YOR035C	YMR065W	YOR035C		YLR415C	YCR013C	YLR415C
								YFR035C	YPL196W	YFR035C		YIL047C	YBR120C	YIL047C
								YLR281C	YCL038C	YLR281C		YGR204W	YCR096C	YGR204W
								YJL042W	YHR156C	YJL042W		YNR067C	YOR028C	YNR067C
								YLR438W	YHR170W	YLR438W		YPL111W	YCR060W	YPL111W
								YHR172W	YJL152W	YHR172W		YDR528W	YGL161C	YDR528W
								YMR144W	YLL042C	YMR144W		YCR095W-A	YER050C	YCR095W-A
								YNL262W	YDR410C	YNL262W		YEL046C	YJL205C	YEL046C
								YAL054C	YGL158W	YAL054C		YEL020C	YLR285W	YEL020C
								YGL197W	YDR088C	YGL197W		YOR301W	YNL084C	YOR301W
								YOR328W	YMR244C-A	YOR328W		YLR235C	YHR012W	YLR235C
								YDL220C	YBR183W	YDL220C		YLL051C	YDR179C	YLL051C
								YER089C	YJL023C	YER089C		YER103W	YIL030W-A	YER103W
								Q0275	YOR262W	Q0275		YDR055W	YNR061C	YDR055W
								YLR377C	YAL063C-A	YLR377C		YLR120C	YGR147C	YLR120C
								YML072C	YDR413C	YML072C		YER091C	YKL011C	YER091C
								YOR290C	YGR219W	YOR290C		YLR087C	YGR232W	YLR087C
								YDR355C	YDR152W	YDR355C		YCL026C-A	YBR242W	YCL026C-A
								YKR045C	YPR158W	YKR045C		YLL059C	YLR403W	YLL059C
								YJL019W	YDL213C	YJL019W		YOR107W	YNL139C	YOR107W
								YIL131C	YBR056W	YIL131C		YKL029C	YLL012W	YKL029C
								YDR360W	YGR101W	YDR360W		YJL084C	YIL006W	YJL084C
								YOL037C	YJR074W	YOL037C		YER017C	YNR062C	YER017C
								YOR074C	YKL114C	YOR074C		YJL064W	YGR203W	YJL064W
								YLR465C	YDL125C	YLR465C		YKR013W	YDL138W	YKR013W
								YDL151C	YPR044C	YDL151C		YDR360W	YMR063W	YDR360W
								YKR013W	YPL234C	YKR013W		YKL163W	YKL068W	YKL163W
								YIL141W	YPL171C	YIL141W		YOR153W	YLR023C	YOR153W
								YDL182W	YGR262C	YDL182W		YER060W	YLL058W	YER060W
								YMR190C	YBR013C	YMR190C		YGL045W	YHR096C	YGL045W
								YGL235W	YDR275W	YGL235W		YLR465C	YGR217W	YLR465C
								YGR032W	YGR064W	YGR032W		Q0075	YBR072W	Q0075
								YCR063W	YPL037C	YCR063W		YOR378W	YJL052W	YOR378W
								YHR102W	YOR279C	YHR102W		YBR113W	YFR032C	YBR113W
								YLR232W	YLR311C	YLR232W		YER028C	YLR378C	YER028C
								YLL059C	YLR171W	YLL059C		YLR234W	YER065C	YLR234W
								YJL127W-A	YDR379C-A	YJL127W-A		YNL187W	YGR054W	YNL187W
								YOL019W	YJL006C	YOL019W		YOR247W	YMR231W	YOR247W
								YLR087C	YOR115C	YLR087C		YCR068W	YOR010C	YCR068W
								YAL024C	YGL123W	YAL024C		YMR199W	YBL007C	YMR199W
								YNL120C	YDL172C	YNL120C		YER132C	YER052C	YER132C
								YNL187W	YEL072W	YNL187W		YHR102W	YDR011W	YHR102W
								YLR183C	YGR132C	YLR183C		YKR045C	YOR299W	YKR045C
								YDL156W	YGR076C	YDL156W		YJL127C	YDL156W	YJL127C
								YOR247W	YOR287C	YOR247W		YLR357W	Q0065	YLR357W
								YDR507C	YGR215W	YDR507C		YPL256C	YPR202W	YPL256C
								YKR054C	YAL033W	YKR054C		YOR300W	YOR077W	YOR300W
								YLR357W	YJL136C	YLR357W		YKR054C	YPL115C	YKR054C
								YNL102W	YBR111C	YNL102W		YGR014W	YGR242W	YGR014W
								YMR303C	YHR130C	YMR303C		Q0050	YBR240C	Q0050
								YDR215C	YKL138C-A	YDR215C		YHR139C	YER164W	YHR139C
								YOR301W	YGR126W	YOR301W		YPL085W	YHL018W	YPL085W
								YJL076W	YLR383W	YJL076W		YJL076W	YER105C	YJL076W
								YBR115C	YGL074C	YBR115C		YGL235W	YDL096C	YGL235W
								YMR199W	Q0085	YMR199W		YLR466W	YFR056C	YLR466W
								YNL328C	YGR178C	YNL328C		YJL127W-A	YDL037C	YJL127W-A
								YCR068W	YDR213W	YCR068W		YBR115C	YBL014C	YBR115C
								YPL085W	YHR149C	YPL085W		YCR063W	YHR176W	YCR063W
								YIL150C	YAL043C	YIL150C		YER062C	YKR097W	YER062C
								YHR165W-A	YPR192W	YHR165W-A		YGR032W	YER090W	YGR032W
								YLR385C	YPL115C	YLR385C		YBR158W	YDR431W	YBR158W
								YLR236C	YBL105C	YLR236C		YBL100C	YLR122C	YBL100C
								YPL256C	YFR032C	YPL256C		YER060W-A	YEL031W	YER060W-A
								YJL127C	YOR027W	YJL127C		YCR049C	YKL031W	YCR049C
								YJL064W	YEL032W	YJL064W		YIL066W-A	YLL040C	YIL066W-A
								YBL013W	YJL211C	YBL013W		YEL032W	YGR177C	YEL032W
								YLR121C	YLR353W	YLR121C		YHR165W-A	YER043C	YHR165W-A
								YKL102C	YCL014W	YKL102C		YOR035C	YPR115W	YOR035C
								YLR428C	YIL142C-A	YLR428C		YOL037C	YDR127W	YOL037C
								YHR099W	YBR202W	YHR099W		YNL120C	YLR099C	YNL120C
								YGL028C	YNL221C	YGL028C		YNL328C	YLR342W-A	YNL328C
								YGL218W	YMR080C	YGL218W		YHR099W	YBR220C	YHR099W
								YKL029C	YBR182C	YKL029C		YBR208C	YOR204W	YBR208C
								YNL289W	YAR050W	YNL289W		YBL070C	YHR206W	YBL070C
								YBR113W	YHL028W	YBR113W		YNL203C	YDR359C	YNL203C
								YDR344C	YJL118W	YDR344C		YMR303C	YBR134W	YMR303C
								YDR093W	YHL026C	YDR093W		YJL158C	YBR222C	YJL158C
								YER172C-A	YGL137W	YER172C-A		YLR438W	YDR038C	YLR438W
								YNL066W	YCL037C	YNL066W		YGL218W	YFL034C-B	YGL218W
								YLR235C	YPL077C	YLR235C		YBL013W	YKL101W	YBL013W
								YER165C-A	YDR422C	YER165C-A		YCL041C	YPL067C	YCL041C
								YBR158W	YBR152W	YBR158W		YOL141W	YDR213W	YOL141W
								YCR049C	YOR306C	YCR049C		YLR142W	YJL109C	YLR142W
								YNL203C	YDR149C	YNL203C		YLL024C	YBR105C	YLL024C
								YDL023C	YDR048C	YDL023C		YDR215C	YER086W	YDR215C
								YAR035W	YLL051C	YAR035W		YIR040C	YNL105W	YIR040C
								YCL041C	YBL113W-A	YCL041C		YGR189C	YLR116W	YGR189C
								YDR526C	YER003C	YDR526C		YOL007C	YNL191W	YOL007C
								YBL012C	YBR294W	YBL012C		Q0060	YDL039C	Q0060
								YIL066W-A	YGL125W	YIL066W-A		YDR093W	YJL019W	YDR093W
								YNR067C	YBL008W	YNR067C		YER089C	YLR414C	YER089C
								YDL223C	YPL089C	YDL223C		YPR096C	YJR109C	YPR096C
								YLR234W	YNL230C	YLR234W		Q0045	YER019W	Q0045
								YPR096C	YLR322W	YPR096C		YAR035W	YER034W	YAR035W
								YER070W	YMR094W	YER070W		YGL126W	YLR338W	YGL126W
								YOL007C	YLR115W	YOL007C		YOL019W	YPR128C	YOL019W
								YKR041W	YOL051W	YKR041W		YKL102C	YDR036C	YKL102C
								YBL070C	YNL161W	YBL070C		YNL066W	YER097W	YNL066W
								YEL053W-A	YNL054W	YEL053W-A		Q0255	YER033C	Q0255
								YBL100C	YOL100W	YBL100C		YNL327W	YOR371C	YNL327W
								YNL327W	YOR371C	YNL327W		YNL117W	YER167W	YNL117W
								YNL117W	YIR014W	YNL117W		YLR458W	YER095W	YLR458W
								YLL024C	YER166W	YLL024C		YHL049C	YPL036W	YHL049C
								YER153C	Q0060	YER153C		YBL012C	YGL007W	YBL012C
								YGL239C	YLR210W	YGL239C		Q0105	YBL065W	Q0105
								YER152W-A	YBL014C	YER152W-A		YOR083W	YKL164C	YOR083W
								YOR139C	YJR092W	YOR139C		Q0055	YOL100W	Q0055
								YER124C	YIR006C	YER124C		YER165C-A	YDR422C	YER165C-A
								YCR064C	YGR242W	YCR064C		YDR526C	YER064C	YDR526C
								YOR083W	YMR109W	YOR083W		Q0085	YPR009W	Q0085
								YML031C-A	YGL064C	YML031C-A		YER172C-A	YML037C	YER172C-A
								YLR458W	YOR348C	YLR458W		Q0250	YMR080C	Q0250
								YLR379W	YIL046W	YLR379W		YDR344C	YDL141W	YDR344C
								YMR305C	YBR064W	YMR305C		YKR041W	YBR065C	YKR041W
								YMR069W	YGL089C	YMR069W		YGL239C	YJL118W	YGL239C
								YLR402W	YOR011W	YLR402W		YLR121C	YBR117C	YLR121C
								YPL036W	YIL125W	YPL036W		YPL058C	YBL073W	YPL058C
								YHR126C	YBL007C	YHR126C		YER153C	YDR536W	YER153C
								YJL175W	YOL011W	YJL175W		YER070W	YDL220C	YER070W
								YLR437C-A	YLR142W	YLR437C-A		YEL053W-A	YDL210W	YEL053W-A
								YOR325W	YGR041W	YOR325W		YER152W-A	YGR139W	YER152W-A
								YAL004W	YOR337W	YAL004W		YML031C-A	YDR355C	YML031C-A
								YDR053W	YIL026C	YDR053W		YOR139C	YLR183C	YOR139C
								YLR462W	YKL068W	YLR462W		YCR064C	YAL021C	YCR064C
								YLR331C	YLR415C	YLR331C		YLR379W	YER087W	YLR379W
								YPR123C	YBR071W	YPR123C		YJL175W	YNL278W	YJL175W
								YLR157W-D	YER060W-A	YLR157W-D		Q0275	YOR328W	Q0275
								YJR020W	YGL209W	YJR020W		YER124C	YOR337W	YER124C
								YFL064C	YNL198C	YFL064C		YAL004W	YKL185W	YAL004W
								YCL023C	YLR116W	YCL023C		YNL019C	YPL231W	YNL019C
								YIR017W-A	YKL185W	YIR017W-A		YMR069W	YNL210W	YMR069W
								YJL020W-A	YHR154W	YJL020W-A		YLR402W	YGR190C	YLR402W
								YDR269C	YOR077W	YDR269C		YMR305C	YGL240W	YMR305C
								YGL217C	YOR141C	YGL217C		YLR437C-A	YMR279C	YLR437C-A
								YER079C-A	YNR062C	YER079C-A		YOR325W	YER027C	YOR325W
								YEL075W-A	YKL164C	YEL075W-A		YHR126C	YPL102C	YHR126C
								YOL046C	YIL066C	YOL046C		YJL020W-A	YLR180W	YJL020W-A
								YEL076C	YFR056C	YEL076C		YHR125W	YNR005C	YHR125W
								YHR218W	YLR094C	YHR218W		YGR270C-A	YDL023C	YGR270C-A
								YML133C	YIL160C	YML133C		YLR157W-D	YER172C	YLR157W-D
								YER190W	YKL101W	YER190W		YJR020W	YBR114W	YJR020W
								YNL339C	YOL081W	YNL339C		YJL222W-B	YCR093W	YJL222W-B
								YBL111C	YDL224C			YCL023C	YMR190C	YCL023C
								YKL156C-A	YMR086W			YDR269C	YEL063C	YDR269C
								YLR464W	YKL038W			YGL217C	YBR294W	YGL217C
								YEL076C-A	YGR203W			YPR123C	YMR031W-A	YPR123C
								YJR158W	YMR078C			YLR462W	YPL137C	YLR462W
								YCL069W	YKL197C			YER079C-A	YPL068C	YER079C-A
								YDR536W	YOR156C			YOL046C	YPR145W	YOL046C
								YHR048W	YPR115W			YEL075W-A	YAL054C	YEL075W-A
								YNL240C	YGR152C			YHR218W	YER165W	YHR218W
								YPL141C	YBR065C			YML133C	YDR507C	YML133C
								YNR072W	YMR231W			YEL076C	YMR084W	YEL076C
								YCR067C	YAL021C			YNL339C	YIL046W	YNL339C
								YHR011W	YKL204W			YER190W	YBR182C	YER190W
								YHR094C	YOR188W			YFL066C	YML072C
								YNL191W	YKR097W			YKL156C-A	YGL209W
								YJR127C	YDL127W			YJR158W	YOL058W
								YPL017C	YIL047C			YER189W	YDL224C
								YJR066W	Q0255			YKL223W	YLR047C
								YPR034W	YIL013C			YCL069W	YJL172W
								YDL138W	YIL146C			YML009W-B	YDL033C
								YGR217W	YJL084C			YBL074C	YIL117C
								YML085C	YER028C			YGR126W	YER061C
								YDL109C	YKL147C			YPL202C	YOR290C
								YCL063W	YJL045W			YLR045C	YNL262W
								YOL070C	YLR086W			YJR092W	YNL192W
								YEL030W	YBL073W			YNL202W	YGR152C
								YLR307C-A	YHR096C			YPR054W	YIL066C
								YLR099C	YDR488C			YGL089C	YDR502C
								YPL049C	YBR109W-A			YPR161C	YER155C
								YIL155C	YIR023W			YLR305C	YAL053W
								YIL123W	YDL141W			YPR144C	YER068W
								YBL075C	YBR114W			YHL007C	YIL141W
								YIL153W	YJL092W			YER073W	YMR189W
								YDR310C	YJL158C			YAL064C-A	YPR153W
								YLR058C	YPL116W			YCR006C	YLR413W
								YHR205W	YJR095W			YGL063W	YDR143C
								YBL032W	YDL096C			YBR108W	YNL289W
								YDR380W	YBR156C			YAL058W	YPL016W
								YFR018C	YBR223C			YGR197C	YLR428C
								YBR277C	YJR154W			YIR006C	YBR141C
								YGL156W	YNL033W			YLR071C	YER068C-A
								YGR078C	YPL153C			YJL159W	YDR380W
								YPL262W	YPL240C			YNL104C	YOR348C
								YPR145W	Q0055			YGR211W	YGL064C
								YHR079C	YEL061C			YLR398C	YNL240C
								YNL304W	YPL102C			YCR033W	YLR232W
								YGL038C	YML109W			YNL195C	YEL042W
								YMR306W	YCR093W			YER119C	YPL017C
								YNL139C	YGL177W			YNL204C	YLR393W
								YPR117W	YPL222W			YFR029W	YNL014W
								YOR299W	YLR187W			YIL160C	YJL078C
								YMR162C	YML037C			YHR155W	YLL038C
								YNR047W	YCR048W			YLR004C	YJL042W
								YDR097C	YLR378C			YNR037C	YOL081W
								YIL140W	YNL282W			YDR263C	YIL150C
								YDL087C	YBR275C			YNL065W	YEL043W
								YGL175C	YMR198W			YDR420W	YPR030W
								YDL170W	Q0105			YGL008C	YJL095W
								YNL273W	YNL195C			YOR336W	YIR018W
								YLR304C	YDR143C			YBR136W	YHR032W-A
								YJL201W	YDL003W			YDR149C	YLR084C
								YDL039C	YGR189C			YDR437W	YKL038W
								YJR053W	YNL278W			YBR295W	YLR063W
								YPL040C	YHR139C			YBR133C	YER166W
								YBL017C	YDR359C			YJL121C	YLR094C
								YHR070W	Q0250			YER013W	YER069W
								YBR218C	YHR189W			YER020W	YHR189W
								YOR336W	YCR095W-A			YOL130W	YGL197W
								YLL021W	YLR338W			YLR341W	YFR035C
								YOR073W	YGL188C-A			YHR103W	YLR106C
								YOR264W	YBR117C			YMR238W	YGL188C-A
								YNL299W	YOR140W			Q0115	YEL061C
								YGR068C	YMR189W			YHR098C	YGL125W
								YLR403W	YKL102C			YDL003W	YOR140W
								YDL240W	YGR140W			YBR218C	YJL153C
								YMR117C	YPL016W			YKL104C	YCR095W-A
								YIL126W	YGR190C			YJL194W	YEL019C
								YIL109C	YJL095W			YPR116W	YBR223C
								YMR031W-A	YOR084W			YOR263C	YEL035C
								YGR270W	YLL040C			YKL204W	YOR306C
								YJR129C	YER103W			YAR042W	YIL029W-A
								YML027W	YJL078C			YER152C	YLR235C
								YMR273C	YLR045C			YBR178W	YLR187W
								YKR090W	YLL018C-A			YJR129C	YLR377C
								YMR205C	YOL141W			YBR156C	YDL182W
								YGR061C	YBR072W			YOR027W	YDL170W
								YHR103W	YGL126W			YMR016C	YHR069C-A
								YBR108W	YOR372C			Q0120	YNL282W
								YML075C	YDL085W			YER011W	YER184C
								YNL236W	YDR509W			YAL024C	YEL046C
								YIR036C	YGL045W			YHR079C	YIL047C
								YJL080C	YLR063W			YHR070W	YPL221W
								YCL009C	YJL042W			YOL004W	YGL028C
								YBR112C	YHR032W-A			YLR343W	YIR040C
								YNL065W	YLR047C			YEL060C	YER091C
								YLR213C	YLL038C			YBR296C	YCR048W
								YBR060C	YOR035C			YIL131C	YEL020C
								YGL216W	YGL197W			YBR152W	YOR084W
								YBL085W	YGR204W			YJR154W	YER003C
								YLR120C	YKL031W			YOR141C	YMR306W
								YJR112W	YOR107W			Q0140	YOR011W
								YHL007C	YDR528W			YJR091C	YOL011W
								YAL058W	YIL006W			YNL053W	YNL102W
								YGR211W	YGR014W			YHR199C-A	YJL064W
								YLR313C	YML072C			YKL212W	YNR067C
								YOR129C	YMR279C			YMR144W	YGR204W
								YOR326W	YKL163W			YPL258C	YLL051C
								YOR162C	YOR290C			YEL030W	YJL083W
								YML013W	YHR172W			YBR202W	YEL008W
								YGL240W	YLR393W			YER093C	YLR385C
								YKL212W	YLR281C			YGL140C	YER017C
								YDL117W	YNL014W			YNL201C	YDR528W
								YPL261C	YJL083W			YGL131C	YLR087C
								YBL065W	YER089C			YDR509W	YLL018C-A
								YBL034C	YOR378W			YIL013C	YER103W
								YER165W	YIR018W			YHL008C	YPL111W
								YDR466W	YPL223C			YOL136C	YJL084C
								YFL034C-B	YJL127W-A			YOR171C	YLR415C
								YIL129C	YFR035C			YOR098C	YKL029C
								YDL195W	YNL262W			YDL229W	YLR120C
								YHR155W	YER172C-A			YOR389W	YDR055W
								YIL149C	YOR328W			YML085C	YOR301W
								YGL071W	YAL054C			YER116C	Q0050
								YOR041C	YHR102W			YBR078W	YOR153W
								YOR025W	YDL220C			YOR066W	YOR107W
								YPL032C	YMR144W			YCL037C	YOR300W
								YLR095C	YLR438W			YER040W	YLL059C
								YPL058C	YGR032W			YGR140W	Q0075
								YER017C	YGL235W			YFL052W	YKR013W
								YOR055W	YJL019W			YER144C	YHR102W
								YJL187C	YIL029W-A			YPL223C	YLR357W
								YOR263C	YDL182W			YJL211C	YNL033W
								YGR040W	Q0275			YKL203C	YCL026C-A
								YDR261C	YMR190C			YBR071W	YKL163W
								YOR373W	YOL037C			YGL062W	YER132C
								YCR033W	YDR355C			YOR191W	YER060W
								YOR388C	YDR215C			YIR034C	YJL127W-A
								YPR125W	YIL131C			YPL082C	YGL045W
								YAL038W	YLR087C			YJR066W	YKR054C
								YPL127C	YLR377C			YIL146C	YDR360W
								YDR127W	YKR045C			YAL043C	YCR068W
								YDR431W	YKR013W			YCL014W	YNL187W
								YGR054W	YDR360W			YHR205W	YKL102C
								YER164W	YLR357W			YMR086W	YLR465C
								YCR088W	YKR054C			YNR047W	YOR378W
								YPL137C	YAL024C			YBL082C	YJL127C
								YNL078W	YCR063W			YAL038W	YBL100C
								YFR019W	YLR465C			YNL221C	YPL085W
								YLR413W	YLR232W			YNR075W	YER028C
								YDL033C	YIL141W			YPL089C	YIL066W-A
								YHL008C	YOR074C			YHL026C	YLR234W
								YER132C	YLL059C			YMR058W	YOR247W
								YPR024W	YNL187W			YLR236C	YGL235W
								YPL082C	YDL156W			YER018C	YBR113W
								YJL107C	YOL019W			YDR123C	YHR125W
								YER060W	YDL151C			YMR244W	YGR014W
								YKL203C	YJL064W			YLR380W	YMR199W
								YHR098C	YLR183C			YPL240C	YJL020W-A
								YBR208C	YNL120C			YMR198W	YJL076W
								YBL074C	YPL085W			YOL051W	YKR045C
								YML042W	YBR115C			YEL047C	YGR032W
								YIL031W	YOR247W			YBL105C	YBR115C
								YCR010C	YCR068W			YHR182W	YHR099W
								YBR007C	YJL076W			YDL223C	YER062C
								YBR136W	YDR053W			YOR188W	YEL032W
								YDL197C	YMR303C			YIR023W	YGR270C-A
								YDR457W	YNL102W			YJR127C	YJL158C
								YMR058W	YMR199W			YOR156C	YOR035C
								YLR305C	YDR507C			YAL023C	YPL256C
								YHR182W	YOR301W			YDL171C	YCR063W
								YAR042W	YJL127C			YHR048W	YBR158W
								YIL053W	YHR099W			YPR159W	YBR208C
								YOR098C	YLR331C			YEL069C	YER060W-A
								YHR164C	YLR236C			YEL025C	YCR049C
								YOL004W	YNL328C			YNL233W	YHR139C
								YLR188W	YLR462W			YLR256W	YOL037C
								YLR430W	YPR123C			YJL079C	YLR458W
								YOR191W	YLR121C			YER114C	YDR215C
								YIL022W	YIL150C			YDR150W	YBL070C
								YLR106C	YLR385C			YLR450W	YNL328C
								YER167W	YPL256C			YNL054W	YHR165W-A
								YNL233W	YGL028C			YDR457W	YNL203C
								YBR049C	YHR165W-A			YPR035W	YMR303C
								YFR029W	YLR235C			YHL016C	YNL120C
								YDR150W	YDR093W			YAL065C	YLL024C
								YAL023C	YKL029C			YAL022C	YOL141W
								YLR398C	YBL013W			YCL009C	YLR438W
								YOR300W	YLR157W-D			YPR024W	YGL218W
								YLR286C	YGL218W			YLR342W	YBL013W
								YHL049C	YLR428C			YOR381W-A	YDR093W
								YFL067W	YGL239C			YML058W-A	Q0060
								YOR203W	YNL289W			Q0182	YLR142W
								YOR316C-A	YIL066W-A			YLR347W-A	YLR157W-D
								YLR466W	YNL066W			YOR203W	YER172C-A
								YLR347W-A	YDR344C			YJL195C	YPR096C
								YLR463C	YBR113W			YJR160C	YCL041C
								YJL195C	YER165C-A			YLR280C	YER089C
								YJL222W	YPR096C			Q0297	Q0045
								YHR182C-A	YBR158W			YPR077C	YGR189C
								YJR160C	YNL203C			Q0080	YOL007C
								YNL019C	YBL100C			YFL064C	YAR035W
								YBR301W	YAR035W			YGR022C	YGL126W
								YDR464C-A	YNR067C			YPR076W	YGL239C
								YIL021C-A	YOR139C			YDR053W	YOL019W
								YPR076W	YCR049C			YHR056W-A	YJR020W
								YGR270C-A	YDR526C			YLL067C	YJL222W-B
								YHL046C	YCL041C				YNL066W
								YHR056W-A	YDL223C				Q0055
									YDL023C				YLR466W
									YBL012C				YNL327W
									YJR020W				YCL023C
									YLR234W				Q0105
									YKR041W				Q0255
									YLL024C				YOR139C
									YOL007C				YNL117W
									YER070W				YML031C-A
									YBL070C				YBL012C
									YNL327W				YNL019C
									YEL053W-A				Q0085
									YFL064C				YDR269C
									YNL117W				YDR526C
									YCR064C				YOR083W
									YML031C-A				YER165C-A
									YER153C				YCR064C
									YIR017W-A				YLR379W
									YCL023C				Q0250
									YER152W-A				YGL217C
									YLR458W				YPR123C
									YLR379W				YLR462W
									YJL020W-A				YLR121C
									YDR269C				YDR344C
									YGL217C				YKR041W
									YER124C				YHL049C
									YLR402W				YPL058C
									YOR083W				YAL004W
									YMR069W				YER153C
									YMR305C				YER070W
									YHR126C				YEL053W-A
									YPL036W				YER152W-A
									YLR437C-A				YJL175W
									YOR325W				YER124C
									YAL004W				Q0275
									YJL175W				YLR402W
									YER079C-A				YMR069W
									YEL075W-A				YLR437C-A
									YOL046C				YOR325W
									YEL076C				YMR305C
									YHR218W				YER079C-A
									YML133C				YHR126C
									YER190W				YOL046C
									YNL339C				YEL075W-A
													YHR218W
													YML133C
													YEL076C
													YER190W
													YNL339C

## Sheet: 45fL
wt.vs.rpl22a				wt.vs.rpl22b				wt.vs.rpl34a				wt.vs.rpl34b				rpl22a.vs.rpl22b				rpl22a.vs.rpl34a				rpl22a.vs.rpl34b				rpl22b.vs.rpl34a				rpl22b.vs.rpl34b				rpl34a.vs.rpl34b
babel	DESeq2	intersection		babel	DESeq2	intersection		babel	DESeq2	intersection		babel	DESeq2	intersection		babel	DESeq2	intersection		babel	DESeq2	intersection		babel	DESeq2	intersection		babel	DESeq2	intersection		babel	YEL077W-A	intersection		babel	DESeq2	intersection
YLR061W	YLR062C	YLR061W		YFL034C-A	YDL247W	YDL247W		YIL177C	YER056C-A	YER056C-A		YIL177C	YBR266C	YBR266C		YFL034C-A	YDL247W	YDL247W		YEL032C-A	YEL032C-A	YEL032C-A		YBR266C	YBR266C	YBR266C		YEL077W-A	YEL077W-A	YEL077W-A		YBR266C	YBR266C	YBR266C		YBR266C	YBR266C	YBR266C
YLR062C	YLR061W	YLR062C		YIL177C	YFL034C-A	YFL034C-A		YNL097W-A	YJL032W	YJL032W		YBR266C	YHR219W	YHR219W		YDL247W	YFL034C-A	YFL034C-A		YER056C-A	YER056C-A	YER056C-A		YLL066W-B	YLL066W-B	YLL066W-B		YER056C-A	YER056C-A	YER056C-A		YEL077W-A	YLL066W-B	YLL066W-B		YCL068C	YIL052C	YIL052C
YOL050C	YOL050C	YOL050C		YJL032W	YJL032W	YJL032W		YER056C-A	YKL083W	YKL083W		YHR219W	YGL188C	YGL188C		YFL065C	YFL064C	YFL064C		YLR159C-A	YLR154C-H	YLR154C-H		YEL032C-A	YEL032C-A	YEL032C-A		YNL017C	YNL017C	YNL017C		YHR219W	YHR219W	YHR219W		YCL076W	YKL225W	YKL225W
YOR108C-A	YOR108C-A	YOR108C-A		YLR264C-A	YLR264C-A	YLR264C-A		YBR099C	YOL050C	YOL050C		YKL083W	YKL083W	YKL083W		YFL064C	YNL017C	YNL017C		YLR157C-C	YLR156C-A	YLR156C-A		YNL338W	YNL338W	YNL338W		YLR154C-H	YEL032C-A	YEL032C-A		YLL066W-B	YGL041C	YGL041C		YIL052C	YHR219W	YHR219W
YIL105W-A	YIL105W-A	YIL105W-A		YOL050C	YOL050C	YOL050C		YKL083W	YER067C-A	YER067C-A		YGL188C	YIL052C	YIL052C		YNL017C	YGR164W	YGR164W		YLR156C-A	YLR157C-C	YLR157C-C		YHR219W	YHR219W	YHR219W		YLR156C-A	YLR154C-H	YLR154C-H		YGL041C	YNL017C	YNL017C		YHR219W	YLL065W	YLL065W
YER014C-A	YER014C-A	YER014C-A		YDL247W	YOR108C-A	YOR108C-A		YJL032W	YBL068W-A	YBL068W-A		YIL052C	YKL202W	YKL202W		YGR164W	YBR072W	YBR072W		YLR154C-H	YLR159C-A	YLR159C-A		YGL041C	YGL041C	YGL041C		YLR157C-C	YLR156C-A	YLR156C-A		YNL017C	YLR466C-A	YLR466C-A		YGL260W	YGL260W	YGL260W
YJR079W	YJR079W	YJR079W		YOR108C-A	YIL105W-A	YIL105W-A		YER067C-A	YGL188C	YGL188C		YNL097W-A	YLR466C-A	YLR466C-A		YBR072W	YPL223C	YPL223C		YJR158W	YER038W-A	YER038W-A		YKL224C	YLR466C-A	YLR466C-A		YLR159C-A	YLR157C-C	YLR157C-C		YNL338W	YLR467C-A	YLR467C-A		YKL225W	YLR466C-A	YLR466C-A
YER053C-A	YER053C-A	YER053C-A		YIL105W-A	YOR169C	YOR169C		YBL068W-A	YBR058C-A	YBR058C-A		YKL202W	YLR467C-A	YLR467C-A		YPL223C	YMR175W	YMR175W		YMR307C-A	YMR307C-A	YMR307C-A		YIL052C	YLR467C-A	YLR467C-A		YEL032C-A	YLR159C-A	YLR159C-A		YKL224C	YOR396C-A	YOR396C-A		YBR298C-A	YLR467C-A	YLR467C-A
YJL032W	YJL032W	YJL032W		YER014C-A	YJL156W-A	YJL156W-A		YOL050C	YMR269W	YMR269W		YOR396C-A	YOR396C-A	YOR396C-A		YMR175W	YHR139C	YHR139C		YER038W-A	YBL068W-A	YBL068W-A		YHR217C	YOR396C-A	YOR396C-A		YMR307C-A	YMR307C-A	YMR307C-A		YLR467C-A	YNL338W	YNL338W		YNL338W	YOR396C-A	YOR396C-A
YIL014C-A	YLR264C-A	YIL014C-A		YJR079W	YER014C-A	YER014C-A		YJR158W	YGR008C	YGR008C		YLR466C-A	YMR269W	YMR269W		YHR139C	YJR005C-A	YJR005C-A		YBL068W-A	YDR278C	YDR278C		YJR158W	YIL052C	YIL052C		YDR278C	YDR278C	YDR278C		YLR466C-A	YKL224C	YKL224C		YER189W	YNL338W	YNL338W
YLR264C-A	YIL014C-A	YLR264C-A		YNL097W-A	YJR079W	YJR079W		YGL188C	YKL202W	YKL202W		YLR467C-A	YGR169C-A	YGR169C-A		YJR005C-A	YHR126C	YHR126C		YDR278C	YNL017C	YNL017C		YOR396C-A	YHR217C	YHR217C		YER038W-A	YER038W-A	YER038W-A		YOR396C-A	YIL052C	YIL052C		YLL065W	YBL109W	YBL109W
YOR169C	YOR169C	YOR169C		YOR169C	YJR086W	YJR086W		YBL111C	YEL039C	YEL039C		YMR269W	YGL260W	YGL260W		YHR126C	YLR062C	YLR062C		YNL017C	YER067C-A	YER067C-A		YLR466C-A	YKL224C	YKL224C		YGL041C	YHR180W-A	YHR180W-A		YIL052C	YEL032C-A	YEL032C-A		YCL058W-A	YLL066W-B	YLL066W-B
YKL066W	YLR262C-A	YKL066W		YBR099C	YAL037C-B	YAL037C-B		YBR058C-A	YLR154C-H	YLR154C-H		YJR158W	YHR217C	YHR217C		YDR542W	YLR061W	YLR061W		YER067C-A	YGL041C	YGL041C		YLR467C-A	YLR154C-H	YLR154C-H		YHR180W-A	YGL041C	YGL041C		YEL032C-A	YLR154C-H	YLR154C-H		YLR466C-A	YLR463C	YLR463C
YLR262C-A	YKL066W	YLR262C-A		YJL156W-A	YLR222C-A	YLR222C-A		YMR269W	YLR156C-A	YLR156C-A		YGR169C-A	YGR008C	YGR008C		YLR062C				YGL041C	YKL202W	YKL202W		YLR157C-C	YLR156C-A	YLR156C-A		YLR154W-E	YLR154W-E	YLR154W-E		YLR159C-A	YLR156C-A	YLR156C-A		YLR467C-A	YHR217C	YHR217C
YOL002C	YOL002C	YOL002C		YLR222C-A	YLR444C	YLR444C		YGR008C	YLR157C-C	YLR157C-C		YGR008C	YBL112C	YBL112C		YLR061W				YKL202W	YLL009C	YLL009C		YLR159C-A	YLR157C-C	YLR157C-C		YGR008C	YGR008C	YGR008C		YLR156C-A	YLR157C-C	YLR157C-C		YOR396C-A	YJR005C-A	YJR005C-A
YGL188C	YGL188C	YGL188C		YNL130C-A	YLR262C-A	YLR262C-A		YEL039C	YLR159C-A	YLR159C-A		YHR217C	YHR218W-A	YHR218W-A						YLL009C	YLL066W-B	YLL066W-B		YLR154C-H	YLR159C-A	YLR159C-A		YLL009C	YLL009C	YLL009C		YLR157C-C	YLR159C-A	YLR159C-A		YBL109W	YFL063W	YFL063W
YPR020W	YMR230W-A	YPR020W		YAL037C-B	YBL112C	YBL112C		YLR159C-A	YHR138C	YHR138C		YGL260W	YOL050C	YOL050C						YLL066W-B	YJL026C-A	YJL026C-A		YLR156C-A	YKL202W	YKL202W		YER067C-A	YER067C-A	YER067C-A		YLR154C-H	YDR278C	YDR278C		YLR463C	YAL069W	YAL069W
YKL083W	YJL156W-A	YKL083W		YJR158W	YHR218W-A	YHR218W-A		YLR157C-C	YMR321C	YMR321C		YBL111C	YGL029W	YGL029W						YLR154W-E	YLR154W-E	YLR154W-E		YKL202W	YBL109W	YBL109W		YKL202W	YKL202W	YKL202W		YDR278C	YMR307C-A	YMR307C-A		YDR545C-A	YAL064W	YAL064W
YMR230W-A	YKL083W	YMR230W-A		YDR406W-A	YNL130C-A	YNL130C-A		YLR156C-A	YDR281C	YDR281C		YGL029W	YLR198C	YLR198C						YJL026C-A	YGR008C	YGR008C		YMR307C-A	YKL225W	YKL225W		YNL285W	YNL285W	YNL285W		YMR307C-A	YJR005C-A	YJR005C-A		YLL066W-B	YDR544C	YDR544C
YJL156W-A	YPR020W	YJL156W-A		YAL016C-B	YDR406W-A	YDR406W-A		YLR154C-H	YGL029W	YGL029W		YBL112C	YBL053W	YBL053W						YGR008C	YHR180W-A	YHR180W-A		YBL109W	YMR307C-A	YMR307C-A		YDR070C	YDR070C	YDR070C		YJR005C-A	YHR217C	YHR217C		YHR217C	YIL177W-A	YIL177W-A
YAL016C-B	YGL226C-A	YAL016C-B		YIL163C	YJL015C	YJL015C		YKL202W	YLR198C	YLR198C		YHR218W-A	YER067C-A	YER067C-A						YHR180W-A	YBR266C	YBR266C		YFL015W-A	YDR278C	YDR278C		YJL026C-A	YJL026C-A	YJL026C-A		YHR217C	YBL109W	YBL109W		YJR162C	YJL225W-A	YJL225W-A
YGL226C-A	YAL016C-B	YGL226C-A		YJR086W	YMR321C	YMR321C		YHR138C	YDR322C-A	YDR322C-A		YOL050C	YOR053W	YOR053W						YBR266C	YDR500C	YDR500C		YDR278C	YFL015W-A	YFL015W-A		YOL083C-A	YHR087W	YHR087W		YBL109W	YKL202W	YKL202W		YCL073C	YCR081C-A	YCR081C-A
YNL150W	YMR321C	YNL150W		YAR064W	YGL188C	YGL188C		YMR321C	YLR262C-A	YLR262C-A		YLR198C	YLR154C-H	YLR154C-H						YDR500C	YAL045C	YAL045C		YKL223W	YLL065W	YLL065W		YOR248W	YDR500C	YDR500C		YKL202W	YLL065W	YLL065W		YJR005C-A	YBR299W	YBR299W
YEL039C	YOR170W	YEL039C		YLR444C	YAR064W	YAR064W		YDR281C	YJL189W	YJL189W		YBL053W	YLR156C-A	YLR156C-A						YAL045C	YOR265W	YOR265W		YKL225W	YNL017C	YNL017C		YHR087W	YOR265W	YOR265W		YLL065W	YKL225W	YKL225W		YHL046C	YKL221W	YKL221W
YCR024C-B	YHR130C	YCR024C-B		YLR262C-A	YIL163C	YIL163C		YGL029W	YNL244C	YNL244C		YER067C-A	YLR157C-C	YLR157C-C						YOR265W	YDR342C	YDR342C		YCL076W	YBL053W	YBL053W		YDR500C	YBR266C	YBR266C		YOR072W-B	YOR072W-B	YOR072W-B		YFL063W	YJR095W	YJR095W
YOR170W	YNL150W	YOR170W		YBL112C	YAL016C-B	YAL016C-B		YDR322C-A	YOR108C-A	YOR108C-A		YOR053W	YLR159C-A	YLR159C-A						YDR342C	YKL096C-B	YKL096C-B		YLL065W	YDR544C	YDR544C		YOR265W	YAL045C	YAL045C		YLR154W-E	YLR154W-E	YLR154W-E		YDL246C	YIR019C	YIR019C
YHR130C	YCR024C-B	YHR130C		YHR218W-A	YMR269W	YMR269W		YLR198C	YER053C-A	YER053C-A		YLR159C-A	YOR309C	YOR309C						YHR087W	YHR087W	YHR087W		YNL017C	YLR463C	YLR463C		YAL045C	YGR164W	YGR164W		YGR296C-B	YFL015W-A	YFL015W-A		YOR394C-A	YNL277W-A	YNL277W-A
YMR321C	YJR086W	YMR321C		YMR321C	YNL205C	YNL205C		YLR262C-A	YHR081W	YHR081W		YLR157C-C	YLR068W	YLR068W						YKL096C-B	YNL114C	YNL114C		YLR466C-B	YAL045C	YAL045C		YBR266C	YNL266W	YNL266W		YPL283W-B	YBL053W	YBL053W		YLR184W	YCL022C	YCL022C
YLR076C	YEL039C	YLR076C		YJL015C	YOL002C	YOL002C		YJL189W	YLR264C-A	YLR264C-A		YLR156C-A	YBR058C-A	YBR058C-A						YNL114C	YBR058C-A	YBR058C-A		YOR072W-B	YOR053W	YOR053W		YGR164W	YPR145C-A	YPR145C-A		YER190C-B	YGR008C	YGR008C		YDR543C	YPL036W	YPL036W
YNL170W	YNL170W	YNL170W		YGL188C	YBL077W	YBL077W		YNL244C	YGR182C	YGR182C		YLR154C-H	YKL225W	YKL225W						YBR058C-A	YHR039C-A	YHR039C-A		YDR544C	YGL188C	YGL188C		YNL266W	YDR342C	YDR342C		YPR204C-A	YDR070C	YDR070C		YAL069W	YEL073C	YPL187W
YBL077W	YJL015C	YBL077W		YMR269W	YGR139W	YGR139W		YHR081W	YNR025C	YNR025C		YOR309C	YNL338W	YNL338W						YHR039C-A	YDR119W-A	YDR119W-A		YBL053W	YKL083W	YKL083W		YPR145C-A	YPR108W-A	YPR108W-A		YFL015W-A	YLR463C	YLR463C		YMR326C	YER187W	YDR502C
YHR138C	YBL077W	YHR138C		YOL002C	YNL170W	YNL170W		YER053C-A	YOR234C	YOR234C		YLR068W	YGL041C	YGL041C						YDL096C	YDL096C	YDL096C		YAL045C	YLR154W-E	YLR154W-E		YDR342C	YLL066W-B	YLL066W-B		YBL111C	YDR544C	YDR544C		YAL064W	YER026C	YJL032W
YCL056C	YLR076C	YCL056C		YBL077W	YKL083W	YKL083W		YOR108C-A	YEL033W	YEL033W		YBR058C-A	YNR025C	YNR025C						YDR119W-A	YLR198C	YLR198C		YOR053W	YFL015C	YFL015C		YPR108W-A	YFR003C	YFR003C		YBL053W	YHR180W-A	YHR180W-A		YAL068W-A	YPL187W	YER056C-A
YJR086W	YHR138C	YJR086W		YNL170W	YPR020W	YPR020W		YLR264C-A	YKL096C-B	YKL096C-B		YBR099C	YHR081W	YHR081W						YLR198C	YGR204C-A	YGR204C-A		YKL083W	YER038W-A	YER038W-A		YFR003C	YBR058C-A	YBR058C-A		YKL225W	YOR053W	YOR053W		YAL066W	YDR502C
YJR135W-A	YCL056C	YJR135W-A		YPR020W	YIL014C-A	YIL014C-A		YGR182C	YLR388W	YLR388W		YNR025C	YFL015C	YFL015C						YGR122C-A	YNL266W	YNL266W		YLR463C	YGR008C	YGR008C		YBR058C-A	YLR198C	YLR198C		YGR008C	YAL045C	YAL045C		YCR108C	YJL032W
YOR102W	YJR135W-A	YOR102W		YKL083W	YKL066W	YKL066W		YNR025C	YLL020C	YLL020C		YNL338W	YLR285C-A	YLR285C-A						YNL266W	YFR010W-A	YFR010W-A		YLR154W-E	YAL069W	YAL069W		YLL066W-B	YNL114C	YNL114C		YDR070C	YCL073C	YCL073C		YLL067W-A	YER056C-A
YJL015C	YGL260W	YJL015C		YNL205C	YAL063C-A	YAL063C-A		YOR234C	YFR032C-A	YFR032C-A		YHR081W	YLR264C-A	YLR264C-A						YFR010W-A	YFR032C-A	YFR032C-A		YFL015C	YJR162C	YJR162C		YKL224C	YHR193C-A	YHR193C-A		YDR544C	YKL083W	YKL083W		YLL066W-A
YPR132W	YOR102W	YPR132W		YKL066W	YLR342W-A	YLR342W-A		YLR388W	YLL009C	YLL009C		YFL015C	YDR322C-A	YDR322C-A						YFR032C-A	YPR108W-A	YPR108W-A		YER038W-A	YFL063W	YFL063W		YLR198C	YGR146C-A	YGR146C-A		YHR180W-A	YFL015C	YFL015C		YFL068W
YMR269W	YML047W-A	YMR269W		YIL014C-A	YDR426C	YDR426C		YEL033W	YHR039C-A	YHR039C-A		YLR285C-A	YHR138C	YHR138C						YGR204C-A	YHR193C-A	YHR193C-A		YAL069W	YOR309C	YOR309C		YNL114C	YPR150W	YPR150W		YOR053W	YGL188C	YGL188C		YDR544C
YMR143W	YPR132W	YMR143W		YGR139W	YPR012W	YPR012W		YLL020C	YJL188C	YJL188C		YLR264C-A	YLL066W-B	YLL066W-B						YPR108W-A	YJR034W	YJR034W		YGR008C	YOR265W	YOR265W		YPR150W	YDR022C	YDR022C		YAL045C	YMR175W	YMR175W		YIL177W-A
YDR373W	YMR269W	YDR373W		YDR426C	YJR073C	YJR073C		YLL009C	YLR068W	YLR068W		YDR322C-A	YLR169W	YLR169W						YJR034W	YFR003C	YFR003C		YJR162C	YDR070C	YDR070C		YGR146C-A	YDR119W-A	YDR119W-A		YLR463C	YHR087W	YHR087W		YJL225W-A
YJR073C	YJR073C	YJR073C		YJR073C	YOR105W	YOR105W		YHR039C-A	YDR139C	YDR139C		YGL041C	YML047W-A	YML047W-A						YFR003C	YOR309C	YOR309C		YGL188C	YHR087W	YHR087W		YDR022C	YDR063W	YDR063W		YKL083W	YOR265W	YOR265W		YCR081C-A
YNL244C	YMR143W	YNL244C		YPR012W	YIL165C	YIL165C		YFR032C-A	YGR169C-A	YGR169C-A		YHR138C	YDR281C	YDR281C						YOR248W	YGL152C	YGL152C		YFL063W	YJL026C-A	YJL026C-A		YDR119W-A	YLR185W	YLR185W		YCL073C	YER038W-A	YER038W-A		YOR231C-A
YBR164C	YER044C	YBR164C		YAL063C-A	YGL226C-A	YGL226C-A		YJL188C	YOR309C	YOR309C		YLR169W	YDR031W	YDR031W						YOR309C	YDR133C	YDR133C		YOR309C	YCL073C	YCL073C		YDR063W	YFR010W-A	YFR010W-A		YFL015C	YCR108C	YCR108C		YBR299W
YER044C	YDR373W	YER044C		YLR342W-A	YOR102W	YOR102W		YLR068W	YDR031W	YDR031W		YDR281C	YFR001W	YFR001W						YGL152C	YNL338W	YNL338W		YOR265W	YCR108C	YCR108C		YLR185W	YFR032C-A	YFR032C-A		YMR175W	YAL069W	YAL069W		YIL032C
YMR251W-A	YNL244C	YMR251W-A		YOR102W	YCR102C	YCR102C		YKL096C-B	YDR374W-A	YDR374W-A		YKL225W	YIL008W	YIL008W						YDR133C	YHR152W	YHR152W		YCL073C	YLR198C	YLR198C		YFR010W-A	YJR034W	YJR034W		YHR087W	YLL009C	YLL009C		YJL222W-A
YOR148C	YBR164C	YOR148C		YGL226C-A	YNR074C	YNR074C		YDR139C	YIL008W	YIL008W		YDR031W	YJL202C	YJL202C						YHR193C-A	YFL015C	YFL015C		YDR070C	YLL009C	YLL009C		YFR032C-A	YBL053W	YBL053W		YOR265W	YOR215C	YOR215C		YKL221W
YJR067C	YMR251W-A	YJR067C		YOR105W	YOR170W	YOR170W		YGR169C-A	YOR277C	YOR277C		YJL202C	YEL039C	YEL039C						YHR152W	YBL053W	YBL053W		YHR087W	YDL096C	YDL096C		YHR193C-A	YGR204C-A	YGR204C-A		YCR108C	YNL285W	YNL285W		YAL068C
YOR103C	YOR148C	YOR103C		YIL165C	YCL056C	YCL056C		YOR309C	YFR001W	YFR001W		YIL008W	YOR108C-A	YOR108C-A						YNL338W	YOR189W	YOR189W		YJL026C-A	YCL022C	YCL022C		YJR034W	YOL109W	YOL109W		YAL069W	YAL055W	YAL055W		YAL059C-A
YML047W-A	YOR103C	YML047W-A		YCR102C	YMR173W-A	YMR173W-A		YDR031W	YNL170W	YNL170W		YFR001W	YLR154W-E	YLR154W-E						YFL015C	YKL122C	YKL122C		YCR108C	YNL114C	YNL114C		YBL053W	YHR039C-A	YHR039C-A		YLL009C	YPL186C	YPL186C		YJR095W
YHR054C	YJR067C	YHR054C		YNR074C	YDL153C	YDL153C		YDR374W-A	YNL162W	YNL162W		YEL039C	YOR215C	YOR215C						YBL053W	YLR200W	YLR200W		YOR394C-A	YFR003C	YFR003C		YOL109W	YGR228W	YGR228W		YOR215C	YFR003C	YFR003C		YIR019C
YBR258C	YIL029C	YBR258C		YMR173W-A	YIL040W	YIL040W		YOR277C	YJL202C	YJL202C		YLR154W-E	YLR154W-F	YLR154W-F						YKL083W	YKL083W	YKL083W		YLR198C	YIL177W-A	YIL177W-A		YHR039C-A	YJL202C	YJL202C		YAL055W	YPR150W	YPR150W		YNL318C
YKL053C-A	YHR054C	YKL053C-A		YCL056C	YHR130C	YHR130C		YIL008W	YCR020W-B	YCR020W-B		YOR215C	YJL189W	YJL189W						YKL122C	YCR020W-B	YCR020W-B		YDL096C	YJL225W-A	YJL225W-A		YGR228W	YMR175W	YMR175W		YPL186C	YGR169C-A	YGR169C-A		YNL277W-A
YOR369C	YOL106W	YOR369C		YOR170W	YOR277C	YOR277C		YNL170W	YJR135W-A	YJR135W-A		YML047W-A	YNL244C	YNL244C						YOR189W	YDR070C	YDR070C		YLL009C	YGL061C	YGL061C		YGR204C-A	YOR189W	YOR189W		YNL285W	YJL026C-A	YJL026C-A		YCL022C
YNL259C	YNL259C	YNL259C		YDL153C	YHR081W	YHR081W		YFR001W	YER019C-A	YER019C-A		YLR154W-F	YOL077W-A	YOL077W-A						YLR200W	YGR228W	YGR228W		YEL076C-A	YGR169C-A	YGR169C-A		YJL202C	YDL096C	YDL096C		YFR003C	YDL246C	YDL246C		YIR020W-A
YIL029C	YKL053C-A	YIL029C		YOR277C	YDR322C-A	YDR322C-A		YNL162W	YPR087W	YPR087W		YNL244C	YDR163W	YDR163W						YCR020W-B	YDR114C	YDR114C		YLR464W	YLL037W	YLL037W		YMR175W	YDR281C	YDR281C		YOL083C-A	YMR158W-B	YMR158W-B		YML084W
YGL260W	YJR112W-A	YGL260W		YIL040W	YLR460C	YLR460C		YJL202C	YOL002C	YOL002C		YJL189W	YHR039C-A	YHR039C-A						YKL224C	YGR259C	YGR259C		YCL022C	YGR204C-A	YGR204C-A		YOR189W	YLR388W	YLR388W		YER038W-A	YLR198C	YLR198C		YPL036W
YHR072W-A	YBR258C	YHR072W-A		YHR081W	YOL106W	YOL106W		YER019C-A	YMR251W-A	YMR251W-A		YOR108C-A	YGR182C	YGR182C						YGR259C	YDR510C-A	YDR510C-A		YNL114C	YGR115C	YGR115C		YDL096C	YDL085C-A	YDL085C-A		YGL188C	YJR162C	YJR162C		YER188C-A
YDL016C	YDL016C	YDL016C		YLR460C	YDR373W	YDR373W		YJR135W-A	YOL077W-A	YOL077W-A		YOL077W-A	YBR027C	YBR027C						YDR070C	YPL250C	YPL250C		YAL059C-A	YGR228W	YGR228W		YLR388W	YDR114C	YDR114C		YPR150W	YFL063W	YFL063W		YAR075W
YIL040W	YHR072W-A	YIL040W		YDR322C-A	YNL150W	YNL150W		YCR020W-B	YER158W-A	YER158W-A		YHR039C-A	YDR406W-A	YDR406W-A						YGR228W	YGL214W	YGL214W		YFR003C	YER067C-A	YER067C-A		YDR281C	YJL189W	YJL189W		YGR169C-A	YOL052C-A	YOL052C-A		YNL332W
YCR102C	YOR369C	YCR102C		YDR373W	YJR067C	YJR067C		YPR087W	YAL016C-B	YAL016C-B		YDR163W	YDL181W	YDL181W						YDR114C	YPR158W	YPR158W		YIL177C	YAL055W	YAL055W		YDL085C-A	YKL122C	YKL122C		YJL026C-A	YGR228W	YGR228W		YPL187W
YJR112W-A	YCR102C	YJR112W-A		YHR130C	YKL058W	YKL058W		YMR251W-A	YPL225W	YPL225W		YGR182C	YKL018C-A	YKL018C-A						YPL250C	YJL202C	YJL202C		YGR169C-A	YJR034W	YJR034W		YJL189W	YLR200W	YLR200W		YDL246C	YDR063W	YDR063W		Q0080
YJR058C	YIL040W	YJR058C		YNL150W	YMR119W-A	YMR119W-A		YOL002C	YKL136W	YKL136W		YDL181W	YML062C	YML062C						YGL214W	YOR053W	YOR053W		YIL177W-A	YFR010W-A	YFR010W-A		YDR114C	YML053C	YML053C		YJR162C	YCL069W	YCL069W		YDR502C
YNL070W	YEL050W-A	YNL070W		YJR067C	YBR164C	YBR164C		YOL077W-A	YHR136C	YHR136C		YLL066W-B	YFR032C-A	YFR032C-A						YJL202C	YLR185W	YLR185W		YJL225W-A	YOR215C	YOR215C		YKL122C	YKL083W	YKL083W		YLR198C	YOR309C	YOR309C		YCR045W-A
YKL058W	YMR119W-A	YKL058W		YKL058W	YIL029C	YIL029C		YER158W-A	YDR406W-A	YDR406W-A		YKL018C-A	YPR087W	YPR087W						YPR158W	YLL020C	YLL020C		YLL037W	YDR500C	YDR500C		YLR200W	YBL001C	YBL001C		YMR158W-B	YGR164W	YGR164W		YEL021W
YPR100W	YNL070W	YPR100W		YBR164C	YPR100W	YPR100W		YPL225W	YHR072W-A	YHR072W-A		YBR027C	YAL064W	YAL064W						YOR053W	YBR230C	YBR230C		YGL061C	YHR180W-A	YHR180W-A		YMR272W-A	YLL020C	YLL020C		YFL063W	YNL114C	YNL114C		YPR077C
YMR119W-A	YKL058W	YMR119W-A		YOL106W	YGR182C	YGR182C		YKL136W	YOR369C	YOR369C		YML062C	YJR162C	YJR162C						YLR185W	YER030W	YER030W		YGR115C	YPR108W-A	YPR108W-A		YML053C	YCR020W-B	YCR020W-B		YOL052C-A	YGR115C	YGR115C		YJL032W
YLR154W-F	YDL067C	YLR154W-F		YPR100W	YOR376W-A	YOR376W-A		YHR136C	YOR285W	YOR285W		YFR032C-A	YDL153C	YDL153C						YBR230C	YCR083W	YCR083W		YGR228W	YMR158W-B	YMR158W-B		YCR020W-B	YBR089C-A	YBR089C-A		YGR228W	YPR108W-A	YPR108W-A		YBL068W-A
YDL067C	YPR100W	YDL067C		YIL029C	YOR148C	YOR148C		YOR369C	YLR444C	YLR444C		YPR087W	YLR262C-A	YLR262C-A						YLL020C	YLL037W	YLL037W		YER067C-A	YNL079C	YNL079C		YBL001C	YPL186C	YPL186C		YDR063W	YDL130W-A	YDL130W-A		YER056C-A
YER074W-A	YJR058C	YER074W-A		YGR182C	YBR012C	YBR012C		YOR285W	YLR051C	YLR051C		YLR290C	YJR157W	YJR157W						YER030W	YDR063W	YDR063W		YGR204C-A	YML030W	YML030W		YKL083W	YHR059W	YHR059W		YCL069W	YGL061C	YGL061C
YOL106W	YER074W-A	YOL106W		YMR119W-A	YNL244C	YNL244C		YHR072W-A	YOR167C	YOR167C		YDL153C	YLR290C	YLR290C						YLL037W	YJL189W	YJL189W		YAL055W	YDL130W-A	YDL130W-A		YBR089C-A	YHR152W	YHR152W		YOR309C	YCL022C	YCL022C
YMR173W-A	YLR154W-F	YMR173W-A		YOR148C	YMR143W	YMR143W		YOR167C	YNL266W	YNL266W		YLR262C-A	YER066C-A	YER066C-A						YCR083W	YGL061C	YGL061C		YJR034W	YDL085C-A	YDL085C-A		YPL186C	YBR230C	YBR230C		YGR164W	YDL085C-A	YDL085C-A
YAL008W	YPL271W	YAL008W		YNL244C	YIR018C-A	YIR018C-A		YLR444C	YLR169W	YLR169W		YER066C-A	YDR139C	YDR139C						YJL189W	YDL121C	YDL121C		YFR010W-A	YJL202C	YJL202C		YLL020C	YFL015C	YFL015C		YNL114C	YML030W	YML030W
YNR074C	YEL033W	YNR074C		YBR012C	YER053C-A	YER053C-A		YDR500C	YDR500C	YDR500C		YDR139C	YMR039C	YMR039C						YGL041C-B	YGL041C-B	YGL041C-B		YOR215C	YJR099W	YJR099W		YHR059W	YOR053W	YOR053W		YOR248W	YGR236C	YGR236C
YDR281C	YDR281C	YDR281C		YMR143W	YKL096C-B	YKL096C-B		YLR169W	YLR285C-A	YLR285C-A		YJR157W	YML030W	YML030W						YDR063W	YDR022C	YDR022C		YHR180W-A	YMR269W	YMR269W		YHR152W	YOL077W-A	YOL077W-A		YAL059C-A	YJL202C	YJL202C
YPL271W	YAL008W	YPL271W		YER044C	YOR253W	YOR253W		YLR051C	YGR183C	YGR183C		YML030W	YLR051C	YLR051C						YDL121C	YBL028C	YBL028C		YDR500C	YGL152C	YGL152C		YBR230C	YDL130W-A	YDL130W-A		YGR115C	YOR073W-A	YOR073W-A
YEL033W	YGR063C	YEL033W		YKL053C-A	YKL053C-A	YKL053C-A		YNL266W	YFL017W-A	YFL017W-A		YMR039C	YJR087W	YJR087W						YGL061C	YGR082W	YGR082W		YPR108W-A	YOL052C-A	YOL052C-A		YOL077W-A	YLR062C	YLR062C		YGL061C	YNL266W	YNL266W
YMR150C	YNR074C	YMR150C		YCL038C	YER044C	YER044C		YGR183C	YPR145C-A	YPR145C-A		YJR087W	YEL033W	YEL033W						YBL028C	YHR217C	YHR217C		YMR158W-B	YJR005C-A	YJR005C-A		YOR053W	YOR234C	YOR234C		YDL130W-A	YLR311C	YLR311C
YGR063C	YMR173W-A	YGR063C		YOR253W	YNL024C	YNL024C		YAL016C-B	YCR097W	YCR097W		YDR424C	YJL148W	YJL148W						YDR022C	YPR142C	YPR142C		YNL079C	YPL186C	YPL186C		YLR062C	YBR269C	YBR269C		YCL022C	YPR145C-A	YPR145C-A
YCR020C-A	YMR150C	YCR020C-A		YER053C-A	YCL038C	YCL038C		YLR285C-A	YOR102W	YOR102W		YLR051C	YDR424C	YDR424C						YPR142C	YBL001C	YBL001C		YML030W	YKL122C	YKL122C		YDL130W-A	YGR146C	YGR146C		YDL085C-A	YDL181W	YDL181W
YHR081W	YLR222C-A	YHR081W		YNL024C	YJL169W	YJL169W		YFL017W-A	YDR342C	YDR342C		YEL033W	YHR007C-A	YHR007C-A						YGR082W	YDL085C-A	YDL085C-A		YDL130W-A	YFR033C	YFR033C		YOR234C	YJR005C-A	YJR005C-A		YPR108W-A	Q0010	Q0010
YEL050W-A	YCR020C-A	YEL050W-A		YBR244W	YBR244W	YBR244W		YPR145C-A	YFR052C-A	YFR052C-A		YJL148W	YHR060W	YHR060W						YHR217C	YHL031C	YHL031C		YDL085C-A	YHL031C	YHL031C		YBR269C	YMR169C	YMR169C		YML030W	YJR034W	YJR034W
YDR410C	YHR081W	YDR410C		YGR209C	YGL170C	YGL170C		YCR097W	YLR167W	YLR167W		YJR162C	YOR089C	YOR089C						YDR510C-A	YNL079C	YNL079C		YJL202C	YDR119W-A	YDR119W-A		YFL015C	YFR033C	YFR033C		YGR236C	YMR169C	YMR169C
YCL038C	YDR139C	YCL038C		YDR410C	YGR209C	YGR209C		YDR342C	YOR182C	YOR182C		YDR406W-A	YLL009C	YLL009C						YDL085C-A	YPR145C-A	YPR145C-A		YMR269W	YHR039C-A	YHR039C-A		YGR146C	YCR083W	YCR083W		YJL202C	YDR500C	YDR500C
YLR367W	YCL038C	YLR367W		YIL103W	YDR410C	YDR410C		YOR102W	YBL028C	YBL028C		YHR060W	YMR158W-B	YMR158W-B						YBL001C	YFR033C	YFR033C		YJR099W	YPR142C	YPR142C		YFR033C	YPR142C	YPR142C		YNL266W	YAL064W	YAL064W
YDR139C	YDR410C	YDR139C		YML009C-A	YBR226C	YBR226C		YDR119W-A	YHR141C	YHR141C		YHR007C-A	YBL109W	YBL109W						YNL079C	YJR023C	YJR023C		YIL021C-A	YOR216C	YOR216C		YMR169C	YDR445C	YDR445C		YOR073W-A	YDL096C	YDL096C
YLR444C	YBL039W-B	YLR444C		YJL169W	YIL103W	YIL103W		YLR167W	YLR154W-E	YLR154W-E		YLL009C	YMR321C	YMR321C						YHL031C	YDR363W-A	YDR363W-A		YGL152C	Q0010	Q0010		YCR083W	YDR363W-A	YDR363W-A		YLR311C	YBL001C	YBL001C
YOR006C	YIR030W-A	YOR006C		YHR072W-A	YHR072W-A	YHR072W-A		YFR052C-A	YDR119W-A	YDR119W-A		YOR089C	YKL096C-B	YKL096C-B						YPR145C-A	YDL062W	YDL062W		YDR543C	YGR236C	YGR236C		YJR005C-A	YGR018C	YGR018C		YPR145C-A	YIL177W-A	YIL177W-A
YDL153C	YLR367W	YDL153C		YMR251W-A	YML009C-A	YML009C-A		YHR141C	YDR424C	YDR424C		YAL064W	YKL122C	YKL122C						YFR033C	YLR021W	YLR021W		YKL122C	YLR200W	YLR200W		YPR142C	YKL036C	YKL036C		YDL181W	YJL225W-A	YJL225W-A
YIR030W-A	YOR293C-A	YIR030W-A		YGL170C	YPL052W	YPL052W		YOR182C	YKL053C-A	YKL053C-A		YLR423C	YLR423C	YLR423C						YKL223W	YMR294W-A	YMR294W-A		YPR142C	YNL266W	YNL266W		YDR445C	YLR334C	YLR334C		YJR034W	YFR033C	YFR033C
YBL039W-B	YDL153C	YBL039W-B		YPL052W	YMR251W-A	YMR251W-A		YLR154W-E	YOR052C	YOR052C		YOR257W	YOR257W	YOR257W						YDL062W	YDL130W-A	YDL130W-A		Q0010	YGR025W	YGR025W		YDR363W-A	YER030W	YER030W		Q0010	YNL079C	YNL079C
YDR322C-A	YBL112C	YDR322C-A		YOR006C	YOR006C	YOR006C		YEL021W	YJL148W	YJL148W		YKL122C	YDR196C	YDR196C						YJR023C	YDL069C	YDL069C		YHR039C-A	YOR073W-A	YOR073W-A		YGR018C	YDL069C	YDL069C		YMR169C	YJR099W	YJR099W
YBR047W	YHR218W-A	YBR047W		YNL147W	YNL259C	YNL259C		YDR424C	YKL156W	YKL156W		YDR196C	YPL225W	YPL225W						YDR363W-A	YOL109W	YOL109W		YPL186C	YDL181W	YDL181W		YLR334C	YOR215C	YOR215C		YDR500C	YFR010W-A	YFR010W-A
YNR025C	YOR006C	YNR025C		YBR226C	YNL147W	YNL147W		YKL053C-A	YDR163W	YDR163W		YMR158W-B	YHR001W-A	YHR001W-A						YMR294W-A	YFR036W	YFR036W		YFR033C	YDR063W	YDR063W		YER030W	YGL061C	YGL061C		YDL096C	YPL185W	YPL185W
YBR096W	YLR444C	YBR096W		YNL259C	YER042W	YER042W		YBL028C	YGR271C-A	YGR271C-A		YKL066W	YNR024W	YNR024W						YLR021W	YPL136W	YPL136W		YDR119W-A	YBL001C	YBL001C		YDL069C	YBR090C	YBR090C		YBL001C	YGR204C-A	YGR204C-A
YBR056W	YDR322C-A	YBR056W		YHR138C	YGR075C	YGR075C		YOR052C	YLR275W	YLR275W		YPL225W	YKL066W	YKL066W						YDL069C	YDR513W	YDR513W		YHL031C	YOR189W	YOR189W		YKL036C	YLR053C	YLR053C		YFR033C	YAR075W	YAR075W
YGR057C	YBR047W	YGR057C		YER042W	YCR020C-A	YCR020C-A		YKL156W	YBL077W	YBL077W		YHR001W-A	YBL107C	YBL107C						YPL136W	YBL059C-A	YBL059C-A		YOR216C	YDR114C	YDR114C		YOR215C	YOR309C	YOR309C		YNL079C	YPR142C	YPR142C
YGR182C	YNR025C	YGR182C		YOR376W-A	YNL303W	YNL303W		YJL148W	YDL050C	YDL050C		YMR321C	YDR512C	YDR512C						YOL109W	YJL184W	YJL184W		YOL052C-A	YCR083W	YCR083W		YGL061C	YGL226W	YGL226W		YJR099W	YDR022C	YDR022C
YBL018C	YDR183C-A	YBL018C		YGR075C	YHR138C	YHR138C		YDR163W	YKL066W	YKL066W		YNR024W	YJL188C	YJL188C						YDL130W-A	YMR194W	YMR194W		YJR005C-A	YFR049W	YFR049W		YBR090C	YLR275W	YLR275W		YFR010W-A	YOR216C	YOR216C
YNL044W	YGR057C	YNL044W		YCR020C-A	YDR183C-A	YDR183C-A		YGR271C-A	YER030W	YER030W		YBL107C	YER030W	YER030W						YFR036W	YHR139C-A	YHR139C-A		YGR236C	YLR169W	YLR169W		YOR309C	YDR199W	YDR199W		YPL185W	YHL031C	YHL031C
YOR293C-A	YBL018C	YOR293C-A		YPR132W	YPR132W	YPR132W		YBL077W	YBR047W	YBR047W		YDR512C	YBL028C	YBL028C						YDR513W	YJR087W	YJR087W		YNL266W	YBR058C-A	YBR058C-A		YPL114W	YHL031C	YHL031C		YPR142C	YGR146C-A	YGR146C-A
YOR283W	YBR096W	YOR283W		YLR252W	YLR252W	YLR252W		YLR275W	YJR087W	YJR087W		YJL188C	YPR145C-A	YPR145C-A						YBL059C-A	YBR089C-A	YBR089C-A		YLR200W	YLR273C	YLR273C		YLR275W	YMR003W	YMR003W		YIL177W-A	YKL122C	YKL122C
YDR183C-A	YNL044W	YDR183C-A		YNL303W	YGR063C	YGR063C		YDL050C	YDL153C	YDL153C		YDR063W	YBL001C	YBL001C						YJL184W	YOL014W	YOL014W		YGR025W	YAR075W	YAR075W		YGL226W	YMR194W	YMR194W		YJL225W-A	YDR114C	YDR114C
YPL197C	YOR283W	YPL197C		YGR063C	YCR024C-B	YCR024C-B		YKL066W	YPL271W	YPL271W		YER030W	YBL036C	YBL036C						YMR194W	YHR059W	YHR059W		YDL181W	YGL041C-B	YGL041C-B		YLR053C	YKR075C	YKR075C		YIL021C-A	YLR458W	YLR458W
YDR276C	YNL303W	YDR276C		YDR183C-A	YBR096W	YBR096W		YER030W	YJR079W	YJR079W		YBL001C	YDR063W	YDR063W						YOL014W	YLR275W	YLR275W		YDR063W	YDR512C	YDR512C		YDR199W	YKL156W	YKL156W		YOR216C	YMR174C	YMR174C
YNL024C	YGR182C	YNL024C		YCR024C-B	YJR135W-A	YJR135W-A		YBR047W	YER126C	YER126C		YPR145C-A	YIL139C	YIL139C						YHR059W	YMR123W	YMR123W		YBL001C	YFR032C-A	YFR032C-A		YHL031C	YKL091C	YKL091C		YDR022C	YLR200W	YLR200W
YNL303W	YNL024C	YNL303W		YBR096W	YOR283W	YOR283W		YJR087W	YBR285W	YBR285W		YBL028C	YBR285W	YBR285W						YBR089C-A	YKR085C	YKR085C		YOR073W-A	YJL184W	YJL184W		YMR003W	YJL184W	YJL184W		YHL031C	YDR512C	YDR512C
YER042W	YER042W	YER042W		YJR135W-A	YEL033W	YEL033W		YPL271W	YMR039C	YMR039C		YBR285W	YER158W-A	YER158W-A						YJR087W	YJR099W	YJR099W		YAR075W	YOR146W	YOR146W		YMR194W	YJR087W	YJR087W		YKL122C	YOR189W	YOR189W
YPL117C	YBR056W	YPL117C		YOR283W	YOL155W-A	YOL155W-A		YDL153C	YKL122C	YKL122C		YBL036C	YNL266W	YNL266W						YLR275W	YML053C	YML053C		YDR114C	YPL124W	YPL124W		YKL156W	YGR259C	YGR259C		YGR204C-A	YPL124W	YPL124W
YLR222C-A	YJR157W	YLR222C-A		YEL033W	YGL029W	YGL029W		YBR285W	YBL107C	YBL107C		YIL139C	YCR020W-B	YCR020W-B						YHR139C-A	YBR285W	YBR285W		YOR189W	YDL121C	YDL121C		YKR075C	YNL079C	YNL079C		YAR075W	YOL077W-A	YOL077W-A
YNL147W	YPL197C	YNL147W		YKL096C-B	YPR059C	YPR059C		YDR406W-A	YDR183C-A	YDR183C-A		YER158W-A	YMR311C	YMR311C						YMR123W	YKL013C	YKL013C		YCR083W	YER030W	YER030W		YJR087W	YBL028C	YBL028C		YAL064W	YLR282C	YLR282C
YOR089C	YPL117C	YOR089C		YGL029W	YGL091C	YGL091C		YMR039C	YER066C-A	YER066C-A		YLR080W	YLR080W	YLR080W						YKR085C	YPR126C	YPR126C		YLR169W	YDR510C-A	YDR510C-A		YJL184W	YMR158W-B	YMR158W-B		YLR458W	YBR269C	YBR269C
YOR253W	YNL147W	YOR253W		YGL091C	YGR057C	YGR057C		YER126C	YNL150W	YNL150W		YMR311C	YNL162W	YNL162W						YJR099W	YMR003W	YMR003W		YFR049W	YLR458W	YLR458W		YKL091C	YPR158W	YPR158W		YGR146C-A	YDR119W-A	YDR119W-A
YNR020C	YDR276C	YNR020C		YIR018C-A	YMR035W	YMR035W		YBL107C	YCR075W-A	YCR075W-A		YER053C-A	YER053C-A	YER053C-A						YML053C	YOR146W	YOR146W		YBR058C-A	YOR304C-A	YOR304C-A		YGR259C	YLR466C-A	YLR466C-A		YDR114C	YOR146W	YOR146W
YLR441C	YNR020C	YLR441C		YGR057C	YOR021C	YOR021C		YKL122C	YOL013W-B	YOL013W-B		YNL266W	YGR228W	YGR228W						YPR126C	YML028W	YML028W		YLR273C	YOR218C	YOR218C		YNL079C	YLR467C-A	YLR467C-A		YMR174C	YGL226W	YGL226W
YGR034W	YMR035W	YGR034W		YOR021C	YBR258C	YBR258C		YER066C-A	YML062C	YML062C		YNL162W	YLR275W	YLR275W						YBR285W	YNL174W	YNL174W		YGL041C-B	YBL059C-A	YBL059C-A		YBL028C	YOR396C-A	YOR396C-A		YLR200W	YLR185W	YLR185W
YIL156W-B	YOR089C	YIL156W-B		YPR059C	YEL014C	YEL014C		YNR034W-A	YLR146W-A	YLR146W-A		YCR020W-B	YCL056C	YCL056C						YOR146W	YDL100C	YDL100C		YGR122C-A	YER066C-A	YER066C-A		YMR158W-B	YML030W	YML030W		YDR512C	YJL184W	YJL184W
YMR035W	YPR012W	YMR035W		YMR035W	YLL055W	YLL055W		YNL150W	YNR034W-A	YNR034W-A		YLR327C	YDR374W-A	YDR374W-A						YNL174W	YML030W	YML030W		YFR032C-A	YDL099W	YDL099W		YPR158W	YGL214W	YGL214W		YOR189W	YDR199W	YDR199W
YHR141C	YOR253W	YHR141C		YBR258C	YMR150C	YMR150C		YJR079W	YBR085C-A	YBR085C-A		YLL065W	YLR327C	YLR327C						YMR003W	YLR388W	YLR388W		YDR512C	YGL214W	YGL214W		YGR082W	YGR082W	YGR082W		YPL124W	YLR273C	YLR273C
YHR136C	YIL156W-B	YHR136C		YEL039C	YLR036C	YLR036C		YDR183C-A	YDR016C	YDR016C		YKL096C-B	YDR544C	YDR544C						YKL013C	YER121W	YER121W		YCL069W	YFL014W	YFL014W		YGL214W	YER121W	YER121W		YOL077W-A	YHL030W-A	YHL030W-A
YLR036C	YNL235C	YLR036C		YMR150C	YBR166C	YBR166C		YCR075W-A	YMR256C	YMR256C		YFR003C	YDL065C	YDL065C						YDL100C	YER066C-A	YER066C-A		YOR146W	YGL029W	YGL029W		YML030W	YKL123W	YKL123W		YLR282C	YGR025W	YGR025W
YDR005C	YNL171C	YDR005C		YBR166C	YEL039C	YEL039C		YML062C	YBL036C	YBL036C		YCL056C	YMR040W	YMR040W						YLR388W	YMR315W	YMR315W		YJL184W	YNL180C	YNL180C		YLR466C-A	YOR146W	YOR146W		YBR269C	YML053C	YML053C
YIL111W	YLR441C	YIL111W		YLR036C	YER046W	YER046W		YLR146W-A	YDL067C	YDL067C		YGR228W	YFR003C	YFR003C						YML028W	YGR146C-A	YGR146C-A		YPL124W	YBR230C	YBR230C		YLR467C-A	YDL181W	YDL181W		YOR146W	YNR050C	YNR050C
YOR210W	YGR034W	YOR210W		YOL155W-A	YDL016C	YDL016C		YDR016C	YML047W-A	YML047W-A		YDL065C	YKR083C	YKR083C						YML030W	YGR146C	YGR146C		YDL121C	YBL031W	YBL031W		YOR396C-A	YBR072W	YBR072W		YDR119W-A	YCR083W	YCR083W
YNL171C	YIL165C	YNL171C		YER046W	YLR068W	YLR068W		YBR085C-A	YGL214W	YGL214W		YLR275W	YOR234C	YOR234C						YER121W	YHR028W-A	YHR028W-A		YER030W	YJR087W	YJR087W		YKL123W	YEL039C	YEL039C		YGL226W	YBR058C-A	YBR058C-A
YKL056C	YLR036C	YKL056C		YLR076C	YJL127C-B	YJL127C-B		YMR256C	YOR021C	YOR021C		YDR374W-A	YNL017C	YNL017C						YER066C-A	YOR304C-A	YOR304C-A		YOR248W	YNL174W	YNL174W		YOR146W	YGL041C-B	YGL041C-B		YLR185W	YLR169W	YLR169W
YGL029W	YOR210W	YGL029W		YLL055W	YLR076C	YLR076C		YBL036C	YKL076C	YKL076C		YDR119W-A	YDR119W-A	YDR119W-A						YHR028W-A	YDR521W	YDR521W		YLR458W	YKL096C-B	YKL096C-B		YER121W	YDR513W	YDR513W		YJL184W	YBR090C	YBR090C
YJR157W	YHR136C	YJR157W		YLR068W	YDR139C	YDR139C		YDL067C	YLR367W	YLR367W		YOR234C	YCR097W	YCR097W						YGR146C	YDR391C	YDR391C		YKL096C-B	YHR152W	YHR152W		YDL181W	YDL068W	YDL068W		YDR199W	YFR049W	YFR049W
YIL165C	YGL029W	YIL165C		YDL016C	YNL235C	YNL235C		YOL013W-B	YER002W	YER002W		YMR040W	YMR284W	YMR284W						YGR146C-A	YLR298C	YLR298C		YOR218C	YAR030C	YAR030C		YBR072W	YNL338W	YNL338W		YLR273C	YKL036C	YKL036C
YOL086W-A	YHR141C	YOL086W-A		YDR139C	YNR025C	YNR025C		YOR021C	YDR363W-A	YDR363W-A		YNL017C	YDR068W	YDR068W						YDR391C	YDR512C	YDR512C		YOR304C-A	YDR363W-A	YDR363W-A		YEL039C	YML028W	YML028W		YHL030W-A	YER067C-A	YER067C-A
YPR012W	YDR005C	YPR012W		YNR025C	YEL050W-A	YEL050W-A		YGL214W	YPR132W	YPR132W		YKR083C	YDR363W-A	YDR363W-A						YDR521W	YAL030W	YAL030W		YDL099W	YLR021W	YLR021W		YGL041C-B	YBL059C-A	YBL059C-A		YNR050C	YLR151C	YLR151C
YLR252W	YKL056C	YLR252W		YEL014C	YAL059W	YAL059W		YKL076C	YHR021C	YHR021C		YMR284W	YMR107W	YMR107W						YOR304C-A	YGL226W	YGL226W		YBL059C-A	YIL142C-A	YIL142C-A		YDR513W	YNL081C	YNL081C		YML053C	YBR051W	YBR051W
YNL211C	YOL086W-A	YNL211C		YAL059W	YPL119C-A	YPL119C-A		YLR367W	YPR130C	YPR130C		YNR034W-A	YNR034W-A	YNR034W-A						YMR315W	YKR075C	YKR075C		YER066C-A	YHR060W	YHR060W		YDL068W	YDR339C	YDR339C		YCR083W	YJR087W	YJR087W
YJL127C-B	YIL111W	YJL127C-B		YJL127C-B	YKL056C	YKL056C		YER002W	YGL103W	YGL103W		YCR097W	YPR188C	YPR188C						YLR298C	YBR173C	YBR173C		YGL029W	YGL226W	YGL226W		YML028W	YDR512C	YDR512C		YGR025W	YOL099C	YOL099C
YLR460C	YJL127C-B	YLR460C		YKL056C	YNL211C	YNL211C		YHR021C	YOR210W	YOR210W		YDR068W	YNL170W	YNL170W						YKR075C	YKL091C	YKL091C		YGL214W	YJR023C	YJR023C		YBL059C-A	YGL152C	YGL152C		YBR058C-A	YLR062C	YLR062C
YDL115C	YNL211C	YDL115C		YIL020C-A	YOR192C-C	YOR192C-C		YPR132W	YOR053W	YOR053W		YOR265W	YJR135W-A	YJR135W-A						YGL226W	YGR018C	YGR018C		YNL180C	YGR142W	YGR142W		YDR339C	YLR021W	YLR021W		YLR169W	YOL071W	YOL071W
YIL020C-A	YLR252W	YIL020C-A		YEL050W-A	YIL020C-A	YIL020C-A		YDR363W-A	YCR082W	YCR082W		YPR188C	YOR265W	YOR265W						YDR512C	YFR049W	YFR049W		YNL174W	YDR162C	YDR162C		YNL081C	YJR099W	YJR099W		YBR090C	YDL041W	YDL041W
YBL036C	YJL169W	YBL036C		YPR046W	YPR046W	YPR046W		YPR130C	YER142C	YER142C		YDR363W-A	YLL037W	YLL037W						YAL030W	YGL029W	YGL029W		YBR230C	YHR050W-A	YHR050W-A		YDR512C	YLR311C	YLR311C		YFR049W	YBL108C-A	YBL108C-A
YDR447C	YDL115C	YDR447C		YNL211C	YJL142C	YJL142C		YGL103W	YOR089C	YOR089C		YMR107W	YNL079C	YNL079C						YBR173C	YOR135C	YOR135C		YFL014W	YBL028C	YBL028C		YLR021W	YGL108C	YGL108C		YKL036C	YOR218C	YOR218C
YBR210W	YBL036C	YBR210W		YNL235C	YPL273W	YPL273W		YOR210W	YFL015C	YFL015C		YNL170W	YGR183C	YGR183C						YGR018C	YLR169W	YLR169W		YJR087W	YPR150W	YPR150W		YGL152C	YDL158C	YDL158C		YLR151C	YHR001W-A	YHR001W-A
YNL336W	YBR210W	YNL336W		YPL273W	YER071C	YER071C		YER142C	YOR169C	YOR169C		YNL079C	YPL013C	YPL013C						YGL029W	YGR142W	YGR142W		YBL031W	YDL062W	YDL062W		YJR099W	YPL250C	YPL250C		YER067C-A	YLL037W	YLL037W
YPR010C-A	YLR460C	YPR010C-A		YER071C	YJL148W	YJL148W		YOR169C	YER012W	YER012W		YJR135W-A	YLR361C-A	YLR361C-A						YOR135C	YNL081C	YNL081C		YHR152W	YJL131C	YJL131C		YLR311C	YDR201W	YDR201W		YJR087W	YDR363W-A	YDR363W-A
YNL235C	YIL020C-A	YNL235C		YJL142C	YAL008W	YAL008W		YOR053W	YDR426C	YDR426C		YGR183C	YDR500C	YDR500C						YKL091C	YDL181W	YDL181W		YIL142C-A	YDR022C	YDR022C		YGL108C	YMR294W-A	YMR294W-A		YBR051W	YBR072W	YBR072W
YIL027C	YDR447C	YIL027C		YOR192C-C	YIR030W-A	YIR030W-A		YCR082W	YPR010C-A	YPR010C-A		YDR500C	YIL111W	YIL111W						YFR049W	YJL188C	YJL188C		YAR030C	YOL071W	YOL071W		YDL158C	YDL061C	YDL061C		YDL041W	YBL031W	YBL031W
YLR078C	YIL027C	YLR078C		YPL119C-A	YDR005C	YDR005C		YER012W	YNL017C	YNL017C		YLR361C-A	YPL170W	YPL170W						YKL097C	YBR269C	YBR269C		YDR363W-A	YLR438C-A	YLR438C-A		YPL250C	YFR036W	YFR036W		YOL099C	YER066C-A	YER066C-A
YIL008W	YNL336W	YIL008W		YAL008W	YLR043C	YLR043C		YOR089C	YDR373W	YDR373W		YIL111W	YLL020C	YLL020C						YJL188C	YKL097C	YKL097C		YLR021W	YPR158W	YPR158W		YNL338W	YOL052C-A	YOL052C-A		YLR062C	YGL108C	YGL108C
YER142C	YIL008W	YER142C		YJL148W	YOR210W	YOR210W		YML047W-A	YBL026W	YBL026W		YPL013C	YLR421C	YLR421C						YGR142W	YDR339C	YDR339C		YHR060W	YLR185W	YLR185W		YDR201W	YJR023C	YJR023C		YOL071W	YHR060W	YHR060W
YER046W	YPR010C-A	YER046W		YLR043C	YLR242C	YLR242C		YPR010C-A	YDR513W	YDR513W		YBL109W	YHR049C-A	YHR049C-A						YLR169W	YBR090C	YBR090C		YGL226W	YDR199W	YDR199W		YMR294W-A	YDL062W	YDL062W		YOR218C	YGR146C	YGR146C
YKL001C	YKL001C	YKL001C		YDR005C	YER074W-A	YER074W-A		YDR513W	YHR219W	YHR219W		YDR544C	YOR285W	YOR285W						YNL081C	YKL107W	YKL107W		YJR023C	YLR311C	YLR311C		YDL061C	YER019C-A	YER019C-A		YHR001W-A	YBR157C	YBR157C
YOR234C	YER142C	YOR234C		YIL111W	YPL211W	YPL211W		YDR063W	YPR187W	YPR187W		YLR421C	YKL076C	YKL076C						YBR269C	YFR032C	YFR032C		YGR142W	YKR040C	YKR040C		YFR036W	YER066C-A	YER066C-A		YDR363W-A	YBR230C	YBR230C
YML009C-A	YLR078C	YML009C-A		YGR183C	YGR183C	YGR183C		YDR373W	YDR063W	YDR063W		YPL170W	YPL123C	YPL123C						YDL181W	YIL014C-A	YIL014C-A		YHR050W-A	YLR068W	YLR068W		YJR023C	YBR162W-A	YBR162W-A		YBR072W	YNL180C	YNL180C
YOR021C	YER046W	YOR021C		YOR210W	YIL027C	YIL027C		YNL017C	YDL181W	YDL181W		YOR285W	YKL082C	YKL082C						YBR090C	Q0060	Q0060		YDR510C-A	YML053C	YML053C		YOL052C-A	YNL122C	YNL122C		YBL031W	YPL170W	YPL170W
YER117W	YML009C-A	YER117W		YLR242C	YPL095C	YPL095C		YDR426C	YCL056C	YCL056C		YPL123C	YGL214W	YGL214W						YDR339C	YOR306C	YOR306C		YDL062W	YNL277W-A	YNL277W-A		YDL062W	YDR067C	YDR067C		YLL037W	YFR032C-A	YFR032C-A
YDR058C	YDR058C	YDR058C		YER074W-A	YIL111W	YIL111W		YFL015C	YGR209C	YGR209C		YLL037W	YDR177W	YDR177W						YLR377C	YCR010C	YCR010C		YDR162C	YKL117W	YKL117W		YER019C-A	YJL188C	YJL188C		YGL108C	YHR039C-A	YHR039C-A
YOR285W	YCR018C-A	YOR285W		YPL095C	YPL117C	YPL117C		YDL181W	YHR007C-A	YHR007C-A		YKL076C	YGR271C-A	YGR271C-A						YNL205C	YMR194C-A	YMR194C-A		YBL028C	YHR028W-A	YHR028W-A		YER066C-A	YGL188C-A	YGL188C-A		YER066C-A	YFL014W	YFL014W
YCR018C-A	YOR021C	YCR018C-A		YPL211W	YKL169C	YKL169C		YBL026W	YNL228W	YNL228W		YLL020C	YNL215W	YNL215W						YGL226C-A	YIR040C	YIR040C		YJL131C	YAL030W	YAL030W		YBR162W-A	YOL108C	YOL108C		YBL108C-A	YLR334C	YLR334C
YKR074W	YOR234C	YKR074W		YIL027C	YPR109W	YPR109W		YPR187W	YHR060W	YHR060W		YHR049C-A	YNL228W	YNL228W						YER113C	YLR042C	YLR042C		YPR150W	YOL099C	YOL099C		YNL122C	YKL076C	YKL076C		YHR060W	YDL099W	YDL099W
YDR381C-A	YKL162C-A	YDR381C-A		YIR030W-A	YBR210W	YBR210W		YHR219W	YBL053W	YBL053W		YHR050W-A	YHR050W-A	YHR050W-A						YML058W-A	YLR307W	YLR307W		YJR140W-A	YBR269C	YBR269C		YDR067C	YBR278W	YBR278W		YGR146C	YBL059C-A	YBL059C-A
YJL169W	YKR074W	YJL169W		YPR109W	YCR018C-A	YCR018C-A		YGR209C	YPR200C	YPR200C		YDR177W	YJL049W	YJL049W						YIL047C-A	YIL047C	YIL047C		YAL064W	YBR285W	YBR285W		YJL188C	YHL030W-A	YHL030W-A		YNL180C	YER030W	YER030W
YHR121W	YER117W	YHR121W		YKL169C	YFR052C-A	YFR052C-A		YIL111W	YLR038C	YLR038C		YNL215W	YIL098C	YIL098C						YCL023C	Q0085	Q0085		YLR438C-A	YBR090C	YBR090C		YGL188C-A	YCR003W	YCR003W		YBR157C	YKR083C	YKR083C
YGL091C	YDR381C-A	YGL091C		YBR210W	Q0160	Q0160		YCL056C	YIL111W	YIL111W		YKL082C	YLR388W	YLR388W						YJL091C	YKL163W	YKL163W		YDR022C	YDL100C	YDL100C		YKL076C	YOR020W-A	YOR020W-A		YLL067W-A	YHR050W-A	YHR050W-A
YER071C	YHR121W	YER071C		YPL117C	YBR004C	YBR004C		YNL228W	YKL009W	YKL009W		YJL049W	YOR020W-A	YOR020W-A						YLR390W-A	Q0160	Q0160		YLR068W	YHL030W-A	YHL030W-A		YOL108C	YGL088W	YGL088W		YLL066W-A	YGR018C	YGR018C
YNR024W	YNR024W	YNR024W		YBR056W	YBL018C	YBL018C		YHR060W	YJR023C	YJR023C		YGL214W	YPR187W	YPR187W						YJL219W	YMR230W-A	YMR230W-A		YOL071W	YMR118C	YMR118C		YBR278W	YCR071C	YCR071C		YFL068W	YDR201W	YDR201W
YGR183C	YOR285W	YGR183C		YFR052C-A	YJR010C-A	YJR010C-A		YLR038C	YNR032C-A	YNR032C-A		YNL228W	YLR167W	YLR167W						YDL085W	YJL105W	YJL105W		YLR311C	YDL204W	YDL204W		YHL030W-A	YKL013C	YKL013C		YPL170W	YLR053C	YLR053C
YBR166C	YGL091C	YBR166C		YGL161C	YOR293C-A	YOR293C-A		YKL009W	YMR260C	YMR260C		YGR271C-A	YJR079W	YJR079W						YCL026C-A	Q0250	Q0250		YDR199W	YLR181C	YLR181C		YGL088W	YKL097C	YKL097C		YBR230C	YBR027C	YBR027C
YKL162C-A	YDL050C	YKL162C-A		Q0160	YBL039W-B	YBL039W-B		YDR196C	YBR162W-A	YBR162W-A		YIL098C	YDL200C	YDL200C						YNL014W	YNL203C	YNL203C		YPR158W	YDR253C	YDR253C		YCR003W	YDR461C-A	YDR461C-A		YFR032C-A	YKL117W	YKL117W
YPR134W	YIR018C-A	YPR134W		YBR004C	YGL161C	YGL161C		YNR032C-A	YBL001C	YBL001C		YLR388W	YKL136W	YKL136W						YJL045W	YDR455C	YDR455C		YLR185W	YPR145C-A	YPR145C-A		YOR020W-A	YPR131C	YPR131C		YHR039C-A	YOR304C-A	YOR304C-A
YAL037C-B	YER071C	YAL037C-B		YCR018C-A	YDR003W-A	YDR003W-A		YPR200C	YDR196C	YDR196C		YOR020W-A	YHR191C	YHR191C						YJR078W	YJL175W	YJL175W		YHR028W-A	YGR259C	YGR259C		YCR071C	YCL035C	YCL035C		YLR334C	YGL041C-B	YGL041C-B
YLR147C	YGR075C	YLR147C		YJR010C-A	YBR056W	YBR056W		YJR023C	YGR034W	YGR034W		YLR167W	YJR023C	YJR023C						YLR031W	YMR303C	YMR303C		YOL099C	YDL005C	YDL005C		YKL013C	YAL055W	YAL055W		YDL099W	YDR162C	YDR162C
YER012W	YBL094C	YER012W		YBL039W-B	YIL060W	YIL060W		YHR007C-A	YPR188C	YPR188C		YPR187W	YDR529C	YDR529C						YDR537C	YGL156W	YGL156W		YDL246C	YCR013C	YCR013C		YPR131C	YDR162C	YDR162C		YFL014W	YLR102C	YLR102C
YGR075C	YGR183C	YGR075C		YBL018C	YNL336W	YNL336W		YMR260C	YBR089C-A	YBR089C-A		YHR191C	YLR038C	YLR038C						YIL165C	YLR154W-B	YLR154W-B		YML053C	YDR158W	YDR158W		YDR461C-A	YDR374W-A	YDR374W-A		YER030W	YHR059W	YHR059W
YML062C	YBR166C	YML062C		YNL336W	YJR112W-A	YJR112W-A		YPL143W	YPR002C-A	YPR002C-A		YKL136W	YOR194C	YOR194C						YLR214W	YER152W-A	YER152W-A		YBR090C	YCR020W-B	YCR020W-B		YCL035C	YOR218C	YOR218C		YBL059C-A	YER078W-A	YER078W-A
YDL050C	YPR134W	YDL050C		YOR285W	YLR285C-A	YLR285C-A		YGR034W	YLR361C-A	YLR361C-A		YDR529C	YIR024C	YIR024C						YER070W	YIL117C	YIL117C		YNL277W-A	YFL013W-A	YFL013W-A		YDR162C	YBR194W	YBR194W		YKR083C	YLR041W	YLR041W
YBL094C	YBL026W	YBL094C		YJR112W-A	YLR227C	YLR227C		YBL053W	YDL136W	YDL136W		YLR043C	YKL041W	YKL041W						YGL258W	YMR305C	YMR305C		YKL117W	YML090W	YML090W		YDR374W-A	YHR060W	YHR060W		YGR018C	YIL057C	YIL057C
YPL142C	YML062C	YPL142C		YLR227C	YDL212W	YDL212W		YBL001C	YPL143W	YPL143W		YIR024C	YLR043C	YLR043C						YIL025C	YBR134W	YBR134W		YBR269C	YER078W-A	YER078W-A		YAL055W	YOL071W	YOL071W		YHR050W-A	YCR013C	YCR013C
YBL026W	YER012W	YBL026W		YLR285C-A	YHL012W	YHL012W		YPR188C	YOR257W	YOR257W		YKL041W	YOR148C	YOR148C						YLR037C	YGR270C-A	YGR270C-A		YKR040C	YBR201W	YBR201W		YBR194W	YDR391C	YDR391C		YDR201W	YFL013W-A	YFL013W-A
YML001W	YLR147C	YML001W		YDL067C	YDL067C	YDL067C		YBR089C-A	YDR002W	YDR002W		YOR194C	YNL133C	YNL133C						YFR032C	YJL079C	YJL079C		YAL030W	YDR521W	YDR521W		YOR218C	YOR304C-A	YOR304C-A		YOR394C-A	YKR075C	YKR075C
YJL148W	YLR068W	YJL148W		YER009W	YER009W	YER009W		YLR361C-A	YDR177W	YDR177W		YDL200C	YCR075W-A	YCR075W-A						YPR174C	YNL269W	YNL269W		YGR259C	YNL081C	YNL081C		YHR060W	YML026C	YML026C		YJR140W-A	YLL041C	YLL041C
YPR109W	YML001W	YPR109W		YDL212W	YGR219W	YGR219W		YBR162W-A	YBR111W-A	YBR111W-A		YLR038C	YBR162W-A	YBR162W-A						YOR388C	YPL272C	YPL272C		YDL100C	YLR282C	YLR282C		YML026C	YLR169W	YLR169W		YLR053C	YDR445C	YDR445C
YPR046W	YJL148W	YPR046W		YIL060W	YOR285W	YOR285W		YDL136W	YOL014W	YOL014W		YJR023C	YHR121W	YHR121W						YOR034C	YJL158C	YJL158C		YBR285W	YLR285C-A	YLR285C-A		YDR391C	YLR167W	YLR167W		YKL117W	YKL018C-A	YKL018C-A
YGL161C	YPL142C	YGL161C		YGR232W	YGR232W	YGR232W		YOR257W	YML055W	YML055W		YOR148C	YDR199W	YDR199W						YMR230W-A	YDL093W	YDL093W		YDL005C	YJR118C	YJR118C		YLR167W	YHR217C	YHR217C		YOR304C-A	YOL109W	YOL109W
YPL211W	YPL211W	YPL211W		YER012W	YGR271C-A	YGR271C-A		YDR002W	YBL062W	YBL062W		YNL133C	YFR004W	YFR004W						YER065C	YIL039W	YIL039W		YLR181C	YOR282W	YOR282W		YOR304C-A	YFR049W	YFR049W		YDR162C	YMR159C	YMR159C
YLR068W	YPR109W	YLR068W		YGR219W	YMR230W-A	YMR230W-A		YDR177W	YLR460C	YLR460C		YCR075W-A	YHR051W	YHR051W						YOR084W	YHR054C	YHR054C		YMR118C	YGR146C	YGR146C		YOL071W	YGR115C	YGR115C		YGL041C-B	YLR438C-A	YLR438C-A
YDL135C	YPR046W	YDL135C		YHL012W	YER012W	YER012W		YOL014W	YIL105W-A	YIL105W-A		YHR051W	YLR408C	YLR408C						YDR455C	YLR213C	YLR213C		YHL030W-A	YMR194W	YMR194W		YLR169W	YMR315W	YMR315W		YLR102C	YGR043C	YGR043C
YDR336W	YAL037C-B	YDR336W		YDR003W-A	YML108W	YML108W		YPR002C-A	YBL112C	YBL112C		YJR079W	YJR067C	YJR067C						YKL107W	YGR032W	YGR032W		YCR013C	YDR513W	YDR513W		YMR315W	YPL185W	YPL185W		YHR059W	YNL081C	YNL081C
YGL102C	YGL161C	YGL102C		YML108W	YJR157W	YJR157W		YBR111W-A	YHR218W-A	YHR218W-A		YFR004W	YBR111W-A	YBR111W-A						YMR194C-A	YDR384C	YDR384C		YPR145C-A	YPL267W	YPL267W		YPR102C	YPR102C	YPR102C		YIL057C	YLR181C	YLR181C
YDL212W	YDL135C	YDL212W		YMR151W	YMR151W	YMR151W		YML055W	YLR043C	YLR043C		YHR121W	YIL138C	YIL138C						YBR208C	YHR139C	YHR139C		YFL013W-A	YOL077W-A	YOL077W-A		YGR115C	YHR138C	YHR138C		YCR013C	YOR282W	YOR282W
YIL103W	YIL103W	YIL103W		YGR271C-A	YNL171C	YNL171C		YLR043C	YOR293W	YOR293W		YBR162W-A	YDR051C	YDR051C						YIR040C	Q0065	Q0065		YER078W-A	YKR075C	YKR075C		YFR049W	YBR285W	YBR285W		YFL013W-A	YOR020W-A	YOR020W-A
YJL004C	YDL212W	YJL004C		YOR258W	YOR258W	YOR258W		YLR460C	YMR311C	YMR311C		YDR199W	YLR456W	YLR456W						YNL203C	YGL262W	YGL262W		YDR253C	YBL107C	YBL107C		YKL097C	YMR197C	YMR197C		YLR041W	YGL029W	YGL029W
YHR218W-A	YDR320C-A	YHR218W-A		YPR010C-A	YFR001W	YFR001W		YIL105W-A	YOR215C	YOR215C		YJR067C	YIL002W-A	YIL002W-A						YOR306C	YDL023C	YDL023C		YDL204W	YMR123W	YMR123W		YHR138C	YBL107C	YBL107C		YKR075C	YFR032C-B	YFR032C-B
YBL112C	YMR256C	YBL112C		YOR293C-A	YOL086W-A	YOL086W-A		YBL062W	YMR294W-A	YMR294W-A		YLR408C	YIL032C	YIL032C						Q0060	YHR182C-A	YHR182C-A		YDR158W	YDR031W	YDR031W		YMR197C	YDL121C	YDL121C		YLL041C	YDL068W	YDL068W
YMR256C	YDR336W	YMR256C		YMR230W-A	YNL044W	YNL044W		YOR215C	YEL003W	YEL003W		YPL186C	YPR142C	YPR142C						YCR010C	YGR139W	YGR139W		YML090W	YPR148C	YPR148C		YDL121C	YDL177C	YDL177C		YOL109W	YGR226C	YGR226C
YDR320C-A	YGL102C	YDR320C-A		YJR157W	YPR010C-A	YPR010C-A		YMR311C	YNR024W	YNR024W		YLR395C	YLR395C	YLR395C						YLR042C	YAL054C	YAL054C		YCR020W-B	YFR036W	YFR036W		YBL107C	YDR133C	YDR133C		YKL018C-A	YJR037W	YJR037W
YNL162W	YDL152W	YNL162W		YOL086W-A	YCR090C	YCR090C		YOR293W	YNL147W	YNL147W		YBR111W-A	YNL150W	YNL150W						YIL014C-A	Q0055	Q0055		YDR521W	YLR275W	YLR275W		YPL185W	YLR325C	YLR325C		YDR445C	YPR151C	YPR151C
YDR357C	YJL004C	YDR357C		YNL171C	YGL102C	YGL102C		YLR327C	YLR327C	YLR327C		YDR051C	YPL186C	YPL186C						Q0085	YPR128C	YPR128C		YNL081C	YKL018C-A	YKL018C-A		YHR217C	YML009C	YML009C		YLR438C-A	YDL204W	YDL204W
YCR097W	YAL063C-A	YCR097W		YFR001W	YCR001W	YCR001W		YNL147W	YNL110C	YNL110C		YIL138C	YPL146C	YPL146C						YIL047C	YIL160C	YIL160C		YBR201W	YDL041W	YDL041W		YDL177C	YNL162W	YNL162W		YMR159C	YBR201W	YBR201W
YHR005C-A	YCR097W	YHR005C-A		YNL044W	YLR104W	YLR104W		YMR294W-A	YKL056C	YKL056C		YLR456W	YJL031C	YJL031C						YLR307W	Q0105	Q0105		YOR282W	YHR059W	YHR059W		YBR285W	YDL224C	YDL224C		YGL029W	YNL277W-A	YNL277W-A
YLR154W-B	YDR357C	YLR154W-B		YCR090C	YDR336W	YDR336W		YLR290C	YJL179W	YJL179W		YIL002W-A	YDR016C	YDR016C						Q0160	YFL060C	YFL060C		YKL097C	YGR114C	YGR114C		YDR133C	YAR068W	YAR068W		YNL081C	YLR021W	YLR021W
YMR141C	YJL142C	YMR141C		YGL102C	YOR103C	YOR103C		YNR024W	YLR290C	YLR290C		YPR142C	YML055W	YML055W						Q0250	YDR433W	YDR433W		YLR285C-A	YMR315W	YMR315W		YNL162W	YJL171C	YJL171C		YGR043C	YBR089C-A	YBR089C-A
YDR196C	YGR271C-A	YDR196C		YLR104W	YGR106C	YGR106C		YEL003W	YGR063C	YGR063C		YNL150W	YHR141C	YHR141C						YGR270C-A	YJR095W	YJR095W		YLR282C	YIR017C	YIR017C		YLR325C	YLR416C	YLR416C		YLR181C	YIL142C-A	YIL142C-A
YOR143C	YMR141C	YOR143C		YGR106C	YML001W	YML001W		YKL056C	YNL070W	YNL070W		YJL031C	YJL032W	YJL032W						YJL175W	YNL033W	YNL033W		YJR118C	YGR018C	YGR018C		YML009C	YOR084W	YOR084W		YOR282W	YGL152C	YGL152C
YDL152W	YNL162W	YDL152W		YML001W	YIL139C	YIL139C		YJL179W	YDL200C	YDL200C		YDR016C	YDR513W	YDR513W						YNL269W	YHR032W-A	YHR032W-A		YKR075C	YBR122C	YBR122C		YIL060W	YER172C-A	YER172C-A		YML084W	YGR142W	YGR142W
YOR312C	YHR005C-A	YOR312C		YDR336W	YMR141C	YMR141C		YFR003C	YFR003C	YFR003C		YDR513W	YFL017W-A	YFL017W-A						YKL163W	YBR291C	YBR291C		YGR146C	YKR083C	YKR083C		YGR242W	YHR131W-A	YHR131W-A		YFR032C-B	YLR275W	YLR275W
YGR271C-A	YJR010C-A	YGR271C-A		YIL139C	YJL004C	YJL004C		YNL110C	YBL039W-B	YBL039W-B		YPL146C	YKL172W	YKL172W						YBR134W	Q0275	Q0275		YMR194W	YKR085C	YKR085C		YBR076W	YBR235W	YBR235W		YBR027C	YHR152W	YHR152W
YOR167C	YDR302W	YOR167C		YOR103C	YIL008W	YIL008W		YBL039W-B	YLR421C	YLR421C		YJL032W	YCR082W	YCR082W						YMR303C	YPR001W	YPR001W		YBL107C	YOR198C	YOR198C		YHR214W	YOR291W	YOR291W		YOR020W-A	YKL091C	YKL091C
YDR302W	YOR143C	YDR302W		YJL004C	YDR381C-A	YDR381C-A		YGR063C	YGR135W	YGR135W		YHR141C	YGR135W	YGR135W						YJL105W	YFL067W	YFL067W		YOL077W-A	YOR041C	YOR041C		YEL073C	Q0060	Q0060		YDL068W	YMR118C	YMR118C
YJR010C-A	YOR312C	YJR010C-A		YDR381C-A	YER142C	YER142C		YLR076C	YDR034C-A	YDR034C-A		YML055W	YLR284C	YLR284C						YGL156W	YJR150C	YJR150C		YDR513W	YPL094C	YPL094C		YOR192C	YDL093W	YDL093W		YER078W-A	YDL002C	YDL002C
YCR039C	YDR196C	YCR039C		YMR141C	YEL072W	YEL072W		YLR421C	YER074W-A	YER074W-A		YKL067W	YKL067W	YKL067W						YER152W-A	Q0045	Q0045		YGR114C	YKL097C	YKL097C		YIL153W	YOR034C	YOR034C		YPR151C	YMR194W	YMR194W
YCL067C	YLR456W	YCL067C		YCR001W	YMR211W	YMR211W		YDL200C	YFR004W	YFR004W		YLR284C	YCL058C	YCL058C						YGR139W	YLR157W-D	YLR157W-D		YMR123W	YGR082W	YGR082W		YMR119W-A	YNL028W	YNL028W		YJR037W	YNL174W	YNL174W
YIR018C-A	YLL042C	YIR018C-A		YER142C	YKL174C	YKL174C		YNL070W	YLR076C	YLR076C		YFL017W-A	YER002W	YER002W						YIL117C	YIL123W	YIL123W		YPR148C	YFR001W	YFR001W		YHR218W	YJL175W	YJL175W		YBR201W	YJL131C	YJL131C
YJL142C	YFR052C-A	YJL142C		YOR369C	YOR369C	YOR369C		YGR135W	YDR512C	YDR512C		YGR135W	YPR010C-A	YPR010C-A						YLR466W	YJL135W	YJL135W		YKL018C-A	YDL002C	YDL002C		YOR055W	Q0105	Q0105		YDL204W	YGR114C	YGR114C
YFR052C-A	YCL067C	YFR052C-A		YEL072W	YNR061C	YNR061C		YGR243W	YHR010W	YHR010W		YCR082W	YMR251W-A	YMR251W-A						YML133C	YLR307C-A	YLR307C-A		YFR036W	YKL118W	YKL118W		YHL012W	YMR279C	YMR279C		YLR021W	YDL244W	YDL244W
YLL042C	YCR039C	YLL042C		YKL174C	YNL146C-A	YNL146C-A		YFR004W	YGR243W	YGR243W		YKL172W	YOR159C	YOR159C						YJL079C	YPL200W	YPL200W		YDR031W	YMR159C	YMR159C		YDL220C	YPR116W	YPR116W		YBR089C-A	YGL214W	YGL214W
YLR456W	YCL048W-A	YLR456W		YIL008W	YER187W	YER187W		YDR512C	YPL146C	YPL146C		YCL058C	YMR260C	YMR260C						YLR154W-B	YPL036W	YPL036W		YDL041W	YDR201W	YDR201W		YOL011W	YNR067C	YNR067C		YIL142C-A	YLR025W	YLR025W
YER126C	YER126C	YER126C		YMR211W	YKL001C	YKL001C		YHR010W	YLR408C	YLR408C		YPR010C-A	YDL007W	YDL007W						YMR305C	YJL195C	YJL195C		YLR275W	YMR294W	YMR294W		YPR128C	YCR025C	YCR025C		YNL277W-A	YML098W	YML098W
YKR068C	YOR167C	YKR068C		YNR061C	YKL021C	YKL021C		YER074W-A	YER133W	YER133W		YMR251W-A	YDR167W	YDR167W						YPL272C	YOR139C	YOR139C		YHR059W	YLL041C	YLL041C		YNL202W	YJL195C	YJL195C		YGR226C	YBL028C	YBL028C
YGR024C	YML108W	YGR024C		YER187W	YOL124C	YOL124C		YLR408C	YLR154W-F	YLR154W-F		YER002W	YDL067C	YDL067C						YGL262W	YHR165W-A	YHR165W-A		YPL267W	YIR019C	YIR019C		YIL134C-A	YOR378W	YOR378W		YGL152C	YLR218C	YLR218C
YDR399W	YLR154W-B	YDR399W		YKL001C	YMR007W	YMR007W		YDR034C-A	YHR001W-A	YHR001W-A		YMR260C	YOR052C	YOR052C						YJL158C	YIL105W-A	YIL105W-A		YGR018C	YLR395C	YLR395C		YMR063W	YPR054W	YPR054W		YGR142W	YDR163W	YDR163W
YAL063C-A	YGR024C	YAL063C-A		YJR058C	YPL080C	YPL080C		YER133W	YGR105W	YGR105W		YDL007W	YCR041W	YCR041W						YIL039W	YHR125W	YHR125W		YIR019C	YLR025W	YLR025W		YJL219W	YGL028C	YGL028C		YLR275W	YLR395C	YLR395C
YML108W	YIL139C	YML108W		YDR196C	YNR024W	YNR024W		YPL146C	YOR312C	YOR312C		YOR159C	YOR199W	YOR199W						YDL093W	YHR126C	YHR126C		YOL161C	YKL013C	YKL013C		YCR048W	YIL108W	YIL108W		YHR152W	YPR102C	YPR102C
YLR264W	YKR068C	YLR264W		YNR024W	YKR074W	YKR074W		YLR154W-F	YAL059W	YAL059W		YDR167W	YKL160W	YKL160W						YHR182C-A	YEL075W-A	YEL075W-A		YBR122C	YML098W	YML098W		Q0085	YPL272C	YPL272C		YDL002C	YAR030C	YAR030C
YLR242C	YDR399W	YLR242C		YKL021C	YDL160C-A	YDL160C-A		YHR001W-A	YKR074W	YKR074W		YOR052C	YDL099W	YDL099W						YLR213C	YOR161C-C	YOR161C-C		YMR315W	YNL215W	YNL215W		YHR213W	YIL047C	YIL047C		YNL174W	YIR017C	YIR017C
YIL139C	YLR361C-A	YIL139C		YBL036C	YBL036C	YBL036C		YOR312C	YOR159C	YOR159C		YKL160W	YDL172C	YDL172C						YHR054C	YLR462W	YLR462W		YFR001W	YER172C-A	YER172C-A		YDL242W	YFL011W	YFL011W		YKL091C	YJR023C	YJR023C
YER158W-A	YLR264W	YER158W-A		YKR074W	YJR058C	YJR058C		YBR062C	YOR148C	YOR148C		YCR041W	YMR294W	YMR294W						YDR384C	YER014C-A	YER014C-A		YKR083C	YER043C	YER043C		YFL061W	YHL049C	YHL049C		YMR118C	YDR014W-A	YDR014W-A
YLR043C	YER158W-A	YLR043C		YGR024C	YGR024C	YGR024C		YKR074W	YBR062C	YBR062C		YDL067C	YDR373W	YDR373W						YHR139C	YDR545C-A	YDR545C-A		YOR198C	YEL032W	YEL032W		YCL023C	YOR300W	YOR300W		YMR194W	YBR122C	YBR122C
YLR265C	YLR242C	YLR265C		YDL236W	YFL017W-A	YFL017W-A		YGR105W	YIL002W-A	YIL002W-A		YDL099W	YOR102W	YOR102W						YGR032W	YLR062C	YLR062C		YDL002C	YMR303C	YMR303C		YGR199W	YDL094C	YDL094C		YJL131C	YPL064C	YPL064C
YLR361C-A	YLR285C-A	YLR361C-A		YOL124C	YMR130W	YMR130W		YOR148C	YHR049C-A	YHR049C-A		YOR199W	YOR094W	YOR094W						Q0065	YLR061W	YLR061W		YIR017C	YKL004W	YKL004W		YLR234W	YCL026C-A	YCL026C-A		YGR114C	YIR019C	YIR019C
YGR169C-A	YGR169C-A	YGR169C-A		YFL017W-A	YDR196C	YDR196C		YAL059W	YOR265W	YOR265W		YDR373W	YER142C	YER142C						YDL023C	YKR040C			YOR041C	YEL071W	YEL071W		YNR041C	YOR391C	YOR391C		YGL214W	YKL123W	YKL123W
YLR285C-A	YBL049W	YLR285C-A		YMR007W	YER002W	YER002W		YOR159C	YNL122C	YNL122C		YMR294W	YMR028W	YMR028W						YAL047W-A	YMR197C			YKL118W	YHL016C	YHL016C		YNR075W	YNL269W	YNL269W		YBL028C	YPR131C	YPR131C
YBL049W	YNL205C	YBL049W		YPL080C	YDL236W	YDL236W		YOR265W	YDR167W	YDR167W		YOR102W	YDR079C-A	YDR079C-A						YAL054C	YOR218C			YKR085C	YLR120C	YLR120C		YKL068W	YIL039W	YIL039W		YLR025W	YIL063C	YIL063C
YCL048W-A	YBL062W	YCL048W-A		YPR130C	YLL042C	YLL042C		YBL112C	YKL082C	YKL082C		YDL172C	YOR369C	YOR369C						YFL067W	YGR115C			YPL094C	YER056C	YER056C		YJL079C	Q0275	Q0275		YML098W	YBL107C	YBL107C
YGR106C	YLR043C	YGR106C		YNL146C-A	YPR130C	YPR130C		YHR218W-A	YDR079W	YDR079W		YOR094W	YOR277C	YOR277C						Q0055	YDR162C			YGR082W	YDR215C	YDR215C		YPL184C	YML031C-A	YML031C-A		YPR102C	YCL035C	YCL035C
YBL062W	YLR265C	YBL062W		YDL157C	YDL157C	YDL157C		YDR079W	YDR471W	YDR471W		YOR277C	YKR014C	YKR014C						YIL160C	YJL009W			YMR159C	YEL046C	YEL046C		YDL224C	YPL119C-A	YPL119C-A		YLR218C	YJR118C	YJR118C
YJL136C	YDL160C-A	YJL136C		YBR159W	YMR256C	YMR256C		YDR471W	YLR010C	YLR010C		YER142C	YJR005C-A	YJR005C-A						YHR032C-A	YKL156W			YMR294W	YOR084W	YOR084W		YAR068W	YDR384C	YDR384C		YDR163W	YOL013W-A	YOL013W-A
YLR262C	YGR106C	YLR262C		YER002W	YBR159W	YBR159W		YIL002W-A	YJL011C	YJL011C		YOR369C	YLR145W	YLR145W						YPR128C	YML036W			YDR201W	YHR054C	YHR054C		YLR416C	YER152W-A	YER152W-A		YDL244W	YDR067C	YDR067C
YJR057W	YJL136C	YJR057W		YMR130W	YGL159W	YGL159W		YML024W	YGL102C	YGL102C		YMR028W	YDR532C	YDR532C						YFL060C	YAR030C			YIL032C	YEL049W	YEL049W		YER172C-A	YDR095C	YDR095C		YLR395C	YER121W	YER121W
YEL072W	YLR262C	YEL072W		YGR034W	YGR034W	YGR034W		YDR167W	YDR079C-A	YDR079C-A		YKR014C	YDR201W	YDR201W						Q0105	YMR077C			YLL041C	YER044C	YER044C		YJL171C	YLR235C	YLR235C		YIR019C	YDL169C	YDL169C
YPL273W	YPL273W	YPL273W		YMR256C	YDR302W	YDR302W		YNL122C	YKL041W	YKL041W		YDR079C-A	YNL110C	YNL110C						YJR095W	YDR199W			YLR395C	YBR046C	YBR046C		YHR131W-A	YBR220C	YBR220C		YAR030C	YCR020W-B	YCR020W-B
YGR209C	YJR057W	YGR209C		YLL042C	YCR097W	YCR097W		YGR106C	YML024W	YML024W		YDR532C	YKL118W	YKL118W						YNL033W	YBL107C			YLR025W	YMR035W	YMR035W		YOR084W	YPL278C	YPL278C		YJR023C	YMR269W	YMR269W
YOR277C	YLR051C	YOR277C		YGL159W	YNR020C	YNR020C		YKL082C	YGR106C	YGR106C		YLR145W	YGL103W	YGL103W						YBR291C	YOR215C			YML098W	YJL134W	YJL134W		YBR235W	YKL102C	YKL102C		YIR017C	YJR096W	YJR096W
YOR159C	YLR042C	YOR159C		YDR302W	YLR078C	YLR078C		YOR020W-A	YOR020W-A	YOR020W-A		YPR098C	YIL029C	YIL029C						YDR433W	YDR253C			YKL013C	YER091C	YER091C		YNL028W	YAR060C	YAR060C		YDR014W-A	YDL172C	YDL172C
YCR018C	YOR277C	YCR018C		YCR097W	YDR031W	YDR031W		YLR010C	YOL086W-A	YOL086W-A		YGL103W	YDL085C-A	YDL085C-A						YHR032W-A	YBR278W			YNL215W	YHL040C	YHL040C		YOR291W	YHR212C	YHR212C		YBR122C	YDL062W	YDL062W
YDL160C-A	YOR159C	YDL160C-A		YDL160C-A	YIL110W	YIL110W		YGL102C	YHR191C	YHR191C		YKL118W	YPR098C	YPR098C						YJR150C	YPR167C			YHR215W	YBL042C	YBL042C		Q0060	YOR376W-A	YOR376W-A		YPL064C	YBR147W	YBR147W
YNL067W	YEL072W	YNL067W		YDR031W	YHL022C	YHL022C		YDR079C-A	YKL137W	YKL137W		YDR201W	YGR222W	YGR222W						Q0275	YKL062W			YHL047C	YER099C	YER099C		YDL093W	YOR387C	YOR387C		YIL063C	YNL136W	YNL136W
YJR141W	YGR209C	YJR141W		YLR078C	YNL141W	YNL141W		YKL041W	YGR035C	YGR035C		YIL029C	YPR132W	YPR132W						YPR001W	YDR158W			YLR121C	YMR238W	YMR238W		YOR034C	YPL200W	YPL200W		YKL123W	YBR162W-A	YBR162W-A
YER133W	YCR018C	YER133W		YIL110W	YNL070W	YNL070W		YJL011C	YPR134W	YPR134W		YNL110C	YMR150C	YMR150C						YLR157W-D	YEL051W			YOR153W	YOR169C	YOR169C		YJL175W	YDR157W	YDR157W		YPR131C	YOR281C	YOR281C
YDR374W-A	YCR090C	YDR374W-A		YNR020C	YPL271W	YPL271W		YHR191C	YOR094W	YOR094W		YGR222W	YLR200W	YLR200W						Q0045	YHR060W			YDR215C	YCL038C	YCL038C		Q0105	YOR345C	YOR345C		YBL107C	YDR460W	YDR460W
YLR080W	YLL055W	YLR080W		YER067C-A	YOR143C	YOR143C		YOR094W	YKL196C	YKL196C		YPR132W	YGR106C	YGR106C						YIL123W	YOR276W			YBR005W	YFR032C	YFR032C		YCR025C	YJR150C	YJR150C		YCL035C	YGR053C	YGR053C
YCR090C	YBR085C-A	YCR090C		YPL271W	YDR447C	YDR447C		YOL086W-A	YOR261C	YOR261C		YMR150C	YFR036W-A	YFR036W-A						YJL135W	YLR466C-A			YNR041C	YGL235W	YGL235W		YMR279C	YDR215C	YDR215C		YJR118C	YDL091C	YDL091C
YER019C-A	YBR004C	YER019C-A		YDR447C	YKL136W	YKL136W		YKL137W	YDL092W	YDL092W		YDL085C-A	YBL062W	YBL062W						YPR076W	YLR467C-A			YNL202W	Q0060	Q0060		YPR116W	YDL034W	YDL034W		YMR269W	YKL193C	YKL193C
YBR004C	YER133W	YBR004C		YHR136C	YHR136C	YHR136C		YHR049C-A	YMR284W	YMR284W		YGR106C	YPR200C	YPR200C						YLR307C-A	YOR396C-A			YGR138C	YBR295W	YBR295W		YNR067C	YBR178W	YBR178W		YDR067C	YMR173W	YMR173W
YLL055W	YDR374W-A	YLL055W		YKL136W	YDR319C	YDR319C		YPR134W	YML030W	YML030W		YLR200W	YJL179W	YJL179W						YHL046C	YPL186C			YHR042W	YLR031W	YLR031W		YJL195C	YGL262W	YGL262W		YCR020W-B	YPL013C	YPL013C
YLR051C	YJR141W	YLR051C		YOR143C	YPR087W	YPR087W		YGR035C	YDR008C	YDR008C		YDR079W	YDR079W	YDR079W						YPL200W	YEL018C-A			YJL172W	YNL142W	YNL142W		YPR054W	YNL203C	YNL203C		YER121W	YKL097C	YKL097C
YLR042C	YER019C-A	YLR042C		YDL115C	YML022W	YML022W		YML030W	YOR121C	YOR121C		YFR036W-A	YLR262C	YLR262C						YGL260W	YGL058W			YER172C-A	YHR130C	YHR130C		YOR378W	YBR134W	YBR134W		YDL169C	YLR154W-F	YLR154W-F
YBR085C-A	YDR051C	YBR085C-A		YNL070W	YHR005C-A	YHR005C-A		YOR261C	YLR252W	YLR252W		YPR200C	YKL196C	YKL196C						YNL339C	YNL122C			YMR122W-A	YER017C	YER017C		YGL028C	YHR032W-A	YHR032W-A		YIL032C	YLR327C	YLR327C
YJL031C	YNL067W	YJL031C		YPR087W	YDL115C	YDL115C		YKL196C	YKL058W	YKL058W		YJL179W	YKL137W	YKL137W						YEL030C-A	YGR035C			YPL017C	YLR034C	YLR034C		YDR455C	YDR360W	YDR360W		YDL062W	YBR084C-A	YBR084C-A
YDR051C	YJL031C	YDR051C		YML022W	YER067C-A	YER067C-A		YDL092W	YNL155W	YNL155W		YAL016C-B	YOR006C	YOR006C						YAL068W-A	YOL077W-A			YGR014W	YMR194C-A	YMR194C-A		YIL108W	YIL165C	YIL165C		YDL172C	YPL267W	YPL267W
YBR154C	YBR154C	YBR154C		YJL031C	YJL031C	YJL031C		YLR252W	YGR228W	YGR228W		YLR262C	YFR052C-A	YFR052C-A						YNL097C-B	YEL034C-A			YDR242W	YDL016C	YDL016C		YPL272C	YJR086W	YJR086W		YJR096W	YBR278W	YBR278W
YOR289W	YDR003W-A	YOR289W		YHR005C-A	YLR008C	YLR008C		YMR284W	YDL007W	YDL007W		YFR052C-A	YBR089C-A	YBR089C-A						YPL036W	YML101C			YMR008C	YIL039W	YIL039W		YKR032W	YPR123C	YPR123C		YNL136W	YGR253C	YGR253C
YNL205C	YAL059W	YNL205C		YNL141W	YNL057W	YNL057W		YKL058W	YJR067C	YJR067C		YIL032C	YBR290W	YBR290W						YPR160C-A	YMR158W-B			YDR481C	YEL040W	YEL040W		YAL063C-A	Q0160	Q0160		YBR147W	YDL065C	YDL065C
YKL174C	YKL174C	YKL174C		YHL022C	YBL062W	YBL062W		YDR008C	YOL108C	YOL108C		YBR089C-A	YDR379C-A	YDR379C-A						YAR020C	YMR158W			Q0050	YIR018C-A	YIR018C-A		YIL047C	Q0075	Q0075		YOR281C	YDR281C	YDR281C
YBR024W	YLR080W	YBR024W		YDR319C	YEL020W-A	YEL020W-A		YOR121C	YLR294C	YLR294C		YOR006C	YKL009W	YKL009W						YJL195C	YHR071W			YER144C	YJR078W	YJR078W		YOR300W	Q0065	Q0065		YBR162W-A	YDR513W	YDR513W
YNL038W	YNL038W	YNL038W		YLR008C	YBR154C	YBR154C		YJR067C	YPR020W	YPR020W		YKL196C	YNL149C	YNL149C						YOR139C	YCR003W			YGL235W	YMR084W	YMR084W		YDL094C	YOR169C	YOR169C		YDR460W	YLR119W	YLR119W
YOR258W	YOR258W	YOR258W		YBR154C	YDR370C	YDR370C		YNL155W	YDR133C	YDR133C		YBL062W	YIL014C-A	YIL014C-A						YHR165W-A	YDL005C			YER043C	YER113C	YER113C		YHL049C	YLR037C	YLR037C		YLR154W-F	YIR024C	YIR024C
YOR182C	YBR024W	YOR182C		YDR370C	YBL026W	YBL026W		YPR020W	YLR435W	YLR435W		YKL137W	YFL046W	YFL046W						YEL075W-A	YBR122C			YIR018C-A	YJL135W	YJL135W		YFL011W	YOR105W	YOR105W		YDL091C	YBR285W	YBR285W
YAL059W	YKL006C-A	YAL059W		YPL142C	YPL237W	YPL237W		YDL007W	YGR064W	YGR064W		YFL046W	YBR085C-A	YBR085C-A						YHR126C	YML026C			YEL049W	YLR342W-A	YLR342W-A		YOR391C	YGL217C	YGL217C		YKL193C	YMR114C	YMR114C
YLR421C	YGR222W	YLR421C		YPL237W	YMR065W	YMR065W		YLR294C	YDR288W	YDR288W		YKL009W	YBR154C	YBR154C						YHR125W	YLR438C-A			YEL032W	YBR056C-B	YBR056C-B		YCL026C-A	YLR342W-A	YLR342W-A		YGR053C	YOR198C	YOR198C
YGR222W	YGR131W	YGR222W		YBL062W	YER126C	YER126C		YDR133C	YGL030W	YGL030W		YGR053C	YPR102C	YPR102C						YLR462W	YPL094C			YMR303C	YBR134W	YBR134W		YNL269W	YHR125W	YHR125W		YOL013W-A	YPR148C	YPR148C
YGR232W	YOR289W	YGR232W		YEL020W-A	YPL142C	YPL142C		YGL030W	YCR041W	YCR041W		YPR102C	YGR053C	YGR053C						YIL105W-A	YDR031W			YHR130C	YER070W	YER070W		YML031C-A	YNL033W	YNL033W		YPL013C	YPL108W	YPL108W
YGL030W	YOR182C	YGL030W		YBL026W	YMR260C	YMR260C		YGR064W	YDR051C	YDR051C		YBR290W	YLR294C	YLR294C						YER085C	YNL228W			YKL004W	YBR093C	YBR093C		YIL039W	YDR433W	YDR433W		YMR173W	YDL121C	YDL121C
YER046W-A	YLR038C	YER046W-A		YMR065W	YGR141W	YGR141W		YOL108C	YJL031C	YJL031C		YIL014C-A	YDR288W	YDR288W						YOR161C-C	YPR143W			YER044C	YER011W	YER011W		YJL015C	YAL065C	YAL065C		YBR084C-A	YIL138C	YIL138C
YCR028C-A	YLR421C	YCR028C-A		YGR141W	YJR141W	YJR141W		YDR288W	YPL013C	YPL013C		YBR154C	YDL115C	YDL115C						YOR231C-A	YPR150W			YDR535C	YBR220C	YBR220C		Q0275	YIR020C	YIR020C		YLR327C	YMR294W	YMR294W
YOL129W	YCR028C-A	YOL129W		YMR260C	YER186C	YER186C		YGR228W	YPL117C	YPL117C		YLR294C	YGR118W	YGR118W						YER023C-A	YDL177C			YHL016C	YPR123C	YPR123C		YGR270C-A	YHR032C-A	YHR032C-A		YBR278W	YML026C	YML026C
YLR038C	YKL065W-A	YLR038C		YER126C	YCL067C	YCL067C		YJL031C	YDL158C	YDL158C		YDR379C-A	YDR316W	YDR316W						YDR464C-A	YOR216C			YER056C	YBL083C	YBL083C		YPL119C-A	YJL156W-A	YJL156W-A		YPL267W	YPR158W	YPR158W
YBR062C	YPR002C-A	YBR062C		YCR039C	YCR039C	YCR039C		YLR435W	YCR024C-B	YCR024C-B		YBR085C-A	YPL096W	YPL096W						YER014C-A	YJR050W			YEL071W	YKL163W	YKL163W		YCR081C-A	YAL037C-B	YAL037C-B		YGR253C	YCR071C	YCR071C
YHR012W	YGR232W	YHR012W		YCL067C	YPR166C	YPR166C		YPL013C	YHR005C-A	YHR005C-A		YNL149C	YML026C	YML026C						YLL067C	YNR032C-A			YOR169C	YIL059C	YIL059C		YDR095C	YFL067W	YFL067W		YDL065C	YKL076C	YKL076C
YKL065W-A	YER046W-A	YKL065W-A		YJR141W	YDR413C	YDR413C		YCR041W	YDR199W	YDR199W		YDR288W	YNL114C	YNL114C						YLR062C	YER088C-A			YEL046C	YDR384C	YDR384C		YIR018C-A	YNL205C	YNL205C		YDR281C	YDL021W	YDL021W
YDL009C	YHR012W	YDL009C		YER099C	YLR400W	YLR400W		YDR051C	YER112W	YER112W		YDL115C	YPR002C-A	YPR002C-A						YDR545C-A	YGR253C			YOR084W	YHR032W-A	YHR032W-A		YOR376W-A	YOR139C	YOR139C		YLR119W	YPR133C	YPR133C
YPR002C-A	YBR062C	YPR002C-A		YNR034W-A	YER099C	YER099C		YHR005C-A	YDR320C-A	YDR320C-A		YPL096W	YOR021C	YOR021C						YLR061W	YCR071C			YFR032C	Q0065	Q0065		YDR384C	YIL163C	YIL163C		YDR513W	YGR167W	YGR167W
YML063W	YBR129C	YML063W		YER186C	YBR085C-A	YBR085C-A		YCR024C-B	YKR085C	YKR085C		YDR316W	YOR210W	YOR210W										YHR069C-A	YDR502C	YDR502C		YER152W-A	YIR013C	YIR013C		YIR024C	YOR174W	YOR174W
YGR131W	YGL030W	YGR131W		YBR085C-A	YHR148W	YHR148W		YKL067W	YCR003W	YCR003W		YGR118W	YOL108C	YOL108C										YLR120C	YHL049C	YHL049C		YLR235C	YPR076W	YPR076W		YOR198C	YKL118W	YKL118W
YBR129C	YIL014W	YBR129C		YOR089C	YOR089C	YOR089C		YPL117C	YNL153C	YNL153C		YJR005C-A	YNL155W	YNL155W										YPR123C	YNL044W	YNL044W		YPL278C	YPR160C-A	YPR160C-A		YMR114C	YCR003W	YCR003W
YPL220W	YDL009C	YPL220W		YPR166C	YMR157C	YMR157C		YLR395C	YMR077C	YMR077C		YOR021C	YOR261C	YOR261C										YLR342W-A	YIL047C	YIL047C		YKL102C	YGL261C	YGL261C		YPR148C	YOL108C	YOL108C
YIL014W	YLR010C	YIL014W		YLR441C	YML062C	YML062C		YDL158C	YKL018C-A	YKL018C-A		YML026C	YIL161W	YIL161W										YHL040C	YMR141W-A	YMR141W-A		YHR212C	YER014C-A	YER014C-A		YPL108W	YFR008W	YFR008W
YHR010W	YML063W	YHR010W		YMR157C	YEL017C-A	YEL017C-A		YER112W	YJL142C	YJL142C		YIL161W	YBL077W	YBL077W										YHR054C	YGL226C-A	YGL226C-A		YAR060C	YFL065C	YFL065C		YDL121C	YDR379C-A	YDR379C-A
YKL006C-A	YOL129W	YKL006C-A		YML062C	YLR051C	YLR051C		YDR199W	YDR328C	YDR328C		YNL114C	YPL090C	YPL090C										YMR194C-A	YLL055W	YLL055W		YBR220C	YDR442W	YDR442W		YIL138C	YPL123C	YPL123C
YKL033W-A	YPL220W	YKL033W-A		YLR400W	YNR034W-A	YNR034W-A		YMR077C	YLR456W	YLR456W		YOR210W	YAL025C	YAL025C										YBR046C	YJL156W-A	YJL156W-A		YHR165W-A	YGR139W	YGR139W		YMR294W	YLR068W	YLR068W
YDR288W	YKL033W-A	YDR288W		YER133W	YNL100W	YNL100W		YNL153C	YHR180W-A	YHR180W-A		YOL108C	YHR072W-A	YHR072W-A										YBL042C	YOR306C	YOR306C		YLR347W-A	YAR064W	YAR064W		YML026C	YLR257W	YLR257W
YLR166C	YJL179W	YLR166C		YHR148W	YLR301W	YLR301W		YDR320C-A	YLR287C-A	YLR287C-A		YOR261C	YCR003W	YCR003W										YMR035W	YEL042W	YEL042W		YOR387C	YIR040C	YIR040C		YBR285W	YDR521W	YDR521W
YDL007W	YLR166C	YDL007W		YLR301W	YER133W	YER133W		YCR003W	YDL069C	YDL069C		YNL155W	YBR258C	YBR258C										YOR381W-A	YDL210W	YDL210W		YDR157W	YLR462W	YLR462W		YKL097C	YAL030W	YAL030W
YJL055W	YHR010W	YJL055W		YNL100W	YLR441C	YLR441C		YJL142C	YLR395C	YLR395C		YPL090C	YFR010W-A	YFR010W-A										YBR134W	YER152W-A	YER152W-A		YPL200W	YHL046C	YHL046C		YCR071C	YJL189W	YJL189W
YPR087W	YKL021C	YPR087W		YDR413C	YDR157W	YDR157W		YDR328C	YKL067W	YKL067W		YEL012W	YEL012W	YEL012W										YDL016C	YIL123W	YIL123W		YHR069C-A	YFL064C	YFL064C		YKL076C	YDR469W	YDR469W
YBL040C	YPR087W	YBL040C		YHR121W	YHR121W	YHR121W		YHL015W	YCL058C	YCL058C		YPR002C-A	YOR182C	YOR182C										YAL047W-A	YMR305C	YMR305C		YOR345C	YDR545C-A	YDR545C-A		YPR158W	YMR028W	YMR028W
YLR010C	YDR288W	YLR010C		YDR327W	YDR327W	YDR327W		YKR085C	YJR082C	YJR082C		YBR258C	YOR075W	YOR075W										YJL134W	YIL117C	YIL117C		YDR215C	YEL075W-A	YEL075W-A		YPR133C	YPL238C	YPL238C
YGL220W	YBL040C	YGL220W		YEL017C-A	YLR279W	YLR279W		YHL034W-A	YER159C	YER159C		YOR167C	YOR167C	YOR167C										YCL038C	YNL192W	YNL192W		YJR150C	YFL034C-A	YFL034C-A		YDL021W	YLR290C	YLR290C
YJL179W	YGL220W	YJL179W		YLR051C	YIL156W-B	YIL156W-B		YER044C	YFR010W-A	YFR010W-A		YBL077W	YGR115C	YGR115C										YER091C	YPL111W	YPL111W		YDL034W	YDL247W	YDL247W		YOR174W	YLR165C	YLR165C
YPL237W	YPL237W	YPL237W		YIL156W-B	YBR104W	YBR104W		YHR180W-A	YER044C	YER044C		YOR182C	YMR077C	YMR077C										Q0060	YLL058W	YLL058W		YBR178W	YKR085C			YGR167W	YOL054W	YOL054W
YLR390W-A	YMR107W	YLR390W-A		YGR046W	YGR046W	YGR046W		YKL018C-A	YBR210W	YBR210W		YFR010W-A	YOL002C	YOL002C										YMR238W	YBR291C	YBR291C		YGL262W	YEL018C-A			YCR003W	YKL067W	YKL067W
YKL021C	YGL170C	YKL021C		YBR104W	YLR050C	YLR050C		YLR456W	YER050C	YER050C		YCR003W	YNR020C	YNR020C										YLR031W	YGR270C-A	YGR270C-A		YBR134W	YPL238C			YLR068W	YPL052W	YPL052W
YKL009W	YDL007W	YKL009W		YLR251W	YDR320C-A	YDR320C-A		YLR287C-A	YHL034W-A	YHL034W-A		YHR072W-A	YDR002W	YDR002W										YNL142W	YNL205C	YNL205C		YNL203C	YDL002C			YOL108C	YKL198C	YKL198C
YMR107W	YBR201C-A	YMR107W		YLR050C	YLR251W	YLR251W		YDL069C	YHL015W	YHL015W		YOR075W	YGR129W	YGR129W										YER099C	YDR055W	YDR055W		YHR032W-A	YBR122C			YKL118W	YMR069W	YMR069W
YGL170C	YKL009W	YGL170C		YNL057W	YDR167W	YDR167W		YFR010W-A	YML009C-A	YML009C-A		YAL025C	YLR460C	YLR460C										YJL135W	YLR390W-A	YLR390W-A		YJR086W	YOR276W			YFR008W	YDL094C	YDL094C
YMR230W	YJL055W	YMR230W		YDR357C	YOR298W	YOR298W		YBR210W	YER117W	YER117W		YGR115C	YCL048W	YCL048W										YBR295W	YBR076W	YBR076W		YPR123C	YDR521W			YJL189W	YLL064C	YLL064C
YBR201C-A	YLR390W-A	YBR201C-A		YDR167W	YDL050C	YDL050C		YJR082C	YGL020C	YGL020C		YMR077C	YLR367W	YLR367W										YER017C	YER184C	YER184C		YDR360W	YDL041W			YPL238C	YNR076W	YNR076W
YPL095C	YBR302C	YPL095C		YDR320C-A	YDR357C	YDR357C		YCL058C	YKL172W	YKL172W		YBL039W-B	YBL039W-B	YBL039W-B										YIL039W	YGR032W	YGR032W		YIL165C	YER158W-A			YLR257W	YOR203W	YOR203W
YML132W	YML132W	YML132W		YDL050C	YJR057W	YJR057W		YGL020C	YNL079C	YNL079C		YLR460C	YKR074W	YKR074W										YBR056C-B	YOR170W	YOR170W		Q0160	YER058W			YDR379C-A	YER070W	YER070W
YBR302C	YPL095C	YBR302C		YGR064W	YDL166C	YDL166C		YHR051W	YML026C	YML026C		YDR002W	YDR381C-A	YDR381C-A										YLR034C	YDR433W	YDR433W		Q0075	YML098W			YDR521W	YPL017C	YPL017C
YOR293W	YMR230W	YOR293W		YJR057W	YDL152W	YDL152W		YER159C	YPL170W	YPL170W		YGR129W	YDL219W	YDL219W										YBL083C	YEL065W	YEL065W		YOR169C	YPL183W-A			YPL123C	YER089C	YER089C
YJL189W	YPR166C	YJL189W		YDL166C	YGR064W	YGR064W		YER117W	YLR221C	YLR221C		YOL002C	YLR221C	YLR221C										YJR078W	YML058W-A	YML058W-A		Q0065	YBR201W			YMR028W	YIL060W	YIL060W
YMR065W	YDR374C	YMR065W		YOR298W	YJL171C	YJL171C		YER050C	YBR290W	YBR290W		YNR020C	YBR201C-A	YBR201C-A										YEL040W	YPL200W	YPL200W		YLR037C	YMR158W			YDR469W	YJR147W	YJR147W
YDL137W	YOR293W	YDL137W		YHR141C	YHR007C-A	YHR007C-A		YNL079C	YEL012W	YEL012W		YLR367W	YBR201W	YBR201W										YMR084W	YHL046W-A	YHL046W-A		YOR105W	YGR253C			YAL030W	YNL202W	YNL202W
YMR260C	YMR260C	YMR260C		YMR071C	YMR071C	YMR071C		YEL012W	YCR018C-A	YCR018C-A		YDR381C-A	YMR256C	YMR256C										YER011W	YPL058C	YPL058C		YGL217C	YMR077C			YLR290C	YER052C	YER052C
YDR003W-A	YDL137W	YDR003W-A		YJL171C	YCR028C-A	YCR028C-A		YML009C-A	YHR051W	YHR051W		YDL219W	Q0010	Q0010										YBR093C	YDR455C	YDR455C		YLR342W-A	YLR298C			YLR165C	YJR150C	YJR150C
YKR057W	YKR057W	YKR057W		YCR028C-A	YHR141C	YHR141C		YLR221C	YLR423C	YLR423C		YBR201W	YFL013W-A	YFL013W-A										YER113C	YLR154W-B	YLR154W-B		YHR125W	YPL170W			YOL054W	YOR049C	YOR049C
YNR061C	YBR233W-A	YNR061C		YHR007C-A	YGR243W	YGR243W		YML026C	YKR014C	YKR014C		YLR221C	YKL162C-A	YKL162C-A										YHR032W-A	YNL019C	YNL019C		YAL065C	YHR001W-A			YKL067W	YKL078W	YKL078W
YBR058C-A	YOR357C	YBR058C-A		YDR157W	YDL135C	YDL135C		YLR423C	YPR012W	YPR012W		YKR074W	YLR435W	YLR435W										YHL049C	YIR030W-A	YIR030W-A		YNL033W	YGR142W			YMR008C	YHR216W	YHR216W
YOR257W	YJL189W	YOR257W		YLR279W	YJL078C	YJL078C		YPL170W	YJL049W	YJL049W		YBR201C-A	YDR183C-A	YDR183C-A										YJL156W-A	YPL187W	YPL187W		YDR433W	YGL029W			YEL025C	Q0255	Q0255
YOR094W	YMR065W	YOR094W		YGR243W	YBL080C	YBL080C		YGL031C	YGL031C	YGL031C		YMR256C	YIL030W-A	YIL030W-A										YMR141W-A	YLR142W	YLR142W		YIR020C	YBR084C-A			YNR055C	YBR092C	YBR092C
YPR166C	YNR061C	YPR166C		YDL152W	YCR063W	YCR063W		YBR290W	YJL166W	YJL166W		YFL013W-A	YOR293W	YOR293W										YDR384C	YIR032C	YIR032C		YLR466W	YNL174W			YIL059C	YBR093C	YBR093C
YER099C	YOR094W	YER099C		YDL135C	YIL066C	YIL066C		YKL172W	YBR253W	YBR253W		YDR468C	YLR065C	YLR065C										YBR220C	YPR128C	YPR128C		YJL156W-A	YEL051W			YEL069C	YER043C	YER043C
YAR066W	YFR001W	YAR066W		YPL103C	YNL233W	YNL233W		YLR406C	YLR406C	YLR406C		YDR183C-A	YDR468C	YDR468C										YIL059C	YBR222C	YBR222C		YFL067W	YML101C			YMR063W	YKR045C	YKR045C
YEL035C	YER006C-A	YEL035C		YMR315W	YLR438W	YLR438W		YJL049W	YGR020C	YGR020C		YLR435W	YPR143W	YPR143W										YNL044W	YJR073C	YJR073C		YNL205C	YDL075W			YDR432W	YBL042C	YBL042C
YBR071W	YOR257W	YBR071W		YBL013W	YJL214W	YJL214W		YKR014C	YDR381C-A	YDR381C-A		YDR473C	YDR473C	YDR473C										YGL226C-A	YMR230W-A	YMR230W-A		YAL037C-B	YDR092W			YLR390W-A	YER056C	YER056C
YOL052C-A	YFL017C	YOL052C-A		YDL105W	YLR357W	YLR357W		YJL166W	YOR252W	YOR252W		YLR065C	YGR085C	YGR085C										YER070W	Q0055	Q0055		YOR139C	YLR438C-A			YER135C	YNL203C	YNL203C
YMR063W	YBR200W-A	YMR063W		YMR135W-A	YDL117W	YDL117W		YCR018C-A	YDL065C	YDL065C		YOR293W	YOL099C	YOL099C										YLL055W	YJL158C	YJL158C		YIR013C	YML036W			YLR154W-B	YBR012C	YBR012C
YJL083W	YDR370C	YJL083W		YJR060W	YOR156C	YOR156C		YOR252W	YLR325C	YLR325C		YGR085C	YIL020C-A	YIL020C-A										Q0065	YJL153C	YJL153C		YGR139W	YLR257W			YLR134W	YLR237W	YLR237W
YGL088W	YNL043C	YGL088W		YLR058C	YBR038W	YBR038W		YDR381C-A	YGL080W	YGL080W		YDL092W	YML009C-A	YML009C-A										YNL205C	Q0250	Q0250		YIL105W-A	YPR167C			YFL021W	YNL192W	YNL192W
YHR178W	YLR306W	YHR178W		YHR159W	YPR145W	YPR145W		YBR253W	YDR378C	YDR378C		YIL030W-A	YDL092W	YDL092W										YGR270C-A	YBR296C	YBR296C		YER085C	YMR173W			YGR032W	YGL226C-A	YGL226C-A
YHR104W	YPL052W	YHR104W		YMR078C	YLR286C	YLR286C		YGL080W	YGL231C	YGL231C		YKL162C-A	YGR280C	YGR280C										YDR502C	YHR182C-A	YHR182C-A		YHR032C-A	YLR395C			YOR360C	YDR481C	YDR481C
YGR082W	YBR058C-A	YGR082W		YBR193C	YBR071W	YBR071W		YOR289W	YLR200W	YLR200W		YDR357C	YBL094C	YBL094C										YDL210W	Q0085	Q0085		YOR231C-A	YGR169C-A			YGL184C	YLR034C	YLR034C
YOR017W	YPL189C-A	YOR017W		YPL116W	YJL043W	YJL043W		YDL065C	YBR154C	YBR154C		YCL022C	YOR312C	YOR312C										YIL047C	YEL020C	YEL020C		YAL066W	YJR050W			YHR042W	YML031C-A	YML031C-A
YOL082W	YPL010W	YOL082W		YNL304W	YPR141C	YPR141C		YGR020C	YNL149C	YNL149C		YOR312C	YDR357C	YDR357C										YIL123W	YJL079C	YJL079C		YIR041W	YOR052C			YJL172W	YJL169W	YJL169W
YGL177W	YOL013W-B	YGL177W		YKL042W	YGR204W	YGR204W		YLR325C	YOR289W	YOR289W		YOL099C	YJR082C	YJR082C										YOR306C	YBR208C	YBR208C		YER023C-A	YFR032C-B			YOR034C	YKR041W	YKR041W
YPL259C	YHR215W	YPL259C		YMR322C	YBR146W	YBR146W		YGL231C	YHR121W	YHR121W		YPR143W	YDL147W	YDL147W										YKL163W	Q0105	Q0105		YDR464C-A	YBL092W			YKL068W	YEL032W	YEL032W
YER060W-A	YMR040W	YER060W-A		YML042W	YEL067C	YEL067C		YDR378C	YDR447C	YDR447C		YIL020C-A	YBL040C	YBL040C										YER152W-A	YNL033W	YNL033W		YIL163C	YPL108W			YJL056C	YOR084W	YOR084W
YKR054C	YLR388W	YKR054C		YMR280C	YDL127W	YDL127W		YBR154C	YGL220W	YGL220W		YBL094C	YCL022C	YCL022C										YEL042W	YHR139C	YHR139C		YPR076W	YPL136W			YDR055W	YJL109C	YJL109C
YEL061C	YGR219W	YEL061C		YBR277C	YGL183C	YGL183C		YDR447C	YOR357C	YOR357C		YGR280C	YPL038W-A	YPL038W-A										YBR291C	YLR157W-D	YLR157W-D		YPR160C-A	YER159C			YAL044W-A	YLL012W	YLL012W
YFR029W	YGL168W	YFR029W		YAL003W	YPR035W	YPR035W		YPR012W	YMR230W	YMR230W		YML009C-A	YBR253W	YBR253W										YIL117C	YKR039W	YKR039W		YER014C-A	YLR282C			YMR305C	YDL224C	YDL224C
YCL037C	YER099C	YCL037C		YOR188W	YOR073W	YOR073W		YLR200W	YGL041W-A	YGL041W-A		YDL147W	YKR085C	YKR085C										YNL192W	YCL026C-A	YCL026C-A		YGL261C	YAL030W			YJL101C	YLR400W	YLR400W
YBL085W	YKL169C	YBL085W		YPL259C	YOL019W	YOL019W		YOR357C	YPR142C	YPR142C		YCL048W	YAL055W	YAL055W										YPL111W	YEL073C	YEL073C		YFL065C	YHR050W-A			YAL053W	YKL004W	YKL004W
YDR213W	YPR169W-A	YDR213W		YLR205C	YOR331C	YOR331C		YHR121W	YDR427W	YDR427W		YNL303W	YNL303W	YNL303W										YMR305C	YJL171C	YJL171C		YDR442W	YEL003W			YDL094C	YJL130C	YJL130C
YDL182W	YDR031W	YDL182W		YER028C	YLR086W	YLR086W		YNL149C	YPR143W	YPR143W		YBL040C	YBR233W-A	YBR233W-A										YLL058W	YJL195C	YJL195C		YAR064W	YER092W			YBR235W	YGR055W	YGR055W
YOR073W-A	YER002W	YOR073W-A		YDL033C	YGR256W	YGR256W		YGL220W	YBR164C	YBR164C		YJR082C	YGR064W	YGR064W										YLR390W-A	YPR076W	YPR076W		YIR040C	YBL091C-A			YOR203W	YPL184C	YPL184C
YJL127C	YJL188C	YJL127C		YNL270C	YGR152C	YGR152C		YGL041W-A	YDR068W	YDR068W		YPL038W-A	YGR020C	YGR020C										YDR455C	Q0160	Q0160		YLR462W	YLL037W			YER076C	YJL195C	YJL195C
YML090W	YKR039W	YML090W		YKL031W	YGL177W	YGL177W		YDR427W	YNL038W	YNL038W		Q0010	YNL038W	YNL038W										YDR055W	Q0045	Q0045		YHL046C	YBR147W			YER090W	YMR035W	YMR035W
YPR106W	YER009W	YPR106W		YLR084C	YEL066W	YEL066W		YMR230W	YKR083C	YKR083C		YGR064W	YMR233W	YMR233W										YHR032C-A	Q0275	Q0275		YFL064C	YJL205C			YNL044W	YER113C	YER113C
YKL127W	YDL157C	YKL127W		YOR275C	YLR364W	YLR364W		YPL114W	YKL118W	YKL118W		YBR253W	YAL059W	YAL059W										YPL200W	YMR244W	YMR244W		YLL067C				YER039C	YOR153W	YOR153W
YLR245C	YGR046W	YLR245C		YCR064C	YGR067C	YGR067C		YPR142C	YIL014C-A	YIL014C-A		YKL117W	YKL117W	YKL117W										YBR076W	Q0080	Q0080		YDR545C-A				YEL064C	YEL071W	YEL071W
YGL045W	YNL301C	YGL045W		YNL324W	YML027W	YML027W		YBR164C	YGR222W	YGR222W		YIL086C	YLR434C	YLR434C										YHR214C-E	YLR120W-A	YLR120W-A		YEL075W-A				YNL112W	YGR138C	YGR138C
YAR031W	YPL080C	YAR031W		YMR069W	YLR255C	YLR255C		YIL098C	YMR263W	YMR263W		YAL055W	YIL086C	YIL086C										YML058W-A	YHR165W-A	YHR165W-A		YDL247W				YNR076W	YDR242W	YDR242W
YPR168W	YOR192C-C	YPR168W		YHL006W-A	YDL155W	YDL155W		YGR222W	YIL098C	YIL098C		YKR085C	YLR010C	YLR010C										YOR170W	YOR139C	YOR139C		YFL034C-A				YLL064C	YEL020W-A	YEL020W-A
YHL019W-A	YNL009W	YHL019W-A		YNR062C	YMR117C	YMR117C		YDR068W	YNL133C	YNL133C		YMR233W	YKR035C	YKR035C										YER184C	YLR462W	YLR462W						YMR084W	Q0060	Q0060
YPR201W	YDR034C-A	YPR201W		YDL131W	YPL077C	YPL077C		YPR143W	YOR276W	YOR276W		YGR020C	YKL156W	YKL156W										YDR542W	YOR161C-C	YOR161C-C						YDR492W	YLR235C	YLR235C
YOL019W	YLR104W	YOL019W		YPL032C	YKR001C	YKR001C		YKL118W	YDR201W	YDR201W		YKL150W	YJR057W	YJR057W										YPL187W	YEL075W-A	YEL075W-A						YPL052W	YOR072W	YOR072W
YGL197W	YPL119C-A	YGL197W		YNL126W	YPL158C	YPL158C		YNL038W	YKL033W-A	YKL033W-A		YBR233W-A	YIL063C	YIL063C										YNL019C	YHR125W	YHR125W						YMR069W	YCR025C	YCR025C
YCR063W	YCL066W	YCR063W		YFR035C	YHR180W-A	YHR180W-A		YIL014C-A	YGR024C	YGR024C		YNL038W	YPR062W	YPR062W										YGR032W	YIL105W-A	YIL105W-A						YKL198C	YHL016C	YHL016C
YHR116W	YCR040W	YHR116W		YCL037C	YJL187C	YJL187C		YNL133C	YBL090W	YBL090W		YLR434C	YER126C	YER126C										YMR082C	YHR126C	YHR126C						YIL060W	YPR012W	YPR012W
YPL250C	YLR342W-A	YPL250C		YKR007W	YAL064W-B	YAL064W-B		YOR276W	YBR258C	YBR258C		YOR289W	YKL150W	YKL150W										YHL046W-A	YPR077C	YPR077C						YPL017C	YOR378W	YOR378W
YKR001C	YCR001W	YKR001C		YNL278W	YPL261C	YPL261C		YMR263W	YDL166C	YDL166C		YKL156W	YBR062C	YBR062C										YDR433W	YER014C-A	YER014C-A						YJR147W	YNL141W	YNL141W
YBR083W	YOR105W	YBR083W		YPR151C	YMR305C	YMR305C		YKR083C	YLR145W	YLR145W		YAL059W	YOR289W	YOR289W										YIR030W-A	YLR062C	YLR062C						YER089C	YCR048W	YCR048W
YPL077C	YDR424C	YPL077C		YNL287W	YMR190C	YMR190C		YKL033W-A	YGR118W	YGR118W		YKR035C	YPR100W	YPR100W										YEL065W	YLL067C	YLL067C						YER070W	YDL037C	YDL037C
YGL239C	YNL162W-A	YGL239C		YFL021C-A	YHR104W	YHR104W		YBR258C	YPR102C	YPR102C		YBR062C	YNL070W	YNL070W										YNL339C	YLR061W	YLR061W						YLR412C-A	YER144C	YER144C
YMR055C	YBR013C	YMR055C		YMR179W	YDL223C	YDL223C		YBL090W	YHR132W-A	YHR132W-A		YIL063C	YGR105W	YGR105W										YPL058C	YIL063C							YKL078W	Q0250	Q0250
YLR234W	YLR443W	YLR234W		YFR029W	YGL216W	YGL216W		YGR024C	YLL037W	YLL037W		YLR010C	YOR252W	YOR252W										YMR230W-A	YER121W							YJR150C	YPR054W	YPR054W
YNL277W-A	YPL090C	YNL277W-A		YOL100W	YDR462W	YDR462W		YHR050W-A	YNL114C	YNL114C		YPR062W	YDR045C	YDR045C										YLR154W-B	YGR253C							YHR216W	YCL038C	YCL038C
YCL063W	YOR121C	YCL063W		YDR423C	YEL061C	YEL061C		YHR132W-A	YHR050W-A	YHR050W-A		YPL185W	YPL185W	YPL185W										YLR142W	YOR331C							YNL202W	YLL058W	YLL058W
YPR119W	YBR226C	YPR119W		YAL067C	YBR184W	YBR184W		YPR102C	YOR199W	YOR199W		YCL035C	YER133W	YER133W										YIR032C	YBL108C-A							YOR049C	YIL108W	YIL108W
YOR156C	YGR141W	YOR156C		YJL083W	YNL066W	YNL066W		YDR201W	YNL130C-A	YNL130C-A		YJR057W	YLR171W	YLR171W										YAR020C	YJR076C							YER052C	YOL011W	YOL011W
YGL209W	YKR088C	YGL209W		YAR015W	YDR213W	YDR213W		YDL166C	YER046W	YER046W		YPR100W	YMR263W	YMR263W										YPR128C	YOR082C							Q0255	YHR182C-A	YHR182C-A
YMR001C	YHR043C	YMR001C		YPL183W-A	YOR348C	YOR348C		YGR118W	YDR045C	YDR045C		YOR252W	YLR025W	YLR025W										YBR222C	YOR281C							YBR092C	YBR295W	YBR295W
YDL041W	YFL017W-A	YDL041W		YIL140W	YER153C	YER153C		YLR145W	YBR302C	YBR302C		YOL048C	YCL035C	YCL035C										YJR073C	YPL064C							YNL269W	YER017C	YER017C
YHR018C	YPL139C	YHR018C		YHR154W	YOL134C	YOL134C		YOR199W	YML132W	YML132W		YLR171W	YHR132W-A	YHR132W-A										YHR182C-A	YDR342C							YER043C	YER099C	YER099C
YBR098W	YCR082W	YBR098W		YKR054C	YKL127W	YKL127W		YML132W	YGR035W-A	YGR035W-A		YHR132W-A	YBL078C	YBL078C										YEL075C	YIL138C							YNL203C	YER083C	YER083C
YML083C	YPL225W	YML083C		YLR052W	YNL277W-A	YNL277W-A		YBR302C	YDR327W	YDR327W		YER126C	YNL153C	YNL153C										YJL153C	YPL261C							YBR093C	YIL039W	YIL039W
YBR232C	YFR004W	YBR232C		YNR056C	YBL085W	YBL085W		YER046W	YER042W	YER042W		YLR025W	YJR100C	YJR100C										Q0055	YKL023W							YKR045C	YMR238W	YMR238W
YLR086W	YJL104W	YLR086W		YGR153W	YGR109C	YGR109C		YNL114C	YMR150C	YMR150C		YBL078C	YJL004C	YJL004C										YBR296C	YPR120C							YBR012C	YEL049W	YEL049W
YOL134C	YIL047C-A	YOL134C		YLL065W	YFL012W-A	YFL012W-A		YNL130C-A	YKL160W	YKL160W		YER133W	YDL152W	YDL152W										Q0250	YKL091C							YBL042C	YDR003W-A	YDR003W-A
YNL233W	YBL090W	YNL233W		YPR136C	YBR113W	YBR113W		YDR327W	YMR028W	YMR028W		YNL070W	YBL090W	YBL090W										YJL158C	YMR183C							YER056C	YLR416C	YLR416C
YBL074C	YLR154W-C	YBL074C		YPL104W	YFL059W	YFL059W		YDR045C	YGR085C	YGR085C		YMR263W	YDL158C	YDL158C										Q0085	YLR327C							YGL226C-A	Q0055	Q0055
YJL214W	YMR151W	YJL214W		YIL123W	YDR501W	YDR501W		YMR150C	YBR268W	YBR268W		YDR045C	YOL048C	YOL048C										YEL020C	YBR027C							YML031C-A	YNL028W	YNL028W
YDR146C	YER186C	YDR146C		YKL097C	YHR178W	YHR178W		YKL160W	YJL004C	YJL004C		YJR100C	YDL136W	YDL136W										YNL097C-B	YBR278W							YJL169W	YEL063C	YEL063C
YOR373W	YGR105W	YOR373W		YLR234W	YOR373W	YOR373W		YGR085C	YHR181W	YHR181W		YBR056W	YBR302C	YBR302C										YPR076W	YMR173W							YLR237W	YER009W	YER009W
YBR146W	YDR163W	YBR146W		YOR107W	YLL040C	YLL040C		YER042W	YKR035C	YKR035C		YGR105W	YML132W	YML132W										YNL033W	YPL250C							YNL192W	YEL042W	YEL042W
YNL236W	YBR137W	YNL236W		YCR068W	YJL118W	YJL118W		YHR181W	YML022W	YML022W		YJL004C	YBR164C	YBR164C										YJL079C	YPL108W							YDR481C	YDR502C	YDR502C
YGL024W	YDL166C	YGL024W		YMR036C	YPL250W-A	YPL250W-A		YJL004C	YPL142C	YPL142C		YNL153C	YCL001W	YCL001W										YBR208C	YLR239C							YLR034C	YKL102C	YKL102C
YOR073W	YPR101W	YOR073W		YHL037C	YDL062W	YDL062W		YMR028W	YMR233W	YMR233W		YCL073C	YNR032C-A	YNR032C-A										Q0105	YOL109W							YDR535C	YPL200W	YPL200W
YJL187C	YIL004C	YJL187C		YKL161C	YGL218W	YGL218W		YPL142C	YDL147W	YDL147W		YBR302C	YDL050C	YDL050C										YCL026C-A	YNL188W							YKR041W	YPR128C	YPR128C
YMR190C	YPR200C	YMR190C		YBL059W	YAL045C	YAL045C		YBR268W	YNR061C	YNR061C		YML132W	YLR036C	YLR036C										YHR139C	YAL003W							YEL032W	YPR116W	YPR116W
YHL030W-A	YOL127W	YHL030W-A		YAR031W	YHL031C	YHL031C		YKR035C	YOR015W	YOR015W		YBL090W	YDR008C	YDR008C										YLR157W-D	YNL136W							YLL012W	YMR007W	YMR007W
YDL196W	YLR251W	YDL196W		YER116C	YMR001C	YMR001C		YGR035W-A	YDL191W	YDL191W		YPL271W	YDR378C	YDR378C										YKR039W	YBR089C-A							YOR084W	YNL210W	YNL210W
YOR141C	YCR096C	YOR141C		YFL039C	YLR142W	YLR142W		YML022W	YDR336W	YDR336W		YDL158C	YPR134W	YPR134W										YEL073C	YLR298C							YJL109C	YNL019C	YNL019C
YGL216W	YBR012C	YGL216W		YAL016C-A	YBR232C	YBR232C		YLL037W	YDR379C-A	YDR379C-A		YDL136W	YPL271W	YPL271W										YJL171C	YIR004W							YLR400W	YHR131W-A	YHR131W-A
YGR203W	YGR074W	YGR203W		YGR082W	YDR344C	YDR344C		YPL123C	YMR143W	YMR143W		YCL001W	YER067W	YER067W										YJL195C	YGL005C							YDL224C	YOR300W	YOR300W
YOR331C	YDR167W	YOR331C		YML037C	YGL045W	YGL045W		YNR061C	YPL090C	YPL090C		YBR164C	YBR056W	YBR056W										Q0160	YML036W							YKL004W	YIR030W-A	YIR030W-A
YGR146C-A	YPR146C	YGR146C-A		YGR288W	YOL082W	YOL082W		YPR098C	YPL123C	YPL123C		YOL032W	YGR240C-A	YGR240C-A										Q0045	YDL091C							YJL195C	YIR032C	YIR032C
YKR097W	YLR167W	YKR097W		YHR143W	YBL109W	YBL109W		YDL147W	YDL075W	YDL075W		YDR008C	YGR243W	YGR243W										YMR244W	YMR323W							YOR072W	YEL046C	YEL046C
YHR099W	YJL001W	YHR099W		YDR422C	YPL127C	YPL127C		YMR233W	YDR248C	YDR248C		YPR134W	YDR034C-A	YDR034C-A										Q0275	YFR046C							YJL130C	YOR387C	YOR387C
YOR107W	YIL002W-A	YOR107W		YPL120W	YBR049C	YBR049C		YDL191W	YJL104W	YJL104W		YNR032C-A	YMR294W-A	YMR294W-A										Q0080	YNL228W							YGR055W	YIL047C	YIL047C
YLR217W	YPL143W	YLR217W		YDR214W	YJR146W	YJR146W		YDL075W	YLR147C	YLR147C		YLR036C	YCR016W	YCR016W										YOR139C	YMR077C							YPL184C	YBR296C	YBR296C
YCR101C	YDR378C	YCR101C		YHR116W	YEL019C	YEL019C		YPR170W-B	YPR098C	YPR098C		YER067W	YNL122C	YNL122C										YLR120W-A	YLR290C							YLR235C	YGL170C	YGL170C
YDR360W	YJR094W-A	YDR360W		YDR019C	YLR437C-A	YLR437C-A		YMR143W	YLR262C	YLR262C		YDR378C	YOR366W	YOR366W										YLR462W	YGR146C-A							YMR035W	YOR170W	YOR170W
YCR049C	YCR041W	YCR049C		YOR382W	YGR142W	YGR142W		YPL090C	YPR170W-B	YPR170W-B		YGR243W	YOL032W	YOL032W										YEL075W-A	YIR024C							YCR025C	YDR384C	YDR384C
YDR123C	YBR093C	YDR123C		YPL253C	YBL074C	YBL074C		YMR286W	YCR028C-A	YCR028C-A		YDL050C	YCR018C-A	YCR018C-A										YHR165W-A	YAR002C-A							YER113C	YEL020C	YEL020C
YGL174W	YDR426C	YGL174W		YJL127C	YBR130C	YBR130C		YDR248C	YGR129W	YGR129W		YGR240C-A	YOR193W	YOR193W										YOR108C-A	YOR174W							YOR153W	YHL012W	YHL012W
YNR073C	YPR113W	YNR073C		YMR024W	YPR177C	YPR177C		YDR336W	YBR233W-A	YBR233W-A		YDL152W	YDL121C	YDL121C										YBR223W-A	YOR135C							YEL071W	YDL210W	YDL210W
YNR062C	YLR301W	YNR062C		YJL137C	YDL196W	YDL196W		YDR379C-A	YMR286W	YMR286W		YJR099W	YLR438C-A	YLR438C-A										YOR161W-B	YLR151C							YGR138C	YNR041C	YNR041C
YHL031C	YLR307W	YHL031C		YOR100C	YPR096C	YPR096C		YOR015W	YKR094C	YKR094C		YOR193W	YPL117C	YPL117C										YHR125W	YDR460W							YEL020W-A	YHR032W-A	YHR032W-A
YPL124W	YLR227C	YPL124W		YJL108C	YMR094W	YMR094W		YJL104W	YOR006C	YOR006C		YCR016W	YNL146C-A	YNL146C-A										YDR545C-A	YGR275W							YDR242W	YJL015C	YJL015C
YBR065C	YPL002C	YBR065C		YKL148C	YIL150C	YIL150C		YLR147C	YDR529C	YDR529C		YDR034C-A	YJR099W	YJR099W										YER023C-A	YLR102C							Q0060	YER184C	YER184C
YAL045C	YDR182W-A	YAL045C		YJL026C-A	YPR150W	YPR150W		YKR094C	YER187W	YER187W		YNL122C	YLR325C	YLR325C										YEL021W	YPL239W							YPR012W	YPL187W	YPL187W
YER153C	YNL100W	YER153C		YPL199C	YMR166C	YMR166C		YCR028C-A	YKL001C	YKL001C		YMR294W-A	YDR372C	YDR372C										YER085C	YJR050W							YOR378W	YER172C-A	YER172C-A
YLR357W	YOR118W	YLR357W		YGL197W	YOR035C	YOR035C		YLR262C	YEL050W-A	YEL050W-A		YDR372C	YHR136C	YHR136C										YHR126C	YOL054W							YNL141W	YER152W-A	YER152W-A
YDR214W	YNL024C-A	YDR214W		YGR237C	YOR041C	YOR041C		YEL050W-A	YDR357C	YDR357C		YLR438C-A	YOR015W	YOR015W										YDR464C-A	YML026C							YDL037C	YLR444C	YLR444C
YDR193W	YDR467C	YDR193W		YGL028C	YGR146C	YGR146C		YGR129W	YJR141W	YJR141W		YNL146C-A	YBR047W	YBR047W										YOR161C-C	YIL097W							YHL016C	YBR076W	YBR076W
YIL066W-A	YMR188C	YIL066W-A		YLR061W	YMR032W	YMR032W		YDR529C	YMR158W-B	YMR158W-B		YLR325C	YAR003W	YAR003W										YIL105W-A								YCR048W	YGR270C-A	YGR270C-A
YMR198W	YPR094W	YMR198W		YNR005C	YML083C	YML083C		YER187W	YOR036W	YOR036W		YOR366W	YBR210W	YBR210W										YPR077C								YPR054W	Q0045	Q0045
YMR183C	YOR052C	YMR183C		YGL071W	YLR045C	YLR045C		YOR006C	YJL001W	YJL001W		YAR003W	YOR169C	YOR169C										YER014C-A								YER144C	YPL278C	YPL278C
YAL064W-B	YLR406C	YAL064W-B		YIL026C	YGL174W	YGL174W		YDR357C	YIL040W	YIL040W		YPL117C	YGR131W	YGR131W										YLR062C								YHR182C-A	YIR018C-A	YIR018C-A
YGR067C	YKR026C	YGR067C		YNL106C	YGR140W	YGR140W		YBR233W-A	YBL040C	YBL040C		YHR136C	YGL220W	YGL220W										YLL067C								Q0250	YBR178W	YBR178W
YFR035C	YBR022W	YFR035C		YBL091C-A	YNL310C	YNL310C		YKL001C	YKL061W	YKL061W		YBR047W	YJL011C	YJL011C										YLR061W								YCL038C	YDR095C	YDR095C
YEL067C	YBR255C-A	YEL067C		YDR123C	YOR073W-A	YOR073W-A		YJL001W	YDR532C	YDR532C		YBR210W	YKL138C-A	YKL138C-A																		YLL058W	YEL040W	YEL040W
YDR022C	YER050C	YDR022C		YMR303C	YDL240W	YDL240W		YOR036W	YIR024C	YIR024C		YDL121C	YAL026C-A	YAL026C-A																		YIL108W	Q0105	Q0105
YGL007W	YOL124C	YGL007W		YOR282W	YLL024C	YLL024C		YJR141W	YDR372C	YDR372C		YOR169C	YOR357C	YOR357C																		YOL011W	YIL165C	YIL165C
YPL127C	YDR366C	YPL127C		YNL338W	YEL030W	YEL030W		YPR059C	YKL065C	YKL065C		YCR018C-A	YAL008W	YAL008W																		YIR020C	YBR208C	YBR208C
YLR353W	YML022W	YLR353W		YAR066W	YLR338W	YLR338W		YKL065C	YAL025C	YAL025C		YOR015W	YKL033W-A	YKL033W-A																		YDR003W-A	YJL222W-B	YJL222W-B
YJL118W	YMR130W	YJL118W		YBR065C	YNL328C	YNL328C		YBL040C	YDL115C	YDL115C		YGL220W	YJR141W	YJR141W																		YBR295W	YJL153C	YJL153C
YGL081W	YHR181W	YGL081W		YPL280W	YBL002W	YBL002W		YDR372C	YOR194C	YOR194C		YGR131W	YBL026W	YBL026W																		YER017C	YDR455C	YDR455C
YIR017C	YER148W	YIR017C		YOR077W	YER079C-A	YER079C-A		YDL115C	YGR206W	YGR206W		YKL138C-A	YMR052C-A	YMR052C-A																		YNL028W	YBR056C-B	YBR056C-B
YML091C	YBR183W	YML091C		YCL014W	YPL222W	YPL222W		YIR024C	YPR094W	YPR094W		YOR357C	YPL065W	YPL065W																		YLR416C	YDR360W	YDR360W
YIL150C	YNR034W-A	YIL150C		YJR095W	YKL178C	YKL178C		YDR532C	YPR100W	YPR100W		YAL008W	YNL286W	YNL286W																		YER099C	YPL111W	YPL111W
YBR049C	YPL130W	YBR049C		YNL187W	YBR051W	YBR051W		YIL040W	YLR251W	YLR251W		YNL286W	YDR504C	YDR504C																		YEL049W	YLL055W	YLL055W
YFL012W-A	YCL011C	YFL012W-A		YPR007C	YIR017C	YIR017C		YKL061W	YBR201C-A	YBR201C-A		YDL130W-A	YDR427W	YDR427W																		YER083C	YAL037C-B	YAL037C-B
YPL261C	YNL084C	YPL261C		YGL209W	YNR067C	YNR067C		YLR251W	YGL230C	YGL230C		YAL026C-A	YDL002C	YDL002C																		YIL039W	YBR134W	YBR134W
YAL064C-A	YPL034W	YAL064C-A		YLR431C	YPL036W	YPL036W		YMR158W-B	YDR339C	YDR339C		YJL011C	YDR426C	YDR426C																		YKL102C	Q0085	Q0085
YJL019W	YBR159W	YJL019W		YGL075C	YPR119W	YPR119W		YBR056W	YLR306W	YLR306W		YKL033W-A	YDL130W-A	YDL130W-A																		YMR238W	YKR032W	YKR032W
YGL152C	YNL200C	YGL152C		YEL035C	YDR146C	YDR146C		YCL035C	YCR016W	YCR016W		YJR141W	YMR141C	YMR141C																		YPL200W	YJL079C	YJL079C
YGL254W	YDR340W	YGL254W		YPL233W	YGL088W	YGL088W		YPR094W	YPR059C	YPR059C		YMR052C-A	YHR021C	YHR021C																		Q0055	Q0075	Q0075
YGL188C-A	YCR014C	YGL188C-A		YGL038C	YLR353W	YLR353W		YPR100W	YCL035C	YCL035C		YLR406C	YGR275W	YGR275W																		YEL063C	YBR220C	YBR220C
YJR146W	YKL133C	YJR146W		YLR428C	YGR203W	YGR203W		YOR194C	YBR056W	YBR056W		YDR426C	YHR145C	YHR145C																		YER009W	YAL065C	YAL065C
YLR334C	YGL103W	YLR334C		YNR073C	YPL124W	YPL124W		YGR206W	YPL099C	YPL099C		YDR427W	YDR320C-A	YDR320C-A																		YEL042W	YHL049C	YHL049C
YGR204W	YPR176C	YGR204W		YOR146W	YNL191W	YNL191W		YAL025C	YDL121C	YDL121C		YDL002C	YLR406C	YLR406C																		YDR502C	Q0065	Q0065
YCR064C	YBL102W	YCR064C		YGL024W	YBR117C	YBR117C		YDR339C	YML001W	YML001W		YBL026W	YDR494W	YDR494W																		YPR128C	YNL142W	YNL142W
YNR005C	YJL143W	YNR005C		YIL066C	YNL300W	YNL300W		YBR201C-A	YBR027C	YBR027C		YPL065W	YGR034W	YGR034W																		YMR007W	YGL217C	YGL217C
YCR095W-A	YGL020C	YCR095W-A		YOR328W	YBR180W	YBR180W		YLR306W	YPL010W	YPL010W		YBL068W-A	YGR204C-A	YGR204C-A																		YNL019C	YDR215C	YDR215C
YMR306C-A	YBR027C	YMR306C-A		YJL184W	YLR136C	YLR136C		YGL230C	YDR468C	YDR468C		YHR021C	YDR336W	YDR336W																		YPR116W	YKR039W	YKR039W
YNL310C	YDR415C	YNL310C		YAL032C	YOL052C-A	YOL052C-A		YCR016W	YBR167C	YBR167C		YMR173W	YGR024C	YGR024C																		YOR300W	YMR244W	YMR244W
YMR094W	YOL139C	YMR094W		YHR099W	YBR182C	YBR182C		YML001W	YJR011C	YJR011C		YMR141C	YAL063C-A	YAL063C-A																		YNL210W	YHR069C-A	YHR069C-A
YOR035C	YGR064W	YOR035C		YOR017W	YPR125W	YPR125W		YDR461C-A	YDR461C-A	YDR461C-A		YDR494W	YPR099C	YPR099C																		YHR131W-A	YPL058C	YPL058C
YEL019C	YIL071W-A	YEL019C		YOR141C	YLR210W	YLR210W		YPL099C	YFL005W	YFL005W		YGR275W	YER159C	YER159C																		YIR030W-A	YJR073C	YJR073C
YNL333W	YKL136W	YNL333W		YBR083W	YFR046C	YFR046C		YPL010W	YGR230W	YGR230W		YJL161W	YMR173W	YMR173W																		YFL067W	YDL034W	YDL034W
YPL158C	YHL012W	YPL158C		YDR116C	YMR169C	YMR169C		YDL121C	YNL215W	YNL215W		YKL026C	YNL180C	YNL180C																		YOR387C	YJR086W	YJR086W
YLR210W	YDL136W	YLR210W		YJL092W	YLR273C	YLR273C		YDR468C	YOL106W	YOL106W		YGR034W	YIL127C	YIL127C																		YHR214W	Q0275	Q0275
YGR142W	YHR007C-A	YGR142W		YAR075W	YJL045W	YJL045W		YJR011C	YLR466C-A	YLR466C-A		YDR320C-A	YKL026C	YKL026C																		YDR169C-A	YOR376W-A	YOR376W-A
YDL062W	YDR013W	YDL062W		YPL209C	YBR098W	YBR098W		YLR466C-A	YLR467C-A	YLR467C-A		YDR504C	YDR168W	YDR168W																		YIR032C	YOR105W	YOR105W
YPR096C	YCR075W-A	YPR096C		YJL043W	YGL153W	YGL153W		YLR467C-A	YOR396C-A	YOR396C-A		YDR336W	YAR008W	YAR008W																		YEL046C	YDR433W	YDR433W
YJL182C	YBR175W	YJL182C		YDR480W	YLR122C	YLR122C		YOR396C-A	YPR109W	YPR109W		YBR111C	YFR008W	YFR008W																		YGL170C	YHR032C-A	YHR032C-A
YDL117W	YNL153C	YDL117W		YCR063W	YJR092W	YJR092W		YFL005W	YOL109W	YOL109W		YFR008W	YGL080W	YGL080W																		YOR170W	YCL026C-A	YCL026C-A
YNL338W	YLR008C	YNL338W		YML091C	YDR070C	YDR070C		YBR167C	YKL099C	YKL099C		YPR099C	YJL161W	YJL161W																		YIL047C	YJL171C	YJL171C
YDR113C	YLR107W	YDR113C		YNL104C	YNL117W	YNL117W		YGR230W	YCL067C	YCL067C		YAR008W	YBR111C	YBR111C																		YBR296C	YNL130C-A	YNL130C-A
YLR273C	YGR243W	YLR273C		YBR269C	YML057C-A	YML057C-A		YDR210W	YCR039C	YCR039C		YGR024C	YLR147C	YLR147C																		YDR384C	YOR169C	YOR169C
YMR166C	YJR101W	YMR166C		YGL254W	YJR160C	YJR160C		YPR109W	YBL078C	YBL078C		YGL080W	YOR287C	YOR287C																		YEL020C	YPR123C	YPR123C
YBL109W	YOL162W	YBL109W		YLL041C	YLR377C	YLR377C		YDR276C	YDR276C	YDR276C		YER159C	YJL115W	YJL115W																		YHL012W	YEL073C	YEL073C
YBR072W	YDR059C	YBR072W		YLR438W	YMR198W	YMR198W		YNL215W	YMR059W	YMR059W		YDR168W	YJL166W	YJL166W																		YJL015C	YNL033W	YNL033W
YDL240W	YLR400W	YDL240W		YLR390W	YOL110W	YOL110W		YBL078C	YNL336W	YNL336W		YNL180C	YGR206W	YGR206W																		YOR161C-C	YHR125W	YHR125W
YML057C-A	YDR066C	YML057C-A		YGR164W	YGL175C	YGL175C		YNL336W	YKL068W-A	YKL068W-A		YLR147C	YJL140W	YJL140W																		YDL210W	YIL105W-A	YIL105W-A
YGR109C	YDL027C	YGR109C		YLR217W	YJL019W	YJL019W		YBR027C	YDL172C	YDL172C		YHR043C	YHR043C	YHR043C																		YHR032W-A	Q0080	Q0080
YBR190W	YKL006W	YBR190W		YHL019W-A	YCL063W	YCL063W		YCR039C	YPL038W-A	YPL038W-A		YIL127C	YPL035C	YPL035C																		YIR013C	YLR342W-A	YLR342W-A
YDR488C	YMR157C	YDR488C		YBL080C	YDL085W	YDL085W		YCL067C	YPR062W	YPR062W		YJL166W	YLR175W	YLR175W																		YNR041C	YFL065C	YFL065C
YFR046C	YOL077W-A	YFR046C		YPR201W	YKL036C	YKL036C		YAR027W	YDR302W	YDR302W		YJL140W	YDR515W	YDR515W																		YPL187W	Q0160	Q0160
YJL108C	YPR130C	YJL108C		YOR156C	YCR095W-A	YCR095W-A		YOL109W	YDR210W	YDR210W		YPL035C	YKL056C	YKL056C																		YGR270C-A	YNL205C	YNL205C
YLR236C	YER188W	YLR236C		YBL025W	YIL057C	YIL057C		YPL038W-A	YPR052C	YPR052C		YJL115W	YJR085C	YJR085C																		YLR347W-A	YFL064C	YFL064C
YOR264W	YDR514C	YOR264W		YMR055C	YDL003W	YDL003W		YMR059W	YAL026C-A	YAL026C-A		YAL063C-A	YOR036W	YOR036W																		YIR018C-A	YJL156W-A	YJL156W-A
YMR069W	YJR024C	YMR069W		YMR183C	YDL041W	YDL041W		YPR062W	YBL094C	YBL094C		YGR206W	YGL244W	YGL244W																		YLR444C	YGR139W	YGR139W
YNL300W	YGL187C	YNL300W		YLR357W	YNL072W	YNL072W		YKL099C	YAR027W	YAR027W		YOR287C	YDR342C	YDR342C																		YER184C	YOR139C	YOR139C
YLL024C	YNL286W	YLL024C		YJL078C	YDR113C	YDR113C		YKL068W-A	YPL237W	YPL237W		YDR515W	YDR383C	YDR383C																		YOR329W-A	YAR064W	YAR064W
YNR040W	YNL052W	YNR040W		YJL214W	YHL030W-A	YHL030W-A		YPR052C	YLR434C	YLR434C		YOR036W	YDR183W	YDR183W																		YER172C-A	YJL032W	YJL032W
YGL153W	YJL166W	YGL153W		YNL233W	YDR024W	YDR024W		YDR302W	YOR258W	YOR258W		YDR383C	YBR217W	YBR217W																		YDR095C	YPR076W	YPR076W
YBR158W	YDR328C	YBR158W		YDL117W	YMR175W	YMR175W		YDL172C	YCR020C-A	YCR020C-A		YGR204C-A	YCR028C-A	YCR028C-A																		YER152W-A	YIR040C	YIR040C
YGR140W	YMR071C	YGR140W		YBR071W	YNR040W	YNR040W		YKL026C	YJR086W	YJR086W		YKL056C	YJL142C	YJL142C																		YBR076W	YPR077C	YPR077C
YLL040C	YHR178W	YLL040C		YGL183C	YDR193W	YDR193W		YJR086W	YGR204C-A	YGR204C-A		YDR342C	YJL001W	YJL001W																		YPL278C	YER014C-A	YER014C-A
YNL104C	YOL052C-A	YNL104C		YDL127W	YJR053W	YJR053W		YPL237W	YKL026C	YKL026C		YJR085C	YNL147W	YNL147W																		YBR178W	YLR462W	YLR462W
YNL289W	YDL182W	YNL289W		YPR145W	YBR190W	YBR190W		YAL026C-A	YNL303W	YNL303W		YBR230W-A	YBR230W-A	YBR230W-A																		Q0045	YEL075W-A	YEL075W-A
YGR041W	YGR082W	YGR041W		YOL019W	YPL044C	YPL044C		YBL094C	YER026C	YER026C		YLR175W	YLR297W	YLR297W																		YIL165C	YFL034C-A	YFL034C-A
YNL078W	YBR071W	YNL078W		YPL261C	YIR018W	YIR018W		YLR434C	YDR005C	YDR005C		YLR297W	YKL061W	YKL061W																		YJL222W-B	YDL247W	YDL247W
YLR385C	YOR017W	YLR385C		YGR204W	YHR028W-A	YHR028W-A		YOL106W	YGR053C	YGR053C		YDR183W	YER019C-A	YER019C-A																		YDR455C	DESeq2
YOL085C	YGL088W	YOL085C		YBR038W	YMR163C	YMR163C		YOR258W	YER071C	YER071C		YGL244W	YNL081C	YNL081C																		YEL040W	YGL260W
YFL064C	YPL259C	YFL064C		YPR141C	YGR108W	YGR108W		YGR053C	YDL212W	YDL212W		YJL001W	YDL009C	YDL009C																		Q0105	YDR358W
YDL003W	YKR054C	YDL003W		YGL177W	YDR488C	YDR488C		YNL303W	YNL043C	YNL043C		YHR145C	YAL037C-B	YAL037C-B																		YEL075C	YFR036W-A
YOR041C	YDR213W	YOR041C		YLR286C	YDR451C	YDR451C		YDR005C	YPR046W	YPR046W		YER019C-A	YCR020C-A	YCR020C-A																		YHR165W-A	YGR259C
YPR125W	YAR066W	YPR125W		YEL067C	YJL182C	YJL182C		YCR020C-A	YDL085C-A	YDL085C-A		YCR028C-A	YLR211C	YLR211C																		YKR032W	YMR315W
YBR130C	YJL083W	YBR130C		YBR146W	YMR120C	YMR120C		YER026C	YDL009C	YDL009C		YJL142C	YNL336W	YNL336W																		YBR056C-B	YDR342C
YDR344C	YFR029W	YDR344C		YGR256W	YNL289W	YNL289W		YDL009C	YML094W	YML094W		YLR211C	YBR181C	YBR181C																		YBR208C	YPL107W
YBL013W	YCL037C	YBL013W		YLR364W	YDR022C	YDR022C		YER071C	YPL071C	YPL071C		YBR217W	YBL059C-A	YBL059C-A																		YGR294W	YFR036W
YNL072W	YPR106W	YNL072W		YOR073W	YIL142C-A	YIL142C-A		YLR284C	YLR284C	YLR284C		YIL097W	YIL027C	YIL027C																		YJL153C	YBL059W
YPL141C	YHR104W	YPL141C		YGR152C	YFR036W	YFR036W		YPR165W	YIL138C	YIL138C		YNL147W	YGL020C	YGL020C																		YDR360W	YBR194W
YHR172W	YMR063W	YHR172W		YAL064W-B	YGL081W	YGL081W		YPR046W	YOR075W	YOR075W		YBR181C	YFL005W	YFL005W																		YBR134W	YBR277C
YGL175C	YEL061C	YGL175C		YEL066W	YLR385C	YLR385C		YML094W	YDR058C	YDR058C		YNL081C	YML098W	YML098W																		YLL055W	YDL158C
YJL107C	YGL177W	YJL107C		YLR086W	YLL032C	YLL032C		YDL212W	YLR065C	YLR065C		YAL037C-B	YIL097W	YIL097W																		YPL111W	YJR050W
YJR053W	YPR201W	YJR053W		YOR331C	YPL141C	YPL141C		YBR244W	YBR244W	YBR244W		YGL020C	YLR312C	YLR312C																		Q0085	YLR239C
YER079C-A	YOL082W	YER079C-A		YLR255C	YHR139C	YHR139C		YLR297W	YPR165W	YPR165W		YDL009C	YDR328C	YDR328C																		YAL065C	YPL094C
YJL020W-A	YHL019W-A	YJL020W-A		YHR180W-A	YBR157C	YBR157C		YDR058C	YKL138C-A	YKL138C-A		YCL033C	YPR130C	YPR130C																		YAL037C-B	YNR025C
YDR451C	YBL085W	YDR451C		YPL077C	YHR172W	YHR172W		YPL071C	YDR078C	YDR078C		YNL336W	YOR115C	YOR115C																		YJL079C	YLR285C-A
YMR199W	YJL127C	YMR199W		YMR117C	YPL256C	YPL256C		YDL085C-A	YLR292C	YLR292C		YKL061W	YLR261C	YLR261C																		YNR075W	YGL188C-A
YEL066W	YEL035C	YEL066W		YDL155W	YMR199W	YMR199W		YOR075W	YPL211W	YPL211W		YGR209C	YLR292C	YLR292C																		Q0075	YOL083W
YIR018W	YML090W	YIR018W		YGR067C	YNL327W	YNL327W		YKL138C-A	YMR294W	YMR294W		YCR020C-A	YJL123C	YJL123C																		YBR220C	YMR158W
YLL032C	YKL127W	YLL032C		YPR035W	YBR124W	YBR124W		YNL043C	YKL162C-A	YKL162C-A		YML098W	YLR101C	YLR101C																		YHL049C	YJR156C
YNL066W	YAR031W	YNL066W		YNL277W-A	YML109W	YML109W		YLR065C	YDR183W	YDR183W		YPR130C	YDR471W	YDR471W																		Q0065	YIL097W
YNL191W	YKR001C	YNL191W		YJL187C	YPL073C	YPL073C		YIL138C	YLR297W	YLR297W		YLR261C	YCL033C	YCL033C																		YHR069C-A	YDL061C
YBR124W	YGL209W	YBR124W		YML027W	YDL182W	YDL182W		YLR292C	YLR298C	YLR298C		YJL123C	YGL031C	YGL031C																		YGL217C	YPR099C
YNL328C	YGL045W	YNL328C		YKR001C	YDR521W	YDR521W		YIL148W	YIL148W	YIL148W		YFL005W	YGR209C	YGR209C																		YDR215C	YDR253C
YOR055W	YHR116W	YOR055W		YHR104W	YKR097W	YKR097W		YDR078C	YER037W	YER037W		YLR101C	YGR215W	YGR215W																		YNL142W	YDR383C
YEL059W	YBR083W	YEL059W		YMR305C	YGR146C-A	YGR146C-A		YDR183W	YGR286C	YGR286C		YGL031C	YER112W	YER112W																		YLR466W	YDR461C-A
YBL071W-A	YPL250C	YBL071W-A		YDL223C	YBR224W	YBR224W		YMR294W	YCR090C	YCR090C		YBL059C-A	YOR279C	YOR279C																		YMR244W	YGL005C
YMR163C	YCR063W	YMR163C		YPL158C	YJL107C	YJL107C		YER037W	YPR101W	YPR101W		YLR252W	YLR252W	YLR252W																		YKR039W	YJR076C
YHR143W	YGL197W	YHR143W		YBR113W	YLR463C	YLR463C		YPL211W	YIR005W	YIR005W		YLR312C	YDR058C	YDR058C																		YPL058C	YLR080W
YOR263C	YOR073W-A	YOR263C		YGL216W	YDL032W	YDL032W		YLR298C	YJL156W-A	YJL156W-A		YOR115C	YOL149W	YOL149W																		YDL034W	YDL177C
YLR338W	YPL077C	YLR338W		YMR190C	YLL066W-B	YLL066W-B		YCR090C	YJL190C	YJL190C		YIL027C	YLR146W-A	YLR146W-A																		YJR073C	YGL250W
YML109W	YER060W-A	YML109W		YER153C	YDR507C	YDR507C		YGR204C-A	YBR201W	YBR201W		YLR076C	YAR030C	YAR030C																		YJR086W	YIR004W
YIL142C-A	YGL239C	YIL142C-A		YNL066W	YGL235W	YGL235W		YPR101W	YJL140W	YJL140W		YDR471W	YJL030W	YJL030W																		YOR376W-A	YKL013C
YLR437C-A	YMR055C	YLR437C-A		YGL218W	YNL285W	YNL285W		YKL162C-A	YMR316C-A	YMR316C-A		YDR328C	YLR076C	YLR076C																		YOR105W	YBR299W
YGL218W	YPR168W	YGL218W		YCR108C	YBR156C	YBR156C		YGR286C	YJR057W	YJR057W		YDR461C-A	YKR040C	YKR040C																		Q0275	YLR423C
YFR036W	YOL019W	YFR036W		YDR462W	YER124C	YER124C		YJL140W	YJR094W-A	YJR094W-A		YLR292C	YGL041W-A	YGL041W-A																		YDR433W	YOR331C
YPL256C	YPR119W	YPL256C		YFL012W-A	YER104W	YER104W		YJR094W-A	YML108W	YML108W		YPL078C	YPR108W	YPR108W																		YCL026C-A	YNL179C
YLR183C	YLR245C	YLR183C		YBR184W	YBL071W-A	YBL071W-A		YJL156W-A	YLR101C	YLR101C		YAR030C	YPL078C	YPL078C																		YJL171C
YPL073C	YNL277W-A	YPL073C		YEL061C	YOR314W	YOR314W		YBR201W	YMR107W	YMR107W		YKR040C	YCL055W	YCL055W																		YPR123C
YDL032W	YCL063W	YDL032W		YKL127W	YNL333W	YNL333W		YJL190C	YNL146C-A	YNL146C-A		YER112W	YPR101W	YPR101W																		YOR169C
YLR463C	YML083C	YLR463C		YOL134C	YLR402W	YLR402W		YLR101C	YNL024C-A	YNL024C-A		YOL149W	YDR461C-A	YDR461C-A																		YHR125W
YGL028C	YOL134C	YGL028C		YOR373W	YJR005C-A	YJR005C-A		YIR005W	YOR287C	YOR287C		YOR279C	YIL105W-A	YIL105W-A																		YEL073C
YLR458W	YBR098W	YLR458W		YJL028W	YLR334C	YLR334C		YER131W	YNL259C	YNL259C		YGL041W-A	YBR268W	YBR268W																		YNL033W
YHR028W-A	YNL236W	YHR028W-A		YGR109C	YJR150C	YJR150C		YMR316C-A	YNL157W	YNL157W		YJL030W	YOR123C	YOR123C																		YLR342W-A
YNR009W	YMR001C	YNR009W		YDR213W	YNR009W	YNR009W		YJR057W	YER131W	YER131W		YDR058C	YCR095C	YCR095C																		Q0160
YDR521W	YLR086W	YDR521W		YBL085W	YNR050C	YNR050C		YLR222C-A	YDR286C	YDR286C		YGR215W	YGR187C	YGR187C																		YNL205C
YER104W	YHR018C	YER104W		YDR501W	YGL188C-A	YGL188C-A		YNL157W	YOR193W	YOR193W		YPR108W	YHR005C-A	YHR005C-A																		YJL156W-A
YBR224W	YOR156C	YBR224W		YHR193C-A	YMR189W	YMR189W		YOR193W	YJL009W	YJL009W		YIL105W-A	YLR062C	YLR062C																		YGR139W
YAR035W	YNL233W	YAR035W		YOR348C	YIL141W	YIL141W		YMR107W	YCL055W	YCL055W		YPR101W	YOR249C	YOR249C																		YOR139C
YLR235C	YBR146W	YLR235C		YJL118W	YLR458W	YLR458W		YJL009W	YOR170W	YOR170W		YCL055W	YKL053C-A	YKL053C-A																		YER023C-A
YBR113W	YBL074C	YBR113W		YHR178W	YHR093W	YHR093W		YDR286C	YBR257W	YBR257W		YLR146W-A	YML001W	YML001W																		YMR082C
YEL030W	YJL214W	YEL030W		YFL059W	YGR022C	YGR022C		YNL024C-A	YBR096W	YBR096W		YBR268W	YGL164C	YGL164C																		YGL261C
YBR156C	YDR146C	YBR156C		YPL250W-A	YLR183C	YLR183C		YML108W	YDR399W	YDR399W		YOR123C	YGR232W	YGR232W																		YDR442W
YDR507C	YDL041W	YDR507C		YLL040C	YAR035W	YAR035W		YKL013C	YDR168W	YDR168W		YCR095C	YJR050W	YJR050W																		YER085C
YJL078C	YLR234W	YJL078C		YDL062W	YBL031W	YBL031W		YBR096W	YPR158W	YPR158W		YHR005C-A	YGR063C	YGR063C																		YDR464C-A
YIL131C	YMR190C	YIL131C		YDR344C	YNL120C	YNL120C		YNL259C	YDL157C	YDL157C		YHR087W	YDR302W	YDR302W																		YCR045W-A
YER078W-A	YKR097W	YER078W-A		YBR232C	YIL131C	YIL131C		YCL055W	YKL169C	YKL169C		YOR249C	YPR020W	YPR020W																		YLR222C-A
YKR033C	YGL024W	YKR033C		YAL045C	YNL017C	YNL017C		YNL146C-A	YKL013C	YKL013C		YPR020W	YDL157C	YDL157C																		Q0142
YBR089W	YBR232C	YBR089W		YMR001C	YNL332W	YNL332W		YPR158W	YLR222C-A	YLR222C-A		YGR187C	YER012W	YER012W																		YPR160C-A
YDL022C-A	YJL187C	YDL022C-A		YPR096C	YBR089W	YBR089W		YOR287C	YBR108W	YBR108W		YGR232W	YHR087W	YHR087W																		YHR032C-A
YLR402W	YOR073W	YLR402W		YHL031C	YER078W-A	YER078W-A		YOR170W	YLL038C	YLL038C		YKL053C-A	YMR173W-A	YMR173W-A																		YNL130C-A
YPL044C	YHR099W	YPL044C		YJR146W	YOL007C	YOL007C		YDR168W	YPR035W	YPR035W		YML001W	YGR087C	YGR087C																		YIL105W-A
YJR150C	YHL030W-A	YJR150C		YLR437C-A	YOR301W	YOR301W		YDL157C	YIR034C	YIR034C		YER012W	YER104W	YER104W																		Q0080
YLR286C	YGL216W	YLR286C		YGL045W	YDR269C	YDR269C		YBR257W	YOL058W	YOL058W		YDL157C	YLR122C	YLR122C																		YFL065C
YBL031W	YOR141C	YBL031W		YLR142W	YMR144W	YMR144W		YKL169C	YDR009W	YDR009W		YJR050W	YOR084W	YOR084W																		YFL064C
YDR014W-A	YLR217W	YDR014W-A		YPL127C	YOR025W	YOR025W		YDR399W	YPR115W	YPR115W		YGR063C	YHR032W-A	YHR032W-A																		YAR064W
YMR144W	YGR203W	YMR144W		YOL082W	YDL096C	YDL096C		YLR023C	YKL107W	YKL107W		YLR062C	YMR096W	YMR096W																		YJL032W
YMR189W	YOR373W	YMR189W		YOR316C-A	YDR355C	YDR355C		YPL104W	YNL139C	YNL139C		YDR302W	YPL040C	YPL040C																		YPR076W
YEL009C-A	YOR107W	YEL009C-A		YEL019C	YAL024C	YAL024C		YJL020W-A	YLR121C	YLR121C		YGL164C	YLR377C	YLR377C																		YIR040C
YER165C-A	YDL196W	YER165C-A		YDL196W	YHR126C	YHR126C		YKL042W	YER069W	YER069W		YMR173W-A	YNL106C	YNL106C																		YPR077C
YDL151C	YOR331C	YDL151C		YPR177C	YEL059W	YEL059W		YKL161C	YGL205W	YGL205W		YOR162C	YBL074C	YBL074C																		YER014C-A
YNL296W	YCR101C	YNL296W		YIL150C	YDR014W-A	YDR014W-A		YGL209W	YPL103C	YPL103C		YER052C	YGL216W	YGL216W																		YLR462W
YDR278C	YDR123C	YDR278C		YBR049C	YDR526C	YDR526C		YIL037C	YIL146C	YIL146C		YHR155W	YPL016W	YPL016W																		YDL247W
YLR123C	YJR128W	YLR123C		YBL074C	YER165C-A	YER165C-A		YNR031C	YBR213W	YBR213W		YHR091C	YBR213W	YBR213W																		YLL067C
YOR025W	YGR146C-A	YOR025W		YER079C-A	YDL151C	YDL151C		YDL171C	YPR119W	YPR119W		YGR221C	YER065C	YER065C																		YEL075W-A
YAL024C	YNR073C	YAL024C		YGR142W	YEL076C	YEL076C		YDL210W	YOR345C	YOR345C		YIL056W	YER172C	YER172C																		YFL034C-A
YIL141W	YGL174W	YIL141W		YBR130C	YAL059C-A	YAL059C-A		YER176W	YOR192C	YOR192C		YOR171C	YLR255C	YLR255C
YNL120C	YBR065C	YNL120C		YMR094W	YEL009C-A	YEL009C-A		YPR168W	YDR270W	YDR270W		YLR086W	YGL007W	YGL007W
YER038W-A	YDR360W	YER038W-A		YOR041C	YDR053W	YDR053W		YIR027C	YGR189C	YGR189C		YKL022C	YPL115C	YPL115C
YOR301W	YEL067C	YOR301W		YMR166C	YJL195C	YJL195C		YBR241C	YLL059C	YLL059C		YJL051W	YKL185W	YKL185W
YEL076C	YHL031C	YEL076C		YPR150W	YLR123C	YLR123C		YLR256W	YBL009W	YBL009W		YKL198C	YDR402C	YDR402C
YDR355C	YFR035C	YDR355C		YOR035C	YNL296W	YNL296W		YMR001C	YDR545W	YDR545W		YAL054C	YER144C	YER144C
YOL007C	YCR049C	YOL007C		YLR045C	YER068C-A	YER068C-A		YLR162W-A	YLR467W	YLR467W		YOR389W	YER095W	YER095W
YNR067C	YNR062C	YNR067C		YGR146C	YHR218W	YHR218W		YKL147C	YOR396W	YOR396W		YGR197C	YLR183C	YLR183C
YLL066W-B	YAL045C	YLL066W-B		YLR338W	YHR165W-A	YHR165W-A		YBR007C	YOR290C	YOR290C		YCL046W	YBL071W-A	YBL071W-A
YER190W	YER153C	YER190W		YML083C	YDR278C	YDR278C		YOR326W	YMR031W-A	YMR031W-A		YMR306C-A	YMR198W	YMR198W
YAL059C-A	YLR357W	YAL059C-A		YNL328C	YDR149C	YDR149C		YGR256W	YNL329C	YNL329C		YGR055W	YLR063W	YLR063W
YDL096C	YGR067C	YDL096C		YOR073W-A	YEL032C-A	YEL032C-A		YDR234W	YIL162W	YIL162W		YNR027W	YOR072W	YOR072W
YDR526C	YPL124W	YDR526C		YNL310C	YKR033C	YKR033C		YDL087C	YHR178W	YHR178W		YLR378C	YOR083W	YOR083W
YNL327W	YMR198W	YNL327W		YLL024C	YPL223C	YPL223C		YPL163C	YFR019W	YFR019W		YER167W	YML037C	YML037C
YGR022C	YDR214W	YGR022C		YMR032W	YDR542W	YDR542W		YLR112W	YBL074C	YBL074C		YGR041W	YHL018W	YHL018W
YHR218W	YMR183C	YHR218W		YGR140W	YLR465C	YLR465C		YDR113C	YBR109W-A	YBR109W-A		YBL088C	YPR106W	YPR106W
YER124C	YML091C	YER124C		YGL174W	YHL049C	YHL049C		YER015W	YDR443C	YDR443C		YDR443C	YMR095C	YMR095C
YHR093W	YGL081W	YHR093W		YBL002W	YKL224C	YKL224C		YBR114W	YML037C	YML037C		YIL129C	YJR053W	YJR053W
YIL134C-A	YAL064W-B	YIL134C-A		YEL030W	YER190W	YER190W		YPR152C	YPL115C	YPL115C		YDL037C	YBR294W	YBR294W
YGL217C	YLR353W	YGL217C		YPL222W	YBR072W	YBR072W		YEL032W	YIL129C	YIL129C		YHR109W	YCR067C	YCR067C
YDR149C	YDR022C	YDR149C		YGR203W	YIR017W-A	YIR017W-A		YIL109C	YGL146C	YGL146C		YER015W	YHL016C	YHL016C
YDR053W	YGL254W	YDR053W		YIR017C	YJL175W	YJL175W		YKL171W	YBR124W	YBR124W		YHR176W	YJL084C	YJL084C
YLR465C	YIL066W-A	YLR465C		YBL109W	YOL046C	YOL046C		YER091C	YGR108W	YGR108W		YJR140C	YMR163C	YMR163C
YER068C-A	YIR017C	YER068C-A		YBR051W	YOR325W	YOR325W		YGR269W	YNR072W	YNR072W		YKR073C	YAR042W	YAR042W
YOL046C	YBR049C	YOL046C		YDL240W	YAL004W	YAL004W		YFL021W	YMR094W	YMR094W		YJL120W	YIR023W	YIR023W
YHL049C	YGL007W	YHL049C		YPL036W	YNL339C	YNL339C		YBL007C	YFL021C-A	YFL021C-A		YOR201C	YER068W	YER068W
YIR017W-A	YPL127C	YIR017W-A		YNR067C	YEL077W-A	YEL077W-A		YNL191W	YDL141W	YDL141W		YPL089C	YIL117C	YIL117C
YEL032C-A	YGL152C	YEL032C-A		YLR353W	YFL041W-A			YLR116W	YDR038C	YDR038C		YNL049C	YJR106W	YJR106W
YJL175W	YJL118W	YJL175W		YOL052C-A	YML047W-A			YOR141C	YKR045C	YKR045C		YJL130C	YDL141W	YDL141W
YOR325W	YBL109W	YOR325W		YGL088W	YDR281C			YNL233W	YOR050C	YOR050C		YBL014C	YLR428C	YLR428C
YAL004W	YLR334C	YAL004W		YKL178C	YKL219W			YNL053W	YGR061C	YGR061C		YBL007C	YBR296C	YBR296C
YNL339C	YGL188C-A	YNL339C		YPR119W	YBR058C-A			YMR317W	YDR457W	YDR457W		YER041W	YKL178C	YKL178C
YNL097W-A	YDR193W			YPL124W	YOL159C			YGR133W	YNR066C	YNR066C		YLR450W	YLR092W	YLR092W
YBR099C	YFL012W-A			YBR180W	YNL009W			YMR254C	YOL156W	YOL156W		YDL214C	YMR084W	YMR084W
YIL177C	YCR095W-A			YMR169C	YFL028C			YNR008W	YLR063W	YLR063W		YBR133C	YLR132C	YLR132C
YML009W-B	YGR204W			YNL191W	YLR107W			YER017C	YLR245C	YLR245C		YNL104C	YOR306C	YOR306C
YDR406W-A	YPL261C			YBR117C	YGR169C-A			YJL201W	YAL021C	YAL021C		YML066C	YNL262W	YNL262W
YNL319W	YIL150C			YLR136C	YJL136C			YML057C-A	YGL064C	YGL064C		YBR114W	YAR019W-A	YAR019W-A
YIL162W	YNL333W			YNL300W	YGR074W			YDL197C	YKR041W	YKR041W		YLL035W	Q0120	Q0120
YLR415C	YJL019W			YJR160C	YER026C			YJL102W	YBL065W	YBL065W		YJL043W	YEL061C	YEL061C
YNL058C	YCR064C			YDR146C	YNL162W-A			YOR098C	YDR538W	YDR538W		YGR096W	YOR156C	YOR156C
YOR077W	YAL064C-A			YPR125W	YFR004W			YNL334C	YBL070C	YBL070C		YBL100C	YIL046W	YIL046W
YJR109C	YOR035C			YLR122C	YDL007W			YAL053W	YLR255C	YLR255C		YKL212W	YOL155C	YOL155C
YNL287W	YMR094W			YBR182C	YGR101W			YER033C	YGR140W	YGR140W		YDR242W	YGL240W	YGL240W
YHR155W	YNL310C			YFR046C	YGR222W			YCR081W	YJL121C	YJL121C		YGR097W	YBR295W	YBR295W
YPR141C	YPL158C			YLR210W	YPR002C-A			YML089C	YLR187W	YLR187W		YLR228C	YDR314C	YDR314C
YPL137C	YMR306C-A			YLR273C	YLR147C			YCR033W	YGL239C	YGL239C		YGL208W	YER039C	YER039C
YPL223C	YEL019C			YJL045W	YBR175W			YKL022C	YOR077W	YOR077W		YDL117W	YGL197W	YGL197W
YMR032W	YGR142W			YGL153W	YPL139C			YLR035C	YHR214W-A	YHR214W-A		YPR194C	YGL175C	YGL175C
YCR106W	YLR210W			YDR070C	YPR198W			YBR295W	YDL182W	YDL182W		YJR091C	YNL277W	YNL277W
YLR084C	YNR005C			YBR098W	YOL013W-B			YLR228C	YNL034W	YNL034W		YKL203C	YDR457W	YDR457W
YER111C	YJR146W			YJR092W	YHR012W			YLL056C	YLR092W	YLR092W		YHR182W	YHR094C	YHR094C
YPR177C	YDL062W			YML057C-A	YLR010C			YPL221W	YPR032W	YPR032W		YNR011C	YLR213C	YLR213C
YML037C	YDL117W			YGL175C	YNR055C			YCL041C	YHR096C	YHR096C		YBR291C	YER105C	YER105C
YLR431C	YDL240W			YOL110W	YPR134W			YLL061W	YPL040C	YPL040C		YIL102C	YGR217W	YGR217W
YLR091W	YDR113C			YDR024W	YJL001W			YKL212W	YPR192W	YPR192W		YDR150W	YOR077W	YOR077W
YNL198C	YJL182C			YLR377C	YPL002C			YGR288W	YKL163W	YKL163W		YNL203C	YER033C	YER033C
YOR268C	YMR166C			YJL019W	YHR049C-A			YDL214C	YNL282W	YNL282W		YGL209W	YEL017W	YEL017W
YPL253C	YLR273C			YNL117W	YBR024W			YHR079C	YJL219W	YJL219W		YIR034C	YAL021C	YAL021C
YBR152W	YPR096C			YMR198W	YER117W			YHR091C	YDR536W	YDR536W		YHR206W	YNL139C	YNL139C
YPL115C	YNL338W			YCR095W-A	YNL038W			YKR103W	YPL027W	YPL027W		YBR124W	YER086W	YER086W
YPL240C	YBR072W			YCL063W	YBL040C			YAR073W	YGL131C	YGL131C		YHR096C	YLR047C	YLR047C
YLR255C	YJL108C			YGL041C	YOR312C			YGR221C	YCL063W	YCL063W		YOR112W	YOR153W	YOR153W
YBL002W	YOR264W			YDL085W	YKL009W			YJL222W	YGL216W	YGL216W		YHR212W-A	YLR416C	YLR416C
YGR152C	YFR046C			YBR190W	YDR276C			YOR072W	YOL081W	YOL081W		YPR034W	YJL095W	YJL095W
YGR259C	YML057C-A			YDR193W	YOR261C			YCR065W	YLL051C	YLL051C		YMR317W	YER119C-A	YER119C-A
YLR021W	YGR109C			YDL003W	YNL146W			YFL011W	YGL197W	YGL197W		YER087W	YCR093W	YCR093W
YPL032C	YGR140W			YDL041W	YLR421C			YGR096W	YEL069C	YEL069C		YEL070W	YAL053W	YAL053W
YKL036C	YDR488C			YKL036C	YHL034W-A			YJR033C	YOR083W	YOR083W		YNL054W	YML027W	YML027W
YGL071W	YBR158W			YIL057C	YJL188C			YCL030C	YNL095C	YNL095C		YBR033W	YBL070C	YBL070C
YGR179C	YMR069W			YDR113C	YLR456W			YLR419W	YEL030W	YEL030W		YHR186C	YEL046C	YEL046C
YOR146W	YBR190W			YMR175W	YCL066W			YJL089W	YGR290W	YGR290W		YHR178W	YER019W	YER019W
YMR280C	YGL153W			YHL030W-A	YCR040W			YLR049C	YBR162C	YBR162C		YNL236W	YKL029C	YKL029C
YDL127W	YNR040W			YNL072W	YHR181W			YLR305C	YML042W	YML042W		YOR347C	YBR072W	YBR072W
YMR315W	YLL024C			YNR040W	YER050C			YAR031W	YBR065C	YBR065C		YIL158W	YKL038W	YKL038W
YLR052W	YNL104C			YJR053W	YDR288W			YNR011C	Q0120	Q0120		YBL009W	YBR224W	YBR224W
YOR250C	YLL040C			YPL044C	YMR230W			YFL059W	YAR042W	YAR042W		YER027C	YAR068W	YAR068W
YBR117C	YGR041W			YDR488C	YDL009C			YJL120W	YEL019C	YEL019C		YGR190C	YER166W	YER166W
YGR098C	YLR236C			YIR018W	YPL130W			YIL153W	YEL035C	YEL035C		YPR039W	YFR034C	YFR034C
YLR438W	YNL300W			YHR028W-A	YGL044C			YBR212W	YPL155C	YPL155C		YBR218C	YIL173W	YIL173W
YPL222W	YNL078W			YGR108W	YDR427W			YKL165C	YNL106C	YNL106C		YLR024C	YNL095C	YNL095C
YGR237C	YLR385C			YJL182C	YDR058C			YOL070C	YHR032W-A	YHR032W-A		Q0140	YPL027W	YPL027W
YDL223C	YPR125W			YMR163C	YKR088C			YBR038W	YER060W	YER060W		YMR316C-B	YPR032W	YPR032W
YOR275C	YBR130C			YDR451C	YPR094W			YOR363C	YDR451C	YDR451C		YKR105C	Q0070	Q0070
YNL033W	YNL289W			YNL289W	YIL014W			YML083C	YCR093W	YCR093W		YML052W	YJL092W	YJL092W
YHL006W-A	YOR041C			YIL142C-A	YJL006C			YPL180W	YER065C	YER065C		YPR159W	YDL138W	YDL138W
YHR154W	YPL141C			YLR385C	YKR026C			YLR124W	YCR068W	YCR068W		YDR215C	YBR065C	YBR065C
YHR036W	YDL003W			YDR022C	YFL017C			YML013W	YMR096W	YMR096W		YDL039C	YJR129C	YJR129C
YJL184W	YNL072W			YPL073C	YDR051C			YMR204C	YMR120C	YMR120C		YNR060W	YLL059C	YLL059C
YIL140W	YBL013W			YGL081W	YLR306W			YDR506C	YPR116W	YPR116W		YAL064W-B	YPR145W	YPR145W
YOR378W	YOL085C			YMR120C	YBR233W-A			YJR031C	YKL185W	YKL185W		YKR034W	YDR507C	YDR507C
YCR081W	YJL107C			YFR036W	YJL189W			YIL022W	YKL127W	YKL127W		YPL103C	YFL021C-A	YFL021C-A
YHR182W	YHR172W			YLL032C	YPL149W			YNR040W	YHL040C	YHL040C		YLR403W	YBR240C	YBR240C
YLL018C-A	YDR344C			YHR172W	YKR039W			YHR212C	YMR198W	YMR198W		YLL032C	YMR144W	YMR144W
YBR180W	YGL175C			YHR139C	YLR367W			YAR060C	YOR011W	YOR011W		YLR120C	YNL282W	YNL282W
YJR140C	YJR053W			YBR157C	YKR057W			YIL031W	YCR006C	YCR006C		YHL006C	YGL064C	YGL064C
YDR024W	YFL064C			YML133C	YDR079W			YDR144C	YMR163C	YMR163C		YER013W	YOR129C	YOR129C
YMR186W	YJL020W-A			YPL141C	YPL220W			YLR413W	YJL214W	YJL214W		YOR188W	YNR005C	YNR005C
YPL233W	YIR018W			YBR124W	YPL148C			YDR146C	YLR086W	YLR086W		YDL087C	YOR381W	YOR381W
YAR047C	YDR451C			YMR199W	YDR514C			YOL138C	YLR313C	YLR313C		YNL152W	YDR095C	YDR095C
YMR179W	YLL032C			YPL256C	YPR071W			YPR034W	YOR388C	YOR388C		YGR098C	YNL014W	YNL014W
YAL003W	YNL066W			YFL058W	YOR118W			YML072C	YLL025W	YLL025W		YNL221C	YNR066C	YNR066C
YOR027W	YNL191W			YNL327W	YER148W			YIL026C	YOR026W	YOR026W		YJR127C	YOL085C	YOL085C
YOR371C	YEL066W			YML109W	YLR443W			YER149C	YCR067C	YCR067C		YDR359C	YNR056C	YNR056C
YIL026C	YGL235W			YDL032W	YGR037C			YHR186C	YDR213W	YDR213W		YBL012C	YLR286C	YLR286C
YLR122C	YMR199W			YMR307C-A	YCL048W-A			YDL245C	YOR035C	YOR035C		YBL016W	YHR214W-A	YHR214W-A
YCL014W	YER079C-A			YDR521W	YHR089C			YBR197C	YFR054C	YFR054C		YOR191W	YOR247W	YOR247W
YGL043W	YBL071W-A			YGL235W	YLR265C			YNL161W	YKL197C	YKL197C		YJL100W	YNR009W	YNR009W
YGL035C	YMR163C			YOR314W	YGL168W			YLR131C	YJR154W	YJR154W		YGL096W	YOR050C	YOR050C
YKL097C	YNL328C			YDL182W	YDR013W			YNR050C	YKL101W	YKL101W		YLR136C	YAR047C	YAR047C
YJL076W	YHR143W			YGR146C-A	YKR068C			YPR009W	YDL127W	YDL127W		YER018C	YGL125W	YGL125W
YNL187W	YBR124W			YBR224W	YCR082W			YDR442W	YAR019W-A	YAR019W-A		YMR204C	YJL052W	YJL052W
YDL155W	YML109W			YKR097W	YGR035C			YGR201C	YPL258C	YPL258C		YJR138W	YEL067C	YEL067C
YDR246W	YOR263C			YLR463C	YLR154W-F			YJL043W	YGL045W	YGL045W		YLR303W	YDL220C	YDL220C
YER149C	YLR338W			YER038W-A	YKL033W-A			YAR015W	YDL238C	YDL238C		YKL068W	YPR202W	YPR202W
YJL127W-A	YFR036W			YJL107C	YDR328C			YGL060W	Q0075	Q0075		YLR106C	YLL040C	YLL040C
YBR136W	YIL142C-A			YBR266C	YJL055W			YLR024C	YLL024C	YLL024C		YBR197C	YJL172W	YJL172W
YOR202W	YEL059W			YJR150C	YLR146W-A			YCL046W	YCR048W	YCR048W		YLR071C	YNL240C	YNL240C
YML027W	YLR437C-A			YLL066W-B	YPL225W			YMR109W	YOL011W	YOL011W		YNR072W	YMR031W-A	YMR031W-A
YLR045C	YOR055W			YNL285W	YER188W			YGL137W	YLL018C-A	YLL018C-A		YLR414C	YGL131C	YGL131C
YIR023W	YPL256C			YDR507C	YCR041W			YPL089C	YPL016W	YPL016W		YFR056C	YLR245C	YLR245C
YER034W	YGL218W			YLR402W	YPL010W			YML029W	YPR106W	YPR106W		YGR134W	YKR097W	YKR097W
YDL033C	YLR183C			YBR156C	YGR284C			YER089C	YGR203W	YGR203W		YHR103W	YMR199W	YMR199W
YBR223C	YGL028C			YER104W	YHR063W-A			YBL014C	YNR063W	YNR063W		YNL310C	YLL024C	YLL024C
YPR145W	YPL073C			YER124C	YBR022W			YPR145W	YPL162C	YPL162C		YCL009C	YLR190W	YLR190W
YDR480W	YJL195C			YBL071W-A	YPR146C			YDR141C	YBR070C	YBR070C		YLR353W	YLL025W	YLL025W
YBL065W	YLR458W			YNL333W	YHL011C			YOR351C	YBL073W	YBL073W		YBL066C	YJR078W	YJR078W
YHR071W	YHR028W-A			YER078W-A	YDR399W			YKR105C	YOR129C	YOR129C		YOR192C	YEL030W	YEL030W
YLR364W	YLR463C			YLR334C	YGR131W			YPL134C	YDL223C	YDL223C		YPR115W	YJL153C	YJL153C
YPL162C	YDL032W			YJR005C-A	YGL220W			YDL114W	YML027W	YML027W		YLR342W	YNL289W	YNL289W
YGR160W	YAR035W			YNR009W	YGR105W			YHR129C	YGL063W	YGL063W		YBL082C	YDR213W	YDR213W
YGR146C	YNR009W			YNL332W	YBR076W			YFL061W	YBR224W	YBR224W		YFR019W	YDL240W	YDL240W
YLR428C	YBR224W			YIL141W	YPL038W-A			YBL071W-A	YEL053W-A	YEL053W-A		YMR122W-A	YPR009W	YPR009W
YPL262W	YER104W			YMR189W	YLR262C			YMR280C	YJL135W	YJL135W		YNL117W	YER149C	YER149C
YDR462W	YDR521W			YLR183C	YMR263W			YLR188W	YLR037C	YLR037C		YKL164C	YDR309C	YDR309C
YDR501W	YEL030W			YGL188C-A	YNL153C			YNR056C	YJR092W	YJR092W		YER114C	YLR023C	YLR023C
YLR115W	YBR113W			YNR050C	YDR374W-A			YLR174W	YHR102W	YHR102W		YMR001C	YFR021W	YFR021W
YLR087C	YGR022C			YNL120C	YAR071W			YLR094C	YEL009C-A	YEL009C-A		YOR396W	YBL073W	YBL073W
YBR221C	YJL078C			YLR458W	YDR481C			YDR089W	YKL031W	YKL031W		YLR467W	YOR107W	YOR107W
YKL161C	YBR156C			YBR089W	YER046W-A			YDL196W	YIL155C	YIL155C		YDR545W	YDL229W	YDL229W
YDR158W	YDR507C			YDR269C	YOL129W			YNL201C	YIL173W	YIL173W		YPL222W	YMR190C	YMR190C
YMR042W	YIL131C			YBL031W	YHR140W			YPR007C	YBR072W	YBR072W		YMR265C	YER032W	YER032W
YFL039C	YLR235C			YAR035W	YPL189C-A			YMR273C	YOR371C	YOR371C		YER164W	YIL140W	YIL140W
YPL250W-A	YPL044C			YIL131C	YBR062C			YNL240C	YDR402C	YDR402C		YIL146C	YOL156W	YOL156W
YPL104W	YLR286C			YNL017C	YDR177W			YGR190C	Q0045	Q0045		YNL053W	YPL155C	YPL155C
YNL073W	YER078W-A			YOL007C	YNL010W			YNL104C	YNL203C	YNL203C		YOR299W	Q0075	Q0075
YDL040C	YBL031W			YOR301W	YDR492W			YIL125W	YNL279W	YNL279W		YAL043C	YMR279C	YMR279C
YNR056C	YLR402W			YEL059W	YEL073C			YER152C	YFR021W	YFR021W		YJL042W	YNR063W	YNR063W
YOL110W	YJR150C			YDL096C	YJL104W			YBR218C	YCL026C-A	YCL026C-A		YCR045C	YOL081W	YOL081W
YDR116C	YBR089W			YDR355C	YDR034C-A			YNR060W	YOR247W	YOR247W		YGR140W	YNR062C	YNR062C
YMR036C	YDL022C-A			YDR526C	YPL197C			YER119C-A	Q0050	Q0050		YDL182W	YLR045C	YLR045C
YGL183C	YDR014W-A			YEL076C	YMR039C			YOR264W	Q0070	Q0070		YDR384C	YER044C-A	YER044C-A
YJL028W	YKR033C			YMR144W	YBR129C			YPL062W	YNR073C	YNR073C		YJR109C	YMR057C	YMR057C
YJL026C-A	YMR144W			YDR014W-A	YOR094W			YAL048C	YNL018C	YNL018C		YKL197C	YEL066W	YEL066W
YMR024W	YMR189W			YAL024C	YML063W			YOR372C	YIL006W	YIL006W		YLR099C	YLR393W	YLR393W
YDR422C	YDL151C			YHR126C	YOR055W			YMR322C	YDR437W	YDR437W		YPL231W	YOR371C	YOR371C
YBR182C	YER165C-A			YOR025W				YGL254W	YAR068W	YAR068W		YDR127W	YIR018W	YIR018W
YAL069W	YDR278C			YER165C-A				YOR296W	Q0250	Q0250		YJL157C	YFR022W	YFR022W
YPR126C	YIL134C-A			YDL151C				YGL125W	YLR357W	YLR357W		YJL027C	YIL160C	YIL160C
YFL063W	YEL009C-A			YAL059C-A				YDL224C	YNR069C	YNR069C		YNL201C	YPL162C	YPL162C
YCR108C	YHR093W			YEL009C-A				YBR049C	YBR180W	YBR180W		YAR018C	YLR187W	YLR187W
YHR193C-A	YOR025W			YJL195C				YNL072W	YDR014W-A	YDR014W-A		YER024W	YBR038W	YBR038W
YFL058W	YAL024C			YLR123C				YJR098C	YJL095W	YJL095W		YEL025C	YNL105W	YNL105W
YCL026C-B	YNL120C			YNL296W				YJR066W	YLR353W	YLR353W		YPL017C	YPL258C	YPL258C
YNL028W	YNL296W			YER068C-A				YKL203C	YIR018W	YIR018W		YJR066W	YLL056C	YLL056C
YOR316C-A	YIL141W			YHR093W				YLR422W	YAR050W	YAR050W		YAL031C	YEL032W	YEL032W
YMR307C-A	YOR301W			YGR022C				YBR291C	YPL127C	YPL127C		YPR030W	YNL283C	YNL283C
YNL332W	YLR123C			YKR033C				YAL031C	YNL078W	YNL078W		YLR205C	YPL221W	YPL221W
YBR266C	YNR067C			YHR218W				YDR384C	YDR093W	YDR093W		YGR061C	YCR049C	YCR049C
YHR165W-A	YDR355C			YLR465C				YOR074C	YOR156C	YOR156C		YHR070W	YGR144W	YGR144W
YOR248W	YGL217C			YDR149C				YHR103W	YGR041W	YGR041W		Q0110	YDL170W	YDL170W
YGR122C-A	YOL007C			YDR278C				YHR155W	YLR047C	YLR047C		YML102W	YDL238C	YDL238C
YJR140W-A	YER038W-A			YPL223C				YMR057C	YIR023W	YIR023W		YBR261C	YLR112W	YLR112W
YEL075W-A	YDR053W			YJR140W-A				YIR014W	YIL013C	YIL013C		YOL100W	YOR384W	YOR384W
YGL261C	YLL066W-B			YER190W				YCR073C	YLR142W	YLR142W		YEL073C	YBR136W	YBR136W
YKL224C	YEL076C			YBR072W				YMR244W	YOR384W	YOR384W		YMR166C	YPL127C	YPL127C
YHR056W-A	YER190W			YDR053W				YPL137C	YJL158C	YJL158C		YCL063W	YLR357W	YLR357W
YIL021C-A	YAL059C-A			YOR248W				YKL148C	YGR109C	YGR109C		YMR042W	YKL163W	YKL163W
YHL050W-A	YNL327W			YHR165W-A				YNR005C	YDL033C	YDL033C		YDR431W	YER003C	YER003C
	YDL096C			YEL032C-A				YNL152W	YNL210W	YNL210W		YER064C	YEL063C	YEL063C
	YDR526C			YIL021C-A				YNL054W	YJL045W	YJL045W		YBL105C	YLR058C	YLR058C
	YER124C			YDR542W				YMR162C	YPR001W	YPR001W		YHR123W	YBL065W	YBL065W
	YHR218W			YHL049C				YLR115W	YKL029C	YKL029C		YJL135W	YER028C	YER028C
	YDR149C			YKL224C				YGR134W	YKL178C	YKL178C		YBR162C	YDR355C	YDR355C
	YLR465C			YHL050W-A				YJR138W	YIL047C	YIL047C		YER165W	YDR270W	YDR270W
	YHL049C			YHR056W-A				YPL153C	YCR049C	YCR049C		YAL048C	YGR177C	YGR177C
	YIR017W-A			YOL046C				YDL138W	YMR095C	YMR095C		YJL127W-A	YEL049W	YEL049W
	YEL032C-A			YIR017W-A				YML031C-A	YDL240W	YDL240W		YNL321W	YER017C	YER017C
	YER068C-A			YJL175W				YNL126W	YLR379W	YLR379W		YNL142W	YPL141C	YPL141C
	YJL175W			YEL077W-A				YJL127W-A	YHR094C	YHR094C		YPR164W	YJL107C	YJL107C
	YOR325W			YOR325W				YBL002W	YBR019C	YBR019C		YDR536W	YJL187C	YJL187C
	YOL046C			YAL004W				YLR071C	YJR160C	YJR160C		YKL127W	YJR092W	YJR092W
	YAL004W			YNL339C				YDR309C	YPL141C	YPL141C		YER116C	YCR068W	YCR068W
	YNL339C							YHR109W	YNL102W	YNL102W		YER152C	YDR146C	YDR146C
								YKR090W	YNL187W	YNL187W		YOR375C	YLL018C-A	YLL018C-A
								YJL172W	YLR393W	YLR393W		YJL109C	YKL031W	YKL031W
								YLR398C	YCR106W	YCR106W		YGL254W	YKR045C	YKR045C
								YPL209C	YJL108C	YJL108C		YDR123C	YOR011W	YOR011W
								YOR306C	YGR204W	YGR204W		YOR026W	YHR102W	YHR102W
								YHL018W	YPL085W	YPL085W		YDR538W	YER061C	YER061C
								YJR030C	YJR053W	YJR053W		YJL222W-B	YPR096C	YPR096C
								YER061C	YNL333W	YNL333W		YPL164C	YNL270C	YNL270C
								YKL068W	YBR208C	YBR208C		YHR098C	YNL018C	YNL018C
								YLR210W	YJL076W	YJL076W		YBR220C	YPR116W	YPR116W
								YGR068C	YLR428C	YLR428C		YIL006W	YPR153W	YPR153W
								YDR127W	YNL262W	YNL262W		YMR307W	YNL279W	YNL279W
								YGR212W	YLR123C	YLR123C		YDR216W	YNL269W	YNL269W
								YMR078C	YJL083W	YJL083W		YER062C	YDL151C	YDL151C
								YGL156W	YHR173C	YHR173C		YDL224C	YDR093W	YDR093W
								YPL116W	YNL117W	YNL117W		YBR108W	YJL121C	YJL121C
								YIL117C	YPR096C	YPR096C		YCR095W-A	YIL029W-A	YIL029W-A
								YBL100C	YJL092W	YJL092W		YGL236C	YER060W	YER060W
								YJR129C	YBR136W	YBR136W		YNL078W	YLR180W	YLR180W
								YDR509W	YNL283C	YNL283C		YLR124W	YJL078C	YJL078C
								YNL277W-A	YLR213C	YLR213C		YDL171C	YER089C	YER089C
								YER028C	YMR199W	YMR199W		YOR290C	YPR119W	YPR119W
								YPL194W	YAR047C	YAR047C		YJR154W	YGR203W	YGR203W
								YBR102C	YLR084C	YLR084C		YDR422C	YDR437W	YDR437W
								YDL109C	YFR029W	YFR029W		YKL070W	YML109W	YML109W
								YIR028W	YHR131W-A	YHR131W-A		YGL184C	YFR029W	YFR029W
								YMR106C	YDR455C	YDR455C		Q0115	YCR048W	YCR048W
								YDL023C	YNR009W	YNR009W		YCL041C	YNL187W	YNL187W
								YNR027W	YLR438W	YLR438W		YER176W	YGR189C	YGR189C
								YFL012W-A	YGL175C	YGL175C		YNL191W	YBR113W	YBR113W
								YIR013C	YLR183C	YLR183C		YIL169C	YER069W	YER069W
								YOR191W	YLR058C	YLR058C		YLR131C	YJL076W	YJL076W
								YPR005C	YMR306W	YMR306W		YHR189W	YLR379W	YLR379W
								YLR091W	YMR303C	YMR303C		YGR121C	YJL108C	YJL108C
								YGL240W	YJL107C	YJL107C		YGR212W	YHR213W	YHR213W
								YBL088C	YNL269W	YNL269W		YER093C	YIL150C	YIL150C
								YHR182W	YJL118W	YJL118W		YDL127W	YBR156C	YBR156C
								YHL046W-A	YDL156W	YDL156W		YLR413W	YOR328W	YOR328W
								YER166W	YMR279C	YMR279C		YNR069C	YPL085W	YPL085W
								YJR106W	YOL141W	YOL141W		YKR032W	YDR451C	YDR451C
								YOR112W	YMR144W	YMR144W		YMR058W	YOR035C	YOR035C
								YIL057C	YGR032W	YGR032W		YNL172W	YGL045W	YGL045W
								Q0115	YLL040C	YLL040C		YGL074C	YGL063W	YGL063W
								YPR153W	YNR062C	YNR062C		YBR070C	YAR066W	YAR066W
								YHR189W	YPL222W	YPL222W		YML085C	YMR303C	YMR303C
								YAL043C	YIL140W	YIL140W		YER043C	YGR108W	YGR108W
								YGR177C	YNL289W	YNL289W		YBR223C	YPR035W	YPR035W
								YGR144W	YJL187C	YJL187C		YJL160C	YGL239C	YGL239C
								YOL100W	YCL023C	YCL023C		YLL038C	YGL126W	YGL126W
								YLR416C	YNL014W	YNL014W		YDL156W	YOL011W	YOL011W
								YDL093W	YJL127C	YJL127C		YBR141C	YOR263C	YOR263C
								YEL061C	YMR190C	YMR190C		YNL329C	YLR123C	YLR123C
								YER044C-A	YDR193W	YDR193W		YPL036W	YDR055W	YDR055W
								YML066C	YKR013W	YKR013W		YER104W	YLR415C	YLR415C
								YHL028W	YOR263C	YOR263C		YPR054W	YOR373W	YOR373W
								YJL160C	YPL044C	YPL044C		YGL062W	YEL009C-A	YEL009C-A
								YPR054W	YJL078C	YJL078C		YNL102W	YDR038C	YDR038C
								YDR431W	YCL014W	YCL014W		YLR256W	YDR009W	YDR009W
								YHR048W	YER070W	YER070W		YJR160C	YNL019C	YNL019C
								YDR095C	YCR010C	YCR010C		YER103W	YHR172W	YHR172W
								YOR337W	YAR066W	YAR066W		YHL026C	YEL069C	YEL069C
								YNL277W	YDR507C	YDR507C		YCL023C	YPL111W	YPL111W
								Q0110	YDL220C	YDL220C		YAR050W	YBR019C	YBR019C
								YIL009W	YAL054C	YAL054C		YEL042W	YHL040C	YHL040C
								YGL208W	Q0255	Q0255		YPL137C	YLR087C	YLR087C
								YEL067C	YLR045C	YLR045C		YIL013C	YIL066W-A	YIL066W-A
								YDR221W	YBR134W	YBR134W		YCL037C	YHL046W-A	YHL046W-A
								YLR430W	YBR113W	YBR113W		YLR094C	YLL051C	YLL051C
								YDR263C	YGR067C	YGR067C		YER155C	YJL127C	YJL127C
								YNL105W	YIL066W-A	YIL066W-A		YLR122C	YAL064C-A	YAL064C-A
								YBL097W	YDR537C	YDR537C		YBR089W	YOR316C-A	YOR316C-A
								YML085C	YLR157W-D	YLR157W-D		YPL082C	YCL014W	YCL014W
								YLL032C	YIL029W-A	YIL029W-A		YER090W	YIL131C	YIL131C
								YMR032W	YLR463C	YLR463C		YHR048W	Q0050	Q0050
								YOR162C	YGR014W	YGR014W		YER119C	YCR006C	YCR006C
								YBR275C	YOR348C	YOR348C		YKL101W	YJL083W	YJL083W
								YGL089C	YDR355C	YDR355C		YOR337W	YPL223C	YPL223C
								YDR422C	YOR139C	YOR139C		YOR140W	YDL033C	YDL033C
								YJL084C	YBR190W	YBR190W		YDR502C	YIL047C	YIL047C
								YGL236C	YOR025W	YOR025W		YAR019W-A	YEL019C	YEL019C
								YDL117W	Q0065	Q0065		YEL043W	YPL058C	YPL058C
								YDL247W	YOR328W	YOR328W		YLR183C	YJL118W	YJL118W
								YGR087C	YIL066C	YIL066C		YNL192W	YAL065C	YAL065C
								YER003C	YEL059W	YEL059W		YBR180W	YHR139C	YHR139C
								YBL008W	YLR087C	YLR087C		YFL021W	YBR158W	YBR158W
								YOR084W	YOR373W	YOR373W		YNL106C	YMR032W	YMR032W
								YMR166C	YNL278W	YNL278W		YMR096W	YDR537C	YDR537C
								YGL177W	YJR146W	YJR146W		YOR072W	YDR024W	YDR024W
								YIL046W	YIL160C	YIL160C		YOR084W	YBR190W	YBR190W
								YHR139C	Q0105	Q0105		YBL074C	YJL019W	YJL019W
								YJL215C	YBR156C	YBR156C		YPL040C	YGR204W	YGR204W
								YOR314W	YNL270C	YNL270C		YGL007W	YER132C	YER132C
								YML102W	YOL019W	YOL019W		YER065C	YKR013W	YKR013W
								YNL221C	YER172C-A	YER172C-A		YLR120W-A	YNL300W	YNL300W
								YGR098C	YCR063W	YCR063W		YPL016W	YCR106W	YCR106W
								YNL236W	YDL151C	YDL151C		YLR377C	YOR348C	YOR348C
								YBL105C	YBR182C	YBR182C		YER095W	YLR385C	YLR385C
								YDL229W	YDL034W	YDL034W		YGL216W	YIL066C	YIL066C
								YLR122C	YKR054C	YKR054C		YNL034W	YEL008W	YEL008W
								YER184C	YDR024W	YDR024W		YBR213W	YLR121C	YLR121C
								YML104C	YER060W-A	YER060W-A		YMR095C	YER184C	YER184C
								YJR140C	YAL064C-A	YAL064C-A		YBL071W-A	YOL058W	YOL058W
								YFR056C	YER153C	YER153C		YKL185W	YHR173C	YHR173C
								YDR044W	YHR213W	YHR213W		YPL115C	YDR193W	YDR193W
								YLR190W	YNL328C	YNL328C		YHL018W	YBR134W	YBR134W
								YAL064W-B	Q0055	Q0055		YER144C	YPL044C	YPL044C
								YFR022W	YLR437C-A	YLR437C-A		YOR083W	YOR025W	YOR025W
								YHR098C	YLR286C	YLR286C		YER172C	YMR306W	YMR306W
								YDR150W	YIL150C	YIL150C		YLR063W	YAL024C	YAL024C
								YJL225C	YPL102C	YPL102C		YHR032W-A	YBR115C	YBR115C
								YBL066C	YBR115C	YBR115C		YCR067C	YHR131W-A	YHR131W-A
								YLR307C-A	YAL065C	YAL065C		YJR053W	YPL073C	YPL073C
								YJR078W	YLR338W	YLR338W		YBR294W	YDR488C	YDR488C
								YBR223C	YLR377C	YLR377C		YML037C	YNL210W	YNL210W
								YNL321W	Q0275	Q0275		YIR023W	Q0065	Q0065
								YOR073W	YCL026C-B	YCL026C-B		YPR106W	YGR014W	YGR014W
								YEL049W	YHR099W	YHR099W		YAR042W	YHR099W	YHR099W
								YDR261C	YBR158W	YBR158W		YMR163C	YKR054C	YKR054C
								YNL019C	YLR347W-A	YLR347W-A		YGR294W	YLR236C	YLR236C
								YPL158C	YDL085W	YDL085W		YLR255C	YGR032W	YGR032W
								YLR378C	YHR182C-A	YHR182C-A		YMR198W	YBR117C	YBR117C
								YNL310C	YNL300W	YNL300W		YHL016C	YER091C	YER091C
								YHL026C	YMR069W	YMR069W		YLR428C	YKR041W	YKR041W
								YLR212C	YLR385C	YLR385C		YLR092W	YLR084C	YLR084C
								YNL273W	YIL131C	YIL131C		YGR087C	YOL141W	YOL141W
								YOR107W	YJR095W	YJR095W		YER068W	YEL053W-A	YEL053W-A
								YIL171W-A	Q0085	Q0085		YDL141W	YNR067C	YNR067C
								YJL220W	YMR063W	YMR063W		YMR084W	YJR128W	YJR128W
								YOR392W	YHR172W	YHR172W		YOR156C	YNL278W	YNL278W
								YDL003W	YBR117C	YBR117C		YLR132C	YDL210W	YDL210W
								YNL172W	YML109W	YML109W		YDR402C	YPL102C	YPL102C
								YCL037C	YJR128W	YJR128W		YKL178C	YJL158C	YJL158C
								YGR224W	YML133C	YML133C		YIL117C	YER070W	YER070W
								YOR345C	YKR097W	YKR097W		YNL262W	Q0255	Q0255
								YKL217W	YLR236C	YLR236C		YJR106W	YLR338W	YLR338W
								YPL082C	Q0060	Q0060		YJL084C	YOR381W-A	YOR381W-A
								YER132C	YBL013W	YBL013W		YGL175C	Q0250	Q0250
								YER032W	YER152W-A	YER152W-A		YEL061C	YGL028C	YGL028C
								YBR301W	YGR022C	YGR022C		Q0120	YDR455C	YDR455C
								YDR501W	YJL019W	YJL019W		YGL197W	YOR301W	YOR301W
								YOR188W	YOR316C-A	YOR316C-A		YNL277W	YMR063W	YMR063W
								YKL070W	YOR301W	YOR301W		YIL046W	YAR035W	YAR035W
								YDR359C	YER079C-A	YER079C-A		YDR314C	YPL256C	YPL256C
								YNL242W	YDR360W	YDR360W		YBR296C	YNL328C	YNL328C
								YOR140W	YDL032W	YDL032W		YGL240W	YHR093W	YHR093W
								YPL164C	YIL123W	YIL123W		YBR295W	YIL123W	YIL123W
								YJL042W	YPL223C	YPL223C		YER039C	YJR146W	YJR146W
								YBR294W	YIL176C	YIL176C		YDR095C	YLR347W-A	YLR347W-A
								YGR217W	YJL223C	YJL223C		YDR457W	Q0045	Q0045
								YOR024W	YNL332W	YNL332W		YHR094C	YCR063W	YCR063W
								YLR415C	YDR488C	YDR488C		YEL017W	YOL019W	YOL019W
								YIR034C	YOR378W	YOR378W		YOL155C	YLR142W	YLR142W
								YBR108W	YAL024C	YAL024C		YOR306C	YEL059W	YEL059W
								YDL170W	YDR344C	YDR344C		YER033C	YIL141W	YIL141W
								YDR314C	YNL028W	YNL028W		YOR077W	YER060W-A	YER060W-A
								YKL038W	YAR035W	YAR035W		YER105C	YOR329W-A	YOR329W-A
								YLL038C	YPL256C	YPL256C		YAL021C	YLR157W-D	YLR157W-D
								YPR164W	YER165C-A	YER165C-A		YLR416C	Q0060	Q0060
								YFR034C	YGL218W	YGL218W		YLR213C	YEL035C	YEL035C
								YPR202W	YHR093W	YHR093W		YGR217W	YBR182C	YBR182C
								YGL074C	YNL066W	YNL066W		YNL139C	YBL013W	YBL013W
								YDR009W	YGR242W	YGR242W		YLR047C	YLR438W	YLR438W
								YPR115W	YLR234W	YLR234W		YOL085C	YLR234W	YLR234W
								YLR121C	YMR305C	YMR305C		YIL173W	YOR055W	YOR055W
								YKL107W	YPL073C	YPL073C		YER086W	YDL032W	YDL032W
								YOL058W	YLR402W	YLR402W		YER119C-A	YER153C	YER153C
								YBR124W	YNL120C	YNL120C		YEL046C	YDR360W	YDR360W
								YPR035W	YIL141W	YIL141W		YCR093W	YOR139C	YOR139C
								YHL046C	YPR076W	YPR076W		YER166W	YIR040C	YIR040C
								YNL139C	YHR125W	YHR125W		YBR224W	YMR244W	YMR244W
								YPL103C	YNL296W	YNL296W		YER019W	YGL218W	YGL218W
								YGL205W	YPL036W	YPL036W		YBR072W	YER152W-A	YER152W-A
								YGR189C	YOR055W	YOR055W		YAL053W	YLR437C-A	YLR437C-A
								YBR213W	YGL028C	YGL028C		YOR153W	YBR208C	YBR208C
								YIL146C	YDR149C	YDR149C		YJL095W	YDL034W	YDL034W
								YER069W	YPR123C	YPR123C		YAR068W	YCL026C-A	YCL026C-A
								YBR109W-A	YFL064C	YFL064C		YKL038W	Q0055	Q0055
								YDR270W	YDR269C	YDR269C		YJR129C	YOR378W	YOR378W
								YGR108W	YNL327W	YNL327W		YNL095C	YER172C-A	YER172C-A
								YGL146C	YIR040C	YIR040C		YBL070C	Q0105	Q0105
								YBL009W	YHR126C	YHR126C		YPR032W	YIR017W-A	YIR017W-A
								YLL059C	YNL033W	YNL033W		YFR034C	YNL120C	YNL120C
								YMR031W-A	YOL007C	YOL007C		Q0070	YGR242W	YGR242W
								YIL162W	YMR189W	YMR189W		YJL092W	YNL327W	YNL327W
								YBL074C	YGL261C	YGL261C		YKL029C	YMR069W	YMR069W
								YDR443C	YNR067C	YNR067C		YDR507C	YER079C-A	YER079C-A
								YFR019W	YGL235W	YGL235W		YOR050C	YNL066W	YNL066W
								YHR178W	YGR270C-A	YGR270C-A		YAR047C	YDR149C	YDR149C
								YOR290C	YIL134C-A	YIL134C-A		YML027W	YHR182C-A	YHR182C-A
								YOR050C	YDR526C	YDR526C		YNR005C	YPR077C	YPR077C
								YNR072W	YER124C	YER124C		YDL138W	YNL028W	YNL028W
								YIL129C	YER068C-A	YER068C-A		YBR065C	YKR033C	YKR033C
								YML037C	YLR235C	YLR235C		YNR009W	YDR344C	YDR344C
								YFL021C-A	YER190W	YER190W		YPR145W	YCL026C-B	YCL026C-B
								YLR467W	YEL076C	YEL076C		YFL021C-A	YMR305C	YMR305C
								YDR545W	YDR053W	YDR053W		YOR381W	YFL067W	YFL067W
								YOR396W	YLR465C	YLR465C		YGL064C	YGR022C	YGR022C
								YOR192C	YLR462W	YLR462W		YLL059C	YMR189W	YMR189W
								YGL239C	YFL067W	YFL067W		YNL282W	YOL007C	YOL007C
								YPR119W	YIR017W-A	YIR017W-A		YMR199W	Q0085	Q0085
								YPL115C	YGL217C	YGL217C		YNR066C	YER165C-A	YER165C-A
								YMR094W	YOL046C	YOL046C		YJL052W	YLR402W	YLR402W
								YNL329C	YJR150C	YJR150C		YOR247W	Q0275	Q0275
								YDL141W	YHR056W-A	YHR056W-A		YNR056C	YDR053W	YDR053W
								YGR061C	YHR218W	YHR218W		YOR129C	YDR269C	YDR269C
								YLR245C	YJL195C	YJL195C		YLR286C	YPR076W	YPR076W
								YKR045C	YDR545C-A	YDR545C-A		YLL025W	YDR526C	YDR526C
								YNR066C	YHL049C	YHL049C		YHR214W-A	YNL296W	YNL296W
								YBL065W	YHR165W-A	YHR165W-A		YEL067C	YHR125W	YHR125W
								YDR038C	YAL004W	YAL004W		YGL125W	YLR235C	YLR235C
								YLR063W	YOR325W	YOR325W		YDL220C	YER124C	YER124C
								YAL021C	YJL175W	YJL175W		YMR144W	YGR270C-A	YGR270C-A
								YDR457W	YEL075W-A	YEL075W-A		YJL172W	YNL033W	YNL033W
								YEL075C	YNL339C	YNL339C		YNL014W	YGL235W	YGL235W
								YDR538W	YCR045W-A			YLL024C	YPR123C	YPR123C
								YGL064C	YLR154W-C			YLL040C	YLR465C	YLR465C
								YGR290W	YKL006C-A			YPL027W	YER068C-A	YER068C-A
								YGR140W	YCL001W			YLR245C	YEL076C	YEL076C
								YBL070C	YLR175W			YMR031W-A	YHL050W-A	YHL050W-A
								YJL121C	YKL021C			YNL289W	YLR462W	YLR462W
								YLR255C	YPR107C			YLR190W	YJR150C	YJR150C
								YOR077W	YKL123W			YBR240C	YER190W	YER190W
								YKL163W	YPL065W			YNL240C	YGL217C	YGL217C
								YOL156W	YMR141C			YGL131C	YHR126C	YHR126C
								YLR092W	YGL069C			YJR078W	YHR056W-A	YHR056W-A
								YPR032W	YOR103C			YEL030W	YHR218W	YHR218W
								YPL040C	YKR068C			YFL064C	YJL195C	YJL195C
								YLR187W	YMR052C-A			YBL073W	YOL046C	YOL046C
								YEL069C	YDR494W			YPR202W	YAL004W	YAL004W
								YHR214W-A	YGL123C-A			YER149C	YHR165W-A	YHR165W-A
								YPR192W	YNL211C			YPR009W	YJL175W	YJL175W
								YDR536W	YDL160C-A			YKR097W	YOR325W	YOR325W
								YOR083W	YBR211C			YLR023C	YHL049C	YHL049C
								YNL282W	YFL046W			YDR309C	YEL075W-A	YEL075W-A
								YKR041W	YHR063W-A			YER032W	YNL339C	YNL339C
								YCL063W	YOR366W			YNR075W	YIL177W-A
								YGL197W	YLR062C			YFR021W	YJL225W-A
								YJL219W	YMR173W			YDR213W	YMR158C-A
								YOL081W	YER146W			YPL155C	YIR005W
								YEL035C	YOR096W			YJL153C	YPL071C
								YLL051C	YIL027C			YOR107W	YHR180W-A
								YGL131C	YJR157W			Q0075	YIL115W-A
								YGL216W	YNL081C			YMR279C	YOR258W
								YNL095C	YJR100C			YDL229W	YMR151W
								YHR096C	YPR169W-A			YDL240W	YIL136W
								YBR162C	YBR183W			YMR190C	YKL021C
								YEL019C	YMR173W-A			YNR062C	YJL190C
								YDL182W	YJL048C			YIL140W	YPL196W
								YEL030W	YDL099W			YNR063W	YJL104W
								YER078W-A	YHR043C			YOL081W	YGL102C
								YPL155C	YJR050W			YLR045C	YCR102C
								YPL027W	YMR175W-A			YLR393W	YGR035W-A
								YML042W	YCR060W			YER044C-A	YMR286W
								YNL034W	YOR115C			YOR371C	YHR010W
								YAR042W	YOL139C			YIR018W	YKL065C
								YBR065C	YIL161W			YFR022W	YCL067C
								Q0120	YLR333C			YNL283C	YCR039C
								YNL106C	YBR181C			YGR144W	YPL143W
								YLL025W	YDL002C			YIL160C	YPR103W
								YHR214W	YKR057W			YNL105W	YEL003W
								YER060W	YML063W			YEL066W	YGR253C
								YER065C	YPL096W			YOL156W	YLR287C-A
								YMR096W	YOR143C			YLR187W	YLR166C
								YCR093W	YHR088W			YCR049C	YGR042W
								YAR019W-A	YPR099C			YPL221W	YDR308C
								YPR116W	YGR280C			YEL032W	YOR276W
								YCR068W	YGR232W			YDL238C	YHL015W
								YHR032W-A	YOR253W			YBL065W	YOL014W
								YKL185W	YLR441C			YDL170W	YMR188C
								YKL127W	YCR102C			YPL127C	YIL040W
								YCR006C	YIL030W-A			YMR057C	YDR469W
								YDL242W	YNL235C			YPL162C	YNL136W
								YCR067C	YGR074W			YKL163W	YPL099C
								YLR313C	YIL020C-A			YLL056C	YLR444C
								YHR069C-A	YBR052C			YPL258C	YGL230C
								YMR163C	YLR080W			YLR112W	YAR069C
								YAR020C	YBR255C-A			YOR384W	YHR214C-D
								YJL214W	YFL028C			YDR355C	YAR027W
								YOR035C	YCL033C			YBR136W	YGL226W
								YOR026W	YBR262C			YER003C	YIL071W-A
								YLR086W	YOR327C			YLR357W	YBR211C
								YOR388C	YDR056C			YEL063C	YLL042C
								YDR451C	YBR111C			YBR038W	YOR121C
								YFR054C	YBR278W			YLR058C	YDR399W
								YOR011W	YDR383C			YGR177C	YOL086W-A
								YJR154W	YDR087C			YER028C	YOL096C
								YHL040C	YLR009W			YDR270W	YMR075C-A
								YMR198W	YBR200W-A			YEL049W	YBR090C
								YDL127W	YDR316W			YNL269W	YDL191W
								YKL197C	YLL014W			YJL107C	YCR024C-B
								Q0075	YOR020C			YER017C	YIL065C
								YEL009C-A	YMR112C			YKL031W	YBR255C-A
								YDR213W	YDR413C			YJL187C	YML024W
								YLL024C	YBR282W			YER061C	YLR251W
								YMR120C	YER067W			YJR092W	YLR298C
								YDL238C	YPR044C			YPR096C	YAR053W
								YCR048W	YPL273W			YPR116W	YMR143W
								YGR203W	YCR095C			YCR068W	YIL019W
								YGL045W	YJR058C			YLL018C-A	YBR278W
								YPL258C	YNR020C			YPR153W	YGR286C
								YKL101W	YDR308C			YDL151C	YNL084C
								YLL018C-A	YMR188C			YKR045C	YDL075W
								YOL011W	YOL149W			YHR102W	YKR081C
								YHR212W-A	YDR377W			YJL121C	YBL049W
								YPL016W	YGL147C			YOR011W	YKL099C
								YPR106W	YJR085C			YGR203W	YGR132C
								YJL135W	YBR242W			YNL270C	YDR078C
								YBR070C	YGR132C			YNL279W	YLR311C
								YNR063W	YBR217W			YNL018C	YOR262W
								YBL073W	YIL156W-B			YDR093W	YKL001C
								YPL162C	YOR044W			YER089C	YDR272W
								YDL223C	YPR103W			YER060W	YGL050W
								YGL063W	YKR011C			YPL141C	YNL151C
								YLR037C	YBL059C-A			YLR180W	YDR070C
								YBR224W	YGR103W			YGR189C	YJL173C
								YIL173W	YDR473C			YJL078C	YKL123W
								YEL053W-A	YPR108W			YNL187W	YDL027C
								YKL031W	YHR184W			YML109W	YPR107C
								YOR129C	YBR226C			YCR048W	YPR051W
								YCL026C-A	YGR027C			YDR437W	YLR295C
								YNL279W	YKR081C			YDR146C	YAL045C
								YIL155C	YOR279C			YLR379W	YGL123C-A
								YOR371C	YBR256C			YBR113W	YDR152W
								YBR072W	YOL101C			YIL029W-A	YDR377W
								YJR092W	YHR143W-A			YLR123C	YKL013C
								YOR247W	YPL220W			YEL009C-A	YPL108W
								YNL203C	YDR429C			YGL239C	YGL161C
								YHR102W	YLR022C			YIL150C	YDR236C
								YDR402C	YER137C			YFR029W	YLR170C
								YFR021W	YLR254C			YGR108W	YFR033C
								YML027W	YJL096W			YER069W	YGR103W
								Q0045	YPR028W			YJL108C	YLR009W
								YIL006W	YBR120C			YPR119W	YGL005C
								YNR069C	YPL186C			YJL076W	YCR014C
								Q0070	YDR115W			YOR035C	YKL006C-A
								YDR014W-A	YFL013W-A			YBR156C	YJL199C
								Q0050	YDR086C			YPL085W	YMR112C
								YDR437W	YLR104W			YOR328W	YIL016W
								Q0250	YOL032W			YGL063W	YNR061C
								YNL018C	YCR096C			YAR066W	YOR143C
								YLR357W	YGR275W			YOR316C-A	YNL024C-A
								YAR068W	YML098W			YHR213W	YGL243W
								YNR073C	YFR008W			YGL045W	YDR162C
								YBR180W	YLL050C			YOR373W	YBR128C
								YPL127C	YKR040C			YLR415C	YHR012W
								YOR156C	YHR052W			YOR263C	YMR172C-A
								YLR353W	YDR515W			YDR055W	YOR189W
								YJL095W	YBR230W-A			YMR303C	YOL166C
								YNL078W	YCL059C			YGL126W	YML094W
								YIR023W	YGL244W			YDR451C	YLR007W
								YIR018W	YGR253C			YPR035W	YDR087C
								YGR041W	YLR438C-A			YOL011W	YNL211C
								YLR047C	YHR196W			YDR009W	YPL010W
								YJR160C	YPL035C			YHL046W-A	YKL114C
								YDL033C	YCR009C			YHR172W	YKR011C
								YDR093W	YAL033W			YAL064C-A	YDR005C
								YAR050W	YEL020W-A			YEL069C	YBR200W-A
								YIL013C	YLR261C			YIL066W-A	YNL015W
								YJL158C	YGR037C			YPL111W	YPL142C
								YNL210W	YEL051W			YDR038C	YBR242W
								YOR384W	YIL139C			YAL065C	YKL058W
								YLR142W	YJR010C-A			YLR087C	YDL212W
								YJL045W	YBR230C			YJL083W	YHR088W
								YGR109C	YGL109W			YLL051C	YBR183W
								YCR049C	YNL084C			YDR537C	YOR044W
								YPR001W	YMR040W			YCR006C	YOL038W
								YLR379W	YGR101W			YBR019C	YBR147W
								YAL066W	YER088C-A			YHL040C	YOL109W
								YMR095C	YLR036C			YDL033C	YNL164C
								YLR123C	YOR189W			YJL127C	YHR196W
								YIR021W-A	YNL109W			YCL014W	YDR248C
								YIL047C	YCL031C			YDR024W	YMR244C-A
								YKL029C	YCR087W			Q0050	YDL166C
								YNL187W	YOL127W			YIL131C	YNL013C
								YKL178C	YDL125C			YEL019C	YDR318W
								YHR094C	YGR187C			YHR214W	YDR450W
								YHR173C	YLR295C			YBR190W	YOR293C-A
								YNL102W	YGR018C			YIL047C	YMR114C
								YBR019C	YGR057C			YPL223C	YDR179C
								YLR393W	YJL152W			YHR139C	YLR257W
								YDL240W	YJL030W			YJL118W	YDR327W
								YPR096C	YDR469W			YHR069C-A	YNL032W
								YJL108C	YLR171W			YPL058C	YDR086C
								YCR106W	YAL008W			YBR158W	YBR256C
								YJR053W	YGR235C			YJL019W	YDR071C
								YJL083W	YLR166C			YKR013W	YCL048W-A
								YGR204W	YMR194W			YGR204W	YGR018C
								YFL065C	YER072W			YER132C	YPR158W
								YMR199W	YJL015C			YNL019C	YPL107W
								YPL085W	YLR007W			YLR385C	YDR056C
								YDR455C	YMR195W			YEL008W	YKL068W-A
								YNL262W	YNL107W			YML133C	YFL028C
								YLR428C	YGR240C-A			YOR348C	YGL231C
								YNL333W	YDR272W			YIL066C	YCR060W
								YOR381W-A	YNR022C			YHR173C	YLR218C
								YJL076W	YER102W			YCR106W	YBR257W
								YBR208C	YHR130C			YMR032W	YCL059C
								YNL283C	YLL042C			YPL073C	YMR270C
								YAR047C	YJL136C			YLR121C	YDR447C
								YPL141C	YIL127C			YBR134W	YJR086W
								YJL092W	YGL226C-A			YDR193W	YLR041W
								YBR136W	YGL168W			YBR115C	YDL078C
								YNL117W	YKL040C			YOL058W	YDR315C
								YLR183C	YMR090W			YER184C	YKL011C
								YHR131W-A	YMR244C-A			YNL300W	YDR114C
								YLR084C	YGR215W			YPL044C	YPL238C
								YLR213C	YER058W			YMR306W	YDR280W
								YNL269W	YPL238C			YAL024C	YBR230C
								YFR029W	YDR280W			YHR131W-A	YPR109W
								YNR009W	YDL027C			YDR488C	YCL031C
								YGL175C	YDR519W			Q0065	YPL002C
								YLR438W	YIL086C			YLR236C	YKR068C
								YMR306W	YEL044W			YNL210W	YBR262C
								YLR058C	YBR090C			YGR014W	YNL107W
								YJL107C	YNL024C			YOR025W	YLR306W
								YMR303C	YJR073C			YHR099W	YNL177C
								YDL156W	YOL038W			YKR054C	YOR103C
								YAL059C-A	YKL117W			YBR117C	YNR035C
								YJL118W	YDL219W			YGR032W	YGL041C-B
								YMR279C	YAR003W			YPL102C	YNR074C
								YNL289W	YNR035C			YER091C	YDL135C
								YCL023C	YGR131W			YLR084C	YLR441C
								YNR062C	YOR232W			YEL053W-A	YGR230W
								YDR193W	YMR239C			YJR128W	YBR282W
								YLL040C	YOR262W			YDR455C	YLR022C
								YPL222W	YDR450W			YNL278W	YCR090C
								YAR066W	YHR012W			YLR338W	YGL147C
								YGR032W	YCR001W			YNR067C	YGL250W
								YOR263C	YOR362C			YER070W	YJL096W
								YJL187C	YLR146C			YOR381W-A	YDL069C
								YIL140W	YPL108W			YKR041W	YMR230W
								YKR013W	YPL197C			Q0255	YMR119W-A
								YNL014W	YNL222W			YJL158C	YBR052C
								YMR190C	YLR257W			YOL141W	YBR120C
								YJL127C	YPL034W			Q0250	YOR238W
								YMR144W	YDR152W			YDL210W	YKL040C
								YPL044C	YJR123W			YMR063W	YML063W
								YOL141W	YPL196W			YGL028C	YLR309C
								YDR537C	YGL005C			YOR301W	YOR232W
								YLR157W-D	YGL247W			YAR035W	YBR024W
								YER070W	YMR151W			YNL328C	YBR137W
								YIR020W-A	YLR344W			YJR146W	YKL151C
								YCL014W	YHR193C			YLR347W-A	YMR090W
								Q0255	YMR074C			YEL059W	YPL211W
								YJL078C	YJL024C			Q0045	YPL273W
								YDR507C	YHR065C			YIL123W	YDL107W
								YBR134W	YDR370C			YPL256C	YPR165W
								YDL220C	YPL052W			YCR063W	YJR011C
								YAL054C	YMR158W			YLR157W-D	YDR540C
								YCR010C	YNR074C			YOL019W	YIL148W
								YBR113W	YBR022W			YER060W-A	YIL068W-A
								YIL066W-A	YOR332W			YLR142W	YDR278C
								YLR045C	YPR166C			YIL141W	YGR276C
								YGR067C	YNL044W			YDL032W	YMR014W
								YLR463C	YHR087W			YOR055W	YHL034W-A
								YBR190W	YLR025W			YBL013W	YLR012C
								YDR355C	YPL001W			YEL035C	YLR093C
								YGR014W	YFR036W-A			Q0060	YMR158W
								YIL029W-A	YGL226W			YBR182C	YDR285W
								YOR348C	YGR276C			YLR438W	YHR065C
								YEL059W	YDR071C			YLR234W	YGR101W
								Q0065	YNL164C			YDR360W	YOR362C
								YIL066C	YMR230W-A			YER153C	YML108W
								YOR139C	YOL099C			YIR040C	YHR063W-A
								YDL034W	YEL017C-A			YDL034W	YKL007W
								YOR328W	YPL037C			YGL218W	YKR094C
								YOR373W	YOR123C			YLR437C-A	YKL049C
								YNL278W	YGL161C			YER152W-A	YDR305C
								YER172C-A	YMR022W			YCL026C-A
								YJR146W	YJL161W			YOR139C
								YLR087C	YMR271C			YER172C-A
								YOR025W	YGL243W			YNL120C
								YLR331C	YJL199C			YOR378W
								YIL160C	YIL029C			YBR208C
								Q0105	YCL048W-A			YGR242W
								YDR024W	YKL114C			Q0055
								YBR156C	YER092W			Q0105
								YNL270C	YPL038W			YMR069W
								YAL065C	YBR137W			YMR244W
								YOL019W	YNL002C			YEL075C
								YCR063W	YGR030C			YHR182C-A
								YAL064C-A	YAR030C			YNL067W-B
								YDL151C	YLR243W			YNL327W
								YBR182C	YJR088C			YER079C-A
								YER060W-A	YOR249C			YNL028W
								YKR054C	YNL200C			YNL066W
								YPL102C	YGL054C			YPR077C
								YCL026C-B	YER038C			YDR149C
								YNL328C	YGL204C			YKR033C
								YER153C	YDR114C			YCL026C-B
								YLR437C-A	YCL042W			YDR344C
								YBR115C	YGL042C			YMR305C
								YIL150C	YNL100W			YMR189W
								YLR338W	YGL050W			YOL007C
								YHR182C-A	YGL070C			Q0085
								Q0055	YER048W-A			YER165C-A
								YHR213W	YNL001W			YLR402W
								YLR286C	YOL048C			YER023C-A
								YBL008W-A	YMR304C-A			Q0275
								Q0275	YNL010W			YDR269C
								YLR347W-A	YJL023C			YDR526C
								YLR377C				YMR082C
								YHR099W				YGL261C
								YBR158W				YNL296W
								YML133C				YJL047C-A
								YLR385C				YER085C
								YDL085W				YLR235C
								YMR069W				YBR182C-A
								YMR063W				YDR464C-A
								YJR128W				YIL134C-A
								YIL131C				YER124C
								Q0085				YNL033W
								YBR117C				YPR123C
								YHR172W				YGL235W
								YJR095W				YLR465C
								YLR236C				YDR169C-A
								YNL300W				YER068C-A
								YML109W				YHR093W
								YKR097W				YEL076C
								YBL013W				YOR329W-A
								Q0060				YDR542W
								YER152W-A				YJR150C
								YOR316C-A				YER190W
								YJL019W				YIR017W-A
								YDL032W				YHR126C
								YER079C-A				YGR022C
								YDR360W				YFL067W
								YOR301W				YDR053W
								YNL332W				YHR218W
								YIL176C				YPR076W
								YJL223C				YJL195C
								YPL223C				YHR125W
								YNL028W				YOL046C
								YIL123W				YGR270C-A
								YDR488C				YHL050W-A
								YOR378W				YLR462W
								YDR344C				YGL217C
								YAL024C				YHR056W-A
								YAR035W				YAL004W
								YER165C-A				YHR165W-A
								YGL218W				YJL175W
								YGR242W				YOR325W
								YPL073C				YHL049C
								YLR402W				YLL067C
								YNL066W				YEL075W-A
								YPL256C				YNL339C
								YLR234W
								YMR305C
								YNL120C
								YNL296W
								YIL141W
								YOR055W
								YPL036W
								YFL064C
								YPR123C
								YGL028C
								YDR149C
								YDR269C
								YHR126C
								YIR040C
								YNL327W
								YNL033W
								YDR542W
								YMR189W
								YOL007C
								YLL030C
								YGL235W
								YDR169C-A
								YNR067C
								YBR298C-A
								YDR526C
								YER124C
								YER068C-A
								YCR104W
								YER190W
								YIL021C-A
								YER085C
								YLR235C
								YBR182C-A
								YOR329W-A
								YER091C-A
								YEL076C
								YLR465C
								YGR022C
								YER023C-A
								YDR464C-A
								YHR093W
								YPR076W
								YHR125W
								YOL046C
								YJR150C
								YHR218W
								YGL261C
								YJL195C
								YIL134C-A
								YGR270C-A
								YHL050W-A
								YDR053W
								YLR462W
								YFL067W
								YIR017W-A
								YGL217C
								YLL067C
								YHR056W-A
								YDR545C-A
								YHL049C
								YHR165W-A
								YAL004W
								YOR325W
								YJL175W
								YEL075W-A
								YNL339C

## Sheet: 50fL
wt.vs.rpl22a				wt.vs.rpl22b				wt.vs.rpl34a				wt.vs.rpl34b				rpl22a.vs.rpl22b				rpl22a.vs.rpl34a				rpl22a.vs.rpl34b				rpl22b.vs.rpl34a				rpl22b.vs.rpl34b				rpl34a.vs.rpl34b
babel	DESeq2	intersection		babel	DESeq2	intersection		babel	DESeq2	intersection		babel	DESeq2	intersection		babel	DESeq2	intersection		babel	DESeq2	intersection		babel	DESeq2	intersection		babel	DESeq2	intersection		babel	DESeq2	intersection		babel	DESeq2	intersection
YLR062C	YDR545C-A	YLR062C		YFL034C-A	YFL034C-A	YFL034C-A		YOL050C	YOL050C	YOL050C		YLR466C-A	YLR466C-A	YLR466C-A		YFL034C-A	YFL034C-A	YFL034C-A		YLR464W	YLR154C-H	YLR154C-H		YLR466C-A	YLR466C-A	YLR466C-A		YIL177C	YER056C-A	YER056C-A		YIL177C	YIL177C	YIL177C		YFL065C	YLR466C-A	YLR466C-A
YLR061W	YLR062C	YLR061W		YBL112C	YBL112C	YBL112C		YER056C-A	YGL188C	YER056C-A		YLR467C-A	YLR467C-A	YLR467C-A		YLR464W	YEL075W-A	YEL075W-A		YEL076C-A	YLR156C-A	YLR156C-A		YOR396C-A	YLR467C-A	YLR467C-A		YLR159C-A	YBR058C-A	YBR058C-A		YLR466C-A	YLR466C-A	YLR466C-A		YLR466C-A	YLR467C-A	YLR467C-A
YML009W-B	YLR061W	YML009W-B		YHR218W-A	YHR218W-A	YHR218W-A		YGL188C	YER056C-A	YGL188C		YOR396C-A	YOR396C-A	YOR396C-A		YEL076C-A	YNL093W	YNL093W		YEL032C-A	YLR157C-C	YLR157C-C		YLR467C-A	YOR396C-A	YOR396C-A		YLR157C-C	YOR265W	YOR265W		YLR467C-A	YLR467C-A	YLR467C-A		YLR467C-A	YOR396C-A	YOR396C-A
YDR545C-A	YML009W-B	YDR545C-A		YOR108C-A	YOR108C-A	YOR108C-A		YKL083W	YKL083W	YKL083W		YKL083W	YKL083W	YKL083W		YEL075W-A	YMR120C	YMR120C		YLR154C-H	YLR159C-A	YLR159C-A		YLL066W-B	YLL066W-B	YLL066W-B		YLR154C-H	YDR281C	YDR281C		YOR396C-A	YOR396C-A	YOR396C-A		YOR396C-A	YIL052C	YIL052C
YDL247W	YDL247W	YDL247W		YJR079W	YJR079W	YJR079W		YKL202W	YKL202W	YKL202W		YKL202W	YGL188C	YGL188C		YNL093W	YJR005C-A	YJR005C-A		YLR156C-A	YEL032C-A	YEL032C-A		YEL032C-A	YLR154C-H	YLR154C-H		YLR156C-A	YGR008C	YGR008C		YNL017C	YNL017C	YNL017C		YIL052C	YAL059C-A	YAL059C-A
YEL050W-A	YEL050W-A	YEL050W-A		YIL105W-A	YIL105W-A	YIL105W-A		YPL114W	YPL114W	YPL114W		YGL188C	YKL202W	YKL202W		YMR120C	YLR377C	YLR377C		YLR157C-C	YER056C-A	YER056C-A		YLR156C-A	YLR156C-A	YLR156C-A		YNL017C	YDR500C	YDR500C		YLR157C-C	YLR154C-H	YLR154C-H		YCL068C	YJR005C-A	YJR005C-A
YBL112C	YBL112C	YBL112C		YER014C-A	YOR169C	YOR169C		YMR307C-A	YMR307C-A	YMR307C-A		YIL052C	YIL052C	YIL052C		YNL017C	YGR164W	YGR164W		YLR159C-A	YBL068W-A	YBL068W-A		YLR159C-A	YLR157C-C	YLR157C-C		YER190C-B	YLR154C-H	YLR154C-H		YLR154C-H	YLR156C-A	YLR156C-A		YGL260W	YHR219W	YHR219W
YHR218W-A	YHR218W-A	YHR218W-A		YLR222C-A	YER014C-A	YER014C-A		YBL068W-A	YCL065W	YBL068W-A		YHR219W	YHR219W	YHR219W		YJR005C-A	YPL223C	YPL223C		YER056C-A	YNL017C	YNL017C		YLR157C-C	YLR159C-A	YLR159C-A		YGR296C-B	YLR156C-A	YLR156C-A		YLR156C-A	YLR157C-C	YLR157C-C		YAL059C-A	YGR236C	YGR236C
YOR108C-A	YOR108C-A	YOR108C-A		YBR099C	YLR222C-A	YLR222C-A		YCL065W	YLR154C-H	YCL065W		YMR269W	YMR269W	YMR269W		YOL013W-A	YHR139C	YHR139C		YJR158W	YMR307C-A	YMR307C-A		YLR154C-H	YEL032C-A	YEL032C-A		YPL283W-B	YLR157C-C	YLR157C-C		YLR159C-A	YLR159C-A	YLR159C-A		YJR140W-A	YGR115C	YGR115C
YIL105W-A	YHR054C	YIL105W-A		YOR169C	YCL048W-A	YCL048W-A		YBR058C-A	YLR156C-A	YBR058C-A		YGR169C-A	YLL066W-B	YLL066W-B		YLR377C	YNL285W	YNL285W		YBL068W-A	YDR278C	YDR278C		YJR158W	YIL052C	YIL052C		YPR204C-A	YLR159C-A	YLR159C-A		YER190C-B	YEL032C-A	YEL032C-A		YJR005C-A	YBL109W	YBL109W
YHR054C	YIL105W-A	YHR054C		YDR442W	YDR442W	YDR442W		YGR008C	YLR157C-C	YGR008C		YHR217C	YHR217C	YHR217C		YGR164W	YHR054C	YHR054C		YNL017C	YLL066W-B	YLL066W-B		YIL052C	YBR266C	YBR266C		YEL032C-A	YDR067C	YDR067C		YPR204C-A	YDR278C	YDR278C		YJR162C	YHR217C	YHR217C
YER014C-A	YOR169C	YER014C-A		YCL048W-A	YHR130C	YHR130C		YLR156C-A	YLR159C-A	YLR156C-A		YOL050C	YGR169C-A	YGR169C-A		YPL223C	YDL247W	YDL247W		YDR015C	YGL041C	YGL041C		YBR266C	YKL202W	YKL202W		YER056C-A	YBL001C	YBL001C		YPL283W-B	YIL052C	YIL052C		YLL067W-A	YJR095W	YJR095W
YOR169C	YLR264C-A	YOR169C		YOR186C-A	YIL014C-A	YIL014C-A		YLR154C-H	YBR058C-A	YLR154C-H		YJR162C	YJR162C	YJR162C		YHR139C	YLR062C	YLR062C		YMR307C-A	YKL202W	YKL202W		YKL202W	YNL338W	YNL338W		YDR278C	YER030W	YER030W		YGR296C-B	YLL066W-B	YLL066W-B		YLL066W-A	YKL083W	YKL083W
YLR264C-A	YJL156W-A	YLR264C-A		YKL223W	YOR186C-A	YOR186C-A		YLR159C-A	YBL068W-A	YLR159C-A		YLL066W-B	YMR307C-A	YMR307C-A		YNL285W	YLR061W	YLR061W		YDR278C	YFL015C	YFL015C		YNL017C	YNL017C	YNL017C		YHR219C-A	YDR022C	YDR022C		YFL065C	YLR154W-E	YLR154W-E		YFL068W	YNL013C	YNL013C
YNR077C	YER014C-A	YNR077C		YNL319W	YNL319W	YNL319W		YLR157C-C	YGR008C	YLR157C-C		YMR307C-A	YLR154C-H	YLR154C-H		YHR054C	YDR545C-A	YDR545C-A		YGL041C	YNL338W	YNL338W		YDR278C	YHR217C	YHR217C		YML133W-B	YJR023C	YJR023C		YEL032C-A	YBR266C	YBR266C		YOR161W-B	YBL053W	YBL053W
YJL156W-A	YJR079W	YJL156W-A		YAL016C-B	YAL016C-B	YAL016C-B		YHR218W-A	YBL112C	YHR218W-A		YGR008C	YLR156C-A	YLR156C-A		YNL339W-B				YGR296C-B	YBR266C	YBR266C		YHR217C	YDR278C	YDR278C		YNL339W-B	YKL156W	YKL156W		YDR278C	YKL202W	YKL202W		YHR219W	YIL136W	YIL136W
YJR079W	YBL039W-B	YJR079W		YIL014C-A	YJL156W-A	YJL156W-A		YBL112C	YHR218W-A	YBL112C		YLR154C-H	YLR157C-C	YLR157C-C		YML133W-B				YER190C-B	YOR268C	YOR268C		YNL338W	YMR307C-A	YMR307C-A		YOL161C	YLR154W-E	YLR154W-E		YIL052C	YFL015W-A	YFL015W-A		YGR236C	YIL057C	YIL057C
YIL014C-A	YIL014C-A	YIL014C-A		YHR130C	YJL032W	YJL032W		YDR281C	YDR281C	YDR281C		YLR159C-A	YLR159C-A	YLR159C-A		YHR219C-A				YLR466C-B	YDR500C	YDR500C		YDR015C	YGL041C	YGL041C		YLR466C-B	YNL079C	YNL079C		YHR219C-A	YLR466C-B	YLR466C-B		YGR115C	YER188W	YER188W
YBL039W-B	YOL162W	YBL039W-B		YML009W-B	YIL029C	YIL029C		YHR138C	YOL150C	YHR138C		YLR157C-C	YKL225W	YKL225W		YFL065C				YPL283W-B	YLL009C	YLL009C		YMR307C-A	YKL225W	YKL225W		YHR180W-A	YLR167W	YLR167W		YNL339W-B	YHR180W-A	YHR180W-A		YJR095W	YER053C-A	YER053C-A
YAL016C-B	YOR192C-C	YAL016C-B		YOL050C	YJR086W	YJR086W		YEL039C	YHR138C	YEL039C		YLR156C-A	YGR008C	YGR008C		YDR545C-A				YPR204C-A	YHR180W-A	YHR180W-A		YGL041C	YLR154W-E	YLR154W-E		YPL114W	YHR152W	YHR152W		YML133W-B	YJR140W-A	YJR140W-A		YKL083W	YPL187W	YPL187W
YJL119C	YNR077C	YJL119C		YJL032W	YLR262C-A	YLR262C-A		YER067C-A	YJR079W	YER067C-A		YBL053W	YKL096C-B	YKL096C-B		YIL177C				YLL066W-B	YBR058C-A	YBR058C-A		YLR154W-E	YBL053W	YBL053W		YLR154W-E	YJL189W	YJL189W		YLR154W-E	YNL338W	YNL338W		YHR217C	YLR444C	YLR444C
YOL162W	YIL165C	YOL162W		YIL029C	YLR264C-A	YLR264C-A		YOL161C	YEL039C	YOL161C		YGL029W	YBL053W	YBL053W		YDL247W				YOR068C	YLR154W-E	YLR154W-E		YPL283W-B	YFL015C	YFL015C		YNL285W	YLR185W	YLR185W		YBR266C	YHR217C	YHR217C		YBL109W	YGR022C	YGR022C
YOR192C-C	YNL235C	YOR192C-C		YLR262C-A	YGL188C	YGL188C		YMR269W	YER067C-A	YMR269W		YOR053W	YGL029W	YGL029W		YLR062C				YCR047W-A	YAL045C	YAL045C		YPR204C-A	YKL083W	YKL083W		YDR015C	YLL009C	YLL009C		YLL066W-B	YBL053W	YBL053W		YNL013C	YPL114W	YPL114W
YIL165C	YJL015C	YIL165C		YJL156W-A	YFL031C-A	YFL031C-A		YDR322C-A	YOL161C	YDR322C-A		YOR309C	YOR309C	YOR309C		YLR061W				YKL202W	YOR265W	YOR265W		YLR466C-B	YJR140W-A	YJR140W-A		YGL041C	YOL109W	YOL109W		YKL202W	YNL285W	YNL285W		YBL053W	YER056C-A	YER056C-A
YNL235C	YPR020W	YNL235C		YLR264C-A	YEL050W-A	YEL050W-A		YJL189W	YMR269W	YJL189W		YMR326C	YOR053W	YOR053W						YFL015C	YGR008C	YGR008C		YGR296C-B	YER038W-A	YER038W-A		YKL202W	YPR145C-A	YPR145C-A		YLR466C-B	YJR005C-A	YJR005C-A		YIL136W	YLL067C	YLL067C
YOR329W-A	YKL066W	YOR329W-A		YGL188C	YKL083W	YKL083W		YJR079W	YDR322C-A	YJR079W		YLR466C-B	YML047W-A	YML047W-A						YBR266C	YHR217C	YHR217C		YER190C-B	YHR219W	YHR219W		YPR108W-A	YHR039C-A	YHR039C-A		YFL015W-A	YGL041C	YGL041C		YIL057C
YPR020W	YAL016C-B	YPR020W		YJR086W	YNL057W	YNL057W		YGR182C	YJL189W	YGR182C		YLR198C	YLR198C	YLR198C						YNL338W	YFR032C-A	YFR032C-A		YBL053W	YOR265W	YOR265W		YGR164W	YKL122C	YKL122C		YHR180W-A	YKL083W	YKL083W		YIL100W
YKL066W	YBL077W	YKL066W		YKL083W	YEL039C	YEL039C		YER053C-A	YER053C-A	YER053C-A		YKL225W	YNL338W	YNL338W						YOR268C	YLR198C	YLR198C		YOR068C	YAL045C	YAL045C		YFL015W-A	YHR059W	YHR059W		YDR015C	YFL015C	YFL015C		YMR107W
YLR252W	YLR252W	YLR252W		YEL039C	YJL015C	YJL015C		YLR444C	YLR444C	YLR444C		YML047W-A	YFL063W	YFL063W						YDR500C	YNL114C	YNL114C		YCR047W-A	YDR544C	YDR544C		YBR266C	YJR034W	YJR034W		YHR217C	YHR219W	YHR219W		YOR268C
YBL077W	YLR222C-A	YBL077W		YAL037C-B	YDR034W-B	YDR034W-B		YLR198C	YLR198C	YLR198C		YKL096C-B	YDR322C-A	YDR322C-A						YLL009C	YPR108W-A	YPR108W-A		YKL083W	YFL063W	YFL063W		YFL015C	YML053C	YML053C		YBL053W	YBL109W	YBL109W		YER188W
YJL015C	YJL119C	YJL015C		YEL050W-A	YOR170W	YOR170W		YFR032C-A	YGR182C	YFR032C-A		YDR322C-A	YLR068W	YLR068W						YBR058C-A	YLL037W	YLL037W		YFL015C	YGL188C	YGL188C		YGR008C	YFR003C	YFR003C		YJR140W-A	YGL188C	YGL188C		YER053C-A
YJL032W	YJL032W	YJL032W		YJL015C	YDR003W-A	YDR003W-A		YOL150C	YFR032C-A	YOL150C		YBR058C-A	YBR058C-A	YBR058C-A						YHR180W-A	YHR039C-A	YHR039C-A		YKL225W	YOR309C	YOR309C		YOR248W	YLR062C	YLR062C		YNL285W	YGR115C	YGR115C		YPL187W
YCL048W-A	YIR018C-A	YCL048W-A		YDR034W-B	YOR102W	YOR102W		YLR262C-A	YLL020C	YLR262C-A		YDR281C	YNR025C	YNR025C						YLR154W-E	YDL096C	YDL096C		YER038W-A	YIL021C-A	YIL021C-A		YLL009C	YNL266W	YNL266W		YGL041C	YJR162C	YJR162C		YLR444C
YGL188C	YCL048W-A	YGL188C		YFL031C-A	YNL170W	YNL170W		YEL033W	YEL033W	YEL033W		YLR068W	YDR281C	YDR281C						YAL045C	YAR075W	YAR075W		YHR219W	YBL109W	YBL109W		YPR145C-A	YLR200W	YLR200W		YJR005C-A	YLL065W	YLL065W		YGR022C
YLR222C-A	YGL188C	YLR222C-A		YOR102W	YNL259C	YNL259C		YLL020C	YGL029W	YLL020C		YNR025C	YHR081W	YHR081W						YOR265W	YOL014W	YOL014W		YOR265W	YGR115C	YGR115C		YDR500C	YHR136C	YHR136C		YNL338W	YCR108C	YCR108C		YPL114W
YJR067C	YJR086W	YJR067C		YOR170W	YKL066W	YKL066W		YGL029W	YLR262C-A	YGL029W		YHR081W	YER067C-A	YER067C-A						YGR008C	YBR089W	YBR089W		YAL045C	YCR108C	YCR108C		YGR022C	YGR018C	YGR018C		YKL083W	YLL009C	YLL009C		YEL076C-A
YIR018C-A	YPR014C	YIR018C-A		YNL057W	YJR067C	YJR067C		YDR374W-A	YOR277C	YDR374W-A		YER067C-A	YBL112C	YBL112C						YHR217C	YNL266W	YNL266W		YDR544C	YLL009C	YLL009C		YDR281C	YOR182C	YOR182C		YHR219W	YER038W-A	YER038W-A		YLR464W
YJR086W	YOL164W-A	YJR086W		YNL259C	YGR139W	YGR139W		YOR277C	YDR374W-A	YOR277C		YFL063W	YHR218W-A	YHR218W-A						YFR032C-A	YJL026C-A	YJL026C-A		YOR309C	YAL059C-A	YAL059C-A		YFR032C-A	YGR082W	YGR082W		YFL015C	YGR008C	YGR008C		YKL223W
YEL039C	YFL031C-A	YEL039C		YNL170W	YMR269W	YMR269W		YOR234C	YOR234C	YOR234C		YHR138C	YHR138C	YHR138C						YLR198C	YGL061C	YGL061C		YGR115C	YGR228W	YGR228W		YDL096C	YDL069C	YDL069C		YBL109W	YGR164W	YGR164W		YER056C-A
YNL170W	YMR086C-A	YNL170W		YKL066W	YPR020W	YPR020W		YPR145C-A	YPR145C-A	YPR145C-A		YBL112C	YFL015C	YFL015C						YNL114C	YOR248W	YOR248W		YIL021C-A	YOR053W	YOR053W		YLL066W-B	YIL047C	YIL047C		YGR115C	YPR108W-A	YPR108W-A		YLL067C
YMR086C-A	YML047W-A	YMR086C-A		YDR003W-A	YDR322C-A	YDR322C-A		YNL244C	YNL244C	YNL244C		YHR218W-A	YLR169W	YLR169W						YLL037W	YDR114C	YDR114C		YLL009C	YLR198C	YLR198C		YOR265W	YOR189W	YOR189W		YJR162C	YAL059C-A	YAL059C-A
YIL029C	YJR067C	YIL029C		YJR067C	YAL047W-A	YAL047W-A		YLR388W	YNR025C	YLR388W		YFL015C	YEL039C	YEL039C						YHR039C-A	YDL085C-A	YDL085C-A		YBL109W	YNL114C	YNL114C		YOR268C	YMR214W	YMR214W		YCR108C	YPR145C-A	YPR145C-A
YPR014C	YFL041W-A	YPR014C		YKL096C-B	YPL119C-A	YPL119C-A		YNR025C	YLR388W	YNR025C		YLR169W	YPR145C-A	YPR145C-A						YDL096C	YIL021C-A	YIL021C-A		YAL059C-A	YJR162C	YJR162C		YBR058C-A	YFR010W-A	YFR010W-A		YLL009C	YOR265W	YOR265W
YJR073C	YNL170W	YJR073C		YPR020W	YBL039W-B	YBL039W-B		YHR136C	YHR136C	YHR136C		YEL039C	YJL202C	YJL202C						YBR089W	YDR544C	YDR544C		YFL063W	YGR008C	YGR008C		YJL026C-A	YBL059C-A	YBL059C-A		YLL065W	YOR053W	YOR053W
YAL008W	YJR073C	YAL008W		YDR322C-A	YPR100W	YPR100W		YLR252W	YOR309C	YLR252W		YPR145C-A	YLR154W-E	YLR154W-E						YPR108W-A	YER038W-A	YER038W-A		YGR228W	YHR180W-A	YHR180W-A		YOR234C	YJL184W	YJL184W		YGR008C	YGR169C-A	YGR169C-A
YOR102W	YKL083W	YOR102W		YMR269W	YBR244W	YBR244W		YNR034W-A	YEL050W-A	YNR034W-A		YJL202C	YDR163W	YDR163W						YNL266W	YOR309C	YOR309C		YJR140W-A	YNL266W	YNL266W		YMR325W	YGR164W	YGR164W		YGR164W	YOR309C	YOR309C
YOL164W-A	YEL039C	YOL164W-A		YBL039W-B	YGR182C	YGR182C		YKL066W	YHR081W	YKL066W		YNL338W	YMR107W	YMR107W						YOL014W	YJL189W	YJL189W		YCR108C	YLL065W	YLL065W		YLR388W	YFR036W	YFR036W		YER038W-A	YGR228W	YGR228W
YKL083W	YOR329W-A	YKL083W		YPR100W	YNR034W-A	YNR034W-A		YGR169C-A	YGR169C-A	YGR169C-A		YLR154W-E	YDL181W	YDL181W						YJL026C-A	YPR145C-A	YPR145C-A		YNL114C	YPR142C	YPR142C		YLR062C	YDR363W-A	YDR363W-A		YGL188C	YJL026C-A	YJL026C-A
YML047W-A	YIL029C	YML047W-A		YBR244W	YLR252W	YLR252W		YOR309C	YLR252W	YOR309C		YDR163W	YOR215C	YOR215C						YGL061C	YDL121C	YDL121C		YOR053W	YGL061C	YGL061C		YLR198C	YDL075W	YDL075W		YPR108W-A	YAL045C	YAL045C
YCL056C	YHR130C	YCL056C		YGR182C	YOL162W	YOL162W		YHR081W	YKL066W	YHR081W		YNL097W-A	YHR007C-A	YHR007C-A						YAR075W	YOR189W	YOR189W		YLR198C	YJL026C-A	YJL026C-A		YER067C-A	YNL017C	YNL017C		YAL059C-A	YDR070C	YDR070C
YHR130C	YDR118W-A	YHR130C		YNR034W-A	YIL040W	YIL040W		YOR102W	YNR034W-A	YOR102W		YMR107W	YOL077W-A	YOL077W-A						YDR114C	YMR003W	YMR003W		YGR008C	YDL085C-A	YDL085C-A		YNL114C	YOR231W	YOR231W		YPR145C-A	YFR010W-A	YFR010W-A
YFL031C-A	YAL008W	YFL031C-A		YLR252W	YCL056C	YCL056C		YEL050W-A	YFL015C	YEL050W-A		YDL181W	YBL109W	YBL109W						YDL085C-A	YLR200W	YLR200W		YJR162C	YFR010W-A	YFR010W-A		YAL045C	YGL226W	YGL226W		YKL225W	YNL114C	YNL114C
YLR262C-A	YOR102W	YLR262C-A		YOL150C	YMR251W-A	YMR251W-A		YLL009C	YOR102W	YLL009C		YOR215C	YDR119W-A	YDR119W-A						YIL021C-A	YJR034W	YJR034W		YGL188C	YJR034W	YJR034W		YLL037W	YOR291W	YOR291W		YOR265W	YLR198C	YLR198C
YBR056W	YCL056C	YBR056W		YIL040W	YBL077W	YBL077W		YJL188C	YLR264C-A	YJL188C		YOL077W-A	YCL048W-A	YCL048W-A						YER038W-A	YLR185W	YLR185W		YNL266W	YDR500C	YDR500C		YJL189W	YJL202C	YJL202C		YOR053W	YFL063W	YFL063W
YKL065W-A	YLR262C-A	YKL065W-A		YPL119C-A	YBR032W	YBR032W		YOR285W	YLL009C	YOR285W		YDR119W-A	YMR175W	YMR175W						YDR544C	YKL122C	YKL122C		YPR142C	YJL202C	YJL202C		YLR185W	YDL061C	YDL061C		YGR169C-A	YPR142C	YPR142C
YCR102C	YCR102C	YCR102C		YMR251W-A	YLR444C	YLR444C		YLR264C-A	YML047W-A	YLR264C-A		YHR007C-A	YJL189W	YJL189W						YOR248W	YER067C-A	YER067C-A		YHR180W-A	YGR169C-A	YGR169C-A		YDR445C	YLR388W	YLR388W		YOR309C	YDR544C	YDR544C
YNL259C	YOR293C-A	YNL259C		YCL056C	YJR112W-A	YJR112W-A		YDR031W	YJL188C	YDR031W		YCL048W-A	YFR001W	YFR001W						YOR309C	YDR022C	YDR022C		YJL026C-A	YDL096C	YDL096C		YNL338W	YML026C	YML026C		YGR228W	YDL096C	YDL096C
YOR170W	YOR170W	YOR170W		YOL162W	YJR073C	YJR073C		YFL015C	YDR031W	YFL015C		YMR175W	YLR264C-A	YLR264C-A						YJL189W	YBL053W	YBL053W		YGL061C	YMR269W	YMR269W		YOL014W	YMR294W-A	YMR294W-A		YJL026C-A	YJL202C	YJL202C
YLR076C	YGR294W	YLR076C		YBL077W	YPR059C	YPR059C		YHR219W	YOR285W	YHR219W		YJL189W	YLL009C	YLL009C						YPR145C-A	YDL069C	YDL069C		YKL096C-B	YKL122C	YKL122C		YDL085C-A	YBR089C-A	YBR089C-A		YAL045C	YDL085C-A	YDL085C-A
YDR118W-A	YBR056W	YDR118W-A		YDR381C-A	YBR085C-A	YBR085C-A		YML047W-A	YHR219W	YML047W-A		YLL009C	YLL065W	YLL065W						YOR189W	YJR023C	YJR023C		YDL085C-A	YOR189W	YOR189W		YMR272W-A	YOR234C	YOR234C		YDR070C	YAL069W	YAL069W
YMR251W-A	YKL065W-A	YMR251W-A		YGR139W	YDR381C-A	YDR381C-A		YLR408C	YLR068W	YLR408C		YLR408C	YLR408C	YLR408C						YDL121C	YCR020W-B	YCR020W-B		YFR010W-A	YGL152C	YGL152C		YOL013W-A	YKL202W	YKL202W		YFR010W-A	YJR034W	YJR034W
YOL002C	YNL259C	YOL002C		YJR073C	YOR148C	YOR148C		YDR119W-A	YLR408C	YDR119W-A		YFR001W	YIL008W	YIL008W						YMR003W	YGR228W	YGR228W		YJR034W	YLR200W	YLR200W		YNL266W	YGR228W	YGR228W		YNL114C	YMR175W	YMR175W
YMR173W-A	YML133C	YMR173W-A		YBR085C-A	YLR036C	YLR036C		YLR068W	YJL032W	YLR068W		YLR264C-A	YDR544C	YDR544C						YJR034W	YHR152W	YHR152W		YLL065W	YAL069W	YAL069W		YBL053W	YDL096C	YDL096C		YLR198C	YNL266W	YNL266W
YML133C	YOL106W	YML133C		YJR112W-A	YBR013C	YBR013C		YLR169W	YDR119W-A	YLR169W		YBL109W	YGR228W	YGR228W						YLR200W	YBL108C-A	YBL108C-A		YDR500C	YBL068W-A	YBL068W-A		YDR114C	YGL152C	YGL152C		YPR142C	YCL073C	YCL073C
YOR293C-A	YLR076C	YOR293C-A		YBR013C	YDR373W	YDR373W		YMR251W-A	YLR169W	YMR251W-A		YIL008W	YML062C	YML062C						YLR185W	YGL152C	YGL152C		YJL202C	YCL022C	YCL022C		YHR217C	Q0065	Q0065		YDR544C	YOR146W	YOR146W
YEL033W	YOL002C	YEL033W		YLR036C	YJL169W	YJL169W		YJL032W	YMR251W-A	YJL032W		YML062C	YBL039W-B	YBL039W-B						YER067C-A	YMR294W-A	YMR294W-A		YGR169C-A	YPR145C-A	YPR145C-A		YDR022C	YPL250C	YPL250C		YMR325W	YIL021C-A	YIL021C-A
YOL106W	YMR251W-A	YOL106W		YOR148C	YOL164W-A	YOL164W-A		YCR097W	YDR139C	YCR097W		YGR228W	YDR512C	YDR512C						YKL122C	YGR082W	YGR082W		YDL096C	YDL121C	YDL121C		YLL065W	YLR275W	YLR275W		YDL096C	YDR500C	YDR500C
YDR373W	YMR173W-A	YDR373W		YAL047W-A	YOR121C	YOR121C		YDR139C	YCR097W	YDR139C		YBL039W-B	YBL001C	YBL001C						YBL053W	YFR003C	YFR003C		YMR269W	YOR146W	YOR146W		YJR034W	YDL062W	YDL062W		YJL202C	YDR445C	YDR445C
YOR148C	YNL319W	YOR148C		YDR373W	YBR012C	YBR012C		YNL162W	YLR285C-A	YNL162W		YDR512C	YKL018C-A	YKL018C-A						YDR022C	YJL202C	YJL202C		YKL122C	YDR114C	YDR114C		YOR189W	YDR063W	YDR063W		YDL085C-A	YFR003C	YFR003C
YLR080W	YEL033W	YLR080W		YKL053C-A	YKL053C-A	YKL053C-A		YHR039C-A	YNL162W	YHR039C-A		YBL001C	YGR182C	YGR182C						YDL069C	YGL041C-B	YGL041C-B		YOR189W	YNL079C	YNL079C		YLR200W	YFR032C-A	YFR032C-A		YFL063W	YOR189W	YOR189W
YLR154W-F	YLR342W-A	YLR154W-F		YOR121C	YIR030W-A	YIR030W-A		YFR052C-A	YHR039C-A	YFR052C-A		YOR108C-A	YNR077C	YNR077C						YJR023C	YDR133C	YDR133C		YGL152C	YBR058C-A	YBR058C-A		YER038W-A	YDR278C	YDR278C		YJR034W	YDR063W	YDR063W
YBR226C	YJL169W	YBR226C		YGR209C	YGR209C	YGR209C		YLR285C-A	YJL202C	YLR285C-A		YDR544C	YDR031W	YDR031W						YCR020W-B	YLR388W	YLR388W		YLR200W	YHR039C-A	YHR039C-A		YGL061C	YCR020W-B	YCR020W-B		YAL069W	YDR281C	YDR281C
YKL053C-A	YOR148C	YKL053C-A		YBR032W	YAL008W	YAL008W		YGR209C	YFR052C-A	YGR209C		YGR182C	YLR285C-A	YLR285C-A						YGR228W	YFR010W-A	YFR010W-A		YCL022C	YHR152W	YHR152W		YFR003C	YHL031C	YHL031C		YMR175W	YAL055W	YAL055W
YBR164C	YBR226C	YBR164C		YAL008W	YBR258C	YBR258C		YJL202C	YGR209C	YJL202C		YKL018C-A	YFR032C-A	YFR032C-A						YHR152W	YML053C	YML053C		YPR145C-A	YAR075W	YAR075W		YMR003W	YOR378W	YOR378W		YNL266W	YGL061C	YGL061C
YDL016C	YMR119W-A	YDL016C		YLR444C	YAL063C-A	YAL063C-A		YHR141C	YLR222C-A	YHR141C		YDR031W	YMR039C	YMR039C						YGL152C	YGL188C	YGL188C		YOR146W	YFR033C	YFR033C		YBL108C-A	YDL085C-A	YDL085C-A		YIL021C-A	YGR236C	YGR236C
YMR119W-A	YBR056C-B	YMR119W-A		YBR258C	YCR097W	YCR097W		YPL225W	YPL225W	YPL225W		YLL065W	YBR027C	YBR027C						YMR294W-A	YMR194W	YMR194W		YDL121C	YGL041C-B	YGL041C-B		YHR039C-A	YLR021W	YLR021W		YOR146W	YLR200W	YLR200W
YCR098C	YDL016C	YCR098C		YMR173W-A	YLR251W	YLR251W		YBR285W	YHR141C	YBR285W		YFR032C-A	YPR087W	YPR087W						YGR082W	YHR087W	YHR087W		YDR114C	YFR003C	YFR003C		YJL202C	YMR194W	YMR194W		YCL073C	YJR087W	YJR087W
YJL169W	YLR154W-F	YJL169W		YLR251W	YMR173W-A	YMR173W-A		YOR182C	YHR217C	YOR182C		YLR285C-A	YNL017C	YNL017C						YJL202C	YPL250C	YPL250C		YNL079C	YDR022C	YDR022C		YML053C	YIL177C	YIL177C		YDR500C	YML030W	YML030W
YPL080C	YPL080C	YPL080C		YBR012C	YHR138C	YHR138C		YNL170W	YNL170W	YNL170W		YMR039C	YJR087W	YJR087W						YFR003C	YBL059C-A	YBL059C-A		YBR058C-A	YHL031C	YHL031C		YDR063W	YLR466C-B	YLR466C-B		YDR445C	YKL122C	YKL122C
YCR018C-A	YDR373W	YCR018C-A		YCR097W	YOL002C	YOL002C		YKL053C-A	YBR285W	YKL053C-A		YPR087W	YNL244C	YNL244C						YGL041C-B	YHL031C	YHL031C		YHR039C-A	YCL073C	YCL073C		YCR108C	YKR073C	YKR073C		YFR003C	YFR033C	YFR033C
YPR100W	YBR144C	YPR100W		YHR138C	YBR056W	YBR056W		YLR076C	YOR182C	YLR076C		YBR027C	YDR139C	YDR139C						YDR133C	YLR466C-A	YLR466C-A		YHR152W	YPL250W-A	YPL250W-A		YOR309C	YDR535C	YDR535C		YOR189W	YDR022C	YDR022C
YHR138C	YLR080W	YHR138C		YIR030W-A	YML047W-A	YML047W-A		YCL048W-A	YKL053C-A	YCL048W-A		YJR087W	YBR230W-A	YBR230W-A						YLR388W	YLR467C-A	YLR467C-A		YFR033C	YAL055W	YAL055W		YGL188C	YMR197C			YDR281C	YDR114C	YDR114C
YDL222C	YBR164C	YDL222C		YBR056W	YNR074C	YNR074C		YIL105W-A	YLR076C	YIL105W-A		YNR077C	YLR080W	YLR080W						YFR010W-A	YOR396C-A	YOR396C-A		YGL041C-B	YML030W	YML030W		YJR087W	YOR232W			YDR063W	YNL079C	YNL079C
YIL040W	YKL053C-A	YIL040W		YJL169W	YGL161C	YGL161C		YER019C-A	YCL048W-A	YER019C-A		YNL244C	YBR285W	YBR285W						YML053C	YAR030C	YAR030C		YFR003C	YPL124W	YPL124W		YGR228W	YKR085C			YAL055W	YER067C-A	YER067C-A
YLR342W-A	YIR030W-A	YLR342W-A		YGL161C	YDL067C	YDL067C		YHR217C	YIL105W-A	YHR217C		YNL017C	YHR001W-A	YHR001W-A						YMR194W	YLR021W	YLR021W		YAL069W	YPR108W-A	YPR108W-A		YOL109W	YOR198C			YGL061C	YGL152C	YGL152C
YNR074C	YNR074C	YNR074C		YOL164W-A	YGR057C	YGR057C		YOL077W-A	YER019C-A	YOL077W-A		YLR080W	YDR424C	YDR424C						YHR087W	YOL109W	YOL109W		YDR022C	YDR363W-A	YDR363W-A		YLR466C-A	YCR003W			YLR200W	YOR215C	YOR215C
YIR030W-A	YCR018C-A	YIR030W-A		YOL002C	YGR219W	YGR219W		YOR369C	YOL077W-A	YOR369C		YBR285W	YML030W	YML030W						YPL250C	YPR158W	YPR158W		YAR075W	YJR087W	YJR087W		YOR396C-A	YMR028W			YGR236C	YML098W	YML098W
YPR204W	YJL127C-B	YPR204W		YNR074C	YOR192C-C	YOR192C-C		YGR183C	YOR369C	YGR183C		YBR230W-A	YLR051C	YLR051C						YBL059C-A	YLR444C	YLR444C		YHL031C	YDR162C	YDR162C		YLR467C-A	YOL077W-A			YOL161C	YGL029W	YGL029W
YGR057C	YCR098C	YGR057C		YGR057C	YMR150C	YMR150C		YBL001C	YLR146W-A	YBL001C		YDR139C	YDR374W-A	YDR374W-A						YHL031C	YCR108C	YCR108C		YPL250W-A	YOR304C-A	YOR304C-A		YFR010W-A	YPL225W			YJR087W	YMR269W	YMR269W
YDR322C-A	YER053C-A	YDR322C-A		YGR219W	YOL106W	YOL106W		YLR146W-A	YCR020W-B	YLR146W-A		YHR001W-A	YKL076C	YKL076C						YAR030C	YDL062W	YDL062W		YBL068W-A	YDR119W-A	YDR119W-A		YDR070C	YCL050C			YML030W	YDR210W	YDR210W
YMR150C	YIL040W	YMR150C		YDL067C	YPR010C-A	YPR010C-A		YLR167W	YAL016C-B	YLR167W		YDR424C	YMR311C	YMR311C						YLR021W	YJR087W	YJR087W		YAL055W	YDR199W	YDR199W		YKL122C	YJR050W			YKL122C	YGR146C	YGR146C
YER053C-A	YPR100W	YER053C-A		YPR010C-A	YNL150W	YNL150W		YCR020W-B	YGR183C	YCR020W-B		YML030W	YOR089C	YOR089C						YLR466C-A	YFR036W	YFR036W		YML030W	YJL184W	YJL184W		YHR087W	YML073C			YFR033C	YLR438C-A	YLR438C-A
YMR143W	YHR138C	YMR143W		YMR150C	YOR253W	YOR253W		YPR002C-A	YBL001C	YPR002C-A		YDR374W-A	YOR257W	YOR257W						YLR467C-A	YPL250W-A	YPL250W-A		YPL124W	YJR099W	YJR099W		YBR089W	YDL147W			YDR022C	YLR458W	YLR458W
YPL139C	YDL222C	YPL139C		YNL150W	YCR018C-A	YCR018C-A		YDR034C-A	YPR002C-A	YDR034C-A		YMR311C	YFR010W-A	YFR010W-A						YOR396C-A	YKL083W	YKL083W		YDR363W-A	YBL031W	YBL031W		YDL069C	YOR276W			YNL079C	YHR152W	YHR152W
YNL319W	YPL139C	YNL319W		YOR192C-C	YDL016C	YDL016C		YLR222C-A	YLR167W	YLR222C-A		YKL076C	YOR285W	YOR285W						YOL109W	YGR146C	YGR146C		YJR087W	YGR146C	YGR146C		YJL188C	YOR367W			YDR114C	YGR114C	YGR114C
YBR056C-B	YDR322C-A	YBR056C-B		YPR059C	YDR410C	YDR410C		YHR007C-A	YHR007C-A	YHR007C-A		YOR285W	YEL033W	YEL033W						YPR158W	YDR119W-A	YDR119W-A		YDR162C	YBR230C	YBR230C		YAR075W	YNL081C			YGL152C	YBL001C	YBL001C
YJL127C-B	YPR204W	YJL127C-B		YAL063C-A	YGR243W	YGR243W		YDR424C	YDR034C-A	YDR424C		YOR257W	YNL266W	YNL266W						YBL108C-A	YKR085C	YKR085C		YPR108W-A	YOR216C	YOR216C		YLL020C	YKR006C			YML098W	YGR259C	YGR259C
YJR112W-A	YMR150C	YJR112W-A		YOR253W	YGR141W	YGR141W		YER158W-A	YER158W-A	YER158W-A		YOR089C	YKL041W	YKL041W						YDL062W	YNL079C	YNL079C		YCL073C	YDR063W	YDR063W		YNL162W	YKR035C			YGL029W	YGL226W	YGL226W
YDR410C	YGR057C	YDR410C		YML047W-A	YLR080W	YLR080W		YKL136W	YFR001W	YKL136W		YLR051C	YHR060W	YHR060W						YFR036W	YPR142C	YPR142C		YOR304C-A	YGL029W	YGL029W		YKL083W	YDL002C			YOR215C	YDR363W-A	YDR363W-A
YGR075C	YDR410C	YGR075C		YLR080W	YBR164C	YBR164C		YML062C	YBR027C	YML062C		YFR010W-A	YIL032C	YIL032C						YJR087W	YLR146W-A	YLR146W-A		YDR199W	YML098W	YML098W		YGR146C	YHR060W			YER067C-A	YLR062C	YLR062C
YOR103C	YJR112W-A	YOR103C		YCR018C-A	YKL058W	YKL058W		YFR001W	YLL037W	YFR001W		YHR060W	YDL200C	YDL200C						YPL250W-A	YDR063W	YDR063W		YJL184W	YLR438C-A	YLR438C-A		YMR194W	YEL051W			YMR269W	YOL099C	YOL099C
YBR144C	YMR143W	YBR144C		YGR243W	YJR058C	YJR058C		YDR163W	YKL136W	YDR163W		YEL033W	YCR097W	YCR097W						YKL083W	YBL028C	YBL028C		YDR119W-A	YFR036W	YFR036W		YHR152W	YKL214C			YLR438C-A	YLR185W	YLR185W
YNL150W	YOR103C	YNL150W		YDR410C	YDR183C-A	YDR183C-A		YPR087W	YDR424C	YPR087W		YNL266W	YER030W	YER030W						YLR444C	YGL214W	YGL214W		YJR099W	YFR032C-A	YFR032C-A		YDL246C	YPR102C			YGR146C	YOR216C	YOR216C
YGL091C	YNL150W	YGL091C		YGR141W	YCL067C	YCL067C		YBR027C	YML062C	YBR027C		YDL200C	YDR199W	YDR199W						YGR146C	YJL184W	YJL184W		YGL029W	YDR070C	YDR070C		YMR294W-A	YOL038W			YHR152W	YDL181W	YDL181W
YJR058C	YGL091C	YJR058C		YKL058W	YCR039C	YCR039C		YDL181W	YDR163W	YDL181W		YKL041W	YDL153C	YDL153C						YCR108C	YOR304C-A	YOR304C-A		YGR146C	YOR218C	YOR218C		YDR133C	YER113C			YLR458W	YOL013W-A	YOL013W-A
YOR285W	YGR075C	YOR285W		YOL106W	YGR183C	YGR183C		YLL037W	YPR087W	YLL037W		YCR097W	YKR083C	YKR083C						YKR085C	YBR230C	YBR230C		YBL031W	YGL214W	YGL214W		YLR167W	YDR308C			YGR114C	YHR059W	YHR059W
YNR034W-A	YJR058C	YNR034W-A		YBR164C	YNR025C	YNR025C		YPR130C	YPR130C	YPR130C		YER030W	YDR063W	YDR063W						YDR119W-A	YKL013C	YKL013C		YOR216C	YDL062W	YDL062W		YGR259C	YNL131W			YDR210W	YBR058C-A	YBR058C-A
YLR211C	YNR034W-A	YLR211C		YJR058C	YMR256C	YMR256C		YJR135W-A	YJR135W-A	YJR135W-A		YDR199W	YHR039C-A	YHR039C-A						YNL079C	YGR204C-A	YGR204C-A		YLR438C-A	YDR510C-A	YDR510C-A		YHR059W	YDR071C			YBL001C	YPL124W	YPL124W
YKL058W	YGL226C-A	YKL058W		YDL016C	YIL020C-A	YIL020C-A		YKL076C	YDL181W	YKL076C		YKR083C	YPL225W	YPL225W						YPR142C	YBR173C	YBR173C		YBR230C	YJR023C	YJR023C		YKL156W	YJL190C			YGL226W	YOR218C	YOR218C
YGL226C-A	YOR285W	YGL226C-A		YGR183C	YNL100W	YNL100W		YDR500C	YKL076C	YDR500C		YDR063W	YPL013C	YPL013C						YDR063W	YDR510C-A	YDR510C-A		YML098W	YBL059C-A	YBL059C-A		YDL121C	YCR083W			YGR259C	YOL077W-A	YOL077W-A
YOR121C	YOR121C	YOR121C		YCL067C	YER142C	YER142C		YJR087W	YDR500C	YJR087W		YHR039C-A	YMR040W	YMR040W						YBL028C	YDR363W-A	YDR363W-A		YDR063W	YLL037W	YLL037W		YCR020W-B	YPR108W			YDR363W-A	YPL170W	YPL170W
YGL161C	YLR211C	YGL161C		YCR039C	YOR006C	YOR006C		YOR052C	YJR087W	YOR052C		YPL225W	YER158W-A	YER158W-A						YGL214W	YGR146C-A	YGR146C-A		YFR036W	YBL001C	YBL001C		YAR030C	YGR085C			YLR062C	YCL022C	YCL022C
YDL067C	YDL067C	YDL067C		YNL100W	YNL235C	YNL235C		YBL077W	YOR052C	YBL077W		YPL013C	YGR115C	YGR115C						YJL184W	YGR022C	YGR022C		YOR218C	YPL250C	YPL250C		YGR146C-A	YNR022C			YOL099C	YFR032C-A	YFR032C-A
YGR209C	YKL058W	YGR209C		YMR256C	YIL111W	YIL111W		YOR169C	YBL077W	YOR169C		YMR040W	YAL069W	YAL069W						YOR304C-A	YML036W	YML036W		YFR032C-A	YLR021W	YLR021W		YKL097C	YDR486C			YLR185W	YML053C	YML053C
YPR132W	YAL064W	YPR132W		YIL020C-A	YOR285W	YOR285W		YOR167C	YOR169C	YOR167C		YDL153C	YDR068W	YDR068W						YDR510C-A	YDR281C	YDR281C		YGL214W	YCR020W-B	YCR020W-B		YGL152C	YBR084C-A			YOR216C	YDR162C	YDR162C
YNL211C	YGL161C	YNL211C		YER142C	YML009C-A	YML009C-A		YMR256C	YOR167C	YMR256C		YGR115C	YJR157W	YJR157W						YKL013C	YPR126C	YPR126C		YDR070C	YER030W	YER030W		YLR021W	YLR325C			YCL069W	YER078W-A	YER078W-A
YDR381C-A	YPR132W	YDR381C-A		YIL111W	YEL072W	YEL072W		YNL017C	YLR051C	YNL017C		YDR068W	YPL170W	YPL170W						YBR230C	YER030W	YER030W		YDL062W	YOR215C	YOR215C		YBL109W	YKL013C			YDL181W	YHL031C	YHL031C
YBR230W-A	YGR209C	YBR230W-A		YOR285W	YJR157W	YJR157W		YPR010C-A	YNL017C	YPR010C-A		YHR136C	YHR136C	YHR136C						YBR173C	YKL156W	YKL156W		YLL037W	YGL226W	YGL226W		YDR544C	YOR158W			YHR059W	YJL184W	YJL184W
YBR013C	YBR027C	YBR013C		YDR183C-A	YMR143W	YMR143W		YIL008W	YIL008W	YIL008W		YER158W-A	YDL065C	YDL065C						YLR146W-A	YMR123W	YMR123W		YJR023C	YPR167C	YPR167C		YBL001C	YGL073W			YBR058C-A	YJR099W	YJR099W
YNL024C	YNL211C	YNL024C		YOR006C	YPL080C	YPL080C		YLR051C	YMR256C	YLR051C		YPL170W	YKL122C	YKL122C						YDR363W-A	YGR259C	YGR259C		YBL059C-A	YDL181W	YDL181W		YIL021C-A	YKL068W			YOR218C	YOR073W-A	YOR073W-A
YBR027C	YAL063C-A	YBR027C		YNR025C	YCR098C	YCR098C		YJR023C	YJR023C	YJR023C		YPR010C-A	YPR010C-A	YPR010C-A						YGR204C-A	YFR033C	YFR033C		YBL001C	YER067C-A	YER067C-A		YGR082W	YML009C			YPL124W	YPL186C	YPL186C
YER046W	YDR381C-A	YER046W		YMR143W	YLR242C	YLR242C		YBR085C-A	YBR085C-A	YBR085C-A		YDL065C	YLL020C	YLL020C						YGL188C	YDR339C	YDR339C		YDR510C-A	YGR259C	YGR259C		YJR023C	YIL138C			YOL077W-A	YDL121C	YDL121C
YNL070W	YBR230W-A	YNL070W		YEL072W	YNL303W	YNL303W		YLR466C-A	YPR010C-A	YLR466C-A		YJR157W	YNL079C	YNL079C						YML036W	YOR218C	YOR218C		YPL250C	YLR169W	YLR169W		YLR053C	YOR174W			YPL170W	YOR248W	YOR248W
YBR258C	YNL070W	YBR258C		YCR098C	YOR105W	YOR105W		YLR467C-A	YLR466C-A	YLR467C-A		YNL079C	YDR363W-A	YDR363W-A						YPR126C	YPR167C	YPR167C		YCR020W-B	YBL028C	YBL028C		YPL143W	YDR116C			YOL013W-A	YLR169W	YLR169W
YOR283W	YER046W	YOR283W		YLR242C	YCR102C	YCR102C		YOR396C-A	YLR467C-A	YOR396C-A		YKL122C	YOR265W	YOR265W						YDR281C	YBL001C	YBL001C		YKL224C	YLR458W	YLR458W		YOR167C	YBL057C			YCL022C	YDR521W	YDR521W
YOR289W	YNL024C	YOR289W		YNL235C	YLR460C	YLR460C		YBL053W	YOR396C-A	YBL053W		YOR265W	YJL148W	YJL148W						YER030W	YBR162W-A	YBR162W-A		YLR021W	YHR087W	YHR087W		YHR214C-E	YLR204W			YML053C	YER030W	YER030W
YJL142C	YOR283W	YJL142C		YML009C-A	YLR078C	YLR078C		YAL016C-B	YAR075W	YAL016C-B		YDR363W-A	YCR108C	YCR108C						YGR146C-A	YPL267W	YPL267W		YER030W	YKL138C-A	YKL138C-A		YER078W-A	YLR022C			YDR162C	YGL214W	YGL214W
YDR357C	YJL142C	YDR357C		YLR078C	YJL127C-B	YJL127C-B		YPR200C	YBL053W	YPR200C		YNR034W-A	YJL188C	YJL188C						YMR123W	YDL100C	YDL100C		YOR215C	YNL174W	YNL174W		YDR016C	YBR278W			YFR032C-A	YHR087W	YHR087W
YER074W-A	YBR258C	YER074W-A		YPL080C	YER053C-A	YER053C-A		YMR039C	YNL266W	YMR039C		YLL020C	YCR020W-B	YCR020W-B						YKL156W	YLL020C	YLL020C		YPR167C	YLR185W	YLR185W		YHL031C	YBR115C			YJL184W	YBL108C-A	YBL108C-A
YMR269W	YBR013C	YMR269W		YLR211C	YDR139C	YDR139C		YLR043C	YMR039C	YLR043C		YJL188C	YNR034W-A	YNR034W-A						YGR259C	YKL118W	YKL118W		YGL226W	YDL099W	YDL099W		YDR363W-A	YDR339C			YHL031C	YLR025W	YLR025W
YGR219W	YPL200W	YGR219W		YJR157W	YDR079W	YDR079W		YOR121C	YBR162W-A	YOR121C		YIL032C	YGR226C	YGR226C						YOR218C	YBR278W	YBR278W		YDL181W	YHR060W	YHR060W		YGL226W	YDR462W			YJR099W	YHL030W-A	YHL030W-A
YOR369C	YMR269W	YOR369C		YFR052C-A	YNL211C	YNL211C		YNL266W	YOR121C	YNL266W		YJL148W	YNL170W	YNL170W						YDR339C	YLR275W	YLR275W		YLR458W	YIL142C-A	YIL142C-A		YER030W	YOR164C			YOR073W-A	YGR146C-A	YGR146C-A
YAL064W	YIL032C	YAL064W		YNL303W	YFR052C-A	YFR052C-A		YOR215C	YPR200C	YOR215C		YCR020W-B	YNL215W	YNL215W						YFR033C	YLL065W	YLL065W		YLR169W	YML053C	YML053C		YPR142C	YDR135C			YDL121C	YKL036C	YKL036C
YBR085C-A	YMR194C-A	YBR085C-A		YDR079W	YLR211C	YLR211C		YFL017W-A	YFL017W-A	YFL017W-A		YBL107C	YPL186C	YPL186C						YPR167C	YJR099W	YJR099W		YGR259C	YCR083W	YCR083W		YGR204C-A	YBL107C			YLR169W	YDR199W	YDR199W
YPL114W	YMR230W-A	YPL114W		YDR357C	YDR357C	YDR357C		YCR018C-A	YCR018C-A	YCR018C-A		YGR226C	YBL107C	YBL107C						YBL001C	YBR089C-A	YBR089C-A		YBL028C	YNL180C	YNL180C		YER019C-A	YDL177C			YPL186C	YLL037W	YLL037W
YJR135W-A	YER074W-A	YJR135W-A		YOR103C	YIR039C	YIR039C		YBR162W-A	YJL148W	YBR162W-A		YPL186C	YJL049W	YJL049W						YPL267W	YOR277C	YOR277C		YER067C-A	YAR030C	YAR030C		YDL075W	YPL023C			YDR521W	YLR311C	YLR311C
YNR020C	YPL114W	YNR020C		YNL211C	YLL055W	YLL055W		YER030W	YOR215C	YER030W		YJL049W	YBR162W-A	YBR162W-A						YBR162W-A	YDR513W	YDR513W		YNL174W	YGR146C-A	YGR146C-A		YDR521W	YJL167W			YER030W	YKL097C	YKL097C
YMR230W-A	YOR289W	YMR230W-A		YDR139C	YOR103C	YOR103C		YBL039W-B	YLR043C	YBL039W-B		YNL170W	YKL066W	YKL066W						YDL100C	YBL031W	YBL031W		YHR087W	YMR003W	YMR003W		YDR067C	YPL249C-A			YGL214W	YFL012W	YFL012W
YCL038C	YDR003W-A	YCL038C		YLR460C	YKL065W-A	YKL065W-A		YDR373W	YER030W	YDR373W		YNL215W	YDR070C	YDR070C						YBR278W	YMR077C	YMR077C		YLR185W	YDR521W	YDR521W		YDR342C	YOR034C			YER078W-A	YDR512C	YDR512C
YLR036C	YDR357C	YLR036C		YIR039C	YHR007C-A	YHR007C-A		YLR038C	YKL156W	YLR038C		YKL066W	YBL028C	YBL028C						YKL118W	YEL003W	YEL003W		YKL138C-A	YBR278W	YBR278W		YGR018C	YIL022W			YLR025W	YLR041W	YLR041W
YNL171C	YGR219W	YNL171C		YER053C-A	YCR020C-A	YCR020C-A		YDR196C	YLR038C	YDR196C		YDR070C	YOR121C	YOR121C						YMR272W-A	YKL138C-A	YKL138C-A		YDL099W	YDR253C	YDR253C		YFR036W	YPL094C			YHL030W-A	YOL108C	YOL108C
YGR046W	YOR369C	YGR046W		YKL065W-A	YPL038W-A	YPL038W-A		YKL156W	YBL039W-B	YKL156W		YAL069W	YHR121W	YHR121W						YLR275W	YDR199W	YDR199W		YCR083W	YOR082C	YOR082C		YCR013C	YMR238W			YHR087W	YKL018C-A	YKL018C-A
YAL063C-A	YNR020C	YAL063C-A		YCR102C	YNL244C	YNL244C		YJL148W	YDR373W	YJL148W		YOR121C	YCL056C	YCL056C						YJR099W	YML101C	YML101C		YIL142C-A	YMR123W	YMR123W		YJL184W	YPR025C			YKL036C	YLR021W	YLR021W
YEL072W	YJR135W-A	YEL072W		YJL127C-B	YHR081W	YHR081W		YOR053W	YDL067C	YOR053W		YBR162W-A	YPR142C	YPR142C						YBR089C-A	YML026C	YML026C		YHR060W	YKL118W	YKL118W		YLR334C	YPL145C			YDR199W	YPR150W	YPR150W
YHR140W	YBR085C-A	YHR140W		YLL055W	YIL165C	YIL165C		YDL067C	YDR196C	YDL067C		YHR121W	YDR196C	YDR196C						YLL020C	YJL011C	YJL011C		YML053C	YOR073W-A	YOR073W-A		YGL214W	YNL122C			YOR248W	YFR036W	YFR036W
YPL189C-A	YCL038C	YPL189C-A		YOR105W	YHL012W	YHL012W		YDR381C-A	YGR271C-A	YDR381C-A		YCL056C	YOR052C	YOR052C						YKL225W	YGL226W	YGL226W		YNL180C	YJR005C-A	YJR005C-A		YOR146W	YPR133C			YLR311C	YHR039C-A	YHR039C-A
YER042W	YLR036C	YER042W		YCR020C-A	YDL153C	YDL153C		YNL150W	YOR053W	YNL150W		YDR196C	YMR284W	YMR284W						YBL031W	YDR521W	YDR521W		YAR030C	YBL108C-A	YBL108C-A		YLR275W	YBR193C			YGR146C-A	YHR060W	YHR060W
YCR024C-B	YNL171C	YCR024C-B		YHR007C-A	YDR005C	YDR005C		YDR513W	YNL150W	YDR513W		YBL028C	YHR191C	YHR191C						YOR277C	YOR146W	YOR146W		YDR521W	YDR512C	YDR512C		YNL079C	YOR281C			YFL012W	YDL099W	YDL099W
YMR175W	YGR046W	YMR175W		YNL244C	YBR210W	YBR210W		YBR111W-A	YLR275W	YBR111W-A		YOR052C	YDR379C-A	YDR379C-A						YDR513W	YHR071W	YHR071W		YMR003W	YLL047W	YLL047W		YOR218C	YPL037C			YLL037W	YBL031W	YBL031W
YPR010C-A	YEL072W	YPR010C-A		YBR210W	YDR031W	YDR031W		YPR132W	YDR381C-A	YPR132W		YMR284W	YDL085C-A	YDL085C-A						YGR022C	YDR067C	YDR067C		YGR146C-A	YKR085C	YKR085C		YDL062W	YCR071C			YOL108C	YOR304C-A	YOR304C-A
YOR006C	YPL189C-A	YOR006C		YDR031W	YJR135W-A	YJR135W-A		YGR271C-A	YBL028C	YGR271C-A		YPL123C	YPL123C	YPL123C						YMR077C	YLR298C	YLR298C		YBR278W	YBR162W-A	YBR162W-A		YPL250C	YFL013W-A			YDR512C	YDL041W	YDL041W
YDR003W-A	YPL187W	YDR003W-A		YDR005C	YKL162C-A	YKL162C-A		YDR512C	YBR111W-A	YDR512C		YDR379C-A	YLR262C-A	YLR262C-A						YEL003W	YGR018C	YGR018C		YOR082C	YDR163W	YDR163W		YBL059C-A	YDR226W			YFR036W	YGL108C	YGL108C
YMR107W	YHR140W	YMR107W		YHL012W	YLR227C	YLR227C		YDR063W	YPR132W	YDR063W		YHR191C	YLR327C	YLR327C						YLL065W	YJL188C	YJL188C		YDR253C	YFL013W-A	YFL013W-A		YJL009W	YGR076C			YLR021W	YOL109W	YOL109W
YIL032C	YDL232W	YIL032C		YIL165C	YER044C	YER044C		YLR275W	YDR513W	YLR275W		YDL085C-A	YDR529C	YDR529C						YDR199W	YCR083W	YCR083W		YMR123W	YMR077C	YMR077C		YML026C	YDL100C			YHR039C-A	YDR163W	YDR163W
YER046W-A	YER046W-A	YER046W-A		YJR135W-A	YER042W	YER042W		YBL028C	YDR512C	YBL028C		YPR142C	YLR275W	YLR275W						YML101C	YHR059W	YHR059W		YOR073W-A	YPL267W	YPL267W		YLR311C	YNR017W			YKL018C-A	YDR119W-A	YDR119W-A
YPR109W	YOR006C	YPR109W		YHR081W	YEL033W	YEL033W		YDL050C	YDR063W	YDL050C		YCR108C	YLR423C	YLR423C						YKL138C-A	YFL058W	YFL058W		YKL118W	YML036W	YML036W		YBL028C	YKL117W			YLR041W	YDL062W	YDL062W
YKL001C	YER042W	YKL001C		YLR227C	YIL027C	YIL027C		YHR072W-A	YDL050C	YHR072W-A		YLR262C-A	YLR290C	YLR290C						YML026C	YEL051W	YEL051W		YCL069W	YLR068W	YLR068W		YFR033C	YGL188C-A			YPR150W	YGR226C	YGR226C
YDR058C	YCR024C-B	YDR058C		YDL153C	YMR107W	YMR107W		YAR075W	YHR072W-A	YAR075W		YLR327C	YBR085C-A	YBR085C-A						YDR521W	YOR276W	YOR276W		YLL047W	YFL012W	YFL012W		YML028W	YBR173C			YHR060W	YPL013C	YPL013C
YLL055W	YMR175W	YLL055W		YER044C	YPL052W	YPL052W		YBR047W	YBR047W	YBR047W		YDR529C	YKL082C	YKL082C						YGL226W	YAL030W	YAL030W		YDR512C	YPR158W	YPR158W		YOR182C	YJL140W			YDL099W	YFL013W-A	YFL013W-A
YPL271W	YLL055W	YPL271W		YER042W	YGL091C	YGL091C		YLR367W	YKL122C	YLR367W		YAR070C	YLR038C	YLR038C						YOR146W	YOR234C	YOR234C		YJR005C-A	YOL077W-A	YOL077W-A		YFL058W	YGR118W			YOR304C-A	YLR053C	YLR053C
YDL135C	YMR107W	YDL135C		YDR315C	YDR315C	YDR315C		YKL122C	YLR367W	YKL122C		YLR290C	YIL086C	YIL086C						YJL011C	YMR197C	YMR197C		YBR162W-A	YGR082W	YGR082W		YBR089C-A	YBR295W			YBL108C-A	YPL108W	YPL108W
YIL060W	YPR010C-A	YIL060W		YOR289W	YOR289W	YOR289W		YDR079W	YOR199W	YDR079W		YLR423C	YKL136W	YKL136W						YHR071W	YDR342C	YDR342C		YKR085C	YDL005C	YDL005C		YDR343C	YKL137W			YBL031W	YNL174W	YNL174W
YGR141W	YPR109W	YGR141W		YMR107W	YLR046C	YLR046C		YIL111W	YDR079W	YIL111W		YBR085C-A	YIL098C	YIL098C						YDR067C	YNL174W	YNL174W		YDR163W	YOL109W	YOL109W		YDL061C	YDR168W			YDL041W	YLR334C	YLR334C
YPR002C-A	YKL001C	YPR002C-A		YPL052W	YJR010C-A	YJR010C-A		YPL123C	YIL111W	YPL123C		YLR275W	YIR024C	YIR024C						YLR298C	YDR162C	YDR162C		YFL013W-A	YHR059W	YHR059W		YJR047C	YJR099W			YKL097C	YGR018C	YGR018C
YGR063C	YPL271W	YGR063C		YIL027C	YBR166C	YBR166C		YOR199W	YDR183C-A	YOR199W		YIL086C	YLR252W	YLR252W						YCR083W	YDR391C	YDR391C		YMR077C	YJL189W	YJL189W		YPR044C	YGL140C			YGL108C	YJL189W	YJL189W
YLR078C	YDR058C	YLR078C		YKL162C-A	YLR408C	YLR408C		YBL107C	YPL123C	YBL107C		YLR038C	YJR023C	YJR023C						YJL188C	YBR285W	YBR285W		YLR068W	YDL100C	YDL100C		YHR136C	YMR039C			YOL109W	YGL041C-B	YGL041C-B
YPL200W	YPR002C-A	YPL200W		YEL033W	YDR413C	YDR413C		YDR016C	YBL107C	YDR016C		YIL098C	YKL162C-A	YKL162C-A						YGR018C	YEL034C-A	YEL034C-A		YPL267W	YGR114C	YGR114C		YNL042W-B	YAL026C			YDR163W	YBL028C	YBL028C
YHR136C	YIL060W	YHR136C		YBR166C	YKR074W	YKR074W		YDR183C-A	YDL136W	YDR183C-A		YKL136W	YGR243W	YGR243W						YHR059W	YJL009W	YJL009W		YFL012W	YMR194W	YMR194W		YNL014W	YBL072C			YDL062W	YCR013C	YCR013C
YMR194C-A	YGR141W	YMR194C-A		YGL091C	YGL226C-A	YGL226C-A		YER074W-A	YER074W-A	YER074W-A		YIR024C	YDL130W-A	YDL130W-A						YOR276W	YNR032C-A	YNR032C-A		YOL077W-A	YOL099C	YOL099C		YBR063C	YBL092W			YDR119W-A	YOL054W	YOL054W
YDR183C-A	YDR183C-A	YDR183C-A		YLR408C	YLR043C	YLR043C		YDL136W	YJR162C	YDL136W		YLR252W	YDR468C	YDR468C						YEL051W	YJL007C	YJL007C		YML036W	YLR298C	YLR298C		YER152C	YPL213W			YPL013C	YBL059C-A	YBL059C-A
YLR408C	YGR063C	YLR408C		YLR043C	YLR342W-A	YLR342W-A		YDL200C	YOL002C	YDL200C		YKL082C	YJR135W-A	YJR135W-A						YMR197C	YPL094C	YPL094C		YPR158W	YLR275W	YLR275W		YMR031W-A	YBR146W			YFL013W-A	YDL130W-A	YDL130W-A
YML062C	YDL135C	YML062C		YGR232W	YGR232W	YGR232W		YKL137W	YDR016C	YKL137W		YGR243W	YIL138C	YIL138C						YDR342C	YLR167W	YLR167W		YGR082W	YPR126C	YPR126C		YKL187C	YGR253C			YNL174W	YPR167C	YPR167C
YIL136W	YLR078C	YIL136W		YDR196C	YDR196C	YDR196C		YOR289W	YLR154W-E	YOR289W		YJR023C	YJL115W	YJL115W						YAL030W	YLR169W	YLR169W		YDL005C	YFR001W	YFR001W		YGR141W	YPR148C			YPL108W	YAR030C	YAR030C
YML009C-A	YML009C-A	YML009C-A		YKR074W	YCR024C-B	YCR024C-B		YLR154W-E	YKL137W	YLR154W-E		YDL130W-A	YDL067C	YDL067C						YNL174W	YDR092W	YDR092W		YHR059W	YMR294W-A	YMR294W-A		YPL246C	YML059C			YMR272W-A	YFR036W-A	YFR036W-A
YLR361C-A	YHR136C	YLR361C-A		YJR010C-A	YHR121W	YHR121W		YPL271W	YDL200C	YPL271W		YDR468C	YHR049C-A	YHR049C-A						YDR162C	YPL136W	YPL136W		YJL189W	YJR076C	YJR076C		YFL061W	YLR298C			YGR226C	YIL177W-A	YIL177W-A
YBR012C	YML062C	YBR012C		YLR046C	YPR012W	YPR012W		YOL002C	YPL038W-A	YOL002C		YKL162C-A	YPR130C	YPR130C						YDR391C	YGR142W	YGR142W		YOL109W	YDR158W	YDR158W		YPL134C	YOR238W			YLR334C	YJL225W-A	YJL225W-A
YDL232W	YBR012C	YDL232W		YGL226C-A	YGR046W	YGR046W		YJL179W	YHR049C-A	YJL179W		YJL115W	YOR194C	YOR194C						YOR234C	YDR158W	YDR158W		YGR114C	YMR118C	YMR118C		YBR220C	YML041C			YGR018C	YBR090C	YBR090C
YNL067W	YLR408C	YNL067W		YCR024C-B	YDL135C	YDL135C		YLR251W	YPL271W	YLR251W		YIL138C	YLR154W-F	YLR154W-F						YFL058W	YNL285W	YNL285W		YLR298C	YBR201W	YBR201W		YKR073C	YFR010W			YBL028C	YOR082C	YOR082C
YOR089C	YOR089C	YOR089C		YDR413C	YNL024C	YNL024C		YLR456W	YOR289W	YLR456W		YJR135W-A	YDR079W	YDR079W						YEL034C-A	YCR071C	YCR071C		YDL100C	YPL094C	YPL094C		YMR279C	YMR242C			YJL189W	YLR068W	YLR068W
YDR005C	YLR361C-A	YDR005C		YHR121W	YJL031C	YJL031C		YJR067C	YMR294W-A	YJR067C		YDL067C	YGR271C-A	YGR271C-A						YBR285W	YJR047C	YJR047C		YMR194W	YBR090C	YBR090C		Q0055	YLR169W			YLR053C	YBR230W-A	YBR230W-A
YGR182C	YIL136W	YGR182C		YDL135C	YOL048C	YOL048C		YIL014C-A	YGR228W	YIL014C-A		YOL048C	YOL048C	YOL048C						YJL009W	YGL058W	YGL058W		YLR275W	YGR018C	YGR018C		YPR016W-A	YBR211C			YGL041C-B	YPL250C	YPL250C
YPL197C	YNL067W	YPL197C		YOL048C	YNL147W	YNL147W		YMR294W-A	YJL179W	YMR294W-A		YPR130C	YGR183C	YGR183C						YNR032C-A	YDR253C	YDR253C		YPR126C	YGR236C	YGR236C		YJL175W	YDL136W			YOL054W	YDR253C	YDR253C
YNL200C	YPL197C	YNL200C		YPL038W-A	YDL115C	YDL115C		YGR228W	YDR544C	YGR228W		YGR183C	YIL136W	YIL136W						YJL007C	YOR216C	YOR216C		YFR001W	YGR142W	YGR142W		YKR045C	YPR158W			YCR013C	YLR275W	YLR275W
YOR253W	YDR005C	YOR253W		YGR046W	YNL336W	YNL336W		YHR049C-A	YLR456W	YHR049C-A		YDR079W	YBR290W	YBR290W						YPL094C	YCL059C	YCL059C		YOL099C	YBR089C-A	YBR089C-A		YOR231W	YPR188C			YFR036W-A	YKR083C	YKR083C
YBR024W	YGR182C	YBR024W		YJL031C	YNR020C	YNR020C		YMR284W	YJR067C	YMR284W		YOR194C	YLR361C-A	YLR361C-A						YLR167W	YDL005C	YDL005C		YMR294W-A	YDL069C	YDL069C		YJL079C	YDR162C			YPR167C	YPR131C	YPR131C
YNL244C	YDL153C	YNL244C		YNL147W	YIL103W	YIL103W		YDR363W-A	YLR251W	YDR363W-A		YIL136W	YML098W	YML098W						YLR169W	YGL029W	YGL029W		YMR118C	YGL158W	YGL158W		YGL205W	YHR028C			YBL059C-A	YMR003W	YMR003W
YGR243W	YBR024W	YGR243W		YDL222C	YDL222C	YDL222C		YMR311C	YIL014C-A	YMR311C		YLR154W-F	YOR102W	YOR102W						YKL224C	YLR438C-A	YLR438C-A		YJR076C	YKL013C	YKL013C		YHR213W	YKL203C			YBR090C	YBR269C	YBR269C
YIL086C	YOR253W	YIL086C		YNL024C	YER074W-A	YER074W-A		YOR293W	YDR363W-A	YOR293W		YLR361C-A	YNL162W	YNL162W						YDR092W	YOL132W	YOL132W		YDR158W	YDL130W-A	YDL130W-A		YDL217C	YIL083C			YDL130W-A	YCR083W	YCR083W
YER044C	YNL244C	YER044C		YNL336W	YHR140W	YHR140W		YOR265W	YOR293W	YOR265W		YGR271C-A	YCL058C	YCL058C						YGR142W	YDL177C	YDL177C		YPL094C	YPL239W	YPL239W		YJR095W	YOR331C			YJL225W-A	YDL065C	YDL065C
YDL009C	YIL086C	YDL009C		YDL115C	YPR132W	YPR132W		YNR032C-A	YMR311C	YNR032C-A		YHR049C-A	YNR024W	YNR024W						YJR047C	YMR158W	YMR158W		YBR201W	YDR469W	YDR469W		YCR025C	YDL191W			YIL177W-A	YBR230C	YBR230C
YOR258W	YER044C	YOR258W		YDR058C	YDR058C	YDR058C		YHR060W	YHR060W	YHR060W		YOR102W	YKR014C	YKR014C						YDR158W	YNL122C	YNL122C		YBR090C	YIL177W-A	YIL177W-A		YDR269C	YDR391C			YLR068W	YKL076C	YKL076C
YKR074W	YNL200C	YKR074W		YGR222W	YLR068W	YLR068W		YPL038W-A	YNL146C-A	YPL038W-A		YNL162W	YIL111W	YIL111W						YCR071C	YDR308C	YDR308C		YBR089C-A	YJL225W-A	YJL225W-A		YOR291W	YDL220C			YAR030C	YDR201W	YDR201W
YMR174C	YDL009C	YMR174C		YHR140W	YGR222W	YGR222W		YDL085C-A	YMR284W	YDL085C-A		YBR290W	YKL118W	YKL118W						YPL136W	YNL081C	YNL081C		YDL069C	YKR083C	YKR083C		YGR270C-A	YML101C			YOR082C	YCR020W-B	YCR020W-B
YDL153C	YOR258W	YDL153C		YER074W-A	YEL020W-A	YEL020W-A		YJR162C	YEL003W	YJR162C		YOR234C	YAR075W	YAR075W						YGL058W	YER104W	YER104W		YGR142W	YOL054W	YOL054W		YIL047C	YDR043C			YPL250C	YIR024C	YIR024C
YMR090W	YGR243W	YMR090W		YPR132W	YPR109W	YPR109W		YHR021C	YOL166C	YHR021C		YML098W	YGR236C	YGR236C						YOR216C	YKL076C	YKL076C		YGR018C	YOR282W	YOR282W		YNL202W	YKR007W			YDR253C	YBR089C-A	YBR089C-A
YHR121W	YKR074W	YHR121W		YIL103W	YML108W	YML108W		YEL003W	YOR265W	YEL003W		YIL111W	YOR234C	YOR234C						YDR253C	YLL047W	YLL047W		YGR236C	YGR275W	YGR275W		YFR032C	YDL005C			YBR230W-A	YDR469W	YDR469W
YDR034W-B	YMR174C	YDR034W-B		YLR342W-A	YDR336W	YDR336W		YDR544C	YNR032C-A	YDR544C		YKR014C	YDR473C	YDR473C						YCL059C	YBR201W	YBR201W		YPL239W	YGL108C	YGL108C		YHL012W	YNL244C			YLR275W	YLR181C	YLR181C
YPL123C	YCR097W	YPL123C		YNR020C	YGR271C-A	YGR271C-A		YHR001W-A	YDL085C-A	YHR001W-A		YGR236C	YBR258C	YBR258C						YLR438C-A	YDL130W-A	YDL130W-A		YKL013C	YDR201W	YDR201W		YJL225C	YNL096C			YKR083C	YDL068W	YDL068W
YIL156W-B	YMR090W	YIL156W-B		YPR012W	YLR107W	YLR107W		YDR320C-A	YOR015W	YDR320C-A		YBR258C	YBL036C	YBL036C						YGL029W	YFR046C	YFR046C		YGL158W	YCL058C	YCL058C		YMR056C	YHR204W			YPR131C	YFR001W	YFR001W
YFR052C-A	YDR034W-B	YFR052C-A		YPR109W	YBR004C	YBR004C		YOR015W	YHR021C	YOR015W		YNR024W	YOL108C	YOL108C						YDL005C	YPR143W	YPR143W		YBL108C-A	YHR050W-A	YHR050W-A		YGL218W	YKL138C-A			YCR083W	YBR162W-A	YBR162W-A
YCR097W	YIL156W-B	YCR097W		YDR336W	YGR064W	YGR064W		YJR011C	YHR001W-A	YJR011C		YDR473C	YER066C-A	YER066C-A						YOL132W	YAR002C-A	YAR002C-A		YDL130W-A	YKR040C	YKR040C		YDR344C	YNR008W			YBR269C	YMR194W	YMR194W
YIL111W	YPL033C	YIL111W		YLR107W	YLR456W	YLR456W		YNL146C-A	YDR320C-A	YNL146C-A		YOR020W-A	YOR020W-A	YOR020W-A						YDL177C	YPL239W	YPL239W		YOL054W	YPR143W	YPR143W		YKR039W	YMR054W			YMR003W	YNL136W	YNL136W
YDR379C-A	YHR121W	YDR379C-A		YML108W	YJR057W	YJR057W		YJL049W	YJR011C	YJL049W		YKL118W	YNL228W	YNL228W						YMR158W	YNL228W	YNL228W		YJL225W-A	YBR122C	YBR122C		YIL029W-A	YDL099W			YDL065C	YNL180C	YNL180C
YBR096W	YDL115C	YBR096W		YEL020W-A	YOR258W	YOR258W		YNL303W	YOR089C	YNL303W		YBL036C	YFL046W	YFL046W						YER104W	YHR060W	YHR060W		YIL177W-A	YFR046C	YFR046C		YIL039W	YHR166C			YAR075W	YBR200W-A	YBR200W-A
YDL115C	YDR281C	YDL115C		YJR057W	YPL139C	YPL139C		YLR290C	YKL041W	YLR290C		YFL046W	YOL164W-A	YOL164W-A						YNL122C	YPR131C	YPR131C		YOR282W	YOL108C	YOL108C		YLR342W-A	YOR109W			YBR230C	YPL250W-A	YPL250W-A
YDR281C	YIL111W	YDR281C		YBR004C	YML062C	YML062C		YOR089C	YNL303W	YOR089C		YCL058C	YLR388W	YLR388W						YNL285W	YLR022C	YLR022C		YDR469W	YOL014W	YOL014W		YLR416C	YER017C			YKL076C	YBR278W	YBR278W
YOL048C	YDR379C-A	YOL048C		YLR068W	YNL171C	YNL171C		YDR199W	YDR199W	YDR199W		YOL108C	YGR129W	YGR129W						YDR308C	YBR280C	YBR280C		YKR083C	YLR025W	YLR025W		Q0085	YPL089C			YCR020W-B	YLR395C	YLR395C
YLR390W-A	YCR020C-A	YLR390W-A		YLR456W	YBR047W	YBR047W		YKL041W	YJL049W	YKL041W		YLR388W	YFR036W-A	YFR036W-A						YNL081C	YDL217C	YDL217C		YGR275W	YOR198C	YOR198C		YJL219W	YDL047W			YDR201W	YBR201W	YBR201W
YIR039C	YPL123C	YIR039C		YGR271C-A	YNL070W	YNL070W		YDR034W-B	YER126C	YDR034W-B		YKL224C	YBL062W	YBL062W						YLL047W	Q0085	Q0085		YCL058C	YPL108W	YPL108W		YHR131W-A	YPL130W			YIR024C	YOR194C	YOR194C
YJR010C-A	YJR010C-A	YJR010C-A		YOR258W	YJL150W	YJL150W		YLR294C	YHR095W	YLR294C		YER066C-A	YMR077C	YMR077C						YBR201W	YHR213W	YHR213W		YGL108C	YBL107C	YBL107C		YLR365W	YKL034W			YBR089C-A	YMR077C	YMR077C
YLR262C	YLR346C	YLR262C		YGR064W	YEL014C	YEL014C		YLR080W	YDR034W-B	YLR080W		YGR129W	YIL002W-A	YIL002W-A						YFR046C	YBR117C	YBR117C		YDR201W	YLR181C	YLR181C		YNR067C	YHR076W			YDR469W	YGR215W	YGR215W
YMR256C	YBR096W	YMR256C		YNL171C	YMR035W	YMR035W		YDR357C	YKR074W	YDR357C		YFR036W-A	YFR003C	YFR003C						YKL076C	YIL059C	YIL059C		YPR143W	YIR017C	YIR017C		YMR214W	YGR051C			YMR194W	YOL052C-A	YOL052C-A
YGR183C	YLR390W-A	YGR183C		YML062C	YNL146W	YNL146W		YKR074W	YLR290C	YKR074W		YNL228W	YLR284C	YLR284C						YAR002C-A	YBL073W	YBL073W		YBR122C	YHL030W-A	YHL030W-A		Q0160	YNR023W			YFR001W	YNL215W	YNL215W
YCR020C-A	YFR052C-A	YCR020C-A		YPL139C	YIL086C	YIL086C		YCL056C	YKL118W	YCL056C		YMR077C	YLR395C	YLR395C						YPL239W	YOR328W	YOR328W		YKR040C	YNL228W	YNL228W		YGL262W	YPL109C			YLR181C	YMR039C	YMR039C
YMR040W	YMR256C	YMR040W		YIL086C	YLR361C-A	YLR361C-A		YLR423C	YLR294C	YLR423C		YLR395C	YKL067W	YKL067W						YPR143W	YLR390W-A	YLR390W-A		YFR046C	YNL081C	YNL081C		YLR235C	YIL072W			YNL136W	YJR023C	YJR023C
YDR196C	YLR262C	YDR196C		YMR090W	YDR320C-A	YDR320C-A		YOL166C	YCL056C	YOL166C		YFR003C	YDR513W	YDR513W						YNL228W	YKL220C	YKL220C		YOL108C	YMR039C	YMR039C		Q0275	YBL003C			YNL180C	YBL107C	YBL107C
YIL139C	YOL048C	YIL139C		YMR035W	YMR090W	YMR090W		YER126C	YNL338W	YER126C		YLR284C	YOR075W	YOR075W						YDL130W-A	YIL146C	YIL146C		YDR543C	YDL177C	YDL177C		YKR041W	YPR169W			YBR162W-A	YOL079W	YOL079W
YLR456W	YNR025C	YLR456W		YBR047W	YGR063C	YGR063C		YKL118W	YDR357C	YKL118W		YDR513W	YOR148C	YOR148C						YHR060W	YHR166C	YHR166C		YLR025W	YMR294W	YMR294W		Q0105	YOR062C			YDL068W	YOL097W-A	YOL097W-A
YPR046W	YGR183C	YPR046W		YNL070W	YPL271W	YPL271W		YKL067W	YOL164W-A	YKL067W		YKL067W	YLR012C	YLR012C						YPR131C	YNL204C	YNL204C		YPL108W	YDL002C	YDL002C		YJL156W-A	YOL154W			YBR278W	YCL058C	YCL058C
YLR346C	YIL139C	YLR346C		YNL115C	YNL115C	YNL115C		YDL130W-A	YLR080W	YDL130W-A		YBL062W	YDR381C-A	YDR381C-A						YLR022C	YNR041C	YNR041C		YHR050W-A	YGL174W	YGL174W		YLR466W	YBR184W			YLR395C	YOR282W	YOR282W
YBL018C	YLR042C	YBL018C		YDR320C-A	YKL001C	YKL001C		YGR243W	YLR423C	YGR243W		YIL002W-A	YHR050W-A	YHR050W-A						YMR279C	YIL117C	YIL117C		YOR198C	YIR024C	YIR024C		YIL160C	YNL171C			YBR201W	YDL177C	YDL177C
YPL033C	YMR040W	YPL033C		YLR361C-A	YJL004C	YJL004C		YGL103W	YDR008C	YGL103W		YOL164W-A	YMR174C	YMR174C						Q0250	Q0055	Q0055		YOL014W	YCR016W	YCR016W		YAR060C	YJL192C			YPL250W-A	YNL081C	YNL081C
YBR047W	YIR039C	YBR047W		YPL271W	YLR262C	YLR262C		YDR008C	YJL011C	YDR008C		YHR050W-A	YDR008C	YDR008C						YKL029C	YKL187C	YKL187C		YBL107C	YNL188W	YNL188W		YHR212C	YOR242C			YMR077C	YDR460W	YDR460W
YLR042C	YLR456W	YLR042C		YGR063C	YMR040W	YMR040W		YHL034W-A	YDR068W	YHL034W-A		YOR075W	YOL165C	YOL165C						YJR001W	YOR231W	YOR231W		YNL228W	YOL071W	YOL071W		YDL023C	YBR070C			YOR194C	YML026C	YML026C
YBR004C	YBR047W	YBR004C		YBR137W	YKL133C	YKL133C		YHR095W	YGL103W	YHR095W		YOR148C	YGR053C	YGR053C						YNR067C	YJR077C	YJR077C		YLR181C	YKL076C	YKL076C		YGL074C	YML003W			YGR215W	YLR102C	YLR102C
YNL115C	YPR046W	YNL115C		YKL001C	YBR137W	YBR137W		YDR068W	YDL130W-A	YDR068W		YMR174C	YNR020C	YNR020C						YLR234W	YML116W	YML116W		YHL030W-A	YPR131C	YPR131C		YER135C	YBL068W-A			YMR039C	YJR076C	YJR076C
YNR025C	YDR196C	YNR025C		YGL059W	YGL029W	YGL029W		YBR258C	YHL034W-A	YBR258C		YDR381C-A	YPR188C	YPR188C						YIL020C	YOR378W	YOR378W		YIR017C	YML026C	YML026C		Q0060	YBR241C			YOL079W	YPL185W	YPL185W
YCL067C	YBL018C	YCL067C		YJL004C	YKL136W	YKL136W		YJL011C	YGR243W	YJL011C		YDR008C	YIL139C	YIL139C						YMR173W-A	YMR214W	YMR214W		YNL081C	YBR269C	YBR269C		YLR415C	YFR013W			YBL107C	YBR122C	YBR122C
YCR039C	YBR004C	YCR039C		YLR262C	YGL059W	YGL059W		YGR034W	YKL067W	YGR034W		YGR053C	YBR111W-A	YBR111W-A						YHR204W	YMR238W	YMR238W		YMR039C	YBR089W	YBR089W		YLR307C-A	YGL129C			YJR023C	YKL117W	YKL117W
YOR143C	YCL067C	YOR143C		YMR040W	YDR374W-A	YDR374W-A		YHR010W	YBR258C	YHR010W		YBR111W-A	YLR171W	YLR171W						YDL094C	Q0115	Q0115		YDL177C	YBR173C	YBR173C		YDR384C	YLR149C			YNL215W	YJR156C	YJR156C
YIL027C	YCR039C	YIL027C		YKL133C	YDR272W	YDR272W		YKR083C	YHR010W	YKR083C		YPR188C	YNL133C	YNL133C						YLR173W	YHR042W	YHR042W		YMR294W	YOL079W	YOL079W		YOR169C	YLR306W			YOL052C-A	YHR050W-A	YHR050W-A
YIL020C-A	YOR143C	YIL020C-A		YDR272W	YDL212W	YDL212W		YNL122C	YGR034W	YNL122C		YLR171W	YLL037W	YLL037W						YGL063W	YFR018C	YFR018C		YDL002C	YIL138C	YIL138C		YDR360W	YKL147C			YOL097W-A	YKR040C	YKR040C
YDR320C-A	YNL044W	YDR320C-A		YDR374W-A	YCL038C	YCL038C		YDR342C	YDL158C	YDR342C		YIL139C	YDR051C	YDR051C						YLR058C	YBR295W	YBR295W		YCR016W	YGR204C-A	YGR204C-A		YJR086W	YFR031C-A			YCL058C	YKL041W	YKL041W
YER117W	YIL027C	YER117W		YLR010C	YLR010C	YLR010C		YOR020W-A	YNL122C	YOR020W-A		YNR020C	YPL038W-A	YPL038W-A						YCL026C-A	YLR126C	YLR126C		YIR024C	YDR486C	YDR486C		YOR378W	YOR266W			YDL177C	YKL123W	YKL123W
YMR035W	YNL115C	YMR035W		YEL014C	YJL142C	YJL142C		YDR248C	YKR083C	YDR248C		YJR067C	YJR067C	YJR067C						YJL172W	YLR214W	YLR214W		YGL174W	YHR081W	YHR081W		YNL203C	YLR131C			YOR282W	YML036W	YML036W
YIL103W	YIL020C-A	YIL103W		YNL146W	YIL156W-B	YIL156W-B		YJL199C	YPR187W	YJL199C		YOL165C	YPL146C	YPL146C						YNL235C	YOR306C	YOR306C		YNL188W	YGL005C	YGL005C		Q0115	YJL198W			YBR200W-A	YKL082C	YKL082C
YNL044W	YIL103W	YNL044W		YIL156W-B	YDL009C	YDL009C		YPR187W	YLL066W-B	YPR187W		YNL133C	YDR500C	YDR500C						YGR065C	YBR115C	YBR115C		YOL079W	YHR079C-A	YHR079C-A		YBR291C	YDL063C			YML026C	YLR388W	YLR388W
YEL012W	YDR139C	YEL012W		YKL136W	YBR096W	YBR096W		YKL061W	YDR342C	YKL061W		YMR251W-A	YDR034W-B	YDR034W-B						YGL028C	YKL107W	YKL107W		YKL076C	YOR281C	YOR281C		YKL107W	YBR113W			YNL081C	YIR017C	YIR017C
YPL052W	YDR320C-A	YPL052W		YDL212W	YIL139C	YIL139C		YMR304C-A	YKL061W	YMR304C-A		YDR034W-B	YMR251W-A	YMR251W-A						YGL255W	YDR455C	YDR455C		YOL071W	YJR050W	YJR050W		YCR081C-A	YBR110W			YDR460W	YPR126C	YPR126C
YER142C	YER117W	YER142C		YBR096W	YOL155W-A	YOL155W-A		YAR027W	YOR020W-A	YAR027W		YDR051C	YOL052C-A	YOL052C-A						YPL033C	YDL023C	YDL023C		YML026C	YML101C	YML101C		YIL155C	YNL086W			YJR076C	YJR037W	YJR037W
YPR166C	YNL093W	YPR166C		YCL038C	YGL159W	YGL159W		YOR312C	YMR304C-A	YOR312C		YML009W-B	YJR079W	YJR079W						YPL023C	Q0060	Q0060		YPR131C	YBR285W	YBR285W		YHL046C	YGL057C			YLR102C	YMR173W	YMR173W
YDR272W	YEL012W	YDR272W		YDL009C	YER037W	YER037W		YDL158C	YDR248C	YDL158C		YOL052C-A	YEL050W-A	YEL050W-A						YHR026W	YJL079C	YJL079C		YBR173C	YOR174W	YOR174W		YPL200W	YBR021W			YKL117W	YHR081W	YHR081W
YDR139C	YDL152W	YDR139C		YER037W	YOL086W-A	YOL086W-A		YDR379C-A	YJL199C	YDR379C-A		YDR500C	YFL013W-A	YFL013W-A						YGR045C	YKL178C	YKL178C		YBR269C	YDR308C	YDR308C		Q0075	YCR027C			YBR122C	YMR294W	YMR294W
YOL086W-A	YMR035W	YOL086W-A		YIL139C	YBL049W	YBL049W		YLR361C-A	YOR312C	YLR361C-A		YAR075W	YOL099C	YOL099C						YOR316C-A	YJR073C	YJR073C		YBR089W	YKL023W	YKL023W		YOR072W	YIL066W-A			YJR156C	YOL071W	YOL071W
YDR034C-A	YBR040W	YDR034C-A		YGL029W	YHR072W-A	YHR072W-A		YDL069C	YBL036C	YDL069C		YDR167W	YDR167W	YDR167W						YGL089C	YDL093W	YDL093W		YHR081W	YKL160W	YKL160W		YDR431W	YLR286C			YPL185W	YLR218C	YLR218C
YNL093W	YDR034C-A	YNL093W		YGL159W	YBR285W	YBR285W		YHL015W	YDL069C	YHL015W		YFL013W-A	YDR177W	YDR177W						YNL237W	YPL184C	YPL184C		YDR486C	YLR009W	YLR009W		YPR123C	YDR338C			YHR050W-A	YLR273C	YLR273C
YKL026C	YNL146W	YKL026C		YJL142C	YLR076C	YLR076C		YOL164W-A	YDR379C-A	YOL164W-A		YDR177W	YER002W	YER002W						YNR066C	YBR056C-B	YBR056C-B		YOR281C	YPR120C	YPR120C		YOR345C	YPR176C			YML036W	YMR294W-A	YMR294W-A
YDR319C	YPR166C	YDR319C		YBR285W	YPR094W	YPR094W		YBL036C	YDL153C	YBL036C		YPL146C	YMR294W	YMR294W						YJR020W	YLR154W-B	YLR154W-B		YIL138C	YDL041W	YDL041W		YGL235W	YDL018C			YKL082C	YPL094C	YPL094C
YLR251W	YDR272W	YLR251W		YBL049W	YBR022W	YBR022W		YMR077C	YAR027W	YMR077C		YMR294W	YDL099W	YDL099W						YER184C	YGL205W	YGL205W		YGL005C	YPR150W	YPR150W		YHR130C	YPR073C			YKL041W	YPR133C	YPR133C
YHR072W-A	YER142C	YHR072W-A		YOL086W-A	YOR277C	YOR277C		YER066C-A	YLR361C-A	YER066C-A		YLL037W	YDR532C	YDR532C						YBR235W	YDR256C	YDR256C		YHR079C-A	YJR115W	YJR115W		YER172C-A	YOL157C			YLR388W	YIL142C-A	YIL142C-A
YOL129W	YPL052W	YOL129W		YBR022W	YDL200C	YDL200C		YER037W	YNL228W	YER037W		YOL099C	YGL041C-B	YGL041C-B						YKL068W	YNL093W	YNL093W		YML101C	YGR025W	YGR025W		YOR391C	YHR150W			YKL123W	YOR174W	YOR174W
YNL336W	YHR072W-A	YNL336W		YLR076C	YNL222W	YNL222W		YKL065W-A	YHL015W	YKL065W-A		YKL065W-A	YHR095W	YHR095W						YPL139C	YPL223C	YPL223C		YJR050W	YNR025C	YNR025C		YBR134W	YBR125C			YKR040C	YDL002C	YDL002C
YLR043C	YMR141C	YLR043C		YNL222W	YBR062C	YBR062C		YLR062C	YLR062C	YLR062C		YDR532C	YLR421C	YLR421C						YOR392W	YBR144C	YBR144C		YOR174W	YMR158W-B	YMR158W-B		YDR003W-A	YOL093W			YPR126C	YPL064C	YPL064C
YDR336W	YOL086W-A	YDR336W		YPR094W	YHR049C-A	YHR049C-A		YBR062C	YMR077C	YBR062C		YEL050W-A	YKL065W-A	YKL065W-A						YCR081C-A	YCR025C	YCR025C		YGR204C-A	YOR115C	YOR115C		YDR455C	YEL070W			YIR017C	YOR234C	YOR234C
YMR141C	YKL026C	YMR141C		YHR072W-A	YER135C	YER135C		YCR003W	YER066C-A	YCR003W		YER002W	YOR394C-A	YOR394C-A						YAR060C	YPL201C	YPL201C		YDR308C	YKL117W	YKL117W		YAL037C-B	YKR003W			YHR081W	YEL032W	YEL032W
YDL152W	YBL036C	YDL152W		YDL200C	YDR302W	YDR302W		YCL035C	YLL065W	YCL035C		YDL099W	YLR456W	YLR456W						YHR212C	YPL134C	YPL134C		YKL023W	YOR331C	YOR331C		YBR178W	YCR107W			YJR037W	YDR215C	YDR215C
YBL036C	YDR319C	YBL036C		YOL129W	YHR032W-A	YHR032W-A		YGL230C	YBR062C	YGL230C		YOR289W	YDR253C	YDR253C						YJL160C	YBR222C	YBR222C		YBR285W	YDR460W	YDR460W		YLR462W	YOL107W			YMR294W	YLR400W	YLR400W
YDR032C	YPL119C-A	YDR032C		YPL123C	YMR065W	YMR065W		YLR287C-A	YER037W	YLR287C-A		YLR421C	YKL137W	YKL137W						YLL067W-A	YHR214W-A	YHR214W-A		YKL160W	YNL136W	YNL136W		YOR300W	YBL100C			YOL071W	YER152C	YER152C
YIR031C	YHR081W	YIR031C		YOR277C	YOL129W	YOL129W		YNL079C	YCR003W	YNL079C		YGL041C-B	YOR289W	YOR289W						YLL066W-A	Q0045	Q0045		YLR009W	YDR513W	YDR513W		YFL060C	YDR352W			YMR173W	YEL065W	YEL065W
YNL146W	YNL336W	YNL146W		YMR065W	YOR298W	YOR298W		YDL153C	YGL230C	YDL153C		YLR012C	YLR294C	YLR294C						YFL068W	YIL153W	YIL153W		YDL041W	YAL030W	YAL030W		YGL217C	YOR077W			YMR294W-A	YBR235W	YBR235W
YLR441C	YDR336W	YLR441C		YBR062C	YNL044W	YNL044W		YIL086C	YKL065W-A	YIL086C		YGL261C	YCL048W	YCL048W						YKL198C	YMR056C	YMR056C		YPR120C	YPL064C	YPL064C		YOR316C-A	YER115C			YPL094C	YER119C	YER119C
YHR081W	YLR251W	YHR081W		YDR302W	YIL060W	YIL060W		YCR075W-A	YLR287C-A	YCR075W-A		YLR456W	YOL166C	YOL166C						YMR095C	YLR213C	YLR213C		YNR025C	YGL058W	YGL058W		Q0182	YJL107C			YIL142C-A	YBR012C	YBR012C
YMR065W	YLR043C	YMR065W		YOR298W	YOR021C	YOR021C		YNL228W	YKL162C-A	YNL228W		YDR253C	YMR028W	YMR028W						YDR048C	YFL030W	YFL030W		YPR150W	YMR158W	YMR158W		YDR053W	YLR136C			YPR133C	YER099C	YER099C
YDR031W	YOL129W	YDR031W		YJL150W	YOR283W	YOR283W		YIL029C	YCR075W-A	YIL029C		YLR294C	YLR167W	YLR167W						YIL055C	YGL217C	YGL217C		YGR025W	YPL186C	YPL186C		YAL054C	YEL028W			YLR218C	YEL046C	YEL046C
YDR374W-A	YIR031C	YDR374W-A		YPL225W	YPL123C	YPL123C		YKL162C-A	YNL079C	YKL162C-A		YKL137W	YGR043C	YGR043C						YHL046W-A	YHR218W	YHR218W		YJR115W	YIL063C	YIL063C		YCR010C	YPR098C			YLR273C	YGR032W	YGR032W
YLR154W-B	YLR441C	YLR154W-B		YNL044W	YKL170W	YKL170W		YBR290W	YCL035C	YBR290W		YPL038W-A	YKL160W	YKL160W						YLR044C	YIL155C	YIL155C		YNL136W	YKL036C	YKL036C		YPR001W	YDR189W			YDL002C	YLR034C	YLR034C
YDR433W	YDR032C	YDR433W		YOR283W	YJL148W	YJL148W		YMR260C	YIL086C	YMR260C		YHR095W	YEL012W	YEL012W						YIL003W	YHL047C	YHL047C		YOR331C	YCL059C	YCL059C		YFL064C	YLR322W			YOR174W	YLR237W	YLR237W
YGL059W	YDR433W	YGL059W		YOR021C	YPL225W	YPL225W		YHR191C	YBR290W	YHR191C		YGR043C	YGL214W	YGL214W						YML042W	YPL119C	YPL119C		YKL117W	YDR014W-A	YDR014W-A		YDR157W	YML050W			YPL064C	YOR291W	YOR291W
YPL117C	YPL117C	YPL117C		YLR038C	YOR225W	YOR225W		YGR222W	YMR260C	YGR222W		YMR028W	YBR266C	YBR266C						YML031C-A	YKR097W	YKR097W		YDR460W	YER078W-A	YER078W-A		YOR139C	YMR278W			YOR234C	YPL200W	YPL200W
YBR022W	YJR157W	YBR022W		YOR052C	YPL117C	YPL117C		YMR321C	YIL029C	YMR321C		YLR167W	YDR079C-A	YDR079C-A						YMR322C	YOR291W	YOR291W		YOR115C	YLR041W	YLR041W		YOR105W	YGL013C			YER096W	YNL210W	YNL210W
YLR242C	YDR374W-A	YLR242C		YBL040C	YOR052C	YOR052C		YPR020W	YHR191C	YPR020W		YJR079W	YHR051W	YHR051W						YIR031C	YIL134C-A	YIL134C-A		YGL058W	YOR114W	YOR114W		YNL033W	YLR389C			YER044C	YHR213W	YHR213W
YPR134W	YLR154W-B	YPR134W		YPL117C	YLR038C	YLR038C		YLL066W-B	YMR321C	YLL066W-B		YHR051W	YOR036W	YOR036W						YDR526C	YIL012W	YIL012W		YPL064C	YER121W	YER121W		YER152W-A	YPL024W			YMR141W-A	Q0140	Q0140
YML001W	YGR169C-A	YML001W		YLR171W	YHR005C-A	YHR005C-A		YDR468C	YDR177W	YDR468C		YEL012W	YCR041W	YCR041W						YKL217W	YLR174W	YLR174W		YCL059C	YGR049W	YGR049W		YHR182C-A	YHR008C			YEL072W	YIL039W	YIL039W
YGR169C-A	YDR031W	YGR169C-A		YHR005C-A	YPL211W	YPL211W		YMR090W	YOR148C	YMR090W		YKL160W	YJL179W	YJL179W						YDL220C	YOR383C	YOR383C		YMR158W-B	YGR072W	YGR072W		YBR032W	YJL077C			YER081W	Q0110	Q0110
YNL090W	YMR065W	YNL090W		YKL170W	YBL040C	YBL040C		YOR148C	YIL002W-A	YOR148C		YDR079C-A	YLR145W	YLR145W						YIL014C-A	Q0075	Q0075		YAL030W	YFR049W	YFR049W		YOR329W-A	YPL177C			YJR147W	YHR131W-A	YHR131W-A
YIR032C	YPR134W	YIR032C		YLR104W	YBR056W-A	YBR056W-A		YDR177W	YDR468C	YDR177W		YOR036W	YDR316W	YDR316W						YKR045C	YGR139W	YGR139W		YDR513W	YOR041C	YOR041C		YFL067W	YIL041W			YPR116W	YPL246C	YPL246C
YDL137W	YGL059W	YDL137W		YIL060W	YLR171W	YLR171W		YNL338W	YFR010W-A	YNL338W		YGL214W	YKL172W	YKL172W						YDR263C	YER152C	YER152C		YMR158W	YCR071C	YCR071C		YOR055W	YER079W			YMR008C	YIL014C-A	YIL014C-A
YJR157W	YLR242C	YJR157W		YOR225W	YLR104W	YLR104W		YLL065W	YGR222W	YLL065W		YBR266C	YBR047W	YBR047W						YPR192W	YLR365W	YLR365W		YIL063C	YDR281C	YDR281C		YDR535C	YOR133W			YLR242C	YGL217C	YGL217C
YPL119C-A	YBR022W	YPL119C-A		YML001W	YLR042C	YLR042C		YBR056W	YNL110C	YBR056W		YCL048W	YOR094W	YOR094W						YMR317W	YKR039W	YKR039W		YKL036C	YHR071W	YHR071W		Q0065	YDL146W			YJL119C	YDR344C	YDR344C
YBR137W	YNR041C	YBR137W		YJL148W	YOR089C	YOR089C		YGL041W-A	YPR020W	YGL041W-A		YJL179W	YNL110C	YNL110C						YAR050W	YNR060W	YNR060W		YDR014W-A	YDR067C	YDR067C		YDR433W	YDR501W			YHL046W-A	YEL042W	YEL042W
YBL049W	YIR032C	YBL049W		YPL211W	YKR049C	YKR049C		YBL026W	YMR090W	YBL026W		YCR041W	YCL035C	YCL035C						YIL134W	YOL162W	YOL162W		YGR072W	YMR159C	YMR159C		YNL057W	YNL146W			YNL202W	YNL203C	YNL203C
YBR040W	YML001W	YBR040W		YHR049C-A	YML001W	YML001W		YFR010W-A	YGL041W-A	YFR010W-A		YDR316W	YPR187W	YPR187W						YJL135W	YIL047C	YIL047C		YPL186C	YNL206C	YNL206C		YAL047W-A	YBR196C			YML034C-A	YKR041W	YKR041W
YNR041C	YDL137W	YNR041C		YOL155W-A	YIR005W	YIR005W		YMR175W	YMR316C-A	YMR175W		YCL035C	YDR201W	YDR201W						YPL102C	YBR291C	YBR291C		YOR114W	YKL053W	YKL053W		YDR182W-A	YLR437C			YKL004W	YER009W	YER009W
YHR215W	YBL049W	YHR215W		YKR049C	YBR154C	YBR154C		YIL002W-A	YBL026W	YIL002W-A		YLR145W	YIL161W	YIL161W						YER172C-A	YNR071C	YNR071C		YDR281C	YPR133C	YPR133C		YLR331C	YIL110W			YMR007W	YOR345C	YOR345C
YHR139C	YPL038W-A	YHR139C		YMR284W	YIR018C-A	YIR018C-A		YPL186C	YPL170W	YPL186C		YOR094W	YNL114C	YNL114C						YBL015W	YJL219W	YJL219W		YLR041W	YOL132W	YOL132W		YHR165W-A	YDR475C			YPL111W	YMR088C	YMR088C
YPL142C	YHR007C-A	YPL142C		YOR089C	YMR284W	YMR284W		YPL170W	YBR056W	YPL170W		YMR256C	YDL158C	YDL158C						YEL042W	YBR220C	YBR220C		YGR049W	YAR002C-A	YAR002C-A		YHR069C-A	YJL096W			YDL047W	YDR360W	YDR360W
YER186C	YNL090W	YER186C		YIR005W	YBL036C	YBL036C		YBR230W-A	YBR230W-A	YBR230W-A		YBR047W	YMR256C	YMR256C						YNR017W	YPR014C	YPR014C		YOR041C	YAL003W	YAL003W		YDL034W	YMR194C-A			YHR029C	YNR075W	YNR075W
YHR007C-A	YHR095W	YHR007C-A		YLR042C	YAL059W	YAL059W		YNL110C	YNL070W	YNL110C		YIL161W	YLR262C	YLR262C						YBL042C	YMR031W-A	YMR031W-A		YCR071C	YOR194C	YOR194C		YNL205C	YPL197C			YLR365W	YDL210W	YDL210W
YER071C	YEL014C	YER071C		YBR154C	YOR143C	YOR143C		YMR316C-A	YPL186C	YMR316C-A		YPR187W	YKL061W	YKL061W						YGR046W	YNL202W	YNL202W		YHR071W	YDR116C	YDR116C		YJL195C	YLR456W			YER089C	YGL218W	YGL218W
YHR095W	YNL303W	YHR095W		YBL036C	YMR141C	YMR141C		YNL070W	YMR175W	YNL070W		YDR201W	YMR150C	YMR150C						YDR431W	YNL019C	YNL019C		YFR049W	YPL013C	YPL013C		YPL119C-A	YER151C			YOR387C	YBR004C	YBR004C
YNL009W	YHR139C	YNL009W		YNL162W-A	YNL162W-A	YNL162W-A		YJL166W	YPR059C	YJL166W		YOL166C	YPR200C	YPR200C						YGR242W	YOR169C	YOR169C		YER121W	YDR383C	YDR383C		YHR032W-A	YNL304W			YCR048W	YLR134W	YLR134W
YKL006C-A	YHR215W	YKL006C-A		YDR248C	YBR024W	YBR024W		YIR005W	YDR002W	YIR005W		YOR394C-A	YDR357C	YDR357C						YHL040C	YJL045W	YJL045W		YDR067C	YKL172W	YKL172W		YGR139W	YGL198W			YDR242W	YAR060C	YAR060C
YNL303W	YER186C	YNL303W		YAR027W	YDR248C	YDR248C		YER117W	YIR005W	YER117W		YMR150C	YOR182C	YOR182C						YDR216W	Q0105	Q0105		YMR159C	YMR197C	YMR197C		YIL105W-A	YNR042W			YLR142W	YHR212C	YHR212C
YJR057W	YLR285C-A	YJR057W		YBR024W	YAR027W	YAR027W		YHR051W	YLR154W-F	YHR051W		YKL061W	YLR043C	YLR043C						YOR072W	YOR389W	YOR389W		YKL053W	YJR112W	YJR112W		YDL163W	YOR064C			YLR390W-A	YPR202W	YPR202W
YLR046C	YBR137W	YLR046C		YOR143C	YDL050C	YDL050C		YHR087W	YER002W	YHR087W		YLR262C	YOR199W	YOR199W						YOR055W	YIL108W	YIL108W		YOL132W	YDR008C	YDR008C		YOR108C-A				YBR063C	YNL019C	YNL019C
YHR141C	YLR164W	YHR141C		YNL200C	YGR075C	YGR075C		YFR003C	YJL166W	YFR003C		YKL172W	YHR141C	YHR141C						YGL234W	YIL039W	YIL039W		YPR133C	YHR018C	YHR018C		YCL068C				YEL063C	YKR045C	YKR045C
YEL014C	YLR046C	YEL014C		YBR056W-A	YLR285C-A	YLR285C-A		YPL142C	YBL062W	YPL142C		YNL110C	YBR147W	YBR147W						YPR128C	YKL163W	YKL163W		YNL206C	YKL082C	YKL082C		YGR122C-A				YNR041C	YGL235W	YGL235W
YBR166C	YER158W-A	YBR166C		YHR032W-A	YPL002C	YPL002C		YOR210W	YOR210W	YOR210W		YDL158C	YIL020C-A	YIL020C-A						YGL262W	Q0065	Q0065		YOR194C	YGR253C	YGR253C		YLR280C				YAL044W-A	YDL217C	YDL217C
YLR164W	YPL142C	YLR164W		YMR141C	YDR051C	YDR051C		YGR053C	YER117W	YGR053C		YPR200C	YLR025W	YLR025W						YJL091C	YDR384C	YDR384C		YAL003W	YPR148C	YPR148C		YNL319W				YEL020C-B	YIL047C	YIL047C
YER158W-A	YKL006C-A	YER158W-A		YAL059W	YDR167W	YDR167W		YER142C	YLR279W	YER142C		YLR043C	YMR263W	YMR263W						YLR232W	YLR142W	YLR142W		YAR002C-A	YMR028W	YMR028W		YML009W-B				YKL163W	YLR415C	YLR415C
YDR447C	YNL009W	YDR447C		YPL002C	YEL020C-B	YEL020C-B		YGL231C	YGL231C	YGL231C		YDR357C	YML055W	YML055W						YHR177W	YOR348C	YOR348C		YPL013C	YPL170W	YPL170W		YDR464C-A				YMR194C-A	YLL012W	YLL012W
YLR264W	YER071C	YLR264W		YGR075C	YNL200C	YNL200C		YER133W	YER133W	YER133W		YBR147W	YPR100W	YPR100W						YKL046C	YBR296C	YBR296C		YKL172W	YJR156C	YJR156C		YIR021W-A				YEL020C	YKL219W	YKL219W
YLR285C-A	YOL160W	YLR285C-A		YER135C	YER050C	YER050C		YDR002W	YPL142C	YDR002W		YHR141C	YGR209C	YGR209C						YLR034C	YOR084W	YOR084W		YDR116C	YJR118C	YJR118C		YOR161C-C				YPR016W-A	YPR054W	YPR054W
YOR298W	YHR141C	YOR298W		YDR051C	YER071C	YER071C		YHR121W	YOL108C	YHR121W		YOR182C	YCR003W	YCR003W						YGL146C	YGL235W	YGL235W		YDR008C	YLR395C	YLR395C		YOR161W-B				YOR298W	Q0250	Q0250
YLR227C	YLR264W	YLR227C		YDR167W	YIR032C	YIR032C		YLR154W-F	YFR003C	YLR154W-F		YNL114C	YLR438C-A	YLR438C-A						YDR360W	YNL203C	YNL203C		YDR383C	YDL065C	YDL065C		YER085C				YER083C	YPL058C	YPL058C
YGL085W	YDL160C-A	YGL085W		YER071C	YER133W	YER133W		YML030W	YGR053C	YML030W		YGR209C	YDR461C-A	YDR461C-A						YER113C	Q0275	Q0275		YMR197C	YLR449W	YLR449W		YHR032C-A				YOR378W	YER113C	YER113C
YDR079W	YOR298W	YDR079W		YDL050C	YJR141W	YJR141W		YOL108C	YML055W	YOL108C		YMR263W	YDR034C-A	YDR034C-A						YIL023C	YLR307C-A	YLR307C-A		YJR112W	YPL238C	YPL238C		YER023C-A				YMR187C	YIR032C	YIR032C
YNL147W	YLR460C	YNL147W		YKL026C	YBR058C-A	YBR058C-A		YBL062W	YER142C	YBL062W		YIL020C-A	YGR280C	YGR280C						YBL075C	YGR032W	YGR032W		YKL082C	YPL107W	YPL107W		YIR040C				YLR416C	YER017C	YER017C
YOL160W	YDR079W	YOL160W		YEL020C-B	YKL026C	YKL026C		YPR098C	YOR186C-A	YPR098C		YLR025W	YDR373W	YDR373W						YOR388C	YMR119W-A	YMR119W-A		YER078W-A	YPR102C	YPR102C		YPR076W				YMR208W	YLR046C	YLR046C
YDR302W	YJR057W	YDR302W		YER133W	YBR302C	YBR302C		YML055W	YHR051W	YML055W		YPR100W	YFR033C	YFR033C						YER153C	YBR208C	YBR208C		YHR018C	YHR166C	YHR166C		YER014C-A				YNL108C	YOR055W	YOR055W
YDL160C-A	YBR166C	YDL160C-A		YER050C	YML132W	YML132W		YPR094W	YHR121W	YPR094W		YML055W	YNL013C	YNL013C						YGL257C	YNL117W	YNL117W		YGR253C	YKL219W	YKL219W		YDR442W				YER144C	YLR342W-A	YLR342W-A
YKL162C-A	YGL085W	YKL162C-A		YPR204W	YPR166C	YPR166C		YLR279W	YML030W	YLR279W		YCR003W	YAR053W	YAR053W						YDL217C	YOR192C-C	YOR192C-C		YMR028W	YPL272C	YPL272C		YPR160C-A				YFL064C	YEL040W	YEL040W
YLR460C	YDR447C	YLR460C		YIR032C	YNL038W	YNL038W		YCR082W	YHR087W	YCR082W		YDR373W	YNL122C	YNL122C						Q0085	YDR157W	YDR157W		YPR148C	YDR191W	YDR191W		YHR056W-A				YLR400W	Q0050	Q0050
YJL004C	YDR302W	YJL004C		YJR141W	YPR204W	YPR204W		YPR188C	YCR082W	YPR188C		YDR461C-A	YPR002C-A	YPR002C-A						YBR280C	YMR303C	YMR303C		YPL170W	YIL153W	YIL153W		YEL075W-A				YDR215C	YDR431W	YDR431W
YGR222W	YLR227C	YGR222W		YBR302C	YJL199C	YJL199C		YGL220W	YOL165C	YGL220W		YLR438C-A	YJR085C	YJR085C						YIL059C	YDL034W	YDL034W		YPL238C	YMR141W-A	YMR141W-A		YFL034C-A				YPL200W	YER184C	YER184C
YPL038W-A	YKL162C-A	YPL038W-A		YML132W	YNL214W	YNL214W		YOL086W-A	YPR188C	YOL086W-A		YOR199W	YIL014C-A	YIL014C-A						YNL034W	YNL014W	YNL014W		YLR449W	YOL020W	YOL020W						YEL032W	YJL015C	YJL015C
YNL015W	YNL147W	YNL015W		YNL214W	YMR151W	YMR151W		YER002W	YPR094W	YER002W		YFR033C	YBL059C-A	YBL059C-A						YHR213W	YGL156W	YGL156W		YJR118C	YKL004W	YKL004W						YEL065W	YJL153C	YJL153C
YER037W	YPR012W	YER037W		YLR285C-A	YNL286W	YNL286W		YCL033C	YCR041W	YCL033C		YDR034C-A	YNL150W	YNL150W						YBL073W	YHR139C	YHR139C		YDL065C	YNR066C	YNR066C						YBR012C	YDR384C	YDR384C
YLR008C	YJL004C	YLR008C		YBR058C-A	YPR098C	YPR098C		YML024W	YDR167W	YML024W		YCL076W	YDR016C	YDR016C						YOR328W	YNL205C	YNL205C		YLR395C	YNR060W	YNR060W						YBR235W	YLL055W	YLL055W
YLR166C	YGR222W	YLR166C		YPR098C	YOR357C	YOR357C		YDR167W	YGL220W	YDR167W		YNL013C	YKL138C-A	YKL138C-A						YDR455C	YER065C	YER065C		YJR156C	YNL219C	YNL219C						YER152C	YBR220C	YBR220C
YJL031C	YGR271C-A	YJL031C		YJL199C	YBR111W-A	YBR111W-A		YPR059C	YPL146C	YPR059C		YNL122C	YIR005W	YIR005W						YKL220C	YDL085W	YDL085W		YPL107W	YNL044W	YNL044W						YHR131W-A	YPR128C	YPR128C
YMR157C	YNL223W	YMR157C		YPR166C	YBL018C	YBL018C		YNL147W	YOR094W	YNL147W		YGR280C	YGL121C	YGL121C						YLR390W-A	YNL033W	YNL033W		YPR102C	YKR042W	YKR042W						YER175W-A	YNL142W	YNL142W
YLR038C	YER037W	YLR038C		YNL038W	YDL137W	YDL137W		YCR041W	YPR098C	YCR041W		YIL014C-A	YLR151C	YLR151C						YIL146C	YPL187W	YPL187W		YGR014W	YBL073W	YBL073W						YLR466W	YBR291C	YBR291C
YMR284W	YDR492W	YMR284W		YMR151W	YGR082W	YGR082W		YOR258W	YGR105W	YOR258W		YAR053W	YAL025C	YAL025C						YNR041C	YLR342W-A	YLR342W-A		YDR216W	YBR235W	YBR235W						YER119C	YMR244W	YMR244W
YPL223C	YJL150W	YPL223C		YOR357C	YMR094W	YMR094W		YLR327C	YML024W	YLR327C		YJR085C	YIL029C	YIL029C						YNL204C	YPL119C-A	YPL119C-A		YML056C	YER060W	YER060W						YER099C	YJR073C	YJR073C
YNL223W	YNL015W	YNL223W		YDL137W	YNL117W	YNL117W		YPL013C	YOL086W-A	YPL013C		YGL121C	YML009C-A	YML009C-A						YHR166C	YKR032W	YKR032W		YML078W	YOR153W	YOR153W						YEL046C	YHL012W	YHL012W
YKR017C	YLR008C	YKR017C		YBL018C	YMR183C	YMR183C		YOR094W	YNL235C	YOR094W		YDR016C	YLR261C	YLR261C						YBR117C	YPR054W	YPR054W		YJR001W	YJL172W	YJL172W						YNL210W	YCL026C-A	YCL026C-A
YBR093C	YGL029W	YBR093C		YNL286W	YAL016C-A	YAL016C-A		YDR471W	YDR471W	YDR471W		YIL029C	YHR087W	YHR087W						YIL117C	YFR032C	YFR032C		YHR026W	YJL158C	YJL158C						YLR034C	YDR053W	YDR053W
YGR271C-A	Q0160	YGR271C-A		YIR018C-A	YLR058C	YLR058C		YGR105W	YPL013C	YGR105W		YNL150W	YGL041W-A	YGL041W-A						Q0055	Q0160	Q0160		YNL066W	YDR263C	YDR263C						YHR213W	YEL053W-A	YEL053W-A
YBR026C	YLR068W	YBR026C		YBR111W-A	YIL057C	YIL057C		YML026C	YML026C	YML026C		YBL059C-A	YIL063C	YIL063C						YOR231W	YIL160C	YIL160C		YDR242W	Q0110	Q0110						YGR032W	YJL169W	YJL169W
YLR107W	YJL031C	YLR107W		YNL198C	YJR129C	YJR129C		YLR406C	YOR258W	YLR406C		YKL138C-A	YBR233W-A	YBR233W-A						YJR077C	YLR377C	YLR377C		YGR172C	YLR232W	YLR232W						YFL060C	YJL171C	YJL171C
YKR068C	YBR093C	YKR068C		YBR146W	YEL059W	YEL059W		YKL068W-A	YCL033C	YKL068W-A		YLR151C	YLR200W	YLR200W						YKL187C	YDR269C	YDR269C		YMR214W	YBR115C	YBR115C						Q0140	YPL119C-A	YPL119C-A
YDR191W	YLR166C	YDR191W		YLR353W	YJL127W-A	YJL127W-A		YER050C	YNL147W	YER050C		YIR005W	YMR158W-B	YMR158W-B						YMR214W	YIL123W	YIL123W		YER033C	YAL054C	YAL054C						YOR291W	YBR208C	YBR208C
YDR051C	YKR017C	YDR051C		YMR106C	YLR154W-E	YLR154W-E		YOR036W	YLR327C	YOR036W		YPR002C-A	YNR032C-A	YNR032C-A						YML116W	YMR086C-A	YMR086C-A		YDL037C	YNL204C	YNL204C						YOR345C	YOR300W	YOR300W
YPR012W	YPL223C	YPR012W		YOR314W	Q0070	Q0070		YDR529C	YKL068W-A	YDR529C		YLR261C	YPR099C	YPR099C						YOR378W	YMR194C-A	YMR194C-A		YOR293C-A	YHR039C	YHR039C						YIL039W	YBR134W	YBR134W
YGR232W	YLR038C	YGR232W		YGR146C	YGL153W	YGL153W		YPL146C	YER050C	YPL146C		YHR087W	YDL050C	YDL050C						YMR238W	YIR018C-A	YIR018C-A		YLR008C	YDL016C	YDL016C						YLR237W	Q0055	Q0055
YDR492W	YDR051C	YDR492W		YDL182W	YNL191W	YNL191W		YDR079C-A	YOR021C	YDR079C-A		YGL041W-A	YFR004W	YFR004W						Q0115	YHR032W-A	YHR032W-A		YDR360W	YLR134W	YLR134W						YPL246C	YHR126C	YHR126C
YDR467C	YDR191W	YDR467C		YMR166C	YKR001C	YKR001C		YDR447C	YKL082C	YDR447C		YML009C-A	YMR294W-A	YMR294W-A						YHR042W	YAL065C	YAL065C		YPL246C	YER148W	YER148W						YIL014C-A	YOR170W	YOR170W
Q0160	YKR068C	Q0160		YGL216W	YMR198W	YMR198W		YGL080W	YLR406C	YGL080W		YMR158W-B	YKR035C	YKR035C						YLR126C	YCR010C	YCR010C		YJR147W	YBR093C	YBR093C						Q0110	YER152W-A	YER152W-A
YGL159W	YMR284W	YGL159W		YLR390W	YPL233W	YPL233W		YOR021C	YOR036W	YOR021C		YIL063C	YOR159C	YOR159C						YBR056C-B	YJL175W	YJL175W		YBR046C	YEL040W	YEL040W						YGL217C	Q0255	Q0255
YGL029W	YMR157C	YGL029W		YLR450W	YBL074C	YBL074C		YNL235C	YGR035C	YNL235C		YNR032C-A	YKL196C	YKL196C						YFR018C	YEL075W-A	YEL075W-A		YLL056C	YLR046C	YLR046C						YKR041W	YKR039W	YKR039W
YKR039W	YOR392W	YKR039W		YGR259C	YLR236C	YLR236C		YJL031C	YDR079C-A	YJL031C		YPR099C	YPL280W	YPL280W						YBR295W	YPR001W	YPR001W		YGR046W	YLR120C	YLR120C						YNL203C	Q0105	Q0105
YJL143W	YLR107W	YJL143W		YBR130C	YJL019W	YJL019W		YGR106C	YBR268W	YGR106C		YAL025C	YOR006C	YOR006C						YJL015C	YJL156W-A	YJL156W-A		YMR230W-A	YIR031C	YIR031C						YNR075W	YBR178W	YBR178W
YLR068W	YBR026C	YLR068W		YPL253C	YHR212W-A	YHR212W-A		YBR268W	YKL018C-A	YBR268W		YBR233W-A	YBL077W	YBL077W						YJR086W	YAL054C	YAL054C		YOL011W	YLR400W	YLR400W						YMR088C	YOR072W	YOR072W
YIL113W	YBR046C	YIL113W		YNL058C	YNL328C	YNL328C		YOL165C	YGL080W	YOL165C		YKR035C	YDL172C	YDL172C						YOR306C	YIL165C	YIL165C		YKL046C	YIL160C	YIL160C						YDL210W	Q0045	Q0045
YML054C	YKR039W	YML054C		YDL040C	YPR096C	YPR096C		YKL018C-A	YDR447C	YKL018C-A		YLR200W	YOR193W	YOR193W						YBR115C	YPL062W	YPL062W		YER044C	YNL090W	YNL090W						YGL235W	YFL067W	YFL067W
YKL133C	YGR232W	YKL133C		YJL127C	YJL182C	YJL182C		YOR357C	YJL031C	YOR357C		YFR004W	YAL055W	YAL055W						YLR214W	YBR134W	YBR134W		YNR055C	YNR075W	YNR075W						YDR360W	YLR331C	YLR331C
YLR400W	YBR222C	YLR400W		YNL072W	YNR067C	YNR067C		YGL031C	YDR529C	YGL031C		YKL196C	YJR082C	YJR082C						Q0060	YPL036W	YPL036W		YBR019C	YJL127C-B	YJL127C-B						YHR212C	YDR003W-A	YDR003W-A
YPL002C	YGL159W	YPL002C		YFR046C	YJL043W	YJL043W		YOR193W	YGR106C	YOR193W		YOR193W	YJL031C	YJL031C						YKL178C	YJL195C	YJL195C		YGR055W	YPR116W	YPR116W						YAR060C	YER172C-A	YER172C-A
YNL100W	YDR467C	YNL100W		YLR210W	YDR113C	YDR113C		YGL030W	YBL108C-A	YGL030W		YDL050C	YFL014W	YFL014W						YBR144C	YJR095W	YJR095W		YMR300C	YBR219C	YBR219C						YEL042W	YJL156W-A	YJL156W-A
YBR046C	YLR400W	YBR046C		YHR028W-A	YDR019C	YDR019C		YIL098C	YIL098C	YIL098C		YOR006C	YCR082W	YCR082W						YJL079C	YHR126C	YHR126C		YDL047W	YER099C	YER099C						YER009W	YEL075C	YEL075C
YER007W	YPL130W	YER007W		YOR331C	YGL028C	YGL028C		YBL090W	YGL031C	YBL090W		YFL014W	YML026C	YML026C						YKL107W	YHR069C-A	YHR069C-A		YDR442W	YHL047C	YHL047C						YGL218W	Q0060	Q0060
YHR005C-A	YJL143W	YHR005C-A		YAL045C	YDR246W-A	YDR246W-A		YBR302C	YEL020W-A	YBR302C		YMR294W-A	YER053C-A	YER053C-A						YDL023C	YGR294W	YGR294W		YHL018W	YMR187C	YMR187C						YDR344C	YEL073C	YEL073C
YBR222C	YBL094C	YBR222C		YKL127W	YBR098W	YBR098W		YML132W	YOR357C	YML132W		YOR159C	YCR098C	YCR098C						YPL184C	YDR433W	YDR433W		YGR065C	YHR213W	YHR213W						YJR086W	YDR433W	YDR433W
YBR210W	YER148W	YBR210W		YAL003W	YOR035C	YOR035C		YKL082C	YBR302C	YKL082C		YBL077W	YGR135W	YGR135W						YNL093W	YHR125W	YHR125W		YML031C-A	YDL210W	YDL210W						YBR004C	YOR139C	YOR139C
YBL094C	YKL133C	YBL094C		YPL032C	YNR050C	YNR050C		YDR133C	YML132W	YDR133C		YCR098C	YGR222W	YGR222W						YDL093W	YFL067W	YFL067W		YNL117W	YCR025C	YCR025C						YLR134W	YOR329W-A	YOR329W-A
YER148W	YER007W	YER148W		YCL063W	YLR377C	YLR377C		YPR134W	YBL090W	YPR134W		YCL073C	YJR057W	YJR057W						YHL049C	YKR073C	YKR073C		YGR227W	YJL160C	YJL160C						YNL019C	YDR455C	YDR455C
YFL030W	YML054C	YFL030W		YDR014W-A	YDL117W	YDL117W		YDR288W	YPR134W	YDR288W		YJL031C	YDR002W	YDR002W						YGL205W	YOR329W-A	YOR329W-A		YPL023C	YHR216W	YHR216W						YPR202W	YPR123C	YPR123C
YCR041W	YPL002C	YCR041W		YLR286C	YDR213W	YDR213W		YEL020W-A	YOR193W	YEL020W-A		YMR321C	YLR435W	YLR435W						YLR154W-B	YOR139C	YOR139C		YBR117C	YMR088C	YMR088C						YKR045C	YDR182W-A	YDR182W-A
YAR027W	YER188W	YAR027W		YBR038W	YMR001C	YMR001C		YGR035C	YGL030W	YGR035C		YAL055W	YKR074W	YKR074W						YJR073C	YPR123C	YPR123C		YKL178C	YLL051C	YLL051C						YDL217C	YJL079C	YJL079C
YDL200C	YIL008W	YDL200C		YGR204W	YAR035W	YAR035W		YDL065C	YDR288W	YDL065C		YDL172C	YLR211C	YLR211C						YDR256C	YPL200W	YPL200W		YGR038W	YJR077C	YJR077C						YLR415C	Q0085	Q0085
YER188W	YIL113W	YER188W		YFL039C	YFL059W	YFL059W		YKR085C	YDR133C	YKR085C		YCR082W	YPR098C	YPR098C						YCR025C	YHR131W-A	YHR131W-A		YGL257C	YOR348C	YOR348C						YJL222W-B	YJR079W	YJR079W
YPR176C	YCR041W	YPR176C		YDR226W	YDR507C	YDR507C		YKR014C	YFL063W	YKR014C		YJR082C	YOR369C	YOR369C						YHR214W-A	YER152W-A	YER152W-A		YNL024C	YGR242W	YGR242W						YIL047C	YHR130C	YHR130C
YGR088W	YNL100W	YGR088W		YIL150C	YGR140W	YGR140W		YDR058C	YOL014W	YDR058C		YPL280W	YBR062C	YBR062C						YPL223C	YML133C	YML133C		YLR031W	YDR003W-A	YDR003W-A						YOR391C	YNL033W	YNL033W
YPL130W	YFL030W	YPL130W		YEL019C	YJL120W	YJL120W		YKL058W	YDL065C	YKL058W		YGR222W	YMR260C	YMR260C						YJL222W	YPR076W	YPR076W		YER043C	YDR537C	YDR537C						YLL012W	YBR032W	YBR032W
YHL012W	YHR005C-A	YHL012W		YMR190C	YPR125W	YPR125W		YGR064W	YCR102C	YGR064W		YGR135W	YBL090W	YBL090W						YIL012W	YJL119C	YJL119C		YEL063C	YKR045C	YKR045C						YKL219W	YOR105W	YOR105W
YLR367W	YBR210W	YLR367W		YGR082W	YPR108W-A	YPR108W-A		YDR051C	YKR085C	YDR051C		YML026C	YLR251W	YLR251W						YPL201C	YER014C-A	YER014C-A		YOR049C	YEL064C	YEL064C						YPR054W	YNL057W	YNL057W
YOR392W	YHL012W	YOR392W		YPL158C	YLR122C	YLR122C		YOL048C	YKR014C	YOL048C		YJR057W	YAR008W	YAR008W						YPL134C	YPR160C-A	YPR160C-A		YER076C	YFL030W	YFL030W						YPL058C	YER135C	YER135C
YDR030C	YDL200C	YDR030C		YJL127W-A	YOR146W	YOR146W		YDR328C	YDR051C	YDR328C		YLR211C	YDR469W	YDR469W						YGL217C	YLR462W	YLR462W		YKL078W	YDR410C	YDR410C						Q0250	YAL047W-A	YAL047W-A
YIR005W	YNR024W	YIR005W		YLR234W	YLR334C	YLR334C		YLR171W	YGR064W	YLR171W		YER053C-A	YGR064W	YGR064W						Q0045	YGR270C-A	YGR270C-A		YNL240C	YCL038C	YCL038C						YER113C	Q0115	Q0115
YIL008W	YFL019C	YIL008W		YMR094W	YDL240W	YDL240W		YDR532C	YDL160C-A	YDR532C		YPR098C	YDR383C	YDR383C						YBR222C	YHR054C	YHR054C		YEL072W	YNL192W	YNL192W						YIR032C	Q0160	Q0160
YGL220W	YLR367W	YGL220W		YMR183C	YPR145W	YPR145W		YPR102C	YOR268C	YPR102C		YKR074W	YKR040C	YKR040C						YLR213C	YHR182C-A	YHR182C-A		YML066C	YER060W-A	YER060W-A						YJL015C	YOR169C	YOR169C
YIL014W	YIL014W	YIL014W		YNL117W	YCL023C	YCL023C		YMR230W	YDR328C	YMR230W		YLR251W	YDL115C	YDL115C						YIL153W	YLR331C	YLR331C		YMR101C	YBL015W	YBL015W						YER017C	Q0075	Q0075
YHR012W	YOL159C	YHR012W		YEL059W	YEL076C	YEL076C		YOL014W	YDR532C	YOL014W		YBR062C	YPL185W	YPL185W						YMR056C	YHR056W-A	YHR056W-A		YMR035W	YHL046W-A	YHL046W-A						YLR342W-A	Q0275	Q0275
YJL055W	YAR027W	YJL055W		YAL016C-A	YBL071W-A	YBL071W-A		YDL160C-A	YKL058W	YDL160C-A		YOR369C	YAL026C-A	YAL026C-A						YHR218W	YML009W-B	YML009W-B		YDR431W	YDL093W	YDL093W						YOR055W	YJL195C	YJL195C
YOR257W	YBR056W-A	YOR257W		YLR058C	YNR009W	YNR009W		YLR421C	YDR058C	YLR421C		YBL090W	YLR297W	YLR297W						YIL155C	YDL247W	YDL247W		YDR345C	YER190W	YER190W						YLR046C	YHR182C-A	YHR182C-A
YOL159C	YOR257W	YOL159C		YHR212W-A	YER104W	YER104W		YMR263W	YPR102C	YMR263W		YDR002W	YPR102C	YPR102C						YFL030W	YLR062C	YLR062C		YER083C	YDR492W	YDR492W						YDR053W	YLR222C-A	YLR222C-A
YFL019C	YPR176C	YFL019C		YJR129C	YCR095W-A	YCR095W-A		YOR075W	YLR171W	YOR075W		YAR008W	YMR090W	YMR090W						YPL119C	YLR061W	YLR061W		YKL220C	YBR004C	YBR004C						YDR431W	YDR464C-A	YDR464C-A
YJL166W	YIR005W	YJL166W		YIL057C	YNL120C	YNL120C		YCR102C	YML009C-A	YCR102C		YMR260C	YPL271W	YPL271W						YKR097W	YDR545C-A	YDR545C-A		YHR123W	YHL016C	YHL016C						YEL040W	YOR161C-C	YOR161C-C
YNR024W	YDR030C	YNR024W		Q0070	YBR124W	YBR124W		YOR257W	YOR257W	YOR257W		YDR383C	YJL166W	YJL166W						YIL134C-A	YHR193C-A			YOR231W	YER144C	YER144C						YER184C	Q0080	Q0080
YCR090C	YGL220W	YCR090C		YLR154W-E	YDL062W	YDL062W		YML009C-A	YLR421C	YML009C-A		YGR064W	YGL080W	YGL080W						YOR291W	YAL069W			YCR045C	YER070W	YER070W						Q0050	Q0182	Q0182
YMR188C	YPR087W	YMR188C		YLR236C	YFR036W	YFR036W		YCR024C-B	YOL048C	YCR024C-B		YLR435W	YKR085C	YKR085C						YOL162W	YHR018C			YGL008C	YER091C	YER091C						YDR384C	YDR442W	YDR442W
YNR055C	YNR055C	YNR055C		YKR001C	YEL009C-A	YEL009C-A		YDR378C	YMR263W	YDR378C		YDR469W	YBR056W	YBR056W						YHL047C	YCR003W			YIR030W-A	YEL046C	YEL046C						YLL055W	YHR032W-A	YHR032W-A
YPR087W	YJL055W	YPR087W		YPR096C	YJL107C	YJL107C		YAR030C	YOR075W	YAR030C		YMR090W	YDL007W	YDL007W						YLR365W	YLR009W			YMR173W-A	YPL111W	YPL111W						YJL153C	YPL187W	YPL187W
YKR041W	YHR012W	YKR041W		YGL153W	YMR069W	YMR069W		YBL059C-A	YNL043C	YBL059C-A		YDL115C	YDR288W	YDR288W						YPR014C	YJR050W			YPL201C	YBR295W	YBR295W						YBR220C	Q0065	Q0065
YKL161C	YLR444C	YKL161C		YBL074C	YHR172W	YHR172W		YOR186C-A	YBR154C	YOR186C-A		YLR297W	YPR132W	YPR132W						YGR139W	YBR090C			YNL220W	YLR126C	YLR126C						YPR128C	YIL105W-A	YIL105W-A
YHR144C	YJL166W	YHR144C		YNL191W	YAL059C-A	YAL059C-A		YBR164C	YMR230W	YBR164C		YJL166W	YDR320C-A	YDR320C-A						YLR174W	YGR182C			YJL134W	YLL058W	YLL058W						YNL142W	YLR462W	YLR462W
YBR049C	YPL211W	YBR049C		YPL233W	YKR097W	YKR097W		YBR154C	YDL092W	YBR154C		YPL271W	YBL040C	YBL040C						YOR383C	YPR102C			YHR215W	YMR238W	YMR238W						YBR291C	YHR069C-A	YHR069C-A
YBR065C	YGR088W	YBR065C		YMR198W	YMR032W	YMR032W		YDL092W	YDR378C	YDL092W		YPR102C	YCL022C	YCL022C						Q0075	YPL124W			YNL067W	YHR218W	YHR218W						YMR244W	YNL205C	YNL205C
YCL029C	YMR188C	YCL029C		YNL328C	YLR154C-H	YLR154C-H		YNL043C	YER159C	YNL043C		YGL080W	YAR030C	YAR030C						YBL008W-A	YCR016W			YGR177C	YEL049W	YEL049W						YHL012W	Q0142	Q0142
YMR036C	YJL156C	YMR036C		YJL019W	YLR156C-A	YLR156C-A		YER159C	YAR030C	YER159C		YBR056W	YDL152W	YDL152W						YNR060W	YLR123C			YOR298W	YLR365W	YLR365W						YJR073C	YIR040C	YIR040C
YGL061C	YBL062W	YGL061C		YJL043W	YLR157C-C	YLR157C-C		YKL001C	YCR024C-B	YKL001C		YPL185W	YOR279C	YOR279C						YDR182W-A	YLR325C			YGR199W	YIL014C-A	YIL014C-A						YEL030C-A	YPR160C-A	YPR160C-A
YHR071W	YCR090C	YHR071W		YJL182C	YLR159C-A	YLR159C-A		YMR028W	YJR082C	YMR028W		YKR040C	YPL065W	YPL065W						YIL047C	YDR471W			YGL091C	Q0182	Q0182						YCL026C-A	YPR076W	YPR076W
YGL182C	YGR034W	YGL182C		YDR246W-A	YOL013W-A	YOL013W-A		YGR135W	YKL009W	YGR135W		YCL022C	YGR105W	YGR105W						YKR039W	YGR164W			YER147C	YER153C	YER153C						YEL053W-A	YGR139W	YGR139W
YOR282W	YPR094W	YOR282W		YDR113C	YDR044W	YDR044W		YJR082C	YBL059C-A	YJR082C		YAL026C-A	YGR118W	YGR118W						YER152C	YOR198C			YOL030W	YLR237W	YLR237W						YJL169W	YDL034W	YDL034W
YGR259C	YDR340W	YGR259C		YNR067C	YGL188C-A	YGL188C-A		YFR004W	YBR164C	YFR004W		YPR132W	YBR253W	YBR253W						YNR071C	YOR028C			YML116W	YER056C	YER056C						YPL119C-A	YHR056W-A	YHR056W-A
YPL032C	YNL013C	YPL032C		YGL028C	YIL142C-A	YIL142C-A		YIL138C	YFR004W	YIL138C		YDR288W	YBR201C-A	YBR201C-A						YBR291C	YGR035C			YLL053C	YLL012W	YLL012W						YOR300W	YER014C-A	YER014C-A
YNL233W	YIL108W	YNL233W		YDR019C	YGL175C	YGL175C		YMR143W	YNR024W	YMR143W		YKR085C	YOL162W	YOL162W						YBR182C-A	YMR315W			YBR092C	YEL032W	YEL032W						YJL171C	YLL067C	YLL067C
YEL066W	YPR200C	YEL066W		YOR035C	YGR164W	YGR164W		YDR461C-A	YGR135W	YDR461C-A		YDL007W	YBR128C	YBR128C						YBR220C	YML030W			YHL012W	YPR020W	YPR020W						YBR208C	YEL075W-A	YEL075W-A
YJL019W	YNR071C	YJL019W		YBR098W	YBL031W	YBL031W		YKL056C	YKL001C	YKL056C		YDR320C-A	YKL009W	YKL009W						YMR031W-A	YDR201W			YNR017W	YLR377C	YLR377C						YBR134W	YFL034C-A	YFL034C-A
YDR123C	YNL286W	YDR123C		YNR050C	YJL026C-A	YJL026C-A		YDL075W	YMR028W	YDL075W		YBL040C	YNL070W	YNL070W						YOR169C	YDL181W			YCR102C	YMR122W-A	YMR122W-A						YHR126C	YIL032C
YDR158W	YPL024W	YDR158W		YLR377C	YDR146C	YDR146C		YKL009W	YLR435W	YKL009W		YPL065W	YOR115C	YOR115C						YNL019C	YOR053W			YDR502C	YLR438W	YLR438W						YDR535C	YDR424C
YIL026C	YCL011C	YIL026C		YDL117W	YDL241W	YDL241W		YOR159C	YOR159C	YOR159C		YBR128C	YPR143W	YPR143W						YNL202W	YML094W			YOR034C	YPL189C-A	YPL189C-A						YOR170W	YHR001W-A
YLR052W	YBR154C	YLR052W		YCL023C	YMR189W	YMR189W		YNR024W	YIL138C	YNR024W		YBR253W	YBR089C-A	YBR089C-A						YJL219W	YDR008C			YHR214W	YFR018C	YFR018C						Q0055	YDR067C
YNR040W	YOR193W	YNR040W		YDR213W	YMR163C	YMR163C		YGL041C-B	YGL041C-B	YGL041C-B		YOR279C	YOR015W	YOR015W						YOR389W	YOL108C			YPR194C	YIL059C	YIL059C						YFL067W	YBR066C
YJL086C	YOR234C	YJL086C		YMR001C	YBR156C	YBR156C		YGL214W	YDL075W	YGL214W		YAR030C	YGR240C-A	YGR240C-A						Q0105	YOR115C			YIL163C	YDL217C	YDL217C						YOR072W	YLR151C
YDR518W	YDR315C	YDR518W		YJL120W	YJR092W	YJR092W		YFL063W	YKL056C	YFL063W		YGR118W	YBL078C	YBL078C						YIL108W	YBL107C			YHR166C	YCL026C-B	YCL026C-B						YLR331C	YER066C-A
YAR019W-A	YMR130W	YAR019W-A		YDR507C	YPL141C	YPL141C		YER112W	YGL214W	YER112W		YGR105W	YNL038W	YNL038W						YJL045W	YDR469W			YOR375C	YHR130C	YHR130C						YER152W-A	YPR151C
YPR096C	YKL018C-A	YPR096C		YLR122C	YML109W	YML109W		YLR435W	YMR143W	YLR435W		YOR115C	YDR183W	YDR183W						YIL039W	YML028W			YKL219W	YGL234W	YGL234W						YCR045W-A	YPR102C
YDL040C	YBR244W	YDL040C		YPR108W-A	YJR053W	YJR053W		YDR070C	YDR461C-A	YDR070C		YBR201C-A	YPL096W	YPL096W						YKL163W	YDR002W			YJR086W	YDR055W	YDR055W						YBR178W	YKL118W
YBR224W	YJR036C	YBR224W		YNL335W	YPR119W	YPR119W		YLR262C	YER112W	YLR262C		YNL070W	YOR258W	YOR258W						Q0065	YMR269W			YDR191W	YKL198C	YKL198C						Q0255	YOR281C
YLR210W	YEL020C	YLR210W		YAR035W	YLL024C	YLL024C		YBR253W	YGR020C	YBR253W		YOL162W	YDR378C	YDR378C						YDR384C	YDR070C			YPL272C	YBR144C	YBR144C						YKR039W	YIL008W
YCL023C	YKL161C	YCL023C		YFL059W	YMR120C	YMR120C		YGR020C	YDL009C	YGR020C		YOR015W	YFL012W	YFL012W						YDR118W-A	YIL142C-A			YOL020W	YER135C	YER135C						Q0105	YPL182C
YKR001C	YBR065C	YKR001C		YGR140W	YIL131C	YIL131C		YLR261C	YLR261C	YLR261C		YDL152W	YBR154C	YBR154C						YLR142W	YBR194W			YIL153W	YNL210W	YNL210W						YIL163C	YGR204C-A
YPL253C	YCL029C	YPL253C		YPR125W	YOR301W	YOR301W		YPR107C	YPR107C	YPR107C		YBL078C	YGL164C	YGL164C						YOR348C	YDL002C			YKR042W	YER007W	YER007W						Q0045	YBR027C
YNL058C	YHR144C	YNL058C		YLR334C	YLL032C	YLL032C		YNL038W	YBR253W	YNL038W		YKL009W	YNL136W	YNL136W						YOR084W	YER019C-A			YMR141W-A	YOL162W	YOL162W						YDR003W-A	YOR198C
YJL182C	YMR036C	YJL182C		YDL240W	YMR144W	YMR144W		YDL009C	YEL014C	YDL009C		YOR258W	YKL123W	YKL123W						YGL235W	YER146W			YNR060W	YEL053W-A	YEL053W-A						YER172C-A	YMR114C
YMR001C	YKR041W	YMR001C		YPR145W	YJR005C-A	YJR005C-A		YBL108C-A	YNL038W	YBL108C-A		YNL038W	YGR215W	YGR215W						YBR296C	YML098W			YOL106W	YBL042C	YBL042C						YEL075C	YBR051W
YGL075C	YBR049C	YGL075C		YOR146W	YKR033C	YKR033C		YGR085C	YLR262C	YGR085C		YDR183W	YFL017W-A	YFL017W-A						YHR032C-A	YBL109W			YKL004W	YGR075C	YGR075C						YJL156W-A	YPR099C
YLR217W	YGR259C	YLR217W		YBL071W-A	YGL088W	YGL088W		YMR150C	YGR085C	YMR150C		YGR240C-A	YCR018C-A	YCR018C-A						YNL203C	YCL050C			YNR066C	YJL091C	YJL091C						YHL049C	YMR159C
YDR451C	YHR071W	YDR451C		YER104W	YPL044C	YPL044C		YOR268C	YDR070C	YOR268C		YJL032W	YJL011C	YJL011C						YLR307C-A	YKL053W			YDL016C	YPL058C	YPL058C						YDR455C	YMR118C
YOR222W	YDR123C	YOR222W		YCR095W-A	YER190W	YER190W		YLR395C	YBR233W-A	YLR395C		YDR378C	YPR062W	YPR062W						YMR119W-A	YJR076C			YBL073W	YGL235W	YGL235W						Q0060	YPL239W
YGR146C	YOR282W	YGR146C		YNR009W	YNL327W	YNL327W		YEL014C	YOR261C	YEL014C		YPL096W	YOR366W	YOR366W						Q0275	YGL108C			YNL044W	YMR008C	YMR008C						YPR123C	YCR071C
YGL188C-A	YPL032C	YGL188C-A		YEL076C	YDL096C	YDL096C		YBR233W-A	YCL058C	YBR233W-A		YBR089C-A	YJL030W	YJL030W						YLR466W	YBR122C			YBR235W	YER011W	YER011W						YEL073C	YGL158W
YGR109C	YGL061C	YGR109C		YBR124W	YIL141W	YIL141W		YNL336W	YMR150C	YNL336W		YBR154C	YMR141C	YMR141C						YDL034W	YHR028W-A			YNL219C	Q0050	Q0050						YOR139C	YGR082W
YPL077C	YEL066W	YPL077C		YNL120C	YDL151C	YDL151C		YLR010C	YLR010C	YLR010C		YPR143W	YCL033C	YCL033C						YGR032W	YGL005C			YOR153W	YGL226C-A	YGL226C-A						YDR433W	YGR142W
YNL310C	YNL233W	YNL310C		YEL009C-A	YHR180W-A	YHR180W-A		YOR261C	YPL117C	YOR261C		YCL033C	YGR085C	YGR085C						YOR192C-C	YDL061C			YLR232W	YER081W	YER081W						YOR329W-A	YGR275W
YDR213W	YJL019W	YDR213W		YMR069W	YAL024C	YAL024C		YGR226C	YNL336W	YGR226C		YFL017W-A	YMR188C	YMR188C						YDR157W	YKL137W			YER060W	YIL012W	YIL012W						YDR182W-A	YMR158W
YJL184W	YLR052W	YJL184W		YOL013W-A	YDR526C	YDR526C		YNL259C	YDL172C	YNL259C		YNL136W	YDL009C	YDL009C						YBR208C	YER131W			YDR263C	YGL063W	YGL063W						YNL057W	YDR014W-A
YBR232C	YGL182C	YBR232C		YDL062W	YER038W-A	YER038W-A		YER042W	YKL196C	YER042W		YGL164C	YER159C	YER159C						YNL117W	YGL088W			YJL172W	YER119C	YER119C						YJL079C	YBR157C
YGL028C	YNR040W	YGL028C		YFR036W	YLR458W	YLR458W		YPR100W	YGR118W	YPR100W		YGR215W	YER142C	YER142C						YNL205C	YER121W			YBR115C	YKL132C	YKL132C						YHR130C	YJL188C
YLR390W	YDR158W	YLR390W		YHR172W	YHR193C-A	YHR193C-A		YDR286C	YPR100W	YDR286C		YFL012W	YDL092W	YDL092W						YMR303C	YGL174W			YNL204C	YNL202W	YNL202W						YHR165W-A	YPR087W
YEL030W	YIL026C	YEL030W		YJL107C	YAR068W	YAR068W		YDL172C	YHR005C-A	YDL172C		YJL030W	YGL103W	YGL103W						YPL187W	YNL180C			YJL135W	YPL036W	YPL036W						Q0085	YJR118C
YLR156C-A	YBR224W	YLR156C-A		YAL059C-A	YOR025W	YOR025W		YHR005C-A	YLR395C	YHR005C-A		YMR141C	YLR434C	YLR434C						YDR442W	YAL003W			YBR093C	YGL156W	YGL156W						YBR032W	YCR003W
YLR157C-C	YDR518W	YLR157C-C		YKR097W	YJR140W-A	YJR140W-A		YGR118W	YER042W	YGR118W		YMR188C	Q0010	Q0010						YNL014W	YDR383C			Q0110	YHL040C	YHL040C						YER135C	YDL069C
YLR154C-H	YDL040C	YLR154C-H		YDL241W	YBR266C	YBR266C		YDL191W	YNL259C	YDL191W		YGR085C	YBR230C	YBR230C						YKR032W	YMR242C			YNR075W	YOR291W	YOR291W						YOR105W	YPR141C
YLR159C-A	YLR210W	YLR159C-A		YMR032W	YOR325W	YOR325W		YKL196C	YNL153C	YKL196C		YCR018C-A	YNL286W	YNL286W						YHR139C	YDR486C			YLR046C	YPR001W	YPR001W						YNL033W	YIL063C
YDR022C	YPL253C	YDR022C		YLR159C-A	YLR465C	YLR465C		YMR286W	YGR226C	YMR286W		YER142C	YDL002C	YDL002C						YLR342W-A	YGL189C			YJL127C-B	YNR071C	YNR071C						YAL047W-A	YLL047W
YPL261C	YJL182C	YPL261C		YLR157C-C	YMR306C-A	YMR306C-A		YPL117C	YMR286W	YPL117C		YKL123W	YHR132W-A	YHR132W-A						YER065C	YNL162W			YJL158C	YMR303C	YMR303C						Q0115	YNR025C
YMR166C	YKR001C	YMR166C		YLR156C-A	YGR022C	YGR022C		YGR129W	YGR129W	YGR129W		YJL011C	YGR106C	YGR106C						YGL156W	YGR253C			YEL040W	YER065C	YER065C						YOR169C	YOR020W-A
YNL198C	YLR217W	YNL198C		YLR154C-H	YOR248W	YOR248W		YNL153C	YDL191W	YNL153C		YGL103W	YGR206W	YGR206W						YPL119C-A	YBR082C			YER148W	YOR072W	YOR072W						Q0160	YMR158W-B
YJL107C	YMR001C	YJL107C		YGL188C-A	YNL296W	YNL296W		YEL012W	YDR286C	YEL012W		YPR062W	YDR162C	YDR162C						YNL033W	YOL077W-A			YNL090W	YER039C	YER039C						YHR182C-A	YLR145W
Q0070	YNL058C	Q0070		YDR044W	YDR521W	YDR521W		YNL200C	YHR180W-A	YNL200C		YDL009C	YKL156W	YKL156W						YDL085W	YGR148C			YLR400W	YBR226C	YBR226C						Q0075	YKR085C
YJL120W	YOR222W	YJL120W		YIL142C-A	YER165C-A	YER165C-A		YPR109W	YEL012W	YPR109W		YOR366W	YGL220W	YGL220W						YPR054W	YPR120C			YLR134W	YEL065W	YEL065W						Q0275	YIL057C
YDR014W-A	YPR096C	YDR014W-A		YGL175C	YDR149C	YDR149C		YLR284C	YBR089C-A	YLR284C		YBR230C	YDR342C	YDR342C						Q0160	YNR022C			YAL054C	YHR042W	YHR042W						YJL195C	YLR204W
YCR064C	YDR213W	YCR064C		YBL031W	YGL235W	YGL235W		YFL046W	YPR109W	YFL046W		YHR132W-A	YJL199C	YJL199C						YFR032C	YHR187W			YIR031C	YGR045C	YGR045C						Q0182	YDL100C
YGR160W	YGL075C	YGR160W		YGR164W	YCL026C-B	YCL026C-B		YCL058C	YAL059W	YCL058C		YGR106C	YFR052C-A	YFR052C-A						YDR535C	YML083C			YLR120C	YMR317W	YMR317W						YNL339C	YLR298C
YDL241W	YDR451C	YDL241W		YDL022C-A	YNL285W	YNL285W		YJR057W	YGL258W-A	YJR057W		YDL092W	YNL015W	YNL015W						YIL160C	YDR374W-A			YHR039C	YMR031W-A	YMR031W-A						YPL187W	YLR309C
YOR272W	YGL188C-A	YOR272W		YMR163C	YLR385C	YLR385C		YGL121C	YOL162W	YGL121C		YNL286W	YPL117C	YPL117C						YOR391C	YKL136W			YDR537C	YNL203C	YNL203C						YHR032W-A	YOL014W
YDR116C	YBR232C	YDR116C		YMR189W	YEL032C-A	YEL032C-A		YJL004C	YNL215W	YJL004C		YER159C	YDR183C-A	YDR183C-A						YLR377C	YOR174W			YPR116W	YER172C-A	YER172C-A						Q0065	YMR028W
YER124C	YGR146C	YER124C		YJL026C-A	YNL017C	YNL017C		YGR206W	YLR284C	YGR206W		YDL002C	YDR336W	YDR336W						YIL123W	YDL099W			YPL096C-A	YIR032C	YIR032C						YHR069C-A	YFR032C-B
YML083C	YJL184W	YML083C		YDR146C	YJL175W	YJL175W		YHR180W-A	YJR057W	YHR180W-A		YGR206W	YOR287C	YOR287C						YMR086C-A	YGR230W			YHL047C	YIL108W	YIL108W						YLR462W	YKL138C-A
YEL076C	YPL077C	YEL076C		YBR156C	YDR355C	YDR355C		YOL032W	YFL046W	YOL032W		YKL156W	YPR101W	YPR101W						YMR194C-A	YDL158C			YER099C	YJL153C	YJL153C						YER023C-A	YML071C
YGL174W	YNL310C	YGL174W		YJR092W	YGL041C	YGL041C		YPL065W	YGR206W	YPL065W		YDR162C	YLR065C	YLR065C						YDR269C	YPL037C			YBR219C	YLL055W	YLL055W						YNL205C	YOR314W
YPR145W	YGR109C	YPR145W		YML109W	YDR278C	YDR278C		YDR201W	YDR201W	YDR201W		YGL220W	YIL030W-A	YIL030W-A						YAL065C	YEL009C-A			YCR025C	YNL142W	YNL142W						YGR139W
YDR044W	YLR390W	YDR044W		YPL141C	YIL021C-A	YIL021C-A		YBR089C-A	YJL004C	YBR089C-A		YDR342C	YBR256C	YBR256C						YIR018C-A	YPR044C			YJL160C	YOR389W	YOR389W						YDR169C-A
YHR152W	YAR019W-A	YHR152W		YLL024C	YOL046C	YOL046C		YNL215W	YNL200C	YNL215W		YNL015W	YLR312C	YLR312C						YJL175W	YHR219W			YIL160C	YHR214W-A	YHR214W-A						YEL076C-A
YNL120C	YJL086C	YNL120C		YJR053W	YFL068W	YFL068W		YBL040C	YNL114C	YBL040C		YJL199C	YOR357C	YOR357C						YHR032W-A	YML095C			YMR187C	YPL184C	YPL184C						YLR464W
YCL037C	YEL030W	YCL037C		YPR119W	YLL066W-A	YLL066W-A		YKL033W-A	YBL040C	YKL033W-A		YLR434C	YMR169C	YMR169C						YCR010C	YKL091C			YHR213W	YMR119W-A	YMR119W-A						YHR032C-A
YDR146C	YLR154C-H	YDR146C		YMR120C	YLL067W-A	YLL067W-A		YAL059W	YPL065W	YAL059W		YMR169C	YBR268W	YBR268W						YEL075W-A	YHR021C			YJL222W-B	YDR215C	YDR215C						YJR079W
YHR028W-A	YLR156C-A	YHR028W-A		YKR033C	YHR218W	YHR218W		YER012W	YJR157W	YER012W		YPR101W	YLR460C	YLR460C						YJL156W-A	YDR154C			YDL210W	YER152C	YER152C						Q0297
YHL031C	YLR157C-C	YHL031C		YIL131C	YAL004W	YAL004W		YPR046W	YGL121C	YPR046W		Q0010	YKL053C-A	YKL053C-A						YIL165C	YGR135W			YDR003W-A	YLR034C	YLR034C						YDL034W
YJL078C	YLR159C-A	YJL078C		YOR301W	YNL339C	YNL339C		YOL162W	YGR063C	YOL162W		YOR357C	YJR100C	YJR100C						YPR001W	YKL065C			YMR088C	YER017C	YER017C						YEL010W
YDR113C	YGR160W	YDR113C		YLL032C	YHR175W-A			YGR063C	YKL033W-A	YGR063C		YDR336W	YOR277C	YOR277C						YPL062W	YFR001W			YHR216W	YNL235C	YNL235C						YKL223W
YEL059W	YGL028C	YEL059W		YMR144W	YDR182W-A			YHR132W-A	YPR046W	YHR132W-A		YFR052C-A	YNL155W	YNL155W						YBR134W	YPR053C			YJL222W	YIL039W	YIL039W						YLR222C-A
YHR143W	YMR166C	YHR143W		YJR005C-A	YPR016W-A			YDR383C	YIR030W-A	YDR383C		YPL117C	YER126C	YER126C						YAL054C	YBL072C			YHL046W-A	YBR291C	YBR291C						YDR464C-A
YNL104C	YDR022C	YNL104C		YGL088W	YCL066W			YLR036C	YNL133C	YLR036C		YKL053C-A	YDR308C	YDR308C						YIR040C	YML009C			YLL051C	YPR128C	YPR128C						YOR161C-C
YLR235C	YJL107C	YLR235C		YPL044C	YCR040W			YDR253C	YER012W	YDR253C		YLR312C	YJL123C	YJL123C						YPL036W	YDR016C			YJR077C	YIL117C	YIL117C						Q0080
YMR183C	YNL198C	YMR183C		YNL327W	YGR169C-A			YNL133C	YHR132W-A	YNL133C		YLR065C	YGR020C	YGR020C						YJL195C	YBL092W			YEL064C	YJL175W	YJL175W						YDR442W
YGR142W	YCL023C	YGR142W		YER190W	YIL008W			YKL026C	YOL032W	YKL026C		YBR268W	YCR016W	YCR016W						YJR095W	YOR202W			YGR242W	YJL052W	YJL052W						YER085C
YLL024C	YCR064C	YLL024C		YFL065C	YDR288W			YGL102C	YLR036C	YGL102C		YBR256C	YKL001C	YKL001C						YHR126C	YJR115W			YKR045C	YFR032C	YFR032C						YIL105W-A
YNL072W	YOR272W	YNL072W		YIL141W	YLR154W-F			YBR167C	YGL102C	YBR167C		YJR100C	YDR248C	YDR248C						YHR069C-A	YMR118C			YDR410C	YIL047C	YIL047C						Q0142
YFR035C	Q0070	YFR035C		YDL096C	YGL263W			YIR030W-A	YDR383C	YIR030W-A		YDR183C-A	YGL244W	YGL244W						YDR433W	YJL190C			YNL192W	YOR170W	YOR170W						YIR040C
YLL066W-B	YPL261C	YLL066W-B		YDL151C	YLR147C			YCL067C	YLR200W	YCL067C		YIL030W-A	YLR036C	YLR036C						YKR073C				YOR348C	YOR306C	YOR306C						YPR160C-A
YAL003W	YDR014W-A	YAL003W		YHR180W-A	YMR086C-A			YCR039C	YDR253C	YCR039C		YDR308C	YNL303W	YNL303W						YFL067W				YER060W-A	YEL042W	YEL042W						YPR076W
YOR331C	YDR116C	YOR331C		YHR193C-A	YOR193W			YLR325C	YCL067C	YLR325C		YOR287C	YDR328C	YDR328C						YIL105W-A				YDR492W	YLR390W-A	YLR390W-A						YHR056W-A
YDL117W	YJL120W	YDL117W		YDR526C	YDR066C			YPL143W	YCR039C	YPL143W		YNL155W	YJR050W	YJR050W						YOR139C				YCL038C	YOR084W	YOR084W						YER014C-A
YBR146W	YDR044W	YBR146W		YJR140W-A	YBR056C-B			YPR170W-B	YBR167C	YPR170W-B		YDR248C	YDR179C	YDR179C						YHR165W-A				YLR365W	YER188W	YER188W						YLL067C
YDR246W-A	YGL174W	YDR246W-A		YAL024C	YER046W			YKL006C-A	YLR325C	YKL006C-A		YOR277C	YDR114C	YDR114C						YOR108C-A				YDR269C	YER184C	YER184C						YEL075W-A
YGL152C	YEL076C	YGL152C		YAR068W	YER006C-A			YJR157W	YKL006C-A	YJR157W		YLR036C	YDR494W	YDR494W						YPR123C				YBL015W	YDR455C	YDR455C						YFL034C-A
YBR098W	YCL037C	YBR098W		YER038W-A	YDR533C			YPL090C	YKL026C	YPL090C		YJL123C	YAL059W	YAL059W						YNL067W-B				YEL046C	YER113C	YER113C
YNR067C	YER124C	YNR067C		YLR458W	YNL157W			YLR200W	YPL090C	YLR200W		YKL001C	YOR189W	YOR189W						YGR122C-A				YFL030W	Q0255	Q0255
YHR018C	YNL120C	YHR018C		YOR325W	YNR024W			YGL258W-A	YOR170W	YGL258W-A		YGR020C	YBR201W	YBR201W						YPL200W				YBR004C	YJR150C	YJR150C
YNL017C	YPR145W	YNL017C		YOR248W	YLR400W			YBR013C	YPR170W-B	YBR013C		YLR460C	YOL032W	YOL032W						YHR131W-A				YER070W	YLR154W-B	YLR154W-B
YLR286C	YML083C	YLR286C		YOR025W	YPL024W			YOL159C-A	YJR141W	YOL159C-A		YDR328C	YOR167C	YOR167C						YLR461W				YDL093W	YDR384C	YDR384C
YPR125W	YDR146C	YPR125W		YMR306C-A	YNL146C-A			YNL114C	YAL026C-A	YNL114C		YOR189W	YMR114C	YMR114C						YEL030C-A				YHL016C	YEL020C	YEL020C
YPR119W	YHR152W	YPR119W		YGR022C	YLR421C			YJR141W	YPL143W	YJR141W		YOL032W	YOR021C	YOR021C						YLR280C				YER091C	YHR139C	YHR139C
YGL153W	YHR028W-A	YGL153W		YLR463C	YBR254C			YDR336W	YAL064W	YDR336W		YJR050W	YFR032C-B	YFR032C-B						YML133C				YER144C	YJL171C	YJL171C
YGR140W	YJL078C	YGR140W		YBR266C	YPL142C			YAL026C-A	YOL159C-A	YAL026C-A		YOR167C	YPR134W	YPR134W						YER152W-A				YPL111W	YJL169W	YJL169W
YDL240W	YDL241W	YDL240W		YLR465C	YGR024C			YMR107W	YLR460C	YMR107W		YER126C	YLR041W	YLR041W						YAR020C				YER190W	YIR018C-A	YIR018C-A
YOR263C	YHL031C	YOR263C		YNL296W	YPL033C			YMR059W	YDR336W	YMR059W		YNL303W	YBR164C	YBR164C						YNR077C				YBR295W	YPR202W	YPR202W
YGL007W	YHR143W	YGL007W		YDR521W	YOL165C			YDR327W	YNL155W	YDR327W		YDR114C	YMR286W	YMR286W						YIR020W-A				YLR126C	YBR056C-B	YBR056C-B
YBR130C	YDR113C	YBR130C		YER165C-A	YPL273W			YNL155W	YMR059W	YNL155W		YGL244W	YDR058C	YDR058C						YDR464C-A				YLL058W	YJL015C	YJL015C
YOL007C	YNL104C	YOL007C		YDR149C	YGR074W			YER071C	YKL160W	YER071C		YDR494W	YKL068W-A	YKL068W-A						YOR161W-B				YEL049W	YGR139W	YGR139W
YBR089W	YGR142W	YBR089W		YEL032C-A	YHR136C			YOR170W	YMR107W	YOR170W		YBR201W	YLR292C	YLR292C						YER085C				YMR238W	YKR032W	YKR032W
YOR146W	YMR183C	YOR146W		YNL285W	YDR034C-A			YHR050W-A	YHR214C-E	YHR050W-A		YCR016W	YPL090C	YPL090C						YNL339C				YCL026C-B	YKL163W	YKL163W
YHR172W	YLL066W-B	YHR172W		YLR385C	YBR175W			YKL160W	YBR013C	YKL160W		YDR058C	YOR293W	YOR293W						YHR054C				YIL014C-A	YBR222C	YBR222C
YFR046C	YEL059W	YFR046C		YJL175W	YCR096C			YIR024C	YDR327W	YIR024C		YDR179C	YMR052C-A	YMR052C-A						YER023C-A				YHR218W	Q0055	Q0055
YML109W	YFR035C	YML109W		YDR355C	YMR260C			YLR460C	YOL106W	YLR460C		YMR114C	YLR062C	YLR062C						YGR294W				YBR144C	YMR244W	YMR244W
YDR507C	YNL072W	YDR507C		YNL017C	YBL062W			YKR035C	YER071C	YKR035C		YAL059W	YDR045C	YDR045C						YHR125W				YDR182W-A	Q0250	Q0250
YGR082W	YLL024C	YGR082W		YGL041C	YFL028C			YDR114C	YDR114C	YDR114C		YBR164C	YCR075W-A	YCR075W-A						YOR329W-A				YOL162W	YBR220C	YBR220C
YPL044C	YAL003W	YPL044C		YGL235W	YKL219W			YDR473C	YPL080C	YDR473C		YOR021C	YGR275W	YGR275W						YFL065C				YLR237W	YNR041C	YNR041C
YNL191W	YDL117W	YNL191W		YCL026C-B	YPR046W			YKR094C	YHR130C	YKR094C		YFR032C-B	YOR312C	YOR312C						YPR076W				YER056C	YAL065C	YAL065C
YNR009W	YOR331C	YNR009W		YNL339W-B	YOR261C			YOL106W	YIR024C	YOL106W		YPR134W	YBL108C-A	YBL108C-A						YER014C-A				YPR020W	YJR073C	YJR073C
YER068C-A	YBR146W	YER068C-A		YML133W-B	YJR025C			YCR098C	YDR473C	YCR098C		YLR041W	YBR278W	YBR278W						YJL119C				YEL032W	YMR086C-A	YMR086C-A
YIL141W	YBR098W	YIL141W		YHR219C-A	YJL179W			YMR169C	YKR035C	YMR169C		YMR286W	YCL067C	YCL067C						YPR160C-A				YER153C	YIL123W	YIL123W
YBL071W-A	YGL152C	YBL071W-A		YDR278C	YIL113W			YGL020C	YHR050W-A	YGL020C		YPL090C	YCR039C	YCR039C						YLR462W				YHR130C	Q0060	Q0060
YPL250W-A	YNR067C	YPL250W-A		YOL046C	YBL026W			YHR130C	YKR094C	YHR130C		YLR292C	YDL136W	YDL136W						YGR270C-A				YLL012W	YBR296C	YBR296C
YMR069W	YNL017C	YMR069W		YPR204C-A	YML011C			YGL109W	YGL020C	YGL109W		YKL068W-A	YNL149C	YNL149C						YLR331C				YDL217C	YGR032W	YGR032W
YAL059C-A	YDR246W-A	YAL059C-A		YPL283W-B	YOR015W			YOR115C	YGL204C	YOR115C		YCR075W-A	YAR003W	YAR003W						YHR182C-A				YIL059C	YEL073C	YEL073C
YPL141C	YHR018C	YPL141C		YGR296C-B	YMR188C			YBR201C-A	YBR201C-A	YBR201C-A		YOR293W	YGR042W	YGR042W						YHR056W-A				YLR377C	YLR342W-A	YLR342W-A
YBR113W	YLR235C	YBR113W		YER190C-B				YOR143C	YGL109W	YOR143C		YOR312C	YPL099C	YPL099C						YDR545C-A				YPL189C-A	YHR032W-A	YHR032W-A
YJL175W	YPR125W	YJL175W		YIL021C-A				YPL080C	YMR233W	YPL080C		YMR052C-A	YDR272W	YDR272W						YML009W-B				YER135C	YCL026C-A	YCL026C-A
YOR301W	YLR286C	YOR301W		YFL068W				YBR256C	YCR098C	YBR256C		YGR275W	YPL035C	YPL035C						YDL247W				YIL012W	YPL062W	YPL062W
YGL175C	YGR140W	YGL175C		YLL066W-A				YGR161W-C	YOR115C	YGR161W-C		YDR045C	YAL008W	YAL008W						YLR062C				YMR122W-A	YKR039W	YKR039W
YAL045C	YGL153W	YAL045C		YLL067W-A				YLR297W	YGR035W-A	YLR297W		YCL067C	YHR180W-A	YHR180W-A						YLR061W				YFR018C	Q0105	Q0105
YMR163C	YPR119W	YMR163C		YHR218W				YMR233W	YOR143C	YMR233W		YCR039C	YMR233W	YMR233W										YBR182C-A	YNL033W	YNL033W
YER104W	YDL240W	YER104W		YNL339C				YDR005C	YBR256C	YDR005C		YDR272W	YLR367W	YLR367W										YHR032C-A	Q0085	Q0085
YJL026C-A	YOR146W	YJL026C-A		YAL004W				YHR184W	YGR161W-C	YHR184W		YLR062C	YLR053C	YLR053C										YNL210W	YNL019C	YNL019C
YDR526C	YBR130C	YDR526C		YIL177C				YBR210W	YDL007W	YBR210W		YBR278W	YKL026C	YKL026C										YKL198C	Q0115	Q0115
YEL009C-A	YOL007C	YEL009C-A						YBR137W	YLR297W	YBR137W		YAR003W	YNL081C	YNL081C										YLR438W	YNL205C	YNL205C
YGL088W	YOR263C	YGL088W						YHR181W	YKL172W	YHR181W		YPL099C	YAR027W	YAR027W										YGL235W	Q0065	Q0065
YNL296W	YBR089W	YNL296W						YER146W	YDR005C	YER146W		YAL008W	YPL196W	YPL196W										YGL234W	YPR054W	YPR054W
YJR053W	YGL007W	YJR053W						YPR028W	YHR184W	YPR028W		YDL136W	YMR075C-A	YMR075C-A										YDR055W	YOR192C-C	YOR192C-C
YEL075C	YHR172W	YEL075C						YPR101W	YLR145W	YPR101W		YGR042W	YBR302C	YBR302C										YER007W	YJL195C	YJL195C
YIL131C	YPL044C	YIL131C						YJL190C	YMR169C	YJL190C		YKL026C	YML132W	YML132W										YBL042C	YPR014C	YPR014C
YBR156C	YFR046C	YBR156C						YKL138C-A	YJL190C	YKL138C-A		YAR027W	YDL069C	YDL069C										YEL053W-A	YJL079C	YJL079C
YNL327W	YML109W	YNL327W						YDL007W	YER146W	YDL007W		YLR367W	YDR377W	YDR377W										YGR075C	YIL165C	YIL165C
YFR036W	YDR507C	YFR036W						YFL014W	YHR181W	YFL014W		YNL149C	YLR406C	YLR406C										YJL091C	Q0075	Q0075
YDL062W	YGR082W	YDL062W						YCL055W	YKL138C-A	YCL055W		YLR053C	YLR346C	YLR346C										YPL058C	YLR142W	YLR142W
YDL151C	YNL191W	YDL151C						YAL064W	YBR210W	YAL064W		YPL035C	YPR204W	YPR204W										YGL226C-A	YFL067W	YFL067W
YOR325W	YNR009W	YOR325W						YGR035W-A	YPR101W	YGR035W-A		YPR204W	YCL001W	YCL001W										YMR008C	Q0045	Q0045
YDL022C-A	YPL250W-A	YDL022C-A						YJL161W	YCL055W	YJL161W		YML132W	YPR107C	YPR107C										Q0050	YEL050W-A	YEL050W-A
YLL032C	YIL141W	YLL032C						YML001W	YNL130C-A	YML001W		YBR302C	YCL055W	YCL055W										Q0182	YMR194C-A	YMR194C-A
YDL096C	YBL071W-A	YDL096C						YGL204C	YGR024C	YGL204C		YNL081C	YLR010C	YLR010C										YER081W	YAR020C	YAR020C
YBL031W	YER068C-A	YBL031W						YDR302W	YER046W-A	YDR302W		YDL069C	YBR217W	YBR217W										YER011W	YHR125W	YHR125W
YMR144W	YPL141C	YMR144W						YLR145W	YAL069W	YLR145W		YPL196W	YNL180C	YNL180C										YGL063W	YDR433W	YDR433W
YOR025W	YAL059C-A	YOR025W						YGR024C	YBR137W	YGR024C		YLR406C	YOR261C	YOR261C										YKL132C	YOR169C	YOR169C
YIL142C-A	YBR113W	YIL142C-A						YLR104W	YDR302W	YLR104W		YMR233W	YJL004C	YJL004C										YNL202W	YBR134W	YBR134W
YLR458W	YOR301W	YLR458W						YDR426C	YPR028W	YDR426C		YDR377W	YFR049W	YFR049W										YER119C	YPL200W	YPL200W
YAL024C	YGL175C	YAL024C						YBL029C-A	YPL035C	YBL029C-A		YLR010C	YLR218C	YLR218C										YHL040C	YKR073C	YKR073C
YER165C-A	YMR163C	YER165C-A						YPL035C	YDR426C	YPL035C		YCL055W	YJL140W	YJL140W										YGR045C	YBR208C	YBR208C
YHR193C-A	YMR069W	YHR193C-A						YKL172W	YLR104W	YKL172W		YMR075C-A	YGL226W	YGL226W										YPL036W	YOR329W-A	YOR329W-A
YBR266C	YAL045C	YBR266C						YER046W-A	YFL014W	YER046W-A		YPR107C	YKL033W-A	YKL033W-A										YNR071C	YIL105W-A	YIL105W-A
YAR068W	YJL026C-A	YAR068W						YDR183W	YJL161W	YDR183W		YCL001W	YDR210W	YDR210W										YOR072W	YHR069C-A	YHR069C-A
YLR385C	YER104W	YLR385C						YKL065C	YDR183W	YKL065C		YBR217W	YLR175W	YLR175W										YOR291W	YEL075W-A	YEL075W-A
YLR465C	YGL088W	YLR465C						YGR057C	YML001W	YGR057C		YFR049W	YJL161W	YJL161W										YGL156W	YDL034W	YDL034W
YER038W-A	YJR053W	YER038W-A						YKR068C	YPR012W	YKR068C		YOR261C	YLR146W-A	YLR146W-A										YBR226C	Q0275	Q0275
YDR521W	YIL131C	YDR521W						YER044C	YKL065C	YER044C		YJL004C	YOL149W	YOL149W										YPR001W	YHR131W-A	YHR131W-A
YDR149C	YEL009C-A	YDR149C						YPR012W	YBL029C-A	YPR012W		YHR180W-A	YLR325C	YLR325C										YMR303C	YOR139C	YOR139C
YDR278C	YBR156C	YDR278C						YCR020C-A	YKR068C	YCR020C-A		YLR346C	YIL127C	YIL127C										YER065C	YJL156W-A	YJL156W-A
YMR306C-A	YNL327W	YMR306C-A						YDR308C	YDR271C	YDR308C		YJL140W	YDL147W	YDL147W										YEL065W	YPR160C-A	YPR160C-A
YEL032C-A	YDR526C	YEL032C-A						YDR271C	YGR057C	YDR271C		YJL161W	YDR302W	YDR302W										Q0142	YER152W-A	YER152W-A
YDR355C	YNL296W	YDR355C						YPL196W	YCR020C-A	YPL196W		YKL033W-A	YDL121C	YDL121C										YER172C-A	YML133C	YML133C
YGL235W	YJL175W	YGL235W						YCR096C	YNL211C	YCR096C		YNL180C	YJR099W	YJR099W										YER039C	YPR076W	YPR076W
YFL068W	YFR036W	YFL068W						YNL211C	YDR308C	YNL211C		YOL149W	YKL117W	YKL117W										YHR042W	Q0160	Q0160
YLL066W-A	YDL062W	YLL066W-A						YBR211C	YCR096C	YBR211C		YLR218C	YBL026W	YBL026W										YMR031W-A	YGR294W	YGR294W
YLL067W-A	YDL151C	YLL067W-A						YDR427W	YPL196W	YDR427W		YGL226W	YBR211C	YBR211C										YFL031C-A	YLR331C	YLR331C
YEL075W-A	YEL075C	YEL075W-A						YJL142C	YER044C	YJL142C		YLR325C	YOR123C	YOR123C										YMR317W	YHR126C	YHR126C
YGL041C	YLL032C	YGL041C						YCR090C	YPR142C	YCR090C		YLR146W-A	YNL153C	YNL153C										YNL203C	YPR123C	YPR123C
YNL339C	YDL096C	YNL339C						YGR131W	YDR045C	YGR131W		YKL117W	YER121W	YER121W										YMR119W-A	YJL119C	YJL119C
YOL046C	YBL031W	YOL046C						YDR045C	YJL142C	YDR045C		YDR302W	YGR035W-A	YGR035W-A										YDR215C	YHR056W-A	YHR056W-A
YAL004W	YMR144W	YAL004W						YMR271C	YBR211C	YMR271C		YBL108C-A	YHR072W-A	YHR072W-A										YIR032C	YHR054C	YHR054C
YHR218W	YOR025W	YHR218W						YOL007C	YOL013W-B	YOL007C		YER121W	YLR076C	YLR076C										YIL108W	YER014C-A	YER014C-A
YIL021C-A	YOR325W	YIL021C-A						YKL185W	YDR427W	YKL185W		YDL147W	YDR168W	YDR168W										YNL235C	YPL187W	YPL187W
YOL050C	YIL142C-A							YAL021C	YLR154W-C	YAL021C		YBL026W	YNL336W	YNL336W										YOR389W	YHR182C-A	YHR182C-A
YBR099C	YAL024C							YBL012C	YGR131W	YBL012C		YJR099W	YDL222C	YDL222C										YJL153C	YLR462W	YLR462W
YOL150C	YLR458W							Q0075	YKL123W	Q0075		YBR211C	YFR008W	YFR008W										YHR214W-A	YLL067C	YLL067C
YKL223W	YDL022C-A							YBL065W	YPR143W	YBL065W		YNL153C	YGL161C	YGL161C										YLL055W	YDL247W	YDL247W
YCL076W	YER165C-A							YKL197C	YER046W	YKL197C		YDL222C	YBR282W	YBR282W										YNL142W	YLR062C	YLR062C
YMR321C	YBR266C							YLR213C	YMR271C	YLR213C		YAL037C-B	YOR044W	YOR044W										YPL184C	YLR061W	YLR061W
YDR442W	YCL026C-B							Q0120	YMR141C	Q0120		YLR076C	YGL230C	YGL230C										YJL175W	YDR545C-A	YDR545C-A
YNL130C-A	YLR385C							YFR056C	YCR090C	YFR056C		YDL121C	YDR372C	YDR372C										YLR034C	YFL015W-A
YML101C	YAR068W							YMR163C	YLR053C	YMR163C		YHR072W-A	YOL086W-A	YOL086W-A										YER152C	YLR012C
YDL155W	YHR193C-A							YCL037C	YMR294W	YCL037C		YDR210W	YLR147C	YLR147C										YIL039W	YLR145W
YPL158C	YER038W-A							YCL041C	YDR504C	YCL041C		YGL161C	YCR095C	YCR095C										YER017C	YBR194W
YPL124W	YLR465C							YDL117W	YJR100C	YDL117W		YOR123C	YGR230W	YGR230W										YPR128C	YMR183C
YGL094C	YGL235W							YAR060C	YPL099C	YAR060C		YNL336W	YJL173C	YJL173C										YBR291C	YHL013C
YMR024W	YDR521W							YHR212C	YDR372C	YHR212C		YIL127C	YJL130C	YJL130C										YIL117C	YMR114C
YAR002W	YDR278C							YDR038C	YLL050C	YDR038C		YDR168W	YIL013C	YIL013C										YLR466W	YJL007C
YOR035C	YDR149C							YOL081W	YHR145C	YOL081W		YLR175W	YEL017W	YEL017W										YDR455C	YJR043C
YDR226W	YEL075W-A							YDR044W	YJR058C	YDR044W		YGR035W-A	YHL040C	YHL040C										YLR222C-A	YBL059W
YPR126C	YFL068W							YDL182W	YDL157C	YDL182W		YFR008W	YJL083W	YJL083W										YJL052W	YNL215W
YFL059W	YLL066W-A							YOL019W	YDL115C	YOL019W		YOL086W-A	YHR098C	YHR098C										YIL047C	YCR003W
YKL183C-A	YLL067W-A							YER166W	YIL148W	YER166W		YBR282W	YLL040C	YLL040C										YDR535C	YDR412W
YOR248W	YMR306C-A							YPR123C	YNL157W	YPR123C		YOR044W	YNR063W	YNR063W										YOR170W	YLR052W
YJR158W	YDR355C							YIL057C	YCR060W	YIL057C		YGL230C	YPR194C	YPR194C										YFR032C	YKL037W
YEL076C-A	YEL032C-A							YJL127W-A	YJR085C	YJL127W-A		YDR372C	YDR213W	YDR213W										YOR306C	YIR004W
YLR464W	YGL041C							YJR129C	YMR188C	YJR129C		YJL173C	YGL064C	YGL064C										YEL042W	YPL051W
	YOL046C							YHL046W-A	YBL078C	YHL046W-A		YGR230W	YAL021C	YAL021C										YOR084W	YFR036W-A
	YAL004W							YJL045W	YJR050W	YJL045W		YLR147C	YLR428C	YLR428C										YER188W	YLR297W
	YHR218W							YOR035C	YBR257W	YOR035C		YCR095C	YGL007W	YGL007W										YER184C	YDR391C
	YIL021C-A							YAL059C-A	YLR333C	YAL059C-A		YCR067C	YEL042W	YEL042W										YLR390W-A	YMR173W
	YNL339C							YLR174W	YLR292C	YLR174W		YGR126W	YKL029C	YKL029C										YER113C	YKL123W
								YLR402W	YOR194C	YLR402W		YFR019W	YKR097W	YKR097W										Q0080	YKL089W
								YPR054W	YML004C	YPR054W		YGL088W	YJL127W-A	YJL127W-A										Q0255	YOR268C
								YNL262W	YDR494W	YNL262W		YJR066W	YAR060C	YAR060C										YDR384C	YCL050C
								YDR506C	YBR183W	YDR506C		YOR306C	YHR212C	YHR212C										YJR150C	YJL131C
								YGR041W	YDR272W	YGR041W		YPR042C	YPL016W	YPL016W										YJL015C	YOR276W
								YER060W	YBR244W	YER060W		YLR047C	YPL258C	YPL258C										YLR154W-B	YLR119W
								YJL107C	YDL166C	YJL107C		YLL038C	YML109W	YML109W										YJL169W	YHR028W-A
								YIL129C	YER088C-A	YIL129C		YER156C	YEL053C	YEL053C										YEL020C	YDR461C-A
								YOR026W	YOL109W	YOR026W		YEL025C	YDL156W	YDL156W										YKR032W	YGR135W
								YMR120C	YIL040W	YMR120C		YNL106C	YEL040W	YEL040W										YIR018C-A	YNL122C
								YBR065C	YML098W	YBR065C		YOR149C	YJR146W	YJR146W										YHR139C	YLR311C
								YIL162W	YCR028C-A	YIL162W		YNR075W	YMR307W	YMR307W										YBR056C-B	YLR273C
								YBR156C	YMR052C-A	YBR156C		YOL058W	YLR357W	YLR357W										YJL171C	YDR518W
								YIL066C	YCL042W	YIL066C		YPR032W	YER093C	YER093C										YGR139W	YKL097C
								YER097W	YMR174C	YER097W		YKL197C	YNL240C	YNL240C										YPR202W	YPR151C
								YLR338W	YML063W	YLR338W		YCR010C	YLR286C	YLR286C										YOR391C	YHR001W-A
								YDR150W	YOR006C	YDR150W		YLR338W	YBR113W	YBR113W										YBR222C	YMR311C
								YLR063W	YJL030W	YLR063W		YNL282W	YJL121C	YJL121C										YKL163W	YPR141C
								YLL040C	YBR282W	YLL040C		YBR078W	YLR063W	YLR063W										YAL065C	YIL008W
								YGL074C	YGR240C-A	YGL074C		YOR083W	YDR402C	YDR402C										Q0055	YKL214C
								YGL131C	YBL094C	YGL131C		YLR071C	YNL278W	YNL278W										Q0250	YOL165C
								YMR306W	YDR339C	YMR306W		YGR096W	YCL014W	YCL014W										YBR220C	YNR022C
								YDR215C	YER038C	YDR215C		YDR536W	YBR261C	YBR261C										YMR244W	YPR053C
								YKL038W	YGR230W	YKL038W		YBR158W	YDR384C	YDR384C										YMR086C-A	YDR121W
								YNL018C	YDR179C	YNL018C		YIL123W	YPL256C	YPL256C										YNR041C	YGR230W
								YIR023W	YLR147C	YIR023W		YBL065W	YDR314C	YDR314C										YJR073C	YLR309C
								YPL016W	YGR151C	YPL016W		YER052C	YDR127W	YDR127W										Q0060	YLR022C
								YBR182C	YDR469W	YBR182C		YLR342W	YOR348C	YOR348C										YBR296C	YKL011C
								YLR122C	YCR016W	YLR122C		YBL082C	YGL175C	YGL175C										YIL123W	YML074C
								YGL205W	YIL161W	YGL205W		YER152C	YCR006C	YCR006C										YLR342W-A	YDR356W
								YGR061C	YLR012C	YGR061C		YMR080C	YKL078W	YKL078W										YEL073C	YDR056C
								YCR048W	YJL015C	YCR048W		YBR156C	YGR134W	YGR134W										YGR032W	YGR280C
								YLR357W	YLR254C	YLR357W		YBL100C	YEL049W	YEL049W										YCL026C-A	YOL038W
								YIL006W	YOR044W	YIL006W		YNL018C	YJL108C	YJL108C										YPL062W	YDL139C
								YIL013C	YPR158W	YIL013C		YOR299W	YIL066C	YIL066C										YHR032W-A	YKL018C-A
								YEL053W-A	YDR115W	YEL053W-A		YGL126W	YGR061C	YGR061C										YKR039W	YDR152W
[truncated: 402 more rows]

## Sheet: 55fL
wt.vs.rpl22a				wt.vs.rpl22b				wt.vs.rpl34a				wt.vs.rpl34b				rpl22a.vs.rpl22b				rpl22a.vs.rpl34a				rpl22a.vs.rpl34b				rpl22b.vs.rpl34a				rpl22b.vs.rpl34b				rpl34a.vs.rpl34b
[truncated: 999 more rows]

[truncated: 5 more sheets: 60fL, 65fL, 70fL, 75fL, cumulative]
