# Supplementary material for: Translational control of methionine and serine metabolic pathways underpin the paralog-specific phenotypes of Rpl22 ribosomal protein mutants in cell division and replicative longevity
Source: bioRxiv preprint, doi:10.1101/2020.02.05.935726, version 1 (2020-02-06)
Supplement: File6 [file 935726_file07.xlsx]

## Sheet: 40fL
wt.vs.rpl22a					wt.vs.rpl22b					wt.vs.rpl34a					wt.vs.rpl34b					rpl22a.vs.rpl22b					rpl22a.vs.rpl34a					rpl22a.vs.rpl34b					rpl22b.vs.rpl34a					rpl22b.vs.rpl34b					rpl34a.vs.rpl34b
babel	DESeq2	edgeR	intersection		babel	DESeq2	edgeR	intersection		babel	DESeq2	edgeR	intersection		babel	DESeq2	edgeR	intersection		babel	DESeq2	edgeR	intersection		babel	DESeq2	edgeR	intersection		babel	DESeq2	edgeR	intersection		babel	DESeq2	edgeR	intersection		babel	DESeq2	edgeR	intersection		babel	DESeq2	edgeR	intersection
YOR369C	YGR069W	YGR069W	YOR369C		YDR278C	YAL004W	YAL004W	YDR278C		YLR167W	YAL004W	YAL004W	YLR167W		YMR269W	YNL117W	YDL223C	YMR269W		YPR043W	YPR043W	YBR157C	YPR043W		YDR278C	YNL017C	YDR343C	YDR278C		YCR061W	YER056C-A	YMR244W	YCR061W		YNL017C	YLR154C-H	YNL017C	YNL017C		YDR278C	YLR154C-H	YHR126C	YDR278C		YHR096C	YDR040C	YJL153C	YHR096C
YKL056C	YNL143C	YNL143C	YKL056C		YMR143W	YNL117W	YKL164C	YMR143W		YKL083W	YEL053W-A	YNL327W	YKL083W		YLR154W-C	YDL223C	YLR178C	YLR154W-C		YGR164W	YMR120C	YPR043W	YGR164W		YOR309C	YOR309C	YLR154C-H	YOR309C		YDR278C	YMR244W	YHR126C	YDR278C		YDR278C	YLR156C-A	YLR154C-H	YDR278C		YMR250W	YLR156C-A	YNL017C	YMR250W		YLR043C	YGL077C	YAL062W	YLR043C
YLR154W-C	YLR076C	YLR062C	YLR154W-C		YPR132W	YJL078C	YNL117W	YPR132W		YOR369C	YKL185W	YNL117W	YOR369C		YOR309C	YEL053W-A	YOR331C	YOR309C		YPL036W	YBR072W	YHL047C	YEL053W-A		YFR032C-A	YLR154C-H	YLR156C-A	YFR032C-A		YAL005C	YLR154C-H	YER056C-A	YAL005C		YGR259C	YLR157C-C	YLR156C-A	YMR250W		YGR088W	YLR157C-C	YLR154C-H	YGR088W		YAL005C	YOL058W	YOL058W	YAL005C
YMR143W	YMR173W-A	YLR076C	YMR143W		YDR447C	YNL014W	YNL327W	YDR447C		YHR141C	YJL078C	YKL164C	YHR141C		YGL029W	YLR178C	YER190W	YGL029W		YEL053W-A	YPL036W	YGR160W	YLR154W-E		YCL040W	YLR156C-A	YLR157C-C	YCL040W		YMR250W	YLR156C-A	YLR154C-H	YMR250W		YMR250W	YLR159C-A	YLR157C-C			YPL036W	YLR159C-A	YLR156C-A	YPL036W		YOL058W	YNL036W	YEL020C	YOL058W
YGR069W	YOR169C	YLR061W	YGR069W		YOR369C	YKR097W	YNL014W	YOR369C		YJL188C	YNL014W	YNL014W	YJL188C		YDL153C	YOR331C	YNL117W	YDL153C		YMR169C	YHR139C	YOR309C	YOR309C		YNL017C	YLR157C-C	YLR159C-A	YNL017C		YGR088W	YLR157C-C	YLR156C-A	YGR088W			YNL017C	YLR159C-A			YGL156W	YLR154W-E	YLR157C-C	YGL156W		YFL014W	YPL058C	YDR040C	YFL014W
YOR285W	YBL077W	YOR169C	YOR285W		YKL056C	YDR277C	YKR097W	YKL056C		YMR269W	YOR331C	YNR067C	YMR269W		YJL188C	YHR099W	YEL053W-A	YJL188C		YLR154W-E	YHL047C	YCR021C	YMR120C		YHR039C-A	YLR159C-A	YLR198C	YHR039C-A		YPR028W	YLR159C-A	YLR157C-C	YPR028W			YOL109W	YDR278C			YAL005C	YDR278C	YLR159C-A	YAL005C		YKL030W	YKR039W	YNL036W	YKL030W
YPR132W	YOR285W	YMR173W-A	YPR132W		YOR285W	YMR011W	YJL078C	YOR285W		YOR277C	YKR097W	YKR097W	YOR277C		YLR068W	YDR277C	YKL164C	YLR068W		YOR309C	YOR309C	YMR120C	YGR160W		YDR500C	YFR032C-A	YNL017C	YDR500C		YDL223C	YJL153C	YLR159C-A	YDL223C			YLR154W-E	YLR154W-E			YHR096C	YHR126C	YLR154W-E	YHR096C		YPR028W	YPL265W	YGL077C	YPR028W
YGL102C	YLR154W-B	YBL077W	YGL102C		YBR056W	YGR259C	YGR259C	YBR056W		YOR309C	YOR273C	YEL053W-A	YOR309C		YLR175W	YNL014W	YNL327W	YLR175W		YER103W	YEL053W-A	YBR066C	YNL143C		YGR259C	YLR154W-E	YDR278C			YLR178C	YDR278C	YJL153C	YLR178C			YLR198C	YNL285W			YGR164W	YGR164W	YDR278C	YGR164W		YDR382W	YKR097W	YNL142W	YDR382W
YNL143C	YOR369C	YLR154W-B	YNL143C		YGL102C	YPR125W	YMR011W	YGL102C		YLR388W	YNL066W	YGL028C	YLR388W		YMR294W-A	YMR086W	YNL014W	YMR294W-A		YER150W	YHL034W-A	YEL053W-A	YPR044C		YLR198C	YDR278C	YOR309C			YNL017C	YNL017C	YDR278C	YNL017C			YDR278C	YGR164W			YML128C	YMR244W	YMR244W	YML128C		YJL052W	YDR433W	YKR097W	YJL052W
YLR076C	YPR198W	YOR285W	YLR076C		YLR441C	YDR278C	YDR278C	YLR441C		YPR132W	YMR086W	YJL078C	YPR132W		YOR369C	YPR184W	YOL155C	YOR369C		YBR072W	YGR160W	YLR262C-A			YGR228W	YOL109W	YLR154W-E			YCL040W	YHR126C	YNL017C	YCL040W			YMR011W	YDR445C			YNL138W	YLR004C	YGR164W	YNL138W		YAL004W	YPR043W	YMR244W
YER117W	YKL056C	YOR369C	YER117W		YMR011W	YDR116C	YAL062W	YMR011W		YLR154W-C	YFR055W	YDR491C	YLR154W-C		YER002W	YBR003W	YBR072W	YER002W		YDR040C	YCR021C	YHL034W-A			YCR061W	YHR039C-A	YFR032C-A			YER070W	YBR093C	YBR296C	YER070W			YDR500C	YOL109W			YDL223C	YNL036W	YNL285W	YDL223C		YGR069W	YBR067C	YPR043W
YDR278C	YIL136W	YKL056C	YDR278C		YMR251W-A	YPL057C	YGR164W	YMR251W-A		YKL056C	YLR116W	YKL185W	YKL056C		YHR081W	YLR063W	YNR067C	YHR081W		YMR120C	YLR262C-A	YLR198C			YKL083W	YGL103W	YOL109W			YAL004W	YBR296C	YBR093C				YDR445C	YLR198C			YPR160W	YNL285W	YLR004C	YPR160W		YLR178C	YPR062W	YJL078C
YGL030W	YDR327W	YBR056W	YGL030W		YHR054C	YKL185W	YNL285W	YHR054C		YHL015W	YDR502C	YJL153C	YHL015W		YJL148W	YOR273C	YLL040C	YJL148W		YGR160W	YPL223C	YIL119C			YOR135C	YMR120C	YMR120C			YOR309C	YLR154W-E	YLR154W-E				YGR164W	YMR011W			YMR105C	YMR011W	YNL036W	YMR105C		YGR259C	YKL032C	YDR433W
YKR042W	YMR143W	YLR154W-C	YKR042W		YFL045C	YFR036W	YJR092W	YFL045C		YFR032C-A	YDL123W	YOR331C	YFR032C-A		YLR062C	YNL066W	YGL028C	YLR062C		YNL143C	YGR032W	YBR006W			YEL003W	YDR500C	YHR039C-A			YMR269W	YOL058W	YOL058W				YLR185W	YLR062C			YML056C	YLR438C-A	YGR069W	YML056C		YGL168W	YDR502C	YKR039W
YBR056W	YCL038C	YNL150W	YBR056W		YNL017C	YPL183W-A	YDR277C	YNL017C		YLR262C-A	YJL056C	YNL066W	YLR262C-A		YLR167W	YLR177W	YFR053C	YLR167W		YPR044C	YER103W	YGR032W				YOR182C	YPR143W			YKL083W	YEL020C	YEL020C				YLR388W	YDR500C			YER070W	YDR445C	YMR011W	YER070W		YNL143C	YPR065W	YPR062W
YDR327W	YNL115C	YPR198W	YDR327W		YGR034W	YGR164W	YGL028C	YGR034W		YHR039C-A	YER091C	YOR273C	YHR039C-A		YOR234C	YLR304C	YML100W	YOR234C		YMR011W	YBR157C	YDR519W				YJL189W	YCR016W			YLR198C	YOR306C	YOR306C				YFR032C-A	YKL083W			YGR256W	YGL029W	YDR445C	YGR256W		YOR169C	YGR019W	YPL265W
YDR342C	YNL150W	YJL188C	YDR342C		YML001W	YDR123C	YNR067C	YML001W		YML024W	YPL014W	YPL058C	YML024W		YPR062W	YPL085W	YAL004W	YPR062W		YMR303C	YMR169C	YLR287C-A				YER019C-A	YGL103W			YPR142C	YFR032C-A	YFR032C-A				YLR062C	YLR388W			YNL036W	YLR200W	YNL143C	YNL036W		YDL222C	YOL123W	YKL032C
YGR034W	YIL111W	YPR132W	YGR034W		YMR230W	YBR093C	YPR125W	YMR230W		YHR138C	YDL223C	YAL062W	YHR138C		YKL172W	YPR191W	YDR277C	YKL172W		YNL017C	YLR198C	YMR173W				YNL079C	YJL189W			YGL029W	YER146W	YCR005C				YKL083W	YLR185W			YML070W	YMR294W-A	YGL029W	YML070W			YER026C	YPR065W
YJR123W	YPR132W	YIL136W	YJR123W		YGL030W	YAL062W	YBR296C	YGL030W		YLR062C	YHR099W	YLL024C	YLR062C		YPL090C	YOR230W	YMR305C	YPL090C		YOR053W	YBR066C	YHR063W-A				YPL239W	YDR500C			YGL156W	YMR294W-A	YOR338W				YBR089C-A	YBL028C			YMR196W	YER029C	YLR438C-A	YMR196W			YDR497C	YBR006W
YKL006W	YLR154W-C	YOR277C	YKL006W		YML024W	YGL209W	YNL066W	YML024W		YDR447C	YGL064C	YDL223C	YDR447C		YFR032C-A	YFR019W	YER124C	YFR032C-A		YDR342C	YIL119C	YNL085W				YOR234C	YER019C-A			YLR068W	YOR338W	YHR018C				YMR294W-A	YFR032C-A			YMR294W-A	YOL109W	YLR200W	YMR294W-A			YJR109C	YGR019W
YLR441C	YBR056W	YDR327W	YLR441C		YBR159W	YNL066W	YGL209W	YBR159W		YGR034W	YPL058C	YDR502C	YGR034W		YLR076C	YKL034W	YER070W	YLR076C		YOR348C	YMR173W	YBL033C				YAL059W	YOR182C				YER006W	YER146W				YDR339C	YLR200W			YNL045W	YAL062W	YOL109W	YNL045W			YEL071W	YBR067C
YGL123W	YLR104W	YCL038C	YGL123W		YML063W	YEL053W-A	YML052W	YML063W		YOR234C	YJR137C	YFR055W	YOR234C		YLR262C-A	YFL034C-B	YNL066W	YLR262C-A		YPL240C	YBR006W	YHR143W				YLR185W	YAL059W				YER126C	YMR294W-A				YBL028C	YBR089C-A			YNL160W	YBR296C	YMR294W-A	YNL160W			YCR047C	YJR109C
YLR367W	YOR006C	YMR143W	YLR367W		YPR069C	YLR099C	YDL182W	YPR069C		YER117W	YFR030W	YER091C	YER117W		YKL082C	YCR093W	YBR003W	YKL082C		YHR096C	YLR287C-A	YBL081W				YLR062C	YNL079C				YCR005C	YPL058C				YLR200W	YMR294W-A			YPR191W	YDR460W	YER029C	YPR191W			YMR319C	YNL169C
YPR113W	YPL142C	YAL037C-B	YPR113W		YGL123W	YDL182W	YLR286C	YGL123W		YGL102C	YLR177W	YML100W	YGL102C		YNL017C	YGR237C	YHR099W	YNL017C		YLR154W-C	YOR182C	YNR046W				YLR388W	YLR185W				YLR009W	YOL109W				YNL285W	YCL058C			YIR038C	YBL028C	YBL028C	YIR038C			YER006W	YMR319C
YGL147C	YLR367W	YMR269W	YGL147C		YBR093C	YLR286C	YCL041C	YBR093C		YLR367W	YLR286C	YLR286C	YLR367W		YNL244C	YML100W	YPR184W	YNL244C		YPL250W-A	YJR104C	YGR078C				YDL213C	YOR234C				YOL109W	YNL142W				YHR039C-A	YPR143W			YNL017C	YNL142W	YBR296C				YDR055W	YOL123W
YLR154W-B	YER099C	YOR006C	YLR154W-B		YDR373W	YNR049C	YDR116C	YDR373W		YDR500C	YJR127C	YLR116W	YDR500C		YAL025C	YJL133C-A	YAL005C	YAL025C			YNL157W	YCL008C				YNL231C	YPL239W				YPR065W	YLR009W				YLR167W	YDR339C			YAL004W	YDR500C	YLR198C				YER158C	YCR047C
YPL220W	YGR106C	YIL111W	YPL220W		YML004C	YGR202C	YHR143W	YML004C		YIL148W	YPL085W	YER124C	YIL148W		YKL056C	YDR093W	YLR177W	YKL056C			YDL061C	YPR062W				YCL059C	YBR072W				YDR339C	YER126C				YCL058C	YGL029W			YBL053W	YGR069W	YAL062W				YPR036W-A	YNL104C
YOR063W	YER117W	YLR154W-F	YOR063W		YKR042W	YCL041C	YEL053W-A	YKR042W		YOR293W	YER069W	YDR277C	YOR293W		YDR500C	YJL060W	YKR097W	YDR500C			YBR068C	YJL159W				YMR194W	YDR445C				YMR002W	YER006W				YER030W	YDR121W			YMR269W	YER159C	YNL142W				YKL030W	YKL030W
YPL142C	YLR154W-F	YPL142C	YPL142C		YOR063W	YGR082W	YFR036W	YOR063W		YLR076C	YJL153C	YOL155C	YLR076C		YER117W	YML072C	YMR250W	YER117W			YLR055C	YBR068C				YHR052W-A	YLR388W				YDR502C	YDR339C				YOR234C	YBR058C-A			YNL179C	YJL153C	YDR460W				YLR225C	YPR036W-A
YPR035W	YKR042W	YGL158W	YPR035W		YPL273W	YOR331C	YKL185W	YPL273W		YEL003W	YPR125W	YMR086W	YEL003W		YER126C	YJL078C	YMR081C	YER126C			YLR350W	YLR350W				YHR054W-A	YJL122W				YDR500C	YNL036W				YDL061C	YBR162W-A			YPR142C	YLR198C	YDR500C				YDR418W	YLR225C
YML063W	YML062C	YER117W	YML063W		YHL011C	YDR246W	YDR123C	YHL011C		YGL147C	YLR357W	YDL123W	YGL147C		YNL162W	YJR066W	YJR010W	YNL162W			YBL046W	YOL070C				YNL110C	YOR287C				YCL059C	YPR065W				YPL239W	YOR234C				YPR143W	YJL153C				YJL020C	YEL071W
YFL045C	YBR166C	YKR042W	YFL045C		YIL111W	YDR491C	YPL057C	YIL111W		YGL030W	YOR230W	YPL044C	YGL030W		YHR141C	YJR010W	YOR273C	YHR141C			YDL182W	YJR104C				YPL026C	YDL005C				YDR087C	YDR502C				YBR162W-A	YER030W				YKL082C	YDR087C				YPL142C	YER103W
YJL188C	YPL197C	YLR167W	YJL188C		YPL220W	YNL285W	YJL153C	YPL220W		YKR057W	YLR087C	YLR061W	YKR057W		YPR142C	YDR417C	YKL148C	YPR142C			YBL006C	YPR037C				YKL172W	YNL231C				YNL142W	YMR002W				YGL029W	YHR039C-A				YOR226C	YER159C				YBR140C	YDR412W
YNL150W	YLR167W	YNL115C	YNL150W		YPL142C	YOR030W	YER124C	YPL142C		YLR068W	YOL141W	YPL014W	YLR068W		YCL058C	YCR030C	YLR063W	YCL058C			YLR348C	YNL157W				YDR445C	YDL213C				YHR018C	YDR087C				YNL079C	YLR167W				YDR087C	YPR143W				YMR173W	YER006W
YOR332W	YJL188C	YLR104W	YOR332W		YGL031C	YOL005C	YPL183W-A	YGL031C		YOR312C	YOL155C	YJL056C	YOR312C		YKL009W	YDL123W	YPR191W	YKL009W			YMR123W	YBL006C				YBR072W	YPL146C				YPL058C	YCL059C				YHR081W	YOR309C				YDR412W	YLR009W				YJL172W	YER158C
YIL136W	YPR113W	YOR102W	YIL136W		YJL136C	YHR143W	YBR093C	YJL136C		YPR087W	YLR094C	YHR099W	YPR087W		YOR277C	YGL064C	YMR086W	YOR277C			YHR032W	YLR055C				YLR287C-A	YCL059C				YGL103W	YDR500C				YFR033C	YFR033C				YLR009W	YFR036W-A				YKL165C	YPL135W
YDL228C	YOR277C	YLR367W	YDL228C		YGR106C	YKL032C	YOR331C	YGR106C		YPR102C	YAL062W	YKL085W	YPR102C		YGR069W	YKL185W	YLL024C				YOR222W	YHR032W				YOR078W	YNL110C				YHR088W	YPR043W				YMR269W	YHR081W				YDR339C	YDR339C				YDL190C	YHR143W
YLR043C	YPL220W	YDL153C	YLR043C		YKL006W	YGL153W	YDR491C	YKL006W		YGL031C	YKL032C	YOL141W	YGL031C		YKL083W	YHR104W	YLR304C				YKL032C	YOR226C				YOR252W	YHR088W				YER002W	YGL103W				YOR252W	YPL239W				YHR081W	YKL082C				YMR116C	YPR125W
YLR167W	YML001W	YHR096C	YLR167W		YHR063W-A	YPR145W	YLR099C	YHR063W-A		YFL045C	YOL136C	YOL140W	YFL045C		YNL143C	YDR430C	YLR258W				YEL009C	YMR123W				YMR294W-A	YHR052W-A				YNL002C	YHR088W				YLR162W	YLR154W-C				YPR133C	YOR226C				YPL246C	YJR127C
YGL012W	YPL117C	YGR106C	YGL012W		YOR332W	YGL064C	YNR049C	YOR332W		YDR471W	YNR075W	YER069W	YDR471W		YLR198C	YCR088W	YKL103C				YIL154C	YIL154C				YIL079C	YHR054W-A				YPR043W	YER002W				YBR016W	YMR269W				YCL059C	YHR081W				YLR167W	YKR025W
YOR277C	YLR441C	YGL102C	YOR277C		YOR096W	YBR296C	YOL141W	YOR096W		YNL162W	YJL042W	YGL064C	YNL162W		YGR169C-A	YJR137C	YKL085W				YDR040C	YEL009C				YLR009W	YMR194W				YPL146C	YPL146C				YOR309C	YDL061C				YOR056C	YDR412W				YGL195W	YDL153C
YLR075W	YPR098C	YPL197C	YLR075W		YER117W	YMR024W	YGL064C	YER117W		YDL191W	YOR297C	YPL085W	YDL191W		YNR025C	YAR042W	YJL060W				YPL055C	YKL032C				YOR276W	YIL079C				YBR006W	YNL002C				YPR044C	YOR252W				YHR052W-A	YCL059C				YPL032C	YER095W
YOR053W	YGR034W	YML062C			YHL015W	YBR146W	YNL017C	YHL015W		YNL017C	YJR091C	YLR177W	YNL017C		YLR169W	YMR081C	YMR105C				YGL126W	YOR222W				YDR339C	YOR078W				YML130C	YBR006W				YCL059C	YLR221C				YHR054W-A	YBR093C				YKL035W	YPR035W
YGL161C	YGL123W	YJL148W			YLR154W-B	YGL127C	YGR079W	YLR154W-B		YPL090C	YGR054W	YPL240C	YPL090C		YGR280C	YMR250W	YJL078C				YLR154W-E	YMR058W				YGR148C	YDR087C				YDL208W	YDR056C				YEL003W	YCL059C				YFR036W-A	YPR133C				YOL127W	YPR145W
	YGL102C	YER099C			YNL115C	YMR189W	YGR082W	YNL115C		YBR058C-A	YNR049C	YJR137C	YBR058C-A		YNL179C	YLR258W	YHR104W				YPR044C	YDL061C				YDR299W	YPL026C				YPR035W	YPL239W				YBL092W	YOR078W				YLR449W	YOR056C				YHL015W	YER094C
	YGR141W	YBR166C			YNL010W	YNR018W	YPL044C	YNL010W		YER030W	YOL019W	YER147C-A	YER030W		YPR087W	YNL321W	YGR237C				YER150W	YBL046W				YOL077C	YOR252W				YPL239W	YER026C				YGR082W	YDL050C				YPL170W	YHR052W-A				YHR135C	YML014W
	YOR102W	YGR034W			YLR075W	YNR046W	YOL005C	YLR075W		YHR081W	YMR081C	YOR230W	YHR081W		YDR163W	YIL125W	YHR092C				YLR110C	YDL182W				YIL138C	YKL172W				YDR056C	YER158C				YDR092W	YGR146C				YHR143W	YHR054W-A				YGL030W	YEL036C
	YML063W	YBR164C			YDL137W	YLR052W	YOR030W	YDL137W		YGL029W	YJL133C-A	YPR125W	YGL029W		YOL155C	YPL262W	YKL034W				YNL036W	YGL126W				YDL208W	YIL138C				YER158C	YDL208W				YMR123W	YEL003W				YKL172W	YKL172W				YIL148W	YPR156C
	YJL001W	YHR121W			YBR166C	YHR059W	YOR301W	YBR166C		YGR169C-A	YMR136W	YFR030W	YGR169C-A			YOL019W	YJL133C-A				YNL285W	YPL055C				YIL116W	YDL050C				YNL244C	YNL244C				YOR078W	YBR016W				YPL239W	YLR449W				YGL076C	YDR481C
	YBR164C	YPL220W			YEL039C	YNR037C	YGL153W	YEL039C		YML063W	YBL015W	YJR127C	YML063W			YOR141C	YPL085W				YLR154C-G	YPR044C				YHR141C	YLR009W				YER131W	YML130C				YDL213C	YKL122C				YHR088W	YPL170W				YNL312W	YOR306C
	YIL062C	YPL117C			YKR057W	YBL071W-A	YDR246W	YKR057W		YML026C	YJL084C	YLR357W	YML026C			YKL148C	YFR019W				YDR384C	YBR016W				YMR002W	YIL116W				YKL172W	YKL172W				YHR052W-A	YMR123W				YCR087W	YHR088W				YML124C	YHR039C-A
	YGL030W	YLR154C-G			YGL161C	YHL016C	YDR445C	YGL161C		YBL077W	YOR035C	YOL019W	YBL077W			YDR122W	YFL034C-B				YBR016W	YLR110C				YDL050C	YHR141C				YOL077C	YER131W				YHR054W-A	YNL079C				YAL025C	YPL239W				YNL138W	YGL195W
	YPL206C	YLR441C			YBR164C	YOL141W	YPR145W	YBR164C		YOL127W	YAL021C	YMR081C	YOL127W			YKL103C	YML072C				YJL152W	YJL152W				YGL189C	YLR287C-A				YKL009W	YPR035W				YML026C	YDR019C				YCR083W	YLR221C				YOR182C	YJL172W
	YHR096C	YOL129W			YDL236W	YOL073C	YBR105C	YDL236W		YIL052C	YOR221C	YJL212C	YIL052C			YJR117W	YOR230W				YGR164W	YDR384C				YGL255W	YMR294W-A				YER055C	YGR079W				YCR087W	YDL213C				YLR221C	YHR143W				YDR155C	YDR418W
	YAL037C-B	YGL156W			YPR113W	YLR356W	YBL071W-A	YPR113W		YGR063C	YOR374W	YMR170C	YGR063C			YLR357W	YCR012W				YLR162W	YLR076C				YPR102C	YIL063C				YCR087W	YKL082C				YNL232W	YDR092W				YMR123W	YAL025C				YDL022W	YHR135C
	YDL007W	YPR113W			YGL012W	YBR105C	YHL016C	YGL012W		YGR271C-A	YHL004W	YPR013C	YGR271C-A			YAL017W	YJL052W				YGR069W	YDR278C				YLR325C	YFR033C				YER048C	YOR344C				YDR408C	YPR044C				YNL232W	YLR062C				YBL045C	YKL035W
	YLL039C	YGL123W			YLR251W	YNL104C	YLR061W			YDL075W	YCR093W	YER070W	YDL075W			YOR047C	YDR093W				YNL143C	YGR069W				YMR189W	YMR189W				YOR276W	YOL077C				YHR141C	YJL011C				YFR001W	YCR083W				YPR044C	YPL032C
	YPR062W	YGL030W			YFL014W	YMR183C	YGR202C			YGL103W	YLR439W	YBL015W	YGL103W			YJR091C	YCR030C					YLR154W-E				YHR066W	YDR339C				YER026C	YOR276W				YKL122C	YLR162W				YPL094C	YOR078W				YLR388W	YML124C
	YBR256C	YDL222C				YMR043W	YNR037C			YPL237W	YLR450W	YLR094C	YPL237W			YDR150W	YDR417C					YDR445C				YDR083W	YOR306C				YGR079W	YLR225C				YJL011C	YHR141C				YDL061C	YMR123W				YGL088W	YIL148W
	YOR312C	YML001W				YGL222C	YMR024W			YGL123W	YMR231W	YPR043W	YGL123W			YML075C	YCR088W					YNL143C				YOL041C	YKL082C				YHR052W	YKL009W				YPR102C	YML026C				YBR247C	YCR087W				YHR094C	YHL015W
	YKL033W-A	YDR322C-A				YJL184W	YER091C			YDR322C-A	YAL012W	YGR160W	YDR322C-A			YAL021C	YGL064C					YLR154C-G				YDR471W	YOR276W				YLR225C	YOR234C				YOR226C	YGR082W				YOR078W	YBR247C				YGL037C	YOL127W
	YDL153C	YKL033W-A				YOR226C	YGL127C			YKR094C	YBR115C	YGR204W	YKR094C			YBR140C	YDL123W					YLR162W				YBL092W	YGL255W				YKL082C	YER048C				YPL094C	YCR016W				YIL127C	YFR001W				YER070W	YHR094C
	YJR073C	YHR141C				YDL123W	YNR018W			YJR123W	YPR043W	YLR087C	YJR123W			YNR067C	YER091C					YNL017C				YNR003C	YDR299W				YEL051W	YCR087W				YJL188C	YBL092W				YLR185W	YLR185W				YMR072W	YGL076C
	YHR141C	YJR073C				YBR016W	YMR189W			YLR198C	YBR136W	YJL042W				YGR160W	YPR160W					YNL285W				YNL002C	YIL127C				YOR234C	YEL051W				YEL034C-A	YCR087W				YNL143C	YNL232W				YDR382W	YIL123W
	YDR051C	YGR141W				YER034W	YKL032C			YGR228W	YGR160W	YNR075W				YJL076W	YKL185W					YGR164W				YER002W	YOR195W				YOR344C	YNL110C				YCR016W	YHR088W				YDL182W	YIL127C				YPL198W	YBL045C
	YPR020W	YML063W				YMR036C	YBR146W			YNR025C	YGR204W	YLR378C				YER070W	YGR160W					YMR011W				YEL034C-A	YNR054C				YMR295C	YPR133C				YIL008W	YDR087C				YAL013W	YPL094C				YLR076C	YKL203C
	YOL129W	YPR098C				YML052W	YOL019W			YOR053W	YJL076W	YGR054W				YPR091C	YOL019W					YLR062C				YOR198C	YMR002W				YPR125W	YER055C				YER019C-A	YDL121C				YMR197C	YDL061C				YDL029W	YMR072W
	YLR154C-G	YBR256C				YKL138C	YLR052W			YCR096C	YLR099C	YDR093W				YDR457W	YCR093W					YLR061W				YOR344C	YEL034C-A				YER100W	YPR125W				YLR154W-C	YOR056C				YKL122C	YAL013W				YCR012W	YGL030W
	YGR088W	YDR051C				YGR079W	YNR046W			YER158W-A	YPR091C	YKL032C				YDL237W	YPL262W									YLR003C	YPR102C				YPR133C	YMR295C				YLR221C	YDR408C				YPR062W	YKL122C				YKL153W	YER070W
	YJL148W	YIL062C				YAL039C	YLR356W			YHR219W	YKL204W	YLR304C				YBL007C	YNL321W									YIL127C	YOR198C				YNL110C	YHR052W				YKL156W	YNL232W				YPR065W	YDL182W				YHR141C	YGL088W
	YKL006W	YPR020W				YLR390W	YNL104C			YJL202C	YJR010W	YOR374W				YOR191W	YJR137C									YKL009W	YOL077C				YHR170W	YER100W				YLR003C	YHR052W-A				YDR056C	YDR045C				YJL052W	YOR182C
	YDL222C	YDR342C				YOR221C	YHR059W			YKL076C	YNL239W	YJL084C				YOR290C	YJR066W									YPL249C-A	YOR344C				YNL061W	YHR066W				YPR133C	YHR054W-A				YBL093C	YMR197C				YKL203C	YPL198W
	YKL163W	YGR088W				YPL014W	YDL123W			YLR169W	YLR356W	YMR136W				YPR160W	YJL172W									YER131W	YGR280C				YHR066W	YHR039C-A				YBR084C-A	YHR187W				YER127W	YFR033C				YML004C	YDR382W
	YGL156W	YPL206C				YOR047C	YMR183C			YLL009C	YHL016C	YOL136C				YNR075W	YIL125W									YGR280C	YGR148C				YDR361C	YDR361C				YDR019C	YER019C-A				YOL058W	YBL093C				YPR191W	YML004C
	YIL101C	YPR062W				YOL019W	YLR390W			YDR374W-A	YOR081C	YOR297C				YMR189W	YDR430C									YNL096C	YDL208W				YDR002W	YHR170W				YOR056C	YIL008W				YER002W	YIL008W				YIR038C	YCR012W
	YGR209C	YKL163W				YDR121W	YER034W			YDR163W	YMR181C	YJR010W				YJL042W	YAR042W									YNL061W	YHR066W				YOR004W	YNL061W				YJR072C	YOR226C				YGR202C	YPR065W				YOR086C	YDL029W
	YBL040C	YOR293W				YOL027C	YOL073C			YGR069W	YNL104C	YLL040C				YOL081W	YLR378C									YBR084C-A	YLR003C				YCL025C	YDR002W				YLR449W	YJL188C				YFR033C	YDR056C				YGR192C	YOR086C
	YHR121W	YOR312C				YML112W	YPL014W			YEL039C	YLR063W	YNR049C				YJL172W	YDR122W									YPL243W	YDR056C				YLR276C	YPL057C				YNL110C	YPL094C				YGL058W	YPR062W				YGL135W	YPR191W
	YGL158W	YGR063C				YGL058W	YBL032W			YGR182C	YIR006C	YLR180W				YMR109W	YCR061W									YIR004W	YOL041C				YLR062C	YOR004W				YOR216C	YOR216C				YER006W	YBR089C-A				YOL155C	YPR044C
	YGR232W	YLR262C-A				YFR055W	YLL024C			YDR281C	YPR138C	YIR006C				YBR214W	YOL141W									YPR133C	YIR004W				YEL034C-A	YLR276C				YKL082C	YPR133C				YLR162W	YER002W				YAL005C	YJR066W
	YPL090C	YHL015W				YLR357W	YPR157W			YJR087W	YLR304C	YKL148C				YPL084W	YAL017W									YKL082C	YPR133C				YKR039W	YEL034C-A				YDR152W	YHR138C				YJR072C	YER127W				YJR066W	YDL125C
	YHL015W	YDL007W				YPR157W	YBR016W			YCR097W	YBR108W	YGL209W				YKL215C	YBL007C									YGR082W	YGL189C				YNL175C	YPL265W				YLR438C-A	YNL110C				YIL008W	YBR290W				YMR196W	YOL155C
	YLR043C	YOR253W				YCR083W	YMR081C			YCR024C-B	YML072C	YMR231W				YGR080W	YLR357W									YDR056C	YLR325C				YPR145W	YCL025C				YIR004W	YPR102C				YML074C	YLR162W				YDR507C	YLR076C
	YDR342C	YER074W-A				YBR269C	YKL138C			YLR251W	YOR141C	YHL016C				YNL262W	YGL209W									YML026C	YNR003C				YPL093W	YAL062W				YFR001W	YLR003C				YDR045C	YOR252W				YGR270W	YJL052W
	YIL108W	YBL040C				YER068W	YJL184W				YPL262W	YJL133C-A				YKL157W	YJR117W									YAR002C-A	YER002W				YOR206W	YNL175C				YDR056C	YKL082C				YBR089C-A	YJR072C				YIL052C	YGL135W
	YML004C	YJL001W				YHR036W	YFR055W				YGR136W	YPL262W				YJL084C	YML075C									YDL121C	YDR083W				YIL118W	YIL118W				YER131W	YCR083W				YPL146C	YOR309C				YBL003C	YLR388W
	YOR332W	YKL006W				YOR032C	YPR013C				YLR139C	YML072C				YLR094C	YOR141C									YMR183C	YLR276C				YHR039C-A	YPR145W				YMR197C	YGR115C				YLR062C	YPL146C				YGR088W	YHR141C
	YOR293W	YLR043C				YOR141C	YDR156W				YDR143C	YJR091C				YML110C	YMR196W									YOR195W	YML026C				YLR186W	YER127W				YAL025C	YEL034C-A				YOR252W	YLR052W				YPL127C	YGR192C
	YNL157W	YLL039C				YKL095W	YDL023C				YKL022C	YCR093W				YOR065W	YBL015W									YDR382W	YLR167W				YER127W	YHR169W				YKL009W	YOR277C				YLR052W	YOL058W				YLL040C	YMR196W
	YMR311C	YMR311C				YDL155W	YGL222C				YBR093C	YNL104C				YDR491C	YKL215C									YLR309C	YNL002C				YHR169W	YOR226C				YDR025W	YKL156W				YBR290W	YGL058W				YOR383C	YKL153W
	YHL017W	YNL157W				YGR049W	YOR221C				YMR109W	YAL021C				YOL136C	YAL021C									YJL140W	YDR471W				YER171W	YPL093W				YIL127C	YNL081C				YPR125W	YER006W				YLR043C	YGR270W
	YML067C	YIL101C				YDR156W	YOL155C				YOR201C	YDR417C				YER091C	YDR491C									YMR260C	YMR039C				YER133W	YOR206W				YOR276W	YFR001W				YPL265W	YGR202C				YML128C	YDR507C
	YER074W-A	YOR283W				YMR123W	YGL058W				YPR032W	YBR115C				YJL005W	YJL084C									YGL031C	YPL249C-A				YOR226C	YER171W				YMR194W	YIL127C				YER126C	YML074C				YBR072W	YAL005C
	YDR322C-A	YGR232W				YAL012W	YLR172C				YNL236W	YOR035C				YMR140W	YHR163W									YBR048W	YBL092W				YOL010W	YLR186W				YER029C	YBR290W				YOR262W	YOR262W				YFL014W	YPL127C
	YOL062C	YGR209C				YLR172C	YOR226C				YLR180W	YLR439W				YNL241C	YJR091C									YHR063W-A	YCR087W				YAL062W	YPR036W-A				YDR087C	YLR009W				YKL030W	YPR125W				YPR028W	YBL003C
	YJR123W	YHR138C				YOL136C	YGR146C				YKL138C	YDR055W				YGL197W	YOR065W									YER048C	YPR052C				YBR247C	YLR121C				YKL172W	YER029C				YKR025W	YHR018C				YPL036W	YLL040C
	YER009W	YLR175W				YDR462W	YLR180W				YML099C	YOR221C				YLL044W	YNL241C									YPR060C	YER131W				YLR121C	YBR247C				YOL077C	YJR072C				YHR170W	YOL077C				YDL223C	YMR250W
	YGR063C	YPL090C				YJL153C	YMR036C				YGL209W	YDR123C				YPL246C	YPR091C									YDR361C	YDL121C				YDR083W	YOL010W				YBL072C	YLR438C-A				YGR253C	YER126C				YHR096C	YLR043C
	YIL148W	YDR373W				YBL032W	YMR043W				YNR019W	YAL012W				YBL015W	YGL197W									YOL022C	YOR338W				YOL027C	YDR083W				YKL214C	YLR449W				YOL077C	YPL265W					YFL014W
	YKR088C	YDL050C				YEL015W	YML112W				YIR023W	YJL076W				YIR006C	YLR286C									YLR406C	YKL009W				YER095W	YKL099C				YPL146C	YMR197C				YMR014W	YHR170W					YML128C
	YDL125C	YNL244C				YHR182W	YDR121W				YPL089C	YLR303W				YNL315C	YDL237W									YPR052C	YGR082W				YER035W	YOL027C				YOR367W	YDR152W				YLR276C	YKR025W					YPL036W
	YCR017C	YKR068C				YDL117W	YDR502C				YDR417C	YLR450W				YLR305C	YDR150W									YOR306C	YBR084C-A				YKL099C	YER133W				YNR003C	YDR056C				YNR054C	YPL057C					YOR383C
	YBL011W	YBL036C				YHL031C	YAL039C				YDR530C	YGR136W				YCR061W	YLR094C									YDR158W	YPL243W				YER103W	YGR082W				YHL013C	YAL025C				YKL009W	YMR014W					YDR039C
	YOR283W	YOL062C				YMR081C	YLR357W				YPR124W	YIL125W				YOL141W	YJL076W									YPL094C	YNL061W				YER082C	YER035W				YPL199C	YOR367W				YDR225W	YFR032C-A					YBR072W
	YOR253W	YMR230W				YER091C	YPL068C				YOR066W	YLR356W				YLR106C	YOR047C									YOR338W	YNL096C				YPL266W	YLR449W				YER127W	YPL146C				YBL054W	YKL030W					YGR088W
	YJR094W-A	YBL011W				YOR301W	YDL155W				YBR003W	YPR138C				YDL086W	YMR189W									YGR208W	YLR309C				YPL111W	YGR019W				YDR471W	YBR084C-A				YMR039C	YGR253C					YPR028W
	YKR068C	YHR081W				YLR061W	YHL031C				YPL137C	YLR099C				YLR116W	YMR140W									YLL011W	YBR048W				YPL057C	YOR056C				YLR022C	YIR004W				YOR309C	YNR054C					YHR096C
	YBR004C	YGR024C				YHR215W	YMR123W				YOR191W	YHL004W				YNL139C	YMR122W-A									YHR052W	YIL083C				YOR056C	YKR039W				YAL003W	YKL172W				YHR018C	YLR276C					YDL223C
	YOR002W	YML067C				YDL061C	YOR047C				YPL068C	YPL068C				YPL115C	YGR080W									YDR408C	YJL140W				YGR082W	YER095W				YBR290W	YKL214C				YGR079W	YBL054W
	YDR373W	YHR010W				YGL043W	YKL095W				YIL125W	YBR208C				YKL203C	YJL042W									YDL100C	YLR435W				YEL040W	YER103W				YDR460W	YPL199C				YDR152W	YDR225W
	YBR302C	YKL067W				YPL044C	YLR094C				YOR027W	YMR181C				YOR085W	YBR241C									YLR435W	YDR361C				YER156C	YPL266W				YLR181C	YOR287C				YNL175C	YLR154W-C
	YML132W	YJR123W				YGR146C	YCR083W				YLL028W	YMR109W				YMR012W	YLR116W									YDR002W	YDR527W				YLR449W	YOR052C				YPR188C	YDL002C				YOL144W	YGR079W
	YDR447C	YIL108W				YPR013C	YER068W				YAR042W	YBR238C				YLL031C	YNR075W									YGR001C	YGR081C				YER072W	YER082C				YLR009W	YCR003W				YML026C	YKL009W
	YDR384C	YIL148W				YMR268C	YOL027C				YHL021C	YBR136W				YOR066W	YKL157W									YEL051W	YAR002C-A				YER094C	YBL054W				YBR048W	YMR194W				YGR245C	YMR039C
	YMR269W	YKR088C				YLR094C	YHR215W				YJL005W	YPR091C				YLR207W	YDR457W									YGR118W	YMR183C				YER148W	YPL111W				YMR002W	YOL077C				YKR097W	YER030W
	YFL034C-A	YDR447C				YDR092W	YAL012W				YKL157W	YNL239W				YML120C	YIR006C									YAL003W	YHR063W-A				YGR019W	YLR388W				YBR267W	YDR460W				YER146W	YDL213C
	YFR004W	YDL137W				YAL032C	YOR032C				YJL060W	YLR063W				YDR141C	YBR140C									YPL266W	YDL074C				YKR081C	YPL143W				YBL071W-A	YLR181C				YFR032C-A	YOL144W
	YBL036C	YDR384C				YFL034C-B	YOL136C				YBR238C	YKL204W				YGL137W	YNL262W									YHR170W	YIL119C				YBL054W	YGR280C				YDR158W	YBL071W-A				YER030W	YNL175C
	YNL162W	YOR332W				YGL035C	YHR182W				YJR019C	YCR088W				YDR044W	YBR214W									YMR142C	YLR406C				YPL043W	YEL040W				YLR276C	YER131W				YOR287C	YDR083W
	YHR010W	YNL200C				YNL185C	YBR269C				YHR102W	YOR081C				YBR202W	YDR127W									YBR039W	YDR152W				YER057C	YER037W				YGR115C	YKL009W				YOR338W	YML026C
	YMR230W	YCR017C				YJL065C	YGR049W				YLR378C	YPL137C				YDR127W	YJL005W									YNL121C	YER048C				YLR388W	YER156C				YJL190C	YOR276W				YOL027C	YDR152W
	YPL053C	YPL237W				YJR111C	YJR111C				YLR187W	YBL099W				YCR012W	YOR290C									YGR005C	YOL027C				YPL143W	YER094C				YCR003W	YER159C				YDR083W	YKL143W
	YDL067C	YDL191W				YDR405W	YLR116W				YPL231W	YNR019W				YJL062W	YOL136C									YDR226W	YPR060C				YOL041C	YER148W				YER159C	YNR003C				YMR002W	YDL121C
	YHR012W	YML004C				YPR035W	YDL117W				YJR033C	YOR027W				YPL082C	YML110C									YOR206W	YDR382W				YKL156W	YER072W				YNR046W	YHL013C				YKL143W	YGR245C
	YKL067W	YER009W				YMR086W	YOR141C				YGL137W	YDL182W				YDR074W	YER003C									YGR180C	YGR208W				YPL265W	YOL041C				YFR036W-A	YGR169C-A				YDL148C	YNL180C
	YIL110W	YFR004W				YGR004W	YDR462W				YMR024W	YLR139C				YPL231W	YOR085W									YMR072W	YMR260C				YDR035W	YKR081C				YOR287C	YER127W				YDL213C	YOR287C
	YPL237W	YDL125C				YGL122C	YHR036W				YML078W	YBR108W				YOR027W	YOL081W									YMR173W	YOL022C				YER081W	YER057C				YNL096C	YLR022C				YPR145W	YDL148C
	YLR166C	YBR004C				YDL012C	YEL015W				YCR088W	YKL157W				YDL022W	YKL035W									YBL001C	YDL100C				YER037W	YPL043W				YLL011W	YLR276C				YMR146C	YKR097W
	YDL191W	YBR302C				YLR185W	YBR267W				YDL195W	YGL137W				YNL102W	YPL115C									YPR148C	YPL094C				YLL011W	YKL156W				YGR275W	YPR188C				YNL061W	YLR003C
	YBR052C	YML132W				YDR445C	YPL116W				YLR260W	YDL195W				YMR129W	YDR502C									YPL043W	YEL051W				YJR063W	YDL020C				YMR183C	YBR247C				YKR039W	YER146W
	YHR016C	YDR284C				YPL068C	YDR417C				YBL047C	YPL231W				YDL040C	YNL315C									YPL225W	YDR408C				YLR197W	YOL123W				YER146W	YIL063C				YNR046W	YOR338W
	YLR175W	YJR010C-A				YMR146C	YAL032C				YOR299W	YML078W				YER166W	YBL099W									YML106W	YMR033W				YOR272W	YBR105C				YBR247C	YDR025W				YJL078C	YCR016W
	YGL091C	YHL017W				YKL052C	YFL034C-B				YOL073C	YBR093C				YGL065C	YMR109W									YCL050C	YKL099C				YER062C	YDR035W				YOR272W	YBR269C				YLR003C	YMR028W
	YDL050C	YDL067C				YDR417C	YDR405W				YPR184W	YDR143C				YJR065C	YOR191W									YML074C	YGL031C				YDL020C	YLR185W				YHR138C	YLR142W				YMR295C	YJL078C
	YKR026C	YJR094W-A				YHR192W	YGL035C				YBR206W	YOR201C				YLR439W	YBR202W									YLR449W	YBL001C				YMR014W	YMR014W				YIL019W	YBL072C				YDR021W	YNL061W
	YLR348C	YHR016C				YNL017C	YDL061C				YOR047C	YJL060W				YHR163W	YNL045W									YNL244C	YGR001C				YER122C	YDR225W				YDR002W	YDL005C				YMR028W	YDR021W
	YDL137W	YFL034C-A				YDL131W	YOR272W				YMR129W	YLR259C				YBL045C	YML120C									YAL025C	YDR158W				YMR146C	YDL100C				YDR083W	YIL131C				YNL180C	YGR161C
	YJR001W	YPR187W				YAL003W	YNR054C				YBR205W	YKL138C				YMR196W	YJL062W									YIL119C	YOR056C				YGL078C	YOR272W				YGL103W	YBR267W				YDL121C	YDR365C
	YAL008W	YNL162W				YBR267W	YDL012C				YLR207W	YBR221C				YBR205W	YPL084W									YDR365C	YMR072W				YGR280C	YJR063W				YGR214W	YFR036W-A				YKR081C	YOL027C
	YDR177W	YOR002W				YNL036W	YGL043W				YLR120C	YHL021C				YKL204W	YGR204W									YLR333C	YLR449W				YER068W	YLL011W				YBR269C	YLR435W				YOR272W	YOR272W
	YKL002W	YLR348C				YLR180W	YLR185W				YBR177C	YNL236W				YML078W	YLL044W									YER126C	YHR052W				YDR060W	YDR497C				YDL075W	YMR002W				YBR084C-A	YNR046W
	YKL046C	YFL045C				YOL155C	YGL122C				YLR410W	YOR141C				YBR241C	YGL137W									YBL072C	YDR002W				YDR225W	YER081W				YLR435W	YLR018C				YPR056W	YKR081C
	YNR061C	YJR001W				YPL159C	YJL065C				YPR145W	YDR530C				YNL045W	YER119C									YJL188C	YLL011W				YCL054W	YER122C				YPR052C	YDR471W				YDR365C	YNL215W
	YML128C	YHR012W				YOR107W	YPR035W				YGR227W	YJL005W				YPL259C	YPL246C									YOR056C	YGR005C				YPL019C	YER068W				YNR054C	YNL180C				YCR016W	YBR084C-A
	YGR024C	YDR177W				YLR116W	YAL003W				YNR018W	YPR184W				YOR155C	YDL195W									YPL019C	YBR039W				YLR185W	YMR194W				YIL096C	YJL189W				YNL002C	YMR002W
	YJR010C-A	YIL110W				YIL044C	YIL053W				YNL321W	YPR124W				YHR186C	YLL031C									YOR272W	YDR071C				YBR029C	YER062C				YBR173C	YGR072W				YDR025W	YPR056W
	YGL012W	YGL147C				YJR019C	YDR092W				YGL125W	YKL104C				YBL099W	YOR027W									YDL136W	YNL175C				YMR194W	YCL054W				YGL147C	YGR275W				YLR051C	YNL002C
	YEL027W	YKL046C				YDL088C	YOR107W				YDL048C	YIR023W				YPL068C	YDL171C									YDR092W	YPL225W				YDL100C	YBR029C				YKR006C	YIL096C				YNL215W	YMR295C
	YJR051W	YLR166C				YGR002C	YOR135C				YLR299W	YML099C				YDR238C	YBL045C									YPR125W	YAL003W				YJL010C	YDR060W				YER002W	YBR048W				YPL057C	YLR435W
	YDR284C	YAL008W				YER147C-A	YMR268C				YLR380W	YOL059W				YAL051W	YLR305C									YGR085C	YPL199C				YBR105C	YMR146C				YJL189W	YDR363W-A				YLR018C	YPR145W
	YKL174C	YKR070W				YIL050W	YNL185C				YPL221W	YBR003W				YJL121C	YLR106C									YMR121C	YDR092W				YER012W	YLR197W				YPL057C	YNR046W				YHR169W	YLR051C
	YCL011C	YDR399W				YIL053W	YBR247C				YOL059W	YBR206W				YPR032W	YPL231W									YIL118W	YMR173W				YKL143W	YER012W				YJL009W	YDR083W				YGR082W	YMR146C
	YGL147C	YOR089C				YGR239C	YER147C-A				YKL062W	YPR145W				YOR132W	YDR141C									YGR083C	YNL121C				YOL123W	YKL143W				YGL189C	YIL019W				YGR145W	YER131W
	YOR063W	YDL212W				YDL202W	YMR086W				YLR259C	YBL047C				YGR204W	YNL102W									YDR372C	YPL266W				YPR036W-A	YGL078C				YPR148C	YNL050C				YDL005C	YHR169W
	YPR086W	YGL091C				YAR002W	YKL052C				YMR162C	YNL321W				YJL020C	YMR012W									YLR448W	YGR118W				YLR180W	YDR194C				YJL140W	YDR412W				YER131W	YDR025W
	YHL011C	YGL012W				YDR025W	YMR146C				YPL049C	YPR032W				YMR024W	YKL203C									YOL010W	YMR142C				YDR194C	YJL010C				YHR143W	YBR173C				YDR280W	YDR312W
	YMR251W-A	YJR051W				YBL006C	YGR204W				YCR046C	YHR102W				YHL004W	YDL086W									YPL199C	YLR018C				YDR365C	YPL094C				YDR225W	YAL003W				YOL123W	YNL110C
	YOL139C	YKL002W				YDR502C	YDL131W				YOR171C	YKL022C				YCL057W	YCL057W									YGR246C	YPR148C				YER007C-A	YDR365C				YMR142C	YNR054C				YJL148W	YDL005C
	YLR093C	YML128C				YCL049C	YBR079C				YMR080C	YOR191W				YOR201C	YDL022W									YMR242C	YOR051C				YOR051C	YPL019C				YNL050C	YGR271C-A				YDR312W	YLR018C
	YJL123C	YJL004C				YOR135C	YGR004W				YNR033W	YOR066W				YER119C	YPL068C									YKL156W	YNL244C				YBR082C	YER007C-A				YLR325C	YOR272W				YLR154W-C	YBR016W
	YKR070W	YKR057W				YBR079C	YPL159C				YPL226W	YER119C				YLR058C	YML078W									YLR257W	YLR025W				YLR002C	YOR051C				YDR412W	YJL009W				YLR435W	YGR280C
	YKR057W	YEL027W				YPL132W	YPL212C				YKL104C	YJR033C				YBR086C	YER166W									YDL051W	YER126C				YOL022C	YGR164W				YLR018C	YMR161W				YBR016W	YNL079C
	YDR399W	YBR052C				YGR078C	YHR192W				YGL197W	YAR042W				YLR286C	YBR086C									YDL148C	YHR170W				YPL094C	YLR180W				YGR072W	YER146W				YOR110W	YDR184C
	YFL045C	YBR242W				YML114C	YDL049C				YNL282W	YPL089C				YIL005W	YJL121C									YJL010C	YAL025C				YER036C	YBR082C				YML030W	YMR183C				YEL051W	YGR145W
	YOR167C	YPL053C				YHL004W	YJR019C				YBR146W	YDL048C				YBR139W	YLR439W									YLR195C	YJL054W				YPL243W	YOL022C				YBL027W	YML053C				YNL079C	YGR082W
	YBR181C	YLR093C				YDR143C	YIL044C				YMR012W	YLL028W				YIR036C	YJL020C									YNL175C	YML106W				YDL148C	YPL243W				YEL051W	YJL190C				YFL038C	YDR280W
	YJL004C	YBR181C				YPL232W	YAR002W				YPL115C	YLR120C				YGL173C	YGL065C									YKR081C	YCL050C				YOR294W	YLR002C				YGR271C-A	YPR052C				YGR280C	YOR110W
	YJR024C	YOR021C				YIR023W	YPR036W-A				YPL084W	YLR380W				YMR080C	YOR066W									YPL093W	YDR226W				YDR497C	YDL148C				YKL096W-A	YKL099C				YAL003W	YKR039W
	YOR362C	YAL025C				YIL041W	YGR112W				YNL054W	YPL226W				YNL271C	YDR074W									YDL075W	YLR333C				YNR018W	YGR187C				YPR087W	YOL005C				YOR306C	YJL148W
	YPL184C	YKL174C				YBR002C	YLR154W-E				YHR215W	YLR410W				YOR336W	YJR065C									YOR294W	YDL051W				YGR145W	YNL232W				YLR395C	YLL011W				YOR276W	YHL013C
	YOL061W	YKR026C				YJL062W-A	YGR078C				YBL099W	YNR018W				YDR239C	YLR207W									YBR247C	YNL113W				YGR187C	YMR290C				YNL180C	YBR157C				YOR004W	YOL123W
	YCR077C	YKL151C				YDL040C	YPL132W				YLR413W	YLR260W				YBL032W	YPL082C									YDL201W	YOR206W				YMR290C	YER036C				YLR243W	YKR006C				YML014W	YNL292W
	YOR061W	YBR024W				YMR002W	YGR239C				YBR221C	YMR012W				YJR138W	YIR036C									YDL122W	YPR125W				YOR052C	YOR294W				YIL138C	YNR050C				YNL110C	YAL003W
	YJR105W	YEL009C				YDR054C	YGR002C				YDR330W	YBL007C				YKL192C	YDR044W									YDR177W	YOL010W				YGR103W	YGR145W				YIL131C	YDR527W				YKL120W	YOR004W
	YGR074W	YJR024C				YNL311C	YDL088C				YDL086W	YAL023C				YDR322W	YNL139C									YIL052C	YBR247C				YML106W	YNR018W				YOR293W	YNL096C				YNL292W	YML014W
	YJL048C	YIL103W				YOR272W	YDR143C				YDR422C	YLR413W				YGL092W	YMR205C									YGL135W	YGR246C				YNL232W	YML106W				YDL148C	YMR039C				YLL011W	YDR361C
	YML024W	YBR159W				YOR250C	YDR025W				YJR109C	YGL197W				YNR031C	YFL039C									YER100W	YMR121C				YDL051W	YJL148W				YER126C	YDR158W				YBR082C	YLL011W
	YLR447C	YOL139C				YPR036W-A	YGR136W				YOR290C	YNL241C				YML128C	YBL032W									YDR060W	YLR257W				YJL148W	YAL025C				YPR187W	YER002W				YDR002W	YGL169W
	YOR089C	YIL040W				YNR054C	YLR437C				YCR030C	YGR211W				YHR008C	YLR058C									YGL043W	YPL043W				YGL189C	YDL051W				YBR279W	YGL103W				YHL013C	YEL051W
	YNL244C	YMR251W-A				YDR527W	YIL050W				YAL017W	YBR177C				YPL183W-A	YDL040C									YOL144W	YML074C				YPL211W	YGL189C				YDR299W	YPL057C				YPL093W	YOR306C
	YNL200C	YNR061C				YDL049C	YHR169W				YPL173W	YLR299W				YHR102W	YBR139W									YKL143W	YDR365C				YDR055W	YHR063W-A				YCR031C	YPR087W				YGL169W	YML053C
	YKL151C	YLR337C				YNL131W	YBL024W				YJR045C	YMR080C				YLR413W	YLR179C									YGR020C	YGR180C				YHR063W-A	YDR299W				YOR202W	YML030W				YGR161C	YOR276W
	YEL009C	YML024W				YCL037C	YDL202W				YNR011C	YJR045C				YOR153W	YBR205W									YHL015W	YBL093C				YGR164W	YPL211W				YML074C	YDR002W				YER158C	YDR002W
	YBR024W	YOR167C				YBR039W	YBL006C				YBL007C	YOR299W				YJL080C	YML085C									YDR245W	YNR039C				YEL063C	YGR103W				YOR131C	YOL077W-A				YLR175W	YKL120W
	YDL212W	YOR063W				YJL063C	YPL232W				YGR097W	YGL125W				YBR115C	YGL173C									YJL145W	YBL072C				YAL025C	YMR260C				YGR005C	YNL252C				YKL099C	YBR082C
	YPR069C	YPR086W				YGL219C	YDR158W				YAL039C	YDR156W				YBL017C	YHR186C									YLR022C	YDR372C				YDR299W	YDR372C				YHR066W	YJL140W				YER055C	YBR122C
	YCR061W	YPL184C				YGR136W	YOR250C				YDL182W	YBR205W				YGL206C	YOR155C									YGR187C	YJL010C				YLR175W	YLR175W				YGL058W	YDR225W				YDR184C	YPL093W
	YPL010W	YPL225W				YPL212C	YDR527W				YDR347W	YGR227W				YLR179C	YGR136W									YLR029C	YKL028W				YNL220W	YEL063C				YPL037C	YDL075W				YEL034C-A	YFL038C
	YLR337C	YHL011C				YBR247C	YIR023W				YOR090C	YPL221W				YPL089C	YJR121W									YML105C	YOR272W				YMR260C	YDR445C				YBL093C	YLR395C				YDR361C	YKL099C
	YGR101W	YBR096W				YOL040C	YLR058C				YDR017C	YJL159W				YLL026W	YOR201C									YNL131W	YGR083C				YER091C	YGR253C				YNL153C	YBR279W				YCL054W	YGR275W
	YPR187W	YPL010W				YLR058C	YNL310C				YGR237C	YMR205C				YGR136W	YAL038W									YDR071C	YIL118W				YKR071C	YBR034C				YOL041C	YGR214W				YPL181W	YER158C
	YCL001W	YLR034C				YDL023C	YJL062W-A				YLR305C	YMR024W				YNR030W	YAL051W									YLR186W	YDL136W				YPL212C	YKR071C				YKR094C	YNL175C				YKL040C	YLR175W
	YDL228C	YDR272W				YLR437C	YHR070W				YKL155C	YCR046C				YNL055C	YOR132W									YJL054W	YBR279W				YER049W	YPL212C				YBL001C	YAL059W				YBR122C	YCL054W
	YHR081W	YDL136W				YHR187W	YJL063C				YPR040W	YJR019C				YML059C	YKL204W									YKR071C	YKL156W				YDR372C	YNL220W				YNR050C	YPL213W				YDL207W	YKL040C
	YNL323W	YGR074W				YLR380W	YNL191W				YFR051C	YER166W				YJR121W	YLR303W									YJR072C	YOL144W				YBR034C	YGR083C				YBR066C	YPL227C				YGL101W	YGL101W
	YDL236W	YGL068W				YER183C	YDL040C				YBR214W	YPL115C				YNL134C	YPL259C									YGR158C	YNL059C				YDL031W	YER049W				YHR170W	YER126C				YIL118W	YER055C
	YJL079C	YDR167W				YHR070W	YML053C				YER166W	YNL282W				YIL056W	YDR238C									YPL143W	YNL166C				YML074C	YML074C				YNL231C	YHR143W				YDR158W	YHR187W
	YBR096W	YJL048C				YLL010C	YOL040C				YFL034C-B	YDR038C				YBR039W	YKL192C									YDR399W	YMR014W				YGR253C	YJL188C				YDR382W	YDR184C				YDL153C	YEL034C-A
	YOR161C	YCL001W				YBR055C	YLR380W				YOR113W	YMR129W				YDR039C	YMR129W									YBL027W	YOR232W				YGR118W	YDL031W				YMR146C	YOR075W				YBR066C	YGR152C
	YIL103W	YPR188C				YPL116W	YMR002W				YLR397C	YML075C				YBL047C	YHR008C									YPL145C	YDL148C				YGR083C	YOL064C				YNL175C	YAL030W				YGR275W	YBR066C
	YAL061W	YJL123C				YGR112W	YCL037C				YGL073W	YOL073C				YLR071C	YPR032W									YJL026W	YPR187W				YOL064C	YGR118W				YAR002C-A	YBR066C				YHR187W	YPL181W
	YLR319C	YCR061W				YGR102C	YML114C				YOR336W	YGL120C				YKR065C	YJL080C									YOR051C	YGL043W				YER086W	YDR158W				YPL001W	YBL093C				YPL043W	YPL043W
	YPL234C	YGR101W				YPL202C	YNL096C				YDR156W	YFR051C				YMR315W	YLL026W									YOR293W	YDR177W				YGR245C	YDR055W				YJR076C	YML112W				YEL065W	YDL207W
	YPR188C	YER044C				YDR296W	YNL311C				YDR116C	YHR025W				YBR059C	YLR180W									YLR018C	YPL159C				YJL188C	YPL210C				YAL059W	YPR148C				YDR092W	YDR158W
	YAL025C	YLR447C				YML053C	YDR054C				YML075C	YLR172C				YDL224C	YMR024W									YDR194C	YKL013C				YDR445C	YGR245C				YER034W	YML094W				YLR225C	YBR267W
	YBR036C	YLR319C				YCR071C	YCL049C				YGR211W	YLR187W				YNL236W	YNR030W									YGR103W	YGR085C				YPL210C	YER086W				YOR075W	YGL189C				YJR014W	YEL065W
	YBR242W	YCL011C				YNL310C	YNL299W				YPR008W	YLR305C				YOL111C	YMR080C									YNR050C	YMR242C				YEL022W	YEL022W				YGR280C	YOR131C				YGR152C	YDL153C
	YKL153W	YOR061W				YNL096C	YBR060C				YOR153W	YJL109C				YLR187W	YHL004W									YDL061C	YNL131W				YNL075W	YER091C				YKL099C	YJR087W				YBR267W	YDR092W
	YLR262C-A	YGR008C				YBR065C	YBR002C				YER017C	YCR030C				YDL202W	YLR413W									YGR079W	YPL143W				YJR014W	YNL131W				YLR029C	YDL148C				YER100W	YIL118W
	YLR075W	YMR260C				YGL011C	YHL004W				YER019W	YEL046C				YDR227W	YPL183W-A									YGL246C	YER100W				YHR143W	YHR196W				YOL027C	YLR052W				YKL032C	YLR225C
	YDR272W	YGL044C				YLL036C	YBR039W				YLR436C	YOR047C				YKR090W	YML128C									YCL031C	YLR195C				YHR196W	YNL079C				YJL152W	YHR066W				YBL006C	YGR286C
	YDR406W	YJR105W				YOR342C	YIL041W				YDR239C	YMR290C				YKL100C	YJR138W									YDR025W	YPL019C				YML014W	YJR014W				YML112W	YGR081C				YML053C	YKL156W
	YGL020C	YFL005W				YOR091W	YHR203C				YLR172C	YLR207W				YKL062W	YBR059C									YPR108W	YNL232W				YDR158W	YML014W				YDL182W	YGL058W				YPR035W	YLR257W
	YIL040W	YJL079C				YPL259C	YGL219C				YNL317W	YLR397C				YKL022C	YBR115C									YBR267W	YGR020C				YLR325C	YLR325C				YML053C	YDR299W				YBL001C	YHR066W
	YGL068W	YOR261C				YLR059C	YPL202C				YER089C	YPR040W				YIL070C	YHR102W									YER057C	YJL188C				YDR471W	YMR319C				YDR184C	YLR243W				YGR286C	YBL001C
	YMR110C	YKL021C				YGR204W	YOR091W				YBR080C	YDR011W				YFL007W	YMR237W									YER006W	YDR060W				YJL050W	YHR143W				YNL215W	YDL099W				YOL005C	YBL006C
	YGR248W	YPL234C				YBL033C	YKR001C				YDR011W	YMR162C				YML126C	YMR315W									YLR197W	YLR448W				YHR049W	YDR471W				YOR198C	YOR202W				YPR036W-A	YPR036W-A
	YOL127W	YKR074W				YDR158W	YLR439W				YER068W	YAL017W				YMR222C	YML070W									YOR340C	YKR081C				YBR142W	YMR123W				YKR081C	YEL051W				YOL101C	YGR008C
	YKL065C	YNL323W				YNL191W	YJR014W				YHR025W	YOR204W				YNL297C	YML091C									YOL093W	YDL075W				YFL038C	YDL122W				YDR365C	YPR187W				YJR076C	YJR014W
	YOR108W	YCR077C				YGR237C	YER183C				YJL159W	YDL171C				YDR166C	YDR322W									YJL148W	YDR194C				YMR319C	YNL075W				YNL162W	YIL138C				YHR066W	YIL019W
	YGL044C	YLR388W				YJR014W	YDL201W				YKL124W	YOR290C				YBL022C	YDR239C									YBR105C	YDL201W				YBL024W	YHR049W				YBR135W	YLR051C				YML080W	YER100W
	YFL005W	YOR362C				YDR151C	YNL131W				YAL023C	YOR153W				YML070W	YOL111C									YBR154C	YLR022C				YGL120C	YDR177W				YML080W	YGL169W				YKL156W	YOL005C
	YDL136W	YOL061W				YLR260W	YGL120C				YJR117W	YJR109C				YKL146W	YGL206C									YML024W	YFL001W				YOR119C	YBR142W				YML052W	YNL153C				YBR273C	YKL032C
	YHR174W	YNL100W				YPL135W	YBR065C				YEL046C	YOL081W				YMR288W	YNR031C									YPL210C	YJL145W				YDR177W	YOR119C				YBR082C	YML052W				YDR040C	YJR076C
	YDR415C	YPR016C				YLR439W	YGR237C				YKL068W	YPL049C				YML091C	YGL092W									YCL054W	YKL143W				YER102W	YGL043W				YGL101W	YGL147C				YBR279W	YML080W
	YJL156C	YDL236W				YER020W	YBR055C				YLR398C	YHR079C				YOR090C	YNL271C									YHR169W	YOR004W				YNL131W	YJL050W				YJR087W	YLR325C				YML106W	YIL079C
	YPR016C	YKL196C				YJR093C	YPL229W				YNL190W	YGR061C				YNL190W	YEL047C									YIL064W	YDR245W				YCL064C	YFL038C				YDL010W	YOL041C				YMR161W	YPR141C
	YBR159W	YDL228C				YBR135W	YPL135W				YGL213C	YBR214W				YGL038C	YOR336W									YOR101W	YDR168W				YNL079C	YOR202W				YNL061W	YMR189W				YDR408C	YBR279W
	YOL020W	YOL127W				YNL299W	YHR187W				YMR205C	YNR033W				YLR436C	YBL017C									YOR119C	YDL122W				YDR054C	YGL120C				YOR182C	YBL054W				YIL079C	YOL101C
	YDR154C	YGL200C				YKL062W	YDR151C				YDR457W	YDR422C				YLR303W	YKR090W									YAR015W	YOR294W				YGL043W	YBL024W				YGR246C	YCL055W				YGL122C	YPR035W
	YLR406C	YJL009W				YGR012W	YBR221C				YLR069C	YDR017C				YGR049W	YGR178C									YNL162W	YJL148W				YBL092W	YER075C				YMR189W	YGR005C				YLR257W	YEL003W
	YLR034C	YKL166C				YDL201W	YMR310C				YJL109C	YOR171C				YDR539W	YIL005W									YGL078C	YGR187C				YMR123W	YBR267W				YKR047W	YBL001C				YMR043W	YMR161W
	YOR261C	YMR110C				YBR193C	YPL137C				YOR219C	YKL029C				YLR389C	YIL056W									YJL190C	YMR044W				YHR197W	YPR187W				YAL044C	YIL079C				YLR186W	YBR273C
	YGL162W	YDR415C				YOR230W	YDR296W				YGR217W	YKL062W				YGR054W	YIL070C									YGR145W	YNL180C				YBR267W	YDR054C				YER112W	YER034W				YGR103W	YLR142W
	YHR138C	YJL156C				YHR203C	YLR260W				YOL078W	YDR044W				YFL039C	YNL134C									YIL051C	YLR295C				YLR017W	YBL092W				YEL066W	YMR142C				YPR169W	YDR408C
	YLR285W	YPR069C				YPL229W	YER006W				YKL146W	YPL084W				YIL109C	YML126C									YMR146C	YML105C				YGL077C	YER102W				YBR157C	YNL215W				YCR005C	YMR195W
	YLR388W	YKR047W				YBR060C	YDR153C				YGR162W	YPL173W				YMR237W	YDR039C									YLR002C	YGR158C				YER043C	YNL292W				YIL079C	YHR170W				YEL003W	YDR043C
	YER044C	YKL065C				YBL024W	YBR193C				YCR033W	YGR097W				YBR260C	YNL236W									YBR142W	YLR029C				YER075C	YCL064C				YOR281C	YPL001W				YOL038W	YJL122W
	YMR196W	YOR307C				YDR423C	YBR135W				YMR287C	YHR215W				YLR450W	YML059C									YMR295C	YGL244W				YHR179W	YHR197W				YMR043W	YEL066W				YBL033C	YDR040C
	YHR039C	YGR248W				YPL199C	YGR102C				YHR216W	YBR202W				YAL038W	YDL224C									YDR052C	YIL052C				YNL292W	YLR059C				YOL022C	YNL231C				YIR004W	YBL046W
	YPR028W	YGL020C				YDR153C	YGR140W				YOR204W	YBR146W				YML038C	YBL047C									YER055C	YDL061C				YER168C	YGL077C				YGR253C	YDR486C				YLL008W	YOL038W
	YNL100W	YDR514C				YER013W	YLR244C				YBL051C	YGR162W				YOR109W	YNL071W									YKR092C	YLR186W				YOR202W	YLR017W				YDR021W	YBR135W				YMR195W	YGR103W
	YKL196C	YHR039C				YLR154W-E	YKL062W				YGR036C	YNL054W				YMR261C	YBR221C									YNR051C	YHL015W				YPR187W	YDR465C				YDL155W	YAR002C-A				YDR043C	YIL063C
	YJL009W	YLR406C				YOR163W	YER020W				YLL044W	YBR218C				YPL177C	YLR259C									YKR094C	YOL093W				YDR399W	YER020W				YAL033W	YDL181W				YDR177W	YCR005C
	YKR047W	YER133W				YLR244C	YJR093C				YGL129C	YER017C				YBR058C	YBL022C									YPR035W	YPR108W				YDR465C	YJR072C				YLR051C	YBL027W				YJL122W	YML106W
	YOR173W	YLR075W				YPR084W	YPL262W				YEL032W	YDR330W				YGR178C	YLR071C									YDR454C	YDR025W				YEL026W	YER074W				YHR090C	YJR076C				YPL135W	YMR043W
	YDR427W	YBR036C				YOL054W	YFL039C				YML129C	YBR079C				YIR038C	YAL023C									YOR089C	YJL168C				YER074W	YPR137W				YIL052C	YOR293W				YIL019W	YPR169W
	YDR100W	YDL161W				YMR121C	YOR230W				YBR079C	YFL034C-B				YLR419W	YDR156W									YIL041W	YOL005C				YEL055C	YDR399W				YGR085C	YGL101W				YIL063C	YIR004W
	YKL007W	YDR372C				YAL013W	YLR059C				YER167W	YAL039C				YKL155C	YIL109C									YJR047C	YAR002W				YJR072C	YER168C				YKL075C	YDR361C				YPR141C	YLL008W
	YJL101C	YFL028C				YBR273C	YLL010C				YFR021W	YBR080C				YKL212W	YCL040W									YMR123W	YJR072C				YER020W	YAR002W				YJR145C	YJL152W				YOR194C	YHR039C-A
	YDL161W	YIL019W				YLL032C	YOL126C				YKL029C	YDR116C				YDR156W	YBR039W									YGL011C	YKR071C				YER025W	YKL120W				YDR486C	YBL057C				YLR142W	YOR194C
	YML007W	YCR090C				YIR004W	YMR290C				YKL038W	YDR457W				YOR113W	YKR065C									YMR235C	YGR079W				YPL135W	YKR025W				YKL143W	YMR028W				YDL100C	YBL033C
	YFL028C	YDR100W				YHR169W	YML091C				YLR106C	YDL086W				YIR037W	YNL055C									YJR144W	YCL031C				YKL120W	YPL135W				YPL170W	YKL096W-A				YER048C	YLR186W
	YPR165W	YER159C				YPL137C	YBR030W				YPL202C	YJR117W				YBR229C	YOR153W									YNR006W	YGL246C				YKR025W	YEL055C				YDL100C	YML080W				YNL229C	YNL050C
	YML022W	YGR267C				YKR001C	YBL033C				YKL182W	YGL126W				YLL028W	YLR389C									YDL147W	YDR399W				YPR137W	YHR179W				YMR242C	YMR014W				YBL046W	YDR177W
	YLR220W	YOR096W				YBR030W	YBL054W				YHR186C	YPR008W				YGR240C	YPL089C									YER122C	YHR169W				YLR059C	YEL026W				YLR186W	YOR182C				YHR039C-A	YJL190C
	YPR170W-B	YOR291W				YOL135C	YCR071C				YLR086W	YOR090C				YCL040W	YBR218C									YKL215C	YBL027W				YPL106C	YBR154C				YGR202C	YDR021W				YBR146W	YDR527W
	YER133W	YJL143W				YKR006C	YPL259C				YDR349C	YKR001C				YMR171C	YDR166C									YDL019C	YDR052C				YBR154C	YHR162W				YDR361C	YDL155W				YOR075W	YBR105C
	YPL225W	YJL101C				YOR233W	YOR340C				YGR061C	YCL009C				YBL064C	YKL146W									YJL016W	YPL093W				YBL033C	YER043C				YER055C	YDL010W				YDR527W	YGL122C
	YOR329C	YFR047C				YCR059C	YOL135C				YNL108C	YGR237C				YAL012W	YNL297C									YKL126W	YBL054W				YCL030C	YER025W				YDR280W	YGR280C				YGR147C	YOR075W
	YOR021C	YDR427W				YOR202W	YNL053W				YFR019W	YLR106C				YBR218C	YOR090C									YMR080C	YDL147W				YGR159C	YML016C				YGL135W	YKR094C				YOR202W	YBR230C
	YLR130C	YOR173W				YOR035C	YMR121C				YMR291W	YER068W				YDL047W	YGL038C									YER019W	YIL064W				YML016C	YBL033C				YOR194C	YKL075C				YKR062W	YNL229C
	YKR074W	YCL039W				YDL053C	YLL032C				YPL110C	YOR113W				YJL041W	YKL100C									YBR212W	YPL145C				YAL012W	YER008C				YJL148W	YNL162W				YJL190C	YGR085C
	YKL166C	YHL003C				YOR081C	YDR530C				YPR161C	YNR011C				YGL088W	YBR260C									YDL095W	YGL135W				YHR162W	YCL030C				YIL148W	YKL144C				YDR051C	YLR029C
	YML115C	YBL055C				YIL084C	YCR059C				YGR084C	YGL073W				YPR149W	YMR261C									YLR187W	YPL210C				YDL167C	YPL106C				YGR020C	YPL037C				YDR060W	YJL188C
	YJL143W	YML022W				YNL053W	YNL072W				YOR267C	YOR336W				YDR096W	YDL202W									YHR113W	YER057C				YDL061C	YDL061C				YBL057C	YOL038W				YOR206W	YBR058C-A
	YDR167W	YLR285W				YLR215C	YPL199C				YGL092W	YEL032W				YDR326C	YFL007W									YBR149W	YLR002C				YJL138C	YDL167C				YLR407W	YAL033W				YGL043W	YBR146W
	YOR096W	YGR262C				YPR124W	YOR342C				YOR181W	YER019W				YLR342W	YPL177C									YMR297W	YBR267W				YEL036C	YAL012W				YER100W	YCR031C				YBL092W	YGR147C
	YGR260W	YOR123C				YDR530C	YCL005W-A				YLR419W	YOL126C				YER155C	YBR229C									YJR121W	YMR123W				YGL231C	YOR001W				YIL133C	YOR198C				YLR029C	YOR234C
	YDL083C	YML007W				YCL005W-A	YOR163W				YER105C	YKL182W				YOR140W	YKL022C									YDR046C	YNR050C				YML026C	YGR159C				YOR338W	YML074C				YDL131W	YPL135W
	YDR514C	YKL007W				YNL252C	YOR056C				YDL237W	YKL068W				YBR055C	YMR222C									YJR143C	YAR015W				YPR110C	YGL231C				YGR001C	YJL148W				YDL150W	YLR388W
	YLR250W	YOR108W				YGR140W	YLL036C				YDL047W	YKL155C				YLR410W	YKL062W									YGL167C	YGR103W				YPL012W	YML026C				YJR014W	YDR177W				YGR008C	YDL100C
	YBL055C	YLR220W				YDR422C	YPR084W				YPR156C	YLR398C				YLR219W	YMR288W									YDR129C	YOR340C				YGR195W	YGR085C				YOR110W	YDL182W				YNL050C	YMR194W
	YGR267C	YBR154C				YPR025C	YGR012W				YOR371C	YDR347W				YPR127W	YOR109W									YJR103W	YOL142W				YKR056W	YPL181W				YPL243W	YKR081C				YMR183C	YOL077W-A
	YDR372C	YKL094W				YMR197C	YOR035C				YHR070W	YER089C				YDL004W	YDR227W									YAL040C	YOR101W				YOR243C	YBR084C-A				YPL249C-A	YOR281C				YGR118W	YOR202W
	YGL110C	YPR170W-B				YIL093C	YGR211W				YDR205W	YDR150W				YOR171C	YIR038C									YOR197W	YNR006W				YBR084C-A	YIR033W				YML073C	YER112W				YDL208W	YER048C
	YOR307C	YOL020W				YPR008W	YOR202W				YDL117W	YOR085W				YLR259C	YDR539W									YDR188W	YBR154C				YDL153C	YOR243C				YML015C	YDR365C				YJL188C	YOR052C
	YJL055W	YGL110C				YDR408C	YDR423C				YLR300W	YLR300W				YOR081C	YER178W									YPL221W	YER006W				YOL139C	YGR195W				YNL035C	YLR407W				YBR105C	YGR118W
	YIL019W	YPR165W				YPR129W	YGL011C				YJR065C	YOL051W				YLR310C	YLR187W									YDR036C	YJL026W				YDR346C	YDL153C				YDR086C	YGR246C				YOR089C	YKR062W
	YCL039W	YLR130C				YER057C	YDR422C				YCL009C	YKL146W				YLR180W	YGR240C									YGL077C	YOR293W				YOR001W	YJL138C				YPL026C	YHR090C				YLR025W	YOL018C
	YPL139C	YGR284C				YOL078W	YBR273C				YPR129W	YJL121C				YPL006W	YLR450W									YHL030W	YOR089C				YER064C	YPR110C				YDL181W	YOL027C				YNL308C	YDR051C
	YHR045W	YLR301W				YBR028C	YOL054W				YOL126C	YAL043C				YFR051C	YBR058C									YDL185W	YBR142W				YER110C	YDR346C				YGR118W	YAL044C				YMR311C	YBL092W
	YKL094W	YDR306C				YAR015W	YOR233W				YLR244C	YML129C				YDR347W	YNL190W									YBL037W	YOR119C				YIR033W	YKR056W				YLR110C	YPL170W				YCL025C	YDR060W
	YOR291W	YHR181W				YOR056C	YBR011C				YOR155C	YNL102W				YHR070W	YBL064C									YDR293C	YCL054W				YPL181W	YNL162W				YOL038W	YOR194C				YCR051W	YNL308C
	YDR267C	YJL140W				YKR007W	YOR001W				YOR178C	YLR086W				YGR061C	YGR049W									YJL002C	YPR137W				YNL162W	YEL015W				YNL002C	YGR008C				YER122C	YOL041C
	YLR237W	YML055W				YMR310C	YDL053C				YMR313C	YER086W				YBR169C	YKL212W									YPL023C	YJR047C				YEL015W	YEL036C				YGL106W	YGR202C				YOL041C	YMR183C
	YNL178W	YHR196W				YGR058W	YPL128C				YBR028C	YKL124W				YLR354C	YOR113W									YHR102W	YOL088C				YGR085C	YMR091C				YGR079W	YML015C				YNL104C	YGL043W
	YCR090C	YDL083C				YOR340C	YCL044C				YKR001C	YNL317W				YML099C	YHR098C									YKL146W	YPL032C				YMR091C	YCR035C				YMR058W	YDR382W				YNL153C	YDL150W
	YFL009W	YGR132C				YGL120C	YPR124W				YKL034W	YJR065C				YLR095C	YLR436C									YML078W	YGR145W				YDL111C	YPL012W				YHL015W	YMR146C				YBL027W	YOR206W
	YHR181W	YML115C				YKL015W	YLR215C				YCL008C	YHR186C				YIR023W	YML038C									YBR170C	YGL011C				YCR035C	YDL111C				YML106W	YMR043W				YJR002W	YLR025W
	YNR012W	YOR329C				YBR011C	YAR015W				YKL109W	YDR096W				YOR038C	YOR140W									YIR036C	YMR239C				YGR123C	YKR014C				YPR060C	YBR082C				YOR052C	YMR311C
	YML055W	YDR429C				YJL056C	YPR106W				YBR218C	YDR239C				YHR108W	YBL069W									YCR073W-A	YIL044C				YKR014C	YPL225W				YCR059C	YKR047W				YJR063W	YLR407W
	YGR132C	YDR267C				YBL054W	YAL013W				YNL169C	YCR033W				YNR049C	YAL012W									YAL042W	YBR105C				YIL145C	YER064C				YGL043W	YJL054W				YOR234C	YHR192W
	YOR123C	YOR234C				YCL044C	YOL078W				YJL121C	YLR436C				YPR042C	YLR354C									YOR002W	YOR342C				YER166W	YOL139C				YLR195C	YDR312W				YLR388W	YDL208W
	YPL004C	YPL139C				YBR195C	YOR236W				YDL040C	YPR161C				YOL057W	YGR054W									YLR027C	YJL190C				YLR153C	YKL196C				YDL065C	YKL143W				YER094C	YDL131W
	YDR429C	YIL016W				YOL126C	YOR081C				YGR002C	YLR058C				YOR291W	YJL109C									YDL022W	YMR295C				YBR084W	YCL031C				YIL016W	YOR110W				YOL018C	YLR167W
	YFR047C	YGR260W				YMR181C	YDR225W				YFL010C	YNL190W				YBR221C	YIR037W									YDR047W	YNL162W				YMR027W	YER110C				YDL136W	YOR338W				YHR192W	YOR089C
	YBR154C	YIR022W				YPL083C	YER013W				YNL271C	YOR032C				YER178W	YGR061C									YER069W	YNR051C				YLR110C	YFL002C				YJL104W	YLR257W				YPL212C	YCL029C
	YIR022W	YER088C				YGR193C	YDR408C				YDL202W	YPL202C				YMR083W	YDL229W									YPL197C	YLR197W				YMR008C	YGR123C				YGR147C	YIL084C				YMR194W	YPR087W
	YGL200C	YNR012W				YPR065W	YKR006C				YDR166C	YOR233W				YLR244C	YPL006W									YLL024C	YIL051C				YPL082C	YDL201W				YDL208W	YGR253C				YPL159C	YNL153C
	YLR154W-A	YLR250W				YOR001W	YMR197C				YDR296W	YLR244C				YPL049C	YML099C									YDR345C	YER122C				YFR031C-A	YGR148C				YPR169W	YDR280W				YMR033W	YBL027W
	YIL076W	YML026C				YNR006W	YIL084C				YMR288W	YBL051C				YLR099C	YPR149W									YIR006C	YPL129W				YCR004C	YNL010W				YDL122W	YDL065C				YLR407W	YJR002W
	YCR037C	YPR154W				YMR067C	YDR038C				YOL021C	YER105C				YGR227W	YGL088W									YMR110C	YJR144W				YAL026C	YBR177C				YAL032C	YJL122W				YBR058C-A	YJR063W
	YLR162W	YJL055W				YPL173W	YPR025C				YMR165C	YLR069C				YGL003C	YER155C									YEL032W	YJL098W				YBL030C	YPL204W				YGR103W	YLR186W				YKL013C	YOL010W
	YHL003C	YNL178W				YGL213C	YGR152C				YDR036C	YGL213C				YPR125W	YHR108W									YIL033C	YDR377W				YPL190C	YPR112C				YDL191W	YDR063W				YCL029C	YCR051W
	YER088C	YIL076W				YER006W	YBR195C				YDR159W	YER167W				YDR116C	YMR171C									YAL021C	YKR092C				YNL330C	YNL124W				YLR038C	YOL022C				YGR085C	YKL013C
	YJL140W	YNL067W				YPL262W	YPR008W				YPR034W	YHR216W				YGR078C	YDR096W									YML075C	YMR146C				YEL047C	YJR007W				YBR105C	YLR029C				YBR034C	YPL159C
	YOL086C	YGR186W				YLR450W	YIR004W				YER086W	YFR021W				YKL138C	YLR310C									YBR026C	YGR135W				YLR100W	YOR209C				YGR145W	YNL061W				YER019C-A	YPR187W
	YOR175C	YOR175C				YNL054W	YER057C				YOR109W	YGL062W				YNR011C	YFR051C									YLR241W	YER127W				YOL004W	YCL050C				YGR180C	YGR020C				YOL010W	YGR187C
	YKL021C	YCR028C-A				YPR015C	YER158C				YLR058C	YOR219C				YJR127C	YLL028W									YJR059W	YLR421C				YDR385W	YMR131C				YDR312W	YNL151C				YDR311W	YBR034C
	YGR043C	YHR045W				YBR260C	YPR129W				YLR248W	YGL049C				YOR107W	YKL155C									YLR414C	YER055C				YDR380W	YFR004W				YGR135W	YER100W				YML130C	YNL104C
	YGR186W	YGR235C				YOR201C	YLR448W				YER134C	YDL040C				YOR299W	YNR049C									YLL015W	YCR002C				YHR009C	YJL033W				YDL131W	YDR086C				YPR187W	YKL214C
	YLR301W	YGL031C				YER158C	YKR007W				YGR078C	YKL038W				YLR064W	YLR342W									YLR438W	YGL078C				YDR238C	YDL147W				YJR063W	YPR131C				YOL077W-A	YER094C
	YIL090W	YCR009C				YIL142W	YMR181C				YLR403W	YMR287C				YGR217W	YIL011W									YGR097W	YML024W				YOR160W	YLR399C				YDL166C	YAL013W				YDR465C	YMR033W
	YGR284C	YFL009W				YPR106W	YIL142W				YDR430C	YPL057C				YBR149W	YDL047W									YCL057W	YDR454C				YIL009W	YDR044W				YPR131C	YNL002C				YDR054C	YCL025C
	YGR117C	YHL034W-A				YDR044W	YBR028C				YML029W	YFR019W				YDR143C	YCR046C									YHR028C	YKL040C				YBR074W	YGL201C				YPL093W	YNL035C				YBR230C	YDR311W
	YOR234C	YPL004C				YOR236W	YNL252C				YPR024W	YOR267C				YJL056C	YGL253W									YNL045W	YGR089W				YGL092W	YGL200C				YBR118W	YPL026C				YML052W	YER122C
	YMR092C	YBR046C				YDR240C	YGR058W				YLR179C	YHR070W				YDR296W	YGR211W									YGL195W	YHR077C				YMR202W	YGR014W				YOL144W	YGR085C				YPL037C	YCR035C
	YHR196W	YLR421C				YBR130C	YJL056C				YLR203C	YPR156C				YLR203C	YOR038C									YBR222C	YDR225W				YMR296C	YBL047C				YGL209W	YDL100C				YPR087W	YPL212C
	YBR046C	YDL075W				YJR113C	YGR193C				YGR049W	YOR109W				YBL069W	YOR081C									YDR349C	YKR094C				YGL009C	YPR074C				YPL232W	YGR207C				YCR035C	YDR465C
	YCR082W	YMR178W				YNL072W	YDR528W				YDR238C	YLL044W				YCR046C	YJL041W									YBR140C	YDR465C				YOR085W	YOR197W				YDL201W	YER055C				YLR167W	YER019C-A
	YGR235C	YIL090W				YGR251W	YNR038W				YOL004W	YGL092W				YJL109C	YBR055C									YGL012W	YNL022C				YLR027C	YLR153C				YML062C	YPL159C				YNR018W	YBL057C
	YHL034W-A	YCR037C				YPL011C	YBR130C				YDL224C	YGR217W				YHR165C	YPR125W									YPL231W	YOR243C				YOR230W	YER166W				YCL050C	YPL249C-A				YPL106C	YPR102C
	YER150W	YLL045C				YML091C	YGL213C				YCL037C	YML126C				YPR129W	YHR070W									YJL062W	YIL019W				YBL099W	YKL112W				YOR327C	YML077W				YGR187C	YGR271C-A
	YPR154W	YDR064W				YDR528W	YDR044W				YBR260C	YMR291W				YLR398C	YLR095C									YBR139W	YIL041W				YIL011W	YGL197W				YLR344W	YAL032C				YIL083C	YLR022C
	YER159C	YKR072C				YGR252W	YPR065W				YML110C	YDR349C				YMR121C	YGR227W									YHR098C	YIL104C				YDR171W	YBR084W				YDR226W	YGR001C				YJL010C	YML052W
	YNL067W	YAR027W				YAL011W	YIL093C				YDR264C	YPL177C				YNL054W	YDR326C									YJL158C	YML073C				YDR293C	YJL159W				YNL151C	YNR039C				YKL214C	YGL103W
	YMR260C	YGR117C				YNL290W	YBR260C				YPL259C	YLR179C				YBR080C	YDR347W									YJR016C	YPR072W				YJL041W	YDR077W				YPL138C	YMR242C				YOL022C	YDL053C
	YIL016W	YMR074C				YMR295C	YLR450W				YPR035W	YNL108C				YKR001C	YLR419W									YDR457W	YMR235C				YIL115C	YBR118W				YHL029C	YGR079W				YLR099C	YPL037C
	YML069W	YMR092C				YER064C	YKL015W				YER064C	YLR419W				YGL049C	YLR219W									YMR318C	YPR035W				YIL075C	YPL031C				YLR367W	YOR215C				YIR026C	YIL083C
	YLL045C	YDL165W				YMR290C	YPL083C				YDR326C	YPL110C				YBR112C	YBR169C									YNR008W	YNL035C				YPL028W	YIL018W				YPL131W	YLR038C				YLR022C	YML130C
	YKR072C	YHR089C				YBR112C	YOR201C				YPR036W	YPR129W				YPR161C	YOR171C									YKR089C	YJR014W				YOR370C	YLR438W				YBL046W	YGL043W				YKL028W	YJR052W
	YGR008C	YER012W				YDR038C	YPR168W				YNL311C	YDR122W				YOL004W	YOR107W									YKL204W	YOR261C				YKR018C	YMR027W				YKL120W	YPL243W				YBL057C	YNR050C
	YKL051W	YML069W				YNR015W	YBR261C				YML126C	YPR036W				YKL068W	YOR299W									YJR124C	YGR157W				YOR099W	YAL026C				YML071C	YIL016W				YJR052W	YKL028W
	YDL075W	YDR276C				YHR099W	YMR067C				YJL082W	YOL021C				YNL317W	YLR410W									YBR074W	YER090W				YGL026C	YCR004C				YBL006C	YKL040C				YER072W	YML094W
	YBR026C	YPL273W				YAL021C	YHR099W				YJR017C	YOR323C				YNL168C	YIR003W									YNL330C	YKL210W				YDL132W	YPL082C				YIL044C	YKL013C				YNL244C	YMR044W
	YDL166C	YBR214W				YBR221C	YJR113C				YFL033C	YDL117W				YAL029C	YIR023W									YJR109C	YCR030C				YML103C	YLR106C				YCL031C	YPR060C				YLR196W	YDR054C
	YDL165W	YKL051W				YLR448W	YGL038C				YLR095C	YDL237W				YLR403W	YOL057W									YEL046C	YDL237W				YIR035C	YFR031C-A				YPL159C	YGR135W				YDL122W	YJL168C
	YLR421C	YDR077W				YDL036C	YNL054W				YER027C	YDR264C				YPR024W	YLR244C									YGR199W	YLR304C				YDL078C	YNL330C				YPL011C	YJR014W				YOL142W	YLR099C
	YDR306C	YLR249W				YGR211W	YGR251W				YOR098C	YOL004W				YKL124W	YKR001C									YPR159W	YLL026W				YBL058W	YOL004W				YHR144C	YGR147C				YOR091W	YNR018W
	YLR249W	YHL020C				YOR275C	YPR091C				YGL127C	YNL262W				YKR096W	YLR099C									YGL008C	YOR370C				YBR023C	YIL145C				YIL118W	YJR145C				YPR102C	YOL142W
	YML026C	YOR327C				YOR110W	YNR006W				YLR342W	YGR084C				YLR256W	YPL049C									YLR390W-A	YMR275C				YMR171C	YPL190C				YOR222W	YBL006C				YML094W	YJL010C
	YJL173C	YJR042W				YNL236W	YDR240C				YBR058C	YKL034W				YLR397C	YPR042C									YNR030W	YNL238W				YLR203C	YDR238C				YKL113C	YMR005W				YMR044W	YPR112C
	YDR064W	YJL014W				YPR091C	YOL070C				YCL017C	YNL271C				YOR219C	YMR083W									YMR105C	YGL201C				YOR168W	YKL004W				YDR245W	YDR151C				YAL035W	YOL022C
	YGR183C	YHR063W-A				YJL127C	YPL173W				YIL145C	YGR036C				YIL011W	YGL003C									YBL030C	YHR132C				YJR065C	YLR390W-A				YDR151C	YBL046W				YLR002C	YLR002C
	YJL014W	YPL125W				YNL288W	YJL127C				YER013W	YLR248W				YDR017C	YDR143C									YAR042W	YMR143W				YGR260W	YDR380W				YPL090C	YJL179W				YGL103W	YNL244C
	YJR104C	YGL198W				YNL099C	YOR101W				YCL049C	YKL109W				YMR162C	YDR116C									YJR126C	YDL224C				YGL207W	YEL047C				YBR181C	YBR105C				YJL168C	YGL222C
	YPL125W	YJR104C				YNL317W	YDL036C				YOR330C	YCL037C				YGR156W	YBR149W									YGL084C	YKL157W				YEL007W	YDR385W				YOR091W	YKR080W				YDL053C	YPL106C
	YKL064W	YKR094C				YBR205W	YNL290W				YHR108W	YPL048W				YJL063C	YLR064W									YDR011W	YIL088C				YGL012W	YHR009C				YGR208W	YJL104W				YPR075C	YHR030C
	YJR042W	YJL152W				YER154W	YAL021C				YER090W	YPR024W				YPR036W	YGR078C									YOR109W	YBR166C				YJL001W	YBR074W				YNR006W	YGL106W				YHR030C	YBR173C
	YMR178W	YML096W				YOR101W	YIL150C				YKL212W	YDL047W				YHR062C	YDL045W-A									YJR077C	YBR001C				YLR305C	YLR340W				YNL097C	YGL209W				YPR112C	YOR091W
	YGL031C	YGR200C				YJL198W	YNL236W				YJR059W	YGR240C				YHR025W	YPL137C									YOL122C	YLR069C				YGL245W	YLR100W				YKL013C	YCR059C				YKL117W	YIR026C
	YKR094C	YBR183W				YNL239W	YGR252W				YGR202C	YDR238C				YGR211W	YLR403W									YLR044C	YNR013C				YAL042W	YGL092W				YGR148C	YML062C				YBR173C	YML093W
	YBR196C	YKL064W				YGR054W	YER154W				YMR006C	YLR403W				YGL084C	YDR296W									YNL134C	YOL081W				YDL126C	YMR296C				YDR494W	YIL148W				YPL227C	YAL059W
	YLL015W	YHR072W				YGL038C	YBR112C				YEL031W	YGL129C				YOR092W	YJR127C									YMR276W	YOR321W				YJR077C	YOR160W				YMR240C	YPL138C				YGL222C	YLR196W
	YGR200C	YEL058W				YOR359W	YDR506C				YGL040C	YPL082C				YNL160W	YHR025W									YKR046C	YBR187W				YBR031W	YLR110C				YIL053W	YPL011C				YNL124W	YDL051W
	YBR214W	YLL015W				YNR038W	YPL226W				YBR112C	YLR342W				YER089C	YMR121C									YFR051C	YBL101C				YDR155C	YOR085W				YPL050C	YDR405W				YDL051W	YJL125C
	YGL198W	YHR201C				YKL124W	YOR359W				YPL082C	YOR155C				YOR098C	YKL138C									YDR001C	YMR016C				YLR398C	YNL052W				YMR116C	YGR145W				YML093W	YDL122W
	YDR077W	YIL088C				YJL076W	YGR162W				YDR322W	YCL008C				YGR271W	YML129C									YJL141C	YGL022W				YIL047C	YMR202W				YMR260C	YDR494W				YMR131C	YPL227C
	YCR009C	YGR295C				YGL210W	YNL239W				YJR049C	YPR035W				YGR056W	YLR397C									YGL026C	YMR080C				YPL197C	YIL009W				YHR203C	YOR222W				YDR153C	YDL010W
	YPL273W	YLR066W				YJR060W	YMR295C				YLL031C	YDR205W				YER019W	YPR024W									YIL109C	YKL004W				YML078W	YGL009C				YNL113W	YJR063W				YGL210W	YDR299W
	YCR028C-A	YMR022W				YGL237C	YJR007W				YLR115W	YGR002C				YDR330W	YNL168C									YJL172W	YDR119W				YKL051W	YOR230W				YIR026C	YFL001W				YDR194C	YKL117W
	YML056C	YPR095C				YOR290C	YOR188W				YMR222C	YER027C				YHR205W	YBR080C									YLL048C	YNL138W				YPR159W	YBL099W				YGR207C	YML106W				YOR294W	YER072W
	YGR295C	YDR304C				YER061C	YHR025W				YBR039W	YOR181W				YLR380W	YLR203C									YPR113W	YIL043C				YMR080C	YLR027C				YNL206C	YML073C				YER095W	YAL035W
	YER012W	YJL136C				YPR168W	YGL197W				YGR056W	YGL040C				YMR268C	YKL124W									YPR156C	YER052C				YKR066C	YIL115C				YBL087C	YHR036W				YGR271C-A	YMR131C
	YMR074C	YGL207W				YHR206W	YKL180W				YBR030W	YNL139C				YLR399C	YLR398C									YJL101C	YEL031W				YDR432W	YJL041W				YOR215C	YNR006W				YEL015W	YCL049C
	YML096W	YOR181W				YDR227W	YAL011W				YLR113W	YER090W				YJL192C	YER089C									YLR256W	YPR034W				YKL046C	YDR171W				YGR245C	YPR169W				YIL091C	YLR073C
	YHR072W	YJL178C				YBR261C	YGL039W				YGR055W	YGR078C				YIL034C	YHR062C									YMR272C	YMR208W				YJR059W	YDR293C				YPL266W	YLR387C				YDL088C	YNL124W
	YAR027W	YPL023C				YLR186W	YNR015W				YGR240C	YMR313C				YML129C	YPR161C									YOL059W	YER056C				YHR020W	YIL075C				YHR036W	YGR118W				YDR035W	YOR281C
	YJL152W	YER056C				YOR191W	YNL317W				YEL043W	YDR296W				YCR033W	YBR112C									YCR048W	YHR099W				YBR170C	YMR008C				YIR011C	YHR144C				YDR299W	YPR075C
	YDR304C	YOR360C				YHR018C	YOR275C				YPL169C	YFL010C				YNL049C	YJL063C									YBL007C	YER099C				YBR115C	YBL030C				YIL083C	YIL133C				YER145C	YOR294W
	YHR089C	YDR057W				YGR162W	YJL084C				YBR140C	YBR028C				YOL073C	YHR165C									YNL322C	YDL019C				YDL048C	YOR370C				YDR429C	YML071C				YLR073C	YDL088C
	YLL050C	YHR032W				YKL180W	YPL011C				YPL183W-A	YOR371C				YHR123W	YKL068W									YER017C	YDL171C				YML115C	YOR099W				YKR080W	YLR025W				YDL010W	YGL210W
	YHL020C	YDL168W				YGL226W	YNL099C				YHR188C	YLR347C				YIL047C	YOL004W									YKL203C	YJR066W				YLR342W	YKR018C				YLR355C	YLR195C				YBL024W	YIL091C
	YOR327C	YIL075C				YGL101W	YHR108W				YMR272C	YML029W				YNL239W	YOR092W									YER088C	YEL042W				YMR261C	YPL028W				YBL003C	YDL208W				YGR135W	YER145C
	YJL178C	YFR006W				YBR141C	YKL124W				YDR420W	YHR108W				YLR347C	YNL160W									YGR281W	YMR214W				YDR335W	YDL132W				YPL043W	YLL027W				YAL059W	YDR153C
	YDR289C	YBR222C				YER120W	YBR205W				YBR055C	YGR049W				YPL137C	YNL317W									YDL195W	YGR240C				YKL006W	YML103C				YLR175W	YOL142W				YDR145W	YGR135W
	YEL058W	YLR055C				YCL050C	YER064C				YKL020C	YDR166C				YJR045C	YGL084C									YKL182W	YDR129C				YOR108W	YGL026C				YGR089W	YOL144W				YGR163W	YDR450W
	YMR022W	YHR057C				YLR412W	YJL042W				YDL141W	YDL224C				YLR118C	YPR036W									YPL154C	YLR259C				YNL243W	YOR168W				YHR021C	YIL052C				YCL049C	YDR486C
	YBR183W	YLR344W				YGL236C	YGR054W				YJR116W	YML110C				YHR036W	YLR380W									YDR206W	YML056C				YLR028C	YDL078C				YKR025W	YMR239C				YDR450W	YGR163W
	YJL190C	YDR119W				YPL049C	YJR060W				YPL188W	YBR112C				YDR293C	YPR129W									YHR072W	YML085C				YJL158C	YJR065C				YPL129W	YDL136W				YJL125C	YBR057C
	YIL052C	YDL205C				YIL150C	YHR018C				YDL042C	YBR260C				YKL104C	YJL056C									YGR055W	YDR093W				YBL101C	YMR171C				YHR169W	YDL166C				YJL050W	YDR194C
	YLR066W	YLR020C				YDR330W	YLR412W				YBR021W	YJR007W				YOR042W	YGL049C									YJR104C	YJR040W				YHR026W	YBL058W				YPR125W	YGR089W				YDL166C	YEL015W
	YHR201C	YOR039W				YHR062C	YHR062C				YPL042C	YDL202W				YJR080C	YKL104C									YDL093W	YBR084W				YMR143W	YBR023C				YPL198W	YDR070C				YLR074C	YNL005C
	YER056C	YNL156C				YOL070C	YGL237C				YGL026C	YPR034W				YDR148C	YDR017C									YDR380W	YKL215C				YLR256W	YEL007W				YDR372C	YHL015W				YLR355C	YPL243W
	YHR063W-A	YDR129C				YIR001C	YOR110W				YDL234C	YMR288W				YOL078W	YGR156W									YOR317W	YLR187W				YDR097C	YGL207W				YHR065C	YNL097C				YNL005C	YDR145W
	YPL023C	YGR281W				YDR150W	YOL111C				YKL175W	YJR017C				YLR139C	YJR045C									YDR072C	YLR203C				YNL071W	YAL042W				YMR235C	YHR136C				YOR327C	YPL090C
	YHR032W	YGL087C				YJR007W	YER061C				YER062C	YBR058C				YIL145C	YAL029C									YIL039W	YBR212W				YJR016C	YGL245W				YKL028W	YBL003C				YPL090C	YPR137W
	YIL088C	YPL235W				YOR017W	YNL288W				YLR347C	YMR165C				YPR181C	YHR123W									YLR034C	YBR149W				YCL009C	YLR305C				YDL207W	YOR158W				YLL027W	YLL027W
	YDR119W	YHL030W				YOL071W	YGL236C				YJL198W	YDR036C				YER172C	YOR219C									YKL046C	YMR297W				YMR237W	YLR203C				YOR167C	YGL135W				YOR281C	YNL155W
	YDR002W	YLR372W				YHR108W	YOR290C				YKR046C	YIL145C				YJL208C	YCL009C									YKL148C	YKL207W				YLR109W	YIR035C				YJL191W	YLL032C				YLL036C	YJL050W
	YDR276C	YHR027C				YFR048W	YJL198W				YCR081W	YKL212W				YNL118C	YNR011C									YIL023C	YIL123W				YIL030C	YJL001W				YOR021C	YMR240C				YBR057C	YDL166C
	YOR360C	YGL201C				YMR005W	YGL210W				YDR072C	YCL017C				YGR036C	YOL073C									YEL060C	YKL126W				YCR048W	YGR260W				YBR195C	YDL122W				YPR137W	YOL016C
	YOR181W	YDL134C				YHR025W	YJL076W				YKR096W	YDL140C				YCL037C	YPL048W									YOL155C	YER019W				YHR165C	YLR398C				YDR465C	YOR327C				YLR286C	YLR065C
	YHR057C	YNR035C				YGL039W	YGL226W				YEL015W	YLR095C				YLR300W	YLR118C									YGR260W	YGL167C				YFL037W	YDL126C				YFL046W	YNL206C				YLR065C	YJL033W
	YPL208W	YPR080W				YGR198W	YLR300W				YDR301W	YFL033C				YKL029C	YLR256W									YLR178C	YHR113W				YPL085W	YDR155C				YHR072W-A	YDL191W				YJL033W	YDR035W
	YBL001C	YFL048C				YOR022C	YDR226W				YML031W	YMR272C				YMR272C	YKR096W									YML070W	YDR046C				YCR013C	YKR066C				YER006W	YDL131W				YOR119C	YBL024W
	YNR016C	YGL195W				YML130C	YGL101W				YER165W	YLR203C				YDR310C	YIL047C									YDR476C	YJR143C				YKR042W	YMR080C				YMR312W	YKL041W				YPR086W	YHR040W
	YHL030W	YGR282C				YDR506C	YIL079C				YEL042W	YDR430C				YPL048W	YNL054W									YAL005C	YGL137W				YOR285W	YPR159W				YGL011C	YIL044C				YJR145C	YLL036C
	YKR076W	YGR119C				YOR188W	YDR330W				YHR205W	YGR055W				YPL183C	YGR217W									YKR066C	YGR284C				YNL271C	YKL051W				YBR242W	YNL166C				YHR040W	YER095W
	YPL271W	YAL016W				YKL204W	YLR186W				YPR042C	YLL031C				YJL198W	YER019W									YHL017W	YDR508C				YIL022W	YHR020W				YDR070C	YHR169W				YFL002C	YLR286C
	YGL207W	YLL048C				YCR033W	YPL085W				YDL140C	YEL031W				YPL247C	YLR300W									YML128C	YIR006C				YOR063W	YBR031W				YMR033W	YMR058W				YMR239C	YJR019C
	YLR055C	YNL139C				YMR038C	YHR206W				YKL039W	YHR188C				YKR046C	YDR330W									YMR145C	YHL030W				YDR420W	YGL012W				YNL292W	YGR103W				YOL016C	YLR355C
	YDR206W	YOR311C				YPL085W	YER120W				YNL049C	YEL042W				YIL033C	YLR347C									YMR238W	YOR197W				YFR024C-A	YJR059W				YOR294W	YHL029C				YKR014C	YOR327C
	YDL168W	YPR060C				YJL042W	YPL049C				YJL208C	YER165W				YDR525W-A	YKL210W									YPL048W	YAL040C				YPL184C	YIL011W				YIL091C	YOR210W				YER082C	YLR074C
	YJL136C	YKL139W				YDR463W	YOL071W				YOR342C	YPL259C				YPR063C	YDR293C									YGL198W	YPL221W				YCR073W-A	YMR219W				YNL244C	YOR004W				YHL029C	YOR119C
	YDR450W	YJL008C				YGL197W	YPL177C				YDR061W	YMR083W				YDR379W	YMR162C									YPR154W	YJL002C				YNL219C	YIL047C				YOR244W	YCL050C				YPL202C	YLR356W
	YDR129C	YLR207W				YPL226W	YDR150W				YFR037C	YBR140C				YBL104C	YJL208C									YLR342W	YJL016W				YKR089C	YBR170C				YDR396W	YGL035C				YEL036C	YDR468C
	YHR021C	YKR028W				YIL079C	YER035W				YML008C	YGL127C				YML008C	YCR033W									YMR008C	YKL032C				YAL021C	YDR432W				YMR121C	YPR125W				YDR486C	YJR145C
	YER145C	YDR150W				YBR131W	YOR017W				YEL060C	YDR326C				YNL221C	YGR271W									YLR378C	YDR188W				YGR026W	YML078W				YMR295C	YDL207W				YNL155W	YMR239C
	YBR222C	YOR336W				YDL045W-A	YCR033W				YMR083W	YLR291C				YBR007C	YDR148C									YEL027W	YHR102W				YOL049W	YLR028C				YER122C	YNL113W				YER068W	YPR060C
	YPR095C	YBR080C				YGL105W	YGL105W				YNL322C	YBL023C				YIL129C	YLR399C									YGL006W	YAL042W				YDL125C	YDR335W				YPR075C	YIL083C				YGR005C	YPR086W
	YNL156C	YOR290C				YDR003W	YMR038C				YNR031C	YMR006C				YGR184C	YOR098C									YLL040C	YGL077C				YKL146W	YPL197C				YOR119C	YKL120W				YPL232W	YKL154W
	YPR080W	YGR185C				YIL126W	YFR048W				YGR156W	YDR159W				YCL045C	YNL049C									YDR127W	YPL023C				YCL011C	YNL243W				YDL053C	YCL031C				YJR019C	YLR325C
	YHR027C	YDR238C				YMR287C	YKL059C				YIL074C	YER013W				YKL182W	YNL239W									YDR342C	YDR293C				YOR065W	YOR108W				YLR309C	YDR071C				YGR095C	YHL029C
	YFR006W	YKL175W				YJR109C	YCL050C				YJL063C	YNL311C				YGL040C	YHR205W									YAL023C	YBR218C				YDL145C	YNL071W				YPR037C	YJL168C				YPR060C	YKR014C
	YLR344W	YER089C				YDR244W	YDR070C				YER132C	YGR202C				YDR233C	YPR181C									YGL040C	YLR027C				YDL185W	YLR342W				YGL030W	YOR167C				YDR468C	YGR005C
	YPL079W	YBL051C				YOL021C	YOL021C				YCL005W-A	YBR030W				YMR221C	YIL034C									YBR286W	YKL146W				YDL171C	YML115C				YLR448W	YGR208W				YEL071W	YJL009W
	YKL160W	YFL004W				YOR330C	YDR227W				YBL033C	YBR039W				YGR097W	YGR056W									YNR017W	YBR170C				YGR271W	YIL030C				YIL116W	YIR026C				YMR091C	YPL202C
	YDR057W	YAR002C-A				YOL111C	YKL204W				YJR066W	YPL169C				YEL043W	YMR165C									YLR055C	YDR036C				YML086C	YMR261C				YLR215C	YDL201W				YKL154W	YFL002C
	YBR129C	YNL118C				YER134C	YIL126W				YLR429W	YJL082W				YNL108C	YGL008C									YLR120C	YAL021C				YDR135C	YKL006W				YDL048C	YDL053C				YGL078C	YMR005W
	YMR318C	YNL216W				YDL173W	YER167W				YGR233C	YML059C				YKL211C	YER172C									YNR019W	YJR103W				YHR032W	YLR256W				YIL109C	YPL232W				YPL050C	YGR081C
	YDL205C	YMR067C				YKL059C	YBR131W				YLR027C	YOR330C				YNL322C	YPL226W									YGR138C	YLL015W				YOR317W	YKL046C				YOR307C	YDR113C				YMR005W	YNL162W
	YDL178W	YNL005C				YML041C	YPL249C-A				YLL029W	YLR113W				YOR071C	YIL145C									YHR042W	YJR121W				YLL024C	YBL101C				YER105C	YKL113C				YLR243W	YLR243W
	YLR170C	YKL212W				YFR030W	YPR137W				YLR432W	YJL198W				YPL274W	YPL183C									YOR329C	YDL185W				YOL090W	YBR115C				YBR074W	YIR011C				YBR068C	YDR471W
	YLR129W	YER020W				YGL100W	YDR113C				YHL007C	YOR098C				YPL226W	YGL040C									YBR115C	YBL037W				YDR150W	YHR165C				YBR059C	YOR091W				YJL054W	YPL232W
	YOR039W	YDL173W				YJL084C	YNL263C				YKL211C	YLR115W				YBR041W	YJL192C									YMR173W-A	YIL033C				YFR044C	YMR237W				YML103C	YFL046W				YAR002W	YJL054W
	YKR014C	YGL003C				YBR246W	YIR001C				YER057C	YER064C				YOR221C	YMR272C									YLL031C	YCL057W				YHR135C	YHR026W				YDR293C	YIL118W				YJL009W	YPL050C
	YDR005C	YCL049C				YER035W	YOR022C				YLR256W	YJR059W				YBR261C	YKL029C									YJL196C	YDL095W				YGL008C	YMR143W				YDL052C	YNL131W				YLR325C	YER068W
	YBR262C	YAL021C				YPL177C	YDR003W				YDR174W	YLR432W				YDR159W	YGR036C									YJR091C	YOR002W				YKL150W	YNL271C				YLR250W	YMR312W				YLR121C	YBL072C
	YOR310C	YLR410W				YOL072W	YOR191W				YOR071C	YDR322W				YCL009C	YPR063C									YKL129C	YML075C				YLR034C	YJR016C				YGL140C	YLR367W				YGR175C	YER082C
	YGR281W	YJR003C				YLR300W	YML130C				YML010W	YDR420W				YPL169C	YLR139C									YOR153W	YHR028C				YNR017W	YPL085W				YPL091W	YKR025W				YGR081C	YGR095C
	YGL037C	YDR322W				YPR137W	YDL240W				YMR296C	YKL020C				YHR216W	YCL037C									YDL140C	YMR110C				YDL168W	YDL048C				YAL026C	YDR245W				YJR144W	YEL036C
	YDL134C	YDL047W				YER167W	YDR244W				YFL048C	YGL026C				YIL115C	YDR310C									YDL215C	YDR349C				YPL262W	YOR063W				YLR410W	YCR013C				YDR471W	YMR091C
	YGR037C	YDR353W				YNL216W	YMR287C				YHR207C	YML008C				YPR034W	YKR046C									YDR420W	YGR097W				YBR218C	YFR024C-A				YMR143W	YPL050C				YBL072C	YGL078C
	YHR042W	YJR060W				YCL017C	YJR109C				YPL050C	YMR222C				YJL207C	YBR261C									YHR026W	YMR015C				YLL048C	YDR420W				YMR145C	YJL191W				YFR028C	YAR002W
	YNL039W	YOR090C				YFL013C	YKL146W				YOL103W	YKL039W				YGL219C	YNL118C									YGL126W	YCR073W-A				YDR388W	YOR285W				YJL099W	YOR244W				YNR050C	YBR068C
	YGL201C	YPL199C				YKL155C	YGR198W				YOR260W	YPL183W-A				YLR430W	YJL198W									YDR432W	YBR140C				YKR046C	YCR048W				YEL013W	YBR122C				YLR387C	YJR144W
	YMR071C	YJL054W				YLR397C	YMR005W				YBL067C	YCL049C				YGR233C	YHR036W									YIL101C	YEL032W				YPL023C	YJR077C				YGR014W	YLR309C				YPL211W	YHR195W
	YLR114C	YLR186W				YHR127W	YDL045W-A				YLR420W	YIL074C				YHL034C	YKL211C									YFR019W	YJR059W				YBR234C	YCL009C				YDR128W	YLR344W				YDR372C	YLR387C
	YLR372W	YLR291C				YLR419W	YLR086W				YLR150W	YEL060C				YDR135C	YML008C									YER011W	YGL195W				YML008C	YAL021C				YPL183C	YPL093W				YGR208W	YLR224W
	YBR151W	YGR278W				YPL069C	YHR127W				YOL054W	YER062C				YMR006C	YNL221C									YKR067W	YHR098C				YDL086W	YKR089C				YMR231W	YLR110C				YHR052W	YJL140W
	YDL124W	YMR005W				YDR113C	YBR246W				YDL100C	YJR049C				YDR205W	YDR233C									YCL009C	YJL062W				YDR012W	YDL145C				YJR117W	YDR226W				YNL162W	YKR006C
	YBR235W	YDR326C				YLR226W	YMR142C				YDL122W	YKR046C				YMR296C	YOR042W									YOR356W	YNL045W				YNR013C	YIL022W				YLR020C	YKL028W				YHR085W	YLR121C
	YGL195W	YML076C				YKR060W	YER134C				YDR245W	YHR205W				YDR420W	YKL182W									YGR088W	YER069W				YMR109W	YDL185W				YKR093W	YPL043W				YFL005W	YLR395C
	YGR282C	YDR025W				YKL023W	YCR057C				YPR148C	YEL043W				YGR244C	YOR204W									YKL051W	YBR139W				YIL043C	YNR016C				YPR022C	YMR260C				YOR344C	YDR372C
	YLR020C	YPL082C				YLR086W	YOL072W				YML048W	YMR296C				YMR313C	YBR007C									YJR127C	YBR074W				YMR012W	YLR109W				YFR018C	YHR021C				YJL152W	YGL209W
	YLR390W-A	YDR182W				YDL240W	YNL233W				YPL195W	YDL042C				YMR149W	YMR296C									YHR039C	YLR241W				YLR088W	YCL011C				YDR089W	YCL029C				YHR203C	YMR142C
	YPL235W	YKL039W				YKL146W	YCL017C				YDL078C	YNL049C				YDR011W	YGR184C									YIL136W	YBR026C				YAL029C	YKL146W				YJL042W	YNL292W				YBL036C	YLR292C
	YJL196C	YBL084C				YKL054C	YDR035W				YDL165W	YJR066W				YNR013C	YPL274W									YGL062W	YML078W				YNR014W	YGR026W				YDL171C	YDR396W				YMR142C	YGR208W
	YGL087C	YHR203C				YMR172W	YLR226W				YER107C	YML031W				YFL010C	YIL051C									YJL005W	YKL204W				YMR214W	YGR271W				YOR086C	YNL099C				YLR224W	YOR344C
	YNL101W	YOL021C				YDR229W	YFR030W				YOR238W	YGR233C				YOR204W	YIL129C									YCR077C	YDR457W				YFR051C	YOR065W				YER090W	YMR033W				YLR356W	YFR028C
	YNR035C	YER008C				YGR056W	YER027C				YBR084C-A	YPL188W				YLR069C	YHR216W									YNR016C	YKR089C				YDL190C	YDR135C				YBL030C	YDR051C				YLR292C	YHR203C
	YBR191W	YLR115W				YNL263C	YOR027W				YNL301C	YCR081W				YNR018W	YBR208C									YOR161C	YLR414C				YHL030W	YDL171C				YNL085W	YPL129W				YJL140W	YHR085W
	YDL192W	YGR004W				YML099C	YGL100W				YNL255C	YLR256W				YLR172C	YDR420W									YOR374W	YDR047W				YBR159W	YDL125C				YBL047C	YGR180C				YGR083C	YGR175C
	YNL234W	YER062C				YER019W	YOR330C				YPR103W	YBR021W				YLR027C	YMR006C									YCR017C	YNL330C				YNL102W	YOL049W				YLR371W	YDR465C				YER118C	YHR052W
	YDR039C	YPL128C				YPL089C	YNL216W				YNL069C	YDL234C				YGL140C	YDR379W									YHR137W	YJR124C				YJR091C	YNL219C				YPR021C	YCR035C				YGR013W	YBL036C
	YFL048C	YIL130W				YCR052W	YKR060W				YGL091C	YGR086C				YGL195W	YNL322C									YDR481C	YPR159W				YPR080W	YCR073W-A				YKL185W	YBR242W				YKR006C	YJL189W
	YCR036W	YJL145W				YER161C	YDR229W				YBR143C	YJL208C				YOR342C	YMR149W									YMR054W	YNR008W				YER070W	YFL037W				YGL091C	YDR311W				YPL217C	YPL001W
	YHR065C	YNL315C				YDR487C	YDL173W				YJL152W	YDR301W				YOR323C	YMR221C									YPL184C	YLL001W				YBR196C	YDR150W				YDL054C	YDR153C				YPL118W	YGR013W
	YGR135W	YGL107C				YOR042W	YDR463W				YML069W	YPR042C				YPR183W	YNL108C									YER150W	YJR109C				YOL086C	YDR097C				YHR102W	YHR072W-A				YBR048W	YFL005W
	YHR026W	YGR233C				YBR068C	YDR487C				YJL014W	YLL029W				YOL052C	YGR233C									YJL159W	YJR126C				YMR205C	YML086C				YOR116C	YPL266W				YIL154C	YPL211W
	YGR119C	YDR092W				YNL035C	YKL019W				YKL214C	YOR342C				YAL026C	YPL169C									YOL020W	YLL024C				YCR093W	YOR317W				YIL145C	YBR195C				YLR395C	YOR244W
	YAL016W	YCR059C				YDR485C	YLR106C				YJR047C	YKL211C				YOR371C	YGL140C									YHR032W	YOR109W				YGL027C	YHR032W				YBL051C	YLR215C				YFL010W-A	YFL010W-A
	YCR044C	YLR293C				YKL022C	YKL054C				YMR226C	YER057C				YJL026W	YBL104C									YNL321W	YDR345C				YNR001C	YCR013C				YBR084W	YDR372C				YOR259C	YEL071W
	YOR317W	YHR025W				YPL249C-A	YKL042W				YJR068W	YDL165W				YJL097W	YLR027C									YDR074W	YGL026C				YDR129C	YKL150W				YHR216W	YDL051W				YDR346C	YJR085C
	YLL048C	YIL083C				YHR208W	YMR172W				YBL087C	YNL323W				YLR241W	YBR041W									YDR040C	YIL109C				YMR054W	YBR218C				YDR137W	YOL080C				YHR195W	YLR038C
	YKL181W	YGR162W				YHL038C	YOR299W				YGR253C	YGL091C				YDL140C	YNR018W									YGR248W	YMR105C				YMR278W	YFR044C				YNL325C	YGR148C				YLR038C	YER118C
	YML048W	YOL013C				YPR040W	YHR208W				YJR105W	YPR113W				YLR429W	YIL115C									YBR126C	YPL197C				YKL035W	YPL262W				YOR270C	YGR167W				YOR271C	YJL152W
	YHR005C-A	YJR080C				YOR171C	YML041C				YGR093W	YDL236W				YMR208W	YDR135C									YLL028W	YAR042W				YHR113W	YDR388W				YGR178C	YDR429C				YKL216W	YGR083C
	YOR194C	YCR081W				YML076C	YLR419W				YER022W	YKL214C				YBR200W	YOR071C									YBR241C	YBR222C				YGR240C	YLL048C				YBL017C	YNL244C				YPL001W	YIL154C
	YBR042C	YDL086W				YOR299W	YPL104W				YGR148C	YBR014C				YHR206W	YPR034W									YER119C	YIR036C				YDL124W	YHR135C				YER155C	YKR035C				YER056C-A	YPL118W
	YGL181W	YML126C				YDR035W	YFL013C				YDR304C	YLR285W				YIL046W	YHL034C									YPL006W	YFR051C				YBR212W	YMR109W				YHR098C	YBL098W				YGL070C	YNL151C
	YBR106W	YHR128W				YDR070C	YKL155C				YDL236W	YOL038W				YPR074C	YIL033C									YNL115C	YMR276W				YNL134C	YMR012W				YJL134W	YIL116W				YOR244W	YKR029C
	YGR214W	YLR436C				YKL042W	YPL069C				YER094C	YGR093W				YMR219W	YOL052C									YBR056W	YDR001C				YJL079C	YBR234C				YGR218W	YGR245C				YGL171W	YGL070C
	YOL149W	YIL005W				YPL094C	YML099C				YHL011C	YLR075W				YPL110C	YDR011W									YIL108W	YER113C				YGL167C	YNR013C				YOR153W	YBR095C				YDL060W	YNL113W
	YPL218W	YLR305C				YLR115W	YPL094C				YIL020C	YER148W				YLR088W	YJL026W									YJR001W	YLR438W				YML072C	YKR046C				YLR034C	YOR238W				YNL113W	YBR048W
	YDR513W	YER027C				YKL019W	YPL089C				YER072W	YGR232W				YNR033W	YOR323C									YOL129W	YKR046C				YDL029W	YNR017W				YDL189W	YDR043C				YNL166C	YPL217C
	YDR335W	YIL142W				YCR057C	YDL193W				YNL323W	YMR242C				YER105C	YJL097W									YLR258W	YBR036C				YPL004C	YIL043C				YMR086W	YPL198W				YJR085C	YOR259C
	YER136W	YER035W				YNR033W	YLR115W				YDR434W	YGR246C				YJL082W	YPR074C									YLR337C	YOL122C				YMR297W	YML008C				YGL161C	YDR167W				YGL019W	YNL166C
	YER148W	YMR004W				YNL217W	YER019W				YOR246C	YOR246C				YOL051W	YDR159W									YGL156W	YBL007C				YKL204W	YPL023C				YMR258C	YBR181C				YPL235W	YKR023W
	YGL114W	YDR244W				YJL054W	YHR030C				YPR113W	YER123W				YGL213C	YCL045C									YCL040W	YNL134C				YOR290C	YDL086W				YLR299W	YOR232W				YNL035C	YGL171W
	YER021W	YIL126W				YLR106C	YOR171C				YCR071C	YML004C				YGL129C	YFL010C									YMR250W	YEL046C				YHR098C	YAL029C				YCL045C	YER006W				YNL208W	YNL035C
	YJR040W	YOR110W				YLR291C	YLR291C				YLR285W	YBL055C				YBR263W	YLR241W									YML100W	YGL084C				YLR348C	YDL168W				YNR001C	YHR065C				YGR012W	YNL208W
	YPR023C	YGL219C				YJL008C	YKL023W				YER122C	YCR071C				YMR079W	YDR205W									YPR160W	YNR030W				YKL157W	YHL030W				YJR045C	YIL093C				YGL209W	YDL060W
	YMR054W	YDR093W				YNL233W	YBR007C				YOR063W	YCR036W				YBR079C	YPR183W									YMR196W	YLL048C				YML085C	YPL184C				YGL077C	YGR004W				YGL244W	YDR346C
	YOL026C	YKR006C				YMR142C	YHL038C				YLR185W	YLR066W				YDL042C	YLR069C									YOR291W	YIL153W				YDL140C	YDR012W				YEL046C	YOR021C				YDR429C	YKL216W
	YJR124C	YIL051C				YHR030C	YJL066C				YGR232W	YOL061W				YOR233W	YEL043W									YDR384C	YHR033W				YOR109W	YDL190C				YHR103W	YCR005C				YKR029C	YER056C-A
	YMR297W	YPR072W				YER027C	YBR068C				YER148W	YNL166C				YIL053W	YDL140C									YDR406W	YGR254W				YBL045C	YDR129C				YNL007C	YPR037C				YKR080W	YKL110C
	YPL190C	YKL032C				YGR091W	YOR042W				YDR190C	YOR281C				YER027C	YMR313C									YBR214W	YGL012W				YLR154W-B	YCR093W				YLR301W	YMR295C				YMR310C	YGR012W
	YPL055C	YMR193W				YDR182W	YGR056W				YDL134C	YBR106W				YIL074C	YBR079C									YDL222C	YLR256W				YJR143C	YFR051C				YGR260W	YGL011C				YPL210C	YOR221C
	YGR191W	YDR159W				YPL104W	YML076C				YML073C	YKR063C				YEL032W	YJL207C									YJR073C	YPR156C				YOL020W	YLL024C				YMR102C	YPR075C				YLR195C	YOR340C
	YNL048W	YNR006W				YNL232W	YCR052W				YKL181W	YPR069C				YJR059W	YER027C									YDL223C	YNL241C				YLL015W	YKL035W				YLR304C	YOR294W				YGR214W	YOR271C
	YIL039W	YNL108C				YNL137C	YOR204W				YOL038W	YKR026C				YGL238W	YBR263W									YNL143C	YGR199W				YGL157W	YNR001C				YGR141W	YPL090C				YBR171W	YGL019W
	YOR197W	YML110C				YPR072W	YJR145C				YBL055C	YER174C				YOL005C	YAL026C										YKL203C				YIL039W	YJR091C				YLR375W	YHR085W				YKL027W	YGR214W
	YMR278W	YGL105W				YDL193W	YJL008C				YER123W	YDR023W				YCR084C	YIL046W										YPR113W				YAL038W	YMR214W				YLR241W	YPL131W				YNL131W	YKR080W
	YER072W	YGR012W				YLR219W	YKR025W				YLR196W	YJL156C				YMR203W	YJL082W										YDL022W				YKL100C	YLR088W				YBR001C	YKL089W				YKL110C	YMR067C
	YGL112C	YIR001C				YOR027W	YNL035C				YLR066W	YGR132C				YLL021W	YEL032W										YDR276C				YHR008C	YMR205C				YPL023C	YLR455W				YHR034C	YDR429C
	YAR014C	YDR049W				YKR025W	YKL022C				YPL037C	YMR161W				YOL021C	YLR088W										YDR011W				YHR104W	YDL124W				YLR337C	YER122C				YOR340C	YKL027W
	YOR370C	YMR109W				YKL048C	YNR033W				YDL192W	YBL092W				YBR248C	YGL195W										YGR281W				YLR389C	YBR159W				YKR018C	YMR121C				YOR117W	YBR002C
	YBL050W	YGL210W				YBR007C	YKL039W				YER174C	YGL110C				YHR113W	YNR013C										YMR318C				YIL137C	YMR054W				YPR028W	YDL074C				YBR002C	YGL244W
	YDR023W	YBR021W				YMR288W	YDR485C				YGR246C	YER009W				YGR162W	YMR208W										YJR016C				YKL085W	YGR240C				YGR184C	YGL211W				YLR059C	YGL189C
	YFR050C	YNL263C				YGR120C	YDL086W				YCR036W	YLR243W				YKR079C	YOL051W										YNL322C				YLR430W	YPR080W				YPL015C	YOR250C				YPL266W	YBR171W
	YJR006W	YMR288W				YPL029W	YOR092W				YLR249W	YOR078W				YKR087C	YNR033W										YER017C				YFL034C-A	YGL008C				YBR054W	YBR057C				YLR172C	YHR034C
	YIL154C	YIL074C				YER008C	YJR017C				YEL051W	YMR212C				YMR100W	YIL053W										YER088C				YMR015C	YHR113W				YNL330C	YMR044W				YIL044C	YLR195C
	YBR236C	YJR113C				YDL086W	YGR091W				YGR186W	YDL178W				YJR052W	YOR371C										YDL195W				YAL037C-B	YML072C				YBR006W	YIL091C				YGL189C	YPL235W
	YGL244W	YPL145C				YDR239C	YPR072W				YJL156C	YHR077C				YML048W	YPL110C										YDR206W				YGR178C	YDR093W				YKR065C	YNL022C				YNL255C	YIL093C
	YOL145C	YDL045W-A				YOR092W	YER161C				YOR310C	YPL213W				YNR052C	YOR342C										YML059C				YGL206C	YGL027C				YNL102W	YOR119C				YNL265C	YNL131W
	YHR063C	YDR054C				YKL039W	YNL232W				YOR078W	YOR039W				YJL111W	YER105C										YJL079C				YBR059C	YBR212W				YMR015C	YPR051W				YOR221C	YOR117W
	YKL077W	YLR185W				YDR061W	YGR040W				YMR116C	YML067C				YMR212C	YER165W										YMR272C				YDR119W	YMR297W				YNL139C	YCR002C				YKR023W	YDR175C
	YCR073W-A	YBR011C				YDR322W	YNL137C				YGL110C	YOR362C				YNL067W	YIL074C										YDR380W				YGL040C	YMR278W				YOR370C	YNL229C				YMR067C	YNR003C
	YHR193C	YOR147W				YML015C	YJL054W				YDR311W	YDR311W				YGR052W	YHR206W										YCR048W				YAL023C	YDL029W				YEL032W	YAR002W				YLR332W	YIL116W
	YOR335C	YBR246W				YDR174W	YDR182W				YDL178W	YFR006W				YDR023W	YMR219W										YOL059W				YGL022W	YOL086C				YDR148C	YKR060W				YHR197W	YDL117W
	YHR028C	YMR313C				YDL207W	YGR120C				YML004C	YPL239W				YIL104C	YMR203W										YKR066C				YJL002C	YBR196C				YLR328W	YLR002C				YNL151C	YIL044C
	YLR387C	YPL232W				YAL044C	YOR066W				YER055C	YLL045C				YCL011C	YGL213C										YJR104C				YHR042W	YKL157W				YDL145C	YDR054C				YML012W	YNL265C
	YPL087W	YCR093W				YOR132W	YMR288W				YGR132C	YJL178C				YOR260W	YOL005C										YOR317W				YML056C	YJL052W				YHR186C	YMR235C				YER156C	YLL010C
	YMR235C	YLR118C				YBR082C	YPR183W				YKL117W	YJR074W				YFL010W-A	YOL021C										YKL148C				YDL095W	YLR034C				YKR066C	YLR175W				YOR123C	YKL160W
	YDL078C	YIR004W				YHR064C	YLR219W				YBL027W	YPL206C				YJR069C	YOR233W										YPL231W				YIR006C	YGL167C				YDR284C	YOR195W				YER035W	YMR310C
	YJR142W	YDR138W				YJR017C	YML032C				YLR243W	YJL055W				YOR051C	YGL129C										YJL171C				YJL080C	YKL204W				YDR456W	YPL225W				YIL093C	YNR006W
	YCL049C	YGR208W				YOR066W	YPL029W				YJR074W	YBR236C				YML016C	YGR162W										YPL154C				YGR244C	YNL134C				YGL225W	YGL171W				YIL116W	YLR059C
	YER020W	YHR070W				YJR145C	YDR239C				YGL189C	YNR035C				YDR211W	YEL046C										YML070W				YOR142W	YHR098C				YOL122C	YIL064W				YDR175C	YOL080C
	YDR353W	YDR240C				YML032C	YKL048C				YHR089C	YMR178W				YLR243W	YDL042C										YJL101C				YKL210W	YDL140C				YNL161W	YML092C				YLL010C	YLR332W
	YML076C	YHR206W				YDR017C	YGR285C				YIL136W	YDL125C				YKR025W	YJR077C										YGR260W				YLR154C-G	YOR290C				YDL015C	YER048C				YOR001W	YML073C
	YJL054W	YDR518W				YKL175W	YLR305C				YER009W	YDR064W				YMR091C	YBR248C										YPL048W				YLL028W	YPL004C				YER044C	YJL010C				YML073C	YPL210C
	YBL084C	YOR091W				YFR028C	YOR132W				YLR075W	YGL044C				YHL034W-A	YPL154C										YJL172W				YKL010C	YOR109W				YGL207W	YGL219C				YNR003C	YOR123C
	YDR326C	YDR017C				YLR305C	YMR109W				YJL143W	YOR061W				YJR144W	YJR059W										YLL040C				YOL081W	YJR143C				YDR206W	YOR259C				YGR020C	YML012W
	YLR115W	YCR046C				YOL051W	YDR061W				YKR026C	YIL064W				YML069W	YLR335W										YJL141C				YNL160W	YLL015W				YHR204W	YDL150W				YGL100W	YGL211W
	YER027C	YKL104C				YPR183W	YOL051W				YMR242C	YML007W				YGL023C	YMR079W										YIL039W				YLR076C	YLR348C				YJL080C	YMR311C				YLR229C	YDL075W
	YGR162W	YMR038C				YGR040W	YDR174W				YHR077C	YKL007W				YOR117W	YLL021W										YGL006W				YDR141C	YOL020W				YPL222W	YOR301W				YGL023C	YDL065C
	YDR092W	YNL310C				YLR193C	YDR322W				YPL239W	YNL010W				YJL087C	YGR086C										YDR072C				YBR149W	YKL100C				YKL126W	YML012W				YER123W	YOR210W
	YDL086W	YJR017C				YBR095C	YDL207W				YIL064W	YDR098C				YOR360C	YKL010C										YBL030C				YIL129C	YGL206C				YHR198C	YDR322C-A				YFR004W	YNL255C
	YIL142W	YJL149W				YMR109W	YHR064C				YBR236C	YDL147W				YKL077W	YDR182W										YDR127W				YBR139W	YML085C				YPR128C	YGL222C				YGR262C	YGL023C
	YJR003C	YPL084W				YDR138W	YKL034W				YBL072C	YKL094W				YML060W	YOR330C										YIL023C				YGL137W	YGL157W				YKR070W	YBR273C				YLL039C	YGR020C
	YGR233C	YLR087C				YDR326C	YFR028C				YIL103W	YJL006C				YOR243C	YLR153C										YGL008C				YHR072W	YHR008C				YEL042W	YDL147W				YGL211W	YPL266W
	YLR186W	YPR065W				YLR204W	YBR127C				YKL007W	YDR465C				YPR170W-B	YNR043W										YLR378C				YOL057W	YBL045C				YAL017W	YGR262C				YDL117W	YGR262C
	YDR330W	YGR285C				YGL003C	YER062C				YGL246C	YDR267C				YIR011C	YIL041W										YML128C				YBR169C	YGR178C				YHR029C	YHR203C				YNR006W	YHR197W
	YCR081W	YGR054W				YNL080C	YBR082C				YLR015W	YHR201C				YNL181W	YGR198W										YKL046C				YBR187W	YPL154C				YBR097W	YOL147C				YKL160W	YLR172C
	YGL107C	YNL054W				YKL034W	YLR293C				YBR106W	YKL013C				YLL034C	YBR286W										YHL017W				YJR121W	YLR389C				YNL336W	YGR158C				YGR089W	YOL056W
	YGR004W	YGL178W				YPL110C	YKL175W				YJL178C	YIL103W				YCR036W	YLR293C										YHR072W				YER011W	YDR119W				YJR138W	YML105C				YPL026C	YOR001W
	YLR305C	YDL193W				YIL046W	YGR080W				YGR147C	YBL050W				YPL050C	YHR208W										YLR342W				YBR229C	YHR042W				YIR006C	YFL038C				YIR011C	YPL026C
	YJL145W	YKR056W				YOR204W	YER008C				YFR006W	YLR015W				YLR319C	YML048W										YDR476C				YCR011C	YJL002C				YLR028C	YML114C				YDL201W	YGR089W
	YDR182W	YMR295C				YDR108W	YBR095C				YDR465C	YNL206C				YFL048C	YHR162W										YPR154W				YGL173C	YIL039W				YDR283C	YDL103C				YER013W	YLL039C
	YHR128W	YJR137C				YKR062W	YNL080C				YGR207C	YDR381W				YNR029C	YMR226C										YLR390W-A				YOL122C	YJL158C				YDR046C	YBR036C				YDL075W	YGL100W
	YNL315C	YDR379W				YLR293C	YIL046W				YMR074C	YJL001W				YJL178C	YJL111W										YBR286W				YCR077C	YBR059C				YGR271W	YMR237W				YLR222C	YER035W
	YJL010C	YJR014W				YGR285C	YDR138W				YJL055W	YIL062C				YMR223W	YDR211W										YLR178C				YAL061W	YHR104W				YNL048W	YOL137W				YKR047W	YER123W
	YIL083C	YCL005W-A				YMR312W	YPL110C				YDL212W	YPL143W				YGL172W	YML016C										YEL060C				YNL262W	YKR042W				YPL150W	YMR207C				YOL056W	YIR011C
	YNL263C	YGL129C				YKL077W	YGL003C				YDR427W	YMR074C				YNL247W	YDR023W										YKL182W				YJR117W	YIL137C				YGR038W	YDR180W				YHR065C	YLR229C
	YMR005W	YML130C				YGL196W	YGR208W				YOL061W	YPL079W				YJL001W	YOR260W										YAL023C				YOR124C	YKL085W				YBR286W	YKL174C				YOR196C	YFR004W
	YOL013C	YCR083W				YPL235W	YER089C				YOR061W	YLR395C				YDL192W	YJR144W										YGL040C				YJL172W	YGL022W				YBR281C	YML085C				YNL290W	YNL022C
	YLR293C	YPL173W				YGR261C	YOR224C				YPL206C	YPL053C				YJL125C	YKL077W										YEL027W				YBL017C	YNL102W				YBR170C	YMR314W				YNL022C	YER156C
	YER008C	YLR059C				YGR111W	YDR326C				YNR003C	YOL145C				YMR131C	YML069W										YNR017W				YCR017C	YLR430W				YJL127C	YOL155C				YDL065C	YDL201W
	YGL219C	YIL149C				YDR376W	YLR095C				YNL206C	YGL246C				YGR200C	YOR117W										YLR055C				YDL195W	YGL040C				YNR047W	YDR384C				YNL075W	YNL290W
	YER035W	YBR205W				YPL154C	YDR108W				YHR201C	YNL119W				YKL206C	YMR091C										YDL093W				YFL007W	YAL038W				YBR169C	YDR347W				YAL044C	YGR278W
	YJR080C	YIL093C				YLR420W	YAL044C				YPL143W	YPR016C				YLR066W	YGL172W										YJR077C				YDR457W	YOL090W				YGR232W	YDR335W				YER025W	YNL231C
	YKL032C	YML099C				YOR262W	YLR204W				YOL077C	YIL133C				YKL216W	YJR069C										YOR329C				YLL026W	YAL023C				YMR129W	YFL009W				YPR163C	YHR065C
	YBR011C	YOR299W				YOR194C	YHR175W				YJR025C	YER012W				YEL029C	YLL034C										YGL198W				YKL103C	YJL080C				YGR155W	YLR133W				YCL064C	YPR163C
	YIL130W	YFR030W				YGR028W	YBR084C-A				YDR382W	YNR003C				YEL017C-A	YKL216W										YJR091C				YNL280C	YKL210W				YIR038C	YBR218C				YDR447C	YLR222C
	YLR436C	YPR008W				YKL087C	YOR090C				YGR187C	YPR180W				YGR009C	YPR170W-B										YHR042W				YDR368W	YOL081W				YER014W	YAL051W				YML001W	YML071C
	YML110C	YBR267W				YCR011C	YLL027W				YER012W	YNL039W				YLR359W	YNL247W										YNR019W				YMR092C	YML056C				YBR102C	YHR047C				YJL001W	YER013W
	YIL126W	YCL050C				YJR006W	YOR219C				YCR090C	YOR332W				YBR143C	YLR249W										YLR034C				YHR174W	YGR244C				YCR077C	YMR319C				YHR102W	YMR242C
	YOR110W	YPL226W				YDL084W	YLR429W				YMR178W	YER099C				YGR095C	YFL048C										YLR154C-G				YBR286W	YFL034C-A				YJL109C	YGR244C				YKL051W	YOR196C
	YJR113C	YPL268W				YDL189W	YDR510W				YKL094W	YGR207C				YKL120W	YJL087C										YKR013W				YPL048W	YKL010C				YMR304W	YNL278W				YKR089C	YAL044C
	YNL108C	YBR002C				YHR026W	YDR192C				YLR395C	YGR074W				YOR145C	YGR200C										YDR420W				YPL163C	YIR006C				YNL280C	YER052C				YAL016W	YKR047W
	YMR004W	YOR042W				YDR237W	YGR013W				YDR267C	YHR193C				YCR035C	YJL125C										YGR055W				YHR099W	YOR142W				YGL227W	YPL084W				YBR170C	YNL075W
	YCR046C	YDR121W				YGR027C	YKL139W				YBR191W	YCR090C				YJR042W	YJL178C										YLL031C				YLR043C	YJL079C				YOL057W	YJL130C				YMR251W-A	YMR312W
	YIL051C	YOR359W				YBR129C	YML092C				YDR152W	YER102W				YHR027C	YBR143C										YJL196C				YML059C	YBR149W				YOL003C	YIL125W				YMR307W	YDL092W
	YDR244W	YIL070C				YJL014W	YLR019W				YDR098C	YPL197C				YJR072C	YJL001W										YKL129C				YCR088W	YDR141C				YDR080W	YGL022W				YLR337C	YBR030W
	YKR006C	YGR237C				YMR188C	YKR062W				YDR418W	YGR147C				YBL027W	YHR027C										YMR238W				YBR086C	YIL129C				YJR066W	YKR089C				YNR047W	YCL064C
	YGL105W	YGR198W				YBR183W	YJL180C				YGL200C	YNL067W				YOR281C	YBL027W										YBR115C				YML124C	YDL095W				YKL046C	YMR092C				YJR077C	YNL306W
	YPR072W	YGR181W				YGL233W	YOR311C				YBL092W	YHL013C				YMR194W	YGR009C										YOL155C				YBL007C	YGL137W				YNR017W	YNL100W				YIL005W	YJR093C
	YPL145C	YHR155W				YCR042C	YCL008C				YML094W	YGR027C				YPL037C	YOL123W										YOR153W				YLR304C	YNL160W				YDR105C	YLR436C				YFR047C	YCL050C
	YIL005W	YBR248C				YJL196C	YDL159W				YOR362C	YOL077C				YOL123W	YGR095C										YDL140C				YKL096W	YBR139W				YHR042W	YGL140C				YDL054C	YML007W
	YGL210W	YML053C				YCL035C	YCL028W				YNR035C	YLR387C				YNL004W	YKL120W										YDL215C				YIL033C	YMR015C				YNL026W	YLR398C				YPL262W	YKL065C
	YIL074C	YNL311C				YBL067C	YJL167W				YPR010C-A	YPL273W				YER022W	YJR042W										YOR356W				YML004C	YGL173C				YLR256W	YJL084C				YBR234C	YJL098W
	YKR056W	YER064C				YOL103W	YDR232W				YDR041W	YGR072W				YKR059W	YLR066W										YKL051W				YDR384C	YBR187W				YDR276C	YMR302C				YJL121C	YER025W
	YMR109W	YNR038W				YMR278W	YGL194C				YGR074W	YLR166C				YPL210C	YKR059W										YHR026W				YGR192C	YCR011C				YJL016W	YLR201C				YLR413W	YBR172C
	YHR070W	YOR066W				YER136W	YGR134W				YLR438C-A	YMR194W				YIL118W	YPL037C										YFR019W				YBR054W	YOL057W				YJL060W	YLR390W-A				YDR001C	YBR028C
	YIR001C	YER134C				YPL045W	YLR187W				YJL001W	YDR041W				YNL265C	YPL210C										YDR432W				YIL124W	YBR229C				YOR034C	YLR354C				YDR155C	YNL247W
	YLR185W	YOR201C				YMR022W	YJR090C				YPR180W	YKR080W				YNR035C	YER022W										YMR008C				YIL108W	YJR121W				YLR352W	YJL207C				YHR008C	YJR113C
	YNR006W	YMR043W				YER056C	YOR125C				YLR166C	YDR005C				YOL127W	YNL004W										YNR014W				YHR039C	YLR076C				YHR099W	YDR011W				YER143W	YER040W
	YPL226W	YGL213C				YNL101W	YGL178W				YPL053C	YBR302C				YDL122W	YDL122W										YJL158C				YLR378C	YLL028W				YPR155C	YHR123W				YLR305C	YMR062C
	YMR193W	YJL026W				YGL080W	YBR248C				YBR302C	YML132W				YDL100C	YDR190C										YJL005W				YIL034C	YHR072W				YOR336W	YIL047C				YBR023C	YKL114C
	YJR017C	YGR136W				YJL006C	YLR207W				YML132W	YHR012W				YER081W	YDL100C										YHR039C				YIL125W	YCR077C				YGL092W	YMR079W				YJR088C	YKL088W
	YGR012W	YOR171C				YMR238W	YBR289W				YPR016C	YDL083C				YDR190C	YMR194W										YLR120C				YDR127W	YBL017C				YPR191W	YER105C				YFR044C	YDL147W
	YDR054C	YML114C				YDL124W	YMR058W				YNL119W	YLR003C				YAL008W	YLR220W										YCL009C				YKR013W	YJR117W				YKL051W	YJR096W				YMR008C	YPL128C
	YBR246W	YOR219C				YOR362C	YPL042C				YBR066C	YMR263W				YOL142W	YPR113W										YAL005C				YGL195W	YBR169C				YPL087W	YML103C				YKR090W	YDR190C
	YDL045W-A	YGR193C				YGR216C	YCR042C				YNL039W	YBR166C				YDR398W	YNL265C										YLR044C				YIL109C	YOL122C				YCL024W	YBR166C				YGL140C	YAR002C-A
	YPL232W	YDR510W				YHR028C	YKL144C				YHL013C	YDR427W				YBR230C	YOL127W										YMR145C				YIR037W	YOR124C				YHR054C	YHR094C				YCR077C	YLR138W
	YMR288W	YNR046W				YML079W	YPL235W				YDR381W	YGR187C				YNL248C	YDR398W										YCR077C				YKL165C	YCR017C				YML004C	YBR052C				YMR071C	YDR398W
	YOR091W	YEL015W				YDR206W	YDL189W				YIL062C	YLL050C				YJL136C	YNL248C										YJR127C				YCL040W	YFL007W				YEL047C	YEL013W				YDR150W	YNL288W
	YDR240C	YPR137W				YBL056W	YOL103W				YBL050W	YCR003W				YDR005C	YMR033W										YGL126W				YNR030W	YDR457W				YNR011C	YPL045W				YBL034C	YGL120C
	YGR208W	YDL123W				YPR108W	YDR376W				YDR005C	YLR438C-A				YLR220W	YOL142W										YCR017C				YBR140C	YBR286W				YNL190W	YBR283C				YDR164C	YGL011C
	YLR118C	YNL053W				YJR042W	YPR095C				YHR012W	YGR267C				YNL207W	YPL265W										YDR481C				YDR222W	YDL195W				YIL002C	YNL271C				YDR415C	YHR049W
	YJR137C	YNL287W				YLR201C	YPR108W				YLL008W	YDL137W				YDL134C	YNL207W										YHR032W				YIL123W	YNL280C				YHR113W	YDR217C				YJR073C	YOR359W
	YDR017C	YPR129W				YNL234W	YJL196C				YDR023W	YPR170W-B				YPR113W	YDR497C										YGR088W				YJL005W	YMR092C				YER033C	YNL201C				YLR148W	YIL053W
	YDR159W	YER158C				YNL156C	YPL045W				YNL010W	YFL028C				YHL020C	YNR035C										YIL136W				YJL020C	YLL026W				YHR046C	YIL033C				YMR162C	YCR002C
	YJL149W	YLL010C				YCR077C	YER056C				YLR003C	YJL136C				YER103W	YDL134C										YMR054W				YHR087W	YPL048W				YBR003W	YIL129C				YBR058C	YPL131W
	YJR014W	YKL022C				YBL090W	YMR278W				YGR267C	YPL235W				YNL232W	YNL232W										YMR173W-A				YBR126C	YLR154C-G				YDL135C	YGR170W				YHR028C	YPR044C
	YOR299W	YMR140W				YML096W	YBL056W				YDL161W	YBR192W				YHR181W	YFL038C										YOL020W				YGR254W	YER070W				YGR177C	YBR059C				YOR069W	YIL064W
	YBR021W	YLL036C				YKL165C	YER136W				YDL137W	YLL008W				YNL336W	YNL119W										YHR137W				YDR032C	YHR099W				YDL113C	YOL081W				YGL026C	YJR003C
	YBR267W	YOR035C				YBR196C	YBR129C				YDR087C	YPL227C				YDR365C	YHL020C										YIL155C				YNL241C	YDR368W				YPR172W	YLR372W				YLR109W	YDL167C
	YMR038C	YOR027W				YJL134W	YOR362C				YDR064W	YBR066C				YMR033W	YJL136C										YNL321W				YJR066W	YBR086C				YDR457W	YBR074W				YKL201C	YJR060W
	YNR038W	YHR108W				YNL070W	YGL233W				YFL028C	YKR071C				YBR129C	YDR005C										YJL159W				YPR191W	YJL172W				YPL125W	YHL011C				YMR192W	YDR328C
	YDR138W	YMR170C				YGR170W	YOR194C				YLL045C	YLR257W				YCR009C	YOR361C										YGR138C				YMR110C	YKL103C				YEL029C	YAL026C				YIL014W	YLR433C
	YDR049W	YDL036C				YNL219C	YNL101W				YBR166C	YJR088C				YPL265W	YBR230C										YIL101C				YLR337C	YBL007C				YJL158C	YOR074C				YBR115C	YLR048W
	YCL005W-A	YOR081C				YGR105W	YMR022W				YDL157C	YMR044W				YGR027C	YOR196C										YNR016C				YCR012W	YML059C				YMR071C	YDR477W				YOR035C	YOR198C
	YPR065W	YNL239W				YIL075C	YMR238W				YER102W	YDR152W				YER026C	YGR027C										YER011W				YML075C	YCR088W				YNL297C	YNL055C				YNL135C	YJL138C
	YOR147W	YIR023W				YGL164C	YDR237W				YJR088C	YJR050W				YLR333C	YNL010W										YBR126C				YPL006W	YML124C				YAL002W	YGL012W				YGR055W	YDR394W
	YIR004W	YGR058W				YBR035C	YBR035C				YDR494W	YKL113C				YNL119W	YPL234C										YPL006W				YML070W	YLR043C				YMR013C	YOR307C				YLR241W	YOR095C
	YOR027W	YGR048W				YER174C	YML048W				YKR071C	YPR052C				YDR060W	YER136W										YDR074W				YGR284C	YLR304C				YOR155C	YBR067C				YDL052C	YOL040C
	YCR093W	YGL049C				YER113C	YML079W				YER099C	YPR010C-A				YDL150W	YGL228W										YER150W				YPR149W	YHR174W				YDR505C	YMR231W				YDL066W	YBR154C
	YGR285C	YMR146C				YDL089W	YKL087C				YDR272W	YGR085C				YPL234C	YBR129C										YPL184C				YBR056W	YIL033C				YPR115W	YKL008C				YOL060C	YLR033W
	YMR295C	YHR192W				YDR392W	YCR077C				YMR194W	YNL084C				YDR497C	YOR175C										YJR001W				YGL037C	YML004C				YMR047C	YLL024C				YJL019W	YBL081W
	YBR205W	YIL053W				YOR370C	YNL156C				YPR170W-B	YDR450W				YER136W	YLR333C										YNL115C				YCR030C	YAL061W				YGR240C	YJL159W				YDR367W	YDL174C
	YCR083W	YDR226W				YLL012W	YBR183W				YCR009C	YPR108W				YOR175C	YHR181W										YOR161C				YHR094C	YLR154W-B				YKL057C	YLR413W				YDR097C	YKR059W
	YPL084W	YKR096W				YLR015W	YGR262C				YNL084C	YML094W				YIL091C	YOL061W										YAL037C-B				YNL138W	YKL096W				YML017W	YMR165C				YAL002W	YJL200C
	YMR313C	YLR419W				YOR165W	YJR042W				YPL273W	YIL076W				YNL010W	YDL150W										YER119C				YJR001W	YLR378C				YBR225W	YMR297W				YHR026W	YHR196W
	YDL193W	YGL035C				YML048W	YIL075C				YLL050C	YDL235C				YGL228W	YNL336W										YBR241C				YOL155C	YNL262W				YPL270W	YDR128W				YPR159W	YML060W
	YLR059C	YNL252C				YGR260W	YGR170W				YPL227C	YDL161W				YGL231C	YDR060W										YLL028W				YIL101C	YGL195W				YDR141C	YLR250W				YNL267W	YPR110C
	YHR206W	YOR233W				YBR236C	YOR370C				YOL145C	YDL092W				YDR021W	YER140W										YLR154W-B				YOR086C	YDR127W				YLR259C	YLR371W				YBR041W	YNL048W
	YDR226W	YPL118W				YNL177C	YGR260W				YPL079W	YMR235C				YOR361C	YGL115W										YLR337C				YHR092C	YIL125W				YGL195W	YDR293C				YIL145C	YML001W
	YMR140W	YGL011C				YIR038C	YGL164C				YKL113C	YDR494W				YOR196C	YLR107W										YGR248W				YKL203C	YIL109C				YHL017W	YDR400W				YPL163C	YBR023C
	YGR211W	YKL034W				YNL119W	YJL134W				YDR110W	YNL157W				YGR214W	YKL027W										YBR056W				YNL321W	YHR039C				YDL019C	YIL109C				YBR275C	YBR170C
	YGR054W	YGR056W				YEL027W	YGL080W				YOR332W	YDL157C				YOR182C	YPR169W										YLR258W				YBR241C	YER011W				YMR247C	YPL091W				YGR026W	YLR413W
	YIL070C	YER006W				YDR533C	YDR392W				YHR193C	YKL114C				YDR272W	YKR042W										YML100W				YHR137W	YIL124W				YPL188W	YDR367W				YNR013C	YJL001W
	YPL262W	YGL197W				YDR514C	YML096W				YKL114C	YCR009C				YLR107W	YDR021W										YIL108W				YKL148C	YDR384C				YLR134W	YDL203C				YDR170C	YGR155W
	YOR066W	YGR150C				YLR114C	YBR236C				YPL170W	YLR407W				YDL137W	YDR361C										YGR069W				YDR074W	YIL034C				YNL219C	YDL052C				YDR251W	YGL140C
	YDL123W	YCR033W				YJR133W	YLL012W				YLR154W-B	YPR165W				YLR309C	YCR009C										YOL129W				YIL155C	YGR192C				YJL193W	YBR200W				YMR149W	YNR047W
	YBR248C	YDR405W				YNR012W	YLR114C				YLR147C	YKL065C				YBL038W	YNL178W										YMR196W				YNL115C	YIL108W				YPL048W	YOR185C				YDR237W	YDR150W
	YML099C	YNL121C				YPR170W-B	YGR119C				YNL067W	YML030W				YFL038C	YBL038W										YPR160W				YDR406W	YBR140C				YIL039W	YPR022C				YLR375W	YBR234C
	YIL149C	YDL131W				YGR119C	YNR012W				YGR027C	YOR253W				YPR169W	YJR105W										YCL040W				YNL045W	YCL040W				YLR422W	YJL099W				YCR048W	YKL051W
	YML053C	YOR191W				YJL203W	YDL015C				YPR052C	YKL174C				YOL061W	YOR039W										YOR291W				YPR028W	YAL037C-B				YDR531W	YMR214W				YDL004W	YHR083W
	YHR155W	YGR211W				YDR098C	YOR317W				YPL235W	YDR272W				YER140W	YHR077C										YMR250W				YFR053C	YJL020C				YDR430C	YBL051C				YJL039C	YMR251W-A
	YGL178W	YPL249C-A				YJR074W	YAR007C				YPL197C	YML074C				YDR361C	YJL014W										YGL062W				YIR038C	YIR037W				YAL023C	YCR011C				YGL008C	YKR089C
	YPR008W	YIL119C				YER102W	YJL178C				YIL133C	YCL035C				YJL048C	YGL231C										YDR384C				YCL057W	YJL005W				YGL040C	YLR410W				YDR128W	YCR077C
	YBR002C	YDR296W				YOR317W	YGL195W				YKL065C	YMR239C				YHR077C	YGR214W										YGL156W				YMR173W-A	YNR030W				YLR378C	YPL183C				YOR355W	YKR090W
	YGR181W	YBL099W				YPL022W	YNL177C				YJL136C	YLR447C				YKL027W	YNL255C										YHR092C				YBR214W	YBR126C				YKL210W	YBL047C				YLR207W	YJR088C
	YJL026W	YLR215C				YBR151W	YPL004C				YCL035C	YPL243W				YNL178W	YDL236W										YCR061W				YOL052C-A	YPL163C				YLR342W	YNL085W				YER166W	YBR058C
	YNL054W	YAR015W				YLR290C	YDL089W				YAL033W	YFR033C				YJR074W	YOL145C										YBR214W				YBR026C	YBR054W				YJR131W	YDR089W				YMR207C	YBL034C
	YDR121W	YOR032C				YJL178C	YER174C				YDR339C	YOL022C				YPR110C	YJR074W										YDL223C				YDL022W	YKL165C				YAR042W	YHR102W				YNL100W	YMR307W
	YOR359W	YGR204W				YLR352W	YOR165W				YML030W	YCR028C-A				YMR230W	YMR251W-A										YDR040C				YDL204W	YJR066W				YJR148W	YDL048C				YMR109W	YMR162C
	YDR379W	YAL032C				YDL083C	YMR218C				YKL067W	YKL067W				YDR381W	YKL030W										YOR374W				YLR258W	YML075C				YOR136W	YGR014W				YGL133W	YHR028C
	YPL173W	YAL003W				YLL058W	YNL070W				YDL083C	YMR022W				YNL166C	YHL011C										YDL222C				YMR105C	YLR337C				YMR261C	YER155C				YOR370C	YGL026C
	YGL129C	YDR044W				YDR027C	YPL022W				YLR257W	YHR181W				YMR251W-A	YPR110C										YPR184W				YAL005C	YNL241C				YMR176W	YBL017C				YJR065C	YFR044C
	YFR030W	YPL262W				YGR118W	YPR170W-B				YDR450W	YDR110W				YBR165W	YDL228C										YJR073C				YLR044C	YPL006W				YDR111C	YJR117W				YNL278W	YFR047C
	YGR237C	YDR158W				YLR066W	YNL119W				YML074C	YKL006W				YKR042W	YJL048C										YDR406W				YOR291W	YML070W				YJL070C	YOR086C				YIL070C	YDR001C
	YPL268W	YHR099W				YMR218C	YDR098C				YKR081C	YML022W				YDR494W	YNL166C										YNL143C				YOR356W	YPR191W				YBR243C	YMR012W				YMR006C	YOR069W
	YMR043W	YNL137C				YGL195W	YBL090W				YDR045C	YLR104W				YLR093C	YER100W										YLR061W				YMR304W	YMR110C				YBR159W	YNL139C				YOR063W	YJL121C
	YIL053W	YGL038C				YDR307W	YDL083C				YDR154C	YPL043W				YGL115W	YDR272W														YOR161C	YDR222W				YLR454W	YER090W				YMR080C	YMR008C
	YIL093C	YER183C				YDR276C	YLR066W				YHR181W	YDR087C				YLR447C	YDR381W														YMR169C	YIL123W				YPL274W	YKL185W				YJL073W	YDR170C
	YGR193C	YGR084C				YAR007C	YPL023C				YKL174C	YAL033W				YOR102W	YBR165W														YFL014W	YPR149W				YDR166C	YLR020C				YLR372W	YPR159W
	YER158C	YDR143C				YPL023C	YLR005W				YLR287C-A	YNL306W				YDL236W	YBL050W														YLL040C	YDR032C				YKL068W	YER152C				YLR310C	YLR148W
	YHR108W	YIL050W				YKR011C	YBR151W				YLR407W	YPL170W				YMR188C	YER048C														YPR160W	YGL037C				YOR161C	YNR001C				YJR059W	YER143W
	YER134C	YJR111C				YNL056W	YLR015W				YIL076W	YER127W				YHR021C	YLR447C														YML100W	YOR086C				YMR008C	YMR273C				YLR259C	YDR164C
	YOR171C	YOR272W				YBR181C	YJL203W				YMR195W	YLL039C				YGL080W	YPL139C														YHR033W	YJR001W				YBR096W	YIR006C				YGR218W	YLR337C
	YGL197W	YLR099C				YPR101W	YJR074W				YCR028C-A	YLR287C-A				YOR039W	YLR129W														YIL136W	YCR030C				YMR253C	YDR137W				YPL115C	YDR447C
	YML130C	YDR227W				YBR042C	YER102W				YEL044W	YGR235C				YMR161W	YPL239W														YML128C	YGR254W				YGL137W	YMR086W				YDL103C	YDR415C
	YEL015W	YPL085W				YPL004C	YJR142W				YLR104W	YKL021C				YDL228C	YBL055C														YPR184W	YKR013W				YKR027W	YPR021C				YHR174W	YMR238W
	YIR023W	YOL078W				YNR024W	YDR164C				YGR085C	YEL034C-A				YNL255C	YDL137W														YCR061W	YHR087W				YCR093W	YMR205C				YHR135C	YDL066W
	YJR111C	YDL005C				YNL178W	YLR290C				YLR309C	YGR135W				YLR022C	YMR161W														YGR043C	YCR012W				YHR028C	YER009W				YOR160W	YNL267W
	YOR272W	YOR001W				YDR111C	YGR105W				YDL002C	YPL220W				YHR201C	YHR201C														YMR250W	YNL138W				YPL203W	YLR116W				YOL063C	YIL014W
	YPR137W	YJL042W				YKL114C	YGL244W				YER127W	YLR022C				YJR123W	YLR093C														YMR196W	YGR284C				YDR409W	YHR103W				YJR127C	YBR115C
	YGL035C	YHR187W				YMR039C	YMR208W				YOL022C	YDR299W				YER100W	YLR022C														YLR178C	YBR056W				YKL085W	YGR178C				YGL233W	YKL201C
	YNL239W	YDL053C				YCR076C	YPR180W				YNL306W	YDR339C				YLL011W	YOR182C														YGR088W	YOL155C				YNR008W	YLR339C				YML029W	YOR035C
	YCL050C	YNL185C				YLR005W	YNL178W				YKL166C	YLR147C				YLR129W	YJR123W														YIL052C	YKL203C				YJL079C	YHR098C				YOR320C	YNR013C
	YNR046W	YBR030W				YPL087W	YGL020C				YBR262C	YOL149W				YPL239W	YER174C														YDL222C	YNL321W				YFR051C	YFR018C				YBR218C	YMR192W
	YNL311C	YDR425W				YOR383C	YPL087W				YML022W	YJL004C				YKL030W	YGL123W														YDL223C	YHR092C				YKL165C	YKR093W				YMR054W	YLR241W
	YGL213C	YLR448W				YGR074W	YPR172W				YOR283W	YLR309C				YJR105W	YIL064W															YHR137W				YDL224C	YDL189W				YOR326W	YBR041W
	YPR129W	YNL096C				YGL020C	YPR101W				YDR299W	YNR061C				YEL065W	YLR309C															YKL148C				YML078W	YNL325C				YMR027W	YDR097C
	YDR510W	YKR099W				YDR164C	YDR027C				YDR445C	YMR195W				YER174C	YDR494W															YBR241C				YOL119C	YBL037W				YMR079W	YBR275C
	YOR219C	YJL060W				YOR368W	YAL016W				YPL243W	YJR094W-A				YJL014W	YHR021C															YDR074W				YOL151W	YLL012W				YOR153W	YJL039C
	YGR048W	YML072C				YDL015C	YBR042C				YPR108W	YLR344W				YML093W	YMR230W															YIL101C				YNL044W	YCL045C				YLR089C	YER166W
	YOR035C	YIL010W				YJL030W	YLL048C				YGR105W	YMR028W				YGL123W	YGL080W															YLR062C				YDR481C	YDR148C				YJL109C	YDL054C
	YDL036C	YHR169W				YGL244W	YOR368W				YLR022C	YGR005C				YLR292C	YGL110C															YNL115C				YLL015W	YIL136W				YDL124W	YDL052C
	YER064C	YCL037C				YPR180W	YKL114C				YDL166C	YBR262C				YBL050W	YPL143W															YNL045W				YGR172C	YCR048W				YGL040C	YGR026W
	YPL014W	YLR260W				YDR378C	YKR011C				YPR165W	YER131W				YBL055C	YKL163W															YHR094C				YPL231W	YGL077C				YNR017W	YNL135C
	YKL034W	YHL004W				YOR079C	YGR074W				YPL220W	YOR283W				YIL064W	YLR292C															YCL057W				YBR241C	YDR345C				YPL016W	YJL019W
	YDR044W	YNL233W				YMR208W	YPR086W				YLR038C	YMR173W				YOL145C	YOR306C															YPR028W				YPR032W	YJR016C				YMR258C	YLR375W
	YNL061W	YOR340C				YOL102C	YML115C				YKL143W	YPL001W				YML094W	YDR312W															YFR053C				YBR115C	YCR012W				YOL138C	YMR149W
	YLL010C	YLL044W				YPR172W	YDR307W				YLR447C	YKL166C				YHL011C	YOL038W															YIR038C				YLR120C	YDL022W				YHL003C	YOL060C
	YHR192W	YJL208C				YKL160W	YDR276C				YER074W-A	YDR328C				YER048C	YPL010W															YMR173W-A				YJL068C	YGR218W				YCL009C	YDR251W
	YML072C	YOR132W				YOR234C	YBR036C				YOL149W	YKR042W				YPL061W	YLL011W															YIL155C				YOL090W	YGL161C				YKL126W	YMR109W
	YIL119C	YDL201W				YPR086W	YPR165W				YGL020C	YGR105W				YDR312W	YGL091C															YDL022W				YJR059W	YNL330C				YDR238C	YJR077C
	YGR146C	YLR450W				YKR014C	YOR069W				YCR016W	YOR102W				YJL011C	YOR078W															YBR214W				YFL033C	YKL038W				YMR214W	YDL004W
	YGL049C	YBR066C				YOL087C	YOR079C				YMR235C	YGR275W				YPL010W	YGR186W															YBR026C				YPR156C	YMR258C				YPL028W	YIL145C
	YOR001W	YGR146C				YPR165W	YBR181C				YGR103W	YCL055W				YPL139C	YPR163C															YLR044C				YDR376W	YBR187W				YPR069C	YDR519W
	YGR058W	YBL024W				YJR142W	YNR035C				YDR119W-A	YGR214W				YNL175C	YDR346C															YMR105C				YMR162C	YLL001W				YAL008W	YOR370C
	YML114C	YKL155C				YDL099W	YKL160W				YKL018C-A	YOR287C				YPL143W	YER171W															YDR406W				YDL140C	YJL134W				YKL068W	YDR128W
	YOR081C	YOL040C				YNL155W	YPR147C				YGR024C	YDR045C				YGL110C	YGR163W															YOR291W				YNR055C	YJR077C				YKL096W	YBR046C
	YHR099W	YOR101W				YGL200C	YMR212C				YGR235C	YDR119W-A				YDL161W	YEL034C-A															YLR258W				YHL030W	YOR270C				YIL111W	YNR041C
	YDR405W	YBR055C				YPR147C	YOL102C				YGR005C	YDR429C				YOR078W	YBL093C															YOR356W				YML008C	YGR184C				YMR253C	YOR355W
	YMR146C	YJL076W				YNR035C	YOR234C				YKR074W	YFL005W				YMR256C	YMR235C															YDL204W				YER070W	YKR018C				YLR354C	YHR026W
	YPL249C-A	YBR269C				YKR052C	YCR076C				YCL031C	YOR262W				YCR028C-A	YOL010W															YOL052C-A				YOL098C	YJL042W				YJR143C	YGL133W
	YGR150C	YNL061W				YIL027C	YNR032W				YCR082W	YOR276W				YNL002C	YMR188C															YAL005C				YER069W	YLR375W				YHR098C	YLR207W
	YCR033W	YBR007C				YLL048C	YDL099W				YIL016W	YKL018C-A				YMR263W	YGR019W															YFL014W				YKL215C	YMR143W				YLR361C	YMR080C
	YOR233W	YPL159C				YPR081C	YOL087C				YNR061C	YDL002C				YOL010W	YML093W															YMR304W				YEL053C	YHR216W				YGR172C	YLR109W
	YGL038C	YNL131W				YNR032W	YOL075C				YLL039C	YPR086W				YGR163W	YOR332W															YLL040C				YCR088W	YOR370C				YPR154W	YAL002W
	YHR169W	YBR260C				YBL055C	YPL208W				YDR168W	YGL020C				YGR019W	YPL273W															YOR161C				YJL002C	YMR102C				YIL034C	YMR071C
	YBR221C	YPL202C				YPL143W	YJR040W				YFL005W	YLR038C				YGR186W	YER122C															YML100W				YBL007C	YNL141W				YPL183C	YJR065C
	YJL060W	YDR527W				YDR167W	YHR072W				YMR173W	YGL244W				YNL180C	YOL149W															YPR160W				YCL009C	YDL171C				YLR028C	YPL163C
	YLR419W	YJR007W				YAL016W	YKL008C				YKL058W	YHR096C				YBL093C	YML094W															YML128C				YPR081C	YHR186C				YGR281W	YCR048W
	YGR198W	YGL120C				YBR036C	YGR281W				YKL006W	YNL178W				YPL266W	YEL071W															YCR061W				YCL057W	YGL091C				YNL221C	YDR237W
	YER183C	YPL212C				YML115C	YGL110C				YOR276W	YDR168W				YGL091C	YOR362C															YIL136W				YFR030W	YOR169C				YBR196C	YGR218W
	YKL022C	YJL084C				YML055W	YJR096W				YGR275W	YGR262C				YDR346C	YCR028C-A															YPR184W				YOR329C	YNL007C				YGL102C	YLR310C
	YDL005C	YLR244C				YPL234C	YML055W				YOR052C	YOL077W-A				YMR143W	YMR256C															YMR169C				YPR095C	YOR116C				YGR080W	YDR367W
	YAR015W	YPL032C				YOL075C	YDR396W				YIL110W	YOR327C				YDR412W	YNR061C															YHR033W				YNL160W	YOR113W				YNL085W	YHR135C
	YDR143C	YMR002W				YOR069W	YKR052C				YOR262W	YLR325C				YER171W	YKR071C															YMR196W				YGR019W	YBR006W				YLR071C	YMR207C
	YAL032C	YIL044C				YGL110C	YPR062W				YPL001W	YLR333C				YIL016W	YER072W															YMR250W				YGL206C	YLR301W				YKL141W	YDR080W
	YNL233W	YML112W				YDR335W	YOL145C				YOR006C	YKL153W				YOL038W	YMR143W															YIL052C				YBR220C	YGR260W				YLR086W	YLR372W
	YPL118W	YDR239C				YOR067C	YLR333C				YDR167W	YIL016W				YDR168W	YER049W															YGR088W				YGL167C	YDR206W				YNR008W	YOR063W
	YDR296W	YKL062W				YDR064W	YGL224C				YDL121C	YOR096W				YOR306C	YDL147W															YGR043C				YFR053C	YKR066C				YPR029C	YLR259C
	YBL024W	YMR231W				YLR392C	YPL234C				YHR065C	YEL044W				YCR005C	YDL161W															YLR178C				YJR121W	YPR198W				YHR123W	YOR326W
	YMR255W	YFL034C-B				YMR212C	YKR014C				YBR290W	YKR081C				YBL040C	YGL070C															YDL222C				YIR007W	YNL161W				YDR284C	YJL073W
	YNL252C	YGL127C				YLR107W	YDR064W				YDR429C	YHR065C				YKL058W	YGR132C															YDL223C				YNL134C	YPR028W				YJL029C	YAL040C
	YGR056W	YIL079C				YDR075W	YOR067C				YMR022W	YER074W-A				YHR136C	YNL024C-A																			YNR019W	YLR241W				YGR279C	YPL115C
	YOR032C	YBR261C				YDL018C	YBL055C				YKR014C	YKL143W				YOL149W	YNL002C																			YHR072W	YGL008C				YOR168W	YDL124W
	YOL078W	YLR226W				YLR129W	YOR061W				YPR086W	YLR221C				YER122C	YPL053C																			YMR110C	YDL054C				YIL033C	YOR153W
	YAL003W	YNL104C				YOR016C	YNR024W				YJL009W	YML001W				YMR235C	YLR285W																			YLR144C	YIL145C				YBL035C	YNL278W
	YGL120C	YPL011C				YGL224C	YDR378C				YHR096C	YJL009W				YNL024C-A	YHL013C																			YPL134C	YJR138W				YKR018C	YNL100W
	YGL011C	YNL236W				YPR062W	YGR155W				YGR020C	YIL110W				YDL148C	YDR168W																			YHR086W	YLR299W				YDL145C	YOR160W
	YPL085W	YBR202W				YPL208W	YBR111C				YLR325C	YKL002W				YOR332W	YDR412W																			YOR374W	YMR015C				YPR022C	YBR218C
	YLL036C	YBR079C				YPR166C	YLR107W				YGR262C	YML055W				YLR170C	YLR003C																			YGL060W	YBR054W				YDR148C	YDL103C
	YJL042W	YBR238C				YLR361C	YDR335W				YML055W	YCL001W				YKR071C	YDL051W																			YBR053C	YDL015C				YDR192C	YJR059W
	YKR096W	YMR121C				YNL129W	YLR361C				YPR143W	YPR062W				YPL273W	YML067C																			YKR088C	YDR283C				YOR230W	YDR238C
	YDL131W	YDR422C				YJR040W	YPR081C				YER131W	YIL014W				YGR132C	YLR387C																			YGL006W	YLR328W				YOR085W	YIL070C
	YLR215C	YPL137C				YBL001C	YNL155W				YKL075C	YDL121C				YPR163C	YPL001W																			YHR112C	YPL023C				YOR329C	YLR166C
	YLR448W	YOL073C				YDR396W	YBR235W				YEL034C-A	YPR044C				YLR146C	YLR146C																			YJR161C	YBR084W				YPL045W	YMR054W
	YBR202W	YPL177C				YKL008C	YPL218W				YJR094W-A	YGR103W				YNR061C	YJL009W																			YDL185W	YAL017W				YHR155W	YMR027W
	YIL010W	YJR019C				YLR034C	YLR024C				YKL033W-A	YCL031C				YDL147W	YNL142W																			YBR139W	YDR456W				YJL016W	YMR079W
	YBR030W	YKL124W				YOR182C	YML069W				YLR344W	YLR025W				YGR020C	YPL106C																			YKL203C	YDR284C				YMR083W	YMR006C
	YNL121C	YIL041W				YGR155W	YHR063C				YGL244W	YGR020C				YML067C	YER102W																			YOR181W	YKL126W				YGR227W	YOR320C
	YDR425W	YPL026C				YGR281W	YER021W				YOR327C	YJR123W				YER145C	YDR267C																			YER119C	YOL122C				YDR335W	YML029W
	YLR099C	YBR221C				YPL218W	YNL067W				YCL001W	YPL010W				YEL034C-A	YPL206C																			YOR317W	YMR145C				YPR042C	YGL233W
	YIL050W	YOR163W				YJR073C	YGR218W				YBL026W	YKL058W				YJL009W	YER145C																			YJR091C	YHR204W				YGL094C	YJL109C
	YOR191W	YGL043W				YJR096W	YER107C				YBL036C	YKR014C				YGL070C	YML001W																			YBR136W	YGL207W				YDR507C	YPR069C
	YNL096C	YPL259C				YBR235W	YKL094W				YNL147W	YOL139C				YLR003C	YKR094C																			YLL031C	YLR034C				YMR086W	YGL008C
	YLR260W	YER068W				YLR333C	YGL200C				YNL110C	YBR164C				YHL013C	YLR018C																			YNR030W	YMR129W				YMR205C	YJR127C
	YJL208C	YPL115C				YDL204W	YOR016C				YDR086C	YLR441C				YER049W	YIL016W																			YGL073W	YNL241C				YJL041W	YPL028W
	YPL212C	YPR091C				YOR061W	YNL129W				YKL160W	YKR068C				YOR362C	YER099C																			YKR046C	YLR028C				YPR049C	YJR143C
	YDL201W	YNL299W				YLR024C	YGR101W				YBR164C	YKL075C				YLR018C	YGR005C																			YLL048C	YDR046C				YML110C	YNL085W
	YBR066C	YLR180W				YHR072W	YLR372W				YGL231C	YKR074W				YDR086C	YIL110W																			YJL172W	YGR111W				YJR051W	YOL063C
	YNL137C	YDR417C				YEL029C	YOR329C				YHR196W	YKL160W				YEL071W	YKL058W																			YLR087C	YJR045C				YER009W	YGL040C
	YNL185C	YLR172C				YMR074C	YGL087C				YGR214W	YPR098C				YKL163W	YNL180C																			YKL103C	YNL102W				YHR163W	YKL068W
	YNL104C	YOR230W				YHR063C	YIL027C				YLR435W	YHR021C				YLR325C	YLR170C																			YLR024C	YOR153W				YNL190W	YHR098C
	YCL037C	YMR181C				YEL012W	YGR200C				YPR062W	YER133W				YER102W	YPL220W																			YDR380W	YGR271W				YMR076C	YLR028C
	YBR238C	YGL039W				YGR101W	YOL149W				YIL014W	YDL166C				YHR052W	YKL065C																			YOR002W	YOL057W				YGL225W	YGR281W
	YOR340C	YAR002W				YGL017W	YMR074C				YPR044C	YIL127C				YDL051W	YGR020C																			YMR238W	YLR304C				YAR007C	YHL003C
	YPL202C	YLR058C				YGR046W	YGL017W				YHR121W	YGR024C				YPL001W	YJL156C																			YJL095W	YKR065C				YGR184C	YNL221C
	YDL182W	YBR028C				YOL145C	YBL001C				YPL010W	YKL033W-A				YER112W	YMR263W																			YPL223C	YPL015C				YFR051C	YLR089C
	YJL084C	YMR268C				YER107C	YHL030W				YKR042W	YDL007W				YNL142W	YJL143W																			YDR127W	YJL080C				YOR038C	YLR071C
	YDL053C	YNR054C				YBR111C	YMR039C				YOR094W	YHR196W				YGR245C	YDL148C																			YML075C	YER014W				YOR253W	YBR196C
	YMR231W	YDL182W				YKL201C	YMR088C				YKR068C	YMR143W				YKL065C	YOR310C																			YPR127W	YGR141W				YHR165C	YIL111W
	YDR227W	YMR086W				YNL067W	YDL018C				YER126C	YKL156W				YER072W	YIL148W																			YOR143C	YDL145C				YGR258C	YOR168W
	YGR084C	YPR124W				YKL094W	YNL039W				YML001W	YJR024C				YDL050C	YBL040C																			YER011W	YGL225W				YLR270W	YOL138C
	YLL044W	YKL192C				YOR329C	YOR034C				YER133W	YDR086C				YIL148W	YGL030W																			YNL274C	YEL032W				YNL026W	YDL145C
	YBR007C	YMR290C				YJL104W	YEL029C				YGL158W	YGL231C				YNL043C	YDR427W																			YKL197C	YNL336W				YPL082C	YKL126W
	YBR260C	YER013W				YHR039C-A	YDR080W				YMR311C	YMR173W-A				YGR005C	YDR299W																			YCR017C	YNR047W				YMR140W	YGR055W
	YOR132W	YMR081C				YMR088C	YCR032W				YKL196C	YOR094W				YJL104W	YPR165W																			YJR126C	YEL042W				YER178W	YHR174W
	YHR187W	YOR342C				YDR289C	YDR289C				YOR096W	YLR093C				YBL011W	YLR196W																			YKL157W	YIL017C				YML124C	YPL183C
	YLR450W	YPR145W				YJL068C	YOR310C				YKL153W	YBL040C				YLR254C	YKL013C																			YGR281W	YBR170C				YGL027C	YLR354C
	YDR527W	YER057C				YOR310C	YGR046W				YPR098C	YKL196C				YGL030W	YER148W																			YGR227W	YDR080W				YEL024W	YNR017W
	YIL044C	YDL088C				YHR089C	YFR006W				YNL178W	YOR006C				YPL106C	YPL266W																			YCR067C	YBR001C				YIR006C	YMR258C
	YBR261C	YHR215W				YOR167C	YLR129W				YLR333C	YLR421C				YDR447C	YJL104W																			YGR036C	YBR097W				YNL084C	YKR018C
	YPL137C	YLR380W				YDL006W	YDL133W				YBL040C	YCR082W				YLR387C	YGR245C																			YMR054W	YNL280C				YLR034C	YIL034C
	YJL076W	YPR013C				YGL087C	YLL015W				YOR159C	YBR290W				YBR181C	YBL011W																			YDR432W	YPL222W				YCR021C	YPR029C
	YOL040C	YBL032W				YDL133W	YML007W				YOL139C	YGL135W				YDR267C	YGR235C																			YJL196C	YNL048W				YPR198W	YBL035C
	YPL159C	YGR202C				YPL271W	YPL271W				YGL029W	YFR004W				YFR033C	YKL088W																			YDR415C	YCR077C				YDL064W	YCL009C
	YBR079C	YKR001C				YGR218W	YLR220W				YKL156W	YBR181C				YLR147C	YLR441C																			YGL083W	YMR304W				YPR032W	YMR205C
	YNL236W	YOL126C				YDR328C	YJR073C				YIL002W-A	YCR016W				YDR299W	YGL020C																			YNL138W	YBR102C				YBL102W	YOR230W
	YOR101W	YLR116W				YFL005W	YLR034C				YJL011C	YKL144C				YML001W	YEL051W																			YHR026W	YJR066W				YMR129W	YKL141W
	YHL004W	YLR094C				YLR372W	YGR235C				YHR021C	YBR089C-A				YIL110W	YBR006W																			YOL011W	YOR336W				YOL098C	YML021C
	YLR244C	YML091C				YOL149W	YDL006W				YJR024C	YDR167W				YPL053C	YPR016C																			YDR135C	YBR281C				YGR157W	YKL096W
	YJR007W	YKL109W				YGR200C	YOL042W				YLR093C	YOR052C				YKR094C	YGR276C																			YLR178C	YLR337C				YML017W	YMR083W
	YML112W	YOL005C				YER021W	YOR182C				YGR063C	YNL147W				YLR441C	YPL217C																			YDR001C	YPL085W				YDR293C	YDR148C
	YBR055C	YAL012W				YKL063C	YPR166C				YKL040C	YJL123C				YDR427W	YBR089C-A																			YHR096C	YJL127C				YMR259C	YOR085W
	YGL127C	YDL040C				YDR118W	YER014W				YKL144C	YKR094C				YLR285W	YOL144W																			YGR216C	YHR198C				YOR217W	YJL041W
	YFL034C-B	YDL202W				YPR188C	YJL104W				YJR123W	YER159C				YCL031C	YDR086C																			YNL101W	YPL150W				YKL182W	YPR022C
	YKL155C	YGR002C				YOR034C	YKL063C				YMR143W	YFL045C				YOL144W	YLR325C																			YGR138C	YKR070W				YDR505C	YDR335W
	YBR269C	YGR082W				YNL026W	YPL053C				YMR039C	YKL040C				YJL156C	YFR033C																			YAL001C	YML004C				YJR140C	YGR184C
	YPL177C	YOL027C				YOL042W	YOL020W				YLR421C	YHR136C				YPL220W	YBR181C																			YMR173W-A	YJL052W				YMR273C	YLR361C
	YJR010W	YOR297C				YMR207C	YDR118W				YLR441C	YOR159C				YPL206C	YNL070W																			YGL084C	YEL046C				YBR052C	YNR008W
	YMR290C	YPL057C				YDR080W	YLR447C				YMR173W-A	YKR047W				YCL054W	YOR283W																			YJR033C	YKL151C				YAL026C	YJR073C
	YNL131W	YGR049W				YPR187W	YMR092C				YDR278C	YDR363W-A				YCL035C	YKL174C																			YNL200C	YGL092W				YGL060W	YHR123W
	YHR143W	YPR035W				YLR220W	YKL201C				YAL059W	YOR194C				YNL070W	YDR447C																			YOR356W	YBL030C				YIR036C	YGR080W
	YNR054C	YBR105C				YHR181W	YDR075W				YER002W	YGL123W				YKL088W	YDL178W																			YPR138C	YBR286W				YMR075W	YMR253C
	YDR422C	YNR018W				YCR032W	YPR127W				YGR008C	YBL036C				YOL077W-A	YLR254C																			YPL240C	YKL046C				YEL056W	YAL008W
	YLR172C	YBR093C				YOL048C	YPR188C				YDL153C	YOL127W				YLR276C	YCL031C																			YMR136W	YHR099W				YOR093C	YDR284C
	YDR239C	YMR183C				YDR047W	YFL005W				YOR021C	YGR209C				YNL147W	YHR052W																			YBR108W	YNR011C				YDR411C	YAR007C
	YKL124W	YDR156W				YHL030W	YIL090W				YCR087W	YOR261C				YKL067W	YPL243W																			YPR164W	YDR105C				YGL017W	YLR086W
	YIL079C	YOR344C				YML007W	YHR181W				YGR209C	YJL190C				YBR006W	YPR056W																			YKR067W	YNL190W				YNL315C	YHR155W
	YML091C	YDR123C				YML069W	YMR207C				YDR051C	YHR060W				YGR276C	YER055C																			YPL246C	YIL002C				YKL148C	YDR507C
	YLR226W	YGL222C				YDL192W	YGR295C				YBR089C-A	YHR121W				YOR283W	YNL043C																			YDL204W	YGR232W				YOR102W	YMR076C
	YBL032W	YGL209W				YGR235C	YDR167W				YLR200W	YBL028C				YPL217C	YLR276C																			YOL075C	YGL227W				YBR286W	YPL082C
	YOL073C	YHR143W				YGL068W	YKL002W				YKR047W	YLR435W				YPR165W	YJL055W																			YGR201C	YPL125W				YOR336W	YPL016W
	YMR002W	YHR036W				YNL039W	YOR167C				YOR252W	YOR123C				YLR196W	YLR421C																			YHR080C	YLR256W				YNL271C	YNL190W
	YKL192C	YLR063W				YLR447C	YNL253W				YER112W	YHL034W-A				YKL013C	YCR005C																			YPL154C	YOR034C				YKL010C	YFR051C
	YMR121C	YER147C-A				YKR017C	YOL061W				YBR242W	YOR257W				YBR085C-A	YBR066C																			YKL182W	YHR029C				YEL013W	YMR214W
	YPL115C	YLR052W				YMR267W	YDL192W				YOR123C	YIL052C				YGR147C	YPR108W																			YJL171C	YHR054C				YNL291C	YPL045W
	YMR081C	YDR502C				YPR127W	YDR047W				YDR373W	YDR373W				YJL143W	YGR147C																			YNR016C	YOL003C				YDR096W	YJR051W
	YDR417C	YPL068C				YFR006W	YLR020C				YOR194C	YBR154C				YOR285W	YDR311W																			YGR205W	YDR122W				YCL045C	YGL094C
	YPR013C	YOR141C				YJL140W	YNL323W				YKL122C	YJL011C				YGR235C	YCL054W																			YNL321W	YEL047C				YPL048W	YPR042C
	YOR163W	YDR278C				YOR036W	YDR023W				YBR154C	YDR139C				YEL051W	YCL035C																			YDL217C	YNR017W				YGL207W	YPR154W
	YKL062W	YPL183W-A				YBR006W	YDR039C				YFR001W	YMR230W				YBR089C-A	YML024W																			YDR047W	YCR021C				YNL055C	YHR165C
	YNL299W	YMR024W				YDL021W	YKL041W				YGL135W	YML063W				YML108W	YJR094W-A																			YGR157W	YIR038C				YNL264C	YML110C
	YPL011C	YNR049C				YPL053C	YKR017C				YJL190C	YMR311C				YOR310C	YGR028W																			YBR026C	YKR049C				YNR001C	YJL029C
	YJR019C	YOL141W				YOL096C	YHR089C				YMR230W	YNL153C				YBR066C	YLR407W																			YMR272C	YHR113W				YMR178W	YMR086W
	YGL039W	YDL049C				YKL002W	YGR071C				YFL045C	YDR051C				YER099C	YLR197W																			YGR055W	YNL026W				YAL023C	YIL033C
	YGL209W	YGR079W				YER030W	YGR132C				YJL123C	YCL058C				YKR068C	YGL147C																			YDL195W	YMR047C				YLR144C	YGL027C
	YMR181C	YLR357W				YDR039C	YFR036W-A				YOR257W	YGR118W				YGR085C	YKL156W																			YCR032W	YKL051W				YDL140C	YDR192C
	YDR278C	YBR039W				YER081W	YJL140W				YBR181C	YOR167C				YGL020C	YLR147C																			YNL045W	YDR457W				YLR386W	YGR227W
	YER068W	YFR055W				YOR278W	YGL068W				YGR280C	YGR063C				YGL031C	YGL031C																			YJL101C	YBR169C				YDL157C	YMR129W
	YLR116W	YBR146W				YKR076W	YOL096C				YKR094C	YHR010W				YLR421C	YJL004C																			YLL058W	YNL267W				YGL187C	YML124C
	YPR091C	YDR246W				YLL050C	YEL012W				YIL063C	YKL041W				YKL156W	YPL142C																			YLL028W	YJL109C				YGR036C	YPL100W
	YAR002W	YER091C				YHR029C	YJR123W				YIL019W	YIL063C				YER148W	YML022W																			YFR019W	YDL135C				YER101C	YOR329C
	YIL041W	YLR286C				YNL253W	YLR075W				YDR002W	YIL019W				YGL147C	YKR047W																			YMR208W	YJL060W				YIL048W	YPR049C
	YOR230W	YOL136C				YJR123W	YCL011C				YIL008W	YDL075W				YPR016C	YDL050C																			YLR001C	YDL113C				YMR102C	YIR006C
	YLR058C	YOR047C				YJL070C	YPL195W				YKL041W	YNL110C				YML024W	YKL117W																			YAL060W	YGR155W				YPL127C	YOL098C
	YGL043W	YOR221C				YJL155C	YBR046C				YDR327W	YGL147C				YLR038C	YLR038C																			YIL108W	YML017W				YKL004W	YJL016W
	YKR001C	YGL064C				YLL015W	YMR223W				YKL009W	YDR002W				YOR261C	YKR068C																			YML128C	YNL242W				YER053C	YHR163W
	YPL259C	YOL019W				YGR132C	YHR029C				YHR010W	YDR327W				YPR056W	YGL044C																			YBR140C	YBR003W				YOL122C	YLR270W
	YMR086W	YMR189W				YLR020C	YDR415C				YOL127W	YJL104W				YPL142C	YNL147W																			YLL026W	YCL024W				YMR247C	YOR038C
	YPR124W	YBR296C				YER014W	YLL039C				YLR078C	YPL117C				YKL174C	YGR074W																			YDL164C	YLR345W				YHR042W	YGR279C
	YOL126C	YDR277C				YDR306C	YJL155C				YIL052C	YDR278C				YLR197W	YIL103W																			YML056C	YKL057C				YJR033C	YAL026C
	YLR094C	YKL138C				YOR210W	YKL057C				YHR072W-A	YBR242W				YGR028W	YER131W																			YDR032C	YER033C				YHR113W	YGR172C
	YDR502C	YLR356W				YKL041W	YGL121C				YPR051W	YLR078C				YDL212W	YDL212W																			YDL215C	YDR141C				YIL155C	YGR157W
	YBR028C	YGL058W				YLL039C	YHR005C-A				YGL123W	YPR051W				YDL178W	YFL028C																			YOL020W	YMR247C				YDR359C	YML017W
	YOR297C	YKL185W				YIL101C	YBR006W				YNL043C	YOR021C				YER055C	YGR085C																			YCR061W	YDR276C				YLR301W	YNL084C
	YBR296C	YOL140W				YMR157C	YLR250W				YGR118W	YLR154W-F				YOL124C	YHR136C																			YCL040W	YPR155C				YDR047W	YKL182W
	YLR380W	YDR116C				YBR046C	YJR025C				YJL104W	YCR087W				YNL306W	YOR261C																			YNR067C	YPR172W				YBR149W	YMR140W
	YOR344C	YPR043W				YOL020W	YLL050C				YGR271C-A	YBL026W				YPL243W	YOL022C																			YDL093W	YPL270W				YDR432W	YER178W
	YPR145W	YER124C				YHR005C-A	YJL070C				YDL099W	YGR106C				YKR074W	YOR276W																			YAL008W	YGR038W				YML008C	YGR258C
	YHR215W	YJL133C-A				YOL083W	YOL045W				YOR167C	YOR252W				YGL044C	YOL077C																			YGL226C-A	YHR042W				YPL125W	YBR286W
	YOL141W	YLR363W-A				YFR036W-A	YGL083W				YER146W	YKR057W				YDR311W	YLR065C																			YHR039C	YGL173C				YLR256W	YOR253W
	YBR105C	YPR125W				YJL048C	YMR228W				YOR089C	YHR063W-A				YKL117W	YER112W																			YGR284C	YHR046C				YDR206W	YDR293C
	YMR268C	YBR072W				YMR223W	YFL028C				YLR043C	YIL002W-A				YDL092W	YDR339C																			YDR074W	YGR183C				YJR025C	YOR217W
	YLR286C	YMR120C				YMR092C	YOR307C				YPL117C	YLR200W				YDR152W	YDL092W																			YEL053W-A	YPR115W				YPR139C	YPR032W
	YER057C	YNL066W				YIL090W	YDR168W				YKL082C	YLR043C				YDR339C	YNL306W																			YBR235W	YNL297C				YNL088W	YMR259C
	YDL088C	YGL028C				YJL143W	YGR267C				YPL225W	YER146W				YLR065C	YER074W-A																			YGR043C	YLR422W				YLL028W	YKL010C
	YER013W	YNR067C				YOL061W	YHR045W				YPR187W	YER126C				YJR094W-A	YBR085C-A																			YLL040C	YJL141C				YLR430W	YOR336W
	YAL012W	YJL078C				YFL028C	YBR004C				YHR063W-A	YPR143W				YPR108W	YKR057W																			YBR126C	YDR093W				YPL023C	YGL207W
	YDR123C	YJL153C				YDR415C	YGR186W				YOR210W	YDL099W				YOL077C	YDR152W																			YNL115C	YEL029C				YMR220W	YGL225W
	YOL005C	YGR160W				YGL121C	YGL185C				YGR106C	YER112W				YER074W-A	YJL123C																			YJR073C	YGR177C				YPR172W	YER009W
	YKL109W	YHL016C				YDR168W	YLR285W				YOR215C	YDR471W				YHR010W	YDR465C																			YOL084W	YDL019C				YBL104C	YPL048W
	YPR043W	YEL053W-A				YJL057C	YGL012W				YBL001C	YMR039C				YIL103W	YML108W																			YPL036W	YPL087W				YGR240C	YCL045C
	YER091C	YDR491C				YGL185C	YJL143W				YML063W	YDR399W				YHR138C	YML063W																			YPL058C	YLR454W				YMR078C	YNL271C
	YGR079W	YKL164C				YHR140W	YIL003W				YKR057W	YLR051C				YER131W	YDL067C																			YJR001W	YMR013C				YDR279W	YDL064W
	YOR342C	YKR097W				YNL162W	YNL026W				YLR154W-F	YAL059W				YJL055W	YER037W																			YER053C	YNL219C				YKL008C	YJR140C
	YMR183C	YNL117W				YOR054C	YBR302C				YOR182C	YGL031C				YDR450W	YER123W																			YJR137C	YDR166C				YNL250W	YEL013W
	YDR156W	YNL327W				YOR215C	YML132W				YNR024W	YOR089C				YKR047W	YHR012W																			YML070W	YGR240C				YGR244C	YDL140C
	YGR049W	YNL014W				YNL323W	YFL009W				YGL147C	YOR210W				YFL028C	YKL067W																			YJL005W	YOR155C				YLR459W	YBR052C
	YGR002C	YAL004W				YCL024W	YNL162W				YDL075W	YNR024W				YGR105W	YGR253C																			YJL091C	YDR216W				YLL015W	YNL055C
	YGR082W					YIL003W	YLR319C				YHR052W-A	YBL001C				YGR074W	YKR074W																			YHR092C	YPR128C				YMR297W	YLR034C
	YDL202W					YDR545W	YNL325C				YHR054W-A	YOR215C				YOR276W	YDL075W																			YOL129W	YMR006C				YKL038W	YNL026W
	YFR055W					YLR467W	YDR306C				YPL237W	YOR312C				YKL033W-A	YOR167C																			YPL184C	YDR430C				YGL022W	YEL024W
	YER147C-A					YOR396W	YIL108W				YMR260C	YNL043C				YKR057W	YHR010W																			YAL005C	YHL017W				YBR229C	YAL023C
	YDL049C					YLR075W	YOR175C				YDR399W	YOR182C				YML022W	YGR105W																			YOR109W	YDR505C				YCR011C	YKL148C
	YDL040C					YOL045W	YAR027W				YLR175W	YKL009W				YAL033W	YAL033W																			YHR137W	YJR040W				YKL134C	YOR093C
	YGR202C					YBR302C	YHR081W				YDR471W	YGL103W				YDL075W	YER012W																			YBR214W	YBR243C				YGL092W	YDR505C
	YBR093C					YML132W	YHR039C-A				YDR372C	YLR406C				YDL067C	YDR450W																			YMR090W	YBR159W				YPL231W	YGL102C
	YNR018W					YBL035C	YOR123C				YDL136W	YGL158W				YER037W	YDR471W																			YOR173W	YBR046C				YMR199W	YNR001C
	YPL068C					YGL083W	YOR278W				YOR285W	YKL122C				YOL022C	YPR133C																			YBL015W	YGL195W				YBR281C	YMR247C
	YPL057C					YKL057C	YOR075W				YAL025C	YER002W				YML063W	YOR285W																			YBR056W	YAR042W				YDR111C	YBL102W
	YPR035W					YGR071C	YJL048C				YJL148W	YPL237W				YDR471W	YDR429C																			YGR248W	YLR352W				YJR048W	YMR273C
	YOL027C					YPR051W	YMR157C				YGL103W	YDR372C				YHR012W	YEL020C																			YMR105C	YOR136W				YBR111C	YIL048W
	YLR063W					YJR025C	YOR215C				YGL031C	YPL090C				YOR167C	YPL235W																			YGR199W	YGL040C				YNL320W	YEL056W
	YGL222C					YDR023W	YDR328C				YOR312C	YIL148W				YDR465C	YOL124C																			YGR256W	YMR176W				YNR031C	YPR198W
	YJL153C					YGR267C	YNL326C				YDL191W	YDL191W				YJL123C	YOL002C																			YDR406W	YJL193W				YLR342W	YDR411C
	YOL019W					YPR184W	YOR360C				YLR406C	YML024W				YCL001W	YHR065C																			YKR076W	YER044C				YMR012W	YMR075W
	YNR049C					YBR242W	YOR054C				YPL090C	YDL153C				YDL121C	YHR089C																			YJR127C	YKL068W				YBL037W	YCR021C
	YPL183W-A					YJR057W	YIL101C				YJL189W	YGR008C				YPL211W	YCL001W																			YLR258W	YBR225W				YGR177C	YNL264C
	YHR036W					YGR295C	YBR054W				YNL244C	YNL162W				YMR239C	YDL121C																			YPL006W	YJR148W				YMR170C	YLR386W
	YGL064C					YFR047C	YOL139C				YER019C-A	YHR052W-A				YCR016W	YKL033W-A																			YMR169C	YLR378C				YFL033C	YHR042W
	YLR052W					YPL195W	YIL076W				YDR177W	YHR054W-A				YPR133C	YGR262C																			YKL129C	YAL002W				YHL030W	YLR430W
	YMR024W					YBR175W	YJR051W				YJL140W	YGR280C				YGR253C	YLR257W																			YGR088W	YHR028C				YBR216C	YLR144C
	YOR141C					YMR228W	YIL148W				YML024W	YHR072W-A				YHR065C	YOR061W																			YPR043W	YLR259C				YIL090W	YPL125W
	YLR357W					YOR307C	YKL007W				YIL148W	YER019C-A				YDR075W	YGR275W																			YHR016C	YLL015W				YHR103W	YNL315C
	YMR120C					YGL012W	YJL129C				YML026C	YMR294W-A				YER012W	YMR239C																			YDL222C	YFR051C				YHR186C	YNL088W
	YDR246W					YOR075W	YJL136C				YNL162W	YPL146C				YKL021C	YDR075W																			YDL223C	YKL165C				YBL077W	YLR256W
	YLR363W-A					YDR410C	YOL127W				YMR294W-A	YPR187W				YEL020C	YDR280W																			YMR196W	YPL188W				YOR245C	YML008C
	YBR146W					YOR123C	YPL125W				YIL138C	YDR447C				YHR089C	YMR044W																			YML100W	YDR531W				YJL171C	YMR178W
	YOL136C					YCL011C	YBR175W				YPR102C	YDR177W				YER123W	YER094C																			YPR160W	YDR111C				YDR539W	YIR036C
	YBR039W					YLR250W	YKL046C				YDL065C	YPL225W				YGR275W	YPL237W																			YOR291W	YAL023C				YGR271W	YGL017W
	YOR221C					YBR054W	YDL021W				YDR447C	YLR175W				YJL190C	YOL077W-A																			YMR250W	YIL039W				YIL109C	YGL060W
	YDR277C					YBR053C	YOR094W				YGL102C	YOR285W				YDR429C	YKR085C																			YGL156W	YMR261C				YPL084W	YNL291C
	YLR356W					YAR027W	YOL083W				YNL215W	YPR102C				YLR449W	YKL114C																			YPR184W	YPL048W				YMR099C	YGR240C
	YKL138C					YBR004C	YGL159W				YGR034W	YAL025C				YDR280W	YOR327C																				YJL158C				YER155C	YOL122C
	YGL058W					YGR186W	YJR094W-A				YPR188C	YJL140W				YCL059C	YLR449W																				YKL210W				YML078W	YGL187C
	YOR047C					YOL139C	YJR057W				YOL109W	YGR034W				YGR262C	YPL211W																				YJR131W				YMR237W	YBR149W
	YJL133C-A					YMR311C	YNL011C				YFR036W-A	YMR260C				YHL015W	YER127W																				YCR093W				YPR149W	YDR206W
	YMR189W					YDL191W	YJL099W				YDR322C-A	YDL136W				YLR257W	YKL166C																				YKL085W				YIL101C	YHR113W
	YHL016C					YIL148W	YFR047C				YER117W	YKL172W				YPL235W	YGR135W																				YKR027W				YJL196C	YLR301W
	YKL185W					YNL325C	YOR021C				YBR058C-A	YML026C				YDR056C	YDL002C																				YGL137W				YJL101C	YMR102C
	YDR116C					YJL129C	YBL035C				YBL077W	YGL030W				YKR085C	YGR106C																				YDR481C				YHR086W	YPL127C
	YNL066W					YDR051C	YER148W				YLR068W	YNL079C				YGR063C	YDR056C																				YNR008W				YCR017C	YGL022W
	YNL014W					YOL119C	YMR267W				YGL030W	YER117W				YPL237W	YKL021C																				YPR156C				YEL038W	YDR096W
	YJL078C					YJL189W	YPR051W				YDR500C	YFR036W-A				YDL002C	YGL244W																				YFL033C				YGR032W	YDR047W
	YNL117W					YFL046W	YCR009C				YOR293W	YKL082C				YMR014W	YJL190C																				YOL098C				YMR015C	YLL015W
	YGR160W					YKL196C	YDR051C				YPL142C	YNL215W				YBR242W	YBR242W																				YGL026C				YGL160W	YMR012W
	YPR125W					YGL159W	YJL193W				YNL150W	YPR188C				YPR102C	YHR063W-A																				YOL090W				YLR212C	YDL157C
	YDR491C					YOR094W	YCR082W				YHR081W	YPL142C				YNL157W	YCL059C																				YPL274W				YBR187W	YDR359C
	YAL004W					YJL136C	YPR187W				YGR169C-A	YDR500C				YOR061W	YKL160W																				YBL007C				YMR143W	YGL092W
						YOL127W	YDR452W				YML062C	YGL102C				YGR135W	YNL157W																				YMR162C				YIL123W	YLR342W
						YHR072W-A	YGR008C				YIL111W	YIL008W				YGR271C-A	YGR063C																				YPR032W				YDR129C	YKL008C
						YNL194C	YHR201C				YLR062C	YDL065C				YGR286C	YPR102C																				YLR342W				YNL312W	YMR297W
						YOR103C	YFL046W				YKL056C	YIL138C				YMR044W	YCR016W																				YKL215C				YKR046C	YMR220W
						YNL011C	YKL196C				YLR367W	YIL111W				YDL191W	YHL015W																				YBR096W				YJL154C	YBL104C
						YLR285W	YMR013C				YHL015W	YLR367W				YOR021C	YDL191W																				YJL016W				YDR291W	YDR432W
						YJR051W	YNL010W				YOR169C	YOL109W				YKL166C	YDR119W-A																				YPR191W				YMR278W	YCR011C
						YNL326C	YLR421C				YEL003W	YFR001W				YKL099C	YOR287C																				YGR254W				YDR283C	YGR244C
						YLR319C	YJL057C				YDL050C	YNL244C				YKL114C	YER019C-A																				YBR115C				YBL064C	YJR033C
						YKL119C	YLR130C				YHR138C	YML062C				YGR106C	YLR009W																				YMR253C				YDL185W	YHR204W
						YDR139C	YKR026C				YLR262C-A	YHL015W				YKL160W	YOL139C																				YEL053C				YOR016C	YIL109C
						YJR008W	YKL045W				YPR132W	YOR293W				YNL110C	YGR187C																				YHL030W				YDR105C	YBR130C
						YFL009W	YDL191W				YER030W	YBR162W-A				YER094C	YIL111W																				YCR088W				YJR091C	YGR271W
						YKL046C	YHR046C				YPR087W	YJL148W				YOR327C	YHR170W																				YNR055C				YOR285W	YLL028W
						YHR045W	YBR242W				YLR154W-C	YBL077W				YLR298C	YML007W																				YJL070C				YIL039W	YJR025C
						YIL124W	YOR036W				YOR369C	YNL150W				YLR221C	YGR286C																				YMR008C				YBR059C	YBR229C
						YIL040W	YOL048C				YOR234C	YKL056C				YER127W	YOR021C																				YER069W				YML085C	YNR031C
						YMR071C	YCL033C				YFR032C-A	YGR271C-A				YHR072W-A	YLL008W																				YMR071C				YGL196W	YER155C
						YOR175C	YLR093C				YHR039C-A	YPR132W				YHR170W	YLR388W																				YDR409W				YDR166C	YKL004W
						YIL076W	YHR140W				YLR076C	YJL189W				YOR287C	YHR138C																				YJL002C				YJL207C	YKL092C
						YIL108W	YOR103C				YLR388W	YLR062C				YBR290W	YLR154W-B																				YCL057W				YDR529C	YHR186C
						YOR360C	YDR305C				YHR141C	YDR322C-A				YLR388W	YDL166C																				YDL224C				YER113C	YLR459W
						YJR094W-A	YDR177W				YJL188C	YOR234C				YDR119W-A	YDL007W																				YFR030W				YGL137W	YHL030W
						YHR080C	YKL006W				YLR154W-E	YOR169C				YLR009W	YGR034W																				YDL237W				YGL093W	YPL231W
						YDL212W	YPL139C				YOR277C	YOR369C				YGR187C	YHR072W-A																				YDR376W				YOR118W	YHR103W
						YDR305C	YDR410C				YLR167W	YHR081W				YIL111W	YPR086W																				YML078W				YOR142W	YDR111C
						YMR013C	YNL215W				YMR269W	YGR169C-A				YHR063W-A	YLR025W																				YGL167C				YAL029C	YBR111C
						YCL033C	YNL336W				YNL017C	YPR087W				YDR167W	YLR298C																				YNR019W				YNL257C	YBR281C
						YKL006W	YGR019W				YOR309C	YBR058C-A				YEL003W	YOR312C																				YJR059W				YLL048C	YPL023C
						YDR058C	YJR013W				YKL083W	YDL050C				YLR154W-B	YBR262C																				YPL203W				YDL029W	YIL090W
						YLR093C	YHR039C					YLR076C				YLL008W	YBR290W																				YHR072W				YDR137W	YPL084W
						YJL099W	YOR357C					YGL029W				YGL244W	YLL039C																				YML008C				YPL085W	YER101C
						YGR063C	YCL024W					YFR032C-A				YGL220W	YGL220W																				YPR095C				YJL129C	YMR237W
						YHR196W	YMR119W					YEL003W				YDL166C	YLR221C																				YHR079C				YHR139C	YFL033C
						YLR421C	YDR058C					YLR388W				YBL028C	YMR014W																				YOL119C				YDL015C	YDR129C
						YKL007W	YOR210W					YLR262C-A				YAL059W	YHR088W																				YCL009C				YPR055W	YOR102W
						YBR280C	YOR245C					YHR039C-A				YDR278C	YDR167W																				YPR081C				YML103C	YGR036C
						YMR119W	YJL123C					YLR068W				YHR088W	YDR278C																				YPL231W				YLR044C	YDL185W
						YDR177W	YBR022W					YHR141C				YDR328C	YDR328C																				YMR170C				YDR443C	YJL196C
						YGR019W	YCR017C					YLR154W-C				YGR103W	YLR076C																				YDL140C				YGR014W	YDR279W
						YBR022W	YOR096W					YHR138C				YPL043W	YGL103W																				YGR172C				YDL019C	YBL037W
						YPR118W	YKR057W					YER030W				YGR034W	YKR014C																				YGR019W				YBR243C	YNL250W
						YER148W	YMR173W					YLR167W				YOL139C	YKL040C																				YGL206C				YKL210W	YCR017C
						YGL044C	YMR311C					YLR154W-E				YER019C-A	YBR164C																				YLR144C				YDL190C	YBR216C
						YNL312W	YBR053C					YJL188C				YLR062C	YIL019W																				YLR134W				YLR183C	YER053C
						YOR386W	YMR071C					YOR277C				YIL127C	YGR103W																				YOR161C				YPL240C	YKL038W
						YHR201C	YML022W					YNL017C				YLR076C	YMR028W																				YLL031C				YJL158C	YMR099C
						YKR057W	YOL119C					YOR309C				YBR262C	YLR406C																				YKL134C				YHL047C	YPR172W
						YJL193W	YNR061C					YMR269W				YOR252W	YKL196C																				YOR329C				YJL080C	YMR278W
						YOR245C	YGL044C					YKL083W				YML007W	YLR367W																				YIR007W				YOL020W	YMR015C
						YKL045W	YCL001W					YLR198C				YDR139C	YML074C																				YBR053C				YPR118W	YPR149W
						YBR154C	YHL017W									YIL019W	YOL054W																				YFR053C				YLR378C	YGL137W
						YDR452W	YKL119C									YGL103W	YFL005W																				YDR096W				YNR016C	YIL155C
						YHR046C	YBR280C									YKR014C	YPL043W																				YOR317W				YLR088W	YDR283C
						YLR130C	YDR372C									YLR367W	YKL099C																				YLR120C				YDL141W	YMR199W
						YPL125W	YOR063W									YLR025W	YOR252W																				YNL160W				YIL125W	YML078W
						YDR372C	YBR256C									YKL040C	YOR194C																				YBR208C				YHL017W	YPR139C
						YML022W	YIL002C									YPL225W	YEL003W																				YMR110C				YLR001C	YJL154C
						YDL136W	YBR154C									YOR312C	YNL110C																				YKR088C				YPL184C	YKR046C
						YHR138C	YDR545W									YKL196C	YOR123C																				YJR121W				YGR270W	YJL207C
						YCR017C	YLR467W									YML074C	YAL059W																				YGL073W				YBR159W	YDR539W
						YHR039C	YOR396W									YMR195W	YJL140W																				YLR087C				YPL150W	YMR143W
						YOR293W	YDL067C									YNL308C	YHR196W																				YKL203C				YDL125C	YGR177C
						YDL219W	YDL125C									YKR081C	YMR195W																				YJL172W				YGR178C	YBL077W
						YOR096W	YIL124W									YLR406C	YPR132W																				YGL060W				YNL241C	YLL048C
						YHR010W	YDL212W									YLR435W	YBR154C																				YBR136W				YHR046C	YIL039W
						YOR357C	YPL197C									YBR058C-A	YCL055W																				YLL048C				YBR108W	YKL134C
						YDL050C	YPL090C									YPR086W	YOR210W																				YHR112C				YKL035W	YML103C
						YNL010W	YIL040W									YPR132W	YNL153C																				YER113C				YFL007W	YNL312W
						YNL109W	YHR196W									YPR142C	YGR118W																				YNL134C				YJL134W	YPL085W
						YLR154W-C	YPR118W									YDL007W	YLR062C																				YBR220C				YDL224C	YAL029C
						YDL067C	YDR005C									YBR164C	YKR081C																				YBR139W				YBR220C	YML085C
						YJR087W	YAR003W									YNL153C	YHR141C																				YNR030W				YER119C	YMR078C
						YPL090C	YHR080C									YOL109W	YBR268W																				YJL068C				YML072C	YOR245C
						YPL139C	YKL079W									YOR293W	YDR373W																				YNL044W				YOR074C	YDL015C
						YNL215W	YKL053C-A									YFL005W	YLR435W																				YGL006W				YMR272C	YMR170C
						YLR175W	YGL227W									YCR087W	YNL162W																				YMR119W				YMR261C	YDR105C
						YCL001W	YDL219W									YJL189W	YKL143W																				YKR046C				YNL134C	YDR166C
						YKL053C-A	YER030W									YGR118W	YER117W																				YJR126C				YOR124C	YER113C
						YDR366C	YHR010W									YJL140W	YOR234C																				YHR086W				YDR380W	YDR291W
						YIL138C	YOR291W									YHR141C	YDR087C																				YML075C				YDL035C	YLR212C
						YOR291W	YDL136W									YLL039C	YKL056C																				YDL185W				YOR155C	YOR142W
						YBL036C	YNL312W									YOR123C	YER146W																				YKL157W				YJL115W	YOR016C
						YNL336W	YNL100W									YOR194C	YDR399W																				YGR281W				YBR086C	YBR059C
						YBR256C	YNL048W									YER117W	YOR293W																				YNL262W				YJL062W	YKL210W
						YKL079W	YPL184C									YDR087C	YER029C																				YMR054W				YPL153C	YJL101C
						YGL227W	YPR176C									YKL143W	YDR327W																				YCR017C				YIL129C	YOR285W
						YKR026C	YIL020C									YBR268W	YER133W																				YNL138W				YDR307W	YBR187W
						YJR013W	YJR008W									YHR196W	YIL127C																				YJL196C				YBL017C	YDL029W
						YPR134W	YOR332W									YKL056C	YPL225W																				YKL103C				YDR276C	YJL080C
						YMR173W	YJR001W									YBL077W	YNL308C																				YHR139C				YLR389C	YJR091C
						YJR001W	YJR024C									YMR260C	YCR087W																				YDR380W				YHR072W	YEL038W
						YAR003W	YOR039W									YDR399W	YBL077W																				YDR135C				YCR030C	YJL129C
						YLR167W	YMR110C									YOR210W	YGR271C-A																				YLR024C				YDL171C	YJR048W
						YBR104W	YML067C									YBR154C	YOR006C																				YOR002W				YOR347C	YHR086W
						YIL002C	YDR515W									YDR373W	YML026C																				YOR181W				YNL139C	YDL190C
						YPL197C	YJR087W									YPR143W	YDR500C																				YBR241C				YDR261C	YGR014W
						YOR063W	YDL027C									YDR322C-A	YFR004W																				YML059C				YIL108W	YPR055W
						YDL027C	YJL156C									YNL079C	YGL158W																				YER070W				YBR088C	YGL196W
						YNR061C	YKL067W									YOR052C	YMR260C																				YJR091C				YLR240W	YPL240C
						YDL125C	YCR028C-A									YNL162W	YOL109W																				YLR189C				YOL081W	YGR178C
						YKL067W	YFR004W									YOL054W	YDR372C																				YOL151W				YGL083W	YIL123W
						YNL100W	YJL079C									YOR234C	YDR002W																				YAL001C				YDR222W	YLR378C
						YPR160W	YKR068C									YKL122C	YNL079C																				YOR356W				YDR400W	YOL020W
						YCR028C-A	YGR248W									YCL055W	YDR139C																				YJL095W				YDR407C	YNL320W
						YMR196W	YGR141W									YGR008C	YOR159C																				YOR374W				YMR092C	YBR243C
						YLR149C	YDR468C									YML026C	YKL009W																				YMR238W				YJL020C	YIL125W
						YGR037C	YBL036C									YKL009W	YOR052C																				YDR127W				YKR013W	YLR044C
						YKR068C	YBR062C									YER029C	YBL028C																				YNL101W				YBR139W	YGR032W
						YBR062C	YDL050C									YPR187W	YPL117C																				YDR415C				YDR368W	YNR016C
						YDR005C	YLR189C									YOR006C	YML098W																				YGR227W				YNL300W	YLR088W
						YMR260C	YGR037C									YDR327W	YPL090C																				YCR067C				YKL100C	YKL035W
						YMR250W	YGL207W									YER133W	YOR369C																				YER119C				YKL034W	YFL007W
						YFR004W	YMR196W									YPL146C	YPR187W																				YOR143C				YKR076W	YDR529C
						YJL123C	YLR301W									YER146W	YBL001C																				YOL011W				YKL057C	YML072C
						YHL017W	YDR100W									YIL008W	YDR322C-A																				YPL240C				YPL249C	YHL017W
						YLR301W	YOR293W									YHR052W-A	YPL170W																				YPR164W				YDL156W	YBL064C
						YJR024C	YIL138C									YHR054W-A	YBR058C-A																				YDR001C				YNL102W	YOR118W
						YGR248W	YER133W									YOR159C	YBL036C																				YGL084C				YPL256C	YDL019C
						YDR468C	YOR386W									YML098W	YKL122C																				YGR157W				YOR065W	YGR270W
						YLR189C	YOR173W									YDR002W	YHR052W-A																				YGR216C				YCL052C	YDL141W
						YIL020C	YPR069C									YHR126C	YHR054W-A																				YGL083W				YKL045W	YBR159W
						YML067C	YJR088C									YDR372C	YLR004C																				YPR138C				YBR166C	YDL125C
						YNL048W	YLR154W-C									YBL001C	YLR438C-A																				YHR026W				YKR088C	YGL160W
						YDR515W	YGR256W									YOR369C	YDR051C																				YJR033C				YNL280C	YPR118W
						YMR110C	YPL096W									YFR004W	YJL189W																				YGR138C				YDR093W	YGL093W
						YPL184C	YGL123W									YDR500C	YOR262W																				YKL197C				YGR170W	YDR137W
						YOR277C	YOL062C									YFR032C-A	YHR039C-A																				YPL134C				YPL274W	YMR272C
						YDR284C	YOR143C									YLR051C	YPR143W																				YOL075C				YDR376W	YBL017C
						YOR173W	YPR113W									YCL058C	YNL150W																				YPR127W				YJR117W	YJL171C
						YHR016C	YMR130W									YBL036C	YFR032C-A																				YPL223C				YGR038W	YNL257C
						YKR074W	YNL109W									YNL150W	YDR177W																				YDR443C				YOL151W	YPL184C
						YDR302W	YHR072W-A									YPL090C	YMR311C																				YCR032W				YKL101W	YBR086C
						YER016W	YJL101C									YLR438C-A	YCL058C																				YJR161C				YPR155C	YLR001C
						YCR020C-A	YGR063C									YMR311C	YDR045C																				YJL079C				YEL047C	YJL158C
						YER133W	YDR284C									YDR051C	YLR167W																				YKL182W				YLR063W	YDR204W
						YGL104C	YDR139C									YPL170W	YGR280C																				YGR036C				YGR209C	YLR389C
						YOR332W	YDR302W									YPL117C	YGR008C																				YMR272C				YKR054C	YOR124C
						YKL151C	YHR043C									YLR167W	YOR277C																				YDR047W				YOR034C	YDL171C
						YGR256W	YDL236W									YOR277C	YMR039C																				YMR136W				YIL047C	YHR072W
						YJR088C	YLR149C									YLR004C	YMR294W-A																				YKR067W				YJR138W	YDL035C
						YGL158W	YDR400W									YFR001W	YOR089C																				YNR016C				YGL157W	YDR443C
						YLR154W-B	YKR074W									YLR262C-A	YLR051C																				YNL274C				YKR065C	YNL139C
						YDL157C	YER016W									YER126C	YIL008W																				YDL195W				YPR128C	YDL224C
						YPR176C	YKR070W									YDR177W	YPR142C																				YDR432W				YKL085W	YOL081W
						YOL084W	YER012W									YDR045C	YER126C																				YPL154C				YOL007C	YIL129C
						YCL067C	YDR272W									YMR039C	YER159C																				YGR055W				YOL057W	YDR380W
						YCR039C	YLR154W-B									YOR262W	YPR062W																				YDL204W				YDR100W	YPL150W
						YNL200C	YJL189W									YER002W	YLR262C-A																				YPL246C				YNL273W	YJL062W
						YGL123W	YLR068W									YJL188C	YPL146C																				YNL045W				YCR093W	YMR261C
						YPL123C	YPR134W									YOR089C	YER002W																				YBR108W				YDR456W	YMR092C
						YOR089C	YDR427W									YLR154W-C	YAL025C																				YMR208W				YDR209C	YHR046C
						YBL011W	YHR016C									YMR294W-A	YNL244C																				YBR140C				YAR042W	YNL241C
						YLR345W	YKL151C									YNL244C	YLR175W																				YNL321W				YIR037W	YJL134W
						YGR141W	YLR167W									YKL172W	YJL188C																				YJL101C				YOR002W	YOR074C
						YJL079C	YOR089C									YLR175W	YLR154W-C																				YHR080C				YPR098C	YNL134C
						YOL062C	YCL067C									YER159C	YFR001W																				YLL026W				YHR047C	YJL020C
						YMR130W	YCR039C									YAL025C	YKL172W																				YDL164C				YNL219C	YIL108W
						YDR100W	YBL011W									YGL029W	YKL082C																				YOL020W				YBR054W	YKL057C
						YOR039W	YOR312C									YPR062W	YJL148W																				YML056C				YGL173C	YIL101C
						YIL103W	YDR279W									YDL153C	YDL153C																				YLL028W				YAL051W	YOR054C
						YML054C	YLR175W									YJL148W	YHR081W																				YBR026C				YKL157W	YHL047C
						YAL037C-B	YHR012W									YLR154W-F	YLR154W-F																				YLR001C				YOL087C	YDR307W
						YJL156C	YJL055W									YKL082C	YLR068W																				YPR020W				YDR457W	YDR093W
						YPL096W	YDL157C									YHR081W	YLR154W-E																				YGR201C				YGR205W	YDR276C
						YGL207W	YDL065C									YLR068W	YNL017C																				YER011W				YJR137C	YOR155C
						YDR272W	YML024W									YNL017C	YGL029W																				YFR019W				YBR136W	YOR065W
						YOR143C	YBR052C									YMR244W	YOR309C																				YLL058W				YER044C	YNL102W
						YGR024C	YPR020W									YOR309C	YMR244W																				YDL215C				YLR304C	YBR220C
						YJL188C	YGL030W									YLR154W-E	YMR269W																				YMR173W-A				YPL154C	YKL100C
						YBR026C	YML056C									YMR269W																					YDL093W				YDR027C	YNL280C
						YHR141C	YHL003C																														YIL108W				YIR007W	YBR108W
						YHR043C	YIL062C																														YLR178C				YIL136W	YJR117W
						YJL101C	YLR345W																														YHR039C				YJR121W	YER119C
						YDR400W	YBR104W																														YNR067C				YDR144C	YDR368W
						YKR070W	YLR406C																														YHR096C				YBL045C	YDR400W
						YML024W	YHR141C																														YNL200C				YBL007C	YAL017W
						YDR279W	YJL001W																														YJL171C				YOL129W	YBR166C
						YPR020W	YBR026C																														YLL040C				YCL040W	YCR030C
						YPL225W	YIL103W																														YML128C				YLL058W	YLR183C
						YML056C	YOL084W																														YAL060W				YBR241C	YEL047C
						YDL065C	YML054C																														YCL040W				YIL045W	YBR139W
						YFL045C	YMR178W																														YAL008W				YPL270W	YDR407C
						YOR312C	YMR260C																														YBR235W				YDR135C	YKL045W
						YGR183C	YKL163W																														YDR074W				YGR232W	YPL274W
						YJR135W-A	YDR399W																														YOR010C				YJR040W	YGL157W
						YDR427W	YFL045C																														YGR284C				YER011W	YKR054C
						YHL003C	YIL110W																														YGR043C				YDL195W	YKR013W
						YDL236W	YDR110W																														YDL217C				YBR169C	YCR093W
						YGL030W	YGR024C																														YPL058C				YCR067C	YJR138W
						YJL148W	YJL004C																														YJR001W				YDR141C	YKR088C
						YPR113W	YHL011C																														YEL053W-A				YOR321W	YGL083W
						YPR069C	YCR090C																														YDR100W				YKL127W	YDR222W
						YDR399W	YGR263C																														YBR126C				YHR079C	YKL034W
						YER012W	YLR104W																														YJR137C				YHL034W-A	YIL047C
						YDR032C	YDR137W																														YDR533C				YOL090W	YHR139C
						YNL222W	YGR183C																														YOR109W				YLR064W	YKL101W
						YIL062C	YDR366C																														YJL005W				YFL025C	YPL153C
						YDR110W	YOL129W																														YGR205W				YOR317W	YOR034C
						YDL153C	YCR020C-A																														YML070W				YHR094C	YOL057W
						YHL047C	YNL084C																														YMR088C				YNR030W	YDR457W
						YGR199W	YDR032C																														YDR032C				YGL167C	YBR088C
						YLR406C	YBR024W																														YJL091C				YBL015W	YGR170W
						YHR012W	YDL007W																														YCR061W				YJL060W	YKL157W
						YKL163W	YHR138C																														YHR092C				YLR130C	YPL249C
						YJL091C	YGL091C																														YNL115C				YGL161C	YGL173C
						YOL129W	YDR196C																														YOL129W				YBR004C	YNL300W
						YDR196C	YGL104C																														YBR280C				YNL044W	YOR347C
						YGR205W	YHL047C																														YGR199W				YNL297C	YPL256C
						YHL015W	YLR154W-F																														YHR137W				YBR126C	YDR261C
						YJL004C	YLR008C																														YPR117W				YEL053W-A	YKR076W
						YNL244C	YPL225W																														YPL184C				YDR122W	YJL115W
						YPR028W	YNL200C																														YGL226C-A				YGR254W	YKL085W
						YJL055W	YGL031C																														YJR073C				YDL022W	YLR304C
						YLR008C	YPL123C																														YAL005C				YHR099W	YDR456W
						YBR024W	YPL273W																														YJR127C				YLR008C	YPL154C
						YIL110W	YKL033W-A																														YPL006W				YGL006W	YNL219C
						YCR090C	YJL091C																														YMR090W				YOR331C	YDL156W
						YBR052C	YLR166C																														YDL085W				YOR215C	YHR047C
						YGR263C	YML128C																														YMR105C				YJL002C	YKR065C
						YBL026W	YBL040C																														YKL129C				YHR112C	YBL007C
						YLR154W-F	YBR137W																														YMR169C				YBR097W	YAR042W
						YJL001W	YGR199W																														YER053C				YBR133C	YGR038W
						YKL033W-A	YNR020C																														YBR056W				YDR406W	YAL051W
						YER117W	YKR088C																														YBL015W				YJR131W	YJR121W
						YGL031C	YPL010W																														YOR173W				YML059C	YMR179W
						YLR104W	YGR169C-A																														YPR043W				YHR104W	YOR002W
						YHL011C	YHL015W																														YPL036W				YGL073W	YDR135C
						YMR175W	YER009W																														YKR076W				YOR161C	YLR240W
						YMR178W	YLR367W																														YJL212C				YNL115C	YOL151W
						YPR087W	YNL222W																														YLR258W				YGL065C	YCL052C
						YHR022C	YPL036W																														YFR015C				YPL223C	YIR037W
						YOR283W	YML062C																														YLR149C				YDL135C	YJR137C
						YBL040C	YER117W																														YNL194C				YGL037C	YGR209C
						YBR159W	YOR283W																														YDR406W				YKL213C	YLR063W
						YNL147W	YJL031C																														YGR256W				YKR003W	YDL195W
						YNL084C	YKL166C																														YAL037C-B				YCR088W	YNL273W
						YDL137W	YDR370C																														YCL038C				YPR164W	YBL045C
						YML128C	YPL142C																														YBR214W				YCR012W	YDR376W
						YNR020C	YPL206C																														YGR248W				YGL206C	YBR136W
						YER009W	YIL136W																														YMR196W				YDL237W	YBR054W
						YLR367W	YJR135W-A																														YDL223C				YNL160W	YPR155C
						YBR137W	YGR284C																														YGR088W				YIL124W	YIL136W
						YDR137W	YPL237W																														YOR291W				YKL129C	YDR209C
						YPL237W	YDL137W																														YHR016C				YBR235W	YOR317W
						YGL091C	YBR192W																														YPR160W				YGL084C	YDR141C
						YPL142C	YKR042W																														YOL084W				YPR095C	YCL040W
						YPL273W	YPL220W																														YML100W				YOR109W	YDR144C
						YJR161C	YOR002W																														YHL021C				YMR208W	YPR128C
						YJL031C	YBR096W																														YOR227W				YKR027W	YOL007C
						YNR055C	YML063W																														YBR116C				YKR070W	YOL087C
						YPL010W	YER099C																														YML054C				YJR030C	YIR007W
						YPL186C	YJR058C																														YDL222C				YLL031C	YPR098C
						YKL166C	YPR087W																														YMR250W				YDR533C	YBR169C
						YLR166C	YBR159W																														YGL156W				YJL091C	YGL167C
						YDL007W	YOR261C																														YPR026W				YGL195W	YDR100W
						YKR088C	YGR043C																														YCL042W				YBR056W	YCR067C
						YHR121W	YHR022C																														YLR379W				YCL038C	YOL090W
						YKR042W	YHR063W-A																														YPR184W				YML120C	YHR099W
						YGR284C	YGR232W																														YOR273C				YJL005W	YJR040W
						YOR006C	YNR055C																														YBR117C				YDL021W	YOL129W
						YFL017W-A	YIL014W																														YDR453C				YLR078C	YPL270W
						YOR261C	YJL148W																														YNL339C				YLR149C	YDL022W
						YPL036W	YMR251W-A																																		YCR065W	YHR094C
						YPL152W	YNL244C																																		YOR185C	YHR079C
						YDR370C	YKL219W																																		YLR201C	YJL002C
						YIL136W	YGR034W																																		YBR053C	YOR321W
						YJR058C	YML004C																																		YJL079C	YGR232W
						YPL220W	YJL188C																																		YMR119W	YLL058W
						YMR230W	YPL152W																																		YOL075C	YNR030W
						YBR096W	YPL117C																																		YLR039C	YBR126C
						YGR034W	YNL147W																																		YML075C	YFL025C
						YKL219W	YOR006C																																		YOL155C	YDR027C
						YOR002W	YMR230W																																		YHR039C	YGL206C
						YML063W	YAL008W																																		YMR231W	YML059C
						YBR192W	YOL065C																																		YJR001W	YHL034W-A
						YKL058W	YGL158W																																		YPL123C	YLR130C
						YHR063W-A	YGR205W																																		YOR086C	YNL297C
						YOL065C	YHR121W																																		YBR003W	YBR241C
						YGR043C	YPR028W																																		YBR096W	YNL160W
						YJL164C	YBR166C																																		YOR169C	YCR088W
						YOR253W	YBR164C																																		YKL165C	YGR254W
						YPL206C	YBL026W																																		YJL068C	YGR296W
						YMR251W-A	YPR098C																																		YNL321W	YPL283C
						YGR232W	YDL153C																																		YDR127W	YOR109W
						YIL014W	YDR531W																																		YNL274C	YGL195W
						YPL117C	YNR074C																																		YLR024C	YBR004C
						YER074W-A	YLR441C																																		YNR055C	YEL053W-A
						YER099C	YJL164C																																		YDR470C	YGL037C
						YBR164C	YKL058W																																		YHR092C	YGL006W
						YDR322C-A	YOR253W																																		YKL151C	YPR164W
						YNR074C	YER074W-A																																		YBR072W	YGL073W
						YAL008W	YKL174C																																		YOR173W	YDL237W
						YML004C	YPR198W																																		YPL006W	YBR133C
						YPR100W	YML001W																																		YDR430C	YGL065C
						YLR441C	YPL186C																																		YJL095W	YBL015W
						YNL143C	YGR106C																																		YMR110C	YER044C
						YDR531W	YFL017W-A																																		YLR043C	YKL127W
						YKL056C	YPR100W																																		YJL052W	YLR064W
						YNL150W	YDR327W																																		YCR069W	YDR122W
						YBR166C	YOR118W																																		YKL197C	YHR104W
						YGR106C	YNL115C																																		YML004C	YJL060W
						YPR198W	YJR161C																																		YLR189C	YBR235W
						YPR098C	YDR322C-A																																		YJL172W	YLR008C
						YOR369C	YDR447C																																		YOL017W	YCR012W
						YDR327W	YKL056C																																		YML056C	YDL135C
						YGL102C	YOR277C																																		YLR422W	YJR131W
						YML001W	YOR369C																																		YDR531W	YMR208W
						YDR447C	YCL038C																																		YOR356W	YHR112C
						YKL174C	YOR102W																																		YAL060W	YGL161C
						YNL115C	YLR043C																																		YIR038C	YOR161C
						YDL135C	YGL102C																																		YDR074W	YGL084C
						YLR043C	YDL115C																																		YBR116C	YNL115C
						YLR198C	YOR289W																																		YBR214W	YIL124W
						YDR068W	YNL143C																																		YER070W	YLL031C
						YGR088W	YDL135C																																		YAL001C	YNL044W
						YMR090W	YNL150W																																		YCL057W	YDR406W
						YOR289W	YGR088W																																		YNL262W	YKL129C
						YOR118W	YMR090W																																		YFR021W	YER011W
						YLR076C	YGR209C																																		YOL011W	YKL213C
						YOR102W	YGL156W																																		YJR066W	YML075C
						YGL156W	YMR143W																																		YPL203W	YJL005W
						YCL038C	YDR068W																																		YKL215C	YCR065W
						YDL115C	YHL034W-A																																		YLL026W	YJL091C
						YBR056W	YGL161C																																		YML070W	YHR039C
						YKL083W	YLR076C																																		YCR032W	YDR533C
						YGR209C	YLR078C																																		YPR191W	YPR095C
						YOR309C	YDR373W																																		YLR134W	YCL038C
						YGL161C	YPR132W																																		YDR516C	YGR205W
						YMR143W	YAL037C-B																																		YKL203C	YJR001W
						YPR132W	YBR056W																																		YLR087C	YDR127W
						YLR078C	YIL111W																																		YHR022C	YKL165C
						YHL034W-A	YOR309C																																		YDL093W	YIL045W
						YDR373W	YOR285W																																		YFL014W	YOR086C
						YLR262C-A	YHR096C																																		YBR140C	YKR070W
						YOR285W	YMR269W																																		YOR383C	YLR078C
						YHR096C	YLR198C																																		YPL246C	YNR055C
						YIL111W	YMR173W-A																																		YNL194C	YJL079C
						YEL039C	YLR262C-A																																		YPR127W	YOL155C
						YBL077W	YBL077W																																		YIL002C	YBR056W
						YOR169C	YKL083W																																		YNL138W	YKR027W
						YMR173W-A	YEL039C																																		YPR020W	YOL075C
						YHR054C	YOR169C																																		YOR273C	YBR097W
							YHR054C																																		YCL042W	YBR096W
							YMR175W																																		YCL024W	YHR092C
																																									YDL085W	YOR185C
																																									YMR173W-A	YPL223C
																																									YNL200C	YML120C
																																									YBR280C	YPL006W
																																									YDL164C	YLR024C
																																									YML054C	YJL172W
																																									YKL103C	YJR030C
																																									YHR033W	YLR201C
																																									YCR061W	YML004C
																																									YFR019W	YJL068C
																																									YLR258W	YDR430C
																																									YGL226C-A	YMR231W
																																									YHR016C	YML056C
																																									YOR291W	YBR072W
																																									YHR137W	YNL321W
																																									YPR026W	YMR119W
																																									YJL164C	YKR003W
																																									YDR039C	YLR043C
																																									YDR032C	YOR356W
																																									YHR054C	YBR053C
																																									YDL204W	YNL262W
																																									YNL045W	YJL052W
																																									YBR026C	YMR110C
																																									YGR199W	YJL095W
																																									YPR115W	YIR038C
																																									YPR117W	YML070W
																																									YLR454W	YJR066W
																																									YMR304W	YCL057W
																																									YFR053C	YLR422W
																																									YOR227W	YDR074W
																																									YGR284C	YLR189C
																																									YFR052C-A	YOL011W
																																									YAL005C	YLL026W
																																									YMR090W	YCR069W
																																									YLL040C	YOR173W
																																									YGR248W	YKL203C
																																									YML100W	YKL215C
																																									YLR379W	YPR191W
																																									YML128C	YCR032W
																																									YPR028W	YDR531W
																																									YDR545W	YBR140C
																																									YLR467W	YFL014W
																																									YOR396W	YLR149C
																																									YMR169C	YER070W
																																									YMR196W	YAL060W
																																									YOL084W	YDL093W
																																									YMR105C	YAL001C
																																									YGR043C	YBR003W
																																									YPL036W	YLR087C
																																									YGR256W	YKL197C
																																									YDR453C	YPL246C
																																									YPR160W	YKL151C
																																									YPR184W	YOR169C
																																									YGR088W	YNL138W
																																									YMR250W	YNL274C
																																									YGL156W	YFR021W
																																									YBR117C	YBR214W
																																									YLR178C	YDR516C
																																									YDL222C	YPR127W
																																									YHR096C	YLR134W
																																									YDL223C	YDL021W
																																										YOR383C
																																										YMR173W-A
																																										YKL103C
																																										YDL164C
																																										YLR039C
																																										YDR470C
																																										YPL203W
																																										YFR019W
																																										YPR020W
																																										YOR273C
																																										YCR061W
																																										YDR039C
																																										YOR291W
																																										YHR137W
																																										YOL017W
																																										YGR199W
																																										YNL045W
																																										YDR032C
																																										YCL024W
																																										YBR116C
																																										YLR258W
																																										YBR026C
																																										YBR280C
																																										YNL200C
																																										YHR033W
																																										YHR016C
																																										YML054C
																																										YHR054C
																																										YIL002C
																																										YDL204W
																																										YGR284C
																																										YGL226C-A
																																										YFR053C
																																										YMR304W
																																										YLR454W
																																										YPR117W
																																										YDL085W
																																										YLL040C
																																										YAL005C
																																										YPR026W
																																										YML128C
																																										YNL194C
																																										YML100W
																																										YOR227W
																																										YPR028W
																																										YMR196W
																																										YPR115W
																																										YMR105C
																																										YPL036W
																																										YPR160W
																																										YMR090W
																																										YFR052C-A
																																										YPR184W
																																										YGR248W
																																										YMR169C
																																										YMR250W
																																										YLR379W
																																										YGL156W
																																										YGR088W
																																										YOL084W
																																										YHR096C
																																										YOR331C
																																										YOR215C
																																										YPL123C
																																										YHR022C
																																										YCL042W
																																										YJL164C
																																										YDR545W
																																										YLR467W
																																										YOR396W
																																										YGR043C
																																										YGR256W
																																										YDR453C
																																										YBR117C
																																										YLR178C
																																										YDL222C
																																										YDL223C

## Sheet: 45fL
wt.vs.rpl22a					wt.vs.rpl22b					wt.vs.rpl34a					wt.vs.rpl34b					rpl22a.vs.rpl22b					rpl22a.vs.rpl34a					rpl22a.vs.rpl34b					rpl22b.vs.rpl34a					rpl22b.vs.rpl34b					rpl34a.vs.rpl34b
babel	DESeq2	edgeR	intersection		babel	DESeq2	edgeR	intersection		babel	DESeq2	edgeR	intersection		babel	DESeq2	edgeR	intersection		babel	DESeq2	edgeR	intersection		babel	DESeq2	edgeR	intersection		babel	DESeq2	edgeR	intersection		babel	DESeq2	edgeR	intersection		babel	DESeq2	edgeR	intersection		babel	DESeq2	edgeR	intersection
YPR028W	YDR343C	YDR343C	YDR278C		YDR278C	YNL339C	YNL327W	YDR278C		YGR069W	YKR097W	YNL327W	YOR374W		YKL083W	YDR089W	YGL028C	YLR062C		YGR164W	YPR043W	YDR343C	YGR164W		YLR198C	YNL017C	YLR154C-H	YNL017C		YDR278C	YLR154C-H	YLR154C-H	YDR278C		YBL053W	YNL017C	YNL017C	YNL017C		YNL017C	YLR154C-H	YLR154C-H	YNL017C		YPL250W-A	YLR154C-H	YPL249C-A	YPL249C-A
YNL327W	YKR097W	YNL327W	YKR097W		YMR143W	YDR278C	YDR278C	YMR143W		YNL143C	YOR374W	YOL155C	YLR304C		YGR069W	YHR092C	YDR406W	YOR234C		YPR043W	YCR024C-A	YHL047C	YPR043W		YNL174W	YDR278C	YLR156C-A	YDR278C		YGR088W	YLR156C-A	YLR156C-A	YGR088W		YBR266C	YDR278C	YLR154C-H	YDR278C		YDR278C	YLR156C-A	YLR156C-A	YDR278C		Q0055	YPL249C-A	YER056C-A	YLR390W-A
YMR250W	YMR120C	YKR097W	YMR143W		YKR097W	YKR097W	YKR097W	YKR097W		YKL083W	YLR304C	YKR097W	YMR006C		YMR269W	YDR406W	YER124C	YFR032C-A		YLR154W-E	YGR160W	YPR043W	YLR154W-E		YBR266C	YGR069W	YLR157C-C	YGR069W		YMR250W	YLR157C-C	YLR157C-C	YMR250W		YNL017C	YLR154W-E	YLR156C-A	YLR154W-E		YMR250W	YLR157C-C	YLR157C-C	YMR250W		Q0050	YLR390W-A	YDR497C	YLR044C
YJL078C	YLR286C	YNR067C	YPR043W		YNL017C	YNL285W	YJL078C	YNL017C		YNL179C	YMR006C	YGL028C	YPL231W		YOR309C	YOL155C	YNL327W	YNL162W		YLR154C-H	YOR135C	YCR024C-A	YLR154C-H		YDL062W	YFR032C-A	YLR159C-A	YFR032C-A		YDL223C	YLR159C-A	YLR159C-A	YDL223C		YKL036C	YGR069W	YLR157C-C	YGR069W		YGR088W	YLR159C-A	YLR159C-A	YGR088W		Q0105	YLR044C	YLR154C-H
YNR067C	YDR278C	YJL078C	YGR088W		YPR132W	YNL017C	YNL285W	YPR132W		YLR198C	YPL231W	YEL053W-A	YLR180W		YNL143C	YLR258W	YHR092C	YHR141C		YLR156C-A	YLR198C	YGR160W	YLR156C-A		YDR521W	YMR294W-A	YNL017C	YMR294W-A		YNL017C	YDR278C	YDR278C	YNL017C		YDR521W	YGR164W	YLR159C-A	YGR164W		YGR164W	YNL017C	YNL017C	YGR164W		Q0085	YLR156C-A	YLR156C-A
YOR146W	YAL062W	YMR120C	YKL056C		YDR447C	YLR286C	YKL164C	YDR447C		YBL053W	YLR180W	YKL212W	YBR092C		YGR169C-A	YKL148C	YDR089W	YOR230W		YLR157C-C	YBR208C	YOR135C	YLR157C-C		YNL114C	YOL109W	YDR278C	YOL109W		YCR061W	YNL017C	YNL017C	YCR061W		YGL123C-A	YLR198C	YDR278C	YLR198C		YPL036W	YDR278C	YDR278C	YPL036W		Q0250	YLR157C-C	YLR157C-C
YPL163C	YMR189W	YGL028C	YOR369C		YKL056C	YAL062W	YNL017C	YKL056C		YCR024C-B	YBR092C	YOR128C	YLR058C		YNL179C	YLL040C	YLR258W	YDR500C		YLR159C-A	YER103W	YLR198C	YLR159C-A		YOL079W	YNL143C	YGR069W	YNL143C		YFR032C-A	YLR154W-E	YLR154W-E	YFR032C-A		YNL179C	YOR265W	YLR154W-E	YMR294W-A		YGR284C	YLR154W-E	YLR154W-E	YGR284C		Q0275	YLR159C-A	YLR159C-A
YDR278C	YLR058C	YKL164C	YGL102C		YBR056W	YBL071W-A	YLR286C	YBR056W		YDR183C-A	YLR058C	YJL042W	YBL099W		YLR198C	YMR189W	YOL155C	YJL188C		YNL017C	YJL189W	YBR208C	YNL017C		YOR146W	YPL250W-A	YFR032C-A	YPL250W-A		YDL022W	YFR032C-A	YFR032C-A	YDL022W		YGR114C	YMR294W-A	YGR069W	YNL143C		YHR092C	YGR164W	YGR164W	YHR092C		YGL006W	YDR278C	YDR278C
YKR097W	YNL066W	YBR072W	YLR441C		YLR441C	YMR189W	YAL062W	YLR441C		YHR219W	YBL099W	YPL058C	YDR044W		YOR053W	YOR230W	YJL052W	YPL090C		YLR154C-G	YMR120C	YER103W	YLR154C-G		YER066C-A	YLR185W	YLR154W-E	YLR185W		YDR500C	YDR500C	YDR500C	YDR500C		YLL066C	YNL143C	YGR164W	YOL109W		YKL083W	YKL083W	YKL083W	YKL083W		Q0130	YNL017C	YNL017C
YMR143W	YPR043W	YDR278C	YPR132W		YGL102C	YOR348C	YNR067C	YGL102C		YJL202C	YDR044W	YIL155C	YDR417C		YLR169W	YNL066W	YKL148C			YGR160W	YLR262C-A	YJL189W	YGR160W		YDR285W	YER131W	YMR294W-A	YER131W		YKR013W	YOL109W	YOL109W	YKR013W		YJL202C	YHL031C	YLR198C	YDR339C		YDR500C	YNL285W	YNL285W	YDR500C		Q0065	YLR154W-E	YLR154W-E
YPR043W	YGR160W	YLR286C	YOR285W		YGR088W	YMR011W	YBL071W-A	YGR088W		YKL066W	YDR417C	YPL240C	YJR016C		YLR062C	YHR099W	YNR067C			YER103W	YGR032W	YMR120C	YER103W		YOR304C-A	YGL103W	YOL109W	YGL103W		YGR284C	YKL172W	YKL172W	YGR284C		YLR466C-A	YLR200W	YDR445C	YOR309C		YNL160W	YGR115C	YGR115C	YNL160W		YEL025C	YER056C-A	YGR164W
YGR088W	YDR216W	YAL062W	YGL147C		YLR043C	YMR120C	YHR143W	YLR043C		YNL170W	YJR016C	YLR305C	YAL012W		YOR234C	YJL005W	YLL040C			YHL034W-A	YNL147W	YLR262C-A	YHL034W-A		YBL053W	YDR500C	YNL143C	YKL156W		YJL172W	YGR280C	YGR280C	YJL172W		YLR467C-A	YOL109W	YNL285W	YFR001W		YOR317W	YDR445C	YDR445C	YOR317W		YPR117W	YGR164W	YER006W
YKL056C	YPR125W	YMR189W	YBR056W		YMR251W-A	YGR164W	YMR189W	YMR251W-A		YPR145C-A	YAL012W	YDR135C	YHR025W		YFR032C-A	YGL006W	YMR189W			YMR120C	YLR287C-A	YGR032W	YMR120C		YNL179C	YKL156W	YPL250W-A	YLR276C		YML128C	YKL082C	YKL082C	YML128C		YOR396C-A	YDR339C	YMR294W-A	YDL061C		YNL179C	YLR198C	YOL109W			Q0060	YER006W	YER095W
YOR369C	YLR303W	YLR058C	YGR034W		YBR159W	YPL183W-A	YOR348C	YBR159W		YNL266W	YHR025W	YIL047C	YGR118W		YNL162W	YLR286C	YOR230W			YNL147W	YHR063W-A	YNL147W	YNL147W		YNL188W	YLR276C	YLR185W	YLR325C		YDR343C	YMR294W-A	YMR294W-A			YDL068W	YPL170W	YNL143C	YLR185W		YAL004W	YOL109W	YLR198C			Q0045	YER055C	YER055C
YGL102C	YDR116C	YNL066W	YHR094C		YGR284C	YGL153W	YMR011W	YGR284C		YGL123C-A	YJR077C	YKL148C	YDR064W		YHR141C	YDR216W	YHL028W			YHR063W-A	YNR067C	YLR287C-A	YHR063W-A		YDL085C-A	YMR194W	YER131W	YNL175C		YKL083W	YGL103W	YGL103W			YDR278C	YER030W	YOL109W	YBR016W		YBR051W	YDR500C	YOR309C			YER184C	YKL172W	YCL025C
YLR441C	YBR208C	YGR160W	YMR120C		YHL034W-A	YOR301W	YBR296C	YHL034W-A		YMR269W	YGR118W	YBR039W	YDR450W		YOR230W	YBR072W	YNL066W			YLR058C	YJR148W	YHR063W-A	YLR058C		YGR228W	YPL026C	YDR445C	YOR198C		YLR198C	YCL059C	YCL059C			YGL041C-B	YOR309C	YDR339C	YKL156W		YER067C-A	YOR309C	YGR069W			YIL169C	YDR002W	YDR002W
YPR132W	YEL053W-A	YPR043W	YDL125C		YOR369C	YML052W	YNL066W	YOR369C		YER066C-A	YDR064W	YJR109C	YDL191W		YDR500C	YJL078C	YHR099W			YOR135C	YOL100W	YNR067C	YOR135C		YIL142C-A	YLR325C	YGL103W	YNL061W		YOR309C	YLR185W	YLR185W			YGR236C	YOL077W-A	YOR309C	YDR086C		YGR236C	YGR069W	YDR500C			YDL039C	YDR497C	YKL172W
YOR285W	YML091C	YDR216W	YER117W		YGR199W	YDL117W	YMR120C	YGR199W		YCR014C	YDR450W	YMR008C	YJL190C		YJL188C	YML100W	YGL006W			YBR208C	YHL034W-A	YJR148W	YBR208C		YDR343C	YOR056C	YJL188C	YJL159W		YGR115C	YNL079C	YNL079C			YHR028W-A	YDR121W	YLR062C	YER131W		YJL202C	YFR001W	YFR001W			Q0160	YBR084C-A	YLR154W-F
YGL147C	YBR146W	YPR125W	YHR141C		YGR034W	YLL032C	YGR164W	YGR034W		YCR041W	YDL191W	YDR497C	YDR399W		YPL090C	YBL015W	YJL005W			YMR099C	YGL103W	YOL100W	YMR099C		YGL123C-A	YNL175C	YOR234C	YHR094C		YJL189W	YPL239W	YPL239W			YPL250W-A	YBR269C	YDL061C	YLR276C		YKL036C	YGL029W	YGL029W			YBL088C	YER095W	YAL005C
YBR056W	YPR035W	YLR303W	YOR096W		YJL136C	YNL191W	YPL183W-A	YJL136C		YEL039C	YJL190C	YIL022W	YML063W			YDR380W	YDR216W			YLR337C	YLR058C	YHL034W-A	YLR337C		YML090W	YOR198C	YKL156W	YML085C		YHR152W	YHR088W	YHR088W			YAR030C	YGL029W	YLR185W	YPL154C			YBL028C	YBL028C			YDR040C	YLR154W-F	YBR084C-A
YGR034W	YDR089W	YDR116C	YAL062W		YDL135C	YIL131C	YGL153W	YDL135C		YER187W	YDR399W	YKL185W	YOL127W			YOR065W	YLR286C			YMR011W	YNL220W	YGL103W	YMR011W		YGR114C	YNL061W	YLR276C	YMR143W		YGR169C-A	YPL146C	YPL146C			YBR051W	YFR001W	YBR016W	YMR143W			YER029C	YER029C			YER098W	YGR118W	YGR118W
YHR094C	YAR015W	YBR208C	YLR076C		YGR164W	YLR190W	YOR301W	YGR164W		YGL029W	YML063W	YER017C	YDR447C			YKL038W	YJL078C			YNL220W	YMR099C	YLR058C	YNL220W		YHR152W	YJL159W	YGR164W	YPL154C		YNL179C	YNL110C	YNL110C			YOL132W	YPL238C	YFR001W	YML056C			YDR121W	YDR121W			YGL248W	YER102W	YER126C
YMR120C	YDL117W	YEL053W-A	YMR251W-A		YMR230W	YPR125W	YDL117W	YMR230W		YGR228W	YOL127W	YGL197W	YGR085C			YEL053W-A	YBR072W			YJR148W	YNL305C	YNL220W	YJR148W		YOL132W	YHR094C	YDL061C	YLR438W		YMR269W	YGR164W	YGR164W			YDR114C	YDL061C	YFR032C-A	YGL026C			YOR265W	YGR169C-A			YHR096C	YER126C	YER102W
YDL125C	YPR138C	YML091C	YJR123W		YOR285W	YDL240W	YLL032C	YOR285W		YIL071W-A	YDR447C	YMR006C	YJR123W			YJR137C	YGR088W			YGL126W	YML025C	YMR099C	YGL126W		YHR071W	YML085C	YLR325C	YFL037W		YOR146W	YMR014W	YMR014W			YDL062W	YLR185W	YKL156W	YJR121W			YGR169C-A	YOR265W			YJL112W	YML026C	YML026C
YER117W	YLR180W	YBR146W	YML128C		YOR096W	YLR099C	YML052W	YOR096W		YLR010C	YGR085C	YPL249C-A	YLR441C			YOL081W	YBL015W			YBR241C	YHL020C	YNL305C	YBR241C		YGR236C	YMR143W	YNL175C	YHR042W		YGR259C	YLR009W	YLR009W			YDR285W	YBR016W	YDR086C	YNL160W			YLR062C	YKL122C			YMR306W	YNL162W	YNL162W
YHR141C	YGR004W	YPR035W	YLR286C		YLR076C	YGR004W	YNL191W	YLR076C		YMR107W	YJR123W	YBR080C	YDL075W			YBL101C	YML100W			YGR032W	YLR348C	YML025C	YGR032W		YHR028W-A	YPL154C	YDL081C	YNL160W			YPL249C-A	YPL249C-A			YHL030W-A	YOR226C	YJL188C	YLR378C			YKL122C	YLR062C			YNL144C	YJL190C	YLR062C
YOR096W	YKR080W	YAR015W	YLR058C		YMR011W	YDR116C	YIL131C	YMR011W		YMR141C	YLR367W	YBR086C	YKR094C			YCR048W	YOR065W			YJL189W	YBR241C	YHL020C	YJL189W		YGL041C-B	YLR438W	YBL092W	YKR013W			YDR445C	YDR445C			YIL057C	YBR089C-A	YPR051W	YEL053W-A			YMR294W-A	YMR294W-A			YJR066W	YGR085C	YJL190C
YAL062W	YLR190W	YDL117W	YLR337C		YGL030W	YAL024C	YPR125W	YGL030W		YMR294W	YLR441C	YLR071C	YBR181C			YKR097W	YKL038W			YPL250W-A	YLR337C	YKL019W			YKL036C	YFL037W	YEL034C-A	YAL005C			YPR133C	YPR133C			YJR155W	YKL156W	YER131W	YCR034W			YLR185W	YLR185W			YDL231C	YGL105W	YGL105W
YLR076C	YGR032W	YDR089W	YPR035W		YLR301W	YLR154C-H	YLR190W	YLR301W		YNR025C	YDL075W	YML031W	YPR102C			YLR058C	YDR380W			YDR343C	YGL126W	YLR348C			YAR030C	YHR042W	YOR198C				YER126C	YGR069W			YLR334C	YDR045C	YOR234C	YDR432W			YKL172W	YKL172W			YFL050C	YPR102C	YGR085C
YMR251W-A	YLR450W	YPR138C	YGL030W		YML056C	YLR156C-A	YLR099C	YML056C		YBR047W	YKR094C	YJR127C	YDR500C			YMR196W	YEL053W-A			YBR072W	YPL183W-A	YBR241C			YDR133C	YNL160W	YOR294W				YGR069W	YER002W			YNL114C	YDR086C	YPR044C	YPL036W			YLR200W	YLR200W			YKR061W	YBR025C	YBR025C
YJR123W	YBR093C	YLR180W	YJL136C		YBR026C	YLR157C-C	YDL240W	YBR026C		YMR065W	YBR181C	YPR024W	YHR010W			YKL062W	YJR137C			YPL198W	YKL183W	YGL125W			YDR281C	YKR013W	YPR102C				YER002W	YER126C			YNL174W	YDR500C	YLR167W	YOR317W			YNL036W	YNL036W			YML034W	YGL103W	YPR102C
YML128C	YMR024W	YGR004W	YML063W		YML063W	YLR159C-A	YGR004W	YML063W		YOR309C	YPR102C	YNL241C	YMR260C			YMR006C	YOL081W			YPL036W	YDR040C	YLR337C			YER121W	YAL005C	YGL189C				YDL121C	YDL121C			YOL014W	YGR004W	YLR154W-C	YAL005C			YGR280C	YGR280C			YOL081W	YEL034C-A	YDR445C
YLR286C	YGR204W	YKR080W	YOR063W		YOR063W	YAR015W	YDR116C	YOR063W		YCR097W	YDR500C	YCR067C	YGR106C			YGL197W	YBL101C			YMR173W	YHR022C	YIL023C			YGR259C	YLR154C-H	YML026C				YER103W	YER103W			YOL099C	YER131W	YLR276C				YDL061C	YNL143C			YOL082W	YPR145W	YGL103W
YLR058C	YPL265W	YBR093C	YBR164C		YAL062W	YAL032C	YAL024C	YAL062W		YDR199W	YHR010W	YDR028C	YPR062W			YCR069W	YKR097W			YEL053W-A	YGL166W	YGL126W			Q0050	YLR156C-A	YDR382W				YNL002C	YEL051W			YPR145C-A	YHR088W	YLR325C				YER159C	YDL061C			YPR009W	YDR445C	YPR145W
YLR337C	YKL185W	YGR032W	YDL223C		YDL125C	YDL155W	YLR154C-H	YDL125C		YDR504C	YMR260C	YLR399C	YGL031C			YLR304C	YCR048W			YPL240C	YLR162W	YPL183W-A			YBL043W	YLR157C-C	YDR471W				YEL051W	YNL002C			YPR150W	YER002W	YLR162W				YDR460W	YDR412W			YER187W	YLR175W	YPR163C
YPR035W	YER091C	YLR450W	YKR042W		YGL156W	YOR226C	YLR156C-A	YGL156W		YKL118W	YGR106C	YER023W	YML026C			YJR066W	YKL062W			YDL223C	YLR076C	YKL183W			YBL107C	YLR159C-A	YML024W				YER131W	YER131W			YBR277C	YLR276C	YBL092W				YDR412W	YDR460W			YBR033W	YPR163C	YLR175W
YGL030W	YLR357W	YPL265W	YDR447C		YKR042W	YBR146W	YLR157C-C	YKR042W		YMR316C-A	YPR062W	YBR126C	YIL148W			YER091C	YMR196W			YPL163C	YMR011W	YDR040C			YDL039C	YLR154W-E	YLR167W				YLR449W	YLR449W			YMR172C-A	YJR072C	YPL198W				YAL025C	YER159C			YDL037C	YAL003W	YAL003W
YJL136C	YGL039W	YLR190W	YLR154W-C		YPR028W	YGR146C	YLR159C-A			YOL014W	YGL031C	YKL032C	YPR132W			YPL085W	YMR006C			YIL117C	YLR154W-B	YHR022C			YDL177C	YER056C-A	YNL061W				YDL148C	YDL148C			YDL239C	YPL154C	YCR013C				YNL143C	YAL025C			YMR009W	YMR242C	YEL034C-A
YML063W	YGR202C	YMR024W	YBR054W		YMR250W	YLR180W	YAL032C			YPR002C-A	YML026C	YJR137C	YGL103W			YGR204W	YGL197W			YJL130C	YLR154C-H	YGL166W			YDR022C	YDR445C	YHL015W				YOL077C	YOL077C			YAL045C	YMR143W	YEL034C-A				YPR143W	YPR143W			YOR381W	YLR449W	YLR449W
YOR063W	YGR082W	YGR204W	YNL312W		YJL078C	YLR058C	YAR015W			YCR020W-B	YIL148W	YNL236W	YLR406C			YML117W	YLR058C			YPL231W	YLR156C-A	YLR162W			YDR162C	YJL188C	YLR029C				YPL043W	YNL143C			YGR154C	YML056C	YDR025W				YFR036W-A	YFR036W-A			Q0070	YNL096C	YMR242C
YBR164C	YLR099C	YKL185W	YPR113W		YNL327W	YHR180W-A	YDL155W			YER158W-A	YPR132W	YKL038W	YDR471W			YNL236W	YER091C			YLR259C	YLR157C-C	YLR076C			YGR142W	YGR164W	YDL075W				YAL025C	YPL043W			YHR050W-A	YGL026C	YML026C				YCL059C	YCL059C			YDR499W	YKR059W	YKR059W
YDL223C	YOR301W	YER091C	YAR015W		YNL138W	YKL185W	YOR226C			YDR058C	YGL103W	YJL005W	YBR154C			YCR030C	YJR066W			YGR157W	YLR159C-A	YMR011W			YLL009C	YOR234C	YGL031C				YNL143C	YAL025C			YML090W	YJR121W	YDR471W				YMR014W	YCR087W			YLL038C	YMR309C	YLL008W
YKR042W	YOL019W	YGL039W				YKR080W	YBR146W			YGR035W-A	YLR406C	YOR171C	YKL056C			YOL111C	YCR069W			YLR154W-C	YLR154W-E	YLR154W-B			YML057C-A	YDL061C	YIL091C				YKR081C	YKR081C			YOR318C	YNL160W	YGL147C				YCR087W	YMR014W			YLR343W	YGR148C	YNL096C
YDR447C	YBR130C	YLR357W				YOL058W	YGR146C			YGR064W	YDR471W	YLL028W	YGR034W			YNL321W	YLR304C			YHR183W	YLR154C-G	YLR154C-H			YMR294W	YDL081C	YOR293W				YDR365C	YDR365C			Q0130	YLR378C	YDL075W				YCR083W	YCR083W			YER060W-A	YDL075W	YMR309C
YLR154W-C	YNL285W	YGR202C				YJR111C	YLR180W			YGR169C-A	YPL010W	YLR179C	YOR182C			YHR186C	YPL085W				YNL285W	YLR156C-A			YNL266W	YBL092W	YGR148C				YLR276C	YLR276C			YAL004W	YEL053W-A	YDL136W				YLR154W-F	YIL008W			YGR098C	YAL035W	YDL075W
YBR054W	YGL058W	YLR099C				YPR035W	YNL036W			YLR169W	YBR154C	YGR052W	YER131W			YML091C	YML117W				YNL017C	YLR157C-C			YNR065C	YEL034C-A	YAL003W				YDR087C	YDR087C			YBR045C	YCR034W	YPR102C				YMR011W	YKL082C			Q0075	YHR170W	YGR148C
YNL312W	YLR356W	YGR082W				YNL104C	YHR180W-A			YLR466C-A	YKL056C	YHR206W	YLR325C			YML072C	YGR204W				YMR303C	YLR159C-A			YOL014W	YML026C	YML074C				YDR280W	YDR280W			YCR014C	YDR432W	YBR084C-A				YIL008W	YMR011W			Q0110	YDR450W	YAL035W
YPR113W	YKR028W	YBR130C				YER091C	YLR058C			YLR467C-A	YGR034W	YNL118C	YDR339C			YBR229C	YNL236W				YGR164W	YLR154W-E			YOR041C	YGL189C	YBR084C-A				YMR194W	YMR194W			YCR096C	YPL036W	YLR029C				YKL082C	YLR154W-F			Q0115	YMR186W	YHR170W
YAR015W	YBR039W	YOL019W				YGL127C	YKL185W			YOR015W	YOR182C	YLL013C	YPL090C			YHR102W	YMR120C				YLR061W	YLR154C-G			YOR265W	YML024W	YER074W				YOR056C	YOR056C			YDL085C-A	YOR317W	YOR293W				YPR133C	YPR133C			Q0120	YMR146C	YDR060W
	YDL155W	YOR301W				YDL182W	YKR080W			YOR396C-A	YER131W	YKL184W	YOR312C			YPR184W	YCR030C					YNL285W			YPL158C	YOR294W	YMR142C				YKR039W	YKR039W			YDR136C	YAL005C	YAL003W				YLR009W	YLR009W			Q0255	YGR180C	YMR146C
	YOR128C	YGL058W				YPR145W	YOL058W			YPR200C	YLR325C	YMR237W	YHR063W-A			YDR093W	YOL111C					YNL017C			YOR189W	YPR102C	YDR025W				YNL292W	YNL292W			YEL023C	YLR154C-H	YCR031C				YBR122C	YBR122C			YAL002W	YMR142C	YDR450W
	YCL030C	YNL285W				YGR082W	YJR111C			YPR204W	YDR339C	YPR125W	YHL015W			YLR450W	YNL321W					YMR303C			Q0070	YDR471W	YBL072C				YMR120C	YHR039C-A			YER066C-A	YLR156C-A	YER074W				YHR081W	YHR081W			YAL031C	YLR029C	YMR186W
	YKL062W	YLR356W				YLR357W	YPR035W			YOL099C	YPL090C	YDR216W	YKL156W			YHR033W	YHR186C					YGR164W			YAL045C	YDR382W	YMR242C				YOR276W	YMR120C			YFR032C-B	YLR157C-C	YBL027W				YNL079C	YNL079C			YAL034C	YER177W	YLR029C
	YPR124W	YKR028W				YFR055W	YNL104C			YOL029C	YOR312C	YBR059C	YHR141C			YLR118C	YHR102W					YLR061W			YBL031W	YLR167W	YBR011C				YHR039C-A	YOR276W			YGR025W	YLR159C-A	YHL015W				YHR052W-A	YHR052W-A			YAL042C-A	YBL072C	YMR142C
	YKL038W	YBR039W				YDR213W	YER091C			YDR281C	YHR063W-A	YLR094C	YML024W			YDR456W	YML091C								YCR020W-B	YLR029C	YGL102C				YPR125W	YPR125W			YIR019C	YDR445C	YJR145C				YHR054W-A	YHR054W-A			YAL051W	YLR167W	YGR180C
	YNL104C	YDL155W				YBR093C	YDL182W			YDR285W	YHL015W	YGL140C	YGL231C			YMR237W	YML072C								YDL069C	YHL015W	YIL148W				YER006W	YDR056C			YKL071W	YNL285W	YGL103W				YML053C	YML053C			YAR050W	YGR214W	YNL247W
	YOL058W	YOR128C				YHR215W	YGL127C			YGR053C	YKL156W	YLR248W	YNL162W			YHR163W	YBR229C								YDL185C-A	YDL075W	YJL138C				YDR056C	YER006W			YKL161C	YER056C-A	YBL072C				YPL013C	YOR226C			YBL005W	YML074C	YER177W
	YIL119C	YKL062W				YDR089W	YPR145W			YLR434C	YHR141C	YDR502C	YOR167C			YDR074W	YLR118C								YDR029W	YGL031C	YBL027W				YGR103W	YGR103W			YKR015C	YLR062C	YML024W				YPL239W	YPL239W			YBL014C	YBL092W	YBL072C
	YDR151C	YNL104C				YMR036C	YGR082W			YOR053W	YML024W	YAL019W	YGL147C			YFL033C	YDR093W								YFR046C	YAL003W	YGL147C				YDR083W	YDR083W			YNR056C	YFR032C-A	YDR382W				YOR226C	YPL013C			YBL071C	YML073C	YML074C
	YLL041C	YKL038W				YNL310C	YDR213W			YAR030C	YGL231C	YLR403W	YDR086C			YOR273C	YHR033W								YIL169C	YOR293W	YGL135W				YML074C	YML074C			YNR065C	YJL188C	YML073C				YDR280W	YDR280W			YBL075C	YLR048W	YGR214W
	YMR290C	YPR124W				YDR445C	YBR093C			YBL062W	YNL162W	YBR010W	YER117W			YLR219W	YPR184W								YJL202C	YML074C	YHL033C				YHR066W	YHR066W			YPR151C	YLR154W-C	YPL090C				YIL127C	YIL127C			YBL085W	YGL189C	YBL092W
	YPL137C	YCL030C				YLR061W	YLR357W			YCR096C	YOR285W	YNL197C	YOR293W			YLR399C	YLR450W								YLR458W	YBR084C-A	YDL185W				YBR279W	YBR279W			YPR204W	YJL189W	YMR142C				YJR072C	YJR072C			YBR043C	YDR471W	YML073C
	YGR061C	YOL058W				YOL005C	YFR055W			YFR001W	YOR167C	YDL060W	YLR167W			YNL139C	YML120C								YLR466C-A	YMR142C	YGL245W				YNL175C	YNL175C			YDR149C	YDR092W	YMR242C				YDL002C	YDL002C			YBR045C	YHR141C	YLR048W
	YBR221C	YIL119C				YGR202C	YHR215W			YHL050C	YLR038C	YML091C	YJL148W			YMR261C	YDR456W								YLR467C-A	YER074W	YIL078W				YOR198C	YOR198C			YDR199W	YLR162W	YGR214W				YFR032C-A	YOR078W			YBR056W	YPL106C	YLR167W
	YPR145W	YDR151C				YOR201C	YDR089W			YHR050W-A	YGL147C	YJR041C	YOR369C			YOR291W	YMR237W								YNL213C	YGL147C	YJL158C				YEL034C-A	YEL034C-A			YBR076C-A	YOR234C	YER117W				YOR078W	YHR088W			YBR063C	YBL027W	YGL189C
	YMR183C	YMR290C				YNL072W	YMR036C			YMR075C-A	YDR086C	YJL084C	YOL109W			YHR206W	YHR163W								YOL099C	YBR011C	YJR143C				YGR187C	YGR187C			YLR263W	YPR044C	YBR181C				YHR088W	YCR016W			YBR083W	YPL090C	YDR471W
	YJL076W	YPL137C				YOL141W	YCL063W			YDR379C-A	YER117W	YLR120C	YLR154W-C			YKL157W	YFL033C								YOR019W	YBL027W	YPL048W				YDL153C	YDL153C			YOL097W-A	YLR167W	YGR240C				YCR016W	YOR262W			YBR114W	YKR094C	YHR141C
	YDR213W	YLL041C				YPL265W	YDR445C			YLR294C	YOR052C	YJR091C	YDL067C			YJR127C	YOR273C								YOR396C-A	YHL033C	YCR012W				YHR170W	YHR170W			YKR075C	YLR325C	YMR205C				YER126C	YER126C			YBR133C	YHR064C	YDR172W
	YPR036W-A	YPR145W				YMR024W	YNL310C			YMR077C	YNL244C	YLR113W	YDL136W			YDL022W	YDR074W								YPL035C	YMR205C	YDL171C				YBR084C-A	YML026C			YOR304C-A	YBL092W	YEL046C				YOR262W	YER002W			YBR158W	YOL040C	YPL106C
	YKR099W	YGR061C				YGL071W	YLR061W			YDR042C	YOR293W	YBL101C	YER002W			YHR104W	YLR219W								YPL108W	YDL185W	YJR077C				YML026C	YNL308C			Q0070	YCR013C	YGR060W				YDR339C	YFR032C-A			YBR179C	YLR197W	YPL090C
	YPL249C-A	YBR221C				YGL216W	YOL005C			YDR183W	YLR167W	YFL041W	YFR032C-A			YJL076W	YLR399C								YCR007C	YGL245W	YGL022W				YNL308C	YBR084C-A			YAL063C	YPL198W	YOR270C				YER002W	YDR339C			YBR289W	YPL131W	YBL027W
	YOR188W	YJL076W				YBR269C	YGR202C			YNL133C	YJL148W	YDL224C	YLR062C			YER019W	YHR206W								YDL179W	YIL078W	YGL206C				YNL285W	YAL003W			YBR194W	YDR025W	YJR045C				YNL110C	YNL110C			YBR294W	YNL069C	YPL093W
	YAR002W	YPR036W-A				YBR065C	YOR201C			YBL107C	YOR369C	YAL036C	YMR294W-A			YDR044W	YNL139C								YDR149C	YGL008C	YJL034W				YAL003W	YNL285W			YDR022C	YGL147C	YER056C				YHR187W	YHR187W			YBR295W	YLR237W	YKR094C
	YDL040C	YMR183C				YHR018C	YPL265W			YDR163W	YOL109W	YHR030C	YGL102C			YDR141C	YOR291W								YDR199W	YCR012W	YDR188W				YBR247C	YBR247C			YER190W	YEL034C-A	YOR335C				YGR275W	YNR054C			YCL014W	YGR192C	YHR064C
	YGL035C	YDR213W				YHR192W	YNL072W			YIL086C	YBL036C	YDR122W	YOR234C			YJL121C	YJR127C								YDR253C	YJL158C	YBR286W				YJL148W	YJL148W			YFR046C	YML026C	YGL234W				YNR054C	YDL213C			YCR007C	YMR307W	YCR013C
	YOR092W	YKR099W				YLR356W	YOL141W			YMR040W	YLR154W-C	YLR023C	YFR001W			YCR067C	YMR261C								YER067W	YLR044C	YOR153W				YCR087W	YCR087W			YGL051W	YDL075W	YBR218C				YOR056C	YGR275W			YCR032W	YAL038W	YLR197W
	YAL003W	YPL249C-A				YOR156C	YMR024W			YDR078C	YDL067C	YMR054W	YJL189W			YNR031C	YKL157W								YIR019C	YJL034W	YGR060W				YDR002W	YDR002W			YJL225C	YDR471W	YBR286W				YDL213C	YLR051C			YCR038C	YJL130C	YOL040C
	YNL131W	YMR246W				YNL240C	YGL071W			YER180C	YLR051C	YPR138C	YJL188C			YBR218C	YDL022W								YPR142C	YJR077C	YGL008C				YGR118W	YGR118W			YJR004C	YDL136W	YDL145C				YLR051C	YOR056C			YCR073C	YGR279C	YDR025W
	YNL236W	YOR188W				YML091C	YBR065C			YGR182C	YDL136W	YDL052C	YOR277C			YAR042W	YJL076W								Q0120	YGL206C	YJL080C				YER019C-A	YER019C-A			YMR316C-A	YPR102C	YGL008C				YBL093C	YBL093C			YCR091W	YLR058C	YPL131W
	YOL130W	YAR002W				YLL041C	YGL216W			YOR193W	YER002W	YIL033C				YDR417C	YER019W								YGR179C	YGR060W	YAL023C				YKL143W	YKL143W			YOL029C	YLR029C	YDR238C				YBR084C-A	YKR081C			YDL033C	YHR179W	YNL069C
	YGL213C	YOR092W				YLL038C	YBR269C			YDR469W	YDR322C-A	YPL135W				YKL100C	YDR044W								YBR113W	YBR286W	YJR016C				YGR005C	YGR005C			YOL079W	YBR084C-A	YJR143C				YKR081C	YBR084C-A			YDL035C	YPR036W	YAL038W
	YGL216W	YDL040C				YPR036W-A	YHR018C			YLR327C	YFR032C-A	YIL005W				YCR093W	YHR104W								YBR194W	YJR016C	YEL031W				YLR325C	YJR072C			YOL157C	YAL003W	YDR188W				YOL077C	YOL077C			YDL077C	YOR063W	YMR307W
	YCL037C	YAL003W				YNL099C	YHR192W			YLR408C	YHR081W	YNL297C				YLR357W	YDR141C								YBR294W	YJL080C	YHR094C				YJR072C	YGR208W			YPL185W	YOR293W	YGL245W				YFR049W	YFR049W			YDL170W	YLR110C	YJL130C
	YJL042W	YGL035C				YPL135W	YLR356W			YPL035C	YLR062C	YFR024C-A				YBR115C	YJL121C								YDR278C	YEL031W	YLR390W-A				YNR054C	YKR047W			YFL062W	YCR031C	YCR053W				YLR449W	YLR449W			YDL248W	YGL008C	YGR279C
	YHR099W	YOL130W				YOR077W	YOR156C			YDR318W	YMR294W-A	YOR086C				YNL241C	YNR031C								YFR003C	YAL023C	YJL159W				YKR047W	YNR054C			YLR194C	YER074W	YDR341C				YDL121C	YDL121C			YDR009W	YER070W	YOR063W
	YHR155W	YNL236W				YEL053W-A	YNL240C			YER030W	YGR008C	YEL043W				YPL006W	YCR067C								YFR032C-B	YLR390W-A	YML085C				YGR208W	YGR145W			YBL113C	YBL027W	YLR413W				YLR025W	YIR004W			YDR027C	YBR031W	YHR179W
	YAL012W	YNL131W				YAL039C	YPR036W-A			YER186C	YLR262C-A	YAL029C				YDR122W	YBR218C								YGL029W	YNR016C	YLR044C				YKR014C	YLR325C			YDR014W-A	YJR145C	YCR012W				YIR004W	YLR025W			YDR058C	YDL229W	YLR110C
	YLR455W	YGL213C				YKL019W	YLL038C			YIL030W-A	YGL102C	YKL175W				YBR059C	YDR417C								YGL090W	YDR127W	YNR016C				YGR145W	YKR014C			YGL183C	YHL015W	YHR094C				YLR221C	YLR221C			YDR061W	YHR174W	YPR036W
	YBR055C	YCL037C				YKR099W	YPL135W			YKL026C	YOR234C	YDR326C				YPL231W	YOR178C								YGL108C	YLR342W	YMR143W				YNL036W	YNL244C			YHL050C	YBL072C	YML008C				YOR194C	YOR194C			YDR065W	YKR042W	YGL008C
	YBR133C	YGL216W				YNL073W	YML091C			YDR381C-A	YHR138C	YPL023C				YLL028W	YCR093W								YGR018C	YPR159W	YDR127W				YNL244C	YNL036W			YPR050C	YML024W	YDR483W				YDR056C	YDR056C			YDR082W	YMR305C	YER070W
	YBR238C	YBR238C				YGL236C	YNL099C			YKL076C	YFR001W	YLR436C				YBR212W	YLR357W								YGR154C	YJR121W	YPL028W				YPR187W	YKL013C			YOR146W	YPL090C	YLR372W				YKL089W	YPL146C			YDR133C	YPR080W	YKL029C
	YOL126C	YJL042W				YNR046W	YLL041C			YCR018C-A	YJL189W	YDR430C				YLR438W	YKL100C								YHR219W	YGL137W	YPR159W				YNL061W	YPR102C			Q0120	YMR142C	YBL099W				YPL146C	YLR052W			YDR149C	YJL079C	YBR031W
	YOR201C	YOL126C				YCR059C	YOR077W			YDR383C	YJL188C	YGR130C				YOR178C	YAR042W								YJL189W	YLR027C	YJR121W				YKL013C	YPR187W			YCL022C	YML073C	YGR204W				YDR087C	YDR087C			YDR160W	YJL158C	YHR174W
	YHR206W	YHR155W				YGR197C	YEL053W-A			YER137C	YOR277C	YDR143C				YJL172W	YBR115C								YKL118W	YGR138C	YGL137W				YPR102C	YNL061W			YLR269C	YDR382W	YPR041W				YLR052W	YKL089W			YDR171W		YLR390W-A
	YDR044W	YHR099W				YFR029W	YKR099W			YJL049W	YEL053W-A	YLR096W				YPR091C	YDR122W								YLR263W	YIL123W	YLR342W				YOL058W	YNL232W			YMR107W	YBR181C	YGR218W				YPR062W	YJL125C			YDR185C		YDL229W
	YNL099C	YAL012W				YGL062W	YAL039C			YJL188C	YLR286C	YHL034C				YJL042W	YNL241C								YLR275W	YDL195W	YKL163W				YNL232W	YOL058W			YNL331C	YER117W	YJL130C				YJL189W	YPR062W			YDR216W		YKR042W
	YJL168C	YBR055C				YPR106W	YGL062W			YJR011C	YNL066W	YER176W				YNL049C	YPL231W								YLR282C	YLR154W-B	YLR027C				YKL009W	YKL009W			YFR026C	YOR063W	YOR151C				YJL125C	YJL189W			YDR227W		YPR080W
	YBL024W	YBR133C				YBR130C	YGL236C			YLR068W	YHR099W	YKL204W				YLR256W	YLL028W								YLR411W	YGL026C	YPL154C				YPR036W-A	YAR002C-A			YHR152W	YGR061C	YEL042W				YIL019W	YIL019W			YDR249C		YLR044C
	YDR422C	YHR206W				YOL019W	YKL019W			YLR284C	YKL212W	YOR299W				YBL105C	YBR059C								YNR025C	YDL022W	YIL123W				YAR002C-A	YDL100C			YLR411W	YGR240C	YMR012W				YKR085C	YKR085C			YDR270W		YMR305C
	YGL222C	YLR455W				YNR018W	YNR046W			YNL114C	YML072C	YBR074W				YBR208C	YPL006W								YNR056C	YKL210W	YGR138C				YDL061C	YPR036W-A			YLR458W	YMR205C	YJR016C				YDR363W-A	YDR363W-A			YDR277C		YJL079C
	YHR023W	YOR201C				YLR393W	YNL073W			YOR366W	YOR128C	YKR082W				YDR127W	YBR212W								YOL091W	YDL140C	YDL195W				YDL100C	YDL061C			YMR085W	YLR044C	YJR077C				YGL058W	YGL058W			YDR291W		YJL158C
	YKL028W	YDR044W				YDR462W	YCR059C			YCL056C	YLR256W	YPL084W				YKL203C	YPR091C								YOR058C	YEL032W	YDL022W				YLR029C	YLR029C			YPL035C	YGL008C	YGR138C				YMR123W	YMR123W			YDR295C
	YKR096W	YJL168C				YOR017W	YGR197C			YER142C	YMR120C	YEL015W				YLR180W	YJL042W								YOR309C	YJL079C	YGL026C				YGR253C	YGR253C			YPR078C	YGR060W	YIL078W				YBR058C-A	YER019C-A			YDR314C
	YHR031C	YBL024W				YAL003W	YFR029W			YGR129W	YJL042W	YFR037C				YGR032W	YLR256W								YGL154C	YER070W	YDL140C				YOR344C	YOR344C			YBR298C	YOR270C	YPL048W				YER019C-A	YDL155W			YDR332W
	YPL057C	YNL099C				YPR138C	YNR018W			YGR240C-A	YER091C	YDR349C				YMR024W	YBL105C								YKL188C	YDL095W	YKL210W				YDL208W	YCL054W			YDL039C	YJR045C	YJL034W				YDL155W	YBR058C-A			YDR334W
	YNL017C	YDR422C				YBL085W	YBR130C			YML002W	YIL155C	YMR165C				YPL092W	YNL049C								YJR071W	YEL047C	YJL079C				YOL041C	YDL208W			YDR029W	YOR335C	YAL023C				YDR083W	YDR083W			YDR380W
	YJR014W	YKL028W				YJL063C	YOL019W			YOR199W	YLL040C	YHR107C				YAL021C	YLR438W								YJR034W	YLL048C	YER070W				YOR004W	YOL041C			YNR068C	YGL234W	YDL185W				YER006W	YDR116C			YDR383C
	YJR148W	YKR096W				YOR188W	YPR106W			YPL186C	YPL058C	YDL102W				YOR098C	YBR208C								YBL106C	YCL040W	YEL032W				YER048C	YOR004W			YPL056C	YCR012W	YLR027C				YNL002C	YNL002C			YDR386W
	YHR082C	YJR148W				YNL053W	YDR462W			YGL109W	YLR305C	YGR173W				YAL017W	YJL172W								YKR075C	YDR011W	YDL095W				YNR050C	YER048C			YPR007C	YDL145C	YPR159W				YDR116C	YNL232W			YDR406W
	YPR008W	YHR031C				YPL155C	YAL003W			YGR042W	YDR135C	YLR069C				YAL040C	YLR180W								YNL144C	YMR015C	YIR006C				YGL078C	YGL078C			YPR167C	YBR286W	YLR410W				YNL232W	YER006W			YDR437W
	YKR001C	YJR014W				YGR204W	YLR393W			YER087C-A	YGR204W	YOR081C				YDR457W	YKL203C								YGL061C	YMR297W	YLR154W-B				YCL054W	YGR148C			YGR018C	YGL245W	YNL085W				YHR170W	YHR170W			YDR506C
	YGL197W	YGL222C				YLR450W	YOR017W			YLR265C	YOL004W	YPR019W				YJL141C	YDR127W								YCL058C	YLR304C	YFR051C				YGR148C	YNR050C			YDR273W	YCR053W	YOR153W				YFR033C	YNL292W			YDR523C
	YPL231W	YHR023W				YGL035C	YPR138C			YIR005W	YIL047C	YOR330C				YLR413W	YOR098C								YCR014C	YGL173C	YML070W				YCR005C	YCR005C			YDL158C	YLR413W	YMR173W-A				YNL292W	YDL148C			YDR527W
	YJL130C	YNL017C				YGL039W	YGL039W			YJR067C	YJR109C	YPR008W				YIL056W	YAL021C								YDL239C	YGL012W	YMR079W				YOR272W	YOR272W			YDL243C	YDR341C	YKL182W				YDL148C	YBR279W			YEL062W
	YPL183W-A	YPL057C				YOL130W	YOR188W			YDL239C	YBL007C	YLR286C				YPL137C	YMR024W								YPR145C-A	YJL002C	YCR017C				YDR346C	YDR346C			YER067W	YML008C	YGR254W				YBR279W	YFR033C			YEL069C
	YCR033W	YHR082C				YCL014W	YNL053W			YGL214W	YDR011W	YOR374W				YLR419W	YGR032W								YBR045C	YKL157W	YKR093W				YER127W	YER127W			YDL179W	YJL130C	YGL022W				YLR276C	YLR276C			YEL070W
	YNR018W	YPR008W				YGL213C	YJL063C			YGR271C-A	YBR039W	YJL078C				YJL212C	YPL092W								YCR101C	YER088C	YLL048C				YIL118W	YIL118W			YHR219W	YPR041W	YBR084W				YPR188C	YJL148W			YEL072W
	YOR047C	YJL130C				YOL027C	YOL130W			YHL012W	YGL173C	YML072C				YIL155C	YAL040C								YKL161C	YLR378C	YLR438W				YGR245C	YGR245C			YLL047W	YBL099W	YGR178C				YJL148W	YHR066W			YEL076C
	YDR143C	YPL231W				YOL073C	YLR450W			YPL034W	YKL157W	YNL066W				YOR109W	YJL141C								YDR383C	YJL172W	YML075C				YDR361C	YGL244W			YML057C-A	YJR016C	YCR093W				YML074C	YPR188C			YEL077C
	YLR439W	YGL197W				YLL027W	YPL155C			YDR275W	YMR008C	YLL040C				YDR143C	YDR457W								YML119W	YHR039C	YCL040W				YGL244W	YOR234C			YOR008C-A	YGR218W	YBR283C				YOL058W	YBL054W			YER024W
	YDR226W	YNR018W				YJL065C	YGL213C			YPL080C	YPL085W	YHR099W				YFR024C-A	YAL017W								YBR278W	YIL109C	YML100W				YOR234C	YCL050C			YOR218C	YOR151C	YEL031W				YHR066W	YOL058W			YER033C
	YNL137C	YKR001C				YPL104W	YBL085W			YEL012W	YKL148C	YOL004W				YLR203C	YPL137C								YER030W	YLR256W	YEL047C				YCL050C	YDR361C			YCR089W	YKL182W	YGR155W				YBL054W	YML074C			YER039C
	YJR137C	YPL183W-A				YPL057C	YGL035C			YDL172C	YDR497C	YBL007C				YJR091C	YLR413W								Q0055	YDR432W	YFL037W				YMR295C	YMR295C			YJL213W	YMR012W	YOR116C				YGR253C	YER127W			YER040W
	YJR111C	YOL070C				YOR202W	YCL014W			YDR008C	YIL022W	YKL157W				YER119C	YIL056W								YAL027W	YIL039W	YLR304C				YPL265W	YPL265W			YLL057C	YIL078W	YGR264C				YER127W	YDR312W			YER054C
	YPL212C	YCR033W				YHL031C	YGR204W			YIL098C	YER017C	YLR256W				YJR121W	YLR419W								YDR121W	YBL007C	YGL012W				YKR025W	YDR152W			YBR050C	YPL048W	YDR345C				YMR197C	YGR253C			YER060W
	YLR260W	YOR047C				YGL064C	YOL027C			YLR346C	YLR438W	YMR120C				YPR138C	YOR109W								YDR273W	YMR008C	YHR026W				YDR152W	YKR025W			YGR050C	YJL034W	YDL095W				YDR312W	YMR197C			YER071C
	YER183C	YPL212C				YLR185W	YKL148C			YJR155W	YGL197W	YER091C				YDR028C	YDR143C								YDR318W	YIL047C	YHR042W				YPL093W	YPL093W			YNL188W	YDL185W	YJL109C				YJR087W	YLR435W			YER093C
	YMR165C	YJR111C				YOR272W	YLL027W			YIL008W	YOR230W	YLR450W				YDR283C	YMR315W								YHL019W-A	YMR196W	YMR015C				YDR299W	YMR183C			YKL123W	YPR159W	YMR250W				YPR141C	YKL009W			YER115C
	YLR419W	YJR137C				YPL137C	YOL073C			YML062C	YPL249C-A	YLR304C				YBL099W	YIL155C								YKR053C	YKL212W	YDR011W				YNL096C	YPR163C			YOL015W	YJR077C	YDL022W				YDR365C	YNL227C			YER145C-A
	YEL015W	YDR143C				YKL062W	YJL065C			YBR045C	YKL185W	YGR204W				YOR299W	YLR203C								YLR194C	YGL195W	YOL004W				YPR163C	YDR299W			YOR100C	YAL023C	YEL032W				YKL009W	YGL222C			YER152C
	YLL044W	YNL137C				YNL236W	YPL057C			YGL041C-B	YBR080C	YBR238C				YIR006C	YJL212C								YLR218C	YOR374W	YDR119W				YMR183C	YNL162W			YJL037W	YGL022W	YLR106C				YEL034C-A	YOR276W			YER175C
	YJL054W	YLR419W				YGL222C	YPL104W			YDR424C	YLR378C	YBR092C				YOR128C	YGR014W								YLR298C	YDR135C	YNL160W				YNL162W	YNL096C			YIL071W-A	YOR153W	YMR318C				YLR435W	YER131W			YER180C
	YOR191W	YDR226W				YHR036W	YOR272W			YLR036C	YAL021C	YDR093W				YJL101C	YFR024C-A								YLR358C	YOR317W	YLL040C				YJR014W	YJR014W			YIL164C	YBR084W	YOR168W				YOR272W	YOR272W			YER186C
	YNL310C	YMR165C				YDL202W	YPL137C			YGL230C	YLR450W	YDR011W				YKL182W	YJR091C								YNL058C	YDL222C	YMR297W				YDR060W	YER056C-A			YDL177C	YBR283C	YJL171C				YNL227C	YPL170W			YFL036W
	YOL005C	YLR439W				YBR193C	YOR202W			YJR022W	YIR006C	YIL126W				YLR133W	YDR283C								YNL331C	YBR126C	YGL173C				YER056C-A	YDR060W			YIL169C	YEL031W	YLR342W				YGL222C	YNL099C			YFR019W
	YDR510W	YLR260W				YOR128C	YGL064C			YNL228W	YAR015W	YGL173C				YER166W	YKL182W								YOR318C	YER011W	YLR378C				YMR033W	YMR033W			YDL185C-A	YCR093W	YER070W				YPL170W	YDR365C			YFR022W
	YMR319C	YJL054W				YLR260W	YHL031C			YPL071C	YLR071C	YLR438W				YLR389C	YJR121W								YAL063C	YGL156W	YJL002C				YLR175W	YLR175W			YDR162C	YER070W	YJL079C				YER131W	YDR408C			YGL045W
	YJL053W	YEL015W				YBR105C	YLR185W			YCL058C	YLR259C	YCR034W				YDR150W	YOR299W								YER137C	YDL223C	YIL109C				YBL092W	YER146W			YER088C-A	YGR155W	YJL039C				YOR276W	YEL034C-A			YGL080W
	YGL127C	YLL044W				YKL028W	YKL062W			YJR082C	YBR238C	YOR230W				YKL185W	YJL101C								YFR001W		YJL041W				YER146W	YBL092W			YFL050C	YGR264C	YOR099W				YNL099C	YAL013W			YGL096W
	YIL041W	YER183C				YKL012W	YNL236W			YJL189W	YJL076W	YOR109W				YER069W	YER119C								YLR341W		YGL040C				YER133W	YER133W			YGR224W	YDL095W	YGL092W				YDR408C	YOR306C			YGL131C
	YBR114W	YMR319C				YFR034C	YGL222C			YPL238C	YDR093W	YER105C				YMR109W	YKL109W								YKL123W		YJL172W				YJR069C	YJR069C			YHL019W-A	YDR345C	YPL085W				YAL013W	YKR097W			YGL134W
	YIL079C	YOR191W				YPR124W	YHR036W			YBR285W	YIL109C	YAR015W				YHR165C	YDR028C								YER158W-A		YDR432W				YER100W	YER100W			YKL076C	YLR106C	YOR323C				YOR306C	YPR141C			YGL165C
	YPL226W	YOL005C				YDR044W	YDL202W			YDR068W	YML031W	YNL139C				YLR259C	YPR138C								YNL046W		YLR256W				YPR035W	YGR085C			YOL047C	YJL109C	YGL137W				YPL043W	YPL043W			YGL216W
	YNL287W	YNL310C				YGR049W	YBR105C			YJR087W	YPR024W	YPL085W				YOR140W	YLR133W								YOR135C		YGL195W				YGR085C	YPR035W			YMR294W	YDL022W	YDL171C				YPL213W	YPL213W			YGR002C
	YLR185W	YBR114W				YDR491C	YKL028W			YDL085C-A	YJR127C	YLR357W				YDR111C	YIR006C								YPR158W		YML072C				YJL125C	YNL229C			YDL041W	YOR168W	YCR017C				YLR162W	YKR025W			YGR070W
	YIL126W	YPL226W				YOL089C	YKL012W			YAR053W	YIL126W	YBR112C				YIL121W	YBL099W								YBR098W		YKR066C				YNL229C	YJL125C			YDR042C	YOR099W	YDR001C				YLR388W	YGR152C			YGR088W
	YKL032C	YIL079C				YBR055C	YLR260W			YDR241W	YBR086C	YIL137C				YGR184C	YER166W								YEL023C		YAL053W				YOR206W	YOR206W			YEL067C	YPL085W	YHR098C				YKR097W	YLR162W			YGR110W
	YPR070W	YIL041W				YMR287C	YBR193C			YDR473C	YDR457W	YIR006C				YGR061C	YOR128C								YNL228W		YNL262W				YBL054W	YCR035C			YEL074W	YJL079C	YLR028C				YEL051W	YEL051W			YGR150C
	YPL085W	YGL127C				YDR527W	YFR034C			YER088C-A	YPL137C	YCL025C				YMR272C	YLR389C								YBR277C		YCR034W				YJL033W	YJL033W			YKL118W	YLR342W	YPL154C				YGR152C	YLR181C			YGR179C
	YMR146C	YDR510W				YJR113C	YPR124W			YIR024C	YNL241C	YAL021C				YOR188W	YER069W								YJL170C		YKR013W				YCR035C	YBL054W			YLR218C	YDR457W	YPL231W				YKR025W	YNL050C			YGR270W
	YNL299W	YJL053W				YIL044C	YDR044W			YLR456W	YDR028C	YIL115C				YHR216W	YHR165C								YPR150W		YKL157W				YPR137W	YPR137W			YML083C	YPL231W	YDR457W				YLR181C	YLR388W			YHL012W
	YLR172C	YLR185W				YER183C	YGR049W			YLR361C-A	YCR067C	YLR378C				YLR179C	YLR130C								YDR259C		YER088C				YLR002C	YER055C			YPL205C	YGL137W	YPR069C				YDL161W	YDR152W			YHL032C
	YIR023W	YPR070W				YPR065W	YOR128C			YPL147W	YCR034W	YBL105C				YBR205W	YDR150W								YGR044C		YER011W				YKL196C	YKL196C			YLR343W	YDL171C	YJL080C				YNL050C	YDL161W			YHL035C
	YLR399C	YKL032C				YBR261C	YDR491C			YLR080W	YLR399C	YOR317W				YDR293C	YOR140W								YHL006W-A		YIL039W				YER055C	YLR002C			YBL048W	YFL037W	YMR143W				YOR238W	YOR238W			YHL047C
	YPL092W	YMR146C				YEL015W	YOL089C			YDL200C	YBR263W	YPL082C				YBR140C	YDR111C								YHR050W-A		YBL007C				YMR146C	YMR142C			YCR007C	YPL028W	YOR230W				YMR039C	YMR039C			YHL050C
	YMR006C	YIL126W				YMR268C	YBR055C			YKL011C	YOR323C	YAL053W				YPL262W	YKL185W								YMR003W		YMR196W				YMR142C	YMR146C			YDR281C	YCL040W	YPL028W				YOR252W	YGR246C			YHR048W
	YBR028C	YNL299W				YDR054C	YMR287C			YGR035C	YOR109W	YLR259C				YER017C	YMR109W								Q0110		YOR374W				YNL035C	YNL035C			YGL108C	YLR354C	YFL037W				YAL003W	YOR252W			YHR054C
	YJL026W	YLR172C				YBR028C	YDR527W			YKL061W	YER105C	YAL043C				YDL224C	YGR184C								YBR224W		YOR317W				YGR180C	YGR180C			YOR177C	YJL080C	YGL012W				YGR246C	YLR455W			YHR073W
	YDL182W	YNL287W				YDR246W	YJR113C			YMR052C-A	YBR115C	YER088C				YDR347W	YIL121W								YDR179C		YAL005C				YMR260C	YMR260C			YPR002W	YGL207W	YFR051C				YDR152W	YGR145W			YHR092C
	YAR002C-A	YIR023W				YCR046C	YIL044C			YBR258C	YNL139C	YNL239W				YBR080C	YHR216W								YDR532C		YDL223C				YJR002W	YJR002W			YML119W	YGL012W	YOR291W				YGR145W	YDR494W			YHR102W
	YIL149C	YPL085W				YDR143C	YBR261C			YHR081W	YLR410W	YJL041W				YMR171C	YOR188W								YER145C-A		YDL052C				YOR232W	YOR232W			YMR159C	YML075C	YER090W				YLR455W	YBR247C			YHR124W
	YOR140W	YDL182W				YOR163W	YPR065W			YIL139C	YHR098C	YOL098C				YCL009C	YLR179C								YGL188C-A		YPR024W				YBR142W	YLR197W			YAR053W	YIR006C	YGL206C				YDR494W	YAL003W			YHR137W
	YOR340C	YMR006C				YJL076W	YER183C			YIL161W	YNL236W	YHR165C				YIL048W	YMR272C								YGR025W		YNL241C				YOR226C	YOR123C			YPL064C	YHR026W	YLR354C				YML026C	YLR003C			YHR171W
	YOR272W	YOR272W				YCL037C	YMR268C			YDR522C	YKL032C	YLR058C				YDR430C	YGR061C								YGR053C		YER023W				YLR197W	YBR142W			YDL154W	YDR074W	YGL207W				YBR247C	YML026C			YHR204W
	YNR006W	YBR028C				YBR016W	YEL015W			YCR018C	YKL038W	YJL076W				YNL240C	YLR259C								YHL030W-A		YDL103C				YOR123C	YOR226C			YMR075C-A	YER011W	YCL040W				YKL041W	YER030W			YIL013C
	YMR109W	YLR399C				YER018C	YBR028C			YLR423C	YER023W	YPL137C				YOL130W	YBR140C								YHL042W		YFR037C				YPL181W	YNL231C			YNL046W	YMR015C	YML056C				YLR003C	YPR187W			YIL017C
	YGL003C	YOR340C				YKL032C	YDR054C			YMR284W	YLL028W	YOL051W				YDR433W	YMR171C								YOL023W		YPL240C				YPR169W	YPL181W			YML002W	YGL206C	YDL140C				YER030W	YKL041W			YIL031W
	YHL008C	YIL149C				YMR123W	YDR143C			YOR215C	YOR171C	YPL231W				YLR099C	YPL262W								YOL029C		YOR187W				YPL050C	YPL050C			YBR294W	YHR099W	YLR083C				YPR187W	YGR005C			YIL045W
	YOR226C	YJL026W				YGL058W	YDR246W			YDR336W	YIL137C	YIL109C				YDL145C	YBR205W								YPR167C		YBR074W				YNL231C	YPR169W			YER106W	YDL140C	YBR263W				YGR005C	YNL175C			YIL048W
	YKL192C	YNR006W				YOL070C	YCL037C			YLR165C	YJL005W	YBR263W				YHR098C	YDR293C								YAL026C-A		YMR278W				YER122C	YER122C			YKR105C	YNR016C	YGL026C				YNL175C	YPR065W			YIL092W
	YJL082W	YPL092W				YDR441C	YBR016W			YNL109W	YPR145W	YHR098C				YKR089C	YCR012W								YCR089W		YOR086C				YNL180C	YNL180C			YJL170C	YDR127W	YER011W				YLR154W-C	YLR154W-C			YIL151C
	YOR230W	YOR140W				YGR031W	YMR123W			YNL162W-A	YBR126C	YER172C				YIL125W	YOL130W								YDL041W		YHL030W				YML130C	YML130C			YNL144C	YOL004W	YDR127W				YPR065W	YDR184C			YIL159W
	YOL027C	YAR002C-A				YMR190C	YOR163W			YPL056C	YLR357W	YOR323C				YIL119C	YER017C								YDR067C		YIL033C				YDR471W	YGL189C			YBR124W	YHR042W	YNR016C				YML015C	YNR050C			YIL166C
	YBR261C	YMR109W				YOR035C	YKL032C			YAL037W	YKL184W	YBR115C				YGL126W	YJL016W								YDR119W-A		YPL023C				YGL189C	YDR471W			YCL058C	YMR297W	YMR015C				YDR184C	YML015C			YIL173W
	YNL167C	YOR226C				YMR064W	YJL076W			YLR227C	YBR112C	YKR093W				YIL129C	YDR347W								YDR363W		YGR052W				YMR197C	YMR197C			YAL016C-A	YKL210W	YHR042W				YBR089C-A	YPL181W			YIR010W
	YHR108W	YHL008C				YIR023W	YGL058W			YPL130W	YKR093W	YDR457W				YLR069C	YNL240C								YGL174W		YBR234C				YFL005W	YFL005W			YAL055W	YML070W	YML075C				YPL181W	YPR036W-A			YIR031C
	YHR192W	YGL003C				YGR140W	YER018C			YDR374W-A	YGL195W	YLR180W				YLR410W	YDL224C								YGR115C		YIL022W				YDR225W	YDR372C			YKR102W	YMR145C	YKR013W				YPR036W-A	YBR089C-A			YJL005W
	YDR028C	YJL082W				YNL152W	YDR441C			YER002W	YDR216W	YLR410W				YOR042W	YDR433W								YGR169C-A		YJR109C				YDR372C	YDR225W			YLR030W	YLR259C	YKL210W				YPL249C-A	YPL249C-A			YJL019W
	YBR246W	YBR261C				YKL038W	YCR046C			YGR161W-C	YNL118C	YBL099W				YLR071C	YLR099C								YHR004C		YOL129W				YGR079W	YGR135W			YNR002C	YEL047C	YIR006C				YCR035C	YCR035C			YJL023C
	YPL259C	YOL027C				YDL061C	YMR190C			YMR151W	YLL013C	YPR145W				YBR028C	YCL009C								YJL209W		YPR184W				YPL026C	YPL026C			YPL201C	YER088C	YHR026W				YDR225W	YGR271C-A			YJL053W
	YPL032C	YKL192C				YHR031C	YGR031W			YBR257W	YCL025C	YLR429W				YDL171C	YBR080C								YJR021C		YOR356W				YOR051C	YGR079W			YPR121W	YJL002C	YJR121W				YPR125W	YPR125W			YJL056C
	YJR007W	YBR246W				YBR221C	YOR035C			YJR135W-A	YCR093W	YDR044W				YNL201C	YIL048W								YKL083W		YOL155C				YOR260W	YOR260W			YDR383C	YDL195W	YDR074W				YIL138C	YKL120W			YJL083W
	YOR299W	YHR192W				YFR021W	YOL070C			YLR051C	YLR094C	YBR221C				YLR436C	YDR430C								YKR040C		YBR086C				YGR135W	YOR051C			YER180C	YJL041W	YHR099W				YOR244W	YLR018C			YJL090C
	YER164W	YJR007W				YJL062W-A	YIR023W			YER046W	YGL140C	YGL195W				YDR206W	YKR089C								YKR058W		YNL045W				YHR197W	YNL075W			YMR052C-A	YMR079W	YDR119W				YGR271C-A	YOR244W			YJL100W
	YDR291W	YOR230W				YLR014C	YMR064W			YER107W-A	YLR248W	YGL137W				YLR187W	YHR098C								YLR269C		YLR305C				YHR169W	YHR197W			YNL226W	YOL098C	YDL195W				YLR018C	YIL138C			YJL107C
	YLL036C	YHR108W				YER132C	YGR140W			YBR058C-A	YMR237W	YDL171C				YLR398C	YDL145C								YML002W		YDL015C				YNL075W	YHR169W			Q0055	YNL262W	YGL040C				YKL120W	YNR003C			YJL129C
	YOR163W	YDR028C				YHR206W	YNL152W			YOR265W	YBR059C	YJR007W				YHR113W	YIL119C								YML098W		YNR017W				YPL057C	YPL057C			YBR180W	YJL172W	YHR137W				YNR003C	YDR225W			YJL139C
	YGL049C	YNL167C				YPL103C	YKL038W			YFL062W	YIL115C	YFR051C				YDL229W	YIL125W								YMR075C-A		YIR038C				YHR063W-A	YHR063W-A			YER137C	YOR109W	YLR259C				YER146W	YER146W			YJL164C
	YMR162C	YOR299W				YBL032W	YHR206W			YLR251W	YBL105C	YLR106C				YAL043C	YLR069C								YMR159C		YLL028W				YJL190C	YJL190C			YPL108W	YML100W	YMR145C				YOR004W	YOR004W			YJL222W
	YOL078W	YLL036C				YJL168C	YHR031C			YBR111W-A	YLR403W	YCR093W				YLL031C	YLR410W								YNL226W		YIL101C				YJL078C	YLL011W			YBL071C	YKR093W	YDR039C				YDL092W	YDL092W			YJL225C
	YFL004W	YER164W				YDR121W	YDL061C			YLR171W	YCL037C	YER166W				YKL068W	YGL126W								YOL015W		YIL108W				YLL011W	YLL008W			YIL082W	YMR196W	YAL026C				YMR194W	YOL101C			YJR054W
	YGR049W	YPL019C				YHR099W	YLR014C			YJL106W	YGL137W	YLR413W				YIL109C	YIL129C								YOL108C		YDR497C				YLL008W	YMR242C			YDL245C	YGR199W	YER105C				YNL180C	YNL180C			YJR061W
	YPL019C	YPL032C				YPR008W	YFR021W			YBR063C	YDL171C	YMR145C				YIL115C	YLR071C								YOL109W		YLR120C				YLR388W	YLR388W			YBR224W	YDL015C	YKL068W				YOL101C	YGL169W			YJR071W
	YER167W	YPL259C				YHR102W	YER132C			YEL023C	YLR106C	YLR061W				YER169W	YOR042W								YOL134C		YJR001W				YDL051W	YDL051W			YJR107W	YIL109C	YMR297W				YGL169W	YMR194W			YJR106W
	YNL053W	YCL025C				YHR070W	YBR221C			YKL123W	YMR246W	YEL032W				YOR092W	YBR028C								YPL064C		YAL036C				YMR242C	YFL038C			YOR282W	YLR256W	YKL203C				YGR103W	YMR239C			YJR107W
	YGL094C	YGR049W				YBL014C	YJL168C			YOL108C	YNL197C	YJL121C				YBL047C	YNL201C								YPR030W		YBR036C				YFL038C	YJL078C			YDR119W-A	YDR011W	YER021W				YBR290W	YKL099C			YJR129C
	YJR140C	YOL078W				YLL036C	YPR008W			YBR211C	YBR221C	YJL130C				YNL297C	YDR038C								YIL166C		YHR039C				YDR177W	YGL011C			YFR003C	YIL039W	YDR093W				YMR239C	YBR290W			YJR147W
	YOL073C	YOR163W				YLR154W-E	YJL062W-A			YLR145W	YMR145C	YCL037C				YDL086W	YLR436C								YKR105C		YMR008C				YGL011C	YDR177W			YJL214W	YLL026W	YIL137C				YDR391C	YGR103W			YKL050C
	YML106W	YDR291W				YCL029C	YHR070W			YOR365C	YPL082C	YJL080C				YIL047C	YDR206W								YPR025C		YIL047C				YMR002W	YBR082C			YJR034W	YLL048C	YHR165C				YKL099C	YDR391C			YKL109W
	YNL183C	YFL004W				YJR060W	YDR121W			YDR523C	YAL053W	YJR121W				YPL016W	YLR187W								YBL028C		YIL155C				YBR082C	YMR002W			YLR205C	YLR304C	YCL057W				YGR208W	YGR208W			YKL168C
	YPR072W	YGL049C				YGL003C	YBL014C			YKR061W	YJL130C	YFL004W				YFL007W	YDL229W								YBL086C		YKL212W				YDL074C	YML093W			YLR282C	YMR008C	YGL099W				YIL118W	YIL118W			YKL171W
	YNL005C	YNL053W				YDL207W	YHR102W			YDR540C	YOR317W	YNR016C				YBL017C	YHR113W								YBR122C		YDR135C				YOL027C	YOL027C			YOR189W	YGL167C	YML070W				YNL308C	YNL308C			YKL215C
	YGL011C	YOL073C				YJR014W	YLR154W-E			YBR233W-A	YJL084C	YDL195W				YHR205W	YDL171C								YDL151C		YDL222C				YMR290C	YML106W			YPL071C	YDL223C	YKL165C				YMR161W	YCR005C			YKL217W
	YOR035C	YMR162C				YBR039W	YPL103C			YDR286C	YLR413W	YDR174W				YJR117W	YLR398C								YDR223W		YBR126C				YAL035W	YDL074C			YPL147W	YML072C	YAL053W				YOL027C	YMR161W			YKR019C
	YJR060W	YGL094C				YOR233W	YDL123W			YGR018C	YGR211W	YDR417C				YFR034C	YER169W								YDR313C		YGL156W				YML106W	YDL147W			Q0110	YIL047C	YIL109C				YOR234C	YOL027C			YKR021W
	YMR021C	YPR072W				YBL066C	YCL029C			YJL148W	YJL121C	YDR150W				YNL271C	YOR092W								YFL012W-A						YDL147W	YAL035W			YER024W	YKL157W	YJL002C				YCR005C	YOR234C			YKR050W
	YDL207W	YGL011C				YDR151C	YLL036C			YKL136W	YLR120C	YGR032W				YBL007C	YKL068W								YHR211W						YML093W	YMR123W			YDL079C	YHR039C	YEL047C				YLR325C	YDR468C			YKR054C
	YDR166C	YJR140C				YMR021C	YHR099W			YBL094C	YAL043C	YJL109C				YGL213C	YAL043C								YJL214W						YMR123W	YMR290C			YGL090W	YIL155C	YMR079W				YDR468C	YLR407W			YKR058W
	YGL178W	YER167W				YBL024W	YBL032W			YJR141W	YER088C	YLR354C				YBL022C	YFL007W								YKL061W						YOL010W	YDL075W			YGR228W	YBL007C	YNL160W				YGR085C	YGR085C			YKR086W
	YLR071C	YML106W				YHR062C	YJR014W			YDR079W	YNL239W	YDR127W				YLR403W	YHR205W								YML095C						YER102W	YOL010W			YHR211W	YGL173C	YKR066C				YHR018C	YMR295C			YKR096W
	YJR103W	YNL183C				YDR240C	YDL207W			YCR007C	YNL104C	YMR246W				YNL221C	YLL031C								YMR052C-A						YDL075W	YER102W			YKR050W	YBR126C	YPR160W				YPR102C	YIL050W			YKR103W
	YBR081C	YNL005C				YNL131W	YGL003C			YDR179C	YML091C	YDL040C				YKR046C	YIL115C								YMR316C-A						YPR112C	YPR112C			YDL118W	YPL240C	YLR378C				YMR295C	YHL013C			YKR105C
	YHR102W	YDL207W				YDR040C	YJR060W			YGR154C	YEL032W	YGR178C				YPL032C	YIL109C								YNR072W						YOR119C	YPL243W			YMR206W	YOR374W	YJL172W				YLR407W	YPR102C			YLL003W
	YNL139C	YGL178W				YML076C	YOR233W			YOL157C	YJL080C	YBR218C				YOR290C	YIL047C								YPL182C						YPL243W	YOR119C			YLL009C	YGL195W	YLR304C				YHL013C	YJL140W			YLL054C
	YER132C	YJR103W				YAR002W	YDR151C			YKR020W	YOL098C	YLL048C				YPR036W	YBL047C								YPR136C						YDL122W	YDL122W			YIR028W	YGL156W	YKL046C				YIL050W	YKL075C			YLL058W
	YLR019W	YOR035C				YKR007W	YBR039W			YIL164C	YJL041W	YNL104C				YMR165C	YDL086W								YPR143W						YPR060C	YKL040C			YDL218W	YKL212W	YML100W				YJL140W	YHR018C			YLR067C
	YJL044C	YLR071C				YCR068W	YHR062C			YOL035C	YJR091C	YGR061C				YHR073W	YGL213C								YPR151C						YNR003C	YPR060C			YLR198C	YDR135C	YLL048C				YKL075C	YLR325C			YLR087C
	YOL089C	YJR060W				YHR182W	YBL024W			YGL033W	YJL109C	YPL226W				YNR016C	YNL297C								YGR050C						YKL040C	YPR062W			YNL213C	YNL339C	YKR093W				YLR029C	YGR118W			YLR108C
	YGR208W	YHR102W				YBL103C	YBL066C			YDL158C	YHR165C	YKL182W				YKL212W	YFR034C								YDR240C						YPR062W	YLR359W			YCR107W		YML103C				YGR118W	YBR016W			YLR132C
	YLR115W	YMR021C				YDR216W	YDR240C			YGR008C	YNR016C	YPR035W				YCL040W	YNL271C								YGR224W						YBL072C	YNR003C			YBR033W		YBR140C				YER055C	YHR039C-A			YLR176C
	YLR380W	YER132C				YMR146C	YMR021C			YLL009C	YLR113W	YJR016C				YDR420W	YPL016W								YLL066C						YLR359W	YBL072C			YBR090C		YDR011W				YHR039C-A	YBR082C			YLR219W
	YJL176C	YNL139C				YBR133C	YDR040C			YOR148C	YLR429W	YDL140C				YBR235W	YJR117W								YLR273C						YPR065W	YKL216W			YJR151C		YLR256W				YBL092W	YLR029C			YLR227C
	YKL182W	YOL089C				YMR183C	YML076C			YNL174W	YJR007W	YDL022W				YLR310C	YNL221C								YMR245W						YKL216W	YPR065W			YMR133W		YML086C				YBR016W	YER100W			YLR258W
	YHR064C	YDR166C				YER027C	YNL131W			YNR024W	YDL195W	YLR342W				YCR088W	YBL017C								YPR121W						YGL171W	YGL171W			YNR072W		YNL219C				YLR167W	YHR036W			YLR266C
	YBR248C	YBR081C				YGL011C	YAR002W			YDR114C	YOL051W	YLR347C				YLR378C	YBL022C								YFL050C						YKR092C	YKR092C			YNL018C		YBL045C				YFL038C	YMR134W			YLR345W
	YBR105C	YJL044C				YDR422C	YKR007W			YAL026C-A	YPL226W	YKL210W				YJL198W	YNR016C								YHR134W						YGR083C	YJL188C			YLR165C		YOL004W				YBR082C	YEL003W			YLR412W
	YPL180W	YLR019W				YLR071C	YHR182W			YBR217W	YJR121W	YCR084C				YGL178W	YBL007C								YLR165C						YPL143W	YPL143W			YER065C		YLL040C				YER100W	YER055C			YLR422W
	YLR300W	YKL182W				YNL003C	YDR216W			YDR031W	YGR032W	YAL012W				YDR186C	YCL057W								YBL059C-A						YJL188C	YJL010C			YOR019W		YDR432W				YMR134W	YFL038C			YLR425W
	YDL111C	YLR380W				YOR331C	YMR146C			YHR138C	YFR051C	YDR091C				YBR039W	YLR403W								YNL050C						YJL010C	YGR083C			YJR160C		YER088C				YBR093C	YBR093C			YML002W
	YDR334W	YGR208W				YCL049C	YBL103C			YKL068W-A	YER166W	YGL206C				YLR061W	YHR073W								YPL186C						YPL212C	YOR259C			YNL266W		YPL036W				YEL003W	YDR167W			YML006C
	YML072C	YHR064C				YHR030C	YBR133C			YMR271C	YDR127W	YHR025W				YDL052C	YPL032C								YPR204W						YBL027W	YBL027W			YNR058W		YJL041W				YHR036W	YBL092W			YML009C
	YOR110W	YBR105C				YIL050W	YCR068W			YOR006C	YER172C	YDR238C				YJR065C	YMR165C								Q0105						YPR148C	YPR148C			YHR015W		YOL098C				YKL013C	YLR167W			YML037C
	YDR239C	YLR115W				YJR103W	YPL212C			YBR278W	YDL040C	YGL234W				YKR028W	YJL198W								YDR241W						YGR001C	YPL212C			YMR316W		YNL262W				YBR230C	YGR245C			YML076C
	YOR233W	YJL176C				YMR213W	YGL011C			YDL079C	YLL048C	YAL023C				YKL192C	YPR036W								YMR255W						YLR292C	YER158C			YJL108C		YOR109W				YGR245C	YKL013C			YML100W
	YNL201C	YDL111C				YJL127C	YMR183C			YDR063W	YBR218C	YOR153W				YNL055C	YPR043W								YAL016C-A						YHR021C	YGR001C			YBL031W		YGL173C				YHR143W	YOR281C			YML107C
	YOR344C	YMR288W				YLR186W	YER027C			YER038C	YDR150W	YGL026C				YPL184C	YKR046C								YBR090C						YER158C	YLR292C			YLL005C		YMR196W				YDR167W	YJR069C			YML108W
	YBR030W	YPL180W				YNR006W	YOR331C			YFR003C	YGR178C	YML126C				YPR043W	YOR290C								YBR298C						YAL013W	YAL013W			YOR381W		YGL195W				YOR281C	YNL075W			YML117W
	YDR150W	YDR334W				YMR043W	YLR071C			YKR083C	YLR354C	YGR054W				YPR181C	YJL062W								YCR041W						YOR259C	YGR123C			YNL279W		YIL039W				YJR069C	YBR230C			YML118W
	YDR466W	YOR110W				YJL054W	YDR422C			YDL115C	YDL140C	YDL229W				YMR080C	YBR235W								YDL158C						YGL039W	YEL071W			YJL216C		YGL167C				YNL075W	YDR002W			YMR021C
	YLR429W	YLR300W				YBR273C	YHR030C			YDL050C	YGR090W	YML010W				YOL004W	YLR310C								YDR201W						YHR196W	YGL039W			YOL091W		YLL026W				YDR002W	YKR047W			YMR030W
	YOR141C	YBR248C				YER068W	YLR186W			YDR162C	YIL125W	YEL031W				YGR055W	YDR420W								YDR355C						YEL071W	YHR196W			YLR162W-A		YML072C				YKR047W	YJR110W			YMR042W
	YNL049C	YNL201C				YOR275C	YIL050W			YKL001C	YLR342W	YMR205C				YLR354C	YKL212W								YEL030W						YGR123C	YDR226W			YJL106W		YDL223C				YPL093W	YPL093W			YMR060C
	YGR134W	YLR023C				YIL079C	YJR103W			Q0130	YPL262W	YMR012W				YJL130C	YGL178W								YGL051W						YBR230C	YLR167W			YLR394W		YCR034W				YJR110W	YGR079W			YMR064W
	YLR310C	YOR233W				YJR078W	YNL003C			YBR062C	YKL068W	YOR204W				YFL041W	YJL130C								YGR230W						YDR226W	YHR021C			YHL042W		YKL157W				YGR147C	YGR147C			YMR066W
	YLR188W	YOR344C				YLR172C	YCL049C			YDR196C	YFL004W	YLR432W				YDL195W	YKR028W								YLR297W						YLR167W	YBR230C			Q0050		YBL007C				YGR079W	YNL035C			YMR075W
	YDR527W	YDR239C				YML114C	YMR213W			YDR201W	YBR202W	YGR240C				YNL239W	YDR186C								YMR233W						YER123W	YER123W			YDR241W		YAL037C-B				YNL035C	YHR143W			YMR084W
	YNL315C	YBR030W				YDL040C	YNR006W			YDR273W	YOR326W	YPR074C				YPL082C	YCL040W								YNL078W						YPL090C	YLR195C			YIL172C		YOR374W				YDR025W	YDR299W			YMR104C
	YNL121C	YML072C				YNR033W	YJL127C			YGR230W	YDL022W	YER165W				YOR171C	YLR061W								YNL133C						YMR131C	YMR131C			YJL221C		YOR317W				YMR028W	YKR060W			YMR111C
	YLR410W	YDR466W				YOR081C	YJL054W			YHR060W	YER064C	YBL027W				YMR247C	YMR080C								Q0130						YDL161W	YPL090C			YLR119W		YAL005C				YDR299W	YDR025W			YMR124W
	YGL129C	YDR150W				YOR221C	YMR043W			YLR271W	YGR061C	YER074W				YPL023C	YPL184C								YDL068W						YLR195C	YLR022C			YLR275W		YIL005W				YKR060W	YMR028W			YMR126C
	YPL016W	YOR141C				YGR237C	YBR273C			YLR275W	YKL182W	YNL178W				YOL098C	YFL041W								YJL013C						YGL031C	YGL031C			YPL158C		YKL204W				YJL190C	YFL005W			YMR154C
	YNL096C	YGR134W				YDR423C	YIL079C			YOL086W-A	YDR174W	YGR214W				YGL173C	YNL055C								YOR082C						YLR022C	YDL161W			YPR142C		YOR160W				YPL090C	YKR014C			YMR167W
	YNR031C	YDR527W				YOR092W	YER068W			YOR258W	YLR083C	YKL181W				YGR178C	YLR378C								YDR078C						YEL065W	YER035W			Q0085		YAL029C				YKR014C	YMR005W			YMR168C
	YNR033W	YLR429W				YGR097W	YOR275C			YJL077C	YLR347C	YBL092W				YMR203W	YDL052C								YDR379C-A						YER035W	YAR015W			YDR253C		YEL022W				YFL005W	YJL190C			YMR190C
	YFL033C	YLR188W				YMR172W	YLR172C			YNL286W	YER090W	YIL052C				YER141W	YNL239W								YER060W-A						YNL247W	YNL247W			YIL030W-A		YLL013C				YLR175W	YFL010W-A			YMR251W
	YPL173W	YLR310C				YOR316C	YML114C			YDL243C	YPR035W	YDL083C				YMR136W	YJR065C								YGL149W						YDR194C	YPL210C			YNL333W		YLL001W				YFL010W-A	YPL227C			YMR257C
	YFL013C	YNL049C				YPR070W	YNR033W			YJL179W	YDR091C	YPL079W				YCR061W	YPR181C								YIL057C						YPL210C	YDR194C			YPL250C		YGL084C				YMR005W	YOR110W			YMR265C
	YNL239W	YLR186W				YPL049C	YDL040C			YNR034W-A	YAL026C	YDL228C				YMR012W	YCR088W								YJL108C						YLR186W	YEL065W			YPR025C		YJR091C				YOR110W	YJL033W			YMR280C
	YPL159C	YLR410W				YLR455W	YJR078W			YOR277C	YGL167C	YNL067W				YLR023C	YJL020C								YML083C						YAR015W	YLR186W			YMR017W		YDR266C				YJL033W	YLR175W			YMR304W
	YJR090C	YNL315C				YDR417C	YGR097W			YPR101W	YNR013C	YGR118W				YDR301W	YOL004W								YMR107W						YLR033W	YOR327C			YFR023W		YLR258W				YBL027W	YJL122W			YNL003C
	YGR237C	YNL121C				YPL232W	YOR081C			YER067W	YKR001C	YDR064W				YJL097W	YKL192C								YMR118C						YBL024W	YNL166C			YAL019W-A		YDR335W				YPL227C	YPL090C			YNL020C
	YBL105C	YNR033W				YJL053W	YOR221C			YHR156C	YBL024W	YDR445C				YOR081C	YBR039W								YMR132C						YEL015W	YLR033W			YEL059C-A		YDL237W				YGL103W	YBL027W			YNL073W
	YBR059C	YPL159C				YNL137C	YOR092W			YPL168W	YLR430W	YPR044C				YLR305C	YDL195W								YPR078C						YOR327C	YBL024W			YKL011C		YNL280C				YCR013C	YDL153C			YNL077W
	YMR038C	YGL129C				YER019W	YPR070W			YNL211C	YER089C	YDR450W				YBR092C	YGR055W								YFL031W						YOR243C	YEL015W			YLR298C		YLR089C				YDL153C	YGL103W			YNL078W
	YHR163W	YPL016W				YOR022C	YOR316C			YDR532C	YOR153W	YPL197C				YDL111C	YPL082C								YBR124W						YCL031C	YOR243C			YMR320W		YML017W				YJL122W	YLR022C			YNL106C
	YIL115C	YNR031C				YDR408C	YGR237C			YDL065C	YPL221W	YDL081C				YBR261C	YOR171C								YDR393W						YBR105C	YCL031C			YKL188C		YIL101C				YDL100C	YDL100C			YNL127W
	YDR186C	YPL173W				YER167W	YMR172W			YGR222W	YKL210W	YLR154W-F				YKR031C	YLR354C								YGL183C						YCL025C	YBR105C			YML098W		YMR278W				YLR022C	YMR043W			YNL174W
	YBR079C	YFL013C				YGR112W	YDR423C			YIL004C	YGL092W	YML063W				YOR085W	YMR247C								YMR306W						YIL021W	YCL025C			YBL059W		YPL190C				YKL143W	YCR013C			YNL187W
	YJL121C	YNL096C				YGL043W	YLR455W			YOL132W	YMR203W	YDL191W				YNR030W	YPL023C								YOR218C						YNL113W	YIL021W			YGR067C		YAR042W				YPR112C	YKL143W			YNL192W
	YGR178C	YNL239W				YHR082C	YDR417C			YBR162W-A	YCR084C	YJR123W				YOR323C	YOL098C								YJL182C						YAR002W	YAR002W			YGR259C		YDL052C				YMR043W	YGL043W			YNL230C
	YKL039W	YFL033C				YHR163W	YNL137C			YIL002W-A	YMR079W	YJL190C				YGL040C	YGR178C								YPL071C						YBR154C	YNL113W			YMR306W		YGR250C				YGL043W	YPR112C			YNL245C
	YOR132W	YJR090C				YJL121C	YPL049C			YOR279C	YDR238C	YOL127W				YMR037C	YGL173C								YPL165C						YDR465C	YKL156W			YDR223W		YLR248W				YGR187C	YGR187C			YNL329C
	YDR054C	YMR038C				YPR025C	YPL232W			YBR147W	YGL206C	YDR399W				YOL052C	YMR136W								YKL217W						YKL156W	YBR154C			YJR023C		YGL140C				YMR044W	YMR044W			YNL339C
	YNL212W	YGR237C				YIL126W	YER019W			YML009C-A	YML010W	YDR447C				YBR126C	YLR023C								YMR040W						YPL106C	YDR465C			YOR265W		YKL085W				YCL054W	YLL011W			YNR031C
	YOR371C	YBR079C				YDR026C	YJL053W			YDR082W	YAL023C	YGR164W				YJL109C	YMR203W								YNR068C						YJR007W	YPL106C			YFL003C		YER017C				YLL008W	YIR026C			YNR047W
	YDL053C	YBL105C				YDR226W	YOR022C			YDR288W	YGR184C	YGR085C				YHR108W	YAR015W								Q0250						YOL144W	YJR007W			YER060W-A		YDR298C				YIR026C	YOR287C			YNR055C
	YLR133W	YBR059C				YHR155W	YOR056C			YML108W	YML126C	YLR441C				YER132C	YMR012W								YBR083W						YIR026C	YOL144W			YMR003W		YLR179C				YLL011W	YLL027W			YNR056C
	YOL040C	YDR186C				YGL122C	YER167W			YEL072W	YGL026C	YKR057W				YJL176C	YDL111C								YBR211C						YDL167C	YJR144W			YKR103W		YJR041C				YBL001C	YCL054W			YNR059W
	YER063W	YHR163W				YJL198W	YHR082C			YLL005C	YBL047C	YPL142C				YKL198C	YBR261C								YEL018C-A						YJR144W	YIR026C			YLR021W		YMR237W				YAR002C-A	YLL008W			YNR060W
	YJR033C	YIL115C				YMR197C	YGL043W			YPR107C	YLR398C	YBR181C				YBR202W	YDR301W								YER054C						YDR158W	YDL167C			YDR438W		YIR038C				YOR287C	YAR002C-A			YNR070W
	YJL081C	YGR178C				YMR038C	YGR112W			YOR102W	YGR054W	YDL075W				YHR082C	YCR061W								YER147C-A						YER057C	YDR158W			YLR174W		YHL034C				YLL027W	YBL001C			YOL023W
	YGR193C	YDR054C				YAL012W	YDR408C			YAL059W	YDR293C	YOR096W				YOR027W	YKR031C								YER186C						YER095W	YER095W			YMR040W		YCR067C				YHR192W	YBR105C			YOL034W
	YGR198W	YJL121C				YGR252W	YPR025C			YBL036C	YLR027C	YPR102C				YJR148W	YOR081C								YGR072W						YOR340C	YER057C			YMR132C		YBR234C				YBR105C	YHR192W			YOL046C
	YDL005C	YKL039W				YLR052W	YLR084C			YDL154W	YGL234W	YKR094C				YGL049C	YBR092C								YGR271C-A						YOR293W	YOR340C			YPR158W		YGR052W				YNL162W	YOR198C			YOL079W
	YIL044C	YPL135W				YBR212W	YHR163W			YBL090W	YKL054C	YHR010W				YJL080C	YJL097W								YHR036W						YOR294W	YOR294W			YAL027W		YJR137C				YOR198C	YNL162W			YOL084W
	YIR001C	YOR132W				YOR330C	YJL198W			YJL031C	YEL046C	YDR500C				YGR097W	YJL109C								YIL002W-A						YKR059W	YOR293W			YAL067C		YMR054W				YOL018C	YNL061W			YOL087C
	YBL047C	YLR133W				YER154W	YHR155W			YPL185W	YEL031W	YMR260C				YNL137C	YLR305C								YJL106W						YJL050W	YKR059W			YDR201W		YKR082W				YOR115C	YOL018C			YOL089C
	YPR029C	YDL053C				YLR419W	YJL121C			YNL038W	YOL126C	YPL198W				YPR024W	YER141W								YJR004C						YER075C	YDR382W			YGL152C		YKL129C				YJL009W	YPL094C			YOL091W
	YCL005W-A	YNL212W				YNL054W	YGL122C			YOR075W	YMR308C	YGL031C				YBL042C	YOR323C								YJR050W						YDR382W	YER075C			YER186C		YLR096W				YNL061W	YGR161C			YOL100W
	YDL202W	YOR371C				YKR028W	YDR026C			YFL013W-A	YBL017C	YGR106C				YGL092W	YOL052C								YJR099W						YPR145W	YJL050W			YBL043W		YBR220C				YPL094C	YFL023W			YOR019W
	YOR198C	YGR198W				YNL288W	YIL126W			YLR007W	YMR243C	YGL030W				YDR135C	YMR037C								YKR015C						YML105C	YMR089C			YBL107C		YJR109C				YPR148C	YPR148C			YOR049C
	YBR092C	YOL040C				YIL056W	YMR038C			YKL138C-A	YOL081W	YIL148W				YGL038C	YER132C								YLL005C						YPL217C	YML105C			YER030W		YOR128C				YFL023W	YEL065W			YOR058C
	YIR004W	YJL081C				YML112W	YGR252W			YKL188C	YMR012W	YPR062W				YMR205C	YNR030W								YLL057C						YMR089C	YPL217C			YER038C		YDR477W				YPL057C	YPL057C			YOR060C
	YNL288W	YER063W				YCR083W	YAL012W			YOR298W	YPL028W	YGL103W				YLR094C	YKL198C								YLR221C						YLR333C	YDR450W			YIL166C		YNR017W				YLR002C	YJL009W			YOR064C
	YMR002W	YJR033C				YOL133W	YER154W			YJR050W	YGL148W	YML026C				YLR113W	YJR148W								YML009C						YBR034C	YPR145W			YIR017C		YPR019W				YDL207W	YLR002C			YOR065W
	YOR171C	YGR193C				YOR001W	YOR330C			YDL068W	YMR296C	YPR132W				YKL104C	YGL036W								YMR077C						YDR450W	YLR333C			YIR023C-A		YER113C				YEL065W	YDL207W			YOR080W
	YDR093W	YDL005C				YLR439W	YLR419W			YGR236C	YBR084W	YLR406C				YEL043W	YHR108W								YMR158W						YDL031W	YBR034C			YKR053C		YJL005W				YHR090C	YBR135W			YOR106W
	YPL115C	YCL049C				YIL031W	YDR226W			YHR184W	YDL229W	YKL056C				YDR251W	YOR085W								YMR280C						YPL037C	YDR025W			YML009C		YBR074W				YAL033W	YAL033W			YOR107W
	YPL177C	YMR002W				YML101C	YIL056W			YOR036W	YBR079C	YBR154C				YMR222C	YGL040C								YOR174W						YDR025W	YPL037C			YOL109W		YGL157W				YGR161C	YGR135W			YOR118W
	YGR180C	YCL005W-A				YBL008W	YLR052W			YDR179W-A	YIL041W	YOR182C				YOR233W	YHR082C								YPL205C						YJR047C	YJR047C			YNR025C		YOR187W				YGR135W	YBR267W			YOR166C
	YOL081W	YIR004W				YDL012C	YMR197C			YGL061C	YPR159W	YDR471W				YDR213W	YGR097W								YBR050C						YLR172C	YDL031W			YBR278W		YMR047C				YBR135W	YLR309C			YOR172W
	YMR171C	YIL044C				YDR530C	YKR028W			YLR261C	YGR162W	YGR034W				YGL140C	YBR202W								YDR540C						YLR225C	YLR172C			Q0060		YKL184W				YDL075W	YOL041C			YOR178C
	YLR244C	YKL106W				YDL131W	YBR212W			YDL177C	YPL032C	YPL090C				YFL010C	YOR086C								YEL069C						YKL021C	YKL021C			YOR174W		YJL042W				YMR142C	YDL075W			YOR191W
	YHR037W	YOR171C				YJL042W	YNL288W			YGL249W	YOR204W	YLR325C				YML031W	YJL176C								YGR161W-C						YNL104C	YLR225C			YGR053C		YPL023C				YLR309C	YOL010W			YOR227W
	YER013W	YIR001C				YGR134W	YNL054W			YHR191C	YER086W	YER131W				YKR093W	YBR126C								YHR124W						YOL040C	YOL040C			YPR030W		YMR006C				YBR267W	YPR169W			YOR264W
	YBR225W	YBL047C				YPL173W	YOR001W			YOR189W	YJL034W	YDR339C				YNR019W	YHR086W								YIL161W						YDL201W	YDL201W			YDL059C		YPL246C				YOL041C	YMR142C			YOR291W
	YMR005W	YPR029C				YDR158W	YCR083W			YCR082W	YMR205C	YHL015W				YER105C	YGL049C								YMR166C						YLR229C	YNL104C			YEL069C		YIL033C				YMR146C	YML077W			YOR298W
	YPL145C	YNL288W				YOL126C	YML112W			YMR172C-A	YDL145C	YOR312C				YBR263W	YBL042C								YPR099C						YHR052W	YLR229C			YER158W-A		YER023W				YNL124W	YNL124W			YOR320C
	YMR295C	YBR092C				YOR110W	YIL031W			YPL123C	YHR042W	YML024W				YML078W	YJL080C								YJL213W						YKR071C	YLR406C			YGL188C-A		YER103W				YER162C	YER162C			YOR328W
	YDL088C	YDR322W				YOR250C	YPL262W			YJR023C	YOL030W	YHR063W-A				YJR103W	YOR027W								YJR011C						YLR406C	YHR052W			YLR273C		YHL030W				YPR169W	YKL040C			YOR346W
	YER141W	YPL115C				YDL159W	YOL133W			YGR289C	YGR116W	YKL156W				YOR336W	YPR024W								YKR083C						YKR094C	YKR071C			YNL138W-A		YBR080C				YOL010W	YMR146C			YOR377W
	YGR274C	YDR093W				YDR270W	YLR439W			YBR298C	YLR432W	YHR141C				YBL079W	YNL137C								YPR061C						YKL027W	YKR094C			YOL113W		YDL103C				YKL040C	YGL011C			YOR378W
	YOR090C	YDL202W				YPL236C	YML101C			YCR107W	YLR060W	YLR154W-C				YPR008W	YDR135C								YDL002C						YNR051C	YPR108W			YPR203W		YLR120C				YML077W	YLR332W			YOR384W
	YDR490C	YDR283C				YKL189W	YDR530C			YDL069C	YKL029C	YGL147C				YAL012W	YLR094C								YLR052W						YPR108W	YKL027W			YCR101C		YJR127C				YGL011C	YOR275C			YPL029W
	YOL013C	YLR244C				YGL197W	YBL008W			YDR363W-A	YGL105W	YNL162W				YPL177C	YLR113W								YKR102W						YML073C	YNR051C			YGR179C		YNL297C				YOR275C	YKL156W			YPL044C
	YER176W	YOR198C				YPL249C-A	YDL131W			YDR413C	YCL009C	YOL109W				YKR018C	YGL092W								YLR320W						YGL203C	YML073C			YPL238C		YOR356W				YLR332W	YLR065C			YPL083C
	YBR080C	YPL177C				YKL052C	YDL012C			YER121W	YOR168W	YGL231C				YDR036C	YEL043W								YLR343W						YMR229C	YGR175C			YBR008C		YLR305C				YKL156W	YJR014W			YPL095C
	YCL017C	YMR171C				YOR191W	YOL126C			YLR411W	YJR045C	YOR167C				YDL047W	YGL140C								YBR066C						YGR175C	YGL203C			YER121W		YMR105C				YLR065C	YDR471W			YPL167C
	YOR076C	YDR295C				YPR111W	YGR134W			YML107C	YMR109W	YER117W				YGL206C	YMR222C								YCR016W						YMR235C	YMR235C			YHR048W		YIL022W				YJR014W	YDR060W			YPL174C
	YER158C	YJR093C				YLR380W	YPL173W			YMR018W	YHR064C	YOR293W				YMR216C	YDR213W								YDR042C						YLR138W	YMR229C			YIL015W		YLR339C				YDR060W	YML080W			YPL216W
	YOL004W	YOL081W				YKL121W	YJL042W			YOL077W-A	YLR300W	YDR086C				YGL107C	YMR205C								YDR116C						YGL043W	YGL043W			YLR329W		YNL045W				YDR471W	YDL208W			YPL238C
	YER166W	YBR225W				YDR003W	YOR110W			YOR385W	YGL202W	YOR369C				YDR502C	YKL104C								YEL074W						YPL266W	YLR138W			YIL142C-A		YGR284C				YML080W	YDL131W			YPL248C
	YML031W	YER013W				YBL006C	YOR250C			YPL201C	YGR240C	YLR167W				YCR084C	YOR233W								YER088C-A						YPL019C	YPL266W			YER145C-A		YBR086C				YDL208W	YNL096C			YPL268W
	YBR212W	YGR180C				YOR047C	YDR158W			YNL150W	YBR025C	YDL067C				YMR246W	YGL038C								YIL071C						YBR267W	YPL019C			YGR035C		YDL224C				YNL096C	YML088W			YPR013C
	YGR184C	YMR005W				YCL005W-A	YFL039C			YPR092W	YPR181C	YLR076C				YOR153W	YDR251W								YIL164C						YIL130W	YBR267W			YNL117W		YNL241C				YDR158W	YLR243W			YPR025C
	YOR316C	YBR002C				YLR019W	YDL159W			YGR243W	YJL026W	YJL148W				YMR054W	YML031W								YJL051W						YOR261C	YDR429C			YLR145W		YJR001W				YML088W	YDR158W			YPR030W
	YML010W	YDR408C				YDL111C	YDR270W			YDR119W-A	YER056C	YDL136W				YIL145C	YFL010C								YMR114C						YDR429C	YPL145C			YOL108C		YLL028W				YDL131W	YNL244C			YPR049C
	YER068W	YHR037W				YIL041W	YKL189W			YPL108W	YJR143C	YER002W				YNR017W	YNR019W								YMR317W						YOL022C	YIL130W			YCR010C		YBR159W				YNL206C	YIL065C			YPR095C
	YCR043C	YMR295C				YER149C	YPR111W			YCL067C	YER165W	YGL102C				YPL246C	YMR246W								YOR216C						YPL145C	YOR261C			YDR121W		YBR036C				YLR243W	YNL206C			YPR119W
	YGR116W	YDL088C				YDR153C	YPL236C			YCR039C	YPR074C	YFR032C-A				YGL137W	YJR103W								YOR287C						YDL081C	YDL081C			YAR035W		YPL058C				YNL244C	YBR173C			YPR147C
	YHR076W	YGR274C				YAR002C-A	YKL052C			YLR167W	YGR060W	YLR062C				YBR146W	YDR502C								YOR384W						YJL138C	YOL022C			YJR050W		YDR497C				YBR173C	YIL079C			YPR152C
	YDL193W	YPL145C				YFR024C-A	YLR380W			YMR028W	YFL022C	YMR294W-A				YER027C	YBL079W								YPL185W						YOR052C	YPL012W			YMR255W		YOR086C				YER145C	YER145C			YPR155C
	YHR183W	YDR490C				YPL011C	YGL197W			YNR032C-A	YJL159W	YNL017C				YGR240C	YAL012W								YOR158W						YHR064C	YGR285C			Q0065		YAL036C				YER095W	YPR137W			YPR202W
	YHR186C	YOR090C				YGR208W	YOR191W			YDR259C	YGR086C	YOR234C				YDR238C	YOR153W								YBL113W-A						YHL015W	YJL138C			YKL061W		YOL155C				YIL065C	YER095W			YIL112W
	YOR112W	YOL013C				YDL053C	YOR047C			YGR206W	YER178W	YLR154W-E				YBR149W	YKR093W								YDR461C-A						YGR285C	YGR027C			YPR201W		YPR184W				YJR002W	YDR361C			YLR224W
	YPL084W	YCL017C				YNL287W	YPL249C-A			YDR512C	YPR036W	YFR001W				YNL288W	YER105C								YPL107W						YPL012W	YHL015W			YGR161W-C		YGR199W				YIL079C	YOR202W			YGR089W
	YJL124C	YJL084C				YOL072W	YBL006C			YJR151C	YHR208W	YJL189W				YLR347C	YBR263W								YCL022C						YGR027C	YHR064C			YML118W		YDL015C				YPR137W	YJR002W			YAR018C
	YOR330C	YER176W				YML031W	YDR003W			YBL028C	YIL078W	YJL188C				YLR106C	YGL107C								YJR023C						YDR381W	YDR035W			YBR063C		YEL053W-A				YDR361C	YNR046W			YCL051W
	YDR052C	YER141W				YFL033C	YKL121W			YDL136W	YLR153C	YOR277C				YOL036W	YOR336W								YBR152W						YDR035W	YDR381W			YLR288C		YIL108W				YOR202W	YPL159C			YDR242W
	YEL043W	YML010W				YGL126W	YCL005W-A			YLR082C	YGL008C	YLR154C-H				YLR241W	YPR008W								YAL055W						YFL002C	YDR394W			YKL050C		YDL222C				YBL072C	YMR131C			YDR313C
	YML130C	YLR219W				YDR490C	YDL111C			YPL013C	YGL245W	YLR156C-A				YDR011W	YMR216C								YPL147W						YDL131W	YDL131W			YIL068W-A		YMR008C				YMR131C	YDL106C			YLL040C
	YER089C	YER158C				YGL178W	YDR153C			YDR034C-A	YNL209W	YLR157C-C				YDL040C	YDR036C								YGL152C						YMR061W	YMR061W			YNL228W		YIL047C				YPL159C	YPR044C			YOR054C
	YGR285C	YBR080C				YCL017C	YLR019W			YDR133C	YMR307W	YLR159C-A				YOR316C	YIL145C								YNL149C						YDR394W	YFL002C			YGL174W		YHR039C				YDL106C	YOR094W			YDL149W
	YBL022C	YOR076C				YNL005C	YCL025C			YFR010W-A	YPL160W					YKL010C	YPL177C								YDL169C						YKL120W	YKL120W			YLR341W		YIL155C				YCL050C	YOR206W			YDR243C
	YLL013C	YMR142C				YPL128C	YIL041W			YKL137W	YHR007C					YHR188C	YML078W								YDR363W-A						YIL149C	YNL207W			YJL184W		YBR126C				YOR206W	YCL050C			YDR416W
	YHR050W	YOR316C				YNL239W	YPL011C			YPR109W	YNL178W					YER089C	YDL047W								YJL049W						YIL091C	YIL091C			YHR059W		YPL240C				YOR094W	YGL101W			YER038C
	YBL006C	YGR184C				YLR219W	YDL053C			YNL138W-A	YBL092W					YER178W	YCR084C								YDR386W						YNL207W	YGR214W			Q0255		YGL156W				YGL078C	YGL078C			YFR045W
	YOR267C	YBR212W				YKL146W	YER149C			YJL023C	YDL228C					YLR089C	YKR018C								YFL013W-A						YPR072W	YJL061W			YLL060C		YKL212W				YGL101W	YBL072C			YGL098W
	YGR056W	YML031W				YJL044C	YGR208W			YCR003W	YNL067W					YGL234W	YMR054W								YIR017C						YGR214W	YMR091C			YDR540C		YDR135C				YNR046W	YOR119C			YGR249W
	YHR128W	YOL004W				YPL199C	YOL072W			YDL009C	YPR044C					YHR025W	YLR106C								YLR294C						YLR223C	YLR223C			YIL120W						YOR119C	YHR197W			YHL008C
	YER035W	YER166W				YHR151C	YML031W			YFL050C	YDL081C					YBR112C	YBR146W								Q0085						YMR091C	YLR336C			YOR384W						YHR197W	YER072W			YJL187C
	YJR049C	YER068W				YML013W	YAR002C-A			YOR052C	YDR445C					YML126C	YNR017W								YAL005C						YJL061W	YOL123W			YJL103C						YPR044C	YLR186W			YJR004C
	YLR432W	YGR116W				YOL078W	YFL033C			YNL149C	YKR057W					YNL118C	YGL206C								YBL025W						YLR336C	YER072W			YGL154C						YER072W	YDR289C			YLR007W
	YGL191W	YGR068C				YPL259C	YFR024C-A			YDR308C	YPL142C					YMR145C	YDR011W								YBL059W						YOL145C	YER074W			YGL029W						YLR186W	YKL196C			YLR177W
	YOR356W	YCR043C				YPL092W	YGL178W			YLR200W	YPL198W					YPL169C	YPL246C								YBR047W						YOL123W	YDR324C			YLR358C						YDR289C	YPR179C			YMR162C
	YML048W	YHR186C				YMR165C	YNL287W			YPR099C	YOR096W					YAL023C	YER027C								YBR162W-A						YER072W	YOL145C			YDR067C						YJL188C	YNL022C			YMR231W
	YNL255C	YPL084W				YBR030W	YDR490C			YOR242C	YGL030W					YLR380W	YLR347C								YBR184W						YDR324C	YDR389W			YDR133C						YKL196C	YDR267C			YNL213C
	YLR065C	YDL193W				YGR061C	YCL017C			YEL003W	YER056C-A					YOL137W	YGL137W								YBR201W						YER074W	YNL121C			YEL030W						YER048C	YJL188C			YNL217W
	YDR002W	YHR183W				YER020W	YGL126W			YLR218C	YLR076C					YNR013C	YGR240C								YBR269C						YDR389W	YHR128W			YFR036W						YDR267C	YOL005C			YPL005W
	YBR031W	YOR330C				YJL176C	YNL239W			YBR201W	YNL017C					YPL221W	YNL288W								YCR003W						YHR128W	YER118C			YGR069W						YML093W	YCL031C			YPL172C
	YNL301C	YHR076W				YBR246W	YPL128C			YBR244W	YLR154W-E					YIL137C	YOR090C								YDL079C						YDL103C	YER082C			YLR346C						YNL022C	YML094W			YPL201C
	YOR099W	YML130C				YMR164C	YNL005C			YMR206W	YLR154C-H					YJR031C	YDR238C								YDL091C						YKL010C	YCL045C			YMR114C						YPR179C	YML093W			YPL242C
	YDR372C	YOR112W				YJR093C	YNR054C			YBR253W	YLR156C-A					YLR430W	YBR149W								YDL118W						YCL045C	YKL010C			YPR005C						YCL031C	YER048C			YPL270W
	YOR194C	YJL124C				YPL032C	YLR219W			YNL336W	YLR157C-C					YOR374W	YOL036W								YDR073W						YGL186C	YOR270C			YJR018W						YML094W	YGL244W			YPR061C
	YHR057C	YEL043W				YNL158W	YJL044C			YPR158W	YLR159C-A					YJL084C	YLR241W								YEL067C						YBR202W	YMR099C			YMR251W						YJR145C	YER056C-A			YPR105C
	YDR012W	YDR052C				YOR154W	YOL078W			YIL024C						YFL036W	YMR302C								YFL062W						YMR099C	YBR202W			YNR060W						YMR242C	YMR242C			YMR171C
	YIR034C	YGR285C				YLR405W	YHR151C			YER145C-A						YDR081C	YOR316C								YFR036W						YOR270C	YGL186C			Q0250						YOL005C	YDR346C			YBR214W
	YNL284C	YBL022C				YOR162C	YKL146W			YGL050W						YLR120C	YDL040C								YGL248W						YMR221C	YMR205C			YDL139C						YER056C-A	YJR145C			YHR211W
	YPR041W	YER089C				YDR391C	YBR030W			YIL068W-A						YBR041W	YMR259C								YGR041W						YMR205C	YCR034W			YER104W						YDR346C	YNL229C			YNL019C
	YOL016C	YKL005C				YKL005C	YPL259C			YMR039C						YMR008C	YKL010C								YGR076C						YCR034W	YBL105C			YCR020W-B						YGL244W	YKL030W			YOR347C
	YDL126C	YLL013C				YGR193C	YMR165C			YLR221C						YIL005W	YHR188C								YGR215W						YBL105C	YMR221C			YDL172C						YNL229C	YMR227C			YPR115W
	YLL045C	YOR267C				YPL094C	YBR246W			YMR270C						YOL126C	YER089C								YKL071W						YKL212W	YDL171C			YMR244C-A						YMR227C	YML114C			YDR094W
	YER019C-A	YHR050W				YBR135W	YJR093C			YOL048C						YDL237W	YOR374W								YKL122C						YDL171C	YKL212W			YDR536W						YPR145W	YOR123C			YBR165W
	YER102W	YOL137W				YDR028C	YML013W			YOR223W						YNL287W	YMR145C								YKR020W						YJL159W	YGR060W			YLR004C						YML114C	YKR092C			YCR014C
	YDR119W	YGR056W				YBR289W	YPL092W			YBR128C						YMR308C	YLR089C								YKR103W						YPL082C	YJL159W			YMR232W						YAL035W	YPR145W			YCR024C-B
	YPR103W	YBL006C				YCR033W	YPL199C			YFR023W						YHL004W	YHR025W								YLR079W						YGR060W	YPL082C			YMR111C						YKL096W-A	YHR040W			YDL206W
	YMR135C	YHR128W				YER120W	YMR164C			YOR305W						YLR342W	YNR033W								YLR254C						YHR074W	YPL197C			YBL091C-A						YOR123C	YHR169W			YDR285W
	YKL040C	YJL008C				YIL053W	YER020W			YPR134W						YKL039W	YER178W								YLR283W						YMR307W	YNL305C			YDR259C						YKR092C	YKL028W			YEL006W
	YOR317W	YDR244W				YJR140C	YJL176C			YKL006C-A						YFR051C	YGL234W								YLR329W						YNL071W	YHR074W			YDR313C						YKL030W	YOL144W			YEL075W-A
	YMR074C	YJR049C				YDL087C	YLR405W			YOR287C						YDR264C	YBR112C								YML043C						YGR279C	YMR307W			YGR042W						YKL028W	YML014W			YER142C
	YKL079W	YLR432W				YAL021C	YOR154W			YJL104W						YML059C	YNL118C								YMR244C-A						YPL197C	YGR279C			YMR299C						YHR040W	YAL035W			YHR080C
	YDR023W	YER035W				YGR068C	YNL158W			YPR188C						YMR296C	YPL221W								YMR270C						YHL007C	YNL071W			YOR134W						YHR169W	YOR327C			YJL092W
	YFR006W	YDR153C				YBR060C	YPL032C			YMR201C						YLR300W	YLR380W								YNR002C						YAL043C	YHL007C			YDL214C						YOL144W	YLR229C			YKL062W
	YOR291W	YML117W				YLR399C	YOR162C			YDR185C						YBR221C	YOL126C								YOL157C						YPL091W	YAL043C			YMR245W						YML014W	YGR207C			YLR275W
	YEL001C	YFL036W				YGR013W	YAL044C			YDR357C						YKL204W	YML126C								YOR264W						YMR143W	YPL091W			YGL149W						YGR207C	YNL231C			YLR451W
	YGL207W	YAL021C				YOR371C	YKL005C			YIL115W-A						YHR050W	YLR430W								YOR346W						YLR110C	YLR110C			YBL106C						YOR327C	YJL078C			YMR019W
	YJL178C	YHR187W				YDR239C	YDR391C			YAR008W						YJR001W	YPL169C								YOR365C						YNR043W	YNR043W			YGR153W						YNL231C	YOL142W			YMR250W
	YLR362W	YBR112C				YKR001C	YBR135W			YOR368W						YOR211C	YOL137W								YPL238C						YFL041W	YFL041W			YLR169W						YOR052C	YEL015W			YNL159C
	YLR144C	YLL027W				YLR433C	YGR061C			YPR051W						YML103C	YAL023C								YPL250C						YGL137W	YGL137W			YOR058C						YDR450W	YOR052C			YOR273C
	YDL165W	YBR260C				YKL039W	YIL053W			YKR004C						YDR326C	YFL039C								YHR060W						YJR059W	YMR143W			YKL209C						YLR229C	YDR450W			YOR385W
	YLR287C	YOL036W				YBR260C	YPL094C			YNR065C						YDR505C	YIL137C								YNR059W						YLR301W	YJR059W			YNR070W						YJL078C	YKL096W-A			YPL038W
	YGR186W	YCR093W				YMR295C	YGR193C			YLR312C						YJR143C	YJR031C								YDR312W						YDL095W	YLR301W			YER087C-A						YEL015W	YDL051W			YBR225W
	YDR432W	YIL129C				YDR150W	YDR028C			YCL048W						YJR059W	YNR013C								YOR106W						YBR015C	YMR070W			YKR106W						YML073C	YBR034C			YER169W
	YIR007W	YNL284C				YHR108W	YJR140C			YIL020C-A						YMR275C	YJL084C								YCR020C						YDR129C	YDL095W			YOR264W						YOL142W	YCL029C			YHR164C
	YGR085C	YIR034C				YOR367W	YBR289W			YGL154C						YLL013C	YDR081C								YLL032C						YKR093W	YDR129C			YOR393W						YGR175C	YML073C			YMR180C
	YNL067W	YDR012W				YPL042C	YGR068C			YGL059W						YGL167C	YLR120C								YER024W						YER090W	YER090W			YPL281C						YBR034C	YOR260W			YOL152W
	YLL015W	YDL126C				YDR325W	YCR033W			YDR461C-A						YPL128C	YFL036W								YPL051W						YBR035C	YBR035C			YDR275W						YOR232W	YOR232W			YCR030C
	YLR292C	YER019C-A				YOR299W	YAL021C			YBL049W						YBR058C	YBR041W								YGR042W						YJR077C	YBR084W			YJR095W						YCL029C	YBR057C			YDR132C
	YLR148W	YLL045C				YHR208W	YDR239C			YGL080W						YJL002C	YDL237W								YDR019C						YBR084W	YBR015C			YML034W						YDL051W	YGR175C			YOL015W
	YJR032W	YER102W				YBL082C	YER120W			YBR167C						YHR032W	YMR008C								YLR068W						YPR080W	YKR093W			YDR482C						YLR355C	YER158C			YAL037W
	YDR177W	YPR103W				YHL009C	YBR060C			YDR016C						YJL041W	YIL005W								YDR136C						YER083C	YPR080W			YCR105W						YOR260W	YPR124W			YEL009C
	YGR118W	YDR119W				YML106W	YDL087C			YDR403W						YOR330C	YMR308C								Q0060						YNL298W	YJR077C			YDR078C						YBR057C	YNL113W			YEL061C
	YHR026W	YKL040C				YLR162W	YGR013W			YDR468C						YBR265W	YHL004W								YBL048W						YHR174W	YML008C			YFR001W						YGR214W	YLR355C			YER041W
	YOR039W	YMR074C				YKR062W	YOR371C			YNL215W						YAL038W	YLR342W								YBL091C-A						YBR196C	YHR174W			YGL226W						YPR124W	YPL135W			YGL151W
	YCL031C	YMR135C				YGR102C	YLR433C			YOR179C						YMR129W	YKL039W								YDL200C						YML008C	YMR145C			YML099W-A						YNL113W	YJL010C			YJL141C
	YBR035C	YKL079W				YNL080C	YLR094C			YPL170W						YER020W	YNL287W								YDR308C						YMR208W	YBR196C			YDR163W						YER158C	YLR292C			YNL149C
	YKL186C	YDR023W				YIL142W	YLR399C			YKR040C						YEL032W	YMR296C								YDR323C						YMR012W	YLR436C			YIR027C						YLR292C	YDR465C			YPL134C
	YGL022W	YFR006W				YPL085W	YDR067C			YBL059C-A						YGL035C	YFR051C								YDR438W						YNL052W	YER083C			YGL061C						YPL135W	YGR214W			YPL258C
	YML058W	YEL001C				YOL040C	YMR295C			YDR045C						YPR074C	YML059C								YGL153W						YEL013W	YNL298W			YMR156C						YDR465C	YCR051W			YAL058W
	YKL213C	YOR291W				YML032C	YBR260C			YHR121W						YLR429W	YDR264C								YIL008W						YOR370C	YMR012W			YLR431C						YER077C	YPL037C			YBL101C
	YJL143W	YJL178C				YMR288W	YOR324C			YKL122C						YER164W	YML103C								YJR082C						YGL173C	YMR208W			YOR237W						YJL010C	YJR063W			YBR260C
	YMR208W	YGL207W				YOR353C	YJL184W			YMR132C						YOR160W	YLR300W								YKL011C						YMR149W	YER099C			YDL069C						YPL037C	YLR195C			YDR034C
	YOL086C	YLR362W				YKR096W	YKL039W			YML055W						YDR266C	YKL204W								YLR423C						YDL236W	YNL052W			YGL248W						YLR195C	YER077C			YDR470C
	YNL135C	YLR144C				YER086W	YDR325W			YJL173C						YBR132C	YOR211C								YML034W						YPL028W	YGL173C			YLR323C						YNL024C-A	YNL024C-A			YDR472W
	YCR009C	YLR287C				YBR079C	YPL042C			YJR107W						YJR045C	YHR050W								YML099W-A						YER099C	YEL013W			YMR158W						YLR196W	YLR196W			YER020W
	YPL001W	YGR186W				YOL081W	YLR162W			YDR316W						YJR016C	YJL082W								YMR085W						YKR066C	YOR370C			YOR082C						YJR063W	YOL088C			YFL042C
	YKL057C	YDL165W				YOR311C	YOR299W			YML068W						YAL026C	YDR326C								YMR299C						YGR189C	YMR149W			YBL086C						YCR051W	YGL211W			YGL154C
	YBR286W	YLL015W				YHR186C	YOR367W			YER050C						YLR034C	YJR001W								YOR064C						YNL135C	YNL135C			YEL077C						YOL088C	YNL166C			YGR003W
	YLR348C	YNL067W				YPL180W	YKR001C			YER159C						YLR244C	YBR221C								YPL156C						YDR072C	YKL210W			YJR021C						YMR311C	YER122C			YHR120W
	YDR471W	YGR085C				YDR244W	YDR150W			YKL041W						YML035C	YDR505C								YLR119W						YHR098C	YDL236W			YJL089W						YER122C	YGL019W			YKL129C
	YKL114C	YIR007W				YBR112C	YHR208W			YKR074W						YOL030W	YHR032W								YIL073C						YKL210W	YKR066C			YIR031C						YNL166C	YMR033W			YKR031C
	YBR187W	YKL008C				YMR171C	YHR108W			YNL122C						YPL049C	YJR059W								YPR122W						YNL139C	YPL028W			YLR377C						YMR033W	YMR311C			YKR034W
	YJR088C	YLR292C				YLR215C	YHL009C			YNL188W						YPL226W	YMR275C								YPL174C						YLL012W	YLL012W			YDR256C						YGL019W	YGL171W			YLR454W
	YPR118W	YCL031C				YNL096C	YKL116C			YOR249C						YMR221C	YLL013C								YLR271W						YEL032W	YHR098C			YFR010W-A						YGL211W	YCR047C			YMR232W
	YNL004W	YJR032W				YBR195C	YBL082C			YLR343W						YHL007C	YJR143C								YFR026C						YJL121C	YGR189C			YBL028C						YCR047C	YKR039W			YMR270C
	YGR020C	YDR177W				YKL192C	YML106W			YDR499W						YER155C	YEL032W								YGL199C						YDR342C	YDR072C			YCR041W						YGL171W	YDL122W			YMR271C
	YBL041W	YGR118W				YHL029C	YDR287W			YMR150C						YAL022C	YJL041W								YKR061W						YCR088W	YJL121C			YDR312W						YKR039W	YDR092W			YOL156W
	YIR037W	YOR039W				YPR072W	YIL142W			YNL012W						YDL140C	YGL167C								YDL243C						YLR414C	YNL139C			YJL051W						YDR092W	YOR294W			YOR205C
	YGR135W	YLR148W				YKL106W	YGR102C			YOR237W						YJR090C	YLL044W								YJL184W						YLR203C	YEL032W			YJL182C						YDL122W	YGL106W			YOR289W
	YPL004C	YHR026W				YER141W	YKR062W			YER046W-A						YNL104C	YBR265W								YJR155W						YKL008C	YKL008C			YNL187W						YGL106W	YGR202C			YPR158W
	YGL017W	YJL143W				YER158C	YMR288W			YPL038W						YNL322C	YPL128C								YDL005C						YBL017C	YCR088W			YOL134C						YJL168C	YJL168C			YNL254C
	YPL154C	YBR035C				YBR068C	YNL080C			YDR322C-A						YML075C	YOR330C								YKR019C						YBR287W	YLR414C			YOR106W						YGR202C	YNL310C			YDR318W
	YJL016W	YKL186C				YPL181W	YML032C			YKR015C						YML010W	YBR058C								YPR005C						YIR034C	YLR203C			YPL077C						YOL038W	YOL038W			YML003W
	YJL190C	YKL213C				YBL105C	YKL124W			YLR254C						YPR183W	YJL002C								YBL075C						YOR098C	YBL017C			YPL124W						YNL310C	YGR001C			YKL209C
	YBR222C	YMR208W				YKL138C	YOL040C			YDR315C						YKL029C	YMR129W								YMR257C						YHR028C	YDL190C			YDR469W						YOR294W	YDL074C			YDR043C
	YKL030W	YML058W				YDR443C	YBR079C			YGL098W						YKL211C	YER020W								YLR016C						YGL206C	YDR342C			YEL018C-A						YDL074C	YOR089C			YER051W
	YGR009C	YOL086C				YKL048C	YOR353C			YKL111C						YMR243C	YAL038W								YKL050C						YKL004W	YBR287W			YGL194C-A						YPR163C	YGR020C			YHR156C
	YHR045W	YPL001W				YBR122C	YOR311C			YNL244C						YGR233C	YER164W								YGR251W						YDR430C	YKL046C			YPR002C-A						YOR089C	YPR163C			YLR024C
	YOR123C	YGL022W				YER166W	YPL085W			YIR031C						YLR291C	YPR074C								YIR020C-B						YGL225W	YOR098C			YBR269C						YGR001C	YMR183C			YOR290C
	YBR042C	YKL057C				YDR092W	YML098W			YKR068C						YCL045C	YMR266W								YKR085C						YER178W	YGL206C			YNL078W						YDR177W	YDR177W			YCL004W
	YNL010W	YCR009C				YGL210W	YKR096W			YNL009W						YEL063C	YPR129W								YNL227C						YDL190C	YBR222C			YPL136W						YGR020C	YBR242W			YCR096C
	YGL080W	YNL135C				YNR048W	YER086W			YIL169C						YER172C	YGL035C								YNL327W						YMR079W	YIR034C			YMR077C						YMR183C	YBR142W			YDR359C
	YJR006W	YDR471W				YDR291W	YHR186C			YGR168C						YGR116W	YLR429W								YPR201W						YFR051C	YHR028C			YFR012W						YBR142W	YPL265W			YER065C
	YJR040W	YBR286W				YER008C	YDR244W			YNL225C						YOR014W	YJR016C								YJR160C						YDR505C	YER178W			YMR009W						YBR242W	YKL114C			YGL071W
	YNL039W	YKL114C				YHR187W	YOL081W			YJR100C						YGL202W	YDR266C								YPL255W						YBR222C	YGL225W			YNL140C						YKL114C	YGR083C			YGR071C
	YPL079W	YBR187W				YDR460W	YJR056C			YBR090C						YJL026W	YOR160W								YER180C						YKL046C	YFR051C			YLR200W						YPL265W	YGR082W			YHL028W
	YGL031C	YJL016W				YHR037W	YPL180W			YCR016W						YPR063C	YBR132C								YMR206W						YNL161W	YDR505C			YPR143W						YGR083C	YML106W			YHR079C
	YNL048W	YBL041W				YCR081W	YMR171C			YDR139C						YCL037C	YPL226W								YHR116W						YBR205W	YMR079W			YBR201W						YHR203C	YNL104C			YLR228C
	YAR007C	YNL004W				YGR274C	YLR215C			YER126C						YER090W	YLR244C								YJR151C						YAL021C	YDR430C			YDR318W						YGR082W	YHR203C			YLR263W
	YML022W	YJR088C				YGL038C	YHL029C			YJR136C						YJL039C	YJR045C								YNL122C						YBR132C	YKL004W			YBL062W						YML106W	YKL074C			YLR318W
	YGL225W	YGR135W				YHR064C	YBR195C			YML030W						YCL017C	YAL026C								YOR044W						YCL011C	YCL011C			YIL158W						YNL104C	YER082C			YLR417W
	YGR295C	YLR348C				YPL115C	YBR112C			YLR298C						YDR174W	YML035C								YJL103C						YMR008C	YNL161W			YHR035W						YDL117W	YDR153C			YML104C
	YIL110W	YPL154C				YEL043W	YPR072W			YPL065W						YER165W	YDR170C								YLR021W						YDR062W	YBR132C			YAL026C-A						YDR054C	YDR054C			YOR131C
	YBR052C	YPR118W				YAL043C	YKL106W			YJR055W						YCR034W	YMR221C								YNR034W-A						YLR088W	YBR205W			YBR184W						YNL247W	YOR210W			YBR044C
	YJR074W	YBR222C				YDL088C	YNL096C			YHL030W-A						YGR054W	YPL049C								YDL154W						YGL026C	YMR008C			YBR250W						YKL074C	YGL122C			YEL030W
	YGR138C	YIR037W				YIL119C	YKL192C			YDR438W						YML111W	YOL030W								YDR146C						YOR220W	YAL021C			YIL071C						YER082C	YPL210C			YNL279W
	YHR063C	YGR020C				YLR429W	YPL181W			YOL128C						YJL186W	YDL140C								YPR141C						YER052C	YDR062W			YKR061W						YPL210C	YDR372C			YOR354C
	YIL014W	YGL017W				YER013W	YBR068C			YIL082W						YHR009C	YHL007C								YHR210C						YDR417C	YOR220W			YNL058C						YGL122C	YPL026C			YBR047W
	YNL024C-A	YPL004C				YMR142C	YER158C			YKL082C						YDR091C	YLR034C								YDR350C						YLL048C	YNL330C			YBL059C-A						YPR035W	YNL247W			YCR015C
	YLR285W	YKL030W				YOL051W	YOR032C			YOR257W						YPR159W	YER155C								YIL024C						YPR181C	YGL026C			YLR227C						YDR153C	YGR167W			YDL238C
	YPL237W	YHR045W				YGR091W	YKL048C			YBR201C-A						YNL197C	YAL022C								YJL162C						YKL207W	YPR149W			YNL012W						YDR372C	YLR033W			YER153C
	YGR029W	YJL190C				YDR025W	YOR158W			YDR248C						YJR077C	YNL104C								YLR431C						YNL330C	YDR417C			YOR044W						YGR167W	YPR035W			YGL127C
	YJR101W	YOR123C				YPR104C	YKL138C			YEL018C-A						YDL160C	YML010W								YPL168W						YDR001C	YLR088W			Q0105						YOR210W	YKL021C			YMR081C
	YDL192W	YGR009C				YBR136W	YBR122C			YFR036W-A						YER064C	YJR090C								YKR022C						YMR275C	YER052C			YGR252W						YPL026C	YAR015W			YPL147W
	YER113C	YNL010W				YKR006C	YBL105C			YFR043C						YGR271W	YKL029C								YOR037W						YDL140C	YKL207W			YIR016W						YLR033W	YGL189C			YKL012W
	YKL196C	YGL080W				YER017C	YER141W			YGL041W-A						YDR062W	YML075C								YOR107W						YPR149W	YPR181C			YBR217W						YKL021C	YOR259C			YGR117C
	YOR061W	YBR042C				YJR049C	YBR002C			YMR299C						YPL183C	YNL322C								YDL130W-A						YLR028C	YMR275C			YBR047W						YAR015W	YDL147W			YHR097C
	YJL099W	YJR040W				YDL030W	YDR092W			YOL079W						YOL121C	YPR183W								YKR050W						YBR212W	YLL048C			YOR073W-A						YGL189C	YHR141C			YJL206C
	YKR035C	YNL039W				YHL004W	YGL210W			YOR134W						YNL301C	YOR317W								YLR200W						YHR073W	YDR001C			YGL251C						YOR259C	YDL174C			YOL078W
	YGL135W	YJR006W				YMR005W	YDR443C			YOR252W						YER107C	YGR116W								YNL187W						YOR085W	YLR028C			YJR099W						YHR141C	YPL212C			YOR006C
	YPR069C	YNL048W				YNL197C	YNR048W			YPR053C						YHR063C	YEL063C								YDR469W						YMR216C	YDL140C			YJR115W						YDL147W	YDR394W			YAL014C
	YGR101W	YIL110W				YDR375C	YDR291W			YML043C						YGL001C	YER172C								YIL082W						YDR047W	YBR212W			YMR096W						YDL174C	YBR155W			YBR163W
	YNL088W	YGL031C				YOL066C	YHR187W			YLR290C						YLL045C	YMR243C								YCR097W						YMR297W	YOR085W			YOR053W						YPL001W	YHR111W			YBR255W
	YIR022W	YJR074W				YLR350W	YOR236W			YBR148W						YER094C	YKL211C								YGL005C						YIL033C	YHR073W			YPL141C						YDR394W	YER123W			YCR079W
	YKR094C	YGR295C				YDR350C	YDR460W			YCR095C						YLR150W	YGR233C								YDR045C						YJR124C	YIR006C			YJL162C						YPL212C	YER183C			YDL109C
	YHR042W	YAR007C				YIL046W	YER166W			YKL050C						YOR063W	YLR291C								YLR312C						YJL041W	YMR216C			YOR193W						YER123W	YML060W			YDL159W
	YDR429C	YGR138C				YNL035C	YER008C			YOL109W						YBR143C	YCL045C								YOR179C						YIR006C	YMR297W			YNL324W						YHR111W	YBL036C			YDR069C
	YMR263W	YGL225W				YOL052C	YCR081W			YOR218C						YMR212C	YOR014W								YER165C-A						YGR271W	YJR124C			YJR122W						YBR155W	YMR200W			YDR103W
	YLR075W	YBR052C				YPL226W	YGR274C			YDR022C						YLR355C	YCL037C								YDR043C						YKR018C	YOR042W			YDR379C-A						YER183C	YGR095C			YDR186C
	YGL044C	YPL237W				YMR224C	YHR037W			YPR046W						YBR082C	YCL017C								YDR151C						YJR117W	YDR047W			YHL031C						YPL106C	YGL246C			YDR198C
	YMR278W	YHR063C				YLL010C	YER134C			YKL099C						YMR033W	YJL039C								YEL076C						YBL037W	YIL033C			YML053C						YMR200W	YPL106C			YDR283C
	YDR304C	YLR285W				YPL083C	YIL119C			YKL036C						YJL061W	YJL026W								YGL194C-A						YLR027C	YGR271W			YMR032W						YML060W	YNL224C			YDR336W
	YDR077W	YNL024C-A				YHR203C	YHR064C			Q0050						YIL133C	YGL202W								YHR015W						YEL009C	YJR117W			YGR239C						YBL036C	YOR293W			YDR379W
	YHR065C	YGR029W				YDL036C	YDL088C			YPR142C						YGL106W	YDR174W								YJR149W						YMR238W	YJL041W			YCR018C						YOR293W	YPL243W			YDR393W
	YKR072C	YKL196C				YFR028C	YPL115C			YMR085W						YER074W	YPR063C								YKL068W-A						YDR457W	YER143W			YPR126C						YER074W	YNL255C			YDR475C
	YML056C	YOR061W				YPR024W	YAL043C			YIL138C						YDL225W	YER090W								YNL038W						YLR179C	YKR018C			YDR240C						YGR095C	YER112W			YER013W
	YNR029C	YJR101W				YKL180W	YEL043W			YPL024W						YDL083C	YGR054W								YML041C						YPL183C	YBL037W			YBL025W						YGL246C	YGR180C			YER030W
	YDL083C	YDL192W				YNL139C	YGL038C			YDL216C						YNL004W	YDR091C								Q0065						YNR019W	YMR238W			YIL161W						YGR180C	YGL147C			YER044C-A
	YIL016W	YJL099W				YNL049C	YOL051W			YHR132W-A						YOL097C	YER165W								YIL030W-A						YFL007W	YLR027C			YPL272C						YPL243W	YER074W			YER104W
	YPL053C	YGR101W				YCL008C	YER013W			YDR236C						YPL037C	YJL186W								YLR318W						YEL027W	YEL009C			YJL035C						YNL224C	YDR159W			YFL033C
	YEL027W	YKR035C				YHR115C	YGR091W			YFR008W						YJL111W	YML111W								YLR455W						YGR266W	YLR179C			YBR211C						YGL147C	YDR429C			YFL034C-A
	YML070W	YDR429C				YIR004W	YLR429W			YIL047C-A						YDL081C	YCR034W								YGL136C						YPL048W	YDR457W			YHR134W						YNL255C	YOR271C			YGL004C
	YDR328C	YGL044C				YPR183W	YDR025W			YOR293W						YLR229C	YHR009C								YGL214W						YDR331W	YDR331W			YKL053W						YCR031C	YGL203C			YGL036W
	YGR117C	YHR042W				YNL315C	YPR104C			YDR340W						YER056C-A	YPR159W								YGR153W						YIL145C	YPL183C			YML068W						YER112W	YCR031C			YGL073W
	YDR450W	YPR069C				YOR141C	YMR142C			YIR023C-A						YER007C-A	YJR077C								YHL002C-A						YHL003C	YEL027W			YNL050C						YDR159W	YHR085W			YGR221C
	YDL015C	YIR022W				YNR031C	YER017C			YMR232W						YOR164C	YNL197C								YHR059W						YAL023C	YPL048W			YPL072W						YDR429C	YOR344C			YGR258C
	YNL178W	YMR263W				YMR162C	YKR006C			YOR020W-A						YJR042W	YDL160C								YHR090C						YFL010C	YIL145C			YGR021W						YGL203C	YPL232W			YGR286C
	YMR039C	YGL135W				YML010W	YBR136W			YJR004C						YFR050C	YER064C								YHR156C						YGL197W	YGR266W			YBR147W						YBL006C	YKL032C			YHR109W
	YFL005W	YNR029C				YBL101C	YDL030W			YDR320C-A						YER099C	YBR084W								YIL172C						YGL022W	YFL007W			YDR308C						YKR059W	YKR059W			YHR218W
	YBR085C-A	YKR094C				YGL100W	YJR049C			YFL046W						YKR026C	YDR062W								YJL221C						YGR260W	YNR019W			YJR102C						YOR271C	YDL201W			YIL095W
	YDR064W	YMR278W				YBR265W	YMR005W			YOR106W						YOR051C	YER086W								YKR078W						YDL145C	YHL003C			YCR071C						YPL232W	YJR113C			YJL137C
	YER021W	YLR075W				YNL212W	YHL004W			YMR245W						YKL216W	YPR145W								YLR051C						YDL015C	YAL023C			YDR532C						YHR085W	YPR060C			YJL157C
	YMR110C	YKR072C				YJL008C	YOL066C			YPR186C						YPR045C	YOL121C								YLR169W						YHR188C	YGR260W			YGL081W						YKL032C	YOR091W			YJL213W
	YMR022W	YNL088W				YBR092C	YLR350W			YNL164C						YKL027W	YNL301C								YLR323C						YPL004C	YGL197W			YPL038W						YOR344C	YKL019W			YJR039W
	YDL103C	YML056C				YHR073W	YNL035C			YAL027W						YNL323W	YGL001C								YML053C						YKL126W	YDL015C			YDR103W						YJR113C	YNR018W			YJR138W
	YCR061W	YPL053C				YOR090C	YOL052C			YPL099C						YER148W	YER094C								YMR194C-B						YHR026W	YGL022W			YAL005C						YDL201W	YER154W			YKL100C
	YNL177C	YDR077W				YIL115C	YNL197C			YJL011C						YNL067W	YLL045C								YNR022C						YPL085W	YFL010C			YOR365C						YOR091W	YDR190C			YLL051C
	YDR399W	YIL016W				YHL030W	YDR350C			YAL063C						YER081W	YOR063W								YOL077W-A						YJR104C	YPL004C			YBR128C						YPR060C	YIL091C			YLR020C
	YIL103W	YDL083C				YBL041W	YIL046W			YGR057C						YJL143W	YLR355C								YPL077C						YNL125C	YHR188C			YKL217W						YNR018W	YBL066C			YLR251W
	YJL156C	YDR304C				YLR309C	YDR375C			YER074W-A						YER048C	YLR150W								YAL047C						YLR459W	YHR026W			YDL002C						YER154W	YLR336C			YLR341W
	YJL002C	YEL027W				YPR103W	YMR224C			YGL243W						YDL061C	YBR143C								YOR115C						YNL238W	YNL125C			YLR254C						YKL019W	YML012W			YLR389C
	YOR181W	YDR328C				YDL084W	YLL010C			YHR136C						YOR361C	YJL061W								YJL225C						YAL022C	YDL145C			YNL133C						YIL091C	YLR225C			YML121W
	YDL067C	YMR039C				YEL013W	YPL083C			YMR233W						YFL045C	YBR082C								YCR071C						YHR083W	YKL126W			YOL023W						YJL054W	YER118C			YML133C
	YJL171C	YML070W				YGL001C	YDL036C			YMR311C						YBL092W	YIL133C								YLR288C						YIL043C	YPL085W			YBR148W						YDR190C	YKR094C			YMR053C
	YLR344W	YGR117C				YDR129C	YFR028C			YPR143W						YJL156C	YGL106W								YDL139C						YHR102W	YJR104C			YML041C						YBL066C	YMR002W			YMR085W
	YKL051W	YDR450W				YML008C	YHR203C			YOR295W						YML069W	YDL225W								YML068W						YPL115C	YHR163W			YGR288W						YML012W	YER094C			YMR090W
	YFL048C	YFL005W				YDL097C	YPR183W			YDR004W						YHR193C	YER074W								YGR067C						YBR169C	YLR459W			YGL136C						YLR225C	YMR091C			YMR102C
	YGR235C	YDL015C				YKR065C	YCL008C			YIR019C						YDL074C	YOL097C								YBR217W						YOL090W	YNL238W			YPR122W						YDR051C	YML130C			YMR204C
	YKR014C	YBR085C-A				YJL190C	YNL139C			YGL042C						YMR091C	YDL083C								YGL116W						YGL157W	YAL022C			YFL013W-A						YKR094C	YLR048W			YNL054W
	YCL039W	YNL178W				YER022W	YIR004W			YIL014C-A						YNL247W	YJL111W								YIL079C						YOR160W	YHR102W			YJL105W						YLR336C	YHR162W			YNL173C
	YBR036C	YER021W				YDL165W	YPR024W			YMR114C						YDL192W	YPL037C								YJL131C						YDL066W	YIL043C			YDR073W						YER118C	YDR226W			YNL326C
	YLR319C	YDR064W				YGR085C	YHR115C			YOL032W						YPL263C	YLR229C								YLR284C						YOR356W	YHR083W			YDR255C						YER094C	YEL071W			YOL029C
	YGR132C	YNL177C				YHR042W	YMR139W			YPL064C						YLR185W	YER007C-A								YML036W						YOR153W	YBR169C			YIL141W						YLR048W	YGR148C			YOL060C
	YOR052C	YDR399W				YHR028C	YNL049C			YKL075C						YKL006W	YDL081C								YNL081C						YPR191W	YOL090W			YOL152W						YMR002W	YPL131W			YOL105C
	YCR028C-A	YMR022W				YCL031C	YGL100W			YDR088C						YDR023W	YER056C-A								YOR073W-A						YFR044C	YPL115C			YOR064C						YML130C	YOL040C			YOR011W
	YDR168W	YMR110C				YDL092W	YKL180W			YBR282W						YOL145C	YJR042W								YPL268W						YDR264C	YDL066W			YPL182C						YPL131W	YER068W			YOR022C
	YMR260C	YCR061W				YGR264C	YOR141C			YBR056W						YOR145C	YER099C								YBR253W						YMR305C	YHR216W			YDR021W						YMR091C	YPL050C			YOR035C
	YNL153C	YDL103C				YIL052C	YBR265W			YDR312W						YLL039C	YFR050C								YNL140C						YJL020C	YGL157W			YDR085C						YLL010C	YLR172C			YOR042W
	YKL046C	YJL156C				YDL081C	YNR031C			YGL164C						YER168C	YKL216W								YBR157C						YNR013C	YOR160W			YLR016C						YDR226W	YLR223C			YOR156C
	YHL034W-A	YJL002C				YJL099W	YNL315C			YIL097W						YKR059W	YOR051C								YHR077C						YDR476C	YFR044C			YHL006W-A						YHR162W	YCL025C			YOR162C
	YKL174C	YDL067C				YER048W-A	YLR115W			YLR263W						YDR064W	YKR026C								YMR251W						YLR342W	YPR191W			YHL016C						YGR148C	YPL266W			YOR363C
	YDL236W	YOR181W				YLR034C	YJL082W			YNL032W						YOL038W	YKL027W								YDL059C						YJL196C	YKL045W			YHR124W						YOL040C	YMR089C			YPL075W
	YJR001W	YKL051W				YGL167C	YBL101C			YNL157W						YER009W	YER148W								YBR063C						YJR091C	YOR356W			YPL186C						YLR172C	YKL216W			YPR153W
	YML024W	YGR235C				YLR109W	YJL008C			YPL146C						YML022W	YJL143W								YLR004C						YLL026W	YDR264C			YKR069W						YGR158C	YER133W			YDR256C
	YOL139C	YLR344W				YNL007C	YHR073W			YPR120C						YCR009C	YNL323W								Q0255						YOL098C	YOR153W			YPL167C						YPL050C	YDR389W			YEL008W
	YGL241W	YJL171C				YOR175C	YMR162C			YLR297W						YNR003C	YER081W								YDR026C						YBR218C	YMR305C			YPL156C						YCL025C	YOL022C			YDL108W
	YML069W	YKR014C				YJL101C	YBR092C			YDL039C						YGR186W	YNL067W								YCR107W						YPR159W	YJL020C			YLR102C						YER068W	YBR048W			YKR041W
	YDL157C	YFL048C				YER148W	YNL212W			YFL026W						YOR260W	YER048C								YOR025W						YDR432W	YNR013C			YLR054C						YKL216W	YKR038C			YBR095C
	YBR154C	YBR036C				YER146W	YIL115C			YPL002C						YKL030W	YOR361C								YPR057W						YNR016C	YJL196C			YGR164W						YER133W	YPR086W			YBR140C
	YOL026C	YOR052C				YKR030W	YDR466W			YOR115C						YPL235W	YDL061C								YBR058C-A						YKL085W	YLR342W			YMR118C						YMR089C	YER057C			YAL017W
	YFL045C	YCL039W				YGR009C	YOR090C			YDR051C						YER072W	YFL045C								YEL059C-A						YML124C	YLL026W			YMR135W-A						YLR223C	YLR138W			YBL091C-A
	YGR262C	YLR319C				YLR333C	YDL141W			YGR030C						YBL027W	YBL092W								YLL007C						YCR093W	YDR476C			YDR026C						YPL266W	YPL063W			YDR459C
	YDR097C	YGR132C				YIL016W	YOL036W			YOR166C						YPR110C	YJL156C								YFR010W-A						YLR378C	YJR091C			YDR082W						YDR389W	YDR324C			YKL015W
	YNR055C	YNL153C				YDR519W	YDR207C			YMR127C						YLR264W	YPL263C								YJL089W						YGL027C	YBR218C			YNR059W						YBR048W	YDL116W			YLR207W
	YNR035C	YDR168W				YDL006W	YDR330W			YKR035C						YKL117W	YHR193C								YER038C						YIL090W	YOL098C			YKL111C						YER052C	YNL071W			YML051W
	YER133W	YMR260C				YNL301C	YIL149C			YLR266C						YCR083W	YML069W								YMR271C						YDR122W	YPR091C			YOR166C						YLR410W	YGL140C			YNL033W
	YLR093C	YCR028C-A				YDR335W	YCR094W			YKL089W						YJL014W	YDL074C								YMR065W						YGR138C	YPR159W			YKL083W						YCL011C	YNL116W			YPL066W
	YDR005C	YKL046C				YML086C	YKL033W			YML036W						YLR029C	YNL247W								YGR120C						YMR006C	YDR432W			YLR152C						YLR106C	YLR106C			YPR054W
	YPR187W	YDL236W				YER007C-A	YER064C			YMR112C						YLR387C	YOL145C								YLR105C						YMR086W	YNR016C			YPR057W						YHR188C	YGR138C			YDL188C
	YDL191W	YHL034W-A				YML026C	YJR090C			YER112W						YML073C	YMR091C								YDL194W						YML059C	YML124C			YPL170W						YBR263W	YGR204W			YFL024C
	YGL012W	YKL174C				YMR278W	YER114C			YMR188C						YMR235C	YLR185W								YDR079C-A						YNL297C	YKL085W			YMR233W						YDL097C	YLR430W			YKL133C
	YJR024C	YOL139C				YGR218W	YLR291C			YGL090W						YCL001W	YLL039C								YDR473C						YLR109W	YCR093W			YOR315W						YER166W	YOR099W			YMR166C
	YOR362C	YJR001W				YJR100C	YKL110C			YHL013C						YLR018C	YER168C								YDR482C						YOL151W	YGL027C			YJR055W						YMR083W	YML124C			YCR045C
	YLR044C	YML024W				YIR008C	YOR140W			YNL155W						YHR181W	YDL192W								YHL050C						YML072C	YLR378C			YPL165C						YNL071W	YMR266W			YDR320C-A
	YPR165W	YML069W				YMR314W	YHR042W			YLR105C						YMR242C	YKL006W								YIR005W						YGL008C	YGR138C			YGR251W						YNL322C	YDR477W			YEL039C
	YER002W	YGL241W				YGL195W	YGR264C			YOR097C						YIR022W	YDR023W								YDR021W						YNL219C	YIL090W			YHR004C						YGL140C	YDR331W			YER059W
	YOL020W	YBR154C				YBL107C	YDL092W			YBL113C						YDR381W	YOL038W								YMR064W						YPR113W	YDR122W			YPL107W						YDL116W	YHR205W			YGL121C
	YOR002W	YDL157C				YJL178C	YIL052C			YMR294W-A						YDL178W	YKR059W								YOR172W						YBR286W	YLR386W			YMR042W						YGR138C	YNL007C			YGL236C
	YER126C	YGR262C				YKL160W	YJL099W			YNL110C						YHR089C	YDR452W								YFL003C						YMR092C	YMR006C			YJL209W						YNL116W	YDL215C			YKL119C
	YDL228C	YDR097C				YEL044W	YDL081C			YDL185C-A						YBR084C-A	YML022W								YER104W						YDR135C	YML059C			YCR020C						YGR204W	YCR042C			YLR214W
	YNL070W	YER133W				YPL246C	YER048W-A			YOR289W						YDR098C	YER009W								YDR008C						YML103C	YMR086W			YHR071W						YLR430W	YMR275C			YLR371W
	YLR406C	YOL026C				YMR088C	YER148W			YKL169C						YGR132C	YDR064W								YIL120W						YBR036C	YML072C			YIL073C						YGL102C	YJL042W			YOR005C
	YHL003C	YFL045C				YHR060W	YLR034C			YDR066C						YPR086W	YER072W								YIR016W						YDR284C	YPR113W			YCR003W						YOR099W	YER021W			YPL099C
	YDR400W	YNR055C				YLR038C	YJL101C			YOR194C						YLR447C	YPR110C								YMR316W						YGL167C	YNL297C			YIR024C						YJR045C	YJL207C			YPL156C
	YMR092C	YDR005C				YLR144C	YGL167C			YML095C						YLR243W	YPL235W								YNL077W						YGR281W	YGL008C			YDR123C						YMR205C	YLR310C			YPR078C
	YHL015W	YJR024C				YOR099W	YOR175C			YOR019W						YGL246C	YOR260W								YNR067C						YBL007C	YOL151W			YHR060W						YMR266W	YJR045C			YPR194C
	YLR447C	YPR187W				YNL253W	YKR030W			YDL139C						YPL210C	YGR186W								YNL198C						YLR250W	YNL219C			YLR312C						YML124C	YOR027W			YBR097W
	YER112W	YOR362C				YGL012W	YER146W			YBR210W						YLR333C	YBL027W								YDR123C						YNL322C	YLR109W			YNL081C						YDR477W	YMR205C			YCR107W
	YDL161W	YNR035C				YJL014W	YIL016W			YIL156W-A						YGL200C	YCR009C								YOL113W						YGL012W	YKL213C			YNR044W						YNL007C	YOR290C			YDR022C
	YAL033W	YOR002W				YDR452W	YLR333C			YBL026W						YNL113W	YJL014W								YLR276C						YER019W	YBR286W			YPL168W						YHR205W	YNL271C			YDR311W
	YAR003W	YDL191W				YPR170W-B	YGR009C			YMR255W						YEL034C-A	YKL117W								YNR062C						YNL102W	YMR092C			YJL023C						YCR042C	YPL082C			YDR325W
	YBR242W	YOL020W				YGR172C	YDL006W			YDR167W						YNL010W	YLR264W								YDR103W						YER069W	YML103C			YBR083W						YER021W	YDR417C			YDR338C
	YCR077C	YLR093C				YGL050W	YDR519W			YJL030W						YBR173C	YMR235C								YGR021W						YLR438W	YDR135C			YFL059W						YJL042W	YKL204W			YDR363W
	YEL009C	YGL012W				YKL016C	YER007C-A			YOR094W						YDL228C	YLR029C								YJR107W						YGR209C	YAL017W			YGR142W						YDR331W	YAL021C			YDR405W
	YBR214W	YPR165W				YPL020C	YNL301C			YDR378C						YER123W	YLR387C								YOL047C						YJR143C	YBR036C			YIL156W-A						YDL215C	YMR314W			YDR428C
	YHR181W	YNL070W				YLR390W-A	YML086C			YHR054C						YHR052W	YML073C								YDR082W						YKL186C	YDR284C			YLR204W						YLR310C	YMR214W			YDR438W
	YGR267C	YDL228C				YCR053W	YDR335W			YOR064C						YOR332W	YHR089C								YPL213W						YDR093W	YGR281W			YMR270C						YOR027W	YDL168W			YEL023C
	YDL212W	YLR044C				YDR098C	YMR278W			YKL172W						YPL243W	YIR022W								YIR036W-A						YJL097W	YBL007C			YPL248C						YNL271C	YER155C			YER079W
	YJL123C	YLR406C				YGR220C	YGR218W			YDL107W						YDR190C	YLR018C								YDR277C						YLR207W	YGL167C			YPL258C						YMR275C	YBR086C			YFR038W
	YMR071C	YAL033W				YBR129C	YML026C			YKL071W						YDR346C	YDR381W								YJR055W						YOL122C	YCL008C			YER058W						YJL207C	YOR307C			YGL197W
	YDR276C	YDR400W				YMR253C	YIR008C			YER117W						YER122C	YHR181W								YGR160W						YDL052C	YLR250W			YML095C						YDR417C	YDR011W			YGR004W
	YOR167C	YHL003C				YMR022W	YJR100C			YCL042W						YKL065C	YMR242C								YLR327C						YKL096W	YLR438W			YER116C						YOR290C	YJL121C			YGR056W
	YLR388W	YBR242W				YML048W	YMR314W			YDL219W						YBR089C-A	YDL178W								YMR193W						YNL130C	YNL322C			YGR230W						YPL082C	YOL030W			YGR057C
	YKL007W	YER112W				YGL054C	YJL178C			YDR086C						YGR267C	YDR098C								YMR269W						YIL047C	YGL012W			YML030W						YAL021C	YIL125W			YGR062C
	YLR264W	YMR092C				YNL326C	YMR088C			YOL091W						YNL207W	YBR084C-A								YGR278W						YMR302C	YER019W			YPL051W						YMR314W	YGL102C			YGR151C
	YJL055W	YDL161W				YBR101C	YKL160W			YJR058C						YKR042W	YGL246C								YIL141W						YDL195W	YNL102W			YMR290W-A						YDL168W	YNL161W			YGR257C
	YDL166C	YAR003W				YDL116W	YPL246C			YDR274C						YJR072C	YPR086W								YIL156W-A						YCR067C	YER069W			YNL198C						YKL204W	YOR168W			YHR129C
	YLL039C	YHL015W				YFR032C-A	YEL044W			YGR076C						YPL266W	YLR243W								YOL101C						YOL020W	YJL097W			YER092W						YMR214W	YER019W			YHR131C
	YCR017C	YCR077C				YOR194C	YGL195W			YMR053C						YIL021W	YNL113W								YPL072W						YHR032W	YKL186C			YOL054W						YBR086C	YLR390W-A			YHR150W
	YJL004C	YLR447C				YNR029C	YLR144C			YDR014W						YGL054C	YGR132C								YLR145W						YAR042W	YJR143C			YBR152W						YDR011W	YJR065C			YHR194W
	YPL271W	YHR181W				YDL185W	YLR038C			YJL103C						YIL118W	YPL210C								YJR115W						YBL045C	YDR093W			YDR386W						YIL125W	YLR436C			YJL210W
	YIL148W	YGR267C				YLR154W-C	YNL253W			YDR515W						YNL231C	YEL034C-A								YKR004C						YHR113W	YOL122C			YBR119W						YER155C	YDL029W			YKL111C
	YOL062C	YEL009C				YGR135W	YHR060W			YGL121C						YDL100C	YLR447C								YPL124W						YDL125C	YGR209C			YJL013C						YOL030W	YNR013C			YKR069W
	YNL130C	YDL212W				YOR362C	YOR099W			YBR256C						YOR253W	YHR052W								YDL172C						YML078W	YKL096W			YMR023C						YOR307C	YMR037C			YKR100C
	YNL323W	YMR071C				YPR026W	YGR172C			YNL166C						YML001W	YLR333C								YDL197C						YBR159W	YLR207W			YLR221C						YOR168W	YKL020C			YML023C
	YOR021C	YJL123C				YLR285W	YGL012W			YML099W-A						YKL120W	YNL010W								YER058W						YJL062W	YDL052C			YPR092W						YLR390W-A	YNL201C			YMR010W
	YNL244C	YDL166C				YDR450W	YPR170W-B			YOR253W						YNL075W	YDL228C								YMR081C						YER113C	YDR307W			YGR064W						YNL161W	YBL022C			YNL202W
	YGL087C	YBR214W				YLR344W	YGL050W			YPL182C						YGL228W	YDR346C								YNL138W-A						YDL224C	YNL130C			YNL128W						YDL029W	YKL010C			YNL238W
	YOR063W	YLL039C				YHR142W	YGR220C			YGL136C						YOR206W	YBR173C								YDL214C						YGL068W	YIL047C			YMR065W						YJR065C	YOR140W			YOL113W
	YPR172W	YJL055W				YOR061W	YBR129C			YNL331C						YMR194W	YER123W								YGR252W						YLR241W	YMR302C			YJL107C						YER019W	YDR342C			YOR030W
	YML055W	YOR167C				YKL137W	YDR098C			YDR103W						YGL123W	YGL200C								YMR156C						YDR141C	YDL195W			YOR385W						YLR436C	YPR159W			YOR084W
	YGL110C	YDR276C				YLR337C	YPL020C			YDL152W						YGR027C	YDR190C								YMR009W						YBR149W	YCR067C			YIR036W-A						YJL121C	YNL101W			YOR120W
	YDR427W	YLR264W				YGR027C	YDR452W			YLR262C-A						YOL124C	YPL243W								YMR028W						YDR420W	YBL045C			YMR194C-B						YNR013C	YMR109W			YOR147W
	YGL231C	YLR388W				YOR052C	YKL016C			YDR393W						YPR108W	YNL207W								YER092W						YGL195W	YHR032W			YGR129W						YKL020C	YGL012W			YOR337W
	YFR004W	YCR017C				YBR187W	YCR053W			YCL055W						YCR035C	YOR332W								YGR089W						YOL057W	YDL125C			YPL174C						YMR037C	YMR110C			YOR373W
	YOR079C	YJL004C				YBR036C	YML048W			YLR283W						YDR496C	YJR072C								YMR135W-A						YGR055W	YBR159W			YBR098W						YBL022C	YMR297W			YPL008W
	YCL001W	YKL007W				YLR292C	YMR253C			YKR022C						YGR214W	YGR267C								YBR089C-A						YKL068W	YOL020W			YKL162C						YNL201C	YKR065C			YPL141C
	YER012W	YOR021C				YDR471W	YGL054C			YHR124W						YOR061W	YER122C								YLR174W						YMR272C	YAR042W			YJL157C						YKL010C	YPR019W			YPL230W
	YPR062W	YOL062C				YDL189W	YBR101C			YJL075C						YLR003C	YKR042W								YDR374W-A						YLR328W	YHR113W			YLR452C						YMR297W	YMR307W			YBL015W
	YCL038C	YIL148W				YPL013C	YNL326C			YPR167C						YHR066W	YBR089C-A								YGL164C						YDR293C	YML078W			YOR216C						YMR307W	YOR142W			YGL219C
	YHR039C	YNL244C				YOR257W	YMR022W			YKR014C						YML093W	YKL065C								YBL113C						YBR139W	YGL068W			YDL169C						YPR159W	YIL090W			YLR086W
	YNL044W	YNL323W				YML079W	YDL116W			YOR123C						YJR088C	YNL075W								YGR004W						YOR086C	YJL062W			YBR297W						YOR140W	YDR062W			YNL204C
	YCR044C	YGL087C				YMR074C	YNR029C			YAL055W						YNL292W	YIL021W								YKL137W						YPL274W	YER113C			YLR320W						YGL012W	YNR043W			YOR386W
	YNL026W	YPL271W				YNL006W	YOR194C			YMR180C						YOR182C	YKL120W								YNR070W						YML075C	YDL224C			YNL014W						YNL101W	YGL137W			YLR452C
	YOR016C	YOR063W				YNL032W	YLR154W-C			YPL225W						YIL110W	YIL118W								YOR358W						YHR165C	YLR241W			YPR136C						YMR109W	YHR026W			YNR045W
	YKL163W	YCL038C				YDR363W-A	YLR388W			YHL044W						YOL142W	YDL100C								YDR181C						YIL039W	YDR141C			YDR339C						YNR043W	YJR125C			YMR141W-A
	YNR061C	YFR004W				YGL017W	YFR032C-A			YBR290W						YKL013C	YGL228W								YGL058W						YCR017C	YBR149W			YMR197C						YKR065C	YBL047C			YBR270C
	YNL100W	YDR427W				YKL073W	YGR135W			YDR370C						YBL093C	YNL231C								YKL075C						YJR127C	YOL057W			YPL138C						YOR142W	YMR203W			YHL049C
	YJR013W	YNL130C				YEL001C	YLR285W			YGL108C						YGR147C	YGL054C								YDL211C						YDR384C	YKL068W			YNL143C						YDR062W	YFR051C			YBR259W
	YJR025C	YGL231C				YPL154C	YOR362C			YOR159C						YMR061W	YOR253W								YBR158W						YFR053C	YDR040C			YBR162W-A						YPR019W	YGL186C			YDR275W
	YDR284C	YGL110C				YOR291W	YDL185W			YDR173C						YOL022C	YML001W								YML030W						YOR109W	YGL195W			YDL091C						YGL137W	YPR114W			YFR031C
	YPL206C	YML055W				YIL088C	YDR450W			YDL104C						YDR445C	YOL124C								YPL013C						YHR045W	YDR420W			YDR478W						YIL090W	YKL057C			YLR152C
	YKL067W	YOR079C				YPL195W	YHR142W			YNL136W						YOL127W	YDR496C								YMR023C						YLR256W	YOR086C			YGR006W						YKL035W	YKL035W			YMR196W
	YGR019W	YER012W				YFR006W	YLR344W			YIL063C						YJL123C	YPR108W								YHL016C						YLR413W	YMR272C			YPL255W						YHR026W	YDR420W			YDL194W
	YHR072W	YNL044W				YBR242W	YOR061W			YKL119C						YDL051W	YMR194W								YMR066W						YPR028W	YDR293C			YPR141C						YBL047C	YLR314C			YKR028W
	YPL273W	YPR172W				YGR262C	YPR026W			YOL149W						YLR197W	YML093W								YBR120C						YNL280C	YIL039W			YJL205C						YMR203W	YMR129W			YOR036W
	YOR261C	YCL001W				YGL041W-A	YOR052C			YBR120C						YKR071C	YGL123W								YER159C						YBL102W	YGR055W			YDR473C						YFR051C	YNL085W			YPR083W
	YKL021C	YPR062W				YJR101W	YBR187W			YDR254W						YPL106C	YGR027C								YFR033C						YBR052C	YBR139W			YKR007W						YGL186C	YNL221C			YDL223C
	YHR201C	YHR039C				YDL043C	YKL137W			YJR118C						YPL273W	YLR003C								YPL011C						YML056C	YLR328W			YMR175W						YKL057C	YBR205W			YER139C
	YLR043C	YCR044C				YIR037W	YGR027C			YMR317W						YBR085C-A	YCR035C								YDL049C						YOR329C	YML075C			YOL114C						YGL008C	YMR008C			YGR122W
	YPL139C	YNL026W				YGL044C	YBR036C			YOR114W						YNL255C	YGR214W								Q0275						YLR034C	YPL274W			YKL178C						YMR129W	YPL091W			YNL034W
	YOR283W	YNR061C				YDL083C	YLR292C			YPL060W						YPL053C	YOR061W								YPL146C						YHR186C	YCR017C			YGL116W						YLR314C	YER009W			YHR099W
	YBL055C	YOR016C				YPL078C	YLR337C			YCR102C						YOL010W	YNL292W								YPL167C						YAL061W	YDR384C			YLR068W						YNL085W	YKL004W			YNL271C
	YKR057W	YNL100W				YJL024C	YDL189W			YLR435W						YPR165W	YOL142W								YGR035C						YGR014W	YHR165C			YOR213C						YDR420W	YPL183C			YJL070C
	YFR036W-A	YJR013W				YGR028W	YDR471W			YOR174W						YLR146C	YIL110W								YLL003W						YOL155C	YJR127C			YGR215W						YBR205W	YKL163W			YLR173W
	YOR332W	YJR025C				YHR132W-A	YMR074C			YGR024C						YNL178W	YJR088C								YLR204W						YBR108W	YLR454W			YPR015C						YNL221C	YGL008C			YLR310C
	YLR301W	YPL206C				YDL070W	YOR257W			YGL051W						YLR344W	YBL093C								YDR255C						YOL011W	YLR413W			YEL005C						YMR008C	YOR067C			YDR124W
	YFL028C	YKL021C				YJL194W	YNL006W			YGL185C						YNL175C	YOL022C								YIL045W						YHL030W	YOR109W			YDR274C						YPL091W	YER090W			YER008C
	YNL084C	YKL163W				YEL029C	YDR363W-A			YKR106W						YPL239W	YOR182C								YJR061W						YMR237W	YFR053C			YKR058W						YJL130C	YOR014W			YFR003C
	YOR234C	YHR072W				YPL004C	YGL017W			YMR263W						YMR251W-A	YKL013C								YLR360W						YKL165C	YHR045W			YPR099C						YER009W	YLR337C			YGR100W
	YJL079C	YPL273W				YHR039C-A	YNL032W			YPL156C						YIL076W	YGR147C								YMR094W						YEL047C	YLR256W			YLR318W						YKL163W	YMR291W			YKL038W
	YKR026C	YOR261C				YDR002W	YPL013C			YPL191C						YDR083W	YDR445C								YNL018C						YLR120C	YNL280C			YKL138C-A						YGL225W	YPR181C			YKL093W
	YGR284C	YDR284C				YKL051W	YML079W			YKL018C-A						YDR005C	YMR061W								YOR244W						YLL015W	YBL102W			YBR290W						YKL004W	YDL048C			YKL203C
	YJL091C	YGR019W				YDR041W	YEL001C			YHR152W						YKR047W	YLR197W								YPL054W						YKR089C	YBR052C			YDR460W						YPL183C	YJL130C			YLR399C
	YDR272W	YHR201C				YDR429C	YPL154C			YDL153C						YOR362C	YDL051W								YOR134W						YPL184C	YPR028W			YFR033C						YER090W	YDR264C			YMR135C
	YOL127W	YKL067W				YMR013C	YKL073W			YHR052W-A						YDR299W	YOL127W								YDR339C						YGL125W	YLR034C			YER015W						YOR014W	YEL052W			YNR065C
	YOL122C	YOR283W				YOR115C	YNL129W			YHR054W-A						YDR412W	YJL123C								YHR078W						YLR440C	YDL188C			YOL035C						YPR181C	YGL225W			YNR072W
	YJR094W-A	YBL055C				YJR051W	YOR291W			YOR177C						YDR278C	YKR071C								YNL217W						YHR047C	YOR329C			YER161C						YMR291W	YOR085W			YOR033C
	YGR248W	YPL139C				YOR210W	YBR242W			YPL174C						YPR169W	YPL273W								YDL037C						YNL241C	YHR186C			YGR076C						YLR337C	YDR046C			YPL175W
	YKR070W	YKR057W				YBL060W	YOR020C			YPL196W						YOR096W	YPL106C								YGL050W						YIL155C	YAL061W			YDL071C						YDR264C	YJR077C			YLR320W
	YLR250W	YFR036W-A				YLR345W	YGR262C			YER146W						YER055C	YLR146C								YGR146C						YHR072W	YGR014W			YBR165W						YPL240C	YOR042W			YER007W
	YBR046C	YFL028C				YOR231W	YJR101W			YHR134W						YPL237W	YNL255C								YHR035W						YLR076C	YML056C			YER159C						YGR240C	YLR187W			YDR366C
	YGR043C	YLR043C				YPR073C	YPL195W			YFL003C						YPL143W	YBR085C-A								YPR092W						YKL163W	YOL155C			YGR169C						YJR077C	YFL041W			YPL104W
	YOR096W	YKR026C				YGL157W	YDL043C			YHR088W						YLR421C	YPL053C								YER161C						YGR172C	YBR108W			YHR036W						YEL052W	YGR240C			YLR437C-A
	YML067C	YOR332W				YJL074C	YGL044C			YJR036C						YDR056C	YNL175C								YGR006W						YGR177C	YHL030W			YLR007W						YDL048C	YPL240C			YJR011C
	YDR322C-A	YLR301W				YFL005W	YGL041W-A			YLR306W						YMR044W	YPL239W								YGR070W						YLR389C	YMR237W			YOR179C						YOR085W	YHR102W			YDR089W
	YBR181C	YDR272W				YHR021C	YIL088C			YGL005C						YNR035C	YPR165W								YNL155W						YBR115C	YKL165C			YOR025W						YLR187W	YMR149W			YEL019C
	YGL020C	YJL079C				YOL076W	YFR006W			YPL052W						YPR163C	YNL178W								YOR022C						YHL017W	YOL011W			YPL088W						YFL041W	YLR069C			YER167W
	YLR390W-A	YNL084C				YIL108W	YIR037W			YAR003W						YIL111W	YDR083W								YPR021C						YJR040W	YPL184C			YKL122C						YBL105C	YLR133W			YGL208W
	YOL090W	YOR234C				YGL244W	YJL024C			YMR175W						YPL010W	YLR344W								YNR007C						YDR368W	YEL047C			YDR184C						YMR149W	YPR089W			YIL158W
	YKL033W-A	YJR094W-A				YCR042C	YDL083C			YBL060W						YDR086C	YIL076W								YDR391C						YLR044C	YKR089C			YDR116C						YBR286W	YBL105C			YKL005C
	YCL011C	YOL127W				YKL114C	YEL029C			YJL115W						YDL067C	YCL035C								YER079W						YLR390W-A	YLL015W			YDR350C						YHR102W	YMR080C			YKL159C
	YER037W	YBR046C				YDL228C	YJL194W			YGR215W						YLR276C	YDR299W								YLR067C						YDR206W	YLR076C			YGR072W						YLR069C	YGR266W			YLR206W
	YNL162W	YGR284C				YGL080W	YGR028W			YLR424W						YOR232W	YDR412W								YOR257W						YCR012W	YLR120C			YHR192W						YLR133W	YJR148W			YML036W
	YGL200C	YJL091C				YGR276C	YHR132W-A			YHR211W						YGR253C	YKR047W								YPL020C						YBL035C	YGL125W			YOR013W						YMR080C	YBR286W			YOR129C
	YBL102W	YLR250W				YGL086W	YPL078C			YER170W						YPR103W	YPR169W								YPR199C						YGR254W	YHR047C			YGR041W						YBL030C	YGR178C			YOR292C
	YDR307W	YKR070W				YLR075W	YKL051W			YBR255C-A						YGL020C	YDR278C								YKL209C						YBR140C	YNL241C			Q0275						YGR266W	YAL026C			YPL074W
	YGR074W	YDR322C-A				YLR372W	YDR429C			YDR013W						YIL103W	YDR005C								YOR252W						YCL009C	YHR072W			YGR287C						YGR178C	YBL030C			YPR091C
	YDL007W	YML067C				YPL065W	YDL070W			YBR188C						YJR123W	YMR251W-A								YJL122W						YGR199W	YLR440C			YFL012W-A						YJR148W	YBL099W			YBR008C
	YHR012W	YGR248W				YNL001W	YDR002W			YDR343C						YDL147W	YOR362C								YMR287C						YGL126W	YIL155C			YGL005C						YBR084W	YBR084W			YBR102C
	YBL035C	YOR096W				YNL219C	YHR039C-A			YIL111W						YDR339C	YPL237W								YOR154W						YHR099W	YGR172C			YHR090C						YAL026C	YGR155W			YDL025C
	YHR081W	YLR390W-A				YOL042W	YMR013C			YLR101C						YBR279W	YER055C								YIL139C						YOR321W	YKL163W			YAL034W-A						YGR155W	YJL039C			YDL133W
	YLR421C	YOL122C				YGR037C	YPL004C			YLR400W						YHR065C	YMR044W								YOR305W						YNR030W	YGR177C			YGR147C						YJL039C	YLR262C-A			YDL180W
	YGL030W	YGL020C				YDR289C	YOR115C			YNL128W						YPL225W	YLR421C								YAR035W						YPL023C	YBR115C			YDR094W						YBL099W	YMR285C			YEL004W
	YDR531W	YBR181C				YOR122C	YOR210W			YOR021C						YBR166C	YOR096W								YBR147W						YOR181W	YLR389C			YOR041C						YMR285C	YKL096W			YEL020C-B
	YLR167W	YKL033W-A				YGL022W	YJR051W			YGL247W						YDR168W	YLR276C								YEL012W						YKL215C	YDR368W			YBL012C						YKL096W	YOR176W			YEL035C
	YDR167W	YGR043C				YDR276C	YDR041W			YKL049C						YNR061C	YDR056C								YER184C						YML117W	YJR040W			YLR108C						YLR262C-A	YIL145C			YER124C
	YOR277C	YER037W				YMR223W	YPL087W			YCR021C						YKL156W	YPR163C								YIL158W						YMR278W	YHL017W			YDR393W						YBR283C	YBR283C			YGL136C
	YNL200C	YCL011C				YGR074W	YDR529C			YKL053W						YGR020C	YPL143W								YJR110W						YAL040C	YLR044C			YGL134W						YIL145C	YOL122C			YGL194C
	YBR256C	YOL090W				YLR170C	YBL060W			YDR467C						YER012W	YDR086C								YKL138C-A						YIL109C	YCR012W			YGR089W						YOL122C	YDR047W			YGL196W
	YKR088C	YNL162W				YNL178W	YOR231W			YHR067W						YGR106C	YNR035C								YKR007W						YER070W	YDR206W			YHR156C						YEL024W	YGL073W			YKR051W
	YMR311C	YDL007W				YKL201C	YGL157W			YCR060W						YIL136W	YDL067C								YMR240C						YHR042W	YLR390W-A			YHR210C						YDR047W	YEL024W			YLR446W
	YOR293W	YGR074W				YCR032W	YGL244W			YJL162C						YDR427W	YPL010W								YNR044W						YDR205W	YCL009C			YFR008W						YDL103C	YFR018C			YMR317W
	YDL137W	YBL102W				YDR064W	YFL005W			YMR260C						YLR093C	YGR253C								YIR027C						YLR270W	YBR140C			YIL079C						YFR018C	YDL103C			YPR116W
	YPL117C	YHR081W				YJL002C	YPR073C			YAL009W						YGR235C	YPR103W								YGL251C						YLL023C	YJL060W			YGR168C						YIL033C	YIL033C			YDR141C
	YGL123W	YDR307W				YHR198C	YHR021C			YDR373W						YLR022C	YIL111W								YDR334W						YLR371W	YIR036C			YDR374W-A						YAL023C	YBR036C			YPL022W
	YJL048C	YGL200C				YKL144C	YIL108W			YER071C						YLR038C	YOR232W								YMR232W						YPL154C	YGR254W			YDR323C						YDR148C	YDR081C			YFR029W
	YPR176C	YLR421C				YGL227W	YLR345W			YCR090C						YPL197C	YGL020C								YPR002W						YJR121W	YGR199W			YER147C-A						YBR036C	YAL023C			YPR164W
	YNL157W	YHR012W				YOL062C	YJL074C			YGL220W						YER100W	YIL103W								YJL011C						YGL040C	YGL126W			YML064C						YDR081C	YKR070W			YDR265W
	YJR123W	YOR277C				YDR328C	YCR042C			YIL019W						YDR447C	YDL147W								YKR012C						YHR039C	YBL035C			YNR022C						YKL201C	YDR148C			YER165C-A
	YBR026C	YBL035C				YGR295C	YOL076W			YOR044W						YOR283W	YHR065C								YMR175W						YBR229C	YHR099W			YBR122C						YNL238W	YKL201C			YGR170W
	YML001W	YDR167W				YJR001W	YGL080W			YLR038C						YDR399W	YDR339C								YOR308C						YBR046C	YOR321W			YOR158W						YCL045C	YGL198W			YHR143W-A
	YJL148W	YLR167W				YGR186W	YKL114C			YLR262C						YML074C	YJR123W								YOR381W						YNR047W	YNR030W			YIL024C						YHR098C	YCL045C			YBR076W
	YPR087W	YGL030W				YOR020W-A	YDL228C			YOR334W						YML067C	YBR279W								YBL085W						YIL108W	YPL023C			YBR107C						YOR336W	YHR098C			YCR106W
	YKL006W	YKR088C				YKL166C	YNL001W			YGR275W						YAL037C-B	YBR166C								YBR033W						YDR127W	YOR181W			YMR081C						YMR122W-A	YNL238W			YER028C
	YMR230W	YPL117C				YPL150W	YLR372W			YDR079C-A						YDR152W	YNR061C								YJR097W						YNR014W	YKL215C			YOL164W						YMR143W	YMR122W-A			YGR224W
	YJL001W	YDR531W				YOL065C	YGR037C			YAL047C						YEL051W	YDR168W								YOR334W						YCR077C	YML117W			YDR391C						YLR372W	YLR020C			YHR011W
	YDL223C	YOR293W				YKR094C	YPL065W			YBR013C						YKR092C	YPL225W								YPR126C						YER119C	YMR278W			YEL041W						YER169W	YOR336W			YJL051W
	YJL136C	YBR256C				YMR256C	YGL086W			YBR183W						YPR133C	YKL156W								YDR163W						YDL086W	YAL040C			YGR004W						YOR020C	YML096W			YKL079W
	YDR100W	YMR311C				YBR085C-A	YNL219C			YDL099W						YHR085W	YGR020C								YOL114C						YOL111C	YLR270W			YKL095W						YLR413W	YER169W			YLR358C
	YPR020W	YJL048C				YDR372C	YLR075W			YFR032C-A						YPL211W	YER012W								YGR168C						YNL138W	YER070W			YKR023W						YBR132C	YLR413W			YNL258C
	YHR010W	YNL200C				YLR154W-F	YOL042W			YMR138W						YKR057W	YLR022C								YPL242C						YKL157W	YHR042W			YOR154W						YNL049C	YLR372W			YOL164W
	YBL036C	YGL123W				YGR118W	YMR223W			YNL079C						YLR449W	YGR235C								YIR023C-A						YGL084C	YIL109C			YBR182C						YDR001C	YNL084C			YPL164C
	YIL076W	YDL137W				YOL020W	YGR074W			YOR369C						YGR005C	YDR427W								YDR495C						YAL051W	YDR205W			YEL018W						YER178W	YNL049C			YPR085C
	YGR232W	YJL148W				YIR007W	YDR289C			YPL166W						YPL142C	YIL136W								YHR191C						YIL121W	YPL154C			YER175C						YDL047W	YBR132C			YJR021C
	YPR198W	YNL157W				YGL232W	YDR276C			YCR020C						YNL002C	YLR093C								YKL089W						YCL057W	YLL023C			YDR146C						YLR044C	YOR020C			YJR033C
	YKL045W	YPR176C				YDR400W	YOR122C			YKR103W						YCR028C-A	YER100W								YMR111C						YOR317W	YIL108W			YGL214W						YNL267W	YDL047W			YDR021W
	YER009W	YML001W				YHR045W	YLR170C			YMR244C-A						YDL148C	YML074C								YOL018C						YML070W	YLR371W			YMR138W						YGR271W	YER178W			YHR119W
	YML004C	YJR123W				YMR211W	YNL178W			YKR050W						YGR019W	YGR106C								YOR080W						YOR173W	YJR121W			YAL037W						YOR370C	YOR320C			YHR165C
	YPL090C	YPR087W				YJL016W	YKL144C			YIR029W						YJL136C	YLR038C								YIR024C						YOL081W	YGL040C			YBR066C						YOR360C	YDR001C			YNL125C
	YLR154W-C	YJL001W				YPR051W	YGL022W			YPR141C						YDR267C	YPL197C								YGR150C						YFL034C-A	YBR229C			YLR105C						YOR355W	YMR143W			YAL028W
	YPL225W	YBR026C				YJR133W	YKL201C			YER042W						YBR181C	YOR283W								YOR030W						YGL198W	YHR039C			YLR155C						YNR019W	YOR370C			YBL052C
	YBR183W	YKL006W				YKL049C	YCR032W			YLR267W						YJR094W-A	YDR447C								YIR031C						YIL048W	YBR046C			YLR157C						YGR270W	YNL267W			YPL040C
	YHR094C	YJL136C				YJL193W	YJL002C			YGR115C						YDR272W	YDR399W								YDR499W						YIR037W	YNR047W			YLR158C						YDL066W	YOR355W			YPR121W
	YGL156W	YMR230W				YLR287C-A	YHR198C			YMR304C-A						YMR256C	YPL211W								Q0045						YPL246C	YDR127W			YLR160C						YEL053C	YOR360C			YMR176W
	YPL010W	YPR020W				YCR044C	YOL062C			YOL117W						YDR087C	YAL037C-B								YDL099W						YDR545W	YCR077C			YHR116W						YOR270C	YGR271W			YOR339C
	YML128C	YHR010W				YOR002W	YDR328C			YNL162W						YDL213C	YLR449W								YJL104W						YLR467W	YNR014W			YLR457C						YKL174C	YEL053C			YGL150C
	YGR063C	YBL036C				YHR065C	YDR064W			YOR312C						YHR063W-A	YML067C								YKL012W						YOR396W	YER119C			YPR093C						YMR054W	YNR019W			YJL103C
	YGR199W	YDL223C				YML069W	YJR001W			YPL020C						YCL059C	YKR092C								YMR126C						YKL127W	YDL086W			YCR016W						YHR123W	YDL066W			YML005W
	YDR447C	YPR198W				YCR017C	YGR295C			YDL166C						YKL067W	YHR085W								YKL208W						YLR304C	YOL111C			YBR120C						YOR253W	YGR270W			YNL328C
	YDL164C	YGR232W				YDR284C	YBL102W			YJL203W						YOL139C	YNL002C								YDR184C						YLR100W	YNL138W			YBR157C						YDR345C	YOR253W			YOR014W
	YDR327W	YDR100W				YOR307C	YOR020W-A			YNL153C						YGL030W	YDL148C								YDL044C						YMR015C	YKL157W			YGL247W						YER069W	YHR123W			YDR004W
	YER044C	YIL076W				YBR181C	YKL166C			YDL002C						YOR276W	YDR152W								YDR088C						YML085C	YAL051W			YMR166C						YPL028W	YKL174C			YGL116W
	YHL017W	YER009W				YDR177W	YPL150W			YPR094W						YLR065C	YGR005C								YER068C-A						YJL052W	YGL084C			YAR031W						YFL009W	YLR044C			YGL224C
	YGR209C	YLR154W-C				YER113C	YGR186W			YOR089C						YMR230W	YPR133C								YNL017C						YIL123W	YIL121W			YOR097C						YHL034W-A	YOR270C			YMR052W
	YDL125C	YKL045W				YNL177C	YGL227W			YNL294C						YJL125C	YKR057W								YOL100W						YGR038W	YML070W			YFR027W						YFR044C	YMR054W			YNL068C
	YNL115C	YPL090C				YNL039W	YOL065C			YDR494W						YNL001W	YEL051W								YCL051W						YCR069W	YCL057W			YKR085C						YDL086W	YDR345C			YLR233C
	YBR302C	YML004C				YJR040W	YMR256C			YKR105C						YER127W	YCR028C-A								YJR087W						YOR002W	YOR317W			YKL147C						YDL140C	YER069W			YLR265C
	YML132W	YPL225W				YJL096W	YLR154W-F			YNL227C						YHR170W	YPL142C								YLR368W						YDR276C	YOR173W			YLR136C						YIL129C	YIL034C			YBL025W
	YER099C	YBR183W				YPL144W	YKR094C			YKL160W						YOR327C	YDR267C								YPL026C						YNR017W	YFL034C-A			YOR037W						YGR032W	YFL009W			YBR055C
	YPR113W	YHR094C				YNL082W	YBR085C-A			YDL092W						YGL231C	YJL136C								YGL113W						YDR411C	YGL198W			YNL149C						YGR218W	YNL278W			YBR176W
	YDL153C	YER044C				YOL102C	YDR372C			YAL028W						YJR069C	YDR087C								YJL078C						YGL187C	YOL081W			YLR294C						YNL190W	YHL034W-A			YFR032C
	YGR106C	YGR063C				YCR077C	YGR118W			YPR038W						YPL220W	YGR019W								YER041W						YHR094C	YIR037W			YHR180W						YBR080C	YPL028W			YGL090W
	YLR166C	YPL010W				YFL048C	YMR211W			YGR147C						YHR196W	YJR094W-A								YGL096W						YKL051W	YIL048W			YOR226C						YCR017C	YDL086W			YJL101C
	YMR090W	YDR327W				YGR235C	YHR045W			YDL059C						YDR328C	YDL213C								YGL249W						YMR178W	YKL127W			YIL098C						YLR399C	YDL132W			YJL108C
	YIL027C	YDR447C				YPR188C	YOL020W			YLR119W						YGL102C	YDR272W								YGR188C						YKR046C	YPL246C			YGR115C						YJL109C	YKL219W			YJR090C
	YDL136W	YML128C				YPR041W	YJL016W			YOR304C-A						YHR021C	YCL059C								YHR143W-A						YCR065W	YDR545W			YOR060C						YPL004C	YIL129C			YJR092W
	YIL040W	YGL156W				YJR024C	YJR133W			YAR027W						YDL075W	YMR256C								YMR172C-A						YAL005C	YLR467W			YBR167C						YDL190C	YNL190W			YLR205C
	YMR178W	YHL017W				YJL143W	YDR400W			YJR008W						YNL308C	YBR181C								YOR078W						YKL203C	YOR396W			YBR193C						YBR041W	YBR080C			YML043C
	YGL147C	YGR199W				YML054C	YGL232W			YER131W						YIL148W	YHR063W-A								YOR110W						YCR030C	YLR304C			YKR019C						YBR149W	YFR044C			YMR113W
	YBR159W	YDL164C				YNL067W	YIR007W			YKL156W						YLR009W	YOL139C								YPL216W						YNL262W	YLR100W			YMR068W						YDL237W	YGR032W			YOL125W
	YPL220W	YGR209C				YKL213C	YPR051W			YML011C						YML024W	YOR276W								YNL128W						YMR304W	YMR015C			YNL136W						YLR342W	YGR218W			YOR212W
	YGL091C	YER099C				YCL001W	YKL049C			YLL002W						YOL077C	YER127W								YER131W						YMR261C	YJL052W			YNL217W						YDL125C	YCR017C			YPL017C
	YBR054W	YDL153C				YPR174C	YCR044C			Q0070						YHR010W	YHR170W								YKL048C						YKR013W	YML085C			YDR173C						YDR129C	YLR399C			YBR019C
	YLR337C	YNL115C				YMR110C	YJL193W			YOR143C						YKR094C	YLR065C								YOL035C						YCL040W	YIL123W			YBR188C						YLR203C	YBR041W			YBR257W
	YJL188C	YBR302C				YGL135W	YHR065C			YJR057W						YDR429C	YGL030W								YLR412W						YPR154W	YGR038W			YDR019C						YKL126W	YJL109C			YDR240C
	YKR042W	YML132W				YOR123C	YLR287C-A			YOR357C						YML063W	YJL125C								YKR106W						YBR054W	YOR002W			YHL013C						YJR059W	YDL237W			YDR443C
	YGR088W	YDL125C				YJR013W	YOR002W			YCR044C						YCL031C	YNL001W								YER116C						YJL079C	YCR069W			YKR022C						YOL020W	YDL190C			YDR464W
	YGR141W	YPR113W				YKL006W	YER113C			YPL267W						YLL008W	YMR230W								YGR243W						YLR337C	YNR017W			YGL153W						YLR459W	YDL140C			YEL049W
	YKR074W	YGR106C				YGR046W	YML069W			YDR410C						YMR143W	YHR196W								YDR316W						YOR230W	YDR276C			YNR007C						YLR398C	YLR107W			YFL030W
	YIL062C	YDL136W				YER102W	YOR307C			YNR022C						YOR210W	YOR327C								YDR336W						YBL101C	YDR411C			YFL052W						YDR400W	YDL125C			YHR005C
	YML063W	YIL027C				YKL150W	YDR177W			YLR151C						YKL143W	YKL067W								YKL076C						YJL171C	YGL187C			YLR271W						YOR356W	YBR149W			YIR016W
	YHR138C	YLR166C				YDR316W	YCR017C			YNR044W						YHR072W-A	YGL231C								YNL252C						YDL141W	YHR094C			YML036W						YGL026C	YPL004C			YJL162C
	YOR089C	YIL040W				YCL033C	YNL177C			YDR256C						YER102W	YPL220W								YOR282W						YJR066W	YKL051W			YMR053C						YLR120C	YGR156W			YJR089W
	YMR251W-A	YGL091C				YJR032W	YBR181C			YDR371W						YDR450W	YJR069C								YDR311W						YNL160W	YMR178W			YLR052W						YOR038C	YLR203C			YLR238W
	YLR262C-A	YMR178W				YGL103W	YJL096W			YJR110W						YFR004W	YHR021C								YDR494W						YLL031C	YKR046C			YOR078W						YDR166C	YKL126W			YMR065W
	YOR253W	YPL220W				YCR082W	YDR284C			YNL140C						YLR292C	YGL102C								YPR009W						YBR126C	YAL005C			YNL097C						YKL046C	YDR129C			YMR086W
	YIL111W	YGL147C				YOR317W	YNL039W			YEL041W						YLR441C	YDR328C								YBL078C						YDL093W	YCR065W			YMR112C						YBR108W	YJR059W			YNL221C
	YPL142C	YMR090W				YPL053C	YJR040W			YLR318W						YOR167C	YNL308C								YPL141C						YLL028W	YKL203C			YER184C						YCR034W	YOL020W			YNL294C
	YDR051C	YBR054W				YLR443W	YPL144W			YPL090C						YKL114C	YDL075W								YNL136W						YOR161C	YCR030C			YKR083C						YPL048W	YLR459W			YOR279C
	YIL136W	YLR337C				YHR063C	YPR041W			YCL002C						YER131W	YLR009W								YML076C						YLR422W	YNL262W			YAL054C						YIR006C	YDR400W			YOR380W
	YBL040C	YBR159W				YPR165W	YOL102C			YBR050C						YBL001C	YOL077C								YFR008W						YKL103C	YMR304W			YBR089C-A						YMR102C	YLR398C			YPL153C
	YNL312W	YJL188C				YJR094W-A	YGR235C			YLR406C						YOR052C	YIL148W								YGR008C						YKL148C	YMR261C			YER028C						YJR143C	YLR342W			YPL168W
	YFL034C-A	YKR042W				YOL033W	YCR077C			YPR068C						YDR372C	YLL008W								YJL206C						YFR019W	YKR013W			YJR112W						YGR014W	YOR356W			YAL063C
	YAL008W	YGR141W				YMR028W	YNL082W			YPL167C						YGL031C	YML024W								YPL038W						YGL037C	YBR054W			YOL043C						YKL210W	YKL045W			YBL012C
	YOR312C	YKR074W				YLL015W	YFL048C			YLR457C						YBR164C	YDR429C								YNL110C						YIL062C	YCL040W			YJR082C						YNL102W	YLR120C			YBL016W
	YLR154W-F	YGR088W				YOL139C	YJR024C			YBL078C						YDL191W	YHR010W								YOR242C						YJL002C	YPR154W			YDR277C						YLR043C	YOR038C			YBL043W
	YOL129W	YHR138C				YDR097C	YPR188C			YJL004C						YER037W	YKR094C								YNL225C						YOR247W	YJL079C			YIL173W						YGR003W	YCR034W			YBR054W
	YBR166C	YIL062C				YHL011C	YPR174C			YML098W						YKL056C	YCL031C								YKR023W						YCR048W	YLR337C			YBR253W						YNL055C	YBR108W			YBR098W
	YBR096W	YML063W				YBR046C	YJL143W			Q0055						YMR239C	YML063W								YOR166C						YOL060C	YOR230W			YER054C						YNL130C	YKL046C			YBR136W
	YGR034W	YLR262C-A				YHR072W	YNL067W			YLR360W						YPL043W	YKL143W								YBR188C						YHR033W	YBL101C			YJL049W						YJL062W	YDR166C			YBR141C
	YPR098C	YOR089C				YGR024C	YML054C			YBR119W						YJL140W	YMR143W								YGL081W						YLL040C	YJL171C			YAL032C						YGR184C	YGL026C			YBR150C
	YLR154W-B	YOR253W				YPL096W	YKL213C			YHR141C						YDR177W	YOR210W								YOR193W						YDL022W	YDL141W			YPL054W						YGL092W	YPL048W			YCR089W
	YLR367W	YMR251W-A				YOR360C	YCL001W			YNR020C						YGR164W	YHR072W-A								YIR004W						YJL141C	YJR066W			YBR201C-A						YDL185W	YMR102C			YDR085C
	YOR006C	YDR051C				YGL110C	YJR013W			YGL248W						YGR187C	YFR004W								YBR182C						YDR032C	YNL160W			YDR355C						YBR208C	YIR006C			YDR122W
	YHR141C	YLR154W-F				YNR035C	YOR123C			YIL166C						YDR280W	YER102W								YDR085C						YLR178C	YBR126C			YOR368W						YML008C	YLR043C			YDR151C
	YER117W	YPL142C				YOR079C	YGR046W			YDR282C						YPL117C	YDR450W								YML015C						YKL100C	YLL031C			YNR037C						YNR031C	YGR014W			YDR223W
	YDR373W	YAL008W				YDR533C	YMR110C			YLR233C						YGL244W	YLR441C								YEL077C						YDR111C	YDL093W			YDR185C						YOL045W	YGR003W			YDR375C
	YLR441C	YIL111W				YKL196C	YKL006W			YNL222W						YHL015W	YLR292C								YDR227W						YJL158C	YLL028W			YEL012W						YJL091C	YJR143C			YEL020C
	YKL056C	YFL034C-A				YCR009C	YGL135W			YIL071C						YOR285W	YOR167C								YJR102C						YML128C	YMR169C			YML042W						YIL088C	YNL055C			YEL041W
	YGL102C	YNL312W				YNL153C	YDR316W			YBR033W						YLR406C	YKL114C								YKR098C						YOR065W	YOR161C			YOR244W						YGR007W	YOR016C			YER047C
	YPR132W	YIL136W				YGL196W	YCL033C			YHL047C						YOR021C	YOR052C								YDL053C						YBL064C	YLR422W			YJL137C						YPR069C	YNL130C			YER144C
	YLR078C	YOR312C				YPL152W	YER102W			YLR166C						YJL190C	YDL191W								YLR135W						YJR001W	YKL103C			YKL089W						YDR411C	YJL062W			YGR216C
	YAL037C-B	YBL040C				YER050C	YJR032W			YOR167C						YPR102C	YER131W								YIL127C						YJL172W	YKL148C			YNL185C						YLR241W	YNL102W			YGR238C
	YJR073C	YBR166C				YPR187W	YPL053C			YML034W						YPR143W	YDR372C								YHL013C						YGR284C	YFR019W			YBR240C						YGL022W	YGR184C			YGR288W
	YOR369C	YOL129W				YDR023W	YCR082W			YFR046C						YDR471W	YBR164C								YDR512C						YPR098C	YGL037C			YLR297W						YHR072W	YKL210W			YHR002W
	YER074W-A	YBR096W				YPR180W	YKL150W			YNL107W						YGR135W	YBL001C								YNR032C-A						YPR160W	YIL062C			YMR294W-A						YKR013W	YBR208C			YHR209W
	YDL135C	YGR034W				YLR066W	YLR443W			Q0120						YDL166C	YMR239C								YDL121C						YPL006W	YJL002C			YDR088C						YGR157W	YGL092W			YIL079C
	YGL161C	YPR098C				YMR208W	YGL103W			YJL013C						YGR103W	YGL031C								YDL129W						YJR073C	YCR048W			YBR113W						YHL003C	YJL091C			YIR032C
	YPL197C	YLR154W-B				YDR080W	YPR010C-A			YLR062C						YDL007W	YPL043W								YMR284W						YIL124W	YOR247W			YDR152W						YBL042C	YOL045W			YJL004C
	YGL226C-A	YLR367W				YIL063C	YHR063C			YLR097C						YKL099C	YER037W								YPL075W						YJL101C	YOL060C			YMR198W						YDR266C	YNL172W			YKL071W
	YNL336W	YOR006C				YGL241W	YHL011C			YGR142W						YOR277C	YKL056C								YER028C						YIR007W	YLL040C			YPL044C						YMR086W	YNR031C			YKL101W
	YBR164C	YHR141C				YAR007C	YJR094W-A			YDL135C						YLR076C	YGR187C								YPR043W						YBR241C	YHR033W			YJL144W						YPR128C	YBR133C			YKL197C
	YDL222C	YER117W				YLR008C	YOR317W			YPR087W						YBR154C	YGR164W								YKR069W						YOR273C	YDL022W			YLR010C						YKL212W	YIL088C			YKR053C
	YMR143W	YDR373W				YLR264W	YLL015W			YFL031W						YGR085C	YPL117C								YDL096C						YER011W	YJL141C			YDR486C						YOR098C	YML008C			YLL060C
	YJL115W	YLR441C				YPL125W	YPR165W			YBL077W						YMR014W	YDR280W								YHR088W						YJL005W	YDR032C			YNL180C						YPR118W	YGR007W			YLR149C
	YHR121W	YKL056C				YKL008C	YOL033W			YER092W						YLR325C	YDR177W								YIL097W						YDR456W	YKL100C			YEL076C						YMR238W	YDR411C			YLR210W
	YOR285W	YJR073C				YOR357C	YMR028W			YFL027C						YGL147C	YGL244W								YNL097C						YNL045W	YLR178C			YLR239C						YDR205W	YPR069C			YML061C
	YBL077W	YLR078C				YLR447C	YOL139C			YDR289C						YHR088W	YJL140W								YOR275C						YMR105C	YDR111C			YPL213W						YLR078C	YLR241W			YMR132C
	YNL150W	YPR132W				YOR094W	YGR024C			YGR105W						YOR261C	YHL015W								YLR452C						YCR061W	YJL158C			YGL071W						YLR378C	YPR128C			YMR299C
	YOR169C	YGL102C				YGL220W	YOR360C			YPL096W						YGR034W	YOR285W								YNR004W						YIR038C	YOR065W			YHR195W						YLR207W	YHR072W			YMR320W
	YBR056W	YAL037C-B				YJL123C	YBR046C			YHL015W						YKR081C	YOR021C								YPR105C						YNL321W	YML128C			YPR131C						YKR018C	YDR407C			YNL172W
	YMR173W-A	YER074W-A				YOR036W	YDR097C			YKL133C						YLR221C	YPR143W								YBR095C						YIL023C	YJL172W			YDR363W-A						YMR208W	YGR157W			YNL210W
	YLR076C	YOR369C				YJL070C	YHR072W			YBR066C						YKL196C	YLR406C								YCR073C						YJL016W	YGR284C			YGL109W						YEL013W	YDL185W			YNL257C
	YLR062C	YDL135C				YGL020C	YPL096W			YDR073W						YFL005W	YGR103W								YDR086C						YJL068C	YJR001W			YLR284C						YFL007W	YDR266C			YNL311C
	YNL143C	YPL197C				YJL171C	YGL110C			YAL033W						YCR087W	YJL190C								YDR087C						YDR144C	YPR160W			YLR289W						YBL056W	YMR013C			YOR390W
	YPL250W-A	YGL161C				YLR319C	YOR079C			YBR022W						YOR312C	YPR102C								YDR252W						YPR184W	YBL064C			YML101C						YEL053W-A	YHL003C			YPL219W
		YGL226C-A				YKR017C	YKL196C			YKR075C						YKL021C	YGR135W								YDR486C						YDR380W	YPL006W			YOR110W						YBL077W	YKR013W			YPL236C
		YBR164C				YJL156C	YNL153C			YPR100W						YDR002W	YDL166C								YDR541C						YOL129W	YIL124W			YDR363W						YPL115C	YGL022W			YIL156W
		YNL336W				YJR008W	YDR533C			YOR059C						YHR039C-A	YKL099C								YGR288W						YDL164C	YJR073C			YGR271C-A						YOR153W	YMR086W			YOR032C
		YMR143W				YLR167W	YGL196W			YLR376C						YLR367W	YDR471W								YMR036C						YDR074W	YJL101C			YCR073C						YJL080C	YBL042C			YDL069C
		YDL222C				YDL191W	YPL152W			YDR311W						YLR175W	YDL007W								YOR385W						YPL036W	YBR241C			YGL205W						YDL052C	YOR098C			YDL091C
		YJL115W				YGL087C	YNR035C			YNL050C						YER019C-A	YOR277C								YFR032C-A						YKL129C	YOR273C			YJL011C						YIL039W	YDR205W			YDL154W
		YHR121W				YLR093C	YCR009C			YPL248C						YML026C	YBR154C								YBR119W						YMR173W-A	YER011W			YJL206C						YJL134W	YKL212W			YFL031W
		YOR285W				YCL024W	YER050C			YDR030C						YCR016W	YMR014W								YBR180W						YOR185C	YIR007W			YKL012W						YNL134C	YPR118W			YJL110C
		YBL077W				YGL231C	YLR008C			YOR234C						YER117W	YLR076C								YKL082C						YBR026C	YJL005W			YDL155W						YDR430C	YMR238W			YMR100W
		YNL150W				YOR111W	YPR187W			YDL043C						YOR369C	YHR088W								YKL149C						YHR016C	YDR456W			YPR053C						YHR103W	YKR088C			YPR109W
		YOR169C				YAR003W	YMR208W			YER133W-A						YMR260C	YLR325C								YLR289W						YGR043C	YNL045W			YDR043C						YLR088W	YLR207W			YCR021C
		YBR056W				YHR046C	YDR023W			YBR154C						YGL103W	YGR085C								YDR314C						YGL006W	YMR105C			YMR064W						YNL192W	YLR078C			YER106W
		YMR173W-A				YJL055W	YPR180W			YDR323C						YDL136W	YGL147C								YKL023W						YOR291W	YCR061W			YBR186W						YIL047C	YMR208W			YJL165C
		YLR062C				YNL225C	YLR066W			YJR135C						YPR132W	YOR261C								YGL041W-A						YPL250W-A	YIR038C			YPL011C						YJL097W	YLR378C			YJR082C
		YLR076C				YER126C	YDR080W			YKR023W						YLR154W-C	YKR081C								YHR080C						YIL101C	YNL321W			YLL032C						YER033C	YEL017W			YOR319W
		YNL143C				YDR378C	YGL241W			YDR152W						YOR089C	YLR221C								YGR017W						YML100W	YPR098C			YDL109C						YGL027C	YKR018C			YPL148C
		YPL250W-A				YNL160W	YAR007C			YDR328C						YGR118W	YGR034W								YJL222W						YBR056W	YIL023C			YDR527W						YLR301W	YBL077W			YOR305W
						YNL088W	YPL125W			YLR154W-C						YPR062W	YCR087W								YLR210W						YBR214W	YJL016W			YIR018W						YDL171C	YHR033W			YPL269W
						YJL004C	YIL063C			YKL021C						YLR388W	YKL196C								YCR066W						YLR258W	YDR144C			YPR061C						YHR114W	YEL013W			YJL016W
						YNL130C	YKL008C			YLR421C						YOR293W	YFL005W								YGL134W						YMR090W	YJL068C			YHR184W						YOL090W	YBL056W			YCR090C
						YGR132C	YLR264W			YKR058W						YLR262C-A	YKL021C								YLR309C						YGL156W	YPR184W			YIL097W						YER093C	YDL052C			YDR485C
						YJL129C	YGL220W			YMR059W						YER133W	YOR312C								YNL109W						YGR248W	YDR380W			YDR461C-A						YLR201C	YPL115C			YGR237C
						YDR367W	YOR094W			YOL018C						YLR435W	YDR002W								YNL294C						YLR134W	YPL036W			YDL005C						YMR152W	YJL080C			YPL152W
						YER053C	YOR357C			YLR460C						YOL109W	YLR175W								YNR045W						YHR092C	YOL129W			YKR078W						YLR256W	YFL007W			YPL259C
						YLR020C	YLR447C			YPR082C						YKL009W	YLR367W								YPL044C						YHR137W	YDL164C			YBR296C						YNL139C	YIL039W			YHR182W
						YLR201C	YGL020C			YPL001W						YMR294W-A	YHR039C-A								Q0075						YMR196W	YDR074W			YGL175C						YAL061W	YLR189C			YDL113C
						YIL148W	YJL070C			YGR131W						YNL110C	YER019C-A								YCR091W						YDR406W	YMR173W-A			YDL231C						YOR069W	YDL025C			YDR420W
						YDL212W	YJL171C			YAL025C						YLR167W	YCR016W								YCR096C						YMR250W	YKL129C			YDL151C						YJL196C	YJL134W			YEL028W
						YJL048C	YJL156C			YGR050C						YAL025C	YML026C								YEL041W						YOL084W	YHR016C			YNR004W						YBR046C	YOR153W			YGR127W
						YER037W	YOR036W			YJR034W						YNL079C	YER117W								YKL099C						YHR096C	YBR026C			YLR051C						YGL040C	YDR430C			YIL010W
						YKL057C	YKR017C			YDL018C						YHR141C	YMR260C								YMR163C						YDL223C	YOR291W			YOL101C						YBL017C	YEL053W-A			YJL176C
						YJL079C	YJL123C			YHR039C-A						YKR014C	YOR369C								YNL279W						YGR088W	YGL006W			YAR050W						YLR328W	YHR103W			YMR023C
						YOR182C	YLR319C			YDL121C						YDR322C-A	YGL103W								YHR118C						YDL222C	YIL101C			YOR252W						YLR179C	YNL134C			YBL113C
						YBL055C	YJR008W			YDR339C						YBL077W	YLR154W-C								YJL023C							YOR185C			YDL197C						YOR136W	YLR088W			YIL084C
						YOR245C	YDL191W			YAL034W-A						YPL090C	YPR132W								YOL054W							YML100W			YGL096W						YLR089C	YNL192W			YLR135W
						YDR399W	YLR167W			YLR147C						YPR187W	YOR089C								YGL175C							YBR214W			YLR070C						YML075C	YGL141W			YLR381W
						YDL015C	YGL087C			YMR090W						YPL146C	YDL136W								YKL028W							YGR043C			YML043C						YBR059C	YBR042C			YMR198W
						YER002W	YLR093C			YJR061W						YBL036C	YGR118W								YEL061C							YBR056W			YOL071W						YHR086W	YIL047C			YNL018C
						YLR287C	YGL231C			YBR242W						YOR234C	YPR062W								YIL092W							YGL156W			YPL242C						YJL020C	YJL097W			YNL122C
						YBR137W	YER126C			YNL011C						YBL028C	YLR388W								YMR147W							YGR248W			YNL294C						YDR457W	YHR114W			YNR004W
						YIL062C	YCL024W			YOR262W						YDR500C	YOR293W								YCR105W							YLR258W			YJR022W						YDR432W	YIL020C			YPL015C
						YGR216C	YOR111W			YGL124C						YNL244C	YLR262C-A								YPL088W							YLR134W			YDL211C						YBR218C	YLR301W			YPR196W
						YPL206C	YNL225C			YHR077C						YNL162W	YKL009W								YKL015W							YHR137W			YMR279C						YDR505C	YER033C			YKR078W
						YBR175W	YJL055W			YJL126W						YGR280C	YER133W								YKL055C							YMR196W			YDL049C						YLR259C	YER093C			YBR067C
						YIL014W	YAR003W			YOR319W						YFR032C-A	YLR435W								YBR156C							YMR250W			YNL227C						YMR145C	YGL027C			YDR080W
						YBR087W	YHR046C			YJL131C						YJL188C	YNL110C								YML077W							YHR092C			YOR346W						YMR092C	YDL171C			YBR117C
						YDR288W	YJL004C			YLR021W						YMR039C	YOL109W								YKL162C							YDR406W			YPL013C						YER070W	YLR201C			YBR278W
						YDL103C	YDR378C			YLR323C						YNL017C	YMR294W-A								YHR081W							YHR096C			YML015C						YBL069W	YOL090W			YDL058W
						YHR110W	YJL129C			YER007W						YKL122C	YAL025C								YOR205C							YDL223C			YDL010W						YHR028C	YMR152W			YDL138W
						YKL046C	YNL088W			YLR152C						YLR062C	YLR167W								YPR157W							YGR088W			YBR233W-A						YDL019C	YLR256W			YDL214C
						YDL018C	YNL130C			YDR184C						YKL172W	YKR014C								YLL060C							YDL222C			YKL208W						YDR545W	YNL139C			YDR029W
						YDL192W	YDR367W			YLR102C						YER002W	YHR141C								YGR099W							YPL250W-A			YLR364W						YLR467W	YJL196C			YDR248C
						YGL200C	YLR020C			YNL077W						YER126C	YNL079C								YMR001C							YMR090W			YPL253C						YOR396W	YOR069W			YEL016C
						YHR022C	YGR132C			YJL161W						YLR154W-F	YDR322C-A								YDR332W							YOL084W			YLR390W						YLR109W	YBR046C			YGL018C
						YJL104W	YDL212W			YOR118W						YJL148W	YBL077W								YEL003W										YMR036C						YMR302C	YLR328W			YGR041W
						YLR290C	YNL160W			YGR150C						YKL082C	YPL146C								YJR134C										YIL050W						YDL145C	YOR231W			YGR217W
						YBR256C	YER037W			YGR114C						YJL189W	YPR187W								YMR039C										YLR322W						YDL015C	YGL040C			YGR274C
						YDL027C	YBL055C			YPR010C-A						YLR051C	YPL090C								YMR294W-A										YDR126W						YBL007C	YBL017C			YJL209W
						YPR127W	YJL048C			YBR255W						YDL153C	YBL036C								YPR120C										YDR314C						YFR021W	YOR136W			YKL034W
						YLR148W	YKL057C			YDR177W						YHR081W	YBL028C								YOR368W										YGL024W						YLR028C	YLR179C			YKL201C
						YFL045C	YIL148W			YNL039W						YFR001W	YOR234C								YNL191W										YHR143W-A						YJL041W	YAL061W			YKR063C
						YNL157W	YLR201C			YGL161C						YGL029W	YNL244C								YDR478W										YKL137W						YDR293C	YLR089C			YLL066C
						YBR192W	YOL122C			YIR016W						YLR154W-E	YDR500C								YGL226W										YDL053C						YJL158C	YHR086W			YLR242C
						YEL003W	YER002W			YDR514C						YLR154C-H	YGR280C								YJL090C										YOR358W						YKL008C	YBR059C			YML041C
						YMR218C	YJL079C			YBR254C						YLR156C-A	YNL162W								YKL095W										YGR008C						YOR155C	YML075C			YMR018W
						YPR113W	YOR182C			YLR016C						YLR157C-C	YFR032C-A								YDR108W										YDR332W						YHR042W	YMR209C			YMR097C
						YDR191W	YER053C			YLR325C						YLR159C-A	YJL188C								YOR279C										YLR276C						YGL173C	YDR505C			YOR043W
						YJR123W	YLR287C			YPR131C							YMR039C								YOR262W										YMR268C						YMR259C	YKR049C			YPL097W
						YNL048W	YDR399W			YGR029W							YNL017C								YGR265W										YNL122C						YGR281W	YJL020C			YPR011C
						YGL147C	YDL015C			YPL255W							YKL122C								YBR148W										YOL077W-A						YGR177C	YDR457W			YDL044C
						YCL011C	YOR245C			YPR057W							YKL172W								YPR056W										YBL075C						YLR250W	YLR259C			YMR291W
						YDR473C	YBR137W			YGL085W							YLR154W-F								YDR068W										YBL103C						YMR012W	YDR432W			YLR189C
						YML055W	YBR175W			YKL040C							YER126C								YNL173C										YNR042W						YJR091C	YBL069W			YNR023W
						YPR176C	YGR216C			YNL144C							YER002W								YCR095C										YBL021C						YML059C	YDR525W-A			YGR281W
						YIL002W-A	YHR022C			YJL096W							YLR062C								YDL104C										YBR163W						YMR278W	YBR218C			YBR253W
						YBR111C	YIL014W			YJL057C							YJL148W								YGR129W										YER165C-A						YDL236W	YHR028C			YDR403W
						YML022W	YIL062C			YJL155C							YKL082C								YER051W										YOR334W						YAL017W	YMR092C			YGR265W
						YGR263C	YPL206C			YHL035C							YJL189W								YOR056C										YHR191C						YBR241C	YDR545W			YNL047C
						YPR172W	YKL046C			YBL021C							YLR051C								YBR193C										YMR028W						YPR198W	YLR467W			YOL014W
						YDR168W	YDR288W			YCR015C							YDL153C								YDR357C										YGL050W						YML079W	YOR396W			YLL055W
						YPR147C	YJL104W			YHR072W-A							YHR081W								YMR198W										YKL023W						YNL280C	YBR139W			YPL018W
						YMR092C	YDL103C			YDR478W							YFR001W								YNL286W										YPL233W						YHR186C	YFR021W			YDL177C
						YFR004W	YDL018C			YIL127C							YGL029W								YPR186C										YDR499W						YCR012W	YDL015C			YDR088C
						YNR061C	YHR110W			YNL089C							YLR154W-E								YBL014C										YOL046C						YBR169C	YMR145C			YHL006W-A
						YBR042C	YDL192W			YBR228W							YLR154C-H								YBL052C										YGR091W						YDL042C	YMR302C			YKL098W
						YIL110W	YBR087W			YJL140W							YLR156C-A								YBL093C										YFL049W						YIL155C	YBL007C			YPR160W
						YKR014C	YDL027C			YBL018C							YLR157C-C								YFR015C										YNL314W						YDR206W	YDL019C			YBL105C
						YDL067C	YLR290C			YOR285W							YLR159C-A								YJL046W										YJR100C						YER011W	YLR028C			YDR179W-A
						YGR267C	YLR148W			YPL149W															YMR032W										YKL222C						YKR093W	YJL041W			YDR521W
						YPR118W	YGL200C			YGR072W															YNL180C										YER140W						YDR283C	YLR109W			YLR130C
						YIL008W	YBR256C			YLR309C															YDR034C-A										YKR091W						YDR122W	YER070W			YBR197C
						YMR039C	YPR127W			YNL097C															YEL018W										YLR099W-A						YKR054C	YDL145C			YDR074W
						YKL021C	YNL157W			YLR204W															YML097C										YKR004C						YBR115C	YDR293C			YGR043C
						YBR183W	YDR191W			YMR153C-A															YOL069W										YHR118C						YOR160W	YKL008C			YHR101C
						YOR021C	YOR215C			YOR040W															YCR010C										YAR018C						YBR235W	YOR155C			YLR141W
						YNL200C	YMR218C			YOL042W															YBR044C										YDR494W						YIL062C	YMR259C			YLR253W
						YKR088C	YFL045C			YDL161W															YCR038C										YJR087W						YMR247C	YHR042W			YMR070W
						YBR302C	YBR192W			YJR054W															YJL085W										YKL075C						YCL009C	YGR177C			YGR190C
						YML132W	YPR113W			YDR486C															YLR238W										YBR259W						YMR216C	YGL173C			YLR001C
						YBR214W	YEL003W			YGL231C															YPR070W										YBL085W						YKL182W	YGR281W			YAR027W
						YGL123W	YNL048W			YLR358C															YDR056C										YNL155W						YOL087C	YJL158C			YHR199C
						YPL090C	YJR123W			YPR122W															YLR408C										YOR036W						YMR079W	YLR250W			YJL170C
						YHL003C	YML022W			YCR089W															YGR286C										YNL086W						YLR354C	YMR012W			YLR382C
						YML070W	YIL002W-A			YDL197C															YIR010W										YGR182C						YLR386W	YJR091C			YNL252C
						YGR248W	YCL011C			YDR110W															YPL253C										YGL146C						YLR440C	YML059C			YPL006W
						YOR075W	YML055W			YDR302W															YAL034W-A										YGR243W						YGL068W	YBR241C			YPR122W
						YHR181W	YGR263C			YKL209C															YGL229C										YML114C						YGR038W	YNL127W			YDR495C
						YOR167C	YDR473C			YDR249C															YIL098C										YNR040W						YPL231W	YMR278W			YCR006C
						YDR110W	YPR176C			YGR075C															YNL142W										YOL116W						YLR166C	YML079W			YBL095W
						YKL041W	YGL147C			YLR273C															YER175C										YLL003W						YGL197W	YPR198W			YDR545W
						YPR069C	YFR004W			YBL001C															YAL028W										YBL071W-A						YNR017W	YDL236W			YER148W-A
						YDR531W	YNR061C			YHR209W															YDR460W										YBR095C						YCR088W	YDL042C			YGL059W
						YGL207W	YDR168W			YLL055W															YOR249C										YER173W						YKL213C	YAL017W			YGL123C-A
						YBR006W	YBR111C			YML026C															YDL155W										YLR210W						YAR042W	YHR186C			YGL251C
						YOL129W	YMR092C			YPL117C															YAL059W										YLR238W						YER113C	YNL280C			YGR134W
						YNL323W	YBR042C			YLR078C															YAL032C										YDL216C						YLL048C	YLR361C			YIL056W
						YPL139C	YPR147C			YNL253W															YBL103C										YDR183W						YML085C	YIL155C			YIL131C
						YDR235W	YPR172W			YDR222W															YHR184W										YLL007C						YJL129C	YDR206W			YLR107W
						YBR024W	YIL110W			YOR103C															YKL171W										YIL092W						YMR231W	YCR012W			YLR467W
						YLL058W	YIL008W			YPR062W															YMR096W										YHL002C-A						YHL017W	YFR038W			YMR041C
						YDR005C	YKR014C			YGL256W															YOR060C										YBR016W						YOR329C	YDR122W			YNL095C
						YHR039C	YGR267C			YKR063C															YDR246W										YDR462W						YDR164C	YBR169C			YNL098C
						YDR272W	YDL067C			YJR102C															YDR152W										YGL249W						YCR077C	YDR283C			YNL100W
						YHR072W-A	YKL021C			YMR257C															YDR173C										YKR020W						YPL085W	YKR093W			YOL138C
						YDR079W	YMR039C			YMR060C															YKL119C										YNL327W						YDR307W	YBR115C			YOR266W
						YDR167W	YOR021C			YFL034C-A															YGL071W										YOR056C						YBL035C	YBR052C			YOR396W
						YGL068W	YPR118W			YMR081C															YMR197C										YOR305W						YOR321W	YKR054C			YPL130W
						YJR087W	YBR183W			YMR158W															YML071C										YOR331C						YCR067C	YBR235W			YPL189C-A
						YOR234C	YBR302C			YNL147W															YNL245C										YMR257C						YAL001C	YOR160W			YDL209C
						YDR139C	YML132W			YPL107W															YOL071W										YDR242W						YKL068W	YIL062C			YNL176C
						YHL015W	YKR088C			YDR313C															YBR257W										YDR246W						YGL157W	YMR247C			YGR161W-C
						YFL046W	YPL090C			YPR147C															YER034W										YGR150C						YPR032W	YER011W			YKR064W
						YER021W	YNL200C			YDR482C															YPR047W										YDR179C						YNL264C	YCL009C			YPL030W
						YBR154C	YHL003C			YKR051W															YFL049W										YPL216W						YKL085W	YIL014W			YDR145W
						YKR026C	YGL123W			YLR287C															YGR239C										YPR199C						YMR015C	YHR104W			YFL049W
						YHR094C	YHR181W			YDL027C															YOL034W										YBL093C						YLR100W	YMR216C			YDR113C
						YDL050C	YDR110W			YER051W															YIL144W										YHR081W						YIL109C	YMR079W			YBR119W
						YIL138C	YOR075W			YKR102W															YBL010C										YKL149C						YHR113W	YGL068W			YBR203W
						YGR183C	YOR167C			YKR069W															YGL247W										YAL047C						YCR093W	YLR386W			YMR140W
						YMR173W	YKL041W			YOL113W															YDR288W										YDR160W						YIL121W	YGR038W			YOL043C
						YKR057W	YPR069C			YDL076C															YLR435W										YGL072C						YDR276C	YLR354C			YPL228W
						YHR005C-A	YBR214W			YLR025W															YEL005C										YGL143C						YHR199C	YOL087C			YIL129C
						YIL103W	YML070W			YDL142C															YPL191C										YGR099W						YIL023C	YLR440C			YML057C-A
						YPL237W	YDR531W			YKR085C															YBR259W										YNL009W						YNR030W	YOL012C			YPL158C
						YOR332W	YBR006W			YOR216C															YCL059C										YDL130W-A						YKR089C	YNR017W			YBR215W
						YDR515W	YGL207W			YGL103W															YER002W										YKL028W						YOL075C	YLR166C			YKR102W
						YOR288C	YGR248W			YDR087C															YOL116W										YNL042W						YKL038W	YKL182W			YGR104C
						YNL215W	YBR024W			YJR099W															YBR130C										YLR455W						YML103C	YGL197W			YKL105C
						YKR070W	YPL139C			YMR003W															YDR183W										YBR282W						YNR047W	YIR036C			YML099C
						YCL038C	YNL323W			YMR239C															YGL024W										YER029C						YOR161C	YCR088W			YBL010C
						YNL010W	YDR235W			YPL051W															YKL138C										YCL051W						YBR096W	YKL213C			YDR014W
						YOR089C	YDR005C			YDR366C															YPR133C										YDR140W						YHR045W	YER113C			YER173W
						YOR289W	YHR072W-A			YBR268W															YHL031C										YGR030C						YGL206C	YJL129C			YDR498C
						YLR051C	YLL058W			YGL086W															YJL205C										YGR146C						YPR091C	YAR042W			YHL020C
						YKL033W-A	YHR039C			YGR219W															YNL166C										YNL328C						YDR135C	YPL231W			YIR003W
						YBL035C	YDR272W			YOR386W															YGR238C										YCR038C						YMR071C	YLL048C			YMR207C
						YMR210W	YOL129W			YHR012W															YNL014W										YDL200C						YHL030W	YML085C			YDR073W
						YDR514C	YDR079W			YDR115W															YJR043C										YOL053W						YPL274W	YMR231W			YDR317W
						YGL030W	YDR167W			YGR106C															YPL170W										YOR308C						YGR055W	YHL017W			YDR435C
						YHR012W	YGL068W			YPR025C															YDR356W										YOR309C						YPL023C	YOR329C			YJL089W
						YER099C	YJR087W			YAR028W															YHR192W										YNL093W						YOL057W	YDR164C			YML038C
						YLR406C	YOR234C			YFR027W															YJR100C										YDR020C						YER119C	YCR077C			YDL239C
						YML024W	YER021W			YGL152C															YMR282C										YER051W						YOL151W	YOR321W			YDL013W
						YDR468C	YDR139C			YNL249C															YNL151C										YMR066W						YDR533C	YCR067C			YDL079C
						YML056C	YBR154C			YDR125C															YPR018W										YMR287C						YAL051W	YDR307W			YDR130C
						YMR071C	YKR026C			YDR137W															YPR038W										YDR056C						YHR165C	YPL085W			YEL067C
						YLR421C	YFL046W			YDR305C															YBR167C										YHR077C						YOL111C	YKL068W			YGR222W
						YNL070W	YDL050C			YGR151C															YDR139C										YJL078C						YKR027W	YAL001C			YHR078W
						YMR311C	YHL015W			YBR270C															YDR275W										YKR035C						YGL151W	YGL157W			YJL094C
						YBR058C-A	YIL103W			YDL044C															YOR036W										YNL072W						YJR051W	YBL035C			YLR047C
						YOR063W	YKR057W			YKL149C															YLR070C										YOL018C						YHR094C	YPR032W			YOR013W
						YJL001W	YMR173W			YPL010W															YCR049C										YPR018W						YPR028W	YNL264C			YPR093C
						YML128C	YPL237W			YDR317W															YDL231C										YDL107W						YGL195W	YMR015C			YJL049W
						YOR096W	YHR005C-A			YMR009W															YDR014W										YDL121C						YCL038C	YLR100W			YMR007W
						YJR057W	YGR183C			YPR187W															YLR233C										YDR512C						YML072C	YKL085W			YOL075C
						YHR081W	YDR515W			YIL016W															YIR002C										YEL019C						YLR209C	YIL109C			YPR184W
						YOL127W	YCL038C			YGR089W															YAR031W										YKL055C						YBR004C	YHR113W			YDR268W
						YDL236W	YIL138C			YBR089C-A															YER059W										YNL232W						YDR367W	YHR199C			YML068W
						YJR010C-A	YHR094C			YJL048C															YPR188C										YLR151C						YBR225W	YCR093W			YPR026W
						YJL006C	YOR288C			YPR085C															YDL213C										YJR052W						YML117W	YIL121W			YDR123C
						YKR042W	YOR332W			YEL077C															YDR485C										YPL132W						YPL154C	YIL023C			YPL071C
						YJL148W	YNL215W			YBL040C															YHR052W-A										YOR205C						YNR016C	YNR030W			YDL076C
						YJR088C	YNL010W			YJL072C															YHR054W-A										YPR186C						YGR220C	YKL038W			YCR023C
						YDR137W	YLR051C			YJL006C															YKR096W										YKR098C						YGR254W	YOL075C			YDR026C
						YDL166C	YOR089C			YBR194W															YDL074C										YLR018C						YMR130W	YKR089C			YDR536W
						YOR016C	YKR070W			YDL206W															YLL004W										YPR107C						YLL023C	YML103C			YJR135C
						YNR020C	YKL033W-A			YDR235W															YHR048W										YPR133C						YDL035C	YNR047W			YNL063W
						YOR118W	YOR289W			YGL242C															YLR227C										YNL038W						YJR117W	YDR539W			YNL315C
						YDL164C	YDR514C			YKL009W															YHR187W										YIR004W						YDR093W	YDR276C			YER163C
						YIL136W	YBL035C			YNR004W															YIL068W-A										YLR067C						YEL047C	YOR161C			YMR193C-A
						YDR415C	YER099C			YPR030W															YOR073W										YOR172W						YGL065C	YBR096W			YBL106C
						YDL219W	YGL030W			YOR266W															YBR290W										YMR263W						YDR141C	YHR045W			YLL018C-A
						YDR392W	YHR012W			YIL027C															YJR122W										YGL164C						YML078W	YMR071C			YBR276C
						YJL068C	YMR210W			YJR012C															YML003W										YNL036W						YNL044W	YPR091C			YCL067C
						YLR107W	YML056C			YDR479C															YML114C										YGR188C						YOR070C	YDR135C			YCR020W-B
						YJR025C	YML024W			YMR316W															YGR002C										YHL035C						YOL060C	YPL274W			YCR039C
						YER112W	YLR406C			YML050W															YMR005W										YIL008W						YJR040W	YGL206C			YNL261W
						YOR277C	YDR468C			YLL060C															YMR290W-A										YKR086W						YGR036C	YOR173W			YLR115W
						YLR250W	YMR071C			YJR039W															YFR035C										YNL191W						YJL212C	YGR055W			YGR133W
						YDL125C	YOR386W			YGR005C															YGR005C										YDR424C						YAL040C	YHL030W			YPR136C
						YGL031C	YNL070W			YDL098C															YDR079W										YOL069W						YLR001C	YPL023C			YPL016W
						YML004C	YLR421C			YGL070C															YHR131C										YJL046W						YLR144C	YPR049C			YFL029C
						YOR293W	YBR058C-A			YMR087W															YBR165W										YOL117W						YLR270W	YOL111C			YOR313C
						YJL189W	YMR311C			YNR074C															YDL105W										YGR070W						YOR002W	YER119C			YBL067C
						YGR271C-A	YOR063W			YDR067C															YLR009W										YNL166C						YOR034C	YOL057W			YER022W
						YHR010W	YJL001W			YFL049W															YDR527W										YHR187W						YKR046C	YAL051W			YMR285C
						YDL137W	YJR010C-A			YDR043C															YKL167C										YGR278W						YCL040W	YHR165C			YOL073C
						YNL162W	YJR057W			YNL206C															YPR084W										YCL016C						YPR191W	YOL151W			YOR230W
						YMR188C	YDL236W			YNL070W															YDR419W										YPL094C						YIL048W	YDR533C			YOR331C
						YBR026C	YHR081W			YDR223W															YGL086W										YBR156C						YLR087C	YKR027W			YOR389W
						YPL117C	YJL006C			YJL123C															YIL050W										YDL105W						YPR164W	YGL151W			YDL190C
						YMR157C	YJL148W			YHR085W															YKL053W										YNL252C						YLR371W	YJR051W			YGR075C
						YML067C	YOR096W			YMR052W															YKL172W										YJL118W						YHR039C	YGL104C			YPR192W
						YDR051C	YOL127W			YFL017W-A															YPL042C										YJR071W						YOL155C	YPR043W			YCL063W
						YHR201C	YML128C			YKL217W															YPR006C										YMR117C						YNL297C	YLR209C			YDR274C
						YOL149W	YDL166C			YOL009C															YBR146W										YJR056C						YDL195W	YDR295C			YKL126W
						YBR022W	YJR088C			YNL177C															YCR064C										YDR288W						YDR516C	YHR112C			YMR139W
						YDL007W	YKR042W			YPL124W															YLR257W										YKL052C						YKL051W	YCL038C			YMR283C
						YGL185C	YDR137W			YBR294W															YDR160W										YIR005W						YMR099C	YHR094C			YNL014W
						YFL028C	YOR016C			YIL156W-B															YPR124W										YML076C						YBL045C	YBR004C			YNL331C
						YDL136W	YOR118W			YIL159W															YDR462W										YKR063C						YJR013W	YGL195W			YNR075W
						YHR138C	YNR020C			YOR182C															YDL001W										YPR006C						YOL098C	YML072C			YOR137C
						YOL090W	YDR415C			YLR292C															YNL311C										YPR038W						YDR216W	YGR258C			YJL106W
						YFL017C	YLR107W			YPL216W															YPL248C										YLR327C						YLR034C	YLR362W			YHL029C
						YDR302W	YDL219W			YDL091C															YGL176C										YCL032W						YLL015W	YDR367W			YIR028W
						YNL244C	YDR392W			YFR033C															YNR040W										YDR444W						YIL040W	YPR028W			YDR444W
						YCR028C-A	YIL136W			YKL154W															YBR279W										YMR123W						YHL008C	YBR225W			YER088C-A
						YPL220W	YER112W			YMR193W															YHL024W										YGL045W						YJR138W	YML117W			YJL013C
						YBR257W	YDL164C			YML041C															YJR083C										YLR135W						YGL084C	YCR021C			YJL093C
						YKL174C	YJL068C			YOR274W															YOR114W										YDL061C						YPR154W	YOR144C			YJR083C
						YPR198W	YJR025C			YHR167W															YDR317W										YER180C-A						YIR037W	YGR220C			YJR127C
						YGL159W	YOR277C			YNL081C															YIL096C										YPL183W-A						YJL079C	YMR130W			YNL076W
						YFL017W-A	YLR250W			YBR085C-A															YOR351C										YLR079W						YIL108W	YPL154C			YPL088W
						YBL090W	YDL125C			YLR107W															YDR369C										YOR287C						YLR389C	YLL023C			YLL015W
						YDR327W	YGL031C			YOR281C															YOL117W										YOR367W						YBR243C	YDR093W			YHR195W
						YKL045W	YOR293W			YDR372C															YDR200C										YAL009W						YOL081W	YJR117W			YBL022C
						YIL156W-B	YGR271C-A			YKL079W															YOR281C										YAL028W						YMR237W	YDL035C			YCL016C
						YHL017W	YJL189W			YGL110C															YJR052W										YBR268W						YHR099W	YGL065C			YHR186C
						YKL053C-A	YML004C			YMR023C															YLR290C										YGL053W						YJR127C	YNR016C			YIL059C
						YML108W	YPL117C			YPR006C															YOR215C										YJR110W						YKL165C	YNL044W			YJL029C
						YDR427W	YHR010W			YER139C															YBR111W-A										YLR142W						YMR119W	YEL047C			YJR136C
						YHR063W-A	YMR188C			YNL326C															YOR075W										YGR161C						YGR172C	YML078W			YKR022C
						YGR063C	YNL162W			YGR262C															YDL058W										YMR201C						YMR178W	YOR070C			YMR315W
						YMR260C	YMR157C			YMR306W															YLR239C										YCR082W						YLR454W	YDR141C			YOR158W
						YNL044W	YDL137W			YKR053C															YNL117W										YKL015W						YHR047C	YOL060C			YOR296W
						YDR307W	YML067C			YLR394W															YPL024W										YOR279C						YCR061W	YGR036C			YHR077C
						YPR130C	YDR051C			YPR056W															YDR291W										YBL054W						YBL101C	YAL040C			YJR149W
						YPL142C	YHR201C			YKL144C															YNL230C										YER034W						YAL031C	YJL212C			YKL121W
						YAR027W	YBR026C			YLR108C															YOR212W										YLR185W						YCR065W	YJR040W			YOR124C
						YPL271W	YBR022W			YML067C															YAL054C										YPR148C						YPL087W	YLR001C			YDR541C
						YOR309C	YOL149W			YNL214W															YAL009W										YHR150W						YOR086C	YLR144C			YLR005W
						YHR141C	YDL007W			YDR392W															YLR151C										YBL029W						YGL167C	YOR034C			YLR440C
						YIL020C	YGL185C			YKR029C															YGL103W										YDR087C						YNL219C	YOR002W			YOR269W
						YPL273W	YHR138C			YJR134C															YDR176W										YJL131C						YPL184C	YKR046C			YDR356W
						YER133W	YFL028C			YGR187C															YKL063C										YNL286W						YDL135C	YGL160W			YGL143C
						YMR284W	YNL244C			YOR213C															YNL164C										YML071C						YBR054W	YDR069C			YKL048C
						YKL219W	YGL159W			YGL020C															YPL239W										YJR061W						YBR229C	YLR270W			YMR216C
						YNL194C	YDL136W			YDR356W															YLR014C										YBL010C						YER044C	YBR204C			YOR087W
						YOR383C	YFL017C			YIL148W															YLR102C										YCR095C						YBR159W	YGR254W			YOL136C
						YNL312W	YPL220W			YNR070W															YDR236C										YER041W						YPL040C	YPR191W			YPL133C
						YBR054W	YDR302W			YFR042W															YPL065W										YDR311W						YJL060W	YOL003C			YDL005C
						YIL076W	YFL017W-A			YHR015W															YKR013W										YMR280C						YOR109W	YPR164W			YKL161C
						YGL156W	YKL174C			YOL116W															YLR243W										YKL136W						YLR024C	YIL048W			YCL026C-A
						YCL042W	YPR198W			YDR020C															YMR268C										YDR181C						YPR020W	YLR087C			YCR063W
						YNL115C	YCR028C-A			YCR071C															YNL032W										YLR423C						YJR073C	YHR039C			YDR126W
						YPL197C	YBR257W			YDR471W															YPL175W										YNR045W						YNL320W	YLR371W			YGR050C
						YJL136C	YOL090W			YBL086C															YBR163W										YBR257W						YDR368W	YCL040W			YGR166W
						YMR178W	YDR327W			YDL147W															YMR279C										YIR010W						YJR131W	YNL297C			YIL014W
						YAR028W	YBL090W			YPL257W															YMR319C										YDR007W						YLR130C	YKL051W			YIR018W
						YPR087W	YKL053C-A			YMR034C															YJL155C										YDL099W						YNL241C	YMR099C			YKR062W
						YLR301W	YIL156W-B			YNL213C															YBR071W										YOR281C						YCR048W	YDL195W			YLR119W
						YIL027C	YML108W			YLR443W															YBR107C										YDR227W						YNL138W	YDR516C			YLR191W
						YNL100W	YHL017W			YOL083W															YOR020W-A										YER045C						YJL141C	YBL045C			YMR158W
						YJR073C	YKL045W			YOR238W															YNL042W										YGL101W						YMR006C	YLR382C			YMR252C
						YML001W	YNL044W			YOR261C															YJL025W										YPL191C						YMR272C	YGR166W			YOR148C
						YPR098C	YDR427W			YLR242C															YKL052C										YOR052C						YPR172W	YNL242W			YOR154W
						YJL179W	YGR063C			YER048W-A															YBR255W										YGR174C						YOL011W	YJR013W			YPL024W
						YPL010W	YHR063W-A			YCR087W															YJL168C										YDR008C						YNL321W	YDR216W			YBR062C
						YGR019W	YPR130C			YDL006W															YGL101W										YGL042C						YGR216C	YOL098C			YFL003C
						YDR279W	YMR260C			YPL213W															YJR112W										YPR084W						YBR126C	YLR034C			YGR076C
						YDR366C	YDR307W			YKL053C-A															YER029C										YDR317W						YAL060W	YIL040W			YMR279C
						YJL188C	YPL142C			YER054C															YNL079C										YJL153C						YKL157W	YLL015W			YNL277W
						YOR103C	YOR309C			YMR218C															YDR325W										YJR039W						YPR127W	YOL155C			YPR107C
						YGL168W	YPL271W			YJR032W															YGL121C										YMR193W						YHR216W	YJR138W			YDR451C
						YOR261C	YAR027W			YNR007C															YJR118C										YNR024W						YDL224C	YHL008C			YDL115C
						YER044C	YPL273W			YLR104W															YGL222C										YPL193W						YDL022W	YPR154W			YGR009C
						YLR367W	YIL020C			YER022W															YJL057C										YDL076C						YLL026W	YGL084C			YDR111C
						YLR262C	YHR141C			YPR130C															YDR052C										YLR283W						YNL262W	YBR276C			YER132C
						YER117W	YER133W			YJL035C															YDR361C										YDL044C						YKL148C	YIR037W			YHL010C
						YNR055C	YOR383C			YJL164C															YDR112W										YOR022C						YIR038C	YIL108W			YHR091C
						YGR088W	YKL219W			YOL114C															YOR363C										YNL311C						YOR347C	YLR389C			YJL066C
						YKR068C	YMR284W			YPR132W															YDL030W										YOL128C						YLR176C	YBR243C			YJR043C
						YDL065C	YNL194C			YIL120W															YDR132C										YOR328W						YBR140C	YGR098C			YJR133W
						YER012W	YNL312W			YKL087C															YLR142W										Q0045						YKL215C	YJL079C			YKL198C
						YBL036C	YBR054W			YOR080W															YDL216C										YNL110C						YDL141W	YOL081W			YNL086W
						YOR283W	YCL042W			YML077W															YJL107C										YNL173C						YCL057W	YMR237W			YOL141W
						YAL008W	YIL076W			YHR004C															YLR363W-A										YPL277C						YDR127W	YDR027C			YOR059C
						YER009W	YJR073C			YDL157C															YLR108C										YDL104C						YCR090C	YJR127C			YPR201W
						YGR141W	YHR096C			YOL054W															YOR194C										YDR151C						YLR304C	YHR099W			YDR387C
						YBL040C	YNL115C			YDR386W															YNL232W										YDR316W						YFR053C	YKL165C			YER130C
						YGR284C	YPL197C			YGL226W															YGR287C										YER115C						YML056C	YGR172C			YAL061W
						YLR126C	YJL136C			YCL035C															YKR095W										YFR022W						YCR030C	YMR119W			YOR098C
						YDR322C-A	YGL156W			YOL043C															YKR097W										YHR088W						YGL161C	YMR178W			YDL073W
						YML063W	YMR178W			YGL165C															YGL169W										YIL127C						YPL246C	YCR061W			YJL058C
						YMR090W	YPR087W			YKL058W															YOR266W										YJL025W						YPR026W	YPL008W			YKL154W
						YOR312C	YIL027C			YPL205C															YDL076C										YJL085W						YCR069W	YBL101C			YMR255W
						YPR100W	YAR028W			YPL227C															YML118W										YLR009W						YOR317W	YHR047C			YOR365C
						YBR062C	YML001W			YDR065W															YNL206C										YLR098C						YOL129W	YLR454W			YKL095W
						YLR104W	YLR301W			YDL231C															YNL231C										YLR408C						YJR121W	YAL031C			YKR099W
						YPR166C	YNL100W			YHR001W-A															YPL233W										YLR456W						YNL160W	YCR065W			YFL026W
						YMR130W	YPL010W			YFR031C															YDL149W										YNL095C						YGR209C	YGL167C			YJR003C
						YDL115C	YJL179W			YMR029C															YKR006C										YOR215C						YLL028W	YNL219C			YNL188W
						YKR074W	YDR279W			YGR034W															YEL019C										YOR380W						YJL002C	YPL087W			YNL295W
						YBR004C	YDR366C			YGR070W															YDR065W										YPR188C						YML128C	YOR086C			YOR190W
						YJL049W	YPR098C			YLR276C															YGL143C										YCL055W						YDL093W	YPL184C			YGL021W
						YGL091C	YGL168W			YPL231W															YNL012W										YBR228W						YDR059C	YDL135C			YOL042W
						YMR230W	YER044C			YDR044W															YKR051W										YML077W						YGL037C	YER044C			YBR284W
						YBR166C	YGR019W			YLR103C															YLR018C										YEL003W						YML070W	YBR054W			YDR369C
						YDL157C	YOR261C			YDL067C															YML037C										YKL214C						YMR170C	YBR229C			YGR042W
						YIL040W	YJL188C			YOL017W															YPR082C										YPR070W						YLR178C	YBR159W			YBR076C-A
						YNL084C	YOR103C			YIL064W															YLR003C										YBR239C						YGL187C	YJL060W			YDR296W
						YNL222W	YLR367W			YMR126C															YPL138C										YJR111C						YBL064C	YPR020W			YLL007C
						YKL056C	YLR262C			YOR131C															YDR130C										YKL001C						YAL005C	YJR073C			YLR400W
						YER074W-A	YER117W			YDR080W															YDR423C										YLR257W						YJR001W	YLR024C			YNL042W
						YGR106C	YNR055C			YMR061W															YHR136C										YNR049C						YDL217C	YOR109W			YPR157W
						YGR034W	YKR068C			YDL008W															YJR054W										YPR056W						YJR033C	YNL320W			YBR103W
						YPL225W	YER012W			YEL044W															YKL003C										YIR002C						YLL031C	YJL019W			YDL129W
						YLR043C	YDL065C			YGL102C															YDL065C										YDR495C						YKL203C	YJR131W			YDL185C-A
						YMR251W-A	YOR283W			YKR071C															YER142C										YCR024C						YJL171C	YDR368W			YFL052W
						YBL026W	YBL036C			YPL088W															YGR147C										YER059W						YDR433W	YLR130C			YGR091W
						YOR369C	YPR028W			YJL184W															YKR099W										YGL237C						YAL008W	YCR048W			YHR023W
						YGR232W	YAL008W			YMR014W															YML006C										YGR044C						YDR111C	YNL241C			YJL046W
						YDR068W	YGR088W			YBL043W															YNL022C										YOR275C						YHR054C	YPL040C			YKL220C
						YLR078C	YER009W			YHR063W-A															YOR315W										YPL146C						YJL172W	YJL141C			YMR263W
						YCR021C	YGR141W			YNL258C															YHR182W										YJL062W-A						YDR453C	YMR006C			YMR266W
						YAR008W	YLR126C			YOL152W															YGR102C										YLR261C						YLR422W	YMR272C			YOR083W
						YLR166C	YBL040C			YMR157C															YJL180C										YGL127C						YLR345W	YDR089W			YPL272C
						YLR198C	YDR322C-A			YDR255C															YPL057C										YGL113W						YER053C	YNL138W			YCR020C
						YLR076C	YGR284C			YPL003W															YNL143C										YOR212W						YPR147C	YOL011W			YDL176W
						YCR090C	YML063W			YLR417W															YJR053W										YGR222W						YOR383C	YNL321W			YDR263C
						YOR143C	YPR100W			YFR011C															YNL167C										YIL002W-A						YAL058W	YGR216C			YDR479C
						YJL031C	YOR312C			YBR073W															YJR003C										YCR097W						YML054C	YPR127W			YER097W
						YKL058W	YLR104W			YDR094W															YBL088C										YLR267W						YDR470C	YHR216W			YIL055C
						YDL153C	YBR062C			YML005W															YDR007W										YPL026C						YGR199W	YLL026W			YIL144W
						YDR196C	YMR090W			YCR005C															YGL098W										YLR003C						YDR100W	YDL224C			YGR184C
						YML062C	YMR130W			YDR396W															YJL062W-A										YOR075W						YML120C	YKL157W			YCR044C
						YDR447C	YPR166C			YDL010W															YMR168C										YCR066W						YHR204W	YBR126C			YGR112W
						YHL034W-A	YDL115C			YGL174W															YMR194W										YJR147W						YPL006W	YAL060W			YIL066C
						YGL161C	YBR004C			YHR053C															YAL062W										YJR053W						YKL103C	YDL022W			YPR070W
						YOR253W	YKR074W			YHR055C															YOR238W										YGL176C						YJR137C	YNL262W			YAL056W
						YLR441C	YJL049W			YCR036W															YIL013C										YIR015W						YIL124W	YPR172W			YJR013W
						YOR006C	YGL091C			YDR399W															YHR195W										YML097C						YMR304W	YKL148C			YJR122W
						YNL259C	YBR166C			YCR066W															YOL158C										YOR262W						YOR118W	YIR038C			YLR443W
						YNL147W	YDL157C			YCR098C															YHR023W										YKR006C						YJR066W	YDL141W			YJR154W
						YBL018C	YMR230W			YNL259C															YER045C										YDR236C						YCR032W	YBR140C			YLR166C
						YHR054C	YIL040W			YKR100C															YBR055C										YGL041W-A						YKL168C	YKL215C			YBL107C
						YER042W	YNL222W			YML094W															YER162C										YMR126C						YOR230W	YCL057W			YER045C
						YBR164C	YNL084C			YCR076C															YMR133W										YGR286C						YOR297C	YML056C			YGL257C
						YHR121W	YER074W-A			YIR002C															YBL054W										YDR130C						YBR220C	YDR127W			YIL121W
						YBR159W	YKL056C			YLL014W															YDR004W										YOR295W						YNL100W	YLR304C			YJR078W
						YHL047C	YGR034W			YLR289W															YDR444W										YCR083W						YMR113W	YLR176C			YPL109C
						YIL111W	YPL225W			YLR367W															YFR042W										YMR262W						YDR456W	YCR030C			YFR015C
						YNL150W	YGR106C			YPR176C															YPR148C										YJR108W						YKL100C	YGR071C			YDR076W
						YGR199W	YMR251W-A			YIR011C															YDL107W										YFL031W						YGR141W	YOR347C			YBL029W
						YBR096W	YBL026W			YBL106C															YOR017W										YLR438C-A						YMR075W	YPL246C			YDR166C
						YGR169C-A	YLR043C			YKL003C															YGL131C										YML112W						YOL082W	YLR039C			YER185W
						YGL102C	YOR369C			YKR098C															YGL243W										YDR325W						YFR019W	YCR069W			YHR004C
						YPR132W	YGR232W			YGR135W															YIR025W										YFR043C						YPR160W	YCR090C			YJR050W
						YNL336W	YLR078C			YOR078W															YDR063W										YJR136C						YHL047C	YOL129W			YKR089C
						YOR285W	YDR068W			YER037W															YJL137C										YGR005C						YBL100C	YFR053C			YKR098C
						YGR209C	YCR021C			YLR214W															YNL107W										YNL032W						YAL002W	YJR121W			YLR016C
						YFR052C-A	YAR008W			YMR179W															YLR376C										YHR159W						YDR032C	YOR317W			YNL138W-A
						YDL135C	YLR166C			YLR257W															YNL185C										YPL065W						YLR118C	YGR209C			YOR308C
						YGL226C-A	YLR198C			YBR165W															YDR159W										YHR052W-A						YLL040C	YGL208W			YPL011C
						YDR373W	YLR076C			YNL056W															YOR148C										YHR054W-A						YGR043C	YDL093W			YLL057C
						YPR020W	YCR090C			YER098W															YPR017C										YPL042C						YDL164C	YJL002C			YEL052W
						YNR074C	YOR143C			YER079W															YBL074C										YPR120C						YOR054C	YLL028W			YLR402W
						YMR269W	YKL058W			YIL065C															YIL063C										YNL029C						YMR261C	YNL160W			YHR165W-A
						YMR143W	YDL153C			YKL045W															YLR025W										YDR018C						YIL101C	YGL161C			YNL027W
						YKL083W	YJL031C			YKL218C															YIL159W										YML088W						YDR144C	YPR026W			YHR090C
						YJL115W	YML062C			YBR137W															YGR202C										YDR079C-A						YNL045W	YGL037C			YDL105W
						YLR251W	YDR447C			YPR102C															YKL155C										YER142C						YOR227W	YGL187C			YDL189W
						YEL039C	YDR196C			YGL031C															YGL053W										YMR269W						YJL164C	YML128C			YDR162C
						YBR056W	YHL034W-A			YJR122W															YGR091W										YBR279W						YJL101C	YML070W			YKR036C
						YOR102W	YGL161C			YKL067W															YMR087W										YDL117W						YIR007W	YLR178C			YLR394W
						YMR173W-A	YOR253W			YNL029C															YPL269W										YDL207W						YKL197C	YJR001W			YMR181C
						YLR262C-A	YLR441C			YPR179C															YCL047C										YPL219W						YNL274C	YDL217C			YOL117W
						YBL077W	YOR006C			YOR327C															YKR035C										YIR025W						YGR256W	YMR169C			YOR324C
						YNL143C	YNL259C			YGL072C															YOR052C										YJL072C						YDL077C	YML121W			YGL113W
						YAL037C-B	YBL018C			YNL024C															YDR248C										YDL183C						YDR074W	YJR033C			YAL001C
						YOR169C	YER042W			YNR059W															YML104C										YMR163C						YBR280C	YAL005C			YBR020W
							YNL147W			YDR500C															YBR295W										YDR108W						YNL194C	YDR059C			YHR056C
							YBR164C			YOR195W															YLR217W										YBR284W						YNR055C	YLL031C			YNL032W
							YHR054C			YDR187C															YOL164W										YIL122W						YOR185C	YKL203C			YNL286W
							YHR121W			YLR093C															YNL159C										YDR004W						YOR273C	YMR170C			YLR039C
							YHL047C			YDL113C															YDL207W										YJR072C						YJL016W	YBL064C			YDR230W
							YBR159W			YJL129C															YGR169C										YLR360W						YIL010W	YBR024W			YBR125C
							YNL150W			YDR005C															YHR002W										YCR098C						YGR284C	YJL171C			YDR179C
							YIL111W			YNL084C															YKR095W-A										YBR255W						YJL005W	YDR111C			YDR351W
							YGR169C-A			YKL143W															YLR132C										YIL061C						YJL070C	YJL172W			YER152W-A
							YBR096W			YBR302C															YPR119W										YJR097W						YIL017C	YPR098C			YGR196C
							YGR199W			YJL074C															YPL193W										YNL164C						YOR065W	YHR054C			YHR067W
							YGL102C			YML132W															YCR021C										YMR180C						YJL052W	YDR433W			YLR112W
							YPR132W			YDR021W															YOR047C										YDR334W						YHR016C	YLR422W			YNL298W
							YOR285W			YHR065C															YNL328C										YIL159W						YGL060W	YGR194C			YAL047C
							YNL336W			YBR104W															YKR028W										YJL067W						YBR026C	YER053C			YGL192W
							YGR209C			YLR453C															YLR097C										YML023C						YHR182C-A	YOR383C			YIL046W
							YFR052C-A			YBL063W															YNL258C										YNL094W						YPL270W	YBR125C			YLR092W
							YDL135C			YJR052W															YOR195W										YOR114W						YDR380W	YDR453C			YMR209C
							YGL226C-A			YML118W															YPR194C										YKL099C						YER152C	YAL008W			YMR228W
							YDR373W			YOR111W															YDL159W										YDR065W						YBL015W	YDR519W			YPR066W
							YPR020W			YPR180W															YER098W										YPL268W						YMR105C	YGR199W			YJL211C
							YNR074C			YGR183C															YHR066W										YDR014W						YOR382W	YPL006W			YOR018W
							YMR269W			YLR312W-A															YLR171W										YDR541C						YNL106C	YJR137C			YPR046W
							YKL083W			YLR170C															YPR083W										YHR160C						YPR184W	YKL103C			YPR010C-A
							YMR143W			YLR009W															YOR367W										YPL020C						YPR155C	YJR066W			YDL045C
							YJL115W			YDR027C															YDR412W										YDL030W						YJL068C	YHR204W			YDR255C
							YLR251W			YDR057W															YDR329C										YMR240C						YPL134C	YCR032W			YHR017W
							YEL039C			YOR169C															YIL149C										YFR036W-A						YLR134W	YMR304W			YFR046C
							YBR056W			YDR181C															YMR183C										YKL108W						YLL058W	YML120C			YDL179W
							YOR102W			YHR002W															YOR162C										YNL230C						YOR291W	YIL124W			YDR081C
							YMR173W-A			YDL062W															YFR039C										YOL034W						YDL248W	YOR230W			YDR143C
							YLR262C-A			YMR193C-A															YGR069W										YOR030W						YGR248W	YBR220C			YER129W
							YBL077W			YJR021C															YLR457C										YOL001W						YMR173W-A	YDR456W			YFR020W
							YNL143C			YNL129W															YGL080W										YHR136C						YDL023C	YKL100C			YGL107C
							YAL037C-B			YOL033W															YGL072C										YMR284W						YBR214W	YGR141W			YGL160W
							YOR169C			YOR354C															YHR129C										YIL096C						YBR056W	YJL112W			YHR114W
							YPL250W-A			YMR210W															YBR285W										YOR390W						YGL006W	YPR160W			YHR184W
										YIL014W															YDL117W										YDL149W						YMR090W	YFR019W			YJL047C
										YBR262C															YER047C										YBL014C						YGR205W	YNL100W			YJL082W
										YLR022C															YOR131C										YDL096C						YMR196W	YDR032C			YJR152W
										YBR014C															YIR018W										YCR091W						YGL156W	YHL047C			YKL187C
										YNL006W															YBL021C										YER002W						YKL129C	YBL100C			YML054C
										YDR168W															YER065C										YGL098W						YDR406W	YLL040C			YMR001C
										YML023C															YJL203W										YGL222C						YOR169C	YLR345W			YMR056C
										YER029C															YPR131C										YJL155C						YHR137W	YAL002W			YMR078C
										YLR446W															YIL138C										YML062C						YML100W	YPR147C			YMR302C
										YOL016C															YHL038C										YMR005W						YPR117W	YDR366C			YNL237W
										YPR108W															YKR064W										YMR271C						YBR176W	YLR118C			YNR066C
										YJR115W															YPL132W										YNL077W						YBR117C	YDL164C			YPL100W
										YBR181C															YKL001C										YNL206C						YFR052C-A	YAL058W			YPR021C
										YPL138C															YJL036W										YGL021W						YPL036W	YML054C			YPR101W
										YBR192W															YNL073W										YER131W						YLR258W	YMR261C			YPR195C
										YPR098C															YCR024C										YIL139C						YDL223C	YIL101C			YPL157W
										YJL024C															YFR022W										YLR181C						YMR250W	YNL045W			YDR104C
										YCL031C															YJL140W										YDR419W						YNL090W	YDR144C			YCR097W
										YMR286W															YJR098C										YDR113C						YLR379W	YDR100W			YER161C
										YKL108W															YKL187C										YNR003C						YOL084W	YOR118W			YIL004C
										YHR143W-A															YLR205C										YBL057C						YHR092C	YKL168C			YNL126W
										YGL069C															YLR361C-A										YBR138C						YDL222C	YOR297C			YNL314W
										YCL016C															YDR126W										YDR480W						YGL226C-A	YOR227W			YPL244C
										YGR276C															YLR038C										YKL082C						YHR096C	YJL101C			YDL028C
										YHR043C															YGR165W										YGR275W						YGR088W	YAL037C-B			YDL048C
										YLR174W															YLR253W										YGR284C							YMR113W			YDR045C
										YNL004W															YDR421W										YKR062W							YMR075W			YER067W
										YKL002W															YGL094C										YGR121C							YIR007W			YHR103W
										YHL014C															YIL151C										YPR119W							YDR074W			YIR030W-A
										YDL133W															YML064C										YIR009W							YGR043C			YKR079C
										YMR282C															YNL035C										YPR194C							YNR055C			YLL056C
										YBL075C															YNL076W										YPL047W							YOR273C			YLR035C
										YJR071W															YML088W										YBL074C							YJL016W			YCR048W
										YLR345W															YKL109W										YML037C							YGR284C			YMR150C
										YGR251W															YPL099C										YLR092W							YJL005W			YLR353W
										YBR168W															YDL045W-A										YNL160W							YOR065W			YDR520C
										YBR129C															YJR092W										YPL024W							YKL197C			YGL037C
										YGR169C															YLR185W										YPR196W							YHR182C-A			YGL161C
										YPL241C															YJR089W										YBR071W							YJL052W			YNR040W
										YJL125C															YJR147W										YKL048C							YHR016C			YDR066C
										YDR299W															YMR117C										YCL059C							YGR256W			YHR155W
										YOL022C															YBR128C										YDR063W							YDR380W			YKR015C
										YER161C															YHR171W										YNL099C							YBL015W			YBR113W
										YOR003W															YLR082C										YKR101W							YBR280C			YDR282C
										YLR003C															YPR051W										YNL304W							YBR026C			YJR053W
										YGR103W															YDR480W										YGR206W							YMR105C			YJR112W-A
										YGL128C															YGL079W										YDR045C							YPR184W			YFR042W
										Q0250															YGR030C										YGR237C							YER152C			YIL120W
										YFL028C															YMR137C										YKL068W-A							YOR185C			YBR107C
										YJR088C															YMR213W										YFR020W							YJL068C			YDR042C
										YKR078W															YNL051W										YPL057C							YLR134W			YKL070W
										YOR292C															YGR040W										YJR098C							YOR291W			YNL058C
										YLR387C															YOL078W										YKL091C							YLL058W			YNL278W
										YHR010W															YDR515W										YMR190C							YGL060W			YOR037W
										YIL045W															YPL104W										YJR092W							YPL270W			YPL113C
										YGL257C															YPL083C										YOR257W							YMR173W-A			YPL199C
										YCL047C															YER077C										YBR262C							YGR248W			YEL064C
										YDL181W															YPR053C										YGL169W							YBR214W			YFR021W
										YKR017C															YIR015W										YPL104W							YBR056W			YGL124C
										YKR072C															YER140W										YGL075C							YGL006W			YGR223C
										YPR166C															YLR131C										YNL107W							YGL156W			YMR026C
										YGL196W															YLR438C-A										YBR123C							YMR196W			YMR288W
										YOL053W															YPL159C										YCR005C							YOR169C			YJL095W
										YOL001W															YJL112W										YOR107W							YKL129C			YGL079W
										YKL033W-A															YPL094C										YDL074C							YHR137W			YKR068C
										YHR052W															YLR136C										YAL025C							YML100W			YLR298C
										YMR137C															YLR191W										YOR249C							YBR117C			YLR385C
										YNL051W															YOR354C										YDL129W							YPL036W			YER084W
										YDL075W															YKL214C										YDR329C							YDR406W			YPL115C
										YOL158C															YGL180W										YLR082C							YMR250W			YCL042W
										YHR080C															YMR060C										YPL083C							YDL223C			YDR344C
										YIL040W															YKL218C										YOR266W							YLR258W			YGR278W
										YMR041C															YNL127W										YPL005W							YHR092C			YHR112C
										YGL147C															YBR060C										YJL139C							YDL222C			YPR089W
										YGR071C															YDL148C										YKR044W							YHR096C			YBL017C
										YBR150C															YOR250C										YCL029C							YGR088W			YGR283C
										YAL015C															YOR328W										YJL125C							YMR060C			YGL254W
										YPL074W															YOR390W										YLR025W							YNR034W			YAL048C
										YDR056C															YER050C										YGR102C							YOR289W			YLR436C
										YGL229C															YER087C-A										YGL058W							YBR161W			YAL059W
										YGL251C															YMR224C										YCL063W							YDR470C			YCR081W
										YGR063C															YOL028C										YCR034W							YOL082W			YDR019C
										YHL002C-A															YOR097C										YER093C-A							YOR054C			YDR093W
										YJL112W															YPR094W										YHR002W							YJL164C			YGL184C
										YLR020C															YDR020C										YLR253W							YNL274C			YLL031C
										YLR135W															YER173W										YCR060W							YDL077C			YMR073C
										YMR234W															YDR338C										YMR039C							YNL194C			YOL112W
										YMR264W															YLR007W										YOR115C							YIL010W			YKL064W
										YPL039W															YNR037C										YLR097C							YJL070C			YER121W
										YPR073C															YMR181C										YHL024W							YIL017C			YKL176C
										YOR244W															YDL176W										YNL035C							YOR382W			YLR097C
										YER012W															YPL196W										YGR169C-A							YNL106C			YOR113W
										YKL174C															YIL031W										YKR064W							YPR155C			YGR239C
										YKL074C															YDR524C										YDR485C							YPL134C			YGL213C
										YOL142W															YBR057C										YKR100C							YDL248W			YLR419W
										YGR028W															YIL061C										YLR014C							YDL023C			YOR192C
										YGR085C															YCR083W										YJL203W							YMR090W			YBR066C
										YGR099W															YGR112W										YJR134C							YGR205W			YBR244W
										YMR030W															YOR213C										YNL225C							YBR176W			YDR301W
										YKL023W															YKL176C										YDR423C							YPR117W			YDR381C-A
										YPL072W															YLR098C										YKL005C							YFR052C-A			YDR422C
										YBR264C															YOR123C										YKL172W							YNL090W			YER061C
										YER127W															YNR006W										YMR213W							YLR379W			YFL047W
										YKL063C															YDL092W										YPR157W							YOL084W			YGL170C
										YHR196W															YKR100C										YKL018C-A							YGL226C-A			YHL044W
										YLR149C															YNL099C										YLR412W										YJR115W
										YML009C															YOR053W										YER162C										YJR153W
										YGR280C															YDR484W										YMR020W										YLR127C
										YBL059W															YLR099W-A										YHR131C										YLR257W
										YJL046W															YLR425W										YLR233C										YMR303C
										YPL059W															YDL056W										YFR035C										YNL194C
										YKL113C															YPL227C										YMR094W										YOR076C
										YDR075W															YLR390W										YLR091W										YPL020C
										YML063W															YOL082W										YBR055C										YBL086C
										YDL074C															YBR237W										YPR083W										YDR150W
										YBR043C															YDR299W										YGL002W										YER053C
										YGR009C															YMR098C										YHR129C										YHR159W
										YMR068W															YCR043C										YOL067C										YJL057C
										YNL231C															YGR237C										YPR178W										YAR042W
										YKR019C															YJL072C										YAL033W										YJR124C
										YEL009C															YJR136C										YDL033C										YKR027W
										YJR083C															YJL139C										YDL176W										YLL032C
										YER147C-A															YOR191W										YJR011C										YCL041C
										YIL073C															YER015W										YBL052C										YDR350C
										YDR121W															YKR063C										YBR111W-A										YDR421W
										YMR283C															YFL023W										YDR229W										YER111C
										YDL090C															YOL032W										YKR099W										YKR106W
										YJR097W															YBR284W										YOR159C										YNL029C
										YNL194C															YCL016C										YNR032C-A										YKR006C
										YKL222C															YDR031W										YJR121W										YFL034W
										YDL149W															YGR207C										YEL061C										YAL060W
										YBR295W															YIR009W										YKL171W										YBL069W
										YDR200C															YNL304W										YGR112W										YJL195C
										YLR194C															YDR179W-A										YHR078W										YJR051W
										YMR161W															YJR056C										YMR181C										YLR362W
										YNL217W															YDL240W										YJR089W										YGL180W
										YDL176W															YDR464W										YOL009C										YOR173W
										YGL227W															YNL295W										YOR194C										YGL094C
										YJL090C															YDL088C										YPL074W										YNL152W
										YPL230W															YPL018W										YCL004W										YER019W
										YBR279W															YHR150W										YHR182W										YJR059W
										YDR440W															YLR181C										YLR309C										YLR431C
										YLR438C-A															YLR356W										YGR120C										YAR031W
										YOR054C															YOL041C										YBR295W										YBR182C
										YDR176W															YAL042C-A										YHL029C										YML062C
										YDR414C															YGR275W										YHL038C										YGL088W
										YLR018C															YKL160W										YLR168C										YIL073C
										YNL082W															YLR438W										YDR079W										YGR007W
										YLR316C															YOL136C										YDR249C										YGR099W
										YBR164C															YOR137C										YDR358W										YJL071W
										YER162C															YPL254W										YMR060C										YMR261C
										YGL212W															YBR081C										YLR407W										YNL288W
										YAL010C															YMR167W										YER047C										YOR132W
										YCR038C															YBL060W										YBL060W										YPL110C
										YCL033C															YAR050W										YDR068W										YNR011C
										YDR280W															YIL065C										YDR058C										YPL089C
										YPL211W															YCL029C										YKR029C										YGL060W
										YKL114C															YDR249C										YNL258C										YJL073W
										YPL152W															YNL008C										YDR280W										YBR183W
										YDR529C															YPR107C										YGL026C										YJR151C
										YKR011C															YFL036W										YPL175W										YOL033W
										YOR338W															YNL314W										YGL128C										YLL005C
										YHR147C															YGL209W										YNR054C										YLR082C
										YHR106W															YAL024C										YAL062W										YLR247C
										YLR407W															YAR002W										YBR203W										YLR234W
										YBR095C															YLL010C										YMR055C										YGR017W
										YPL253C															YLR162W-A										YGR029W										YHL026C
										YAL042C-A															YGR222W										YOL089C										YHR161C
										YBR259W															YER060W										YPL099C										YKR045C
										YNL113W															YLR312W-A										YPL018W										YPL220W
										YKL007W															YGR122W										YPR013C										YLR103C
										YNL232W															YBR123C										YHR132W-A										YIR023W
										YNL308C															YML062C										YOL105C										YDL050C
										YKR094C															YOL107W										YOR306C										YHR071C-A
										YER019C-A															YMR014W										YBR158W										YKL218C
										YDR002W															YKR086W										YNL022C										YBL057C
										YPR061C															YDL206W										YMR286W										YPL065W
										YMR135C															YNL039W										YJR129C										YDR038C
										YNL151C															YER013W										YPL239W										YER190W
										YJL190C															YGR079W										YLR361C-A										YOL133W
										YGL211W															YLR427W										YBL080C										YOR368W
										YOR130C															YDL147W										YEL016C										YGR121C
										YDR041W															YGR082W										YJL140W										YOR223W
										YLR441C															YMR030W										YKL079W										YOL068C
										YBR024W															YJR039W										YNL076W										YDL080C
										YMR293C															YBR155W										YMR317W										YKL036C
										YOR374W															YCR005C										YCR087W										YER078C
										YPR136C															YOR003W										YNL079C										YHL007C
										YMR111C															YIL004C										YJR043C										YER046W
										YKL056C															YPL050C										YLR368W										YDR374W-A
										YOR232W															YHR039C-A										YJR083C										YEL029C
										YGR093W															YPL198W										YKL156W										YGR296W
										YFL024C															YKL189W										YDL106C										YIL071C
										YDR495C															YPR031W										YHR194W										YPL283C
										YER173W															YER040W										YMR144W										YER087W
										YHR118C															YOR295W										YNL073W										YLR272C
										YOL096C															YPR060C										YMR030W										YPL132W
										YJR149W															YPR137W										YNL231C										YMR219W
										YDR327W															YDR113C										YDR428C										YJL099W
										YFR004W															YMR097C										YGL131C										YLR073C
										YNL246W															YBR210W										YKR009C										YBL018C
										YIL020C															YDL219W										YDR500C										YCR076C
										YDR171W															YFR027W										YDL206W										YEL005C
										YKL196C															YGL045W										YJL168C										YGR068C
										YML053C															YIL083C										YDR248C										YKL010C
										YPR018W															YML023C										YDR282C										YLR118C
										YLR363W-A															YPR101W										YHR066W										YMR032W
										YBL010C															YCR033W										YKR095W-A										YMR287C
										YEL061C															YNL193W										YMR014W										YNL272C
										YGR101W															YDR229W										YMR161W										YNR067C
										YKR086W															YMR180C										YLR154W-E										YOL155C
										YNL304W															YGL075C										YDR291W										YDR490C
										YPR148C															YBR233W-A										YKL119C										YGL227W
										YNL261W															YBR282W										YOR073W										YOR135C
										YMR044W															YKL049C										YMR011W										YDL062W
										YNL100W															YCL014W										YBR146W										YDR078C
										YOL095C															YKL222C										YDL098C										YGR006W
										YKL092C															YFL027C										YDR132C										YHR178W
										YPR157W															YLR115W										YMR172W										YLL006W
										YGR121C															YLR246W										YLR177W										YIL040W
										YGR020C															YMR104C										YBR289W										YKL174C
										YMR185W															YOR306C										YLL027W										YLR288C
										YBR236C															YKL133C										YLR213C										YPR134W
										YKL065C															YOR178C										YGR079W										YMR169C
										YDL179W															YDL183C										YNR039C										YBR280C
										YGR171C															YPL120W										YDR361C										YIL036W
										YML065W															YMR004W										YKL098W										YDR020C
										YDR350C															YNL095C										YLR043C										YKL137W
										YML080W															YHR154W										YPL164C										YLR312C
										YGL091C															YDR018C										YMR137C										YJL025W
										YGL143C															YKL005C										YML133C										YKR035C
										YCL001W															YDR115W										YBL049W										YGL003C
										YCR023C															YDL010W										YDL115C										YDL199C
										YGR252W															YML061C										YGL080W										YLL019C
										YGR117C															YOR159C										YHR209W										YBL059C-A
										YDL213C															YNL277W										YMR106C										YBL063W
										YBR083W															YNL029C										YMR250W										YDL119C
										YLR085C															YJL054W										YDL133W										YER128W
										YLR243W															YGR174C										YMR282C										YLR155C
										YBR152W															YDR195W										YDL065C										YLR157C
										YMR280C															YNL175C										YGL180W										YLR158C
										YPL271W															YDR125C										YBL046W										YLR160C
										YKR081C															YDR140W										YKL138C										YMR170C
										YAR033W															YNL260C										YBR150C										YAL010C
										YDL005C															YAR033W										YDR356W										YGL005C
										YKL091C															YLR152C										YIL013C										YHR082C
										YJL206C															YNL094W										YJR141W										YIL023C
										YBL025W															YMR239C										YLR376C										YJR055W
										YBR166C															YHR144C										YLR141W										YNL242W
										YDR363W															YCL032W										YPL264C										YJR030C
										YPR047W															YLR226W										YBL078C										YHR022C
										YGR239C															YKL121W										YOL080C										YLR137W
										YKL166C															YHR169W										YFR042W										YDL087C
										YGL044C															YLR407W										YDR412W										YKL138C
										YDR277C															YMR042W										YMR225C										YNL094W
										YBR006W															YKR029C										YOR317W										YNR062C
										YOR173W															YHR209W										YER050C										YKL222C
										YCL051W															YJL035C										YHL044W										YHR175W
										YDR118W															YMR112C										YOR250C										YIL006W
										YJL070C															YPR010C-A										YOL073C										YCR095C
										YJR043C															YMR190C										YPL120W										YIR042C
										YIL091C															YMR020W										YDR265W										YLR090W
										YBR231C															YBL080C										YAL059W										YOR034C
										YER175C															YBR171W										YGL209W										YOR213C
										YHR161C															YDL109C										YLR243W										YPL277C
										YMR240C															YDR076W										YLR131C										YPR099C
										YGL002W															YFL037W										YMR021C										YDR488C
										YHR170W															YHR031C										YMR052W										YPL059W
										YLR319C															YMR127C										YBR058C-A										YGL117W
										YBL055C															YOR380W										YPR101W										YIL160C
										YHR090C															YBR150C										YHR177W										YOL001W
										YMR066W															YDR243C										YDL001W										YPR071W
										YNL175C															YLR353W										YLR353W										YML116W
										YIL117C															YGR098C										YPL036W										YDR028C
										YOR210W															YIR023W										YOR223W										YOR144C
										YOR245C															YKR060W										YOL082W										YGL057C
										YDL001W															YLR260W										YOL016C										YNR032W
										YER133W															YLR322W										YDL113C										YBR240C
										YLR099W-A															YMR053C										YHR067W										YDL027C
										YJL147C															YNL229C										YIL031W										YHR035W
										YEL006W															YPL161C										YLR080W										YOR174W
										YDL191W															YBR203W										YPR082C										YOR297C
										YPR169W															YHR106W										YOR020W-A										YKL011C
										YDR243C															YOL105C										YNR006W										YLR411W
										YPR133C															YFR031C										YJL122W										YEL011W
										YDR240C															YDR468C										YLR154C										YDR312W
										YGL134W															YML020W										YLR426W										YBR229C
										YHR097C															YCR018C-A										YIL019W										YKL068W-A
										YKR036C															YDR365C										YKL154W										YML120C
										YDL007W															YNL137C										YKL159C										YJR052W
										YCR020C-A															YDR217C										YKL160W										YCR049C
										YIL055C															YEL051W										YDR052C										YDR358W
										YEL020C															YKR021W										YGL229C										YDR538W
										YNL001W															YGR056W										YIL064W										YGL168W
										YBL052C															YGR140W										YLR435W										YJR146W
										YBL088C															YGR187C										YML104C										YMR036C
										YLR191W															YMR021C										YAL042C-A										YNL097C
										YOR016C															YBL071W-A										YDL088C										YNL196C
										YBR004C															YKL041W										YJL045W										YIL161W
										YBR153W															YMR144W										YMR001C										YDR409W
										YHR005C															YJL092W										YHR005C										YNL166C
										YLR381W															YOR344C										YDR440W										YOR193W
										YLR368W															YFR007W										YPR124W										YOR353C
										YNL223W															YIL091C										YIR023W										YPR146C
										YFL017C															YOL001W										YIL065C										YER143W
										YKR088C															YOR141C										YLL010C										YDR125C
										YCL059C															YOR005C										YDL092W										YIL077C
										YOL002C															YHL021C										YPL181W										YOL128C
										YNR061C															YNL292W										YLR224W										YKL132C
										YGL224C															YMR262W										YFL027C										YMR119W
										YCL032W															YJR129C										YML006C										YDL019C
										YOR308C															YFL024C										YOL078W										YDR096W
										YPR185W															YOR226C										YGL243W										YPL002C
										YGL145W															YJL056C										YER077C										YPL116W
										YNL180C															YKR062W										YML055W										YPL056C
										YJL122W															YMR061W										YBR130C										YDR221W
										YDR026C															YDR228C										YMR185W										YDR539W
										YML071C															YOR033C										YPL227C										YFR043C
										YOL124C															YPL209C										YPR179C										YDL042C
										YPL144W															YBL067C										YDR315C										YLR049C
										YNL024C-A															YOR147W										YKL167C										YOR253W
										YOL102C															YPR185W										YKR025W										YGL209W
										YIL151C															YBR072W										YLR425W										YHR138C
										YNL173C															YGL002W										YML056C										YMR115W
										YGR074W															YGL144C										YOR028C										YOR349W
										YOR212W															YDR520C										YPR111W										YPL085W
										YMR211W															YIL001W										YOR238W										YJL181W
										YNR029C															YKL091C										YJL126W										YBL059W
										YJL036W															YPR013C										YJR130C										YBR073W
										YGR286C															YOR043W										YAR033W										YGR023W
										YMR130W															YOR389W										YML094W										YBR211C
										YNL040W															YBR002C										YOL028C										YDL247W
										YLR392C															YGR161C										YBR057C										YDR264C
										YOL071W															YDR440W										YJL030W										YMR179W
										YML020W															YDR466W										YDR299W										YPL180W
										YNR035C															YHL019C										YIL144W										YAL022C
										YDR460W															YKL105C										YOR032C										YDL146W
										YLL004W															YLR154C										YER127W										YMR185W
										YPR095C															YPR179C										YDL161W										YNL191W
										YHL025W															YOL043C										YDL194W										YGR111W
										YOL010W															YKL111C										YMR026C										YKL116C
										YBR098W															YML055W										YIL091C										YBL060W
										YER059W															YKL013C										YIL152W										YJL185C
										YBL093C															YER061C										YOR017W										YDR142C
										YML024W															YEL025C										YOR080W										YJR062C
										YOL112W															YMR024W										YGL003C										YLR383W
										YKL090W															YNL056W										YGL216W										YPL136W
										YCR079W															YOR221C										YGR002C										YLR297W
										YJL085W															YCL067C										YPR009W										YNL275W
										YKL013C															YCR039C										YML003W										YOR350C
										YPR045C															YPL118W										YAL011W										YBR186W
										YCR073C															YNR049C										YDR176W										YKL094W
										YMR155W															YPL059W										YGL240W										YLR040C
										YDR415C															YJR141W										YGR202C										YLR098C
										YPL095C															YDL142C										YOR137C										YML081W
										YJR119C															YGL003C										YOR274W										YMR290W-A
										YPR086W															YJR094C										YPL075W										YOL045W
										YKL208W															YOR198C										YMR104C										YPL250C
										YJR025C															YHL010C										YIL084C										YPR204W
										YDR085C															YPL109C										YIL093C										YMR211W
										YLR148W															YAL010C										YER129W										YDL056W
										YBL091C-A															YER112W										YMR227C										YGL081W
										YNL245C															YGL004C										YNL142W										YGR096W
										YOR158W															YKL033W										YPR065W										YIL122W
										YER077C															YPR049C										YKL133C										YLR241W
										YDR329C															YKL193C										YBR237W										YLR453C
										YLR288C															YPL066W										YDR159W										YLR460C
										YMR048W															YPR115W										YJR094C										YOR211C
										YMR212C															YHR101C										YLR260W										YPR162C
										YNL200C															YDL113C										YIL115W-A										YBR153W
										YBR044C															YLR019W										YKL155C										YDR436W
										YAL008W															YGR088W										YKL049C										YGR026W
										YOL125W															YGL021W										YOR354C										YKL076C
										YDL189W															YJL053W										YJR149W										YGL053W
										YML015C															YPL005W										YBR044C										YDL024C
										YPL268W															YPL219W										YMR184W										YNL274C
										YBL057C															YIL112W										YPR085C										YDR505C
										YNL047C															YAL011W										YLR022C										YPL138C
										YBL005W															YER022W										YPR134W										YPR133W-A
										YEL016C															YJL144W										YDR086C										YPL215W
										YBR237W															YKR044W										YPL003W										YMR316W
										YDR358W															YDR428C										YMR087W										YFL040W
										YDR449C															YDR280W										YNL159C										YBR228W
										YMR290W-A															YDL098C										YOR195W										YJR035W
										YNL293W															YER139C										YPL154C										YBR168W
										YGR118W															YNL215W										YDL213C										YDL104C
										YMR020W															YMR138W										YBR002C										YGL155W
										YNR003C															YDR424C										YDR337W										YJL214W
										YDL188C															YNL250W										YJL104W										YLR415C
										YOL127W															YMR263W										YKR021W										YBL062W
										YLL054C															YDR061W										YMR168C										YBR024W
										YMR168C															YJR090C										YDR432W										YCR068W
										YNL325C															YLR091W										YER040W										YGR077C
										YPR015C															YLR224W										YJL036W										YLL026W
										YHR035W															YNL002C										YAL024C										YBL103C
										YDR450W															YDR194C										YML020W										YBR198C
										YER130C															YPL070W										YJL093C										YHR214W-A
										YKL151C															YIL064W										YMR167W										YJL020C
										YLR180W															YKL143W										YER008C										YLL064C
										YML021C															YDR175C										YER020W										YNR076W
										YLR065C															YKL139W										YIL001W										YOL158C
										YER111C															YDR479C										YJL148W										YPR135W
										YHL010C															YKR016W										YKL074C										YCL007C
										YOL034W															YLR272C										YOL135C										YLR254C
										YML064C															YPR125W										YDR338C										YER155C
										YKL088W															YDR337W										YDR243C										YKR004C
										YHR154W															YJR080C										YIL063C										YNL162W-A
										YBR157C															YDR379W										YCL002C										YDR522C
										YML006C															YMR143W										YFR031C										YDR293C
										YGL244W															YNL299W										YKL187C										YER015W
										YBR092C															YPL112C										YPL230W										YJL077C
										YBR122C															YNL005C										YDL175C										YLL049W
										YHR066W															YFL046W										YLR427W										YDR219C
										YJL139C															YJL047C										YGL121C										YGR268C
										YJL156C															YHR042W										YIL117C										YNL120C
										YDR202C															YMR286W										YPL001W										YGL141W
										YIL096C															YOL067C										YPR105C										YBR108W
										YPL195W															YMR184W										YDR330W										YBR255C-A
										YLR067C															YDR351W										YER013W										YDR206W
										YOR280C															YOL128C										YOL032W										YDR273W
										YPL026C															YPL154C										YMR143W										YGL249W
										YJL209W															YNL061W										YDR200C										YJR160C
										YJR030C															YPR072W										YGR047C										YKL188C
										YCR032W															YBR247C										YOR047C										YLL059C
										YHR195W															YDR270W										YMR147W										YML034C-A
										YKR087C															YER126C										YDL138W										YML065W
										YER128W															YGL085W										YPL196W										YNL021W
										YML119W															YKL124W										YBL088C										YOL017W
										YMR178W															YDR027C										YCL049C										YOL052C
										YBR096W															YHR168W										YIL006W										YOR249C
										YIL076W															YNR024W										YPL069C										YPR047W
										YOL080C															YER129W										YDR061W										YPR081C
										YGR023W															YDR083W										YDR125C										YLR306W
										YGR221C															YBR114W										YER079W										YLR368W
										YGR235C															YIL147C										YGR223C										YGL070C
										YKR064W															YNL160W										YJL112W										YAL034W-A
										YPL043W															YPR045C										YKL040C										YDL049C
										YPL243W															YJL148W										YKL218C										YLR077W
										YKL167C															YER167W										YLR132C										YMR262W
										YMR207C															YJR076C										YMR283C										YKR023W
										YPL053C															YGR223C										YNL151C										YLR174W
										YML097C															YKL096W										YPR047W										YLR457C
										YNL095C															YHR132W-A										YPR017C										YNL011C
										YDL045C															YPL069C										YER128W										YOR325W
										YLR015W															YGL255W										YER098W										YAL027W
										YHR100C															YOL140W										YGR082W										YBL089W
										YDR428C															YMR115W										YPR137W										YCR010C
										YGR246C															YIL049W										YGR165W										YDR410C
										YEL005C															YNL072W										YKR096W										YER166W
										YBR284W															YCL004W										YIL007C										YGL188C-A
										YBL029W															YNL329C										YBL090W										YGR051C
										YBR111C															YFR043C										YGL004C										YGR154C
										YGR179C															YPR095C										YHR167W										YGR266W
										YGR186W															YDR198C										YJL090C										YJL147C
										YIR025W															YKR014C										YNL157W										YKR007W
										YMR156C															YDR500C										YNL211C										YLR117C
										YNR045W															YER111C										YPR031W										YML119W
										YDR398W															YGL254W										YJR003C										YNR002C
										YDR531W															YHL009C										YPR003C										YOL036W
										YBR227C															YKL018C-A										YDR009W										YOR179C
										YOR328W															YPL074W										YKL090W										YOR250C
										YML116W															YKL154W										YNR009W										YJL060W
										YJR147W															YOL080C										YGR140W										YHR177W
										YOL068C															YDR034C										YBR043C										YNL137C
										YLR395C															YHR017W										YPL066W										YCR033W
										YGL113W															YMR033W										YLR191W										YJR137C
										YGR188C															YPL060W										YHR080C										YAL054C
										YOL077C															YDR289C										YHR178W										YLR081W
										YJR101W															YPL181W										YHR161C										YOL132W
										YBL038W															YMR044W										YLR137W										YDR183C-A
										YIR010W															YLR117C										YGR225W										YER079C-A
										YDR007W															YPL003W										YDR115W										YER137C
										YDL148C															YOL089C										YLR171W										YGR146C
										YDL165W															YHR084W										YEL053W-A										YHR168W
										YLR117C															YLR168C										YBR215W										YJL078C
										YDR429C															YLR449W										YNL215W										YKL044W
										YNR060W															YPR117W										YDR289C										YOR041C
										YDL129W															YOL077C										YGR017W										YOR069W
										YHR201C															YDL209C										YPR021C										YBR298C
										YNL002C															YKL179C										YGL166W										YHR206W
										YER123W															YCR082W										YBR285W										YIL061C
										YBR042C															YER008C										YDL013W										YOR258W
										YMR197C															YLR456W										YDR501W										YDR204W
										YNL148C															YNR003C										YOR123C										YJL155C
										YGR174C															YNR039C										YPL257W										YKL033W
										YBL019W															YGL216W										YPR051W										YLR289W
										YJR130C															YAL025C										YDR421W										YML101C
										YAR050W															YOR127W										YDR083W										YBR156C
										YNR023W															YDR422C										YDR369C										YKL051W
										YMR289W															YOL009C										YDR451C										YLR088W
										YPR013C															YDL006W										YNL109W										YNL139C
										YOR062C															YFL034W										YPR028W										YLR363W-A
										YER147C															YJL176C										YJL180C										YHL046W-A
										YMR078C															YOR232W										YLR378C										YIL068C
										YPL242C															YOR144C										YJR135C										YKL162C
										YAL034C															YOR018W										YKL139W										YML050W
										YER163C															YLR287C-A										YPL159C										YNR034W
										YGL176C															YDL073W										YDL159W										YOR070C
										YML061C															YFR016C										YDR076W										YDL001W
										YKL094W															YDR439W										YNL293W										YGR194C
										YNL252C															YKL108W										YCL005W										YJL096W
										YDR306C															YBR215W										YDL045W-A										YJR080C
										YPR060C															YFL008W										YLL036C										YLR209C
										YMR184W															YGL246C										YMR194W										YOL028C
										YPL153C															YOR258W										YDR034C										YPL165C
										YDR416W															YPL243W										YNL245C										YPR022C
[truncated: 1,923 more rows]

## Sheet: 50fL
wt.vs.rpl22a					wt.vs.rpl22b					wt.vs.rpl34a					wt.vs.rpl34b					rpl22a.vs.rpl22b					rpl22a.vs.rpl34a					rpl22a.vs.rpl34b					rpl22b.vs.rpl34a					rpl22b.vs.rpl34b					rpl34a.vs.rpl34b
[truncated: 1,509 more rows]

[truncated: 6 more sheets: 55fL, 60fL, 65fL, 70fL, 75fL, cumulative]
