# Supplementary material for: Translational control of methionine and serine metabolic pathways underpin the paralog-specific phenotypes of Rpl22 ribosomal protein mutants in cell division and replicative longevity
Source: bioRxiv preprint, doi:10.1101/2020.02.05.935726, version 1 (2020-02-06)
Supplement: File7 [file 935726_file08.xlsx]

## Sheet: pm_input
	xylulose	xylose	xylitol	xanthine	valine	uridine-5'-monophosphate	uridine	uric acid	urea	uracil	UDP-N-acetylglucosamine	tyrosine	tryptophan	trehalose-6-phosphate	trehalose	thymine	thymidine	threonine	threitol	tagatose	sucrose	succinic acid	stearic acid	spermidine	shikimic acid	serine	saccharopine	ribulose-5-phosphate	ribose-5-phosphate	ribose	ribitol	raffinose	pyrrole-2-carboxylic acid	pyrophosphate	pseudo uridine	proline	pipecolinic acid	phytosphingosine	phthalic acid	phosphogluconic acid	phosphoethanolamine	phosphate	phenylethylamine	phenylalanine	pentadecanoic acid	pelargonic acid	palmitoleic acid	palmitic acid	oxoproline
BY4742	737.507	2539.75	1157.8	3933.7	255019	1078.74	693.477	141.097	14262.8	8599.91	745.512	96316.2	28024.3	174.12	5808.99	748.514	702.483	67212.2	175.12	917.631	970.667	8872.1	904802	5075.49	3191.19	117520	1051.72	204.14	862.593	12658.7	2261.55	153.105	1855.28	7906.43	1729.19	96472.3	2887.98	5974.11	4995.43	5829.01	724.498	277666	381.262	49189.8	15400.6	120815	191111	272495	438383
BY4742	2386.57	2027.24	1019.11	357.337	244923	728.649	503.067	306.432	33894.1	6560.83	546.985	34696.6	29123	265.508	4181.24	470.128	1001.14	52000.5	456.154	1008.13	897.336	4436.77	1.06443e+06	2101.1	9474.43	79619.3	1099.96	350.35	710.682	22105	2426.5	272.495	2165.98	5263.24	1342.51	65431.6	2099.11	1999.29	10366.8	11196.2	2234.85	319028	788.537	42233.7	22884.6	166281	426431	383087	292220
BY4742	2051.85	2095.94	1529.87	3503.58	213721	708.331	498.937	273.514	5033.46	9938.67	465.875	34092	25424.8	485.913	2134.01	363.683	683.284	32610.3	409.77	1020.92	882.658	7730.52	1.58954e+06	1816.41	6968.09	64069.4	923.735	470.885	604.135	12617.7	2395.5	217.408	2848.35	7103.34	1635.07	49499	3204.02	2579.85	14107.5	9342.55	1995.75	266084	846.59	32927.9	18528.8	164623	363995	467952	258251
rpl22a	1494.55	3812.31	1480.57	2731.36	203772	1600.45	694.328	528.489	27061.8	8833.45	984.048	53203.5	17179.4	1021.01	7633.61	1007.03	777.248	31876.1	666.355	1526.52	1733.32	3641.48	1.88054e+06	2897.2	4796.36	55235.5	1765.29	1030	648.372	13495.9	1940.12	353.658	3710.41	10424.9	2082.98	47055.5	3480.63	1614.44	17910.7	13441	2114.95	99233	1038.99	32639.4	29240.7	312794	245791	471572	292364
rpl22a	1446.86	3456.89	979.551	2682.03	144537	8238.81	576.148	515.238	31006.1	7495.91	738.907	62751.2	18320.9	384.431	4046.01	889.684	809.802	25436.4	473.3	1382.95	1040.46	8658.19	1.94916e+06	1459.84	3456.89	60751.1	1354	387.427	735.911	9977.24	1296.08	384.431	1574.67	7813.44	2596.16	16887	2554.22	1786.36	14412.7	10488.5	1959.1	134628	483.285	23948.6	26752.4	434883	222710	485352	297534
rpl22a	1723.61	4118.67	1091.12	2807.73	269029	814.341	866.299	579.531	25837.1	8481.14	378.694	96371	23641.9	507.589	6388.83	985.203	748.394	45528.2	467.622	645.478	2118.29	6890.42	1.52197e+06	3130.47	4154.64	73262.7	1525.77	484.608	586.525	11634.6	2313.13	395.68	2217.21	7436.98	2803.73	63367.7	4112.67	945.235	10933.2	9173.58	566.542	152305	602.512	51076.7	24910.8	158071	184830	401808	408366
rpl22b	1051.1	1986.07	515.539	4122.31	232218	225.235	611.639	96.1004	11500	10078.5	665.695	113790	40567.4	95.0993	6872.18	481.503	579.605	75384.8	145.152	288.301	399.417	7798.15	480785	5977.24	1835.92	138036	1524.59	181.189	1271.33	12680.2	1788.87	88.092	860.899	10538	1311.37	102576	2429.54	954.998	3998.18	5123.35	938.981	366849	187.196	69882	13668.3	57311.9	179650	176054	570927
rpl22b	784.714	2756.51	438.399	3251.96	246532	464.422	625.569	134.122	12546.4	12330.2	384.35	116089	37430	148.135	12804.6	752.685	813.74	78641.5	198.18	267.243	375.341	7021.39	503996	7113.47	1763.6	153585	1326.21	216.197	1427.3	12004.9	1977.8	113.103	1006.92	8573.8	1610.46	90319.2	2008.83	1126.02	3683.35	6218.66	1043.95	396550	263.239	68197	13631.4	74911.1	180435	179025	697713
rpl22b	745.441	1693	1080.64	2951.74	250378	956.565	515.305	167.099	15011.9	9779.78	895.529	103620	37317.1	230.136	6932.1	572.338	719.425	68532.5	318.188	377.223	532.315	5361.17	753115	5514.26	2574.52	127234	1253.74	172.102	859.508	10299.1	2065.22	190.112	977.578	5530.27	1856.1	86391.1	3242.92	953.564	3156.87	3687.18	876.518	270449	244.144	68410.4	13854.2	62759.1	136024	207338	496367
[truncated: 96 more columns]

## Sheet: ba_input
	5'-Methylthioadenosine	Abscisic acid	Acetylcarnitine	Adenine	Adenosine	ADMA	Betaine	Carnitine	Glutamic acid	Hypoxanthine	Indarubicin	Lysine	Octopine	Phenylalanine	Propionylcarnitine	Tryptophan	1,2-Dimyristin	1,5-Hexadien-3-ol	5'-S-Methyl-5'-thioadenosine	Benzyldimethyltetradecylammonium	Butanoic acid, 4-(2,4-dichlorophenoxy)-, methyl ester	Choline	Hexadecyltrimethylammonium	L-Carnosine	Nicotinamide;	S-Adenosyl-L-homocysteine	Stearoyl-L-carnitine	Thiamine	1-Methyladenosine A	1-Methylguanosine	3'-Deoxydenosine	3-Methylcytidine	4-Guanidinobutyric acid	7-Methylguanosine	Anserine	Arginine	Carnosine	Citrulline	Creatinine	Cyclo(Leu-Pro)	Cytidine	Cytosine	Ergothioneine	Ethynylestradiol	Flavin?adenine?dinucleotide	gamma-Glutamylleucine	Glutamine	Glutathione (reduced)	GR 89696
Metabolite	146	147	148	149	150	151	152	153	154	155	156	157	158	159	160	161	162	163	164	165	166	167	168	169	170	171	172	173	174	175	176	177	178	179	180	181	182	183	184	185	186	187	188	189	190	191	192	193	194
BY4742	38899.8	23158.5	619550	14608.1	196238	23969.7	71029.7	107258	14292.2	34619.5	6766.96	95748.5	14725.3	49023.8	19894.3	6338.93	118512	486.121	271347	23499.9	65.2237	1.73066e+06	26454.3	32990	98144.4	12850.1	11670	50079.6	1659.13	722.557	2825	150.83	13110	260.895	130.447	1.06708e+06	620.645	1201.54	25511.7	4124.38	1468.55	905.999	85.6062	76.4341	328.157	350.578	7555.76	423.954	510.58
BY4742	30879.9	19169.5	336647	15705.7	260722	18735.5	129711	68177.1	11058.5	33867.6	7822.7	66125.8	11904.3	37199.8	11707.4	5349.41	245324	465.123	197290	41688.2	378.728	2.0766e+06	15664.5	24652.5	127646	17657.6	4014.32	140901	1833.37	514.347	2888.18	298.362	14676	384.756	173.793	855836	476.173	944.309	15387.2	2702.33	1041.75	807.686	12.055	200.917	778.553	281.284	6721.67	179.821	496.265
BY4742	34825.7	23896.1	610803	12921.6	183831	25472.6	159439	92983.5	16544	34038.7	5363.29	115330	16596.1	58000.6	21064.1	7583.22	125859	422.806	219744	25530.4	127.564	1.71554e+06	56839.7	35822.1	100599	13495.3	1772.25	44929.7	1816.38	823.949	2855.34	106.704	18652.4	324.124	148.423	1.02782e+06	665.096	1173.75	22959.1	3797.23	1929.5	685.956	92.2631	187.735	358.623	413.98	8701.61	596.902	830.368
rpl22a	11313.4	42068.3	216919	18528.4	179913	13504.7	245350	30452.5	11190.4	36262.4	18032.4	30972.7	26590	43092.4	5725.22	6142.52	137817	1114.81	81378.8	141310	1161.17	2.5158e+06	29255.1	16570.9	27462.9	12891.8	23558.1	72234.6	4154.82	1199.47	1465.58	235.863	10668.3	88.7006	187.481	834693	747.908	5483.31	7231.12	4330.2	1894.97	1987.7	24.1911	163.29	671.303	161.274	5485.33	505.997	163.29
rpl22a	14713.6	38649.8	169133	14266.6	218357	16470.5	154250	34148.6	12011.5	35064.8	17282.2	39599.4	25931.1	45190.4	5072.8	6233.7	198188	567.104	103291	91437.2	916.262	2.36547e+06	19181.5	16270.3	26022.3	15445.2	6391.59	77735.5	4296.65	1180.91	1227.61	349.158	9491.76	133.436	344.71	1.06387e+06	880.679	4745.88	7303.41	4298.87	1716.88	1547.86	309.127	431.444	778.378	349.158	5957.93	682.749	331.367
rpl22a	17586.4	40009.4	252103	11901.9	175069	14495.5	137316	34969.2	12214.6	38053	31766.9	42342.5	25158.7	55080.5	6961.15	6856.93	134491	895.31	120573	188242	679.772	2.24561e+06	31544.3	23960.2	32214.6	13666.5	43439.1	60191.8	4277.59	1430.6	1525.34	466.603	11075.3	272.383	374.23	1.02108e+06	1084.79	2558.03	9076.26	5452.39	2394.6	1103.74	239.223	54.4765	438.181	933.206	5779.25	352.913	426.338
rpl22b	36642.2	15695	436120	16711.7	195087	28164.3	164868	92385.2	15522.6	29148.8	4888.91	105592	9563.09	48343.4	16062.1	6579.87	197232	781.21	233031	27544.8	70.8092	1.86183e+06	6878.5	30769.7	93393.5	15616.5	2005.75	110211	1924.93	692.698	3070.96	208.579	24514.6	364.821	79.2755	998497	467.956	1126.79	27638.7	3697.47	1737.13	682.693	96.2081	41.5619	363.282	447.175	7083.23	501.822	727.333
rpl22b	31957	23493.4	492474	13295.2	158106	34086.1	52918.2	108399	23686.7	25717.9	4115.46	151895	14654.6	56705.1	18744.8	6796.54	178485	309.521	233559	32003.7	856.567	1.85777e+06	5571.38	22899	97814.8	16711.1	2193.72	60764.6	1996.19	744.573	2681.69	0.910718	12910	382.748	83.6876	1.05279e+06	625.811	989.483	27541.8	4260.68	1444.84	644.271	33.2289	195.066	483.665	369.21	7828.48	475.05	723.036
rpl22b	33029.2	26036.2	565530	15688.1	143183	36910.9	161271	106643	26423.5	29610.1	5402.7	154474	16183.2	63166.7	21251.1	7958.9	96257.1	102.383	223307	28194.9	797.506	1.69831e+06	5474.77	27550.3	76524.2	11858.9	1411.13	55698.8	2318.43	860.148	3077.54	295.023	24611.6	326.681	101.035	1.10888e+06	668.181	1080.41	30726.9	4391	2288.12	1882.63	145.491	122.59	337.458	575.228	9218.47	355.645	1281.8
[truncated: 30 more columns]

## Sheet: aa_input
	Asp	Glu	Asn	Ser	Gln	His	Gly	Thr	Ala	Arg	Tyr	Val	Met	Trp	Phe	Ile	Leu	Lys	Pro
WT	1.96297	7.63222	0.407479	0.730132	1.29205	1.89281	4.54886	1.76466	2.68097	13.9931	0.339324	0.684037	0.115879	0.433245	0.419113	0.254146	0.762046	10.5652	0.569125
WT	1.97994	7.68631	0.21175	0.739542	1.29356	1.86177	4.57126	1.76497	2.70092	14.0428	0.334621	0.683801	0.123622	0.442001	0.422005	0.256511	0.756641	10.6193	0.555993
WT	2.037	8.065	0.238222	0.730953	1.26405	1.8927	4.53251	1.71111	2.70851	14.2868	0.330219	0.666969	0.115337	0.479793	0.40789	0.304207	0.422609	10.3237	0.529774
rpl22a	1.83744	9.53703	0.691566	1.25516	2.74247	1.93831	1.32735	1.51282	2.04686	13.5328	0.639646	0.671687	0.160466	0.0190823	0.50941	0.344509	0.769067	11.1484	0.363211
rpl22a	1.83336	9.61568	0.698303	1.24746	2.75096	1.92277	1.30858	1.4998	2.03738	13.4867	0.639565	0.668891	0.161945	0.0119422	0.511802	0.344925	0.766014	11.1792	0.362001
rpl22a	1.84283	9.56689	0.692359	1.24932	2.73066	1.93486	1.305	1.48325	2.03205	13.5118	0.638859	0.670498	0.159687	0.014307	0.511942	0.345376	0.742992	11.2612	0.353426
rpl22b	2.31859	7.58795	0.477407	0.70497	1.83177	1.80052	5.54951	1.65061	3.50522	11.5696	0.338615	0.710003	0.0993651	0.617207	0.398338	0.2639	0.589536	10.2724	0.761775
rpl22b	2.31341	7.61221	0.483245	0.699052	1.84505	1.80232	5.52011	1.65718	3.52435	11.6789	0.339219	0.712963	0.097989	0.692727	0.409296	0.290613	0.561954	10.1	0.7068
rpl22b	2.369	7.70826	0.475539	0.695273	1.82771	1.79666	5.53716	1.64757	3.50194	11.6079	0.339819	0.714424	0.100074	0.668815	0.412393	0.287781	0.566271	10.1183	0.67254
